# Supplementary material for: Comparing enzyme activity modifier equations through the development of global data fitting templates in Excel
Source: PeerJ. 2018 Dec 14;6:e6082. doi: 10.7717/peerj.6082 (PMC6296338; doi:10.7717/peerj.6082)
Supplement: Supplemental Information 2 [file peerj-06-6082-s002.xlsx]

## Sheet: Raw data and fitting summary
		No Inhibitor	[I]1	[I]2	[I]3	[I]4	[I]5	[I]6	[I]7	[I]8	[I]9	[I]10	[I]11	[I]12	[I]13	[I]14	[I]15
[S]1
[S]2
[S]3
[S]4
[S]5
[S]6
[S]7
[S]8
[S]9
[S]10
[S]11
[S]12
[S]13
[S]14
[S]15
		Direct linear plot Km, Vmax estimates
							#DIV/0!	0	#NUM!	#DIV/0!	#NUM!	#DIV/0!	#NUM!	#N/A	#N/A
		Km	#NUM!				#DIV/0!	0	#NUM!	#DIV/0!	#NUM!	#DIV/0!	#NUM!	#N/A	#N/A
		Vmax	#NUM!					0	#NUM!	#DIV/0!	#NUM!	#DIV/0!	#NUM!	#N/A	#N/A
								0	#NUM!	#DIV/0!	#NUM!	#DIV/0!	#NUM!	#N/A	#N/A
	Ki estimate based on linear decrease in activity							0	#NUM!	#DIV/0!	#NUM!	#DIV/0!	#NUM!	#N/A	#N/A
								0	#NUM!	#DIV/0!	#NUM!	#DIV/0!	#NUM!	#N/A	#N/A
		Ki	#DIV/0!					0	#NUM!	#DIV/0!	#NUM!	#DIV/0!	#NUM!	#N/A	#N/A
								0	#NUM!	#DIV/0!	#NUM!	#DIV/0!	#NUM!	#N/A	#N/A
								0	#NUM!	#DIV/0!	#NUM!	#DIV/0!	#NUM!	#N/A	#N/A
								0	#NUM!	#DIV/0!	#NUM!	#DIV/0!	#NUM!	#N/A	#N/A
								0	#NUM!	#DIV/0!	#NUM!	#DIV/0!	#NUM!	#N/A	#N/A
								0	#NUM!	#DIV/0!	#NUM!	#DIV/0!	#NUM!	#N/A	#N/A
								0	#NUM!	#DIV/0!	#NUM!	#DIV/0!	#NUM!	#N/A	#N/A
								0	#NUM!	#DIV/0!	#NUM!	#DIV/0!	#NUM!	#N/A	#N/A
								0	#NUM!	#DIV/0!	#NUM!	#DIV/0!	#NUM!	#N/A	#N/A
			Km	Km2	Vmax	Vmax2	Ki	aKi	RSS	RSE	n	k	BIC
		Non-competitive	#NUM!		#NUM!		#DIV/0!		0	0	0	3	#DIV/0!
		Competitive	#NUM!		#NUM!		#DIV/0!		0	0	0	3	#DIV/0!
		Uncompetitive	#NUM!		#NUM!		#DIV/0!		0	0	0	3	#DIV/0!
		Mixed Non-competitive	#NUM!		#NUM!		#DIV/0!	#DIV/0!	0	0	0	4	#DIV/0!
		Modifier equation	#NUM!	#NUM!	#NUM!	#NUM!	#DIV/0!		0	0	0	5	#DIV/0!
													Residual distribution
													Non-competitive	Competitive	Uncompetitive	Mixed Non-competitive	Modifier equation
												Minimum value	0	0	0	0	0
												First quartile	#NUM!	#NUM!	#NUM!	#NUM!	#NUM!
												Median value	#NUM!	#NUM!	#NUM!	#NUM!	#NUM!
					Non-competitive	Competitive	Uncompetitive	Mixed Non-competitive	Modifier equation			Third quartile	#NUM!	#NUM!	#NUM!	#NUM!	#NUM!
				Q1	#NUM!	#NUM!	#NUM!	#NUM!	#NUM!			Maximum value	0	0	0	0	0
				Min	0	0	0	0	0
				Median	#NUM!	#NUM!	#NUM!	#NUM!	#NUM!
				Max	0	0	0	0	0
				Q3	#NUM!	#NUM!	#NUM!	#NUM!	#NUM!
	Non-competitive
	Km	#NUM!
	Vmax	#NUM!
	Ki	#DIV/0!
	RSS	0
	Competitive
	Km	#NUM!
	Vmax	#NUM!
	Ki	#DIV/0!
	RSS	0
	Uncompetitive
	Km	#NUM!
	Vmax	#NUM!
	Ki	#DIV/0!
	RSS	0
	Mixed Non-competitive
	Km	#NUM!
	Vmax	#NUM!
	Ki	#DIV/0!
	aKi	#DIV/0!
	RSS	0
	Modifier equation
	Km	#NUM!
	Km2	#NUM!
	Vmax	#NUM!
	Vmax2	#NUM!
	Ki	#DIV/0!
	RSS	0

## Sheet: modified direct linear plot
Km/Vmax direct plot
									Intercept points x-axis																				Intercept points x-axis
										Line 1	Line 2	Line 3	Line 4	Line 5	Line 6	Line 7	Line 8	Line 9	Line 10	Line 11	Line 12	Line 13	Line 14	Line 15						Line 1	Line 2	Line 3	Line 4	Line 5	Line 6	Line 7	Line 8	Line 9	Line 10	Line 11	Line 12	Line 13	Line 14	Line 15
			x-intercept	y-interecept					Line 1																				Line 1
[Substrate]		v	[Substrate]/v	1/v					Line 2	#DIV/0!																			Line 2
0		0	0	#DIV/0!					Line 3	#DIV/0!	#DIV/0!																		Line 3
0		0	#DIV/0!	#DIV/0!					Line 4	#DIV/0!	#DIV/0!	#DIV/0!																	Line 4
0		0	#DIV/0!	#DIV/0!					Line 5	#DIV/0!	#DIV/0!	#DIV/0!	#DIV/0!																Line 5
0		0	#DIV/0!	#DIV/0!					Line 6	#DIV/0!	#DIV/0!	#DIV/0!	#DIV/0!	#DIV/0!															Line 6
0		0	#DIV/0!	#DIV/0!					Line 7	#DIV/0!	#DIV/0!	#DIV/0!	#DIV/0!	#DIV/0!	#DIV/0!														Line 7
0		0	#DIV/0!	#DIV/0!					Line 8	#DIV/0!	#DIV/0!	#DIV/0!	#DIV/0!	#DIV/0!	#DIV/0!	#DIV/0!													Line 8
0		0	#DIV/0!	#DIV/0!					Line 9	#DIV/0!	#DIV/0!	#DIV/0!	#DIV/0!	#DIV/0!	#DIV/0!	#DIV/0!	#DIV/0!												Line 9
0		0	#DIV/0!	#DIV/0!					Line 10	#DIV/0!	#DIV/0!	#DIV/0!	#DIV/0!	#DIV/0!	#DIV/0!	#DIV/0!	#DIV/0!	#DIV/0!											Line 10
0		0	#DIV/0!	#DIV/0!					Line 11	#DIV/0!	#DIV/0!	#DIV/0!	#DIV/0!	#DIV/0!	#DIV/0!	#DIV/0!	#DIV/0!	#DIV/0!	#DIV/0!										Line 11
0		0	#DIV/0!	#DIV/0!					Line 12	#DIV/0!	#DIV/0!	#DIV/0!	#DIV/0!	#DIV/0!	#DIV/0!	#DIV/0!	#DIV/0!	#DIV/0!	#DIV/0!	#DIV/0!									Line 12
0		0	#DIV/0!	#DIV/0!					Line 13	#DIV/0!	#DIV/0!	#DIV/0!	#DIV/0!	#DIV/0!	#DIV/0!	#DIV/0!	#DIV/0!	#DIV/0!	#DIV/0!	#DIV/0!	#DIV/0!								Line 13
0		0	#DIV/0!	#DIV/0!					Line 14	#DIV/0!	#DIV/0!	#DIV/0!	#DIV/0!	#DIV/0!	#DIV/0!	#DIV/0!	#DIV/0!	#DIV/0!	#DIV/0!	#DIV/0!	#DIV/0!	#DIV/0!							Line 14
0		0	#DIV/0!	#DIV/0!					Line 15	#DIV/0!	#DIV/0!	#DIV/0!	#DIV/0!	#DIV/0!	#DIV/0!	#DIV/0!	#DIV/0!	#DIV/0!	#DIV/0!	#DIV/0!	#DIV/0!	#DIV/0!	#DIV/0!						Line 15
0		0	#DIV/0!	#DIV/0!
0		0	#DIV/0!	#DIV/0!
																														Km/Vmax (x-axis):	#NUM!		Km:	#NUM!
																														Standard dev:	#DIV/0!
Line 1	x	y
	0	#DIV/0!		Slope:	#VALUE!
	0	0		y-intercept:	#DIV/0!				1/Intercept points y-axis																				1/Intercept points y-axis
										Line 1	Line 2	Line 3	Line 4	Line 5	Line 6	Line 7	Line 8	Line 9	Line 10	Line 11	Line 12	Line 13	Line 14	Line 15						Line 1	Line 2	Line 3	Line 4	Line 5	Line 6	Line 7	Line 8	Line 9	Line 10	Line 11	Line 12	Line 13	Line 14	Line 15
Line 2	x	y							Line 1																				Line 1
	0	#DIV/0!		Slope:	#VALUE!				Line 2	#DIV/0!																			Line 2
	#DIV/0!	0		y-intercept:	#DIV/0!				Line 3	#DIV/0!	#DIV/0!																		Line 3
									Line 4	#DIV/0!	#DIV/0!	#DIV/0!																	Line 4
Line 3	x	y							Line 5	#DIV/0!	#DIV/0!	#DIV/0!	#DIV/0!																Line 5
	0	#DIV/0!		Slope:	#VALUE!				Line 6	#DIV/0!	#DIV/0!	#DIV/0!	#DIV/0!	#DIV/0!															Line 6
	#DIV/0!	0		y-intercept:	#DIV/0!				Line 7	#DIV/0!	#DIV/0!	#DIV/0!	#DIV/0!	#DIV/0!	#DIV/0!														Line 7
									Line 8	#DIV/0!	#DIV/0!	#DIV/0!	#DIV/0!	#DIV/0!	#DIV/0!	#DIV/0!													Line 8
Line 4	x	y							Line 9	#DIV/0!	#DIV/0!	#DIV/0!	#DIV/0!	#DIV/0!	#DIV/0!	#DIV/0!	#DIV/0!												Line 9
	0	#DIV/0!		Slope:	#VALUE!				Line 10	#DIV/0!	#DIV/0!	#DIV/0!	#DIV/0!	#DIV/0!	#DIV/0!	#DIV/0!	#DIV/0!	#DIV/0!											Line 10
	#DIV/0!	0		y-intercept:	#DIV/0!				Line 11	#DIV/0!	#DIV/0!	#DIV/0!	#DIV/0!	#DIV/0!	#DIV/0!	#DIV/0!	#DIV/0!	#DIV/0!	#DIV/0!										Line 11
									Line 12	#DIV/0!	#DIV/0!	#DIV/0!	#DIV/0!	#DIV/0!	#DIV/0!	#DIV/0!	#DIV/0!	#DIV/0!	#DIV/0!	#DIV/0!									Line 12
Line 5	x	y							Line 13	#DIV/0!	#DIV/0!	#DIV/0!	#DIV/0!	#DIV/0!	#DIV/0!	#DIV/0!	#DIV/0!	#DIV/0!	#DIV/0!	#DIV/0!	#DIV/0!								Line 13
	0	#DIV/0!		Slope:	#VALUE!				Line 14	#DIV/0!	#DIV/0!	#DIV/0!	#DIV/0!	#DIV/0!	#DIV/0!	#DIV/0!	#DIV/0!	#DIV/0!	#DIV/0!	#DIV/0!	#DIV/0!	#DIV/0!							Line 14
	#DIV/0!	0		y-intercept:	#DIV/0!				Line 15	#DIV/0!	#DIV/0!	#DIV/0!	#DIV/0!	#DIV/0!	#DIV/0!	#DIV/0!	#DIV/0!	#DIV/0!	#DIV/0!	#DIV/0!	#DIV/0!	#DIV/0!	#DIV/0!						Line 15
Line 6	x	y
	0	#DIV/0!		Slope:	#VALUE!
	#DIV/0!	0		y-intercept:	#DIV/0!
Line 7	x	y																												Vmax:	#NUM!
	0	#DIV/0!		Slope:	#VALUE!																									Standard dev:	#DIV/0!
	#DIV/0!	0		y-intercept:	#DIV/0!
Line 8	x	y
	0	#DIV/0!		Slope:	#VALUE!
	#DIV/0!	0		y-intercept:	#DIV/0!
Line 9	x	y
	0	#DIV/0!		Slope:	#VALUE!
	#DIV/0!	0		y-intercept:	#DIV/0!
Line 10	x	y
	0	#DIV/0!		Slope:	#VALUE!
	#DIV/0!	0		y-intercept:	#DIV/0!
Line 11	x	y										0	#DIV/0!	#DIV/0!	#DIV/0!	#DIV/0!	#DIV/0!	#DIV/0!	#DIV/0!	#DIV/0!	#DIV/0!	#DIV/0!	#DIV/0!	#DIV/0!	#DIV/0!	#DIV/0!	#DIV/0!	0	0	0	0
	0	#DIV/0!		Slope:	#VALUE!							0	0
	#DIV/0!	0		y-intercept:	#DIV/0!							#DIV/0!		0
												#DIV/0!			0
Line 12	x	y										#DIV/0!				0
	0	#DIV/0!		Slope:	#VALUE!							#DIV/0!					0
	#DIV/0!	0		y-intercept:	#DIV/0!							#DIV/0!						0
												#DIV/0!							0
Line 13	x	y										#DIV/0!								0
	0	#DIV/0!		Slope:	#VALUE!							#DIV/0!									0
	#DIV/0!	0		y-intercept:	#DIV/0!							#DIV/0!										0
												#DIV/0!											0
Line 14	x	y										#DIV/0!												0
	0	#DIV/0!		Slope:	#VALUE!							#DIV/0!													0
	#DIV/0!	0		y-intercept:	#DIV/0!							#DIV/0!														0
												#DIV/0!															0
Line 15	x	y										0																0
	0	#DIV/0!		Slope:	#VALUE!							0																	0
	#DIV/0!	0		y-intercept:	#DIV/0!							0																		0
												0																			0

## Sheet: Non-competitive
																							Calculated values
		No Inhibitor	[I]1	[I]2	[I]3	[I]4	[I]5	[I]6	[I]7	[I]8	[I]9	[I]10	[I]11	[I]12	[I]13	[I]14	[I]15						No Inhibitor	[I]1	[I]2	[I]3	[I]4	[I]5	[I]6	[I]7	[I]8	[I]9	[I]10	[I]11	[I]12	[I]13	[I]14	[I]15
		0	0	0	0	0	0	0	0	0	0	0	0	0	0	0	0		Km	Vmax	Ki		0	0	0	0	0	0	0	0	0	0	0	0	0	0	0	0
[S]1	0	0	0	0	0	0	0	0	0	0	0	0	0	0	0	0	0		#NUM!	#NUM!	#DIV/0!		#NUM!	#NUM!	#NUM!	#NUM!	#NUM!	#NUM!	#NUM!	#NUM!	#NUM!	#NUM!	#NUM!	#NUM!	#NUM!	#NUM!	#NUM!	#NUM!		0	0	0	0	0	0	0	0	0	0
[S]2	0	0	0	0	0	0	0	0	0	0	0	0	0	0	0	0	0						#NUM!	#NUM!	#NUM!	#NUM!	#NUM!	#NUM!	#NUM!	#NUM!	#NUM!	#NUM!	#NUM!	#NUM!	#NUM!	#NUM!	#NUM!	#NUM!		0	0	0	0	0	0	0	0	0	0
[S]3	0	0	0	0	0	0	0	0	0	0	0	0	0	0	0	0	0						#NUM!	#NUM!	#NUM!	#NUM!	#NUM!	#NUM!	#NUM!	#NUM!	#NUM!	#NUM!	#NUM!	#NUM!	#NUM!	#NUM!	#NUM!	#NUM!		0	0	0	0	0	0	0	0	0	0
[S]4	0	0	0	0	0	0	0	0	0	0	0	0	0	0	0	0	0						#NUM!	#NUM!	#NUM!	#NUM!	#NUM!	#NUM!	#NUM!	#NUM!	#NUM!	#NUM!	#NUM!	#NUM!	#NUM!	#NUM!	#NUM!	#NUM!		0	0	0	0	0	0	0	0	0	0
[S]5	0	0	0	0	0	0	0	0	0	0	0	0	0	0	0	0	0						#NUM!	#NUM!	#NUM!	#NUM!	#NUM!	#NUM!	#NUM!	#NUM!	#NUM!	#NUM!	#NUM!	#NUM!	#NUM!	#NUM!	#NUM!	#NUM!		0	0	0	0	0	0	0	0	0	0
[S]6	0	0	0	0	0	0	0	0	0	0	0	0	0	0	0	0	0			Sum R2	0		#NUM!	#NUM!	#NUM!	#NUM!	#NUM!	#NUM!	#NUM!	#NUM!	#NUM!	#NUM!	#NUM!	#NUM!	#NUM!	#NUM!	#NUM!	#NUM!		0	0	0	0	0	0	0	0	0	0
[S]7	0	0	0	0	0	0	0	0	0	0	0	0	0	0	0	0	0			Sum residuals %	0		#NUM!	#NUM!	#NUM!	#NUM!	#NUM!	#NUM!	#NUM!	#NUM!	#NUM!	#NUM!	#NUM!	#NUM!	#NUM!	#NUM!	#NUM!	#NUM!		0	0	0	0	0	0	0	0	0	0
[S]8	0	0	0	0	0	0	0	0	0	0	0	0	0	0	0	0	0						#NUM!	#NUM!	#NUM!	#NUM!	#NUM!	#NUM!	#NUM!	#NUM!	#NUM!	#NUM!	#NUM!	#NUM!	#NUM!	#NUM!	#NUM!	#NUM!		0	0	0	0	0	0	0	0	0	0
[S]9	0	0	0	0	0	0	0	0	0	0	0	0	0	0	0	0	0						#NUM!	#NUM!	#NUM!	#NUM!	#NUM!	#NUM!	#NUM!	#NUM!	#NUM!	#NUM!	#NUM!	#NUM!	#NUM!	#NUM!	#NUM!	#NUM!		0	0	0	0	0	0	0	0	0	0
[S]10	0	0	0	0	0	0	0	0	0	0	0	0	0	0	0	0	0						#NUM!	#NUM!	#NUM!	#NUM!	#NUM!	#NUM!	#NUM!	#NUM!	#NUM!	#NUM!	#NUM!	#NUM!	#NUM!	#NUM!	#NUM!	#NUM!		0	0	0	0	0	0	0	0	0	0
[S]11	0	0	0	0	0	0	0	0	0	0	0	0	0	0	0	0	0						#NUM!	#NUM!	#NUM!	#NUM!	#NUM!	#NUM!	#NUM!	#NUM!	#NUM!	#NUM!	#NUM!	#NUM!	#NUM!	#NUM!	#NUM!	#NUM!		0	0	0	0	0	0	0	0	0	0
[S]12	0	0	0	0	0	0	0	0	0	0	0	0	0	0	0	0	0						#NUM!	#NUM!	#NUM!	#NUM!	#NUM!	#NUM!	#NUM!	#NUM!	#NUM!	#NUM!	#NUM!	#NUM!	#NUM!	#NUM!	#NUM!	#NUM!		0	0	0	0	0	0	0	0	0	0
[S]13	0	0	0	0	0	0	0	0	0	0	0	0	0	0	0	0	0						#NUM!	#NUM!	#NUM!	#NUM!	#NUM!	#NUM!	#NUM!	#NUM!	#NUM!	#NUM!	#NUM!	#NUM!	#NUM!	#NUM!	#NUM!	#NUM!		0	0	0	0	0	0	0	0	0	0
[S]14	0	0	0	0	0	0	0	0	0	0	0	0	0	0	0	0	0						#NUM!	#NUM!	#NUM!	#NUM!	#NUM!	#NUM!	#NUM!	#NUM!	#NUM!	#NUM!	#NUM!	#NUM!	#NUM!	#NUM!	#NUM!	#NUM!		0	0	0	0	0	0	0	0	0	0
[S]15	0	0	0	0	0	0	0	0	0	0	0	0	0	0	0	0	0						#NUM!	#NUM!	#NUM!	#NUM!	#NUM!	#NUM!	#NUM!	#NUM!	#NUM!	#NUM!	#NUM!	#NUM!	#NUM!	#NUM!	#NUM!	#NUM!		0	0	0	0	0	0	0	0	0	0
	#DIV/0!	#DIV/0!	#DIV/0!	#DIV/0!	#DIV/0!	#DIV/0!	#DIV/0!	#DIV/0!	#DIV/0!	#DIV/0!	#DIV/0!	#DIV/0!	#DIV/0!	#DIV/0!	#DIV/0!	#DIV/0!	#DIV/0!																					#DIV/0!	#N/A	#N/A	#N/A	#N/A	#N/A	#N/A	#N/A	#N/A	#N/A	#N/A	#N/A
	#DIV/0!	#DIV/0!	#DIV/0!	#DIV/0!	#DIV/0!	#DIV/0!	#DIV/0!	#DIV/0!	#DIV/0!	#DIV/0!	#DIV/0!	#DIV/0!	#DIV/0!	#DIV/0!	#DIV/0!	#DIV/0!	#DIV/0!					#DIV/0!	#N/A	#N/A		#NUM!		1										#DIV/0!	#N/A	#N/A	#N/A	#N/A	#N/A	#N/A	#N/A	#N/A	#N/A	#N/A	#N/A
	#DIV/0!	#DIV/0!	#DIV/0!	#DIV/0!	#DIV/0!	#DIV/0!	#DIV/0!	#DIV/0!	#DIV/0!	#DIV/0!	#DIV/0!	#DIV/0!	#DIV/0!	#DIV/0!	#DIV/0!	#DIV/0!	#DIV/0!					#DIV/0!	#N/A	#N/A		#NUM!		1										#DIV/0!	#N/A	#N/A	#N/A	#N/A	#N/A	#N/A	#N/A	#N/A	#N/A	#N/A	#N/A
	#DIV/0!	#DIV/0!	#DIV/0!	#DIV/0!	#DIV/0!	#DIV/0!	#DIV/0!	#DIV/0!	#DIV/0!	#DIV/0!	#DIV/0!	#DIV/0!	#DIV/0!	#DIV/0!	#DIV/0!	#DIV/0!	#DIV/0!					#DIV/0!	#N/A	#N/A		#NUM!		1										#DIV/0!	#N/A	#N/A	#N/A	#N/A	#N/A	#N/A	#N/A	#N/A	#N/A	#N/A	#N/A
	#DIV/0!	#DIV/0!	#DIV/0!	#DIV/0!	#DIV/0!	#DIV/0!	#DIV/0!	#DIV/0!	#DIV/0!	#DIV/0!	#DIV/0!	#DIV/0!	#DIV/0!	#DIV/0!	#DIV/0!	#DIV/0!	#DIV/0!					#DIV/0!	#N/A	#N/A		#NUM!		1										#DIV/0!	#N/A	#N/A	#N/A	#N/A	#N/A	#N/A	#N/A	#N/A	#N/A	#N/A	#N/A
	#DIV/0!	#DIV/0!	#DIV/0!	#DIV/0!	#DIV/0!	#DIV/0!	#DIV/0!	#DIV/0!	#DIV/0!	#DIV/0!	#DIV/0!	#DIV/0!	#DIV/0!	#DIV/0!	#DIV/0!	#DIV/0!	#DIV/0!					#DIV/0!	#N/A	#N/A		#NUM!		1										#DIV/0!	#N/A	#N/A	#N/A	#N/A	#N/A	#N/A	#N/A	#N/A	#N/A	#N/A	#N/A
	#DIV/0!	#DIV/0!	#DIV/0!	#DIV/0!	#DIV/0!	#DIV/0!	#DIV/0!	#DIV/0!	#DIV/0!	#DIV/0!	#DIV/0!	#DIV/0!	#DIV/0!	#DIV/0!	#DIV/0!	#DIV/0!	#DIV/0!					#DIV/0!	#N/A	#N/A		#NUM!		1										#DIV/0!	#N/A	#N/A	#N/A	#N/A	#N/A	#N/A	#N/A	#N/A	#N/A	#N/A	#N/A
	#DIV/0!	#DIV/0!	#DIV/0!	#DIV/0!	#DIV/0!	#DIV/0!	#DIV/0!	#DIV/0!	#DIV/0!	#DIV/0!	#DIV/0!	#DIV/0!	#DIV/0!	#DIV/0!	#DIV/0!	#DIV/0!	#DIV/0!					#DIV/0!	#N/A	#N/A		#NUM!		1										#DIV/0!	#N/A	#N/A	#N/A	#N/A	#N/A	#N/A	#N/A	#N/A	#N/A	#N/A	#N/A
	#DIV/0!	#DIV/0!	#DIV/0!	#DIV/0!	#DIV/0!	#DIV/0!	#DIV/0!	#DIV/0!	#DIV/0!	#DIV/0!	#DIV/0!	#DIV/0!	#DIV/0!	#DIV/0!	#DIV/0!	#DIV/0!	#DIV/0!					#DIV/0!	#N/A	#N/A		#NUM!		1										#DIV/0!	#N/A	#N/A	#N/A	#N/A	#N/A	#N/A	#N/A	#N/A	#N/A	#N/A	#N/A
	#DIV/0!	#DIV/0!	#DIV/0!	#DIV/0!	#DIV/0!	#DIV/0!	#DIV/0!	#DIV/0!	#DIV/0!	#DIV/0!	#DIV/0!	#DIV/0!	#DIV/0!	#DIV/0!	#DIV/0!	#DIV/0!	#DIV/0!					#DIV/0!	#N/A	#N/A		#NUM!		1										#DIV/0!	#N/A	#N/A	#N/A	#N/A	#N/A	#N/A	#N/A	#N/A	#N/A	#N/A	#N/A
	#DIV/0!	#DIV/0!	#DIV/0!	#DIV/0!	#DIV/0!	#DIV/0!	#DIV/0!	#DIV/0!	#DIV/0!	#DIV/0!	#DIV/0!	#DIV/0!	#DIV/0!	#DIV/0!	#DIV/0!	#DIV/0!	#DIV/0!					#DIV/0!	#N/A	#N/A		#NUM!		1										#DIV/0!	#N/A	#N/A	#N/A	#N/A	#N/A	#N/A	#N/A	#N/A	#N/A	#N/A	#N/A
	#DIV/0!	#DIV/0!	#DIV/0!	#DIV/0!	#DIV/0!	#DIV/0!	#DIV/0!	#DIV/0!	#DIV/0!	#DIV/0!	#DIV/0!	#DIV/0!	#DIV/0!	#DIV/0!	#DIV/0!	#DIV/0!	#DIV/0!					#DIV/0!	#N/A	#N/A		#NUM!		1										#DIV/0!	#N/A	#N/A	#N/A	#N/A	#N/A	#N/A	#N/A	#N/A	#N/A	#N/A	#N/A
	#DIV/0!	#DIV/0!	#DIV/0!	#DIV/0!	#DIV/0!	#DIV/0!	#DIV/0!	#DIV/0!	#DIV/0!	#DIV/0!	#DIV/0!	#DIV/0!	#DIV/0!	#DIV/0!	#DIV/0!	#DIV/0!	#DIV/0!					#DIV/0!	#N/A	#N/A		#NUM!		1										#DIV/0!	#N/A	#N/A	#N/A	#N/A	#N/A	#N/A	#N/A	#N/A	#N/A	#N/A	#N/A
	#DIV/0!	#DIV/0!	#DIV/0!	#DIV/0!	#DIV/0!	#DIV/0!	#DIV/0!	#DIV/0!	#DIV/0!	#DIV/0!	#DIV/0!	#DIV/0!	#DIV/0!	#DIV/0!	#DIV/0!	#DIV/0!	#DIV/0!					#DIV/0!	#N/A	#N/A		#NUM!		1										#DIV/0!	#N/A	#N/A	#N/A	#N/A	#N/A	#N/A	#N/A	#N/A	#N/A	#N/A	#N/A
	#DIV/0!	#DIV/0!	#DIV/0!	#DIV/0!	#DIV/0!	#DIV/0!	#DIV/0!	#DIV/0!	#DIV/0!	#DIV/0!	#DIV/0!	#DIV/0!	#DIV/0!	#DIV/0!	#DIV/0!	#DIV/0!	#DIV/0!					#DIV/0!	#N/A	#N/A		#NUM!		1										#DIV/0!	#N/A	#N/A	#N/A	#N/A	#N/A	#N/A	#N/A	#N/A	#N/A	#N/A	#N/A
																						#DIV/0!	#N/A	#N/A		#NUM!		1
		0	0	0	0	0	0	0	0	0	0	0	0	0	0	0	0					#DIV/0!	#N/A	#N/A		#NUM!		1											#N/A	#N/A	#N/A	#N/A	#N/A	#N/A	#N/A	#N/A	#N/A	#N/A	#N/A
		0	0	0	0	0	0	0	0	0	0	0	0	0	0	0	0					#DIV/0!	#N/A	#N/A		#NUM!		1											#N/A	#N/A	#N/A	#N/A	#N/A	#N/A	#N/A	#N/A	#N/A	#N/A	#N/A
		0	0	0	0	0	0	0	0	0	0	0	0	0	0	0	0					#DIV/0!	#N/A	#N/A		#NUM!		1											#N/A	#N/A	#N/A	#N/A	#N/A	#N/A	#N/A	#N/A	#N/A	#N/A	#N/A
		0	0	0	0	0	0	0	0	0	0	0	0	0	0	0	0					#DIV/0!	#N/A	#N/A		#NUM!		1											#N/A	#N/A	#N/A	#N/A	#N/A	#N/A	#N/A	#N/A	#N/A	#N/A	#N/A
		0	0	0	0	0	0	0	0	0	0	0	0	0	0	0	0					#DIV/0!	#N/A	#N/A		#NUM!		1											#N/A	#N/A	#N/A	#N/A	#N/A	#N/A	#N/A	#N/A	#N/A	#N/A	#N/A
		0	0	0	0	0	0	0	0	0	0	0	0	0	0	0	0					#DIV/0!	#N/A	#N/A		#NUM!		1											#N/A	#N/A	#N/A	#N/A	#N/A	#N/A	#N/A	#N/A	#N/A	#N/A	#N/A
		0	0	0	0	0	0	0	0	0	0	0	0	0	0	0	0					#DIV/0!	#N/A	#N/A		#NUM!		1											#N/A	#N/A	#N/A	#N/A	#N/A	#N/A	#N/A	#N/A	#N/A	#N/A	#N/A
		0	0	0	0	0	0	0	0	0	0	0	0	0	0	0	0					#DIV/0!	#N/A	#N/A		#NUM!		1											#N/A	#N/A	#N/A	#N/A	#N/A	#N/A	#N/A	#N/A	#N/A	#N/A	#N/A
		0	0	0	0	0	0	0	0	0	0	0	0	0	0	0	0					#DIV/0!	#N/A	#N/A		#NUM!		1											#N/A	#N/A	#N/A	#N/A	#N/A	#N/A	#N/A	#N/A	#N/A	#N/A	#N/A
		0	0	0	0	0	0	0	0	0	0	0	0	0	0	0	0					#DIV/0!	#N/A	#N/A		#NUM!		1											#N/A	#N/A	#N/A	#N/A	#N/A	#N/A	#N/A	#N/A	#N/A	#N/A	#N/A
		0	0	0	0	0	0	0	0	0	0	0	0	0	0	0	0					#DIV/0!	#N/A	#N/A		#NUM!		1											#N/A	#N/A	#N/A	#N/A	#N/A	#N/A	#N/A	#N/A	#N/A	#N/A	#N/A
		0	0	0	0	0	0	0	0	0	0	0	0	0	0	0	0					#DIV/0!	#N/A	#N/A		#NUM!		1											#N/A	#N/A	#N/A	#N/A	#N/A	#N/A	#N/A	#N/A	#N/A	#N/A	#N/A
		0	0	0	0	0	0	0	0	0	0	0	0	0	0	0	0					#DIV/0!	#N/A	#N/A		#NUM!		1											#N/A	#N/A	#N/A	#N/A	#N/A	#N/A	#N/A	#N/A	#N/A	#N/A	#N/A
		0	0	0	0	0	0	0	0	0	0	0	0	0	0	0	0					#DIV/0!	#N/A	#N/A		#NUM!		1											#N/A	#N/A	#N/A	#N/A	#N/A	#N/A	#N/A	#N/A	#N/A	#N/A	#N/A
		0	0	0	0	0	0	0	0	0	0	0	0	0	0	0	0					#DIV/0!	#N/A	#N/A		#NUM!		1											#N/A	#N/A	#N/A	#N/A	#N/A	#N/A	#N/A	#N/A	#N/A	#N/A	#N/A
																						#DIV/0!	#N/A	#N/A		#NUM!		1
n	0																					#DIV/0!	#N/A	#N/A		#NUM!		1												#DIV/0!	#DIV/0!	#DIV/0!	#DIV/0!	#DIV/0!	#DIV/0!	#DIV/0!	#DIV/0!	#DIV/0!	#DIV/0!
																						#DIV/0!	#N/A	#N/A		#NUM!		1												#DIV/0!	#DIV/0!	#DIV/0!	#DIV/0!	#DIV/0!	#DIV/0!	#DIV/0!	#DIV/0!	#DIV/0!	#DIV/0!
																						#DIV/0!	#N/A	#N/A		#NUM!		1												#DIV/0!	#DIV/0!	#DIV/0!	#DIV/0!	#DIV/0!	#DIV/0!	#DIV/0!	#DIV/0!	#DIV/0!	#DIV/0!
																						#DIV/0!	#N/A	#N/A		#NUM!		1												#DIV/0!	#DIV/0!	#DIV/0!	#DIV/0!	#DIV/0!	#DIV/0!	#DIV/0!	#DIV/0!	#DIV/0!	#DIV/0!
																						#DIV/0!	#N/A	#N/A		#NUM!		1												#DIV/0!	#DIV/0!	#DIV/0!	#DIV/0!	#DIV/0!	#DIV/0!	#DIV/0!	#DIV/0!	#DIV/0!	#DIV/0!
																						#DIV/0!	#N/A	#N/A		#NUM!		1												#DIV/0!	#DIV/0!	#DIV/0!	#DIV/0!	#DIV/0!	#DIV/0!	#DIV/0!	#DIV/0!	#DIV/0!	#DIV/0!
																						#DIV/0!	#N/A	#N/A		#NUM!		1												#DIV/0!	#DIV/0!	#DIV/0!	#DIV/0!	#DIV/0!	#DIV/0!	#DIV/0!	#DIV/0!	#DIV/0!	#DIV/0!
																						#DIV/0!	#N/A	#N/A		#NUM!		1												#DIV/0!	#DIV/0!	#DIV/0!	#DIV/0!	#DIV/0!	#DIV/0!	#DIV/0!	#DIV/0!	#DIV/0!	#DIV/0!
																						#DIV/0!	#N/A	#N/A		#NUM!		1												#DIV/0!	#DIV/0!	#DIV/0!	#DIV/0!	#DIV/0!	#DIV/0!	#DIV/0!	#DIV/0!	#DIV/0!	#DIV/0!
																						#DIV/0!	#N/A	#N/A		#NUM!		1												#DIV/0!	#DIV/0!	#DIV/0!	#DIV/0!	#DIV/0!	#DIV/0!	#DIV/0!	#DIV/0!	#DIV/0!	#DIV/0!
																						#DIV/0!	#N/A	#N/A		#NUM!		1												#DIV/0!	#DIV/0!	#DIV/0!	#DIV/0!	#DIV/0!	#DIV/0!	#DIV/0!	#DIV/0!	#DIV/0!	#DIV/0!
																						#DIV/0!	#N/A	#N/A		#NUM!		1												#DIV/0!	#DIV/0!	#DIV/0!	#DIV/0!	#DIV/0!	#DIV/0!	#DIV/0!	#DIV/0!	#DIV/0!	#DIV/0!
																						#DIV/0!	#N/A	#N/A		#NUM!		1												#DIV/0!	#DIV/0!	#DIV/0!	#DIV/0!	#DIV/0!	#DIV/0!	#DIV/0!	#DIV/0!	#DIV/0!	#DIV/0!
																						#DIV/0!	#N/A	#N/A		#NUM!		1												#DIV/0!	#DIV/0!	#DIV/0!	#DIV/0!	#DIV/0!	#DIV/0!	#DIV/0!	#DIV/0!	#DIV/0!	#DIV/0!
																						#DIV/0!	#N/A	#N/A		#NUM!		1												#DIV/0!	#DIV/0!	#DIV/0!	#DIV/0!	#DIV/0!	#DIV/0!	#DIV/0!	#DIV/0!	#DIV/0!	#DIV/0!
																						#DIV/0!	#N/A	#N/A		#NUM!		1
																						#DIV/0!	#N/A	#N/A		#NUM!		1												1/s	0	0	0	0	0	0	0	0	0
																						#DIV/0!	#N/A	#N/A		#NUM!		1											1	#N/A	#N/A	#N/A	#N/A	#N/A	#N/A	#N/A	#N/A	#N/A	#N/A
																						#DIV/0!	#N/A	#N/A		#NUM!		1											2	#N/A	#N/A	#N/A	#N/A	#N/A	#N/A	#N/A	#N/A	#N/A	#N/A
																						#DIV/0!	#N/A	#N/A		#NUM!		1											3	#N/A	#N/A	#N/A	#N/A	#N/A	#N/A	#N/A	#N/A	#N/A	#N/A
																						#DIV/0!	#N/A	#N/A		#NUM!		1											4	#N/A	#N/A	#N/A	#N/A	#N/A	#N/A	#N/A	#N/A	#N/A	#N/A
																						#DIV/0!	#N/A	#N/A		#NUM!		1											5	#N/A	#N/A	#N/A	#N/A	#N/A	#N/A	#N/A	#N/A	#N/A	#N/A
																						#DIV/0!	#N/A	#N/A		#NUM!		1											6	#N/A	#N/A	#N/A	#N/A	#N/A	#N/A	#N/A	#N/A	#N/A	#N/A
																						#DIV/0!	#N/A	#N/A		#NUM!		1											7	#N/A	#N/A	#N/A	#N/A	#N/A	#N/A	#N/A	#N/A	#N/A	#N/A
																						#DIV/0!	#N/A	#N/A		#NUM!		1											8	#N/A	#N/A	#N/A	#N/A	#N/A	#N/A	#N/A	#N/A	#N/A	#N/A
																						#DIV/0!	#N/A	#N/A		#NUM!		1											9	#N/A	#N/A	#N/A	#N/A	#N/A	#N/A	#N/A	#N/A	#N/A	#N/A
																						#DIV/0!	#N/A	#N/A		#NUM!		1											10	#N/A	#N/A	#N/A	#N/A	#N/A	#N/A	#N/A	#N/A	#N/A	#N/A
																						#DIV/0!	#N/A	#N/A		#NUM!		1											11	#N/A	#N/A	#N/A	#N/A	#N/A	#N/A	#N/A	#N/A	#N/A	#N/A
																						#DIV/0!	#N/A	#N/A		#NUM!		1											12	#N/A	#N/A	#N/A	#N/A	#N/A	#N/A	#N/A	#N/A	#N/A	#N/A
																						#DIV/0!	#N/A	#N/A		#NUM!		1											13	#N/A	#N/A	#N/A	#N/A	#N/A	#N/A	#N/A	#N/A	#N/A	#N/A
																						#DIV/0!	#N/A	#N/A		#NUM!		1											14	#N/A	#N/A	#N/A	#N/A	#N/A	#N/A	#N/A	#N/A	#N/A	#N/A
																						#DIV/0!	#N/A	#N/A		#NUM!		1											15	#N/A	#N/A	#N/A	#N/A	#N/A	#N/A	#N/A	#N/A	#N/A	#N/A
																						#DIV/0!	#N/A	#N/A		#NUM!		1
																						#DIV/0!	#N/A	#N/A		#NUM!		1
																						#DIV/0!	#N/A	#N/A		#NUM!		1
																						#DIV/0!	#N/A	#N/A		#NUM!		1
																						#DIV/0!	#N/A	#N/A		#NUM!		1
																						#DIV/0!	#N/A	#N/A		#NUM!		1
																						#DIV/0!	#N/A	#N/A		#NUM!		1
																						#DIV/0!	#N/A	#N/A		#NUM!		1
																						#DIV/0!	#N/A	#N/A		#NUM!		1
																						#DIV/0!	#N/A	#N/A		#NUM!		1
																						#DIV/0!	#N/A	#N/A		#NUM!		1
																						#DIV/0!	#N/A	#N/A		#NUM!		1
																						#DIV/0!	#N/A	#N/A		#NUM!		1
																						#DIV/0!	#N/A	#N/A		#NUM!		1
																						#DIV/0!	#N/A	#N/A		#NUM!		1
																						#DIV/0!	#N/A	#N/A		#NUM!		1
																						#DIV/0!	#N/A	#N/A		#NUM!		1
																						#DIV/0!	#N/A	#N/A		#NUM!		1
																						#DIV/0!	#N/A	#N/A		#NUM!		1
																						#DIV/0!	#N/A	#N/A		#NUM!		1
																						#DIV/0!	#N/A	#N/A		#NUM!		1
																						#DIV/0!	#N/A	#N/A		#NUM!		1
																						#DIV/0!	#N/A	#N/A		#NUM!		1
																						#DIV/0!	#N/A	#N/A		#NUM!		1
																						#DIV/0!	#N/A	#N/A		#NUM!		1
																						#DIV/0!	#N/A	#N/A		#NUM!		1
																						#DIV/0!	#N/A	#N/A		#NUM!		1
																						#DIV/0!	#N/A	#N/A		#NUM!		1
																						#DIV/0!	#N/A	#N/A		#NUM!		1
																						#DIV/0!	#N/A	#N/A		#NUM!		1
																						#DIV/0!	#N/A	#N/A		#NUM!		1
																						#DIV/0!	#N/A	#N/A		#NUM!		1
																						#DIV/0!	#N/A	#N/A		#NUM!		1
																						#DIV/0!	#N/A	#N/A		#NUM!		1
																						#DIV/0!	#N/A	#N/A		#NUM!		1
																						#DIV/0!	#N/A	#N/A		#NUM!		1
																						#DIV/0!	#N/A	#N/A		#NUM!		1
																						#DIV/0!	#N/A	#N/A		#NUM!		1
																						#DIV/0!	#N/A	#N/A		#NUM!		1
																						#DIV/0!	#N/A	#N/A		#NUM!		1
																						#DIV/0!	#N/A	#N/A		#NUM!		1
																						#DIV/0!	#N/A	#N/A		#NUM!		1
																						#DIV/0!	#N/A	#N/A		#NUM!		1
																						#DIV/0!	#N/A	#N/A		#NUM!		1
																						#DIV/0!	#N/A	#N/A		#NUM!		1
																						#DIV/0!	#N/A	#N/A		#NUM!		1
																						#DIV/0!	#N/A	#N/A		#NUM!		1
																						#DIV/0!	#N/A	#N/A		#NUM!		1
																						#DIV/0!	#N/A	#N/A		#NUM!		1
																						#DIV/0!	#N/A	#N/A		#NUM!		1
																						#DIV/0!	#N/A	#N/A		#NUM!		1
																						#DIV/0!	#N/A	#N/A		#NUM!		1
																						#DIV/0!	#N/A	#N/A		#NUM!		1
																						#DIV/0!	#N/A	#N/A		#NUM!		1
																						#DIV/0!	#N/A	#N/A		#NUM!		1
																						#DIV/0!	#N/A	#N/A		#NUM!		1
																						#DIV/0!	#N/A	#N/A		#NUM!		1
																						#DIV/0!	#N/A	#N/A		#NUM!		1
																						#DIV/0!	#N/A	#N/A		#NUM!		1
																						#DIV/0!	#N/A	#N/A		#NUM!		1
																						#DIV/0!	#N/A	#N/A		#NUM!		1
																						#DIV/0!	#N/A	#N/A		#NUM!		1
																						#DIV/0!	#N/A	#N/A		#NUM!		1
																						#DIV/0!	#N/A	#N/A		#NUM!		1
																						#DIV/0!	#N/A	#N/A		#NUM!		1
																						#DIV/0!	#N/A	#N/A		#NUM!		1
																						#DIV/0!	#N/A	#N/A		#NUM!		1
																						#DIV/0!	#N/A	#N/A		#NUM!		1
																						#DIV/0!	#N/A	#N/A		#NUM!		1
																						#DIV/0!	#N/A	#N/A		#NUM!		1
																						#DIV/0!	#N/A	#N/A		#NUM!		1
																						#DIV/0!	#N/A	#N/A		#NUM!		1
																						#DIV/0!	#N/A	#N/A		#NUM!		1
																						#DIV/0!	#N/A	#N/A		#NUM!		1
																						#DIV/0!	#N/A	#N/A		#NUM!		1
																						#DIV/0!	#N/A	#N/A		#NUM!		1
																						#DIV/0!	#N/A	#N/A		#NUM!		1
																						#DIV/0!	#N/A	#N/A		#NUM!		1
																						#DIV/0!	#N/A	#N/A		#NUM!		1
																						#DIV/0!	#N/A	#N/A		#NUM!		1
																						#DIV/0!	#N/A	#N/A		#NUM!		1
																						#DIV/0!	#N/A	#N/A		#NUM!		1
																						#DIV/0!	#N/A	#N/A		#NUM!		1
																						#DIV/0!	#N/A	#N/A		#NUM!		1
																						#DIV/0!	#N/A	#N/A		#NUM!		1
																						#DIV/0!	#N/A	#N/A		#NUM!		1
																						#DIV/0!	#N/A	#N/A		#NUM!		1
																						#DIV/0!	#N/A	#N/A		#NUM!		1
																						#DIV/0!	#N/A	#N/A		#NUM!		1
																						#DIV/0!	#N/A	#N/A		#NUM!		1
																						#DIV/0!	#N/A	#N/A		#NUM!		1
																						#DIV/0!	#N/A	#N/A		#NUM!		1
																						#DIV/0!	#N/A	#N/A		#NUM!		1
																						#DIV/0!	#N/A	#N/A		#NUM!		1
																						#DIV/0!	#N/A	#N/A		#NUM!		1
																						#DIV/0!	#N/A	#N/A		#NUM!		1
																						#DIV/0!	#N/A	#N/A		#NUM!		1
																						#DIV/0!	#N/A	#N/A		#NUM!		1
																						#DIV/0!	#N/A	#N/A		#NUM!		1
																						#DIV/0!	#N/A	#N/A		#NUM!		1
																						#DIV/0!	#N/A	#N/A		#NUM!		1
																						#DIV/0!	#N/A	#N/A		#NUM!		1
																						#DIV/0!	#N/A	#N/A		#NUM!		1
																						#DIV/0!	#N/A	#N/A		#NUM!		1
																						#DIV/0!	#N/A	#N/A		#NUM!		1
																						#DIV/0!	#N/A	#N/A		#NUM!		1
																						#DIV/0!	#N/A	#N/A		#NUM!		1
																						#DIV/0!	#N/A	#N/A		#NUM!		1
																						#DIV/0!	#N/A	#N/A		#NUM!		1
																						#DIV/0!	#N/A	#N/A		#NUM!		1
																						#DIV/0!	#N/A	#N/A		#NUM!		1
																						#DIV/0!	#N/A	#N/A		#NUM!		1
																						#DIV/0!	#N/A	#N/A		#NUM!		1
																						#DIV/0!	#N/A	#N/A		#NUM!		1
																						#DIV/0!	#N/A	#N/A		#NUM!		1
																						#DIV/0!	#N/A	#N/A		#NUM!		1
																						#DIV/0!	#N/A	#N/A		#NUM!		1
																						#DIV/0!	#N/A	#N/A		#NUM!		1
																						#DIV/0!	#N/A	#N/A		#NUM!		1
																						#DIV/0!	#N/A	#N/A		#NUM!		1
																						#DIV/0!	#N/A	#N/A		#NUM!		1
																						#DIV/0!	#N/A	#N/A		#NUM!		1
																						#DIV/0!	#N/A	#N/A		#NUM!		1
																						#DIV/0!	#N/A	#N/A		#NUM!		1
																						#DIV/0!	#N/A	#N/A		#NUM!		1
																						#DIV/0!	#N/A	#N/A		#NUM!		1
																						#DIV/0!	#N/A	#N/A		#NUM!		1
																						#DIV/0!	#N/A	#N/A		#NUM!		1
																						#DIV/0!	#N/A	#N/A		#NUM!		1
																						#DIV/0!	#N/A	#N/A		#NUM!		1
																						#DIV/0!	#N/A	#N/A		#NUM!		1
																						#DIV/0!	#N/A	#N/A		#NUM!		1
																						#DIV/0!	#N/A	#N/A		#NUM!		1
																						#DIV/0!	#N/A	#N/A		#NUM!		1
																						#DIV/0!	#N/A	#N/A		#NUM!		1
																						#DIV/0!	#N/A	#N/A		#NUM!		1
																						#DIV/0!	#N/A	#N/A		#NUM!		1
																						#DIV/0!	#N/A	#N/A		#NUM!		1
																						#DIV/0!	#N/A	#N/A		#NUM!		1
																						#DIV/0!	#N/A	#N/A		#NUM!		1
																						#DIV/0!	#N/A	#N/A		#NUM!		1
																						#DIV/0!	#N/A	#N/A		#NUM!		1
																						#DIV/0!	#N/A	#N/A		#NUM!		1
																						#DIV/0!	#N/A	#N/A		#NUM!		1
																						#DIV/0!	#N/A	#N/A		#NUM!		1
																						#DIV/0!	#N/A	#N/A		#NUM!		1
																						#DIV/0!	#N/A	#N/A		#NUM!		1
																						#DIV/0!	#N/A	#N/A		#NUM!		1
																						#DIV/0!	#N/A	#N/A		#NUM!		1
																						#DIV/0!	#N/A	#N/A		#NUM!		1
																						#DIV/0!	#N/A	#N/A		#NUM!		1
																						#DIV/0!	#N/A	#N/A		#NUM!		1
																						#DIV/0!	#N/A	#N/A		#NUM!		1
																						#DIV/0!	#N/A	#N/A		#NUM!		1
																						#DIV/0!	#N/A	#N/A		#NUM!		1
																						#DIV/0!	#N/A	#N/A		#NUM!		1
																						#DIV/0!	#N/A	#N/A		#NUM!		1
																						#DIV/0!	#N/A	#N/A		#NUM!		1
																						#DIV/0!	#N/A	#N/A		#NUM!		1
																						#DIV/0!	#N/A	#N/A		#NUM!		1
																						#DIV/0!	#N/A	#N/A		#NUM!		1
																						#DIV/0!	#N/A	#N/A		#NUM!		1
																						#DIV/0!	#N/A	#N/A		#NUM!		1
																						#DIV/0!	#N/A	#N/A		#NUM!		1
																						#DIV/0!	#N/A	#N/A		#NUM!		1
																						#DIV/0!	#N/A	#N/A		#NUM!		1
																						#DIV/0!	#N/A	#N/A		#NUM!		1
																						#DIV/0!	#N/A	#N/A		#NUM!		1
																						#DIV/0!	#N/A	#N/A		#NUM!		1
																						#DIV/0!	#N/A	#N/A		#NUM!		1
																						#DIV/0!	#N/A	#N/A		#NUM!		1
																						#DIV/0!	#N/A	#N/A		#NUM!		1
																						#DIV/0!	#N/A	#N/A		#NUM!		1
																						#DIV/0!	#N/A	#N/A		#NUM!		1
																						#DIV/0!	#N/A	#N/A		#NUM!		1
																						#DIV/0!	#N/A	#N/A		#NUM!		1
																						#DIV/0!	#N/A	#N/A		#NUM!		1
[truncated: 54 more columns]

## Sheet: Competitive
																							Calculated values
		No Inhibitor	[I]1	[I]2	[I]3	[I]4	[I]5	[I]6	[I]7	[I]8	[I]9	[I]10	[I]11	[I]12	[I]13	[I]14	[I]15						No Inhibitor	[I]1	[I]2	[I]3	[I]4	[I]5	[I]6	[I]7	[I]8	[I]9	[I]10	[I]11	[I]12	[I]13	[I]14	[I]15
		0	0	0	0	0	0	0	0	0	0	0	0	0	0	0	0		Km	Vmax	Ki		0	0	0	0	0	0	0	0	0	0	0	0	0	0	0	0
[S]1	0	0	0	0	0	0	0	0	0	0	0	0	0	0	0	0	0		#NUM!	#NUM!	#DIV/0!		#NUM!	#NUM!	#NUM!	#NUM!	#NUM!	#NUM!	#NUM!	#NUM!	#NUM!	#NUM!	#NUM!	#NUM!	#NUM!	#NUM!	#NUM!	#NUM!		0	0	0	0	0	0	0	0	0	0
[S]2	0	0	0	0	0	0	0	0	0	0	0	0	0	0	0	0	0						#NUM!	#NUM!	#NUM!	#NUM!	#NUM!	#NUM!	#NUM!	#NUM!	#NUM!	#NUM!	#NUM!	#NUM!	#NUM!	#NUM!	#NUM!	#NUM!		0	0	0	0	0	0	0	0	0	0
[S]3	0	0	0	0	0	0	0	0	0	0	0	0	0	0	0	0	0						#NUM!	#NUM!	#NUM!	#NUM!	#NUM!	#NUM!	#NUM!	#NUM!	#NUM!	#NUM!	#NUM!	#NUM!	#NUM!	#NUM!	#NUM!	#NUM!		0	0	0	0	0	0	0	0	0	0
[S]4	0	0	0	0	0	0	0	0	0	0	0	0	0	0	0	0	0						#NUM!	#NUM!	#NUM!	#NUM!	#NUM!	#NUM!	#NUM!	#NUM!	#NUM!	#NUM!	#NUM!	#NUM!	#NUM!	#NUM!	#NUM!	#NUM!		0	0	0	0	0	0	0	0	0	0
[S]5	0	0	0	0	0	0	0	0	0	0	0	0	0	0	0	0	0						#NUM!	#NUM!	#NUM!	#NUM!	#NUM!	#NUM!	#NUM!	#NUM!	#NUM!	#NUM!	#NUM!	#NUM!	#NUM!	#NUM!	#NUM!	#NUM!		0	0	0	0	0	0	0	0	0	0
[S]6	0	0	0	0	0	0	0	0	0	0	0	0	0	0	0	0	0			Sum R2	0		#NUM!	#NUM!	#NUM!	#NUM!	#NUM!	#NUM!	#NUM!	#NUM!	#NUM!	#NUM!	#NUM!	#NUM!	#NUM!	#NUM!	#NUM!	#NUM!		0	0	0	0	0	0	0	0	0	0
[S]7	0	0	0	0	0	0	0	0	0	0	0	0	0	0	0	0	0			Sum residuals %	0		#NUM!	#NUM!	#NUM!	#NUM!	#NUM!	#NUM!	#NUM!	#NUM!	#NUM!	#NUM!	#NUM!	#NUM!	#NUM!	#NUM!	#NUM!	#NUM!		0	0	0	0	0	0	0	0	0	0
[S]8	0	0	0	0	0	0	0	0	0	0	0	0	0	0	0	0	0						#NUM!	#NUM!	#NUM!	#NUM!	#NUM!	#NUM!	#NUM!	#NUM!	#NUM!	#NUM!	#NUM!	#NUM!	#NUM!	#NUM!	#NUM!	#NUM!		0	0	0	0	0	0	0	0	0	0
[S]9	0	0	0	0	0	0	0	0	0	0	0	0	0	0	0	0	0						#NUM!	#NUM!	#NUM!	#NUM!	#NUM!	#NUM!	#NUM!	#NUM!	#NUM!	#NUM!	#NUM!	#NUM!	#NUM!	#NUM!	#NUM!	#NUM!		0	0	0	0	0	0	0	0	0	0
[S]10	0	0	0	0	0	0	0	0	0	0	0	0	0	0	0	0	0						#NUM!	#NUM!	#NUM!	#NUM!	#NUM!	#NUM!	#NUM!	#NUM!	#NUM!	#NUM!	#NUM!	#NUM!	#NUM!	#NUM!	#NUM!	#NUM!		0	0	0	0	0	0	0	0	0	0
[S]11	0	0	0	0	0	0	0	0	0	0	0	0	0	0	0	0	0						#NUM!	#NUM!	#NUM!	#NUM!	#NUM!	#NUM!	#NUM!	#NUM!	#NUM!	#NUM!	#NUM!	#NUM!	#NUM!	#NUM!	#NUM!	#NUM!		0	0	0	0	0	0	0	0	0	0
[S]12	0	0	0	0	0	0	0	0	0	0	0	0	0	0	0	0	0						#NUM!	#NUM!	#NUM!	#NUM!	#NUM!	#NUM!	#NUM!	#NUM!	#NUM!	#NUM!	#NUM!	#NUM!	#NUM!	#NUM!	#NUM!	#NUM!		0	0	0	0	0	0	0	0	0	0
[S]13	0	0	0	0	0	0	0	0	0	0	0	0	0	0	0	0	0						#NUM!	#NUM!	#NUM!	#NUM!	#NUM!	#NUM!	#NUM!	#NUM!	#NUM!	#NUM!	#NUM!	#NUM!	#NUM!	#NUM!	#NUM!	#NUM!		0	0	0	0	0	0	0	0	0	0
[S]14	0	0	0	0	0	0	0	0	0	0	0	0	0	0	0	0	0						#NUM!	#NUM!	#NUM!	#NUM!	#NUM!	#NUM!	#NUM!	#NUM!	#NUM!	#NUM!	#NUM!	#NUM!	#NUM!	#NUM!	#NUM!	#NUM!		0	0	0	0	0	0	0	0	0	0
[S]15	0	0	0	0	0	0	0	0	0	0	0	0	0	0	0	0	0						#NUM!	#NUM!	#NUM!	#NUM!	#NUM!	#NUM!	#NUM!	#NUM!	#NUM!	#NUM!	#NUM!	#NUM!	#NUM!	#NUM!	#NUM!	#NUM!		0	0	0	0	0	0	0	0	0	0
	#DIV/0!	#DIV/0!	#DIV/0!	#DIV/0!	#DIV/0!	#DIV/0!	#DIV/0!	#DIV/0!	#DIV/0!	#DIV/0!	#DIV/0!	#DIV/0!	#DIV/0!	#DIV/0!	#DIV/0!	#DIV/0!	#DIV/0!																					#DIV/0!	#N/A	#N/A	#N/A	#N/A	#N/A	#N/A	#N/A	#N/A	#N/A	#N/A	#N/A
	#DIV/0!	#DIV/0!	#DIV/0!	#DIV/0!	#DIV/0!	#DIV/0!	#DIV/0!	#DIV/0!	#DIV/0!	#DIV/0!	#DIV/0!	#DIV/0!	#DIV/0!	#DIV/0!	#DIV/0!	#DIV/0!	#DIV/0!					#DIV/0!	#N/A	#N/A		#NUM!		2										#DIV/0!	#N/A	#N/A	#N/A	#N/A	#N/A	#N/A	#N/A	#N/A	#N/A	#N/A	#N/A
	#DIV/0!	#DIV/0!	#DIV/0!	#DIV/0!	#DIV/0!	#DIV/0!	#DIV/0!	#DIV/0!	#DIV/0!	#DIV/0!	#DIV/0!	#DIV/0!	#DIV/0!	#DIV/0!	#DIV/0!	#DIV/0!	#DIV/0!					#DIV/0!	#N/A	#N/A		#NUM!		2										#DIV/0!	#N/A	#N/A	#N/A	#N/A	#N/A	#N/A	#N/A	#N/A	#N/A	#N/A	#N/A
	#DIV/0!	#DIV/0!	#DIV/0!	#DIV/0!	#DIV/0!	#DIV/0!	#DIV/0!	#DIV/0!	#DIV/0!	#DIV/0!	#DIV/0!	#DIV/0!	#DIV/0!	#DIV/0!	#DIV/0!	#DIV/0!	#DIV/0!					#DIV/0!	#N/A	#N/A		#NUM!		2										#DIV/0!	#N/A	#N/A	#N/A	#N/A	#N/A	#N/A	#N/A	#N/A	#N/A	#N/A	#N/A
	#DIV/0!	#DIV/0!	#DIV/0!	#DIV/0!	#DIV/0!	#DIV/0!	#DIV/0!	#DIV/0!	#DIV/0!	#DIV/0!	#DIV/0!	#DIV/0!	#DIV/0!	#DIV/0!	#DIV/0!	#DIV/0!	#DIV/0!					#DIV/0!	#N/A	#N/A		#NUM!		2										#DIV/0!	#N/A	#N/A	#N/A	#N/A	#N/A	#N/A	#N/A	#N/A	#N/A	#N/A	#N/A
	#DIV/0!	#DIV/0!	#DIV/0!	#DIV/0!	#DIV/0!	#DIV/0!	#DIV/0!	#DIV/0!	#DIV/0!	#DIV/0!	#DIV/0!	#DIV/0!	#DIV/0!	#DIV/0!	#DIV/0!	#DIV/0!	#DIV/0!					#DIV/0!	#N/A	#N/A		#NUM!		2										#DIV/0!	#N/A	#N/A	#N/A	#N/A	#N/A	#N/A	#N/A	#N/A	#N/A	#N/A	#N/A
	#DIV/0!	#DIV/0!	#DIV/0!	#DIV/0!	#DIV/0!	#DIV/0!	#DIV/0!	#DIV/0!	#DIV/0!	#DIV/0!	#DIV/0!	#DIV/0!	#DIV/0!	#DIV/0!	#DIV/0!	#DIV/0!	#DIV/0!					#DIV/0!	#N/A	#N/A		#NUM!		2										#DIV/0!	#N/A	#N/A	#N/A	#N/A	#N/A	#N/A	#N/A	#N/A	#N/A	#N/A	#N/A
	#DIV/0!	#DIV/0!	#DIV/0!	#DIV/0!	#DIV/0!	#DIV/0!	#DIV/0!	#DIV/0!	#DIV/0!	#DIV/0!	#DIV/0!	#DIV/0!	#DIV/0!	#DIV/0!	#DIV/0!	#DIV/0!	#DIV/0!					#DIV/0!	#N/A	#N/A		#NUM!		2										#DIV/0!	#N/A	#N/A	#N/A	#N/A	#N/A	#N/A	#N/A	#N/A	#N/A	#N/A	#N/A
	#DIV/0!	#DIV/0!	#DIV/0!	#DIV/0!	#DIV/0!	#DIV/0!	#DIV/0!	#DIV/0!	#DIV/0!	#DIV/0!	#DIV/0!	#DIV/0!	#DIV/0!	#DIV/0!	#DIV/0!	#DIV/0!	#DIV/0!					#DIV/0!	#N/A	#N/A		#NUM!		2										#DIV/0!	#N/A	#N/A	#N/A	#N/A	#N/A	#N/A	#N/A	#N/A	#N/A	#N/A	#N/A
	#DIV/0!	#DIV/0!	#DIV/0!	#DIV/0!	#DIV/0!	#DIV/0!	#DIV/0!	#DIV/0!	#DIV/0!	#DIV/0!	#DIV/0!	#DIV/0!	#DIV/0!	#DIV/0!	#DIV/0!	#DIV/0!	#DIV/0!					#DIV/0!	#N/A	#N/A		#NUM!		2										#DIV/0!	#N/A	#N/A	#N/A	#N/A	#N/A	#N/A	#N/A	#N/A	#N/A	#N/A	#N/A
	#DIV/0!	#DIV/0!	#DIV/0!	#DIV/0!	#DIV/0!	#DIV/0!	#DIV/0!	#DIV/0!	#DIV/0!	#DIV/0!	#DIV/0!	#DIV/0!	#DIV/0!	#DIV/0!	#DIV/0!	#DIV/0!	#DIV/0!					#DIV/0!	#N/A	#N/A		#NUM!		2										#DIV/0!	#N/A	#N/A	#N/A	#N/A	#N/A	#N/A	#N/A	#N/A	#N/A	#N/A	#N/A
	#DIV/0!	#DIV/0!	#DIV/0!	#DIV/0!	#DIV/0!	#DIV/0!	#DIV/0!	#DIV/0!	#DIV/0!	#DIV/0!	#DIV/0!	#DIV/0!	#DIV/0!	#DIV/0!	#DIV/0!	#DIV/0!	#DIV/0!					#DIV/0!	#N/A	#N/A		#NUM!		2										#DIV/0!	#N/A	#N/A	#N/A	#N/A	#N/A	#N/A	#N/A	#N/A	#N/A	#N/A	#N/A
	#DIV/0!	#DIV/0!	#DIV/0!	#DIV/0!	#DIV/0!	#DIV/0!	#DIV/0!	#DIV/0!	#DIV/0!	#DIV/0!	#DIV/0!	#DIV/0!	#DIV/0!	#DIV/0!	#DIV/0!	#DIV/0!	#DIV/0!					#DIV/0!	#N/A	#N/A		#NUM!		2										#DIV/0!	#N/A	#N/A	#N/A	#N/A	#N/A	#N/A	#N/A	#N/A	#N/A	#N/A	#N/A
	#DIV/0!	#DIV/0!	#DIV/0!	#DIV/0!	#DIV/0!	#DIV/0!	#DIV/0!	#DIV/0!	#DIV/0!	#DIV/0!	#DIV/0!	#DIV/0!	#DIV/0!	#DIV/0!	#DIV/0!	#DIV/0!	#DIV/0!					#DIV/0!	#N/A	#N/A		#NUM!		2										#DIV/0!	#N/A	#N/A	#N/A	#N/A	#N/A	#N/A	#N/A	#N/A	#N/A	#N/A	#N/A
	#DIV/0!	#DIV/0!	#DIV/0!	#DIV/0!	#DIV/0!	#DIV/0!	#DIV/0!	#DIV/0!	#DIV/0!	#DIV/0!	#DIV/0!	#DIV/0!	#DIV/0!	#DIV/0!	#DIV/0!	#DIV/0!	#DIV/0!					#DIV/0!	#N/A	#N/A		#NUM!		2										#DIV/0!	#N/A	#N/A	#N/A	#N/A	#N/A	#N/A	#N/A	#N/A	#N/A	#N/A	#N/A
																						#DIV/0!	#N/A	#N/A		#NUM!		2
																						#DIV/0!	#N/A	#N/A		#NUM!		2											#N/A	#N/A	#N/A	#N/A	#N/A	#N/A	#N/A	#N/A	#N/A	#N/A	#N/A
																						#DIV/0!	#N/A	#N/A		#NUM!		2											#N/A	#N/A	#N/A	#N/A	#N/A	#N/A	#N/A	#N/A	#N/A	#N/A	#N/A
																						#DIV/0!	#N/A	#N/A		#NUM!		2											#N/A	#N/A	#N/A	#N/A	#N/A	#N/A	#N/A	#N/A	#N/A	#N/A	#N/A
																						#DIV/0!	#N/A	#N/A		#NUM!		2											#N/A	#N/A	#N/A	#N/A	#N/A	#N/A	#N/A	#N/A	#N/A	#N/A	#N/A
																						#DIV/0!	#N/A	#N/A		#NUM!		2											#N/A	#N/A	#N/A	#N/A	#N/A	#N/A	#N/A	#N/A	#N/A	#N/A	#N/A
																						#DIV/0!	#N/A	#N/A		#NUM!		2											#N/A	#N/A	#N/A	#N/A	#N/A	#N/A	#N/A	#N/A	#N/A	#N/A	#N/A
																						#DIV/0!	#N/A	#N/A		#NUM!		2											#N/A	#N/A	#N/A	#N/A	#N/A	#N/A	#N/A	#N/A	#N/A	#N/A	#N/A
																						#DIV/0!	#N/A	#N/A		#NUM!		2											#N/A	#N/A	#N/A	#N/A	#N/A	#N/A	#N/A	#N/A	#N/A	#N/A	#N/A
																						#DIV/0!	#N/A	#N/A		#NUM!		2											#N/A	#N/A	#N/A	#N/A	#N/A	#N/A	#N/A	#N/A	#N/A	#N/A	#N/A
																						#DIV/0!	#N/A	#N/A		#NUM!		2											#N/A	#N/A	#N/A	#N/A	#N/A	#N/A	#N/A	#N/A	#N/A	#N/A	#N/A
																						#DIV/0!	#N/A	#N/A		#NUM!		2											#N/A	#N/A	#N/A	#N/A	#N/A	#N/A	#N/A	#N/A	#N/A	#N/A	#N/A
																						#DIV/0!	#N/A	#N/A		#NUM!		2											#N/A	#N/A	#N/A	#N/A	#N/A	#N/A	#N/A	#N/A	#N/A	#N/A	#N/A
																						#DIV/0!	#N/A	#N/A		#NUM!		2											#N/A	#N/A	#N/A	#N/A	#N/A	#N/A	#N/A	#N/A	#N/A	#N/A	#N/A
																						#DIV/0!	#N/A	#N/A		#NUM!		2											#N/A	#N/A	#N/A	#N/A	#N/A	#N/A	#N/A	#N/A	#N/A	#N/A	#N/A
																						#DIV/0!	#N/A	#N/A		#NUM!		2											#N/A	#N/A	#N/A	#N/A	#N/A	#N/A	#N/A	#N/A	#N/A	#N/A	#N/A
																						#DIV/0!	#N/A	#N/A		#NUM!		2
																						#DIV/0!	#N/A	#N/A		#NUM!		2												#DIV/0!	#DIV/0!	#DIV/0!	#DIV/0!	#DIV/0!	#DIV/0!	#DIV/0!	#DIV/0!	#DIV/0!	#DIV/0!
																						#DIV/0!	#N/A	#N/A		#NUM!		2												#DIV/0!	#DIV/0!	#DIV/0!	#DIV/0!	#DIV/0!	#DIV/0!	#DIV/0!	#DIV/0!	#DIV/0!	#DIV/0!
																						#DIV/0!	#N/A	#N/A		#NUM!		2												#DIV/0!	#DIV/0!	#DIV/0!	#DIV/0!	#DIV/0!	#DIV/0!	#DIV/0!	#DIV/0!	#DIV/0!	#DIV/0!
																						#DIV/0!	#N/A	#N/A		#NUM!		2												#DIV/0!	#DIV/0!	#DIV/0!	#DIV/0!	#DIV/0!	#DIV/0!	#DIV/0!	#DIV/0!	#DIV/0!	#DIV/0!
																						#DIV/0!	#N/A	#N/A		#NUM!		2												#DIV/0!	#DIV/0!	#DIV/0!	#DIV/0!	#DIV/0!	#DIV/0!	#DIV/0!	#DIV/0!	#DIV/0!	#DIV/0!
																						#DIV/0!	#N/A	#N/A		#NUM!		2												#DIV/0!	#DIV/0!	#DIV/0!	#DIV/0!	#DIV/0!	#DIV/0!	#DIV/0!	#DIV/0!	#DIV/0!	#DIV/0!
																						#DIV/0!	#N/A	#N/A		#NUM!		2												#DIV/0!	#DIV/0!	#DIV/0!	#DIV/0!	#DIV/0!	#DIV/0!	#DIV/0!	#DIV/0!	#DIV/0!	#DIV/0!
																						#DIV/0!	#N/A	#N/A		#NUM!		2												#DIV/0!	#DIV/0!	#DIV/0!	#DIV/0!	#DIV/0!	#DIV/0!	#DIV/0!	#DIV/0!	#DIV/0!	#DIV/0!
																						#DIV/0!	#N/A	#N/A		#NUM!		2												#DIV/0!	#DIV/0!	#DIV/0!	#DIV/0!	#DIV/0!	#DIV/0!	#DIV/0!	#DIV/0!	#DIV/0!	#DIV/0!
																						#DIV/0!	#N/A	#N/A		#NUM!		2												#DIV/0!	#DIV/0!	#DIV/0!	#DIV/0!	#DIV/0!	#DIV/0!	#DIV/0!	#DIV/0!	#DIV/0!	#DIV/0!
																						#DIV/0!	#N/A	#N/A		#NUM!		2												#DIV/0!	#DIV/0!	#DIV/0!	#DIV/0!	#DIV/0!	#DIV/0!	#DIV/0!	#DIV/0!	#DIV/0!	#DIV/0!
																						#DIV/0!	#N/A	#N/A		#NUM!		2												#DIV/0!	#DIV/0!	#DIV/0!	#DIV/0!	#DIV/0!	#DIV/0!	#DIV/0!	#DIV/0!	#DIV/0!	#DIV/0!
																						#DIV/0!	#N/A	#N/A		#NUM!		2												#DIV/0!	#DIV/0!	#DIV/0!	#DIV/0!	#DIV/0!	#DIV/0!	#DIV/0!	#DIV/0!	#DIV/0!	#DIV/0!
																						#DIV/0!	#N/A	#N/A		#NUM!		2												#DIV/0!	#DIV/0!	#DIV/0!	#DIV/0!	#DIV/0!	#DIV/0!	#DIV/0!	#DIV/0!	#DIV/0!	#DIV/0!
																						#DIV/0!	#N/A	#N/A		#NUM!		2												#DIV/0!	#DIV/0!	#DIV/0!	#DIV/0!	#DIV/0!	#DIV/0!	#DIV/0!	#DIV/0!	#DIV/0!	#DIV/0!
																						#DIV/0!	#N/A	#N/A		#NUM!		2
																						#DIV/0!	#N/A	#N/A		#NUM!		2												1/s	0	0	0	0	0	0	0	0	0
																						#DIV/0!	#N/A	#N/A		#NUM!		2											1	#N/A	#N/A	#N/A	#N/A	#N/A	#N/A	#N/A	#N/A	#N/A	#N/A
																						#DIV/0!	#N/A	#N/A		#NUM!		2											2	#N/A	#N/A	#N/A	#N/A	#N/A	#N/A	#N/A	#N/A	#N/A	#N/A
																						#DIV/0!	#N/A	#N/A		#NUM!		2											3	#N/A	#N/A	#N/A	#N/A	#N/A	#N/A	#N/A	#N/A	#N/A	#N/A
																						#DIV/0!	#N/A	#N/A		#NUM!		2											4	#N/A	#N/A	#N/A	#N/A	#N/A	#N/A	#N/A	#N/A	#N/A	#N/A
																						#DIV/0!	#N/A	#N/A		#NUM!		2											5	#N/A	#N/A	#N/A	#N/A	#N/A	#N/A	#N/A	#N/A	#N/A	#N/A
																						#DIV/0!	#N/A	#N/A		#NUM!		2											6	#N/A	#N/A	#N/A	#N/A	#N/A	#N/A	#N/A	#N/A	#N/A	#N/A
																						#DIV/0!	#N/A	#N/A		#NUM!		2											7	#N/A	#N/A	#N/A	#N/A	#N/A	#N/A	#N/A	#N/A	#N/A	#N/A
																						#DIV/0!	#N/A	#N/A		#NUM!		2											8	#N/A	#N/A	#N/A	#N/A	#N/A	#N/A	#N/A	#N/A	#N/A	#N/A
																						#DIV/0!	#N/A	#N/A		#NUM!		2											9	#N/A	#N/A	#N/A	#N/A	#N/A	#N/A	#N/A	#N/A	#N/A	#N/A
																						#DIV/0!	#N/A	#N/A		#NUM!		2											10	#N/A	#N/A	#N/A	#N/A	#N/A	#N/A	#N/A	#N/A	#N/A	#N/A
																						#DIV/0!	#N/A	#N/A		#NUM!		2											11	#N/A	#N/A	#N/A	#N/A	#N/A	#N/A	#N/A	#N/A	#N/A	#N/A
																						#DIV/0!	#N/A	#N/A		#NUM!		2											12	#N/A	#N/A	#N/A	#N/A	#N/A	#N/A	#N/A	#N/A	#N/A	#N/A
																						#DIV/0!	#N/A	#N/A		#NUM!		2											13	#N/A	#N/A	#N/A	#N/A	#N/A	#N/A	#N/A	#N/A	#N/A	#N/A
																						#DIV/0!	#N/A	#N/A		#NUM!		2											14	#N/A	#N/A	#N/A	#N/A	#N/A	#N/A	#N/A	#N/A	#N/A	#N/A
																						#DIV/0!	#N/A	#N/A		#NUM!		2											15	#N/A	#N/A	#N/A	#N/A	#N/A	#N/A	#N/A	#N/A	#N/A	#N/A
																						#DIV/0!	#N/A	#N/A		#NUM!		2
																						#DIV/0!	#N/A	#N/A		#NUM!		2
																						#DIV/0!	#N/A	#N/A		#NUM!		2
																						#DIV/0!	#N/A	#N/A		#NUM!		2
																						#DIV/0!	#N/A	#N/A		#NUM!		2
																						#DIV/0!	#N/A	#N/A		#NUM!		2
																						#DIV/0!	#N/A	#N/A		#NUM!		2
																						#DIV/0!	#N/A	#N/A		#NUM!		2
																						#DIV/0!	#N/A	#N/A		#NUM!		2
																						#DIV/0!	#N/A	#N/A		#NUM!		2
																						#DIV/0!	#N/A	#N/A		#NUM!		2
																						#DIV/0!	#N/A	#N/A		#NUM!		2
																						#DIV/0!	#N/A	#N/A		#NUM!		2
																						#DIV/0!	#N/A	#N/A		#NUM!		2
																						#DIV/0!	#N/A	#N/A		#NUM!		2
																						#DIV/0!	#N/A	#N/A		#NUM!		2
																						#DIV/0!	#N/A	#N/A		#NUM!		2
																						#DIV/0!	#N/A	#N/A		#NUM!		2
																						#DIV/0!	#N/A	#N/A		#NUM!		2
																						#DIV/0!	#N/A	#N/A		#NUM!		2
																						#DIV/0!	#N/A	#N/A		#NUM!		2
																						#DIV/0!	#N/A	#N/A		#NUM!		2
																						#DIV/0!	#N/A	#N/A		#NUM!		2
																						#DIV/0!	#N/A	#N/A		#NUM!		2
																						#DIV/0!	#N/A	#N/A		#NUM!		2
																						#DIV/0!	#N/A	#N/A		#NUM!		2
																						#DIV/0!	#N/A	#N/A		#NUM!		2
																						#DIV/0!	#N/A	#N/A		#NUM!		2
																						#DIV/0!	#N/A	#N/A		#NUM!		2
																						#DIV/0!	#N/A	#N/A		#NUM!		2
																						#DIV/0!	#N/A	#N/A		#NUM!		2
																						#DIV/0!	#N/A	#N/A		#NUM!		2
																						#DIV/0!	#N/A	#N/A		#NUM!		2
																						#DIV/0!	#N/A	#N/A		#NUM!		2
																						#DIV/0!	#N/A	#N/A		#NUM!		2
																						#DIV/0!	#N/A	#N/A		#NUM!		2
																						#DIV/0!	#N/A	#N/A		#NUM!		2
																						#DIV/0!	#N/A	#N/A		#NUM!		2
																						#DIV/0!	#N/A	#N/A		#NUM!		2
																						#DIV/0!	#N/A	#N/A		#NUM!		2
																						#DIV/0!	#N/A	#N/A		#NUM!		2
																						#DIV/0!	#N/A	#N/A		#NUM!		2
																						#DIV/0!	#N/A	#N/A		#NUM!		2
																						#DIV/0!	#N/A	#N/A		#NUM!		2
																						#DIV/0!	#N/A	#N/A		#NUM!		2
																						#DIV/0!	#N/A	#N/A		#NUM!		2
																						#DIV/0!	#N/A	#N/A		#NUM!		2
																						#DIV/0!	#N/A	#N/A		#NUM!		2
																						#DIV/0!	#N/A	#N/A		#NUM!		2
																						#DIV/0!	#N/A	#N/A		#NUM!		2
																						#DIV/0!	#N/A	#N/A		#NUM!		2
																						#DIV/0!	#N/A	#N/A		#NUM!		2
																						#DIV/0!	#N/A	#N/A		#NUM!		2
																						#DIV/0!	#N/A	#N/A		#NUM!		2
																						#DIV/0!	#N/A	#N/A		#NUM!		2
																						#DIV/0!	#N/A	#N/A		#NUM!		2
																						#DIV/0!	#N/A	#N/A		#NUM!		2
																						#DIV/0!	#N/A	#N/A		#NUM!		2
																						#DIV/0!	#N/A	#N/A		#NUM!		2
																						#DIV/0!	#N/A	#N/A		#NUM!		2
																						#DIV/0!	#N/A	#N/A		#NUM!		2
																						#DIV/0!	#N/A	#N/A		#NUM!		2
																						#DIV/0!	#N/A	#N/A		#NUM!		2
																						#DIV/0!	#N/A	#N/A		#NUM!		2
																						#DIV/0!	#N/A	#N/A		#NUM!		2
																						#DIV/0!	#N/A	#N/A		#NUM!		2
																						#DIV/0!	#N/A	#N/A		#NUM!		2
																						#DIV/0!	#N/A	#N/A		#NUM!		2
																						#DIV/0!	#N/A	#N/A		#NUM!		2
																						#DIV/0!	#N/A	#N/A		#NUM!		2
																						#DIV/0!	#N/A	#N/A		#NUM!		2
																						#DIV/0!	#N/A	#N/A		#NUM!		2
																						#DIV/0!	#N/A	#N/A		#NUM!		2
																						#DIV/0!	#N/A	#N/A		#NUM!		2
																						#DIV/0!	#N/A	#N/A		#NUM!		2
																						#DIV/0!	#N/A	#N/A		#NUM!		2
																						#DIV/0!	#N/A	#N/A		#NUM!		2
																						#DIV/0!	#N/A	#N/A		#NUM!		2
																						#DIV/0!	#N/A	#N/A		#NUM!		2
																						#DIV/0!	#N/A	#N/A		#NUM!		2
																						#DIV/0!	#N/A	#N/A		#NUM!		2
																						#DIV/0!	#N/A	#N/A		#NUM!		2
																						#DIV/0!	#N/A	#N/A		#NUM!		2
																						#DIV/0!	#N/A	#N/A		#NUM!		2
																						#DIV/0!	#N/A	#N/A		#NUM!		2
																						#DIV/0!	#N/A	#N/A		#NUM!		2
																						#DIV/0!	#N/A	#N/A		#NUM!		2
																						#DIV/0!	#N/A	#N/A		#NUM!		2
																						#DIV/0!	#N/A	#N/A		#NUM!		2
																						#DIV/0!	#N/A	#N/A		#NUM!		2
																						#DIV/0!	#N/A	#N/A		#NUM!		2
																						#DIV/0!	#N/A	#N/A		#NUM!		2
																						#DIV/0!	#N/A	#N/A		#NUM!		2
																						#DIV/0!	#N/A	#N/A		#NUM!		2
																						#DIV/0!	#N/A	#N/A		#NUM!		2
																						#DIV/0!	#N/A	#N/A		#NUM!		2
																						#DIV/0!	#N/A	#N/A		#NUM!		2
																						#DIV/0!	#N/A	#N/A		#NUM!		2
																						#DIV/0!	#N/A	#N/A		#NUM!		2
																						#DIV/0!	#N/A	#N/A		#NUM!		2
																						#DIV/0!	#N/A	#N/A		#NUM!		2
																						#DIV/0!	#N/A	#N/A		#NUM!		2
																						#DIV/0!	#N/A	#N/A		#NUM!		2
																						#DIV/0!	#N/A	#N/A		#NUM!		2
																						#DIV/0!	#N/A	#N/A		#NUM!		2
																						#DIV/0!	#N/A	#N/A		#NUM!		2
																						#DIV/0!	#N/A	#N/A		#NUM!		2
																						#DIV/0!	#N/A	#N/A		#NUM!		2
																						#DIV/0!	#N/A	#N/A		#NUM!		2
																						#DIV/0!	#N/A	#N/A		#NUM!		2
																						#DIV/0!	#N/A	#N/A		#NUM!		2
																						#DIV/0!	#N/A	#N/A		#NUM!		2
																						#DIV/0!	#N/A	#N/A		#NUM!		2
																						#DIV/0!	#N/A	#N/A		#NUM!		2
																						#DIV/0!	#N/A	#N/A		#NUM!		2
																						#DIV/0!	#N/A	#N/A		#NUM!		2
																						#DIV/0!	#N/A	#N/A		#NUM!		2
																						#DIV/0!	#N/A	#N/A		#NUM!		2
																						#DIV/0!	#N/A	#N/A		#NUM!		2
																						#DIV/0!	#N/A	#N/A		#NUM!		2
																						#DIV/0!	#N/A	#N/A		#NUM!		2
																						#DIV/0!	#N/A	#N/A		#NUM!		2
																						#DIV/0!	#N/A	#N/A		#NUM!		2
																						#DIV/0!	#N/A	#N/A		#NUM!		2
																						#DIV/0!	#N/A	#N/A		#NUM!		2
																						#DIV/0!	#N/A	#N/A		#NUM!		2
																						#DIV/0!	#N/A	#N/A		#NUM!		2
																						#DIV/0!	#N/A	#N/A		#NUM!		2
																						#DIV/0!	#N/A	#N/A		#NUM!		2
																						#DIV/0!	#N/A	#N/A		#NUM!		2
																						#DIV/0!	#N/A	#N/A		#NUM!		2
																						#DIV/0!	#N/A	#N/A		#NUM!		2
																						#DIV/0!	#N/A	#N/A		#NUM!		2
																						#DIV/0!	#N/A	#N/A		#NUM!		2
																						#DIV/0!	#N/A	#N/A		#NUM!		2
																						#DIV/0!	#N/A	#N/A		#NUM!		2
																						#DIV/0!	#N/A	#N/A		#NUM!		2
																						#DIV/0!	#N/A	#N/A		#NUM!		2
																						#DIV/0!	#N/A	#N/A		#NUM!		2
																						#DIV/0!	#N/A	#N/A		#NUM!		2
																						#DIV/0!	#N/A	#N/A		#NUM!		2
																						#DIV/0!	#N/A	#N/A		#NUM!		2
																						#DIV/0!	#N/A	#N/A		#NUM!		2
																						#DIV/0!	#N/A	#N/A		#NUM!		2
																						#DIV/0!	#N/A	#N/A		#NUM!		2
																						#DIV/0!	#N/A	#N/A		#NUM!		2
																						#DIV/0!	#N/A	#N/A		#NUM!		2
																						#DIV/0!	#N/A	#N/A		#NUM!		2
																						#DIV/0!	#N/A	#N/A		#NUM!		2
																						#DIV/0!	#N/A	#N/A		#NUM!		2
																						#DIV/0!	#N/A	#N/A		#NUM!		2
																						#DIV/0!	#N/A	#N/A		#NUM!		2
																						#DIV/0!	#N/A	#N/A		#NUM!		2
																						#DIV/0!	#N/A	#N/A		#NUM!		2
																						#DIV/0!	#N/A	#N/A		#NUM!		2
																						#DIV/0!	#N/A	#N/A		#NUM!		2
																						#DIV/0!	#N/A	#N/A		#NUM!		2
																						#DIV/0!	#N/A	#N/A		#NUM!		2
																						#DIV/0!	#N/A	#N/A		#NUM!		2
																						#DIV/0!	#N/A	#N/A		#NUM!		2
																						#DIV/0!	#N/A	#N/A		#NUM!		2
																						#DIV/0!	#N/A	#N/A		#NUM!		2
																						#DIV/0!	#N/A	#N/A		#NUM!		2
																						#DIV/0!	#N/A	#N/A		#NUM!		2
																						#DIV/0!	#N/A	#N/A		#NUM!		2
																						#DIV/0!	#N/A	#N/A		#NUM!		2
																						#DIV/0!	#N/A	#N/A		#NUM!		2
																						#DIV/0!	#N/A	#N/A		#NUM!		2
																						#DIV/0!	#N/A	#N/A		#NUM!		2
																						#DIV/0!	#N/A	#N/A		#NUM!		2
																						#DIV/0!	#N/A	#N/A		#NUM!		2
																						#DIV/0!	#N/A	#N/A		#NUM!		2
																						#DIV/0!	#N/A	#N/A		#NUM!		2
																						#DIV/0!	#N/A	#N/A		#NUM!		2
																						#DIV/0!	#N/A	#N/A		#NUM!		2
																						#DIV/0!	#N/A	#N/A		#NUM!		2
																						#DIV/0!	#N/A	#N/A		#NUM!		2
[truncated: 54 more columns]

## Sheet: Uncompetitive
																							Calculated values
		No Inhibitor	[I]1	[I]2	[I]3	[I]4	[I]5	[I]6	[I]7	[I]8	[I]9	[I]10	[I]11	[I]12	[I]13	[I]14	[I]15						No Inhibitor	[I]1	[I]2	[I]3	[I]4	[I]5	[I]6	[I]7	[I]8	[I]9	[I]10	[I]11	[I]12	[I]13	[I]14	[I]15
		0	0	0	0	0	0	0	0	0	0	0	0	0	0	0	0		Km	Vmax	Ki		0	0	0	0	0	0	0	0	0	0	0	0	0	0	0	0
[S]1	0	0	0	0	0	0	0	0	0	0	0	0	0	0	0	0	0		#NUM!	#NUM!	#DIV/0!		#NUM!	#NUM!	#NUM!	#NUM!	#NUM!	#NUM!	#NUM!	#NUM!	#NUM!	#NUM!	#NUM!	#NUM!	#NUM!	#NUM!	#NUM!	#NUM!		0	0	0	0	0	0	0	0	0	0
[S]2	0	0	0	0	0	0	0	0	0	0	0	0	0	0	0	0	0						#NUM!	#NUM!	#NUM!	#NUM!	#NUM!	#NUM!	#NUM!	#NUM!	#NUM!	#NUM!	#NUM!	#NUM!	#NUM!	#NUM!	#NUM!	#NUM!		0	0	0	0	0	0	0	0	0	0
[S]3	0	0	0	0	0	0	0	0	0	0	0	0	0	0	0	0	0						#NUM!	#NUM!	#NUM!	#NUM!	#NUM!	#NUM!	#NUM!	#NUM!	#NUM!	#NUM!	#NUM!	#NUM!	#NUM!	#NUM!	#NUM!	#NUM!		0	0	0	0	0	0	0	0	0	0
[S]4	0	0	0	0	0	0	0	0	0	0	0	0	0	0	0	0	0						#NUM!	#NUM!	#NUM!	#NUM!	#NUM!	#NUM!	#NUM!	#NUM!	#NUM!	#NUM!	#NUM!	#NUM!	#NUM!	#NUM!	#NUM!	#NUM!		0	0	0	0	0	0	0	0	0	0
[S]5	0	0	0	0	0	0	0	0	0	0	0	0	0	0	0	0	0						#NUM!	#NUM!	#NUM!	#NUM!	#NUM!	#NUM!	#NUM!	#NUM!	#NUM!	#NUM!	#NUM!	#NUM!	#NUM!	#NUM!	#NUM!	#NUM!		0	0	0	0	0	0	0	0	0	0
[S]6	0	0	0	0	0	0	0	0	0	0	0	0	0	0	0	0	0			Sum R2	0		#NUM!	#NUM!	#NUM!	#NUM!	#NUM!	#NUM!	#NUM!	#NUM!	#NUM!	#NUM!	#NUM!	#NUM!	#NUM!	#NUM!	#NUM!	#NUM!		0	0	0	0	0	0	0	0	0	0
[S]7	0	0	0	0	0	0	0	0	0	0	0	0	0	0	0	0	0			Sum residuals %	0		#NUM!	#NUM!	#NUM!	#NUM!	#NUM!	#NUM!	#NUM!	#NUM!	#NUM!	#NUM!	#NUM!	#NUM!	#NUM!	#NUM!	#NUM!	#NUM!		0	0	0	0	0	0	0	0	0	0
[S]8	0	0	0	0	0	0	0	0	0	0	0	0	0	0	0	0	0						#NUM!	#NUM!	#NUM!	#NUM!	#NUM!	#NUM!	#NUM!	#NUM!	#NUM!	#NUM!	#NUM!	#NUM!	#NUM!	#NUM!	#NUM!	#NUM!		0	0	0	0	0	0	0	0	0	0
[S]9	0	0	0	0	0	0	0	0	0	0	0	0	0	0	0	0	0						#NUM!	#NUM!	#NUM!	#NUM!	#NUM!	#NUM!	#NUM!	#NUM!	#NUM!	#NUM!	#NUM!	#NUM!	#NUM!	#NUM!	#NUM!	#NUM!		0	0	0	0	0	0	0	0	0	0
[S]10	0	0	0	0	0	0	0	0	0	0	0	0	0	0	0	0	0						#NUM!	#NUM!	#NUM!	#NUM!	#NUM!	#NUM!	#NUM!	#NUM!	#NUM!	#NUM!	#NUM!	#NUM!	#NUM!	#NUM!	#NUM!	#NUM!		0	0	0	0	0	0	0	0	0	0
[S]11	0	0	0	0	0	0	0	0	0	0	0	0	0	0	0	0	0						#NUM!	#NUM!	#NUM!	#NUM!	#NUM!	#NUM!	#NUM!	#NUM!	#NUM!	#NUM!	#NUM!	#NUM!	#NUM!	#NUM!	#NUM!	#NUM!		0	0	0	0	0	0	0	0	0	0
[S]12	0	0	0	0	0	0	0	0	0	0	0	0	0	0	0	0	0						#NUM!	#NUM!	#NUM!	#NUM!	#NUM!	#NUM!	#NUM!	#NUM!	#NUM!	#NUM!	#NUM!	#NUM!	#NUM!	#NUM!	#NUM!	#NUM!		0	0	0	0	0	0	0	0	0	0
[S]13	0	0	0	0	0	0	0	0	0	0	0	0	0	0	0	0	0						#NUM!	#NUM!	#NUM!	#NUM!	#NUM!	#NUM!	#NUM!	#NUM!	#NUM!	#NUM!	#NUM!	#NUM!	#NUM!	#NUM!	#NUM!	#NUM!		0	0	0	0	0	0	0	0	0	0
[S]14	0	0	0	0	0	0	0	0	0	0	0	0	0	0	0	0	0						#NUM!	#NUM!	#NUM!	#NUM!	#NUM!	#NUM!	#NUM!	#NUM!	#NUM!	#NUM!	#NUM!	#NUM!	#NUM!	#NUM!	#NUM!	#NUM!		0	0	0	0	0	0	0	0	0	0
[S]15	0	0	0	0	0	0	0	0	0	0	0	0	0	0	0	0	0						#NUM!	#NUM!	#NUM!	#NUM!	#NUM!	#NUM!	#NUM!	#NUM!	#NUM!	#NUM!	#NUM!	#NUM!	#NUM!	#NUM!	#NUM!	#NUM!		0	0	0	0	0	0	0	0	0	0
	#DIV/0!	#DIV/0!	#DIV/0!	#DIV/0!	#DIV/0!	#DIV/0!	#DIV/0!	#DIV/0!	#DIV/0!	#DIV/0!	#DIV/0!	#DIV/0!	#DIV/0!	#DIV/0!	#DIV/0!	#DIV/0!	#DIV/0!																					#DIV/0!	#N/A	#N/A	#N/A	#N/A	#N/A	#N/A	#N/A	#N/A	#N/A	#N/A	#N/A
	#DIV/0!	#DIV/0!	#DIV/0!	#DIV/0!	#DIV/0!	#DIV/0!	#DIV/0!	#DIV/0!	#DIV/0!	#DIV/0!	#DIV/0!	#DIV/0!	#DIV/0!	#DIV/0!	#DIV/0!	#DIV/0!	#DIV/0!					#DIV/0!	#N/A	#N/A		#NUM!		3										#DIV/0!	#N/A	#N/A	#N/A	#N/A	#N/A	#N/A	#N/A	#N/A	#N/A	#N/A	#N/A
	#DIV/0!	#DIV/0!	#DIV/0!	#DIV/0!	#DIV/0!	#DIV/0!	#DIV/0!	#DIV/0!	#DIV/0!	#DIV/0!	#DIV/0!	#DIV/0!	#DIV/0!	#DIV/0!	#DIV/0!	#DIV/0!	#DIV/0!					#DIV/0!	#N/A	#N/A		#NUM!		3										#DIV/0!	#N/A	#N/A	#N/A	#N/A	#N/A	#N/A	#N/A	#N/A	#N/A	#N/A	#N/A
	#DIV/0!	#DIV/0!	#DIV/0!	#DIV/0!	#DIV/0!	#DIV/0!	#DIV/0!	#DIV/0!	#DIV/0!	#DIV/0!	#DIV/0!	#DIV/0!	#DIV/0!	#DIV/0!	#DIV/0!	#DIV/0!	#DIV/0!					#DIV/0!	#N/A	#N/A		#NUM!		3										#DIV/0!	#N/A	#N/A	#N/A	#N/A	#N/A	#N/A	#N/A	#N/A	#N/A	#N/A	#N/A
	#DIV/0!	#DIV/0!	#DIV/0!	#DIV/0!	#DIV/0!	#DIV/0!	#DIV/0!	#DIV/0!	#DIV/0!	#DIV/0!	#DIV/0!	#DIV/0!	#DIV/0!	#DIV/0!	#DIV/0!	#DIV/0!	#DIV/0!					#DIV/0!	#N/A	#N/A		#NUM!		3										#DIV/0!	#N/A	#N/A	#N/A	#N/A	#N/A	#N/A	#N/A	#N/A	#N/A	#N/A	#N/A
	#DIV/0!	#DIV/0!	#DIV/0!	#DIV/0!	#DIV/0!	#DIV/0!	#DIV/0!	#DIV/0!	#DIV/0!	#DIV/0!	#DIV/0!	#DIV/0!	#DIV/0!	#DIV/0!	#DIV/0!	#DIV/0!	#DIV/0!					#DIV/0!	#N/A	#N/A		#NUM!		3										#DIV/0!	#N/A	#N/A	#N/A	#N/A	#N/A	#N/A	#N/A	#N/A	#N/A	#N/A	#N/A
	#DIV/0!	#DIV/0!	#DIV/0!	#DIV/0!	#DIV/0!	#DIV/0!	#DIV/0!	#DIV/0!	#DIV/0!	#DIV/0!	#DIV/0!	#DIV/0!	#DIV/0!	#DIV/0!	#DIV/0!	#DIV/0!	#DIV/0!					#DIV/0!	#N/A	#N/A		#NUM!		3										#DIV/0!	#N/A	#N/A	#N/A	#N/A	#N/A	#N/A	#N/A	#N/A	#N/A	#N/A	#N/A
	#DIV/0!	#DIV/0!	#DIV/0!	#DIV/0!	#DIV/0!	#DIV/0!	#DIV/0!	#DIV/0!	#DIV/0!	#DIV/0!	#DIV/0!	#DIV/0!	#DIV/0!	#DIV/0!	#DIV/0!	#DIV/0!	#DIV/0!					#DIV/0!	#N/A	#N/A		#NUM!		3										#DIV/0!	#N/A	#N/A	#N/A	#N/A	#N/A	#N/A	#N/A	#N/A	#N/A	#N/A	#N/A
	#DIV/0!	#DIV/0!	#DIV/0!	#DIV/0!	#DIV/0!	#DIV/0!	#DIV/0!	#DIV/0!	#DIV/0!	#DIV/0!	#DIV/0!	#DIV/0!	#DIV/0!	#DIV/0!	#DIV/0!	#DIV/0!	#DIV/0!					#DIV/0!	#N/A	#N/A		#NUM!		3										#DIV/0!	#N/A	#N/A	#N/A	#N/A	#N/A	#N/A	#N/A	#N/A	#N/A	#N/A	#N/A
	#DIV/0!	#DIV/0!	#DIV/0!	#DIV/0!	#DIV/0!	#DIV/0!	#DIV/0!	#DIV/0!	#DIV/0!	#DIV/0!	#DIV/0!	#DIV/0!	#DIV/0!	#DIV/0!	#DIV/0!	#DIV/0!	#DIV/0!					#DIV/0!	#N/A	#N/A		#NUM!		3										#DIV/0!	#N/A	#N/A	#N/A	#N/A	#N/A	#N/A	#N/A	#N/A	#N/A	#N/A	#N/A
	#DIV/0!	#DIV/0!	#DIV/0!	#DIV/0!	#DIV/0!	#DIV/0!	#DIV/0!	#DIV/0!	#DIV/0!	#DIV/0!	#DIV/0!	#DIV/0!	#DIV/0!	#DIV/0!	#DIV/0!	#DIV/0!	#DIV/0!					#DIV/0!	#N/A	#N/A		#NUM!		3										#DIV/0!	#N/A	#N/A	#N/A	#N/A	#N/A	#N/A	#N/A	#N/A	#N/A	#N/A	#N/A
	#DIV/0!	#DIV/0!	#DIV/0!	#DIV/0!	#DIV/0!	#DIV/0!	#DIV/0!	#DIV/0!	#DIV/0!	#DIV/0!	#DIV/0!	#DIV/0!	#DIV/0!	#DIV/0!	#DIV/0!	#DIV/0!	#DIV/0!					#DIV/0!	#N/A	#N/A		#NUM!		3										#DIV/0!	#N/A	#N/A	#N/A	#N/A	#N/A	#N/A	#N/A	#N/A	#N/A	#N/A	#N/A
	#DIV/0!	#DIV/0!	#DIV/0!	#DIV/0!	#DIV/0!	#DIV/0!	#DIV/0!	#DIV/0!	#DIV/0!	#DIV/0!	#DIV/0!	#DIV/0!	#DIV/0!	#DIV/0!	#DIV/0!	#DIV/0!	#DIV/0!					#DIV/0!	#N/A	#N/A		#NUM!		3										#DIV/0!	#N/A	#N/A	#N/A	#N/A	#N/A	#N/A	#N/A	#N/A	#N/A	#N/A	#N/A
	#DIV/0!	#DIV/0!	#DIV/0!	#DIV/0!	#DIV/0!	#DIV/0!	#DIV/0!	#DIV/0!	#DIV/0!	#DIV/0!	#DIV/0!	#DIV/0!	#DIV/0!	#DIV/0!	#DIV/0!	#DIV/0!	#DIV/0!					#DIV/0!	#N/A	#N/A		#NUM!		3										#DIV/0!	#N/A	#N/A	#N/A	#N/A	#N/A	#N/A	#N/A	#N/A	#N/A	#N/A	#N/A
	#DIV/0!	#DIV/0!	#DIV/0!	#DIV/0!	#DIV/0!	#DIV/0!	#DIV/0!	#DIV/0!	#DIV/0!	#DIV/0!	#DIV/0!	#DIV/0!	#DIV/0!	#DIV/0!	#DIV/0!	#DIV/0!	#DIV/0!					#DIV/0!	#N/A	#N/A		#NUM!		3										#DIV/0!	#N/A	#N/A	#N/A	#N/A	#N/A	#N/A	#N/A	#N/A	#N/A	#N/A	#N/A
																						#DIV/0!	#N/A	#N/A		#NUM!		3
																						#DIV/0!	#N/A	#N/A		#NUM!		3											#N/A	#N/A	#N/A	#N/A	#N/A	#N/A	#N/A	#N/A	#N/A	#N/A	#N/A
																						#DIV/0!	#N/A	#N/A		#NUM!		3											#N/A	#N/A	#N/A	#N/A	#N/A	#N/A	#N/A	#N/A	#N/A	#N/A	#N/A
																						#DIV/0!	#N/A	#N/A		#NUM!		3											#N/A	#N/A	#N/A	#N/A	#N/A	#N/A	#N/A	#N/A	#N/A	#N/A	#N/A
																						#DIV/0!	#N/A	#N/A		#NUM!		3											#N/A	#N/A	#N/A	#N/A	#N/A	#N/A	#N/A	#N/A	#N/A	#N/A	#N/A
																						#DIV/0!	#N/A	#N/A		#NUM!		3											#N/A	#N/A	#N/A	#N/A	#N/A	#N/A	#N/A	#N/A	#N/A	#N/A	#N/A
																						#DIV/0!	#N/A	#N/A		#NUM!		3											#N/A	#N/A	#N/A	#N/A	#N/A	#N/A	#N/A	#N/A	#N/A	#N/A	#N/A
																						#DIV/0!	#N/A	#N/A		#NUM!		3											#N/A	#N/A	#N/A	#N/A	#N/A	#N/A	#N/A	#N/A	#N/A	#N/A	#N/A
																						#DIV/0!	#N/A	#N/A		#NUM!		3											#N/A	#N/A	#N/A	#N/A	#N/A	#N/A	#N/A	#N/A	#N/A	#N/A	#N/A
																						#DIV/0!	#N/A	#N/A		#NUM!		3											#N/A	#N/A	#N/A	#N/A	#N/A	#N/A	#N/A	#N/A	#N/A	#N/A	#N/A
																						#DIV/0!	#N/A	#N/A		#NUM!		3											#N/A	#N/A	#N/A	#N/A	#N/A	#N/A	#N/A	#N/A	#N/A	#N/A	#N/A
																						#DIV/0!	#N/A	#N/A		#NUM!		3											#N/A	#N/A	#N/A	#N/A	#N/A	#N/A	#N/A	#N/A	#N/A	#N/A	#N/A
																						#DIV/0!	#N/A	#N/A		#NUM!		3											#N/A	#N/A	#N/A	#N/A	#N/A	#N/A	#N/A	#N/A	#N/A	#N/A	#N/A
																						#DIV/0!	#N/A	#N/A		#NUM!		3											#N/A	#N/A	#N/A	#N/A	#N/A	#N/A	#N/A	#N/A	#N/A	#N/A	#N/A
																						#DIV/0!	#N/A	#N/A		#NUM!		3											#N/A	#N/A	#N/A	#N/A	#N/A	#N/A	#N/A	#N/A	#N/A	#N/A	#N/A
																						#DIV/0!	#N/A	#N/A		#NUM!		3											#N/A	#N/A	#N/A	#N/A	#N/A	#N/A	#N/A	#N/A	#N/A	#N/A	#N/A
																						#DIV/0!	#N/A	#N/A		#NUM!		3
																						#DIV/0!	#N/A	#N/A		#NUM!		3												#DIV/0!	#DIV/0!	#DIV/0!	#DIV/0!	#DIV/0!	#DIV/0!	#DIV/0!	#DIV/0!	#DIV/0!	#DIV/0!
																						#DIV/0!	#N/A	#N/A		#NUM!		3												#DIV/0!	#DIV/0!	#DIV/0!	#DIV/0!	#DIV/0!	#DIV/0!	#DIV/0!	#DIV/0!	#DIV/0!	#DIV/0!
																						#DIV/0!	#N/A	#N/A		#NUM!		3												#DIV/0!	#DIV/0!	#DIV/0!	#DIV/0!	#DIV/0!	#DIV/0!	#DIV/0!	#DIV/0!	#DIV/0!	#DIV/0!
																						#DIV/0!	#N/A	#N/A		#NUM!		3												#DIV/0!	#DIV/0!	#DIV/0!	#DIV/0!	#DIV/0!	#DIV/0!	#DIV/0!	#DIV/0!	#DIV/0!	#DIV/0!
																						#DIV/0!	#N/A	#N/A		#NUM!		3												#DIV/0!	#DIV/0!	#DIV/0!	#DIV/0!	#DIV/0!	#DIV/0!	#DIV/0!	#DIV/0!	#DIV/0!	#DIV/0!
																						#DIV/0!	#N/A	#N/A		#NUM!		3												#DIV/0!	#DIV/0!	#DIV/0!	#DIV/0!	#DIV/0!	#DIV/0!	#DIV/0!	#DIV/0!	#DIV/0!	#DIV/0!
																						#DIV/0!	#N/A	#N/A		#NUM!		3												#DIV/0!	#DIV/0!	#DIV/0!	#DIV/0!	#DIV/0!	#DIV/0!	#DIV/0!	#DIV/0!	#DIV/0!	#DIV/0!
																						#DIV/0!	#N/A	#N/A		#NUM!		3												#DIV/0!	#DIV/0!	#DIV/0!	#DIV/0!	#DIV/0!	#DIV/0!	#DIV/0!	#DIV/0!	#DIV/0!	#DIV/0!
																						#DIV/0!	#N/A	#N/A		#NUM!		3												#DIV/0!	#DIV/0!	#DIV/0!	#DIV/0!	#DIV/0!	#DIV/0!	#DIV/0!	#DIV/0!	#DIV/0!	#DIV/0!
																						#DIV/0!	#N/A	#N/A		#NUM!		3												#DIV/0!	#DIV/0!	#DIV/0!	#DIV/0!	#DIV/0!	#DIV/0!	#DIV/0!	#DIV/0!	#DIV/0!	#DIV/0!
																						#DIV/0!	#N/A	#N/A		#NUM!		3												#DIV/0!	#DIV/0!	#DIV/0!	#DIV/0!	#DIV/0!	#DIV/0!	#DIV/0!	#DIV/0!	#DIV/0!	#DIV/0!
																						#DIV/0!	#N/A	#N/A		#NUM!		3												#DIV/0!	#DIV/0!	#DIV/0!	#DIV/0!	#DIV/0!	#DIV/0!	#DIV/0!	#DIV/0!	#DIV/0!	#DIV/0!
																						#DIV/0!	#N/A	#N/A		#NUM!		3												#DIV/0!	#DIV/0!	#DIV/0!	#DIV/0!	#DIV/0!	#DIV/0!	#DIV/0!	#DIV/0!	#DIV/0!	#DIV/0!
																						#DIV/0!	#N/A	#N/A		#NUM!		3												#DIV/0!	#DIV/0!	#DIV/0!	#DIV/0!	#DIV/0!	#DIV/0!	#DIV/0!	#DIV/0!	#DIV/0!	#DIV/0!
																						#DIV/0!	#N/A	#N/A		#NUM!		3												#DIV/0!	#DIV/0!	#DIV/0!	#DIV/0!	#DIV/0!	#DIV/0!	#DIV/0!	#DIV/0!	#DIV/0!	#DIV/0!
																						#DIV/0!	#N/A	#N/A		#NUM!		3
																						#DIV/0!	#N/A	#N/A		#NUM!		3												1/s	0	0	0	0	0	0	0	0	0
																						#DIV/0!	#N/A	#N/A		#NUM!		3											1	#N/A	#N/A	#N/A	#N/A	#N/A	#N/A	#N/A	#N/A	#N/A	#N/A
																						#DIV/0!	#N/A	#N/A		#NUM!		3											2	#N/A	#N/A	#N/A	#N/A	#N/A	#N/A	#N/A	#N/A	#N/A	#N/A
																						#DIV/0!	#N/A	#N/A		#NUM!		3											3	#N/A	#N/A	#N/A	#N/A	#N/A	#N/A	#N/A	#N/A	#N/A	#N/A
																						#DIV/0!	#N/A	#N/A		#NUM!		3											4	#N/A	#N/A	#N/A	#N/A	#N/A	#N/A	#N/A	#N/A	#N/A	#N/A
																						#DIV/0!	#N/A	#N/A		#NUM!		3											5	#N/A	#N/A	#N/A	#N/A	#N/A	#N/A	#N/A	#N/A	#N/A	#N/A
																						#DIV/0!	#N/A	#N/A		#NUM!		3											6	#N/A	#N/A	#N/A	#N/A	#N/A	#N/A	#N/A	#N/A	#N/A	#N/A
																						#DIV/0!	#N/A	#N/A		#NUM!		3											7	#N/A	#N/A	#N/A	#N/A	#N/A	#N/A	#N/A	#N/A	#N/A	#N/A
																						#DIV/0!	#N/A	#N/A		#NUM!		3											8	#N/A	#N/A	#N/A	#N/A	#N/A	#N/A	#N/A	#N/A	#N/A	#N/A
																						#DIV/0!	#N/A	#N/A		#NUM!		3											9	#N/A	#N/A	#N/A	#N/A	#N/A	#N/A	#N/A	#N/A	#N/A	#N/A
																						#DIV/0!	#N/A	#N/A		#NUM!		3											10	#N/A	#N/A	#N/A	#N/A	#N/A	#N/A	#N/A	#N/A	#N/A	#N/A
																						#DIV/0!	#N/A	#N/A		#NUM!		3											11	#N/A	#N/A	#N/A	#N/A	#N/A	#N/A	#N/A	#N/A	#N/A	#N/A
																						#DIV/0!	#N/A	#N/A		#NUM!		3											12	#N/A	#N/A	#N/A	#N/A	#N/A	#N/A	#N/A	#N/A	#N/A	#N/A
																						#DIV/0!	#N/A	#N/A		#NUM!		3											13	#N/A	#N/A	#N/A	#N/A	#N/A	#N/A	#N/A	#N/A	#N/A	#N/A
																						#DIV/0!	#N/A	#N/A		#NUM!		3											14	#N/A	#N/A	#N/A	#N/A	#N/A	#N/A	#N/A	#N/A	#N/A	#N/A
																						#DIV/0!	#N/A	#N/A		#NUM!		3											15	#N/A	#N/A	#N/A	#N/A	#N/A	#N/A	#N/A	#N/A	#N/A	#N/A
																						#DIV/0!	#N/A	#N/A		#NUM!		3
																						#DIV/0!	#N/A	#N/A		#NUM!		3
																						#DIV/0!	#N/A	#N/A		#NUM!		3
																						#DIV/0!	#N/A	#N/A		#NUM!		3
																						#DIV/0!	#N/A	#N/A		#NUM!		3
																						#DIV/0!	#N/A	#N/A		#NUM!		3
																						#DIV/0!	#N/A	#N/A		#NUM!		3
																						#DIV/0!	#N/A	#N/A		#NUM!		3
																						#DIV/0!	#N/A	#N/A		#NUM!		3
																						#DIV/0!	#N/A	#N/A		#NUM!		3
																						#DIV/0!	#N/A	#N/A		#NUM!		3
																						#DIV/0!	#N/A	#N/A		#NUM!		3
																						#DIV/0!	#N/A	#N/A		#NUM!		3
																						#DIV/0!	#N/A	#N/A		#NUM!		3
																						#DIV/0!	#N/A	#N/A		#NUM!		3
																						#DIV/0!	#N/A	#N/A		#NUM!		3
																						#DIV/0!	#N/A	#N/A		#NUM!		3
																						#DIV/0!	#N/A	#N/A		#NUM!		3
																						#DIV/0!	#N/A	#N/A		#NUM!		3
																						#DIV/0!	#N/A	#N/A		#NUM!		3
																						#DIV/0!	#N/A	#N/A		#NUM!		3
																						#DIV/0!	#N/A	#N/A		#NUM!		3
																						#DIV/0!	#N/A	#N/A		#NUM!		3
																						#DIV/0!	#N/A	#N/A		#NUM!		3
																						#DIV/0!	#N/A	#N/A		#NUM!		3
																						#DIV/0!	#N/A	#N/A		#NUM!		3
																						#DIV/0!	#N/A	#N/A		#NUM!		3
																						#DIV/0!	#N/A	#N/A		#NUM!		3
																						#DIV/0!	#N/A	#N/A		#NUM!		3
																						#DIV/0!	#N/A	#N/A		#NUM!		3
																						#DIV/0!	#N/A	#N/A		#NUM!		3
																						#DIV/0!	#N/A	#N/A		#NUM!		3
																						#DIV/0!	#N/A	#N/A		#NUM!		3
																						#DIV/0!	#N/A	#N/A		#NUM!		3
																						#DIV/0!	#N/A	#N/A		#NUM!		3
																						#DIV/0!	#N/A	#N/A		#NUM!		3
																						#DIV/0!	#N/A	#N/A		#NUM!		3
																						#DIV/0!	#N/A	#N/A		#NUM!		3
																						#DIV/0!	#N/A	#N/A		#NUM!		3
																						#DIV/0!	#N/A	#N/A		#NUM!		3
																						#DIV/0!	#N/A	#N/A		#NUM!		3
																						#DIV/0!	#N/A	#N/A		#NUM!		3
																						#DIV/0!	#N/A	#N/A		#NUM!		3
																						#DIV/0!	#N/A	#N/A		#NUM!		3
																						#DIV/0!	#N/A	#N/A		#NUM!		3
																						#DIV/0!	#N/A	#N/A		#NUM!		3
																						#DIV/0!	#N/A	#N/A		#NUM!		3
																						#DIV/0!	#N/A	#N/A		#NUM!		3
																						#DIV/0!	#N/A	#N/A		#NUM!		3
																						#DIV/0!	#N/A	#N/A		#NUM!		3
																						#DIV/0!	#N/A	#N/A		#NUM!		3
																						#DIV/0!	#N/A	#N/A		#NUM!		3
																						#DIV/0!	#N/A	#N/A		#NUM!		3
																						#DIV/0!	#N/A	#N/A		#NUM!		3
																						#DIV/0!	#N/A	#N/A		#NUM!		3
																						#DIV/0!	#N/A	#N/A		#NUM!		3
																						#DIV/0!	#N/A	#N/A		#NUM!		3
																						#DIV/0!	#N/A	#N/A		#NUM!		3
																						#DIV/0!	#N/A	#N/A		#NUM!		3
																						#DIV/0!	#N/A	#N/A		#NUM!		3
																						#DIV/0!	#N/A	#N/A		#NUM!		3
																						#DIV/0!	#N/A	#N/A		#NUM!		3
																						#DIV/0!	#N/A	#N/A		#NUM!		3
																						#DIV/0!	#N/A	#N/A		#NUM!		3
																						#DIV/0!	#N/A	#N/A		#NUM!		3
																						#DIV/0!	#N/A	#N/A		#NUM!		3
																						#DIV/0!	#N/A	#N/A		#NUM!		3
																						#DIV/0!	#N/A	#N/A		#NUM!		3
																						#DIV/0!	#N/A	#N/A		#NUM!		3
																						#DIV/0!	#N/A	#N/A		#NUM!		3
																						#DIV/0!	#N/A	#N/A		#NUM!		3
																						#DIV/0!	#N/A	#N/A		#NUM!		3
																						#DIV/0!	#N/A	#N/A		#NUM!		3
																						#DIV/0!	#N/A	#N/A		#NUM!		3
																						#DIV/0!	#N/A	#N/A		#NUM!		3
																						#DIV/0!	#N/A	#N/A		#NUM!		3
																						#DIV/0!	#N/A	#N/A		#NUM!		3
																						#DIV/0!	#N/A	#N/A		#NUM!		3
																						#DIV/0!	#N/A	#N/A		#NUM!		3
																						#DIV/0!	#N/A	#N/A		#NUM!		3
																						#DIV/0!	#N/A	#N/A		#NUM!		3
																						#DIV/0!	#N/A	#N/A		#NUM!		3
																						#DIV/0!	#N/A	#N/A		#NUM!		3
																						#DIV/0!	#N/A	#N/A		#NUM!		3
																						#DIV/0!	#N/A	#N/A		#NUM!		3
																						#DIV/0!	#N/A	#N/A		#NUM!		3
																						#DIV/0!	#N/A	#N/A		#NUM!		3
																						#DIV/0!	#N/A	#N/A		#NUM!		3
																						#DIV/0!	#N/A	#N/A		#NUM!		3
																						#DIV/0!	#N/A	#N/A		#NUM!		3
																						#DIV/0!	#N/A	#N/A		#NUM!		3
																						#DIV/0!	#N/A	#N/A		#NUM!		3
																						#DIV/0!	#N/A	#N/A		#NUM!		3
																						#DIV/0!	#N/A	#N/A		#NUM!		3
																						#DIV/0!	#N/A	#N/A		#NUM!		3
																						#DIV/0!	#N/A	#N/A		#NUM!		3
																						#DIV/0!	#N/A	#N/A		#NUM!		3
																						#DIV/0!	#N/A	#N/A		#NUM!		3
																						#DIV/0!	#N/A	#N/A		#NUM!		3
																						#DIV/0!	#N/A	#N/A		#NUM!		3
																						#DIV/0!	#N/A	#N/A		#NUM!		3
																						#DIV/0!	#N/A	#N/A		#NUM!		3
																						#DIV/0!	#N/A	#N/A		#NUM!		3
																						#DIV/0!	#N/A	#N/A		#NUM!		3
																						#DIV/0!	#N/A	#N/A		#NUM!		3
																						#DIV/0!	#N/A	#N/A		#NUM!		3
																						#DIV/0!	#N/A	#N/A		#NUM!		3
																						#DIV/0!	#N/A	#N/A		#NUM!		3
																						#DIV/0!	#N/A	#N/A		#NUM!		3
																						#DIV/0!	#N/A	#N/A		#NUM!		3
																						#DIV/0!	#N/A	#N/A		#NUM!		3
																						#DIV/0!	#N/A	#N/A		#NUM!		3
																						#DIV/0!	#N/A	#N/A		#NUM!		3
																						#DIV/0!	#N/A	#N/A		#NUM!		3
																						#DIV/0!	#N/A	#N/A		#NUM!		3
																						#DIV/0!	#N/A	#N/A		#NUM!		3
																						#DIV/0!	#N/A	#N/A		#NUM!		3
																						#DIV/0!	#N/A	#N/A		#NUM!		3
																						#DIV/0!	#N/A	#N/A		#NUM!		3
																						#DIV/0!	#N/A	#N/A		#NUM!		3
																						#DIV/0!	#N/A	#N/A		#NUM!		3
																						#DIV/0!	#N/A	#N/A		#NUM!		3
																						#DIV/0!	#N/A	#N/A		#NUM!		3
																						#DIV/0!	#N/A	#N/A		#NUM!		3
																						#DIV/0!	#N/A	#N/A		#NUM!		3
																						#DIV/0!	#N/A	#N/A		#NUM!		3
																						#DIV/0!	#N/A	#N/A		#NUM!		3
																						#DIV/0!	#N/A	#N/A		#NUM!		3
																						#DIV/0!	#N/A	#N/A		#NUM!		3
																						#DIV/0!	#N/A	#N/A		#NUM!		3
																						#DIV/0!	#N/A	#N/A		#NUM!		3
																						#DIV/0!	#N/A	#N/A		#NUM!		3
																						#DIV/0!	#N/A	#N/A		#NUM!		3
																						#DIV/0!	#N/A	#N/A		#NUM!		3
																						#DIV/0!	#N/A	#N/A		#NUM!		3
																						#DIV/0!	#N/A	#N/A		#NUM!		3
																						#DIV/0!	#N/A	#N/A		#NUM!		3
																						#DIV/0!	#N/A	#N/A		#NUM!		3
																						#DIV/0!	#N/A	#N/A		#NUM!		3
																						#DIV/0!	#N/A	#N/A		#NUM!		3
																						#DIV/0!	#N/A	#N/A		#NUM!		3
																						#DIV/0!	#N/A	#N/A		#NUM!		3
																						#DIV/0!	#N/A	#N/A		#NUM!		3
																						#DIV/0!	#N/A	#N/A		#NUM!		3
																						#DIV/0!	#N/A	#N/A		#NUM!		3
																						#DIV/0!	#N/A	#N/A		#NUM!		3
																						#DIV/0!	#N/A	#N/A		#NUM!		3
																						#DIV/0!	#N/A	#N/A		#NUM!		3
																						#DIV/0!	#N/A	#N/A		#NUM!		3
																						#DIV/0!	#N/A	#N/A		#NUM!		3
																						#DIV/0!	#N/A	#N/A		#NUM!		3
																						#DIV/0!	#N/A	#N/A		#NUM!		3
																						#DIV/0!	#N/A	#N/A		#NUM!		3
																						#DIV/0!	#N/A	#N/A		#NUM!		3
																						#DIV/0!	#N/A	#N/A		#NUM!		3
																						#DIV/0!	#N/A	#N/A		#NUM!		3
																						#DIV/0!	#N/A	#N/A		#NUM!		3
																						#DIV/0!	#N/A	#N/A		#NUM!		3
																						#DIV/0!	#N/A	#N/A		#NUM!		3
																						#DIV/0!	#N/A	#N/A		#NUM!		3
																						#DIV/0!	#N/A	#N/A		#NUM!		3
																						#DIV/0!	#N/A	#N/A		#NUM!		3
																						#DIV/0!	#N/A	#N/A		#NUM!		3
																						#DIV/0!	#N/A	#N/A		#NUM!		3
																						#DIV/0!	#N/A	#N/A		#NUM!		3
																						#DIV/0!	#N/A	#N/A		#NUM!		3
																						#DIV/0!	#N/A	#N/A		#NUM!		3
																						#DIV/0!	#N/A	#N/A		#NUM!		3
																						#DIV/0!	#N/A	#N/A		#NUM!		3
																						#DIV/0!	#N/A	#N/A		#NUM!		3
																						#DIV/0!	#N/A	#N/A		#NUM!		3
																						#DIV/0!	#N/A	#N/A		#NUM!		3
																						#DIV/0!	#N/A	#N/A		#NUM!		3
																						#DIV/0!	#N/A	#N/A		#NUM!		3
																						#DIV/0!	#N/A	#N/A		#NUM!		3
																						#DIV/0!	#N/A	#N/A		#NUM!		3
																						#DIV/0!	#N/A	#N/A		#NUM!		3
[truncated: 54 more columns]

## Sheet: Mixed Non-competitive
																							Calculated values
		No Inhibitor	[I]1	[I]2	[I]3	[I]4	[I]5	[I]6	[I]7	[I]8	[I]9	[I]10	[I]11	[I]12	[I]13	[I]14	[I]15						No Inhibitor	[I]1	[I]2	[I]3	[I]4	[I]5	[I]6	[I]7	[I]8	[I]9	[I]10	[I]11	[I]12	[I]13	[I]14	[I]15
		0	0	0	0	0	0	0	0	0	0	0	0	0	0	0	0	Km	Vmax	Ki	aKi		0	0	0	0	0	0	0	0	0	0	0	0	0	0	0	0
[S]1	0	0	0	0	0	0	0	0	0	0	0	0	0	0	0	0	0	#NUM!	#NUM!	#DIV/0!	#DIV/0!		#NUM!	#NUM!	#NUM!	#NUM!	#NUM!	#NUM!	#NUM!	#NUM!	#NUM!	#NUM!	#NUM!	#NUM!	#NUM!	#NUM!	#NUM!	#NUM!		0	0	0	0	0	0	0	0	0	0
[S]2	0	0	0	0	0	0	0	0	0	0	0	0	0	0	0	0	0						#NUM!	#NUM!	#NUM!	#NUM!	#NUM!	#NUM!	#NUM!	#NUM!	#NUM!	#NUM!	#NUM!	#NUM!	#NUM!	#NUM!	#NUM!	#NUM!		0	0	0	0	0	0	0	0	0	0
[S]3	0	0	0	0	0	0	0	0	0	0	0	0	0	0	0	0	0						#NUM!	#NUM!	#NUM!	#NUM!	#NUM!	#NUM!	#NUM!	#NUM!	#NUM!	#NUM!	#NUM!	#NUM!	#NUM!	#NUM!	#NUM!	#NUM!		0	0	0	0	0	0	0	0	0	0
[S]4	0	0	0	0	0	0	0	0	0	0	0	0	0	0	0	0	0						#NUM!	#NUM!	#NUM!	#NUM!	#NUM!	#NUM!	#NUM!	#NUM!	#NUM!	#NUM!	#NUM!	#NUM!	#NUM!	#NUM!	#NUM!	#NUM!		0	0	0	0	0	0	0	0	0	0
[S]5	0	0	0	0	0	0	0	0	0	0	0	0	0	0	0	0	0						#NUM!	#NUM!	#NUM!	#NUM!	#NUM!	#NUM!	#NUM!	#NUM!	#NUM!	#NUM!	#NUM!	#NUM!	#NUM!	#NUM!	#NUM!	#NUM!		0	0	0	0	0	0	0	0	0	0
[S]6	0	0	0	0	0	0	0	0	0	0	0	0	0	0	0	0	0			Sum R2	0		#NUM!	#NUM!	#NUM!	#NUM!	#NUM!	#NUM!	#NUM!	#NUM!	#NUM!	#NUM!	#NUM!	#NUM!	#NUM!	#NUM!	#NUM!	#NUM!		0	0	0	0	0	0	0	0	0	0
[S]7	0	0	0	0	0	0	0	0	0	0	0	0	0	0	0	0	0			Sum residuals %	0		#NUM!	#NUM!	#NUM!	#NUM!	#NUM!	#NUM!	#NUM!	#NUM!	#NUM!	#NUM!	#NUM!	#NUM!	#NUM!	#NUM!	#NUM!	#NUM!		0	0	0	0	0	0	0	0	0	0
[S]8	0	0	0	0	0	0	0	0	0	0	0	0	0	0	0	0	0						#NUM!	#NUM!	#NUM!	#NUM!	#NUM!	#NUM!	#NUM!	#NUM!	#NUM!	#NUM!	#NUM!	#NUM!	#NUM!	#NUM!	#NUM!	#NUM!		0	0	0	0	0	0	0	0	0	0
[S]9	0	0	0	0	0	0	0	0	0	0	0	0	0	0	0	0	0						#NUM!	#NUM!	#NUM!	#NUM!	#NUM!	#NUM!	#NUM!	#NUM!	#NUM!	#NUM!	#NUM!	#NUM!	#NUM!	#NUM!	#NUM!	#NUM!		0	0	0	0	0	0	0	0	0	0
[S]10	0	0	0	0	0	0	0	0	0	0	0	0	0	0	0	0	0						#NUM!	#NUM!	#NUM!	#NUM!	#NUM!	#NUM!	#NUM!	#NUM!	#NUM!	#NUM!	#NUM!	#NUM!	#NUM!	#NUM!	#NUM!	#NUM!		0	0	0	0	0	0	0	0	0	0
[S]11	0	0	0	0	0	0	0	0	0	0	0	0	0	0	0	0	0						#NUM!	#NUM!	#NUM!	#NUM!	#NUM!	#NUM!	#NUM!	#NUM!	#NUM!	#NUM!	#NUM!	#NUM!	#NUM!	#NUM!	#NUM!	#NUM!		0	0	0	0	0	0	0	0	0	0
[S]12	0	0	0	0	0	0	0	0	0	0	0	0	0	0	0	0	0						#NUM!	#NUM!	#NUM!	#NUM!	#NUM!	#NUM!	#NUM!	#NUM!	#NUM!	#NUM!	#NUM!	#NUM!	#NUM!	#NUM!	#NUM!	#NUM!		0	0	0	0	0	0	0	0	0	0
[S]13	0	0	0	0	0	0	0	0	0	0	0	0	0	0	0	0	0						#NUM!	#NUM!	#NUM!	#NUM!	#NUM!	#NUM!	#NUM!	#NUM!	#NUM!	#NUM!	#NUM!	#NUM!	#NUM!	#NUM!	#NUM!	#NUM!		0	0	0	0	0	0	0	0	0	0
[S]14	0	0	0	0	0	0	0	0	0	0	0	0	0	0	0	0	0						#NUM!	#NUM!	#NUM!	#NUM!	#NUM!	#NUM!	#NUM!	#NUM!	#NUM!	#NUM!	#NUM!	#NUM!	#NUM!	#NUM!	#NUM!	#NUM!		0	0	0	0	0	0	0	0	0	0
[S]15	0	0	0	0	0	0	0	0	0	0	0	0	0	0	0	0	0						#NUM!	#NUM!	#NUM!	#NUM!	#NUM!	#NUM!	#NUM!	#NUM!	#NUM!	#NUM!	#NUM!	#NUM!	#NUM!	#NUM!	#NUM!	#NUM!		0	0	0	0	0	0	0	0	0	0
	#DIV/0!	#DIV/0!	#DIV/0!	#DIV/0!	#DIV/0!	#DIV/0!	#DIV/0!	#DIV/0!	#DIV/0!	#DIV/0!	#DIV/0!	#DIV/0!	#DIV/0!	#DIV/0!	#DIV/0!	#DIV/0!	#DIV/0!																					#DIV/0!	#N/A	#N/A	#N/A	#N/A	#N/A	#N/A	#N/A	#N/A	#N/A	#N/A	#N/A
	#DIV/0!	#DIV/0!	#DIV/0!	#DIV/0!	#DIV/0!	#DIV/0!	#DIV/0!	#DIV/0!	#DIV/0!	#DIV/0!	#DIV/0!	#DIV/0!	#DIV/0!	#DIV/0!	#DIV/0!	#DIV/0!	#DIV/0!					#DIV/0!	#N/A	#N/A		#NUM!		4										#DIV/0!	#N/A	#N/A	#N/A	#N/A	#N/A	#N/A	#N/A	#N/A	#N/A	#N/A	#N/A
	#DIV/0!	#DIV/0!	#DIV/0!	#DIV/0!	#DIV/0!	#DIV/0!	#DIV/0!	#DIV/0!	#DIV/0!	#DIV/0!	#DIV/0!	#DIV/0!	#DIV/0!	#DIV/0!	#DIV/0!	#DIV/0!	#DIV/0!					#DIV/0!	#N/A	#N/A		#NUM!		4										#DIV/0!	#N/A	#N/A	#N/A	#N/A	#N/A	#N/A	#N/A	#N/A	#N/A	#N/A	#N/A
	#DIV/0!	#DIV/0!	#DIV/0!	#DIV/0!	#DIV/0!	#DIV/0!	#DIV/0!	#DIV/0!	#DIV/0!	#DIV/0!	#DIV/0!	#DIV/0!	#DIV/0!	#DIV/0!	#DIV/0!	#DIV/0!	#DIV/0!					#DIV/0!	#N/A	#N/A		#NUM!		4										#DIV/0!	#N/A	#N/A	#N/A	#N/A	#N/A	#N/A	#N/A	#N/A	#N/A	#N/A	#N/A
	#DIV/0!	#DIV/0!	#DIV/0!	#DIV/0!	#DIV/0!	#DIV/0!	#DIV/0!	#DIV/0!	#DIV/0!	#DIV/0!	#DIV/0!	#DIV/0!	#DIV/0!	#DIV/0!	#DIV/0!	#DIV/0!	#DIV/0!					#DIV/0!	#N/A	#N/A		#NUM!		4										#DIV/0!	#N/A	#N/A	#N/A	#N/A	#N/A	#N/A	#N/A	#N/A	#N/A	#N/A	#N/A
	#DIV/0!	#DIV/0!	#DIV/0!	#DIV/0!	#DIV/0!	#DIV/0!	#DIV/0!	#DIV/0!	#DIV/0!	#DIV/0!	#DIV/0!	#DIV/0!	#DIV/0!	#DIV/0!	#DIV/0!	#DIV/0!	#DIV/0!					#DIV/0!	#N/A	#N/A		#NUM!		4										#DIV/0!	#N/A	#N/A	#N/A	#N/A	#N/A	#N/A	#N/A	#N/A	#N/A	#N/A	#N/A
	#DIV/0!	#DIV/0!	#DIV/0!	#DIV/0!	#DIV/0!	#DIV/0!	#DIV/0!	#DIV/0!	#DIV/0!	#DIV/0!	#DIV/0!	#DIV/0!	#DIV/0!	#DIV/0!	#DIV/0!	#DIV/0!	#DIV/0!					#DIV/0!	#N/A	#N/A		#NUM!		4										#DIV/0!	#N/A	#N/A	#N/A	#N/A	#N/A	#N/A	#N/A	#N/A	#N/A	#N/A	#N/A
	#DIV/0!	#DIV/0!	#DIV/0!	#DIV/0!	#DIV/0!	#DIV/0!	#DIV/0!	#DIV/0!	#DIV/0!	#DIV/0!	#DIV/0!	#DIV/0!	#DIV/0!	#DIV/0!	#DIV/0!	#DIV/0!	#DIV/0!					#DIV/0!	#N/A	#N/A		#NUM!		4										#DIV/0!	#N/A	#N/A	#N/A	#N/A	#N/A	#N/A	#N/A	#N/A	#N/A	#N/A	#N/A
	#DIV/0!	#DIV/0!	#DIV/0!	#DIV/0!	#DIV/0!	#DIV/0!	#DIV/0!	#DIV/0!	#DIV/0!	#DIV/0!	#DIV/0!	#DIV/0!	#DIV/0!	#DIV/0!	#DIV/0!	#DIV/0!	#DIV/0!					#DIV/0!	#N/A	#N/A		#NUM!		4										#DIV/0!	#N/A	#N/A	#N/A	#N/A	#N/A	#N/A	#N/A	#N/A	#N/A	#N/A	#N/A
	#DIV/0!	#DIV/0!	#DIV/0!	#DIV/0!	#DIV/0!	#DIV/0!	#DIV/0!	#DIV/0!	#DIV/0!	#DIV/0!	#DIV/0!	#DIV/0!	#DIV/0!	#DIV/0!	#DIV/0!	#DIV/0!	#DIV/0!					#DIV/0!	#N/A	#N/A		#NUM!		4										#DIV/0!	#N/A	#N/A	#N/A	#N/A	#N/A	#N/A	#N/A	#N/A	#N/A	#N/A	#N/A
	#DIV/0!	#DIV/0!	#DIV/0!	#DIV/0!	#DIV/0!	#DIV/0!	#DIV/0!	#DIV/0!	#DIV/0!	#DIV/0!	#DIV/0!	#DIV/0!	#DIV/0!	#DIV/0!	#DIV/0!	#DIV/0!	#DIV/0!					#DIV/0!	#N/A	#N/A		#NUM!		4										#DIV/0!	#N/A	#N/A	#N/A	#N/A	#N/A	#N/A	#N/A	#N/A	#N/A	#N/A	#N/A
	#DIV/0!	#DIV/0!	#DIV/0!	#DIV/0!	#DIV/0!	#DIV/0!	#DIV/0!	#DIV/0!	#DIV/0!	#DIV/0!	#DIV/0!	#DIV/0!	#DIV/0!	#DIV/0!	#DIV/0!	#DIV/0!	#DIV/0!					#DIV/0!	#N/A	#N/A		#NUM!		4										#DIV/0!	#N/A	#N/A	#N/A	#N/A	#N/A	#N/A	#N/A	#N/A	#N/A	#N/A	#N/A
	#DIV/0!	#DIV/0!	#DIV/0!	#DIV/0!	#DIV/0!	#DIV/0!	#DIV/0!	#DIV/0!	#DIV/0!	#DIV/0!	#DIV/0!	#DIV/0!	#DIV/0!	#DIV/0!	#DIV/0!	#DIV/0!	#DIV/0!					#DIV/0!	#N/A	#N/A		#NUM!		4										#DIV/0!	#N/A	#N/A	#N/A	#N/A	#N/A	#N/A	#N/A	#N/A	#N/A	#N/A	#N/A
	#DIV/0!	#DIV/0!	#DIV/0!	#DIV/0!	#DIV/0!	#DIV/0!	#DIV/0!	#DIV/0!	#DIV/0!	#DIV/0!	#DIV/0!	#DIV/0!	#DIV/0!	#DIV/0!	#DIV/0!	#DIV/0!	#DIV/0!					#DIV/0!	#N/A	#N/A		#NUM!		4										#DIV/0!	#N/A	#N/A	#N/A	#N/A	#N/A	#N/A	#N/A	#N/A	#N/A	#N/A	#N/A
	#DIV/0!	#DIV/0!	#DIV/0!	#DIV/0!	#DIV/0!	#DIV/0!	#DIV/0!	#DIV/0!	#DIV/0!	#DIV/0!	#DIV/0!	#DIV/0!	#DIV/0!	#DIV/0!	#DIV/0!	#DIV/0!	#DIV/0!					#DIV/0!	#N/A	#N/A		#NUM!		4										#DIV/0!	#N/A	#N/A	#N/A	#N/A	#N/A	#N/A	#N/A	#N/A	#N/A	#N/A	#N/A
																						#DIV/0!	#N/A	#N/A		#NUM!		4
																						#DIV/0!	#N/A	#N/A		#NUM!		4											#N/A	#N/A	#N/A	#N/A	#N/A	#N/A	#N/A	#N/A	#N/A	#N/A	#N/A
																						#DIV/0!	#N/A	#N/A		#NUM!		4											#N/A	#N/A	#N/A	#N/A	#N/A	#N/A	#N/A	#N/A	#N/A	#N/A	#N/A
																						#DIV/0!	#N/A	#N/A		#NUM!		4											#N/A	#N/A	#N/A	#N/A	#N/A	#N/A	#N/A	#N/A	#N/A	#N/A	#N/A
																						#DIV/0!	#N/A	#N/A		#NUM!		4											#N/A	#N/A	#N/A	#N/A	#N/A	#N/A	#N/A	#N/A	#N/A	#N/A	#N/A
																						#DIV/0!	#N/A	#N/A		#NUM!		4											#N/A	#N/A	#N/A	#N/A	#N/A	#N/A	#N/A	#N/A	#N/A	#N/A	#N/A
																						#DIV/0!	#N/A	#N/A		#NUM!		4											#N/A	#N/A	#N/A	#N/A	#N/A	#N/A	#N/A	#N/A	#N/A	#N/A	#N/A
																						#DIV/0!	#N/A	#N/A		#NUM!		4											#N/A	#N/A	#N/A	#N/A	#N/A	#N/A	#N/A	#N/A	#N/A	#N/A	#N/A
																						#DIV/0!	#N/A	#N/A		#NUM!		4											#N/A	#N/A	#N/A	#N/A	#N/A	#N/A	#N/A	#N/A	#N/A	#N/A	#N/A
																						#DIV/0!	#N/A	#N/A		#NUM!		4											#N/A	#N/A	#N/A	#N/A	#N/A	#N/A	#N/A	#N/A	#N/A	#N/A	#N/A
																						#DIV/0!	#N/A	#N/A		#NUM!		4											#N/A	#N/A	#N/A	#N/A	#N/A	#N/A	#N/A	#N/A	#N/A	#N/A	#N/A
																						#DIV/0!	#N/A	#N/A		#NUM!		4											#N/A	#N/A	#N/A	#N/A	#N/A	#N/A	#N/A	#N/A	#N/A	#N/A	#N/A
																						#DIV/0!	#N/A	#N/A		#NUM!		4											#N/A	#N/A	#N/A	#N/A	#N/A	#N/A	#N/A	#N/A	#N/A	#N/A	#N/A
																						#DIV/0!	#N/A	#N/A		#NUM!		4											#N/A	#N/A	#N/A	#N/A	#N/A	#N/A	#N/A	#N/A	#N/A	#N/A	#N/A
																						#DIV/0!	#N/A	#N/A		#NUM!		4											#N/A	#N/A	#N/A	#N/A	#N/A	#N/A	#N/A	#N/A	#N/A	#N/A	#N/A
																						#DIV/0!	#N/A	#N/A		#NUM!		4											#N/A	#N/A	#N/A	#N/A	#N/A	#N/A	#N/A	#N/A	#N/A	#N/A	#N/A
																						#DIV/0!	#N/A	#N/A		#NUM!		4
																						#DIV/0!	#N/A	#N/A		#NUM!		4												#DIV/0!	#DIV/0!	#DIV/0!	#DIV/0!	#DIV/0!	#DIV/0!	#DIV/0!	#DIV/0!	#DIV/0!	#DIV/0!
																						#DIV/0!	#N/A	#N/A		#NUM!		4												#DIV/0!	#DIV/0!	#DIV/0!	#DIV/0!	#DIV/0!	#DIV/0!	#DIV/0!	#DIV/0!	#DIV/0!	#DIV/0!
																						#DIV/0!	#N/A	#N/A		#NUM!		4												#DIV/0!	#DIV/0!	#DIV/0!	#DIV/0!	#DIV/0!	#DIV/0!	#DIV/0!	#DIV/0!	#DIV/0!	#DIV/0!
																						#DIV/0!	#N/A	#N/A		#NUM!		4												#DIV/0!	#DIV/0!	#DIV/0!	#DIV/0!	#DIV/0!	#DIV/0!	#DIV/0!	#DIV/0!	#DIV/0!	#DIV/0!
																						#DIV/0!	#N/A	#N/A		#NUM!		4												#DIV/0!	#DIV/0!	#DIV/0!	#DIV/0!	#DIV/0!	#DIV/0!	#DIV/0!	#DIV/0!	#DIV/0!	#DIV/0!
																						#DIV/0!	#N/A	#N/A		#NUM!		4												#DIV/0!	#DIV/0!	#DIV/0!	#DIV/0!	#DIV/0!	#DIV/0!	#DIV/0!	#DIV/0!	#DIV/0!	#DIV/0!
																						#DIV/0!	#N/A	#N/A		#NUM!		4												#DIV/0!	#DIV/0!	#DIV/0!	#DIV/0!	#DIV/0!	#DIV/0!	#DIV/0!	#DIV/0!	#DIV/0!	#DIV/0!
																						#DIV/0!	#N/A	#N/A		#NUM!		4												#DIV/0!	#DIV/0!	#DIV/0!	#DIV/0!	#DIV/0!	#DIV/0!	#DIV/0!	#DIV/0!	#DIV/0!	#DIV/0!
																						#DIV/0!	#N/A	#N/A		#NUM!		4												#DIV/0!	#DIV/0!	#DIV/0!	#DIV/0!	#DIV/0!	#DIV/0!	#DIV/0!	#DIV/0!	#DIV/0!	#DIV/0!
																						#DIV/0!	#N/A	#N/A		#NUM!		4												#DIV/0!	#DIV/0!	#DIV/0!	#DIV/0!	#DIV/0!	#DIV/0!	#DIV/0!	#DIV/0!	#DIV/0!	#DIV/0!
																						#DIV/0!	#N/A	#N/A		#NUM!		4												#DIV/0!	#DIV/0!	#DIV/0!	#DIV/0!	#DIV/0!	#DIV/0!	#DIV/0!	#DIV/0!	#DIV/0!	#DIV/0!
																						#DIV/0!	#N/A	#N/A		#NUM!		4												#DIV/0!	#DIV/0!	#DIV/0!	#DIV/0!	#DIV/0!	#DIV/0!	#DIV/0!	#DIV/0!	#DIV/0!	#DIV/0!
																						#DIV/0!	#N/A	#N/A		#NUM!		4												#DIV/0!	#DIV/0!	#DIV/0!	#DIV/0!	#DIV/0!	#DIV/0!	#DIV/0!	#DIV/0!	#DIV/0!	#DIV/0!
																						#DIV/0!	#N/A	#N/A		#NUM!		4												#DIV/0!	#DIV/0!	#DIV/0!	#DIV/0!	#DIV/0!	#DIV/0!	#DIV/0!	#DIV/0!	#DIV/0!	#DIV/0!
																						#DIV/0!	#N/A	#N/A		#NUM!		4												#DIV/0!	#DIV/0!	#DIV/0!	#DIV/0!	#DIV/0!	#DIV/0!	#DIV/0!	#DIV/0!	#DIV/0!	#DIV/0!
																						#DIV/0!	#N/A	#N/A		#NUM!		4
																						#DIV/0!	#N/A	#N/A		#NUM!		4												1/s	0	0	0	0	0	0	0	0	0
																						#DIV/0!	#N/A	#N/A		#NUM!		4											1	#N/A	#N/A	#N/A	#N/A	#N/A	#N/A	#N/A	#N/A	#N/A	#N/A
																						#DIV/0!	#N/A	#N/A		#NUM!		4											2	#N/A	#N/A	#N/A	#N/A	#N/A	#N/A	#N/A	#N/A	#N/A	#N/A
																						#DIV/0!	#N/A	#N/A		#NUM!		4											3	#N/A	#N/A	#N/A	#N/A	#N/A	#N/A	#N/A	#N/A	#N/A	#N/A
																						#DIV/0!	#N/A	#N/A		#NUM!		4											4	#N/A	#N/A	#N/A	#N/A	#N/A	#N/A	#N/A	#N/A	#N/A	#N/A
																						#DIV/0!	#N/A	#N/A		#NUM!		4											5	#N/A	#N/A	#N/A	#N/A	#N/A	#N/A	#N/A	#N/A	#N/A	#N/A
																						#DIV/0!	#N/A	#N/A		#NUM!		4											6	#N/A	#N/A	#N/A	#N/A	#N/A	#N/A	#N/A	#N/A	#N/A	#N/A
																						#DIV/0!	#N/A	#N/A		#NUM!		4											7	#N/A	#N/A	#N/A	#N/A	#N/A	#N/A	#N/A	#N/A	#N/A	#N/A
																						#DIV/0!	#N/A	#N/A		#NUM!		4											8	#N/A	#N/A	#N/A	#N/A	#N/A	#N/A	#N/A	#N/A	#N/A	#N/A
																						#DIV/0!	#N/A	#N/A		#NUM!		4											9	#N/A	#N/A	#N/A	#N/A	#N/A	#N/A	#N/A	#N/A	#N/A	#N/A
																						#DIV/0!	#N/A	#N/A		#NUM!		4											10	#N/A	#N/A	#N/A	#N/A	#N/A	#N/A	#N/A	#N/A	#N/A	#N/A
																						#DIV/0!	#N/A	#N/A		#NUM!		4											11	#N/A	#N/A	#N/A	#N/A	#N/A	#N/A	#N/A	#N/A	#N/A	#N/A
																						#DIV/0!	#N/A	#N/A		#NUM!		4											12	#N/A	#N/A	#N/A	#N/A	#N/A	#N/A	#N/A	#N/A	#N/A	#N/A
																						#DIV/0!	#N/A	#N/A		#NUM!		4											13	#N/A	#N/A	#N/A	#N/A	#N/A	#N/A	#N/A	#N/A	#N/A	#N/A
																						#DIV/0!	#N/A	#N/A		#NUM!		4											14	#N/A	#N/A	#N/A	#N/A	#N/A	#N/A	#N/A	#N/A	#N/A	#N/A
																						#DIV/0!	#N/A	#N/A		#NUM!		4											15	#N/A	#N/A	#N/A	#N/A	#N/A	#N/A	#N/A	#N/A	#N/A	#N/A
																						#DIV/0!	#N/A	#N/A		#NUM!		4
																						#DIV/0!	#N/A	#N/A		#NUM!		4
																						#DIV/0!	#N/A	#N/A		#NUM!		4
																						#DIV/0!	#N/A	#N/A		#NUM!		4
																						#DIV/0!	#N/A	#N/A		#NUM!		4
																						#DIV/0!	#N/A	#N/A		#NUM!		4
																						#DIV/0!	#N/A	#N/A		#NUM!		4
																						#DIV/0!	#N/A	#N/A		#NUM!		4
																						#DIV/0!	#N/A	#N/A		#NUM!		4
																						#DIV/0!	#N/A	#N/A		#NUM!		4
																						#DIV/0!	#N/A	#N/A		#NUM!		4
																						#DIV/0!	#N/A	#N/A		#NUM!		4
																						#DIV/0!	#N/A	#N/A		#NUM!		4
																						#DIV/0!	#N/A	#N/A		#NUM!		4
																						#DIV/0!	#N/A	#N/A		#NUM!		4
																						#DIV/0!	#N/A	#N/A		#NUM!		4
																						#DIV/0!	#N/A	#N/A		#NUM!		4
																						#DIV/0!	#N/A	#N/A		#NUM!		4
																						#DIV/0!	#N/A	#N/A		#NUM!		4
																						#DIV/0!	#N/A	#N/A		#NUM!		4
																						#DIV/0!	#N/A	#N/A		#NUM!		4
																						#DIV/0!	#N/A	#N/A		#NUM!		4
																						#DIV/0!	#N/A	#N/A		#NUM!		4
																						#DIV/0!	#N/A	#N/A		#NUM!		4
																						#DIV/0!	#N/A	#N/A		#NUM!		4
																						#DIV/0!	#N/A	#N/A		#NUM!		4
																						#DIV/0!	#N/A	#N/A		#NUM!		4
																						#DIV/0!	#N/A	#N/A		#NUM!		4
																						#DIV/0!	#N/A	#N/A		#NUM!		4
																						#DIV/0!	#N/A	#N/A		#NUM!		4
																						#DIV/0!	#N/A	#N/A		#NUM!		4
																						#DIV/0!	#N/A	#N/A		#NUM!		4
																						#DIV/0!	#N/A	#N/A		#NUM!		4
																						#DIV/0!	#N/A	#N/A		#NUM!		4
																						#DIV/0!	#N/A	#N/A		#NUM!		4
																						#DIV/0!	#N/A	#N/A		#NUM!		4
																						#DIV/0!	#N/A	#N/A		#NUM!		4
																						#DIV/0!	#N/A	#N/A		#NUM!		4
																						#DIV/0!	#N/A	#N/A		#NUM!		4
																						#DIV/0!	#N/A	#N/A		#NUM!		4
																						#DIV/0!	#N/A	#N/A		#NUM!		4
																						#DIV/0!	#N/A	#N/A		#NUM!		4
																						#DIV/0!	#N/A	#N/A		#NUM!		4
																						#DIV/0!	#N/A	#N/A		#NUM!		4
																						#DIV/0!	#N/A	#N/A		#NUM!		4
																						#DIV/0!	#N/A	#N/A		#NUM!		4
																						#DIV/0!	#N/A	#N/A		#NUM!		4
																						#DIV/0!	#N/A	#N/A		#NUM!		4
																						#DIV/0!	#N/A	#N/A		#NUM!		4
																						#DIV/0!	#N/A	#N/A		#NUM!		4
																						#DIV/0!	#N/A	#N/A		#NUM!		4
																						#DIV/0!	#N/A	#N/A		#NUM!		4
																						#DIV/0!	#N/A	#N/A		#NUM!		4
																						#DIV/0!	#N/A	#N/A		#NUM!		4
																						#DIV/0!	#N/A	#N/A		#NUM!		4
																						#DIV/0!	#N/A	#N/A		#NUM!		4
																						#DIV/0!	#N/A	#N/A		#NUM!		4
																						#DIV/0!	#N/A	#N/A		#NUM!		4
																						#DIV/0!	#N/A	#N/A		#NUM!		4
																						#DIV/0!	#N/A	#N/A		#NUM!		4
																						#DIV/0!	#N/A	#N/A		#NUM!		4
																						#DIV/0!	#N/A	#N/A		#NUM!		4
																						#DIV/0!	#N/A	#N/A		#NUM!		4
																						#DIV/0!	#N/A	#N/A		#NUM!		4
																						#DIV/0!	#N/A	#N/A		#NUM!		4
																						#DIV/0!	#N/A	#N/A		#NUM!		4
																						#DIV/0!	#N/A	#N/A		#NUM!		4
																						#DIV/0!	#N/A	#N/A		#NUM!		4
																						#DIV/0!	#N/A	#N/A		#NUM!		4
																						#DIV/0!	#N/A	#N/A		#NUM!		4
																						#DIV/0!	#N/A	#N/A		#NUM!		4
																						#DIV/0!	#N/A	#N/A		#NUM!		4
																						#DIV/0!	#N/A	#N/A		#NUM!		4
																						#DIV/0!	#N/A	#N/A		#NUM!		4
																						#DIV/0!	#N/A	#N/A		#NUM!		4
																						#DIV/0!	#N/A	#N/A		#NUM!		4
																						#DIV/0!	#N/A	#N/A		#NUM!		4
																						#DIV/0!	#N/A	#N/A		#NUM!		4
																						#DIV/0!	#N/A	#N/A		#NUM!		4
																						#DIV/0!	#N/A	#N/A		#NUM!		4
																						#DIV/0!	#N/A	#N/A		#NUM!		4
																						#DIV/0!	#N/A	#N/A		#NUM!		4
																						#DIV/0!	#N/A	#N/A		#NUM!		4
																						#DIV/0!	#N/A	#N/A		#NUM!		4
																						#DIV/0!	#N/A	#N/A		#NUM!		4
																						#DIV/0!	#N/A	#N/A		#NUM!		4
																						#DIV/0!	#N/A	#N/A		#NUM!		4
																						#DIV/0!	#N/A	#N/A		#NUM!		4
																						#DIV/0!	#N/A	#N/A		#NUM!		4
																						#DIV/0!	#N/A	#N/A		#NUM!		4
																						#DIV/0!	#N/A	#N/A		#NUM!		4
																						#DIV/0!	#N/A	#N/A		#NUM!		4
																						#DIV/0!	#N/A	#N/A		#NUM!		4
																						#DIV/0!	#N/A	#N/A		#NUM!		4
																						#DIV/0!	#N/A	#N/A		#NUM!		4
																						#DIV/0!	#N/A	#N/A		#NUM!		4
																						#DIV/0!	#N/A	#N/A		#NUM!		4
																						#DIV/0!	#N/A	#N/A		#NUM!		4
																						#DIV/0!	#N/A	#N/A		#NUM!		4
																						#DIV/0!	#N/A	#N/A		#NUM!		4
																						#DIV/0!	#N/A	#N/A		#NUM!		4
																						#DIV/0!	#N/A	#N/A		#NUM!		4
																						#DIV/0!	#N/A	#N/A		#NUM!		4
																						#DIV/0!	#N/A	#N/A		#NUM!		4
																						#DIV/0!	#N/A	#N/A		#NUM!		4
																						#DIV/0!	#N/A	#N/A		#NUM!		4
																						#DIV/0!	#N/A	#N/A		#NUM!		4
																						#DIV/0!	#N/A	#N/A		#NUM!		4
																						#DIV/0!	#N/A	#N/A		#NUM!		4
																						#DIV/0!	#N/A	#N/A		#NUM!		4
																						#DIV/0!	#N/A	#N/A		#NUM!		4
																						#DIV/0!	#N/A	#N/A		#NUM!		4
																						#DIV/0!	#N/A	#N/A		#NUM!		4
																						#DIV/0!	#N/A	#N/A		#NUM!		4
																						#DIV/0!	#N/A	#N/A		#NUM!		4
																						#DIV/0!	#N/A	#N/A		#NUM!		4
																						#DIV/0!	#N/A	#N/A		#NUM!		4
																						#DIV/0!	#N/A	#N/A		#NUM!		4
																						#DIV/0!	#N/A	#N/A		#NUM!		4
																						#DIV/0!	#N/A	#N/A		#NUM!		4
																						#DIV/0!	#N/A	#N/A		#NUM!		4
																						#DIV/0!	#N/A	#N/A		#NUM!		4
																						#DIV/0!	#N/A	#N/A		#NUM!		4
																						#DIV/0!	#N/A	#N/A		#NUM!		4
																						#DIV/0!	#N/A	#N/A		#NUM!		4
																						#DIV/0!	#N/A	#N/A		#NUM!		4
																						#DIV/0!	#N/A	#N/A		#NUM!		4
																						#DIV/0!	#N/A	#N/A		#NUM!		4
																						#DIV/0!	#N/A	#N/A		#NUM!		4
																						#DIV/0!	#N/A	#N/A		#NUM!		4
																						#DIV/0!	#N/A	#N/A		#NUM!		4
																						#DIV/0!	#N/A	#N/A		#NUM!		4
																						#DIV/0!	#N/A	#N/A		#NUM!		4
																						#DIV/0!	#N/A	#N/A		#NUM!		4
																						#DIV/0!	#N/A	#N/A		#NUM!		4
																						#DIV/0!	#N/A	#N/A		#NUM!		4
																						#DIV/0!	#N/A	#N/A		#NUM!		4
																						#DIV/0!	#N/A	#N/A		#NUM!		4
																						#DIV/0!	#N/A	#N/A		#NUM!		4
																						#DIV/0!	#N/A	#N/A		#NUM!		4
																						#DIV/0!	#N/A	#N/A		#NUM!		4
																						#DIV/0!	#N/A	#N/A		#NUM!		4
																						#DIV/0!	#N/A	#N/A		#NUM!		4
																						#DIV/0!	#N/A	#N/A		#NUM!		4
																						#DIV/0!	#N/A	#N/A		#NUM!		4
																						#DIV/0!	#N/A	#N/A		#NUM!		4
																						#DIV/0!	#N/A	#N/A		#NUM!		4
																						#DIV/0!	#N/A	#N/A		#NUM!		4
																						#DIV/0!	#N/A	#N/A		#NUM!		4
																						#DIV/0!	#N/A	#N/A		#NUM!		4
																						#DIV/0!	#N/A	#N/A		#NUM!		4
																						#DIV/0!	#N/A	#N/A		#NUM!		4
																						#DIV/0!	#N/A	#N/A		#NUM!		4
																						#DIV/0!	#N/A	#N/A		#NUM!		4
																						#DIV/0!	#N/A	#N/A		#NUM!		4
																						#DIV/0!	#N/A	#N/A		#NUM!		4
																						#DIV/0!	#N/A	#N/A		#NUM!		4
																						#DIV/0!	#N/A	#N/A		#NUM!		4
																						#DIV/0!	#N/A	#N/A		#NUM!		4
																						#DIV/0!	#N/A	#N/A		#NUM!		4
																						#DIV/0!	#N/A	#N/A		#NUM!		4
																						#DIV/0!	#N/A	#N/A		#NUM!		4
																						#DIV/0!	#N/A	#N/A		#NUM!		4
																						#DIV/0!	#N/A	#N/A		#NUM!		4
																						#DIV/0!	#N/A	#N/A		#NUM!		4
																						#DIV/0!	#N/A	#N/A		#NUM!		4
																						#DIV/0!	#N/A	#N/A		#NUM!		4
																						#DIV/0!	#N/A	#N/A		#NUM!		4
																						#DIV/0!	#N/A	#N/A		#NUM!		4
																						#DIV/0!	#N/A	#N/A		#NUM!		4
																						#DIV/0!	#N/A	#N/A		#NUM!		4
																						#DIV/0!	#N/A	#N/A		#NUM!		4
																						#DIV/0!	#N/A	#N/A		#NUM!		4
																						#DIV/0!	#N/A	#N/A		#NUM!		4
																						#DIV/0!	#N/A	#N/A		#NUM!		4
																						#DIV/0!	#N/A	#N/A		#NUM!		4
																						#DIV/0!	#N/A	#N/A		#NUM!		4
[truncated: 54 more columns]

## Sheet: Modifier equation
																							Calculated values
		No Inhibitor	[I]1	[I]2	[I]3	[I]4	[I]5	[I]6	[I]7	[I]8	[I]9	[I]10	[I]11	[I]12	[I]13	[I]14	[I]15					Ki	No Inhibitor	[I]1	[I]2	[I]3	[I]4	[I]5	[I]6	[I]7	[I]8	[I]9	[I]10	[I]11	[I]12	[I]13	[I]14	[I]15
		0	0	0	0	0	0	0	0	0	0	0	0	0	0	0	0	K1	#NUM!	V1	#NUM!	#DIV/0!	0	0	0	0	0	0	0	0	0	0	0	0	0	0	0	0
[S]1	0	0	0	0	0	0	0	0	0	0	0	0	0	0	0	0	0	K2	#NUM!	V2	#NUM!		#NUM!	#NUM!	#NUM!	#NUM!	#NUM!	#NUM!	#NUM!	#NUM!	#NUM!	#NUM!	#NUM!	#NUM!	#NUM!	#NUM!	#NUM!	#NUM!		0	0	0	0	0	0	0	0	0	0
[S]2	0	0	0	0	0	0	0	0	0	0	0	0	0	0	0	0	0						#NUM!	#NUM!	#NUM!	#NUM!	#NUM!	#NUM!	#NUM!	#NUM!	#NUM!	#NUM!	#NUM!	#NUM!	#NUM!	#NUM!	#NUM!	#NUM!		0	0	0	0	0	0	0	0	0	0
[S]3	0	0	0	0	0	0	0	0	0	0	0	0	0	0	0	0	0						#NUM!	#NUM!	#NUM!	#NUM!	#NUM!	#NUM!	#NUM!	#NUM!	#NUM!	#NUM!	#NUM!	#NUM!	#NUM!	#NUM!	#NUM!	#NUM!		0	0	0	0	0	0	0	0	0	0
[S]4	0	0	0	0	0	0	0	0	0	0	0	0	0	0	0	0	0						#NUM!	#NUM!	#NUM!	#NUM!	#NUM!	#NUM!	#NUM!	#NUM!	#NUM!	#NUM!	#NUM!	#NUM!	#NUM!	#NUM!	#NUM!	#NUM!		0	0	0	0	0	0	0	0	0	0
[S]5	0	0	0	0	0	0	0	0	0	0	0	0	0	0	0	0	0						#NUM!	#NUM!	#NUM!	#NUM!	#NUM!	#NUM!	#NUM!	#NUM!	#NUM!	#NUM!	#NUM!	#NUM!	#NUM!	#NUM!	#NUM!	#NUM!		0	0	0	0	0	0	0	0	0	0
[S]6	0	0	0	0	0	0	0	0	0	0	0	0	0	0	0	0	0			Sum R2	0		#NUM!	#NUM!	#NUM!	#NUM!	#NUM!	#NUM!	#NUM!	#NUM!	#NUM!	#NUM!	#NUM!	#NUM!	#NUM!	#NUM!	#NUM!	#NUM!		0	0	0	0	0	0	0	0	0	0
[S]7	0	0	0	0	0	0	0	0	0	0	0	0	0	0	0	0	0			Sum residuals %	0		#NUM!	#NUM!	#NUM!	#NUM!	#NUM!	#NUM!	#NUM!	#NUM!	#NUM!	#NUM!	#NUM!	#NUM!	#NUM!	#NUM!	#NUM!	#NUM!		0	0	0	0	0	0	0	0	0	0
[S]8	0	0	0	0	0	0	0	0	0	0	0	0	0	0	0	0	0						#NUM!	#NUM!	#NUM!	#NUM!	#NUM!	#NUM!	#NUM!	#NUM!	#NUM!	#NUM!	#NUM!	#NUM!	#NUM!	#NUM!	#NUM!	#NUM!		0	0	0	0	0	0	0	0	0	0
[S]9	0	0	0	0	0	0	0	0	0	0	0	0	0	0	0	0	0						#NUM!	#NUM!	#NUM!	#NUM!	#NUM!	#NUM!	#NUM!	#NUM!	#NUM!	#NUM!	#NUM!	#NUM!	#NUM!	#NUM!	#NUM!	#NUM!		0	0	0	0	0	0	0	0	0	0
[S]10	0	0	0	0	0	0	0	0	0	0	0	0	0	0	0	0	0						#NUM!	#NUM!	#NUM!	#NUM!	#NUM!	#NUM!	#NUM!	#NUM!	#NUM!	#NUM!	#NUM!	#NUM!	#NUM!	#NUM!	#NUM!	#NUM!		0	0	0	0	0	0	0	0	0	0
[S]11	0	0	0	0	0	0	0	0	0	0	0	0	0	0	0	0	0						#NUM!	#NUM!	#NUM!	#NUM!	#NUM!	#NUM!	#NUM!	#NUM!	#NUM!	#NUM!	#NUM!	#NUM!	#NUM!	#NUM!	#NUM!	#NUM!		0	0	0	0	0	0	0	0	0	0
[S]12	0	0	0	0	0	0	0	0	0	0	0	0	0	0	0	0	0						#NUM!	#NUM!	#NUM!	#NUM!	#NUM!	#NUM!	#NUM!	#NUM!	#NUM!	#NUM!	#NUM!	#NUM!	#NUM!	#NUM!	#NUM!	#NUM!		0	0	0	0	0	0	0	0	0	0
[S]13	0	0	0	0	0	0	0	0	0	0	0	0	0	0	0	0	0						#NUM!	#NUM!	#NUM!	#NUM!	#NUM!	#NUM!	#NUM!	#NUM!	#NUM!	#NUM!	#NUM!	#NUM!	#NUM!	#NUM!	#NUM!	#NUM!		0	0	0	0	0	0	0	0	0	0
[S]14	0	0	0	0	0	0	0	0	0	0	0	0	0	0	0	0	0						#NUM!	#NUM!	#NUM!	#NUM!	#NUM!	#NUM!	#NUM!	#NUM!	#NUM!	#NUM!	#NUM!	#NUM!	#NUM!	#NUM!	#NUM!	#NUM!		0	0	0	0	0	0	0	0	0	0
[S]15	0	0	0	0	0	0	0	0	0	0	0	0	0	0	0	0	0						#NUM!	#NUM!	#NUM!	#NUM!	#NUM!	#NUM!	#NUM!	#NUM!	#NUM!	#NUM!	#NUM!	#NUM!	#NUM!	#NUM!	#NUM!	#NUM!		0	0	0	0	0	0	0	0	0	0
	#DIV/0!	#DIV/0!	#DIV/0!	#DIV/0!	#DIV/0!	#DIV/0!	#DIV/0!	#DIV/0!	#DIV/0!	#DIV/0!	#DIV/0!	#DIV/0!	#DIV/0!	#DIV/0!	#DIV/0!	#DIV/0!	#DIV/0!																					#DIV/0!	#N/A	#N/A	#N/A	#N/A	#N/A	#N/A	#N/A	#N/A	#N/A	#N/A	#N/A
	#DIV/0!	#DIV/0!	#DIV/0!	#DIV/0!	#DIV/0!	#DIV/0!	#DIV/0!	#DIV/0!	#DIV/0!	#DIV/0!	#DIV/0!	#DIV/0!	#DIV/0!	#DIV/0!	#DIV/0!	#DIV/0!	#DIV/0!					#DIV/0!	#N/A	#N/A		#NUM!		5										#DIV/0!	#N/A	#N/A	#N/A	#N/A	#N/A	#N/A	#N/A	#N/A	#N/A	#N/A	#N/A
	#DIV/0!	#DIV/0!	#DIV/0!	#DIV/0!	#DIV/0!	#DIV/0!	#DIV/0!	#DIV/0!	#DIV/0!	#DIV/0!	#DIV/0!	#DIV/0!	#DIV/0!	#DIV/0!	#DIV/0!	#DIV/0!	#DIV/0!					#DIV/0!	#N/A	#N/A		#NUM!		5										#DIV/0!	#N/A	#N/A	#N/A	#N/A	#N/A	#N/A	#N/A	#N/A	#N/A	#N/A	#N/A
	#DIV/0!	#DIV/0!	#DIV/0!	#DIV/0!	#DIV/0!	#DIV/0!	#DIV/0!	#DIV/0!	#DIV/0!	#DIV/0!	#DIV/0!	#DIV/0!	#DIV/0!	#DIV/0!	#DIV/0!	#DIV/0!	#DIV/0!					#DIV/0!	#N/A	#N/A		#NUM!		5										#DIV/0!	#N/A	#N/A	#N/A	#N/A	#N/A	#N/A	#N/A	#N/A	#N/A	#N/A	#N/A
	#DIV/0!	#DIV/0!	#DIV/0!	#DIV/0!	#DIV/0!	#DIV/0!	#DIV/0!	#DIV/0!	#DIV/0!	#DIV/0!	#DIV/0!	#DIV/0!	#DIV/0!	#DIV/0!	#DIV/0!	#DIV/0!	#DIV/0!					#DIV/0!	#N/A	#N/A		#NUM!		5										#DIV/0!	#N/A	#N/A	#N/A	#N/A	#N/A	#N/A	#N/A	#N/A	#N/A	#N/A	#N/A
	#DIV/0!	#DIV/0!	#DIV/0!	#DIV/0!	#DIV/0!	#DIV/0!	#DIV/0!	#DIV/0!	#DIV/0!	#DIV/0!	#DIV/0!	#DIV/0!	#DIV/0!	#DIV/0!	#DIV/0!	#DIV/0!	#DIV/0!					#DIV/0!	#N/A	#N/A		#NUM!		5										#DIV/0!	#N/A	#N/A	#N/A	#N/A	#N/A	#N/A	#N/A	#N/A	#N/A	#N/A	#N/A
	#DIV/0!	#DIV/0!	#DIV/0!	#DIV/0!	#DIV/0!	#DIV/0!	#DIV/0!	#DIV/0!	#DIV/0!	#DIV/0!	#DIV/0!	#DIV/0!	#DIV/0!	#DIV/0!	#DIV/0!	#DIV/0!	#DIV/0!					#DIV/0!	#N/A	#N/A		#NUM!		5										#DIV/0!	#N/A	#N/A	#N/A	#N/A	#N/A	#N/A	#N/A	#N/A	#N/A	#N/A	#N/A
	#DIV/0!	#DIV/0!	#DIV/0!	#DIV/0!	#DIV/0!	#DIV/0!	#DIV/0!	#DIV/0!	#DIV/0!	#DIV/0!	#DIV/0!	#DIV/0!	#DIV/0!	#DIV/0!	#DIV/0!	#DIV/0!	#DIV/0!					#DIV/0!	#N/A	#N/A		#NUM!		5										#DIV/0!	#N/A	#N/A	#N/A	#N/A	#N/A	#N/A	#N/A	#N/A	#N/A	#N/A	#N/A
	#DIV/0!	#DIV/0!	#DIV/0!	#DIV/0!	#DIV/0!	#DIV/0!	#DIV/0!	#DIV/0!	#DIV/0!	#DIV/0!	#DIV/0!	#DIV/0!	#DIV/0!	#DIV/0!	#DIV/0!	#DIV/0!	#DIV/0!					#DIV/0!	#N/A	#N/A		#NUM!		5										#DIV/0!	#N/A	#N/A	#N/A	#N/A	#N/A	#N/A	#N/A	#N/A	#N/A	#N/A	#N/A
	#DIV/0!	#DIV/0!	#DIV/0!	#DIV/0!	#DIV/0!	#DIV/0!	#DIV/0!	#DIV/0!	#DIV/0!	#DIV/0!	#DIV/0!	#DIV/0!	#DIV/0!	#DIV/0!	#DIV/0!	#DIV/0!	#DIV/0!					#DIV/0!	#N/A	#N/A		#NUM!		5										#DIV/0!	#N/A	#N/A	#N/A	#N/A	#N/A	#N/A	#N/A	#N/A	#N/A	#N/A	#N/A
	#DIV/0!	#DIV/0!	#DIV/0!	#DIV/0!	#DIV/0!	#DIV/0!	#DIV/0!	#DIV/0!	#DIV/0!	#DIV/0!	#DIV/0!	#DIV/0!	#DIV/0!	#DIV/0!	#DIV/0!	#DIV/0!	#DIV/0!					#DIV/0!	#N/A	#N/A		#NUM!		5										#DIV/0!	#N/A	#N/A	#N/A	#N/A	#N/A	#N/A	#N/A	#N/A	#N/A	#N/A	#N/A
	#DIV/0!	#DIV/0!	#DIV/0!	#DIV/0!	#DIV/0!	#DIV/0!	#DIV/0!	#DIV/0!	#DIV/0!	#DIV/0!	#DIV/0!	#DIV/0!	#DIV/0!	#DIV/0!	#DIV/0!	#DIV/0!	#DIV/0!					#DIV/0!	#N/A	#N/A		#NUM!		5										#DIV/0!	#N/A	#N/A	#N/A	#N/A	#N/A	#N/A	#N/A	#N/A	#N/A	#N/A	#N/A
	#DIV/0!	#DIV/0!	#DIV/0!	#DIV/0!	#DIV/0!	#DIV/0!	#DIV/0!	#DIV/0!	#DIV/0!	#DIV/0!	#DIV/0!	#DIV/0!	#DIV/0!	#DIV/0!	#DIV/0!	#DIV/0!	#DIV/0!					#DIV/0!	#N/A	#N/A		#NUM!		5										#DIV/0!	#N/A	#N/A	#N/A	#N/A	#N/A	#N/A	#N/A	#N/A	#N/A	#N/A	#N/A
	#DIV/0!	#DIV/0!	#DIV/0!	#DIV/0!	#DIV/0!	#DIV/0!	#DIV/0!	#DIV/0!	#DIV/0!	#DIV/0!	#DIV/0!	#DIV/0!	#DIV/0!	#DIV/0!	#DIV/0!	#DIV/0!	#DIV/0!					#DIV/0!	#N/A	#N/A		#NUM!		5										#DIV/0!	#N/A	#N/A	#N/A	#N/A	#N/A	#N/A	#N/A	#N/A	#N/A	#N/A	#N/A
	#DIV/0!	#DIV/0!	#DIV/0!	#DIV/0!	#DIV/0!	#DIV/0!	#DIV/0!	#DIV/0!	#DIV/0!	#DIV/0!	#DIV/0!	#DIV/0!	#DIV/0!	#DIV/0!	#DIV/0!	#DIV/0!	#DIV/0!					#DIV/0!	#N/A	#N/A		#NUM!		5										#DIV/0!	#N/A	#N/A	#N/A	#N/A	#N/A	#N/A	#N/A	#N/A	#N/A	#N/A	#N/A
																						#DIV/0!	#N/A	#N/A		#NUM!		5
																						#DIV/0!	#N/A	#N/A		#NUM!		5											#N/A	#N/A	#N/A	#N/A	#N/A	#N/A	#N/A	#N/A	#N/A	#N/A	#N/A
																						#DIV/0!	#N/A	#N/A		#NUM!		5											#N/A	#N/A	#N/A	#N/A	#N/A	#N/A	#N/A	#N/A	#N/A	#N/A	#N/A
																						#DIV/0!	#N/A	#N/A		#NUM!		5											#N/A	#N/A	#N/A	#N/A	#N/A	#N/A	#N/A	#N/A	#N/A	#N/A	#N/A
																						#DIV/0!	#N/A	#N/A		#NUM!		5											#N/A	#N/A	#N/A	#N/A	#N/A	#N/A	#N/A	#N/A	#N/A	#N/A	#N/A
																						#DIV/0!	#N/A	#N/A		#NUM!		5											#N/A	#N/A	#N/A	#N/A	#N/A	#N/A	#N/A	#N/A	#N/A	#N/A	#N/A
																						#DIV/0!	#N/A	#N/A		#NUM!		5											#N/A	#N/A	#N/A	#N/A	#N/A	#N/A	#N/A	#N/A	#N/A	#N/A	#N/A
																						#DIV/0!	#N/A	#N/A		#NUM!		5											#N/A	#N/A	#N/A	#N/A	#N/A	#N/A	#N/A	#N/A	#N/A	#N/A	#N/A
																						#DIV/0!	#N/A	#N/A		#NUM!		5											#N/A	#N/A	#N/A	#N/A	#N/A	#N/A	#N/A	#N/A	#N/A	#N/A	#N/A
																						#DIV/0!	#N/A	#N/A		#NUM!		5											#N/A	#N/A	#N/A	#N/A	#N/A	#N/A	#N/A	#N/A	#N/A	#N/A	#N/A
																						#DIV/0!	#N/A	#N/A		#NUM!		5											#N/A	#N/A	#N/A	#N/A	#N/A	#N/A	#N/A	#N/A	#N/A	#N/A	#N/A
																						#DIV/0!	#N/A	#N/A		#NUM!		5											#N/A	#N/A	#N/A	#N/A	#N/A	#N/A	#N/A	#N/A	#N/A	#N/A	#N/A
																						#DIV/0!	#N/A	#N/A		#NUM!		5											#N/A	#N/A	#N/A	#N/A	#N/A	#N/A	#N/A	#N/A	#N/A	#N/A	#N/A
																						#DIV/0!	#N/A	#N/A		#NUM!		5											#N/A	#N/A	#N/A	#N/A	#N/A	#N/A	#N/A	#N/A	#N/A	#N/A	#N/A
																						#DIV/0!	#N/A	#N/A		#NUM!		5											#N/A	#N/A	#N/A	#N/A	#N/A	#N/A	#N/A	#N/A	#N/A	#N/A	#N/A
																						#DIV/0!	#N/A	#N/A		#NUM!		5											#N/A	#N/A	#N/A	#N/A	#N/A	#N/A	#N/A	#N/A	#N/A	#N/A	#N/A
																						#DIV/0!	#N/A	#N/A		#NUM!		5
																						#DIV/0!	#N/A	#N/A		#NUM!		5												#DIV/0!	#DIV/0!	#DIV/0!	#DIV/0!	#DIV/0!	#DIV/0!	#DIV/0!	#DIV/0!	#DIV/0!	#DIV/0!
																						#DIV/0!	#N/A	#N/A		#NUM!		5												#DIV/0!	#DIV/0!	#DIV/0!	#DIV/0!	#DIV/0!	#DIV/0!	#DIV/0!	#DIV/0!	#DIV/0!	#DIV/0!
																						#DIV/0!	#N/A	#N/A		#NUM!		5												#DIV/0!	#DIV/0!	#DIV/0!	#DIV/0!	#DIV/0!	#DIV/0!	#DIV/0!	#DIV/0!	#DIV/0!	#DIV/0!
																						#DIV/0!	#N/A	#N/A		#NUM!		5												#DIV/0!	#DIV/0!	#DIV/0!	#DIV/0!	#DIV/0!	#DIV/0!	#DIV/0!	#DIV/0!	#DIV/0!	#DIV/0!
																						#DIV/0!	#N/A	#N/A		#NUM!		5												#DIV/0!	#DIV/0!	#DIV/0!	#DIV/0!	#DIV/0!	#DIV/0!	#DIV/0!	#DIV/0!	#DIV/0!	#DIV/0!
																						#DIV/0!	#N/A	#N/A		#NUM!		5												#DIV/0!	#DIV/0!	#DIV/0!	#DIV/0!	#DIV/0!	#DIV/0!	#DIV/0!	#DIV/0!	#DIV/0!	#DIV/0!
																						#DIV/0!	#N/A	#N/A		#NUM!		5												#DIV/0!	#DIV/0!	#DIV/0!	#DIV/0!	#DIV/0!	#DIV/0!	#DIV/0!	#DIV/0!	#DIV/0!	#DIV/0!
																						#DIV/0!	#N/A	#N/A		#NUM!		5												#DIV/0!	#DIV/0!	#DIV/0!	#DIV/0!	#DIV/0!	#DIV/0!	#DIV/0!	#DIV/0!	#DIV/0!	#DIV/0!
																						#DIV/0!	#N/A	#N/A		#NUM!		5												#DIV/0!	#DIV/0!	#DIV/0!	#DIV/0!	#DIV/0!	#DIV/0!	#DIV/0!	#DIV/0!	#DIV/0!	#DIV/0!
																						#DIV/0!	#N/A	#N/A		#NUM!		5												#DIV/0!	#DIV/0!	#DIV/0!	#DIV/0!	#DIV/0!	#DIV/0!	#DIV/0!	#DIV/0!	#DIV/0!	#DIV/0!
																						#DIV/0!	#N/A	#N/A		#NUM!		5												#DIV/0!	#DIV/0!	#DIV/0!	#DIV/0!	#DIV/0!	#DIV/0!	#DIV/0!	#DIV/0!	#DIV/0!	#DIV/0!
																						#DIV/0!	#N/A	#N/A		#NUM!		5												#DIV/0!	#DIV/0!	#DIV/0!	#DIV/0!	#DIV/0!	#DIV/0!	#DIV/0!	#DIV/0!	#DIV/0!	#DIV/0!
																						#DIV/0!	#N/A	#N/A		#NUM!		5												#DIV/0!	#DIV/0!	#DIV/0!	#DIV/0!	#DIV/0!	#DIV/0!	#DIV/0!	#DIV/0!	#DIV/0!	#DIV/0!
																						#DIV/0!	#N/A	#N/A		#NUM!		5												#DIV/0!	#DIV/0!	#DIV/0!	#DIV/0!	#DIV/0!	#DIV/0!	#DIV/0!	#DIV/0!	#DIV/0!	#DIV/0!
																						#DIV/0!	#N/A	#N/A		#NUM!		5												#DIV/0!	#DIV/0!	#DIV/0!	#DIV/0!	#DIV/0!	#DIV/0!	#DIV/0!	#DIV/0!	#DIV/0!	#DIV/0!
																						#DIV/0!	#N/A	#N/A		#NUM!		5
																						#DIV/0!	#N/A	#N/A		#NUM!		5												1/s	0	0	0	0	0	0	0	0	0
																						#DIV/0!	#N/A	#N/A		#NUM!		5											1	#N/A	#N/A	#N/A	#N/A	#N/A	#N/A	#N/A	#N/A	#N/A	#N/A
																						#DIV/0!	#N/A	#N/A		#NUM!		5											2	#N/A	#N/A	#N/A	#N/A	#N/A	#N/A	#N/A	#N/A	#N/A	#N/A
																						#DIV/0!	#N/A	#N/A		#NUM!		5											3	#N/A	#N/A	#N/A	#N/A	#N/A	#N/A	#N/A	#N/A	#N/A	#N/A
																						#DIV/0!	#N/A	#N/A		#NUM!		5											4	#N/A	#N/A	#N/A	#N/A	#N/A	#N/A	#N/A	#N/A	#N/A	#N/A
																						#DIV/0!	#N/A	#N/A		#NUM!		5											5	#N/A	#N/A	#N/A	#N/A	#N/A	#N/A	#N/A	#N/A	#N/A	#N/A
																						#DIV/0!	#N/A	#N/A		#NUM!		5											6	#N/A	#N/A	#N/A	#N/A	#N/A	#N/A	#N/A	#N/A	#N/A	#N/A
																						#DIV/0!	#N/A	#N/A		#NUM!		5											7	#N/A	#N/A	#N/A	#N/A	#N/A	#N/A	#N/A	#N/A	#N/A	#N/A
																						#DIV/0!	#N/A	#N/A		#NUM!		5											8	#N/A	#N/A	#N/A	#N/A	#N/A	#N/A	#N/A	#N/A	#N/A	#N/A
																						#DIV/0!	#N/A	#N/A		#NUM!		5											9	#N/A	#N/A	#N/A	#N/A	#N/A	#N/A	#N/A	#N/A	#N/A	#N/A
																						#DIV/0!	#N/A	#N/A		#NUM!		5											10	#N/A	#N/A	#N/A	#N/A	#N/A	#N/A	#N/A	#N/A	#N/A	#N/A
																						#DIV/0!	#N/A	#N/A		#NUM!		5											11	#N/A	#N/A	#N/A	#N/A	#N/A	#N/A	#N/A	#N/A	#N/A	#N/A
																						#DIV/0!	#N/A	#N/A		#NUM!		5											12	#N/A	#N/A	#N/A	#N/A	#N/A	#N/A	#N/A	#N/A	#N/A	#N/A
																						#DIV/0!	#N/A	#N/A		#NUM!		5											13	#N/A	#N/A	#N/A	#N/A	#N/A	#N/A	#N/A	#N/A	#N/A	#N/A
																						#DIV/0!	#N/A	#N/A		#NUM!		5											14	#N/A	#N/A	#N/A	#N/A	#N/A	#N/A	#N/A	#N/A	#N/A	#N/A
																						#DIV/0!	#N/A	#N/A		#NUM!		5											15	#N/A	#N/A	#N/A	#N/A	#N/A	#N/A	#N/A	#N/A	#N/A	#N/A
																						#DIV/0!	#N/A	#N/A		#NUM!		5
																						#DIV/0!	#N/A	#N/A		#NUM!		5
																						#DIV/0!	#N/A	#N/A		#NUM!		5
																						#DIV/0!	#N/A	#N/A		#NUM!		5
																						#DIV/0!	#N/A	#N/A		#NUM!		5
																						#DIV/0!	#N/A	#N/A		#NUM!		5
																						#DIV/0!	#N/A	#N/A		#NUM!		5
																						#DIV/0!	#N/A	#N/A		#NUM!		5
																						#DIV/0!	#N/A	#N/A		#NUM!		5
																						#DIV/0!	#N/A	#N/A		#NUM!		5
																						#DIV/0!	#N/A	#N/A		#NUM!		5
																						#DIV/0!	#N/A	#N/A		#NUM!		5
																						#DIV/0!	#N/A	#N/A		#NUM!		5
																						#DIV/0!	#N/A	#N/A		#NUM!		5
																						#DIV/0!	#N/A	#N/A		#NUM!		5
																						#DIV/0!	#N/A	#N/A		#NUM!		5
																						#DIV/0!	#N/A	#N/A		#NUM!		5
																						#DIV/0!	#N/A	#N/A		#NUM!		5
																						#DIV/0!	#N/A	#N/A		#NUM!		5
																						#DIV/0!	#N/A	#N/A		#NUM!		5
																						#DIV/0!	#N/A	#N/A		#NUM!		5
																						#DIV/0!	#N/A	#N/A		#NUM!		5
																						#DIV/0!	#N/A	#N/A		#NUM!		5
																						#DIV/0!	#N/A	#N/A		#NUM!		5
																						#DIV/0!	#N/A	#N/A		#NUM!		5
																						#DIV/0!	#N/A	#N/A		#NUM!		5
																						#DIV/0!	#N/A	#N/A		#NUM!		5
																						#DIV/0!	#N/A	#N/A		#NUM!		5
																						#DIV/0!	#N/A	#N/A		#NUM!		5
																						#DIV/0!	#N/A	#N/A		#NUM!		5
																						#DIV/0!	#N/A	#N/A		#NUM!		5
																						#DIV/0!	#N/A	#N/A		#NUM!		5
																						#DIV/0!	#N/A	#N/A		#NUM!		5
																						#DIV/0!	#N/A	#N/A		#NUM!		5
																						#DIV/0!	#N/A	#N/A		#NUM!		5
																						#DIV/0!	#N/A	#N/A		#NUM!		5
																						#DIV/0!	#N/A	#N/A		#NUM!		5
																						#DIV/0!	#N/A	#N/A		#NUM!		5
																						#DIV/0!	#N/A	#N/A		#NUM!		5
																						#DIV/0!	#N/A	#N/A		#NUM!		5
																						#DIV/0!	#N/A	#N/A		#NUM!		5
																						#DIV/0!	#N/A	#N/A		#NUM!		5
																						#DIV/0!	#N/A	#N/A		#NUM!		5
																						#DIV/0!	#N/A	#N/A		#NUM!		5
																						#DIV/0!	#N/A	#N/A		#NUM!		5
																						#DIV/0!	#N/A	#N/A		#NUM!		5
																						#DIV/0!	#N/A	#N/A		#NUM!		5
																						#DIV/0!	#N/A	#N/A		#NUM!		5
																						#DIV/0!	#N/A	#N/A		#NUM!		5
																						#DIV/0!	#N/A	#N/A		#NUM!		5
																						#DIV/0!	#N/A	#N/A		#NUM!		5
																						#DIV/0!	#N/A	#N/A		#NUM!		5
																						#DIV/0!	#N/A	#N/A		#NUM!		5
																						#DIV/0!	#N/A	#N/A		#NUM!		5
																						#DIV/0!	#N/A	#N/A		#NUM!		5
																						#DIV/0!	#N/A	#N/A		#NUM!		5
																						#DIV/0!	#N/A	#N/A		#NUM!		5
																						#DIV/0!	#N/A	#N/A		#NUM!		5
																						#DIV/0!	#N/A	#N/A		#NUM!		5
																						#DIV/0!	#N/A	#N/A		#NUM!		5
																						#DIV/0!	#N/A	#N/A		#NUM!		5
																						#DIV/0!	#N/A	#N/A		#NUM!		5
																						#DIV/0!	#N/A	#N/A		#NUM!		5
																						#DIV/0!	#N/A	#N/A		#NUM!		5
																						#DIV/0!	#N/A	#N/A		#NUM!		5
																						#DIV/0!	#N/A	#N/A		#NUM!		5
																						#DIV/0!	#N/A	#N/A		#NUM!		5
																						#DIV/0!	#N/A	#N/A		#NUM!		5
																						#DIV/0!	#N/A	#N/A		#NUM!		5
																						#DIV/0!	#N/A	#N/A		#NUM!		5
																						#DIV/0!	#N/A	#N/A		#NUM!		5
																						#DIV/0!	#N/A	#N/A		#NUM!		5
																						#DIV/0!	#N/A	#N/A		#NUM!		5
																						#DIV/0!	#N/A	#N/A		#NUM!		5
																						#DIV/0!	#N/A	#N/A		#NUM!		5
																						#DIV/0!	#N/A	#N/A		#NUM!		5
																						#DIV/0!	#N/A	#N/A		#NUM!		5
																						#DIV/0!	#N/A	#N/A		#NUM!		5
																						#DIV/0!	#N/A	#N/A		#NUM!		5
																						#DIV/0!	#N/A	#N/A		#NUM!		5
																						#DIV/0!	#N/A	#N/A		#NUM!		5
																						#DIV/0!	#N/A	#N/A		#NUM!		5
																						#DIV/0!	#N/A	#N/A		#NUM!		5
																						#DIV/0!	#N/A	#N/A		#NUM!		5
																						#DIV/0!	#N/A	#N/A		#NUM!		5
																						#DIV/0!	#N/A	#N/A		#NUM!		5
																						#DIV/0!	#N/A	#N/A		#NUM!		5
																						#DIV/0!	#N/A	#N/A		#NUM!		5
																						#DIV/0!	#N/A	#N/A		#NUM!		5
																						#DIV/0!	#N/A	#N/A		#NUM!		5
																						#DIV/0!	#N/A	#N/A		#NUM!		5
																						#DIV/0!	#N/A	#N/A		#NUM!		5
																						#DIV/0!	#N/A	#N/A		#NUM!		5
																						#DIV/0!	#N/A	#N/A		#NUM!		5
																						#DIV/0!	#N/A	#N/A		#NUM!		5
																						#DIV/0!	#N/A	#N/A		#NUM!		5
																						#DIV/0!	#N/A	#N/A		#NUM!		5
																						#DIV/0!	#N/A	#N/A		#NUM!		5
																						#DIV/0!	#N/A	#N/A		#NUM!		5
																						#DIV/0!	#N/A	#N/A		#NUM!		5
																						#DIV/0!	#N/A	#N/A		#NUM!		5
																						#DIV/0!	#N/A	#N/A		#NUM!		5
																						#DIV/0!	#N/A	#N/A		#NUM!		5
																						#DIV/0!	#N/A	#N/A		#NUM!		5
																						#DIV/0!	#N/A	#N/A		#NUM!		5
																						#DIV/0!	#N/A	#N/A		#NUM!		5
																						#DIV/0!	#N/A	#N/A		#NUM!		5
																						#DIV/0!	#N/A	#N/A		#NUM!		5
																						#DIV/0!	#N/A	#N/A		#NUM!		5
																						#DIV/0!	#N/A	#N/A		#NUM!		5
																						#DIV/0!	#N/A	#N/A		#NUM!		5
																						#DIV/0!	#N/A	#N/A		#NUM!		5
																						#DIV/0!	#N/A	#N/A		#NUM!		5
																						#DIV/0!	#N/A	#N/A		#NUM!		5
																						#DIV/0!	#N/A	#N/A		#NUM!		5
																						#DIV/0!	#N/A	#N/A		#NUM!		5
																						#DIV/0!	#N/A	#N/A		#NUM!		5
																						#DIV/0!	#N/A	#N/A		#NUM!		5
																						#DIV/0!	#N/A	#N/A		#NUM!		5
																						#DIV/0!	#N/A	#N/A		#NUM!		5
																						#DIV/0!	#N/A	#N/A		#NUM!		5
																						#DIV/0!	#N/A	#N/A		#NUM!		5
																						#DIV/0!	#N/A	#N/A		#NUM!		5
																						#DIV/0!	#N/A	#N/A		#NUM!		5
																						#DIV/0!	#N/A	#N/A		#NUM!		5
																						#DIV/0!	#N/A	#N/A		#NUM!		5
																						#DIV/0!	#N/A	#N/A		#NUM!		5
																						#DIV/0!	#N/A	#N/A		#NUM!		5
																						#DIV/0!	#N/A	#N/A		#NUM!		5
																						#DIV/0!	#N/A	#N/A		#NUM!		5
																						#DIV/0!	#N/A	#N/A		#NUM!		5
																						#DIV/0!	#N/A	#N/A		#NUM!		5
																						#DIV/0!	#N/A	#N/A		#NUM!		5
																						#DIV/0!	#N/A	#N/A		#NUM!		5
																						#DIV/0!	#N/A	#N/A		#NUM!		5
																						#DIV/0!	#N/A	#N/A		#NUM!		5
																						#DIV/0!	#N/A	#N/A		#NUM!		5
																						#DIV/0!	#N/A	#N/A		#NUM!		5
																						#DIV/0!	#N/A	#N/A		#NUM!		5
																						#DIV/0!	#N/A	#N/A		#NUM!		5
																						#DIV/0!	#N/A	#N/A		#NUM!		5
																						#DIV/0!	#N/A	#N/A		#NUM!		5
																						#DIV/0!	#N/A	#N/A		#NUM!		5
																						#DIV/0!	#N/A	#N/A		#NUM!		5
																						#DIV/0!	#N/A	#N/A		#NUM!		5
																						#DIV/0!	#N/A	#N/A		#NUM!		5
																						#DIV/0!	#N/A	#N/A		#NUM!		5
																						#DIV/0!	#N/A	#N/A		#NUM!		5
																						#DIV/0!	#N/A	#N/A		#NUM!		5
																						#DIV/0!	#N/A	#N/A		#NUM!		5
																						#DIV/0!	#N/A	#N/A		#NUM!		5
																						#DIV/0!	#N/A	#N/A		#NUM!		5
																						#DIV/0!	#N/A	#N/A		#NUM!		5
																						#DIV/0!	#N/A	#N/A		#NUM!		5
																						#DIV/0!	#N/A	#N/A		#NUM!		5
																						#DIV/0!	#N/A	#N/A		#NUM!		5
																						#DIV/0!	#N/A	#N/A		#NUM!		5
																						#DIV/0!	#N/A	#N/A		#NUM!		5
																						#DIV/0!	#N/A	#N/A		#NUM!		5
																						#DIV/0!	#N/A	#N/A		#NUM!		5
																						#DIV/0!	#N/A	#N/A		#NUM!		5
																						#DIV/0!	#N/A	#N/A		#NUM!		5
																						#DIV/0!	#N/A	#N/A		#NUM!		5
																						#DIV/0!	#N/A	#N/A		#NUM!		5
																						#DIV/0!	#N/A	#N/A		#NUM!		5
																						#DIV/0!	#N/A	#N/A		#NUM!		5
																						#DIV/0!	#N/A	#N/A		#NUM!		5
																						#DIV/0!	#N/A	#N/A		#NUM!		5
																						#DIV/0!	#N/A	#N/A		#NUM!		5
																						#DIV/0!	#N/A	#N/A		#NUM!		5
																						#DIV/0!	#N/A	#N/A		#NUM!		5
																						#DIV/0!	#N/A	#N/A		#NUM!		5
																						#DIV/0!	#N/A	#N/A		#NUM!		5
																						#DIV/0!	#N/A	#N/A		#NUM!		5
																						#DIV/0!	#N/A	#N/A		#NUM!		5
																						#DIV/0!	#N/A	#N/A		#NUM!		5
																						#DIV/0!	#N/A	#N/A		#NUM!		5
[truncated: 54 more columns]
