# Supplementary material for: Comparing enzyme activity modifier equations through the development of global data fitting templates in Excel
Source: PeerJ. 2018 Dec 14;6:e6082. doi: 10.7717/peerj.6082 (PMC6296338; doi:10.7717/peerj.6082)
Supplement: Supplemental Information 5 [file peerj-06-6082-s005.xlsx]

## Sheet: Raw data and fitting summary
		No Inhibitor	[I]1	[I]2	[I]3	[I]4	[I]5	[I]6	[I]7	[I]8	[I]9	[I]10	[I]11	[I]12	[I]13	[I]14	[I]15
		0	0.05	0.1	0.25
[S]1	1.25	0.63857	0.519994	0.450106	0.326797
[S]2	0.625	0.547915	0.441306	0.365898	0.251193
[S]3	0.25	0.373134	0.285201	0.233198	0.143266
[S]4	0.125	0.25	0.180897	0.141201	0.0834725
[S]5	0.0625	0.160256	0.108295	0.0847458	0.0501002
[S]6
[S]7
[S]8
[S]9
[S]10
[S]11
[S]12
[S]13
[S]14
[S]15
		Direct linear plot Km, Vmax estimates
							0.273648	1.25	0.634934	1	1	1.25	0.634934	1.25	0.634934
		Km	0.248921				0.244743	0.625	0.544509	1	1	0.625	0.544509	0.625	0.544509
		Vmax	0.761373					0.25	0.381509	1	1	0.25	0.381509	0.25	0.381509
								0.125	0.254523	1	1	0.125	0.254523	0.125	0.254523
	Ki estimate based on linear decrease in activity							0.0625	0.152802	1	1	0.0625	0.152802	0.0625	0.152802
								0	0	#DIV/0!	#DIV/0!	#DIV/0!	#DIV/0!	#N/A	#N/A
		Ki	0.273648					0	0	#DIV/0!	#DIV/0!	#DIV/0!	#DIV/0!	#N/A	#N/A
								0	0	#DIV/0!	#DIV/0!	#DIV/0!	#DIV/0!	#N/A	#N/A
								0	0	#DIV/0!	#DIV/0!	#DIV/0!	#DIV/0!	#N/A	#N/A
								0	0	#DIV/0!	#DIV/0!	#DIV/0!	#DIV/0!	#N/A	#N/A
								0	0	#DIV/0!	#DIV/0!	#DIV/0!	#DIV/0!	#N/A	#N/A
								0	0	#DIV/0!	#DIV/0!	#DIV/0!	#DIV/0!	#N/A	#N/A
								0	0	#DIV/0!	#DIV/0!	#DIV/0!	#DIV/0!	#N/A	#N/A
								0	0	#DIV/0!	#DIV/0!	#DIV/0!	#DIV/0!	#N/A	#N/A
								0	0	#DIV/0!	#DIV/0!	#DIV/0!	#DIV/0!	#N/A	#N/A
			Km	Km2	Vmax	Vmax2	Ki	aKi	RSS	RSE	n	k	BIC
		Non-competitive	0.318216		0.820346		0.208432		0.00390397	0.015154	20	3	-70.2874			Mixed Non-competitive fit values	Km	Vmax	Ki	aKi	RSS
		Competitive	0.203425		0.705438		0.0534563		0.00690438	0.0201529	20	3	-65.335			Reported Ki Pintus et al. (2015)	0.250354	0.768355	0.097	0.33	0.000717047
		Uncompetitive	0.419652		0.88849		0.13595		0.0201787	0.0344526	20	3	-56.0197			Best fit	0.25139	0.761235	0.098979	0.373371	0.000436199
		Mixed Non-competitive	0.25139		0.761235		0.098979	0.373371	0.000436199	0.00522134	20	4	-88.0228
		Modifier equation	0.251956	0.851485	0.764245	0.0777382	0.309954		0.000361787	0.00491112	20	5	-88.3464
													Residual distribution
													Non-competitive	Competitive	Uncompetitive	Mixed Non-competitive	Modifier equation
												Minimum value	-0.0295006	-0.0318661	-0.0469252	-0.00868348	-0.00835811
												First quartile	-0.0053051	-0.0159123	-0.0175461	-0.00389817	-0.00320096
												Median value	0.00357284	-0.0110581	0.00257049	-0.000530891	-0.00110276
					Non-competitive	Competitive	Uncompetitive	Mixed Non-competitive	Modifier equation			Third quartile	0.0108159	0.0081105	0.026714	0.00273068	0.00273065
				Q1	-0.0053051	-0.0159123	-0.0175461	-0.00389817	-0.00320096			Maximum value	0.0217191	0.0398874	0.059922	0.00988551	0.00749928
				Min	-0.0295006	-0.0318661	-0.0469252	-0.00868348	-0.00835811
				Median	0.00357284	-0.0110581	0.00257049	-0.000530891	-0.00110276
				Max	0.0217191	0.0398874	0.059922	0.00988551	0.00749928
				Q3	0.0108159	0.0081105	0.026714	0.00273068	0.00273065
	Non-competitive
	Km	0.318216
	Vmax	0.820346
	Ki	0.208432
	RSS	0.00390397
	Competitive
	Km	0.203425
	Vmax	0.705438
	Ki	0.0534563
	RSS	0.00690438
	Uncompetitive
	Km	0.419652
	Vmax	0.88849
	Ki	0.13595
	RSS	0.0201787
	Mixed Non-competitive
	Km	0.25139
	Vmax	0.761235
	Ki	0.098979
	aKi	0.373371
	RSS	0.000436199
	Modifier equation
	Km	0.251956
	Km2	0.851485
	Vmax	0.764245
	Vmax2	0.0777382
	Ki	0.309954
	RSS	0.000361787

## Sheet: modified direct linear plot
Km/Vmax direct plot
									Intercept points x-axis																				Intercept points x-axis
										Line 1	Line 2	Line 3	Line 4	Line 5	Line 6	Line 7	Line 8	Line 9	Line 10	Line 11	Line 12	Line 13	Line 14	Line 15						Line 1	Line 2	Line 3	Line 4	Line 5	Line 6	Line 7	Line 8	Line 9	Line 10	Line 11	Line 12	Line 13	Line 14	Line 15
			x-intercept	y-interecept					Line 1																				Line 1
[Substrate]		v	[Substrate]/v	1/v					Line 2	0.323875																			Line 2	0.323875
1.25		0.63857	1.9575	1.566					Line 3	0.348125	0.356208																		Line 3	0.348125	0.356208
0.625		0.547915	1.14069	1.8251					Line 4	0.338056	0.339828	0.33																	Line 4	0.338056	0.339828	0.33
0.25		0.373134	0.67	2.68					Line 5	0.3075	0.30659	0.296667	0.28																Line 5	0.3075	0.30659	0.296667	0.28
0.125		0.25	0.5	4					Line 6	#DIV/0!	#DIV/0!	#DIV/0!	#DIV/0!	#DIV/0!															Line 6
0.0625		0.160256	0.39	6.24					Line 7	#DIV/0!	#DIV/0!	#DIV/0!	#DIV/0!	#DIV/0!	#DIV/0!														Line 7
0		0	#DIV/0!	#DIV/0!					Line 8	#DIV/0!	#DIV/0!	#DIV/0!	#DIV/0!	#DIV/0!	#DIV/0!	#DIV/0!													Line 8
0		0	#DIV/0!	#DIV/0!					Line 9	#DIV/0!	#DIV/0!	#DIV/0!	#DIV/0!	#DIV/0!	#DIV/0!	#DIV/0!	#DIV/0!												Line 9
0		0	#DIV/0!	#DIV/0!					Line 10	#DIV/0!	#DIV/0!	#DIV/0!	#DIV/0!	#DIV/0!	#DIV/0!	#DIV/0!	#DIV/0!	#DIV/0!											Line 10
0		0	#DIV/0!	#DIV/0!					Line 11	#DIV/0!	#DIV/0!	#DIV/0!	#DIV/0!	#DIV/0!	#DIV/0!	#DIV/0!	#DIV/0!	#DIV/0!	#DIV/0!										Line 11
0		0	#DIV/0!	#DIV/0!					Line 12	#DIV/0!	#DIV/0!	#DIV/0!	#DIV/0!	#DIV/0!	#DIV/0!	#DIV/0!	#DIV/0!	#DIV/0!	#DIV/0!	#DIV/0!									Line 12
0		0	#DIV/0!	#DIV/0!					Line 13	#DIV/0!	#DIV/0!	#DIV/0!	#DIV/0!	#DIV/0!	#DIV/0!	#DIV/0!	#DIV/0!	#DIV/0!	#DIV/0!	#DIV/0!	#DIV/0!								Line 13
0		0	#DIV/0!	#DIV/0!					Line 14	#DIV/0!	#DIV/0!	#DIV/0!	#DIV/0!	#DIV/0!	#DIV/0!	#DIV/0!	#DIV/0!	#DIV/0!	#DIV/0!	#DIV/0!	#DIV/0!	#DIV/0!							Line 14
0		0	#DIV/0!	#DIV/0!					Line 15	#DIV/0!	#DIV/0!	#DIV/0!	#DIV/0!	#DIV/0!	#DIV/0!	#DIV/0!	#DIV/0!	#DIV/0!	#DIV/0!	#DIV/0!	#DIV/0!	#DIV/0!	#DIV/0!						Line 15
0		0	#DIV/0!	#DIV/0!
0		0	#DIV/0!	#DIV/0!
																														Km/Vmax (x-axis):	0.326937		Km:	0.248921
																														Standard dev:	0.0243691
Line 1	x	y
	0	1.566		Slope:	-0.8
	1.9575	0		y-intercept:	1.566				1/Intercept points y-axis																				1/Intercept points y-axis
										Line 1	Line 2	Line 3	Line 4	Line 5	Line 6	Line 7	Line 8	Line 9	Line 10	Line 11	Line 12	Line 13	Line 14	Line 15						Line 1	Line 2	Line 3	Line 4	Line 5	Line 6	Line 7	Line 8	Line 9	Line 10	Line 11	Line 12	Line 13	Line 14	Line 15
Line 2	x	y							Line 1																				Line 1
	0	1.8251		Slope:	-1.6				Line 2	0.765169																			Line 2	0.765169
	1.14069	0		y-intercept:	1.8251				Line 3	0.776699	0.796707																		Line 3	0.776699	0.796707
									Line 4	0.77187	0.780412	0.735294																	Line 4	0.77187	0.780412	0.735294
Line 3	x	y							Line 5	0.757576	0.749313	0.669643	0.568182																Line 5	0.757576	0.749313	0.669643	0.568182
	0	2.68		Slope:	-4				Line 6	#DIV/0!	#DIV/0!	#DIV/0!	#DIV/0!	#DIV/0!															Line 6
	0.67	0		y-intercept:	2.68				Line 7	#DIV/0!	#DIV/0!	#DIV/0!	#DIV/0!	#DIV/0!	#DIV/0!														Line 7
									Line 8	#DIV/0!	#DIV/0!	#DIV/0!	#DIV/0!	#DIV/0!	#DIV/0!	#DIV/0!													Line 8
Line 4	x	y							Line 9	#DIV/0!	#DIV/0!	#DIV/0!	#DIV/0!	#DIV/0!	#DIV/0!	#DIV/0!	#DIV/0!												Line 9
	0	4		Slope:	-8				Line 10	#DIV/0!	#DIV/0!	#DIV/0!	#DIV/0!	#DIV/0!	#DIV/0!	#DIV/0!	#DIV/0!	#DIV/0!											Line 10
	0.5	0		y-intercept:	4				Line 11	#DIV/0!	#DIV/0!	#DIV/0!	#DIV/0!	#DIV/0!	#DIV/0!	#DIV/0!	#DIV/0!	#DIV/0!	#DIV/0!										Line 11
									Line 12	#DIV/0!	#DIV/0!	#DIV/0!	#DIV/0!	#DIV/0!	#DIV/0!	#DIV/0!	#DIV/0!	#DIV/0!	#DIV/0!	#DIV/0!									Line 12
Line 5	x	y							Line 13	#DIV/0!	#DIV/0!	#DIV/0!	#DIV/0!	#DIV/0!	#DIV/0!	#DIV/0!	#DIV/0!	#DIV/0!	#DIV/0!	#DIV/0!	#DIV/0!								Line 13
	0	6.24		Slope:	-16				Line 14	#DIV/0!	#DIV/0!	#DIV/0!	#DIV/0!	#DIV/0!	#DIV/0!	#DIV/0!	#DIV/0!	#DIV/0!	#DIV/0!	#DIV/0!	#DIV/0!	#DIV/0!							Line 14
	0.39	0		y-intercept:	6.24				Line 15	#DIV/0!	#DIV/0!	#DIV/0!	#DIV/0!	#DIV/0!	#DIV/0!	#DIV/0!	#DIV/0!	#DIV/0!	#DIV/0!	#DIV/0!	#DIV/0!	#DIV/0!	#DIV/0!						Line 15
Line 6	x	y
	0	#DIV/0!		Slope:	#VALUE!
	#DIV/0!	0		y-intercept:	#DIV/0!
Line 7	x	y																												Vmax:	0.761373
	0	#DIV/0!		Slope:	#VALUE!																									Standard dev:	0.068839
	#DIV/0!	0		y-intercept:	#DIV/0!
Line 8	x	y
	0	#DIV/0!		Slope:	#VALUE!
	#DIV/0!	0		y-intercept:	#DIV/0!
Line 9	x	y
	0	#DIV/0!		Slope:	#VALUE!
	#DIV/0!	0		y-intercept:	#DIV/0!
Line 10	x	y
	0	#DIV/0!		Slope:	#VALUE!
	#DIV/0!	0		y-intercept:	#DIV/0!
Line 11	x	y										0	1.566	1.8251	2.68	4	6.24	#DIV/0!	#DIV/0!	#DIV/0!	#DIV/0!	#DIV/0!	#DIV/0!	#DIV/0!	#DIV/0!	#DIV/0!	#DIV/0!	0	0	0	0
	0	#DIV/0!		Slope:	#VALUE!							1.9575	0
	#DIV/0!	0		y-intercept:	#DIV/0!							1.14069		0
												0.67			0
Line 12	x	y										0.5				0
	0	#DIV/0!		Slope:	#VALUE!							0.39					0
	#DIV/0!	0		y-intercept:	#DIV/0!							#DIV/0!						0
												#DIV/0!							0
Line 13	x	y										#DIV/0!								0
	0	#DIV/0!		Slope:	#VALUE!							#DIV/0!									0
	#DIV/0!	0		y-intercept:	#DIV/0!							#DIV/0!										0
												#DIV/0!											0
Line 14	x	y										#DIV/0!												0
	0	#DIV/0!		Slope:	#VALUE!							#DIV/0!													0
	#DIV/0!	0		y-intercept:	#DIV/0!							#DIV/0!														0
												#DIV/0!															0
Line 15	x	y										0																0
	0	#DIV/0!		Slope:	#VALUE!							0																	0
	#DIV/0!	0		y-intercept:	#DIV/0!							0																		0
												0																			0

## Sheet: Non-competitive
																							Calculated values
		No Inhibitor	[I]1	[I]2	[I]3	[I]4	[I]5	[I]6	[I]7	[I]8	[I]9	[I]10	[I]11	[I]12	[I]13	[I]14	[I]15						No Inhibitor	[I]1	[I]2	[I]3	[I]4	[I]5	[I]6	[I]7	[I]8	[I]9	[I]10	[I]11	[I]12	[I]13	[I]14	[I]15
		0	0.05	0.1	0.25	0	0	0	0	0	0	0	0	0	0	0	0		Km	Vmax	Ki		0	0.05	0.1	0.25	0	0	0	0	0	0	0	0	0	0	0	0
[S]1	1.25	0.63857	0.519994	0.450106	0.326797	0	0	0	0	0	0	0	0	0	0	0	0		0.318216	0.820346	0.208432		0.653885	0.527375	0.441882	0.297297	#DIV/0!	#DIV/0!	#DIV/0!	#DIV/0!	#DIV/0!	#DIV/0!	#DIV/0!	#DIV/0!	#DIV/0!	#DIV/0!	#DIV/0!	#DIV/0!		0.653885	0.527375	0.441882	0.297297	0	0	0	0	0	0
[S]2	0.625	0.547915	0.441306	0.365898	0.251193	0	0	0	0	0	0	0	0	0	0	0	0						0.543583	0.438413	0.367342	0.247147	#DIV/0!	#DIV/0!	#DIV/0!	#DIV/0!	#DIV/0!	#DIV/0!	#DIV/0!	#DIV/0!	#DIV/0!	#DIV/0!	#DIV/0!	#DIV/0!		0.543583	0.438413	0.367342	0.247147	0	0	0	0	0	0
[S]3	0.25	0.373134	0.285201	0.233198	0.143266	0	0	0	0	0	0	0	0	0	0	0	0						0.360931	0.2911	0.243909	0.164102	#DIV/0!	#DIV/0!	#DIV/0!	#DIV/0!	#DIV/0!	#DIV/0!	#DIV/0!	#DIV/0!	#DIV/0!	#DIV/0!	#DIV/0!	#DIV/0!		0.360931	0.2911	0.243909	0.164102	0	0	0	0	0	0
[S]4	0.125	0.25	0.180897	0.141201	0.0834725	0	0	0	0	0	0	0	0	0	0	0	0						0.231362	0.186599	0.156349	0.105192	#DIV/0!	#DIV/0!	#DIV/0!	#DIV/0!	#DIV/0!	#DIV/0!	#DIV/0!	#DIV/0!	#DIV/0!	#DIV/0!	#DIV/0!	#DIV/0!		0.231362	0.186599	0.156349	0.105192	0	0	0	0	0	0
[S]5	0.0625	0.160256	0.108295	0.0847458	0.0501002	0	0	0	0	0	0	0	0	0	0	0	0						0.134672	0.108616	0.0910083	0.0612301	#DIV/0!	#DIV/0!	#DIV/0!	#DIV/0!	#DIV/0!	#DIV/0!	#DIV/0!	#DIV/0!	#DIV/0!	#DIV/0!	#DIV/0!	#DIV/0!		0.134672	0.108616	0.0910083	0.0612301	0	0	0	0	0	0
[S]6	0	0	0	0	0	0	0	0	0	0	0	0	0	0	0	0	0			Sum R2	0.00390397		#DIV/0!	#DIV/0!	#DIV/0!	#DIV/0!	#DIV/0!	#DIV/0!	#DIV/0!	#DIV/0!	#DIV/0!	#DIV/0!	#DIV/0!	#DIV/0!	#DIV/0!	#DIV/0!	#DIV/0!	#DIV/0!		0	0	0	0	0	0	0	0	0	0
[S]7	0	0	0	0	0	0	0	0	0	0	0	0	0	0	0	0	0			Sum residuals %	1.27307		#DIV/0!	#DIV/0!	#DIV/0!	#DIV/0!	#DIV/0!	#DIV/0!	#DIV/0!	#DIV/0!	#DIV/0!	#DIV/0!	#DIV/0!	#DIV/0!	#DIV/0!	#DIV/0!	#DIV/0!	#DIV/0!		0	0	0	0	0	0	0	0	0	0
[S]8	0	0	0	0	0	0	0	0	0	0	0	0	0	0	0	0	0						#DIV/0!	#DIV/0!	#DIV/0!	#DIV/0!	#DIV/0!	#DIV/0!	#DIV/0!	#DIV/0!	#DIV/0!	#DIV/0!	#DIV/0!	#DIV/0!	#DIV/0!	#DIV/0!	#DIV/0!	#DIV/0!		0	0	0	0	0	0	0	0	0	0
[S]9	0	0	0	0	0	0	0	0	0	0	0	0	0	0	0	0	0						#DIV/0!	#DIV/0!	#DIV/0!	#DIV/0!	#DIV/0!	#DIV/0!	#DIV/0!	#DIV/0!	#DIV/0!	#DIV/0!	#DIV/0!	#DIV/0!	#DIV/0!	#DIV/0!	#DIV/0!	#DIV/0!		0	0	0	0	0	0	0	0	0	0
[S]10	0	0	0	0	0	0	0	0	0	0	0	0	0	0	0	0	0						#DIV/0!	#DIV/0!	#DIV/0!	#DIV/0!	#DIV/0!	#DIV/0!	#DIV/0!	#DIV/0!	#DIV/0!	#DIV/0!	#DIV/0!	#DIV/0!	#DIV/0!	#DIV/0!	#DIV/0!	#DIV/0!		0	0	0	0	0	0	0	0	0	0
[S]11	0	0	0	0	0	0	0	0	0	0	0	0	0	0	0	0	0						#DIV/0!	#DIV/0!	#DIV/0!	#DIV/0!	#DIV/0!	#DIV/0!	#DIV/0!	#DIV/0!	#DIV/0!	#DIV/0!	#DIV/0!	#DIV/0!	#DIV/0!	#DIV/0!	#DIV/0!	#DIV/0!		0	0	0	0	0	0	0	0	0	0
[S]12	0	0	0	0	0	0	0	0	0	0	0	0	0	0	0	0	0						#DIV/0!	#DIV/0!	#DIV/0!	#DIV/0!	#DIV/0!	#DIV/0!	#DIV/0!	#DIV/0!	#DIV/0!	#DIV/0!	#DIV/0!	#DIV/0!	#DIV/0!	#DIV/0!	#DIV/0!	#DIV/0!		0	0	0	0	0	0	0	0	0	0
[S]13	0	0	0	0	0	0	0	0	0	0	0	0	0	0	0	0	0						#DIV/0!	#DIV/0!	#DIV/0!	#DIV/0!	#DIV/0!	#DIV/0!	#DIV/0!	#DIV/0!	#DIV/0!	#DIV/0!	#DIV/0!	#DIV/0!	#DIV/0!	#DIV/0!	#DIV/0!	#DIV/0!		0	0	0	0	0	0	0	0	0	0
[S]14	0	0	0	0	0	0	0	0	0	0	0	0	0	0	0	0	0						#DIV/0!	#DIV/0!	#DIV/0!	#DIV/0!	#DIV/0!	#DIV/0!	#DIV/0!	#DIV/0!	#DIV/0!	#DIV/0!	#DIV/0!	#DIV/0!	#DIV/0!	#DIV/0!	#DIV/0!	#DIV/0!		0	0	0	0	0	0	0	0	0	0
[S]15	0	0	0	0	0	0	0	0	0	0	0	0	0	0	0	0	0						#DIV/0!	#DIV/0!	#DIV/0!	#DIV/0!	#DIV/0!	#DIV/0!	#DIV/0!	#DIV/0!	#DIV/0!	#DIV/0!	#DIV/0!	#DIV/0!	#DIV/0!	#DIV/0!	#DIV/0!	#DIV/0!		0	0	0	0	0	0	0	0	0	0
	1	1	1	1	1	#DIV/0!	#DIV/0!	#DIV/0!	#DIV/0!	#DIV/0!	#DIV/0!	#DIV/0!	#DIV/0!	#DIV/0!	#DIV/0!	#DIV/0!	#DIV/0!																					1.25	1.25	0.653885	0.527375	0.441882	0.297297	#N/A	#N/A	#N/A	#N/A	#N/A	#N/A
	1	1	1	1	1	#DIV/0!	#DIV/0!	#DIV/0!	#DIV/0!	#DIV/0!	#DIV/0!	#DIV/0!	#DIV/0!	#DIV/0!	#DIV/0!	#DIV/0!	#DIV/0!					0.63857	0.63857	0.653885		0.0153152	0.0153152	1										0.625	0.625	0.543583	0.438413	0.367342	0.247147	#N/A	#N/A	#N/A	#N/A	#N/A	#N/A
	1	1	1	1	1	#DIV/0!	#DIV/0!	#DIV/0!	#DIV/0!	#DIV/0!	#DIV/0!	#DIV/0!	#DIV/0!	#DIV/0!	#DIV/0!	#DIV/0!	#DIV/0!					0.547915	0.547915	0.543583		-0.00433206	-0.00433206	1										0.25	0.25	0.360931	0.2911	0.243909	0.164102	#N/A	#N/A	#N/A	#N/A	#N/A	#N/A
	1	1	1	1	1	#DIV/0!	#DIV/0!	#DIV/0!	#DIV/0!	#DIV/0!	#DIV/0!	#DIV/0!	#DIV/0!	#DIV/0!	#DIV/0!	#DIV/0!	#DIV/0!					0.373134	0.373134	0.360931		-0.0122037	-0.0122037	1										0.125	0.125	0.231362	0.186599	0.156349	0.105192	#N/A	#N/A	#N/A	#N/A	#N/A	#N/A
	1	1	1	1	1	#DIV/0!	#DIV/0!	#DIV/0!	#DIV/0!	#DIV/0!	#DIV/0!	#DIV/0!	#DIV/0!	#DIV/0!	#DIV/0!	#DIV/0!	#DIV/0!					0.25	0.25	0.231362		-0.0186381	-0.0186381	1										0.0625	0.0625	0.134672	0.108616	0.0910083	0.0612301	#N/A	#N/A	#N/A	#N/A	#N/A	#N/A
	#DIV/0!	#DIV/0!	#DIV/0!	#DIV/0!	#DIV/0!	#DIV/0!	#DIV/0!	#DIV/0!	#DIV/0!	#DIV/0!	#DIV/0!	#DIV/0!	#DIV/0!	#DIV/0!	#DIV/0!	#DIV/0!	#DIV/0!					0.160256	0.160256	0.134672		-0.0255848	-0.0255848	1										#DIV/0!	#N/A	#N/A	#N/A	#N/A	#N/A	#N/A	#N/A	#N/A	#N/A	#N/A	#N/A
	#DIV/0!	#DIV/0!	#DIV/0!	#DIV/0!	#DIV/0!	#DIV/0!	#DIV/0!	#DIV/0!	#DIV/0!	#DIV/0!	#DIV/0!	#DIV/0!	#DIV/0!	#DIV/0!	#DIV/0!	#DIV/0!	#DIV/0!					#DIV/0!	#N/A	#N/A		#DIV/0!		1										#DIV/0!	#N/A	#N/A	#N/A	#N/A	#N/A	#N/A	#N/A	#N/A	#N/A	#N/A	#N/A
	#DIV/0!	#DIV/0!	#DIV/0!	#DIV/0!	#DIV/0!	#DIV/0!	#DIV/0!	#DIV/0!	#DIV/0!	#DIV/0!	#DIV/0!	#DIV/0!	#DIV/0!	#DIV/0!	#DIV/0!	#DIV/0!	#DIV/0!					#DIV/0!	#N/A	#N/A		#DIV/0!		1										#DIV/0!	#N/A	#N/A	#N/A	#N/A	#N/A	#N/A	#N/A	#N/A	#N/A	#N/A	#N/A
	#DIV/0!	#DIV/0!	#DIV/0!	#DIV/0!	#DIV/0!	#DIV/0!	#DIV/0!	#DIV/0!	#DIV/0!	#DIV/0!	#DIV/0!	#DIV/0!	#DIV/0!	#DIV/0!	#DIV/0!	#DIV/0!	#DIV/0!					#DIV/0!	#N/A	#N/A		#DIV/0!		1										#DIV/0!	#N/A	#N/A	#N/A	#N/A	#N/A	#N/A	#N/A	#N/A	#N/A	#N/A	#N/A
	#DIV/0!	#DIV/0!	#DIV/0!	#DIV/0!	#DIV/0!	#DIV/0!	#DIV/0!	#DIV/0!	#DIV/0!	#DIV/0!	#DIV/0!	#DIV/0!	#DIV/0!	#DIV/0!	#DIV/0!	#DIV/0!	#DIV/0!					#DIV/0!	#N/A	#N/A		#DIV/0!		1										#DIV/0!	#N/A	#N/A	#N/A	#N/A	#N/A	#N/A	#N/A	#N/A	#N/A	#N/A	#N/A
	#DIV/0!	#DIV/0!	#DIV/0!	#DIV/0!	#DIV/0!	#DIV/0!	#DIV/0!	#DIV/0!	#DIV/0!	#DIV/0!	#DIV/0!	#DIV/0!	#DIV/0!	#DIV/0!	#DIV/0!	#DIV/0!	#DIV/0!					#DIV/0!	#N/A	#N/A		#DIV/0!		1										#DIV/0!	#N/A	#N/A	#N/A	#N/A	#N/A	#N/A	#N/A	#N/A	#N/A	#N/A	#N/A
	#DIV/0!	#DIV/0!	#DIV/0!	#DIV/0!	#DIV/0!	#DIV/0!	#DIV/0!	#DIV/0!	#DIV/0!	#DIV/0!	#DIV/0!	#DIV/0!	#DIV/0!	#DIV/0!	#DIV/0!	#DIV/0!	#DIV/0!					#DIV/0!	#N/A	#N/A		#DIV/0!		1										#DIV/0!	#N/A	#N/A	#N/A	#N/A	#N/A	#N/A	#N/A	#N/A	#N/A	#N/A	#N/A
	#DIV/0!	#DIV/0!	#DIV/0!	#DIV/0!	#DIV/0!	#DIV/0!	#DIV/0!	#DIV/0!	#DIV/0!	#DIV/0!	#DIV/0!	#DIV/0!	#DIV/0!	#DIV/0!	#DIV/0!	#DIV/0!	#DIV/0!					#DIV/0!	#N/A	#N/A		#DIV/0!		1										#DIV/0!	#N/A	#N/A	#N/A	#N/A	#N/A	#N/A	#N/A	#N/A	#N/A	#N/A	#N/A
	#DIV/0!	#DIV/0!	#DIV/0!	#DIV/0!	#DIV/0!	#DIV/0!	#DIV/0!	#DIV/0!	#DIV/0!	#DIV/0!	#DIV/0!	#DIV/0!	#DIV/0!	#DIV/0!	#DIV/0!	#DIV/0!	#DIV/0!					#DIV/0!	#N/A	#N/A		#DIV/0!		1										#DIV/0!	#N/A	#N/A	#N/A	#N/A	#N/A	#N/A	#N/A	#N/A	#N/A	#N/A	#N/A
	#DIV/0!	#DIV/0!	#DIV/0!	#DIV/0!	#DIV/0!	#DIV/0!	#DIV/0!	#DIV/0!	#DIV/0!	#DIV/0!	#DIV/0!	#DIV/0!	#DIV/0!	#DIV/0!	#DIV/0!	#DIV/0!	#DIV/0!					#DIV/0!	#N/A	#N/A		#DIV/0!		1										#DIV/0!	#N/A	#N/A	#N/A	#N/A	#N/A	#N/A	#N/A	#N/A	#N/A	#N/A	#N/A
																						#DIV/0!	#N/A	#N/A		#DIV/0!		1
		1	1	1	1	0	0	0	0	0	0	0	0	0	0	0	0					0.519994	0.519994	0.527375		0.00738076	0.00738076	1											0.8	1.52932	1.89619	2.26305	3.36364	#N/A	#N/A	#N/A	#N/A	#N/A	#N/A
		1	1	1	1	0	0	0	0	0	0	0	0	0	0	0	0					0.441306	0.441306	0.438413		-0.00289279	-0.00289279	1											1.6	1.83965	2.28095	2.72226	4.04618	#N/A	#N/A	#N/A	#N/A	#N/A	#N/A
		1	1	1	1	0	0	0	0	0	0	0	0	0	0	0	0					0.285201	0.285201	0.2911		0.00589869	0.00589869	1											4	2.77062	3.43525	4.09988	6.09379	#N/A	#N/A	#N/A	#N/A	#N/A	#N/A
		1	1	1	1	0	0	0	0	0	0	0	0	0	0	0	0					0.180897	0.180897	0.186599		0.00570192	0.00570192	1											8	4.32223	5.35908	6.39593	9.50647	#N/A	#N/A	#N/A	#N/A	#N/A	#N/A
		1	1	1	1	0	0	0	0	0	0	0	0	0	0	0	0					0.108295	0.108295	0.108616		0.000320627	0.000320627	1											16	7.42547	9.20674	10.988	16.3318	#N/A	#N/A	#N/A	#N/A	#N/A	#N/A
		0	0	0	0	0	0	0	0	0	0	0	0	0	0	0	0					#DIV/0!	#N/A	#N/A		#DIV/0!		1											#N/A	#N/A	#N/A	#N/A	#N/A	#N/A	#N/A	#N/A	#N/A	#N/A	#N/A
		0	0	0	0	0	0	0	0	0	0	0	0	0	0	0	0					#DIV/0!	#N/A	#N/A		#DIV/0!		1											#N/A	#N/A	#N/A	#N/A	#N/A	#N/A	#N/A	#N/A	#N/A	#N/A	#N/A
		0	0	0	0	0	0	0	0	0	0	0	0	0	0	0	0					#DIV/0!	#N/A	#N/A		#DIV/0!		1											#N/A	#N/A	#N/A	#N/A	#N/A	#N/A	#N/A	#N/A	#N/A	#N/A	#N/A
		0	0	0	0	0	0	0	0	0	0	0	0	0	0	0	0					#DIV/0!	#N/A	#N/A		#DIV/0!		1											#N/A	#N/A	#N/A	#N/A	#N/A	#N/A	#N/A	#N/A	#N/A	#N/A	#N/A
		0	0	0	0	0	0	0	0	0	0	0	0	0	0	0	0					#DIV/0!	#N/A	#N/A		#DIV/0!		1											#N/A	#N/A	#N/A	#N/A	#N/A	#N/A	#N/A	#N/A	#N/A	#N/A	#N/A
		0	0	0	0	0	0	0	0	0	0	0	0	0	0	0	0					#DIV/0!	#N/A	#N/A		#DIV/0!		1											#N/A	#N/A	#N/A	#N/A	#N/A	#N/A	#N/A	#N/A	#N/A	#N/A	#N/A
		0	0	0	0	0	0	0	0	0	0	0	0	0	0	0	0					#DIV/0!	#N/A	#N/A		#DIV/0!		1											#N/A	#N/A	#N/A	#N/A	#N/A	#N/A	#N/A	#N/A	#N/A	#N/A	#N/A
		0	0	0	0	0	0	0	0	0	0	0	0	0	0	0	0					#DIV/0!	#N/A	#N/A		#DIV/0!		1											#N/A	#N/A	#N/A	#N/A	#N/A	#N/A	#N/A	#N/A	#N/A	#N/A	#N/A
		0	0	0	0	0	0	0	0	0	0	0	0	0	0	0	0					#DIV/0!	#N/A	#N/A		#DIV/0!		1											#N/A	#N/A	#N/A	#N/A	#N/A	#N/A	#N/A	#N/A	#N/A	#N/A	#N/A
		0	0	0	0	0	0	0	0	0	0	0	0	0	0	0	0					#DIV/0!	#N/A	#N/A		#DIV/0!		1											#N/A	#N/A	#N/A	#N/A	#N/A	#N/A	#N/A	#N/A	#N/A	#N/A	#N/A
																						0.450106	0.450106	0.441882		-0.00822422	-0.00822422	1
n	20																					0.365898	0.365898	0.367342		0.00144376	0.00144376	1												0.63857	0.519994	0.450106	0.326797	#DIV/0!	#DIV/0!	#DIV/0!	#DIV/0!	#DIV/0!	#DIV/0!
																						0.233198	0.233198	0.243909		0.0107112	0.0107112	1												0.547915	0.441306	0.365898	0.251193	#DIV/0!	#DIV/0!	#DIV/0!	#DIV/0!	#DIV/0!	#DIV/0!
																						0.141201	0.141201	0.156349		0.0151484	0.0151484	1												0.373134	0.285201	0.233198	0.143266	#DIV/0!	#DIV/0!	#DIV/0!	#DIV/0!	#DIV/0!	#DIV/0!
																						0.0847458	0.0847458	0.0910083		0.00626249	0.00626249	1												0.25	0.180897	0.141201	0.0834725	#DIV/0!	#DIV/0!	#DIV/0!	#DIV/0!	#DIV/0!	#DIV/0!
																						#DIV/0!	#N/A	#N/A		#DIV/0!		1												0.160256	0.108295	0.0847458	0.0501002	#DIV/0!	#DIV/0!	#DIV/0!	#DIV/0!	#DIV/0!	#DIV/0!
																						#DIV/0!	#N/A	#N/A		#DIV/0!		1												#DIV/0!	#DIV/0!	#DIV/0!	#DIV/0!	#DIV/0!	#DIV/0!	#DIV/0!	#DIV/0!	#DIV/0!	#DIV/0!
																						#DIV/0!	#N/A	#N/A		#DIV/0!		1												#DIV/0!	#DIV/0!	#DIV/0!	#DIV/0!	#DIV/0!	#DIV/0!	#DIV/0!	#DIV/0!	#DIV/0!	#DIV/0!
																						#DIV/0!	#N/A	#N/A		#DIV/0!		1												#DIV/0!	#DIV/0!	#DIV/0!	#DIV/0!	#DIV/0!	#DIV/0!	#DIV/0!	#DIV/0!	#DIV/0!	#DIV/0!
																						#DIV/0!	#N/A	#N/A		#DIV/0!		1												#DIV/0!	#DIV/0!	#DIV/0!	#DIV/0!	#DIV/0!	#DIV/0!	#DIV/0!	#DIV/0!	#DIV/0!	#DIV/0!
																						#DIV/0!	#N/A	#N/A		#DIV/0!		1												#DIV/0!	#DIV/0!	#DIV/0!	#DIV/0!	#DIV/0!	#DIV/0!	#DIV/0!	#DIV/0!	#DIV/0!	#DIV/0!
																						#DIV/0!	#N/A	#N/A		#DIV/0!		1												#DIV/0!	#DIV/0!	#DIV/0!	#DIV/0!	#DIV/0!	#DIV/0!	#DIV/0!	#DIV/0!	#DIV/0!	#DIV/0!
																						#DIV/0!	#N/A	#N/A		#DIV/0!		1												#DIV/0!	#DIV/0!	#DIV/0!	#DIV/0!	#DIV/0!	#DIV/0!	#DIV/0!	#DIV/0!	#DIV/0!	#DIV/0!
																						#DIV/0!	#N/A	#N/A		#DIV/0!		1												#DIV/0!	#DIV/0!	#DIV/0!	#DIV/0!	#DIV/0!	#DIV/0!	#DIV/0!	#DIV/0!	#DIV/0!	#DIV/0!
																						#DIV/0!	#N/A	#N/A		#DIV/0!		1												#DIV/0!	#DIV/0!	#DIV/0!	#DIV/0!	#DIV/0!	#DIV/0!	#DIV/0!	#DIV/0!	#DIV/0!	#DIV/0!
																						0.326797	0.326797	0.297297		-0.0295006	-0.0295006	1												#DIV/0!	#DIV/0!	#DIV/0!	#DIV/0!	#DIV/0!	#DIV/0!	#DIV/0!	#DIV/0!	#DIV/0!	#DIV/0!
																						0.251193	0.251193	0.247147		-0.0040464	-0.0040464	1
																						0.143266	0.143266	0.164102		0.0208351	0.0208351	1												1/s	0	0.05	0.1	0.25	0	0	0	0	0
																						0.0834725	0.0834725	0.105192		0.0217191	0.0217191	1											1	0.8	1.52932	1.89619	2.26305	3.36364	#N/A	#N/A	#N/A	#N/A	#N/A
																						0.0501002	0.0501002	0.0612301		0.0111299	0.0111299	1											2	1.6	1.83965	2.28095	2.72226	4.04618	#N/A	#N/A	#N/A	#N/A	#N/A
																						#DIV/0!	#N/A	#N/A		#DIV/0!		1											3	4	2.77062	3.43525	4.09988	6.09379	#N/A	#N/A	#N/A	#N/A	#N/A
																						#DIV/0!	#N/A	#N/A		#DIV/0!		1											4	8	4.32223	5.35908	6.39593	9.50647	#N/A	#N/A	#N/A	#N/A	#N/A
																						#DIV/0!	#N/A	#N/A		#DIV/0!		1											5	16	7.42547	9.20674	10.988	16.3318	#N/A	#N/A	#N/A	#N/A	#N/A
																						#DIV/0!	#N/A	#N/A		#DIV/0!		1											6	#N/A	#N/A	#N/A	#N/A	#N/A	#N/A	#N/A	#N/A	#N/A	#N/A
																						#DIV/0!	#N/A	#N/A		#DIV/0!		1											7	#N/A	#N/A	#N/A	#N/A	#N/A	#N/A	#N/A	#N/A	#N/A	#N/A
																						#DIV/0!	#N/A	#N/A		#DIV/0!		1											8	#N/A	#N/A	#N/A	#N/A	#N/A	#N/A	#N/A	#N/A	#N/A	#N/A
																						#DIV/0!	#N/A	#N/A		#DIV/0!		1											9	#N/A	#N/A	#N/A	#N/A	#N/A	#N/A	#N/A	#N/A	#N/A	#N/A
																						#DIV/0!	#N/A	#N/A		#DIV/0!		1											10	#N/A	#N/A	#N/A	#N/A	#N/A	#N/A	#N/A	#N/A	#N/A	#N/A
																						#DIV/0!	#N/A	#N/A		#DIV/0!		1											11	#N/A	#N/A	#N/A	#N/A	#N/A	#N/A	#N/A	#N/A	#N/A	#N/A
																						#DIV/0!	#N/A	#N/A		#DIV/0!		1											12	#N/A	#N/A	#N/A	#N/A	#N/A	#N/A	#N/A	#N/A	#N/A	#N/A
																						#DIV/0!	#N/A	#N/A		#DIV/0!		1											13	#N/A	#N/A	#N/A	#N/A	#N/A	#N/A	#N/A	#N/A	#N/A	#N/A
																						#DIV/0!	#N/A	#N/A		#DIV/0!		1											14	#N/A	#N/A	#N/A	#N/A	#N/A	#N/A	#N/A	#N/A	#N/A	#N/A
																						#DIV/0!	#N/A	#N/A		#DIV/0!		1											15	#N/A	#N/A	#N/A	#N/A	#N/A	#N/A	#N/A	#N/A	#N/A	#N/A
																						#DIV/0!	#N/A	#N/A		#DIV/0!		1
																						#DIV/0!	#N/A	#N/A		#DIV/0!		1
																						#DIV/0!	#N/A	#N/A		#DIV/0!		1
																						#DIV/0!	#N/A	#N/A		#DIV/0!		1
																						#DIV/0!	#N/A	#N/A		#DIV/0!		1
																						#DIV/0!	#N/A	#N/A		#DIV/0!		1
																						#DIV/0!	#N/A	#N/A		#DIV/0!		1
																						#DIV/0!	#N/A	#N/A		#DIV/0!		1
																						#DIV/0!	#N/A	#N/A		#DIV/0!		1
																						#DIV/0!	#N/A	#N/A		#DIV/0!		1
																						#DIV/0!	#N/A	#N/A		#DIV/0!		1
																						#DIV/0!	#N/A	#N/A		#DIV/0!		1
																						#DIV/0!	#N/A	#N/A		#DIV/0!		1
																						#DIV/0!	#N/A	#N/A		#DIV/0!		1
																						#DIV/0!	#N/A	#N/A		#DIV/0!		1
																						#DIV/0!	#N/A	#N/A		#DIV/0!		1
																						#DIV/0!	#N/A	#N/A		#DIV/0!		1
																						#DIV/0!	#N/A	#N/A		#DIV/0!		1
																						#DIV/0!	#N/A	#N/A		#DIV/0!		1
																						#DIV/0!	#N/A	#N/A		#DIV/0!		1
																						#DIV/0!	#N/A	#N/A		#DIV/0!		1
																						#DIV/0!	#N/A	#N/A		#DIV/0!		1
																						#DIV/0!	#N/A	#N/A		#DIV/0!		1
																						#DIV/0!	#N/A	#N/A		#DIV/0!		1
																						#DIV/0!	#N/A	#N/A		#DIV/0!		1
																						#DIV/0!	#N/A	#N/A		#DIV/0!		1
																						#DIV/0!	#N/A	#N/A		#DIV/0!		1
																						#DIV/0!	#N/A	#N/A		#DIV/0!		1
																						#DIV/0!	#N/A	#N/A		#DIV/0!		1
																						#DIV/0!	#N/A	#N/A		#DIV/0!		1
																						#DIV/0!	#N/A	#N/A		#DIV/0!		1
																						#DIV/0!	#N/A	#N/A		#DIV/0!		1
																						#DIV/0!	#N/A	#N/A		#DIV/0!		1
																						#DIV/0!	#N/A	#N/A		#DIV/0!		1
																						#DIV/0!	#N/A	#N/A		#DIV/0!		1
																						#DIV/0!	#N/A	#N/A		#DIV/0!		1
																						#DIV/0!	#N/A	#N/A		#DIV/0!		1
																						#DIV/0!	#N/A	#N/A		#DIV/0!		1
																						#DIV/0!	#N/A	#N/A		#DIV/0!		1
																						#DIV/0!	#N/A	#N/A		#DIV/0!		1
																						#DIV/0!	#N/A	#N/A		#DIV/0!		1
																						#DIV/0!	#N/A	#N/A		#DIV/0!		1
																						#DIV/0!	#N/A	#N/A		#DIV/0!		1
																						#DIV/0!	#N/A	#N/A		#DIV/0!		1
																						#DIV/0!	#N/A	#N/A		#DIV/0!		1
																						#DIV/0!	#N/A	#N/A		#DIV/0!		1
																						#DIV/0!	#N/A	#N/A		#DIV/0!		1
																						#DIV/0!	#N/A	#N/A		#DIV/0!		1
																						#DIV/0!	#N/A	#N/A		#DIV/0!		1
																						#DIV/0!	#N/A	#N/A		#DIV/0!		1
																						#DIV/0!	#N/A	#N/A		#DIV/0!		1
																						#DIV/0!	#N/A	#N/A		#DIV/0!		1
																						#DIV/0!	#N/A	#N/A		#DIV/0!		1
																						#DIV/0!	#N/A	#N/A		#DIV/0!		1
																						#DIV/0!	#N/A	#N/A		#DIV/0!		1
																						#DIV/0!	#N/A	#N/A		#DIV/0!		1
																						#DIV/0!	#N/A	#N/A		#DIV/0!		1
																						#DIV/0!	#N/A	#N/A		#DIV/0!		1
																						#DIV/0!	#N/A	#N/A		#DIV/0!		1
																						#DIV/0!	#N/A	#N/A		#DIV/0!		1
																						#DIV/0!	#N/A	#N/A		#DIV/0!		1
																						#DIV/0!	#N/A	#N/A		#DIV/0!		1
																						#DIV/0!	#N/A	#N/A		#DIV/0!		1
																						#DIV/0!	#N/A	#N/A		#DIV/0!		1
																						#DIV/0!	#N/A	#N/A		#DIV/0!		1
																						#DIV/0!	#N/A	#N/A		#DIV/0!		1
																						#DIV/0!	#N/A	#N/A		#DIV/0!		1
																						#DIV/0!	#N/A	#N/A		#DIV/0!		1
																						#DIV/0!	#N/A	#N/A		#DIV/0!		1
																						#DIV/0!	#N/A	#N/A		#DIV/0!		1
																						#DIV/0!	#N/A	#N/A		#DIV/0!		1
																						#DIV/0!	#N/A	#N/A		#DIV/0!		1
																						#DIV/0!	#N/A	#N/A		#DIV/0!		1
																						#DIV/0!	#N/A	#N/A		#DIV/0!		1
																						#DIV/0!	#N/A	#N/A		#DIV/0!		1
																						#DIV/0!	#N/A	#N/A		#DIV/0!		1
																						#DIV/0!	#N/A	#N/A		#DIV/0!		1
																						#DIV/0!	#N/A	#N/A		#DIV/0!		1
																						#DIV/0!	#N/A	#N/A		#DIV/0!		1
																						#DIV/0!	#N/A	#N/A		#DIV/0!		1
																						#DIV/0!	#N/A	#N/A		#DIV/0!		1
																						#DIV/0!	#N/A	#N/A		#DIV/0!		1
																						#DIV/0!	#N/A	#N/A		#DIV/0!		1
																						#DIV/0!	#N/A	#N/A		#DIV/0!		1
																						#DIV/0!	#N/A	#N/A		#DIV/0!		1
																						#DIV/0!	#N/A	#N/A		#DIV/0!		1
																						#DIV/0!	#N/A	#N/A		#DIV/0!		1
																						#DIV/0!	#N/A	#N/A		#DIV/0!		1
																						#DIV/0!	#N/A	#N/A		#DIV/0!		1
																						#DIV/0!	#N/A	#N/A		#DIV/0!		1
																						#DIV/0!	#N/A	#N/A		#DIV/0!		1
																						#DIV/0!	#N/A	#N/A		#DIV/0!		1
																						#DIV/0!	#N/A	#N/A		#DIV/0!		1
																						#DIV/0!	#N/A	#N/A		#DIV/0!		1
																						#DIV/0!	#N/A	#N/A		#DIV/0!		1
																						#DIV/0!	#N/A	#N/A		#DIV/0!		1
																						#DIV/0!	#N/A	#N/A		#DIV/0!		1
																						#DIV/0!	#N/A	#N/A		#DIV/0!		1
																						#DIV/0!	#N/A	#N/A		#DIV/0!		1
																						#DIV/0!	#N/A	#N/A		#DIV/0!		1
																						#DIV/0!	#N/A	#N/A		#DIV/0!		1
																						#DIV/0!	#N/A	#N/A		#DIV/0!		1
																						#DIV/0!	#N/A	#N/A		#DIV/0!		1
																						#DIV/0!	#N/A	#N/A		#DIV/0!		1
																						#DIV/0!	#N/A	#N/A		#DIV/0!		1
																						#DIV/0!	#N/A	#N/A		#DIV/0!		1
																						#DIV/0!	#N/A	#N/A		#DIV/0!		1
																						#DIV/0!	#N/A	#N/A		#DIV/0!		1
																						#DIV/0!	#N/A	#N/A		#DIV/0!		1
																						#DIV/0!	#N/A	#N/A		#DIV/0!		1
																						#DIV/0!	#N/A	#N/A		#DIV/0!		1
																						#DIV/0!	#N/A	#N/A		#DIV/0!		1
																						#DIV/0!	#N/A	#N/A		#DIV/0!		1
																						#DIV/0!	#N/A	#N/A		#DIV/0!		1
																						#DIV/0!	#N/A	#N/A		#DIV/0!		1
																						#DIV/0!	#N/A	#N/A		#DIV/0!		1
																						#DIV/0!	#N/A	#N/A		#DIV/0!		1
																						#DIV/0!	#N/A	#N/A		#DIV/0!		1
																						#DIV/0!	#N/A	#N/A		#DIV/0!		1
																						#DIV/0!	#N/A	#N/A		#DIV/0!		1
																						#DIV/0!	#N/A	#N/A		#DIV/0!		1
																						#DIV/0!	#N/A	#N/A		#DIV/0!		1
																						#DIV/0!	#N/A	#N/A		#DIV/0!		1
																						#DIV/0!	#N/A	#N/A		#DIV/0!		1
																						#DIV/0!	#N/A	#N/A		#DIV/0!		1
																						#DIV/0!	#N/A	#N/A		#DIV/0!		1
																						#DIV/0!	#N/A	#N/A		#DIV/0!		1
																						#DIV/0!	#N/A	#N/A		#DIV/0!		1
																						#DIV/0!	#N/A	#N/A		#DIV/0!		1
																						#DIV/0!	#N/A	#N/A		#DIV/0!		1
																						#DIV/0!	#N/A	#N/A		#DIV/0!		1
																						#DIV/0!	#N/A	#N/A		#DIV/0!		1
																						#DIV/0!	#N/A	#N/A		#DIV/0!		1
																						#DIV/0!	#N/A	#N/A		#DIV/0!		1
																						#DIV/0!	#N/A	#N/A		#DIV/0!		1
																						#DIV/0!	#N/A	#N/A		#DIV/0!		1
																						#DIV/0!	#N/A	#N/A		#DIV/0!		1
																						#DIV/0!	#N/A	#N/A		#DIV/0!		1
																						#DIV/0!	#N/A	#N/A		#DIV/0!		1
																						#DIV/0!	#N/A	#N/A		#DIV/0!		1
																						#DIV/0!	#N/A	#N/A		#DIV/0!		1
																						#DIV/0!	#N/A	#N/A		#DIV/0!		1
																						#DIV/0!	#N/A	#N/A		#DIV/0!		1
																						#DIV/0!	#N/A	#N/A		#DIV/0!		1
																						#DIV/0!	#N/A	#N/A		#DIV/0!		1
																						#DIV/0!	#N/A	#N/A		#DIV/0!		1
																						#DIV/0!	#N/A	#N/A		#DIV/0!		1
																						#DIV/0!	#N/A	#N/A		#DIV/0!		1
																						#DIV/0!	#N/A	#N/A		#DIV/0!		1
																						#DIV/0!	#N/A	#N/A		#DIV/0!		1
																						#DIV/0!	#N/A	#N/A		#DIV/0!		1
																						#DIV/0!	#N/A	#N/A		#DIV/0!		1
																						#DIV/0!	#N/A	#N/A		#DIV/0!		1
																						#DIV/0!	#N/A	#N/A		#DIV/0!		1
																						#DIV/0!	#N/A	#N/A		#DIV/0!		1
																						#DIV/0!	#N/A	#N/A		#DIV/0!		1
																						#DIV/0!	#N/A	#N/A		#DIV/0!		1
																						#DIV/0!	#N/A	#N/A		#DIV/0!		1
																						#DIV/0!	#N/A	#N/A		#DIV/0!		1
																						#DIV/0!	#N/A	#N/A		#DIV/0!		1
																						#DIV/0!	#N/A	#N/A		#DIV/0!		1
																						#DIV/0!	#N/A	#N/A		#DIV/0!		1
																						#DIV/0!	#N/A	#N/A		#DIV/0!		1
																						#DIV/0!	#N/A	#N/A		#DIV/0!		1
																						#DIV/0!	#N/A	#N/A		#DIV/0!		1
																						#DIV/0!	#N/A	#N/A		#DIV/0!		1
																						#DIV/0!	#N/A	#N/A		#DIV/0!		1
																						#DIV/0!	#N/A	#N/A		#DIV/0!		1
																						#DIV/0!	#N/A	#N/A		#DIV/0!		1
																						#DIV/0!	#N/A	#N/A		#DIV/0!		1
																						#DIV/0!	#N/A	#N/A		#DIV/0!		1
																						#DIV/0!	#N/A	#N/A		#DIV/0!		1
																						#DIV/0!	#N/A	#N/A		#DIV/0!		1
																						#DIV/0!	#N/A	#N/A		#DIV/0!		1
																						#DIV/0!	#N/A	#N/A		#DIV/0!		1
																						#DIV/0!	#N/A	#N/A		#DIV/0!		1
																						#DIV/0!	#N/A	#N/A		#DIV/0!		1
[truncated: 54 more columns]

## Sheet: Competitive
																							Calculated values
		No Inhibitor	[I]1	[I]2	[I]3	[I]4	[I]5	[I]6	[I]7	[I]8	[I]9	[I]10	[I]11	[I]12	[I]13	[I]14	[I]15						No Inhibitor	[I]1	[I]2	[I]3	[I]4	[I]5	[I]6	[I]7	[I]8	[I]9	[I]10	[I]11	[I]12	[I]13	[I]14	[I]15
		0	0.05	0.1	0.25	0	0	0	0	0	0	0	0	0	0	0	0		Km	Vmax	Ki		0	0.05	0.1	0.25	0	0	0	0	0	0	0	0	0	0	0	0
[S]1	1.25	0.63857	0.519994	0.450106	0.326797	0	0	0	0	0	0	0	0	0	0	0	0		0.203425	0.705438	0.0534563		0.606703	0.536472	0.480814	0.366685	#DIV/0!	#DIV/0!	#DIV/0!	#DIV/0!	#DIV/0!	#DIV/0!	#DIV/0!	#DIV/0!	#DIV/0!	#DIV/0!	#DIV/0!	#DIV/0!		0.606703	0.536472	0.480814	0.366685	0	0	0	0	0	0
[S]2	0.625	0.547915	0.441306	0.365898	0.251193	0	0	0	0	0	0	0	0	0	0	0	0						0.532214	0.432807	0.36469	0.247726	#DIV/0!	#DIV/0!	#DIV/0!	#DIV/0!	#DIV/0!	#DIV/0!	#DIV/0!	#DIV/0!	#DIV/0!	#DIV/0!	#DIV/0!	#DIV/0!		0.532214	0.432807	0.36469	0.247726	0	0	0	0	0	0
[S]3	0.25	0.373134	0.285201	0.233198	0.143266	0	0	0	0	0	0	0	0	0	0	0	0						0.38895	0.273979	0.21147	0.125542	#DIV/0!	#DIV/0!	#DIV/0!	#DIV/0!	#DIV/0!	#DIV/0!	#DIV/0!	#DIV/0!	#DIV/0!	#DIV/0!	#DIV/0!	#DIV/0!		0.38895	0.273979	0.21147	0.125542	0	0	0	0	0	0
[S]4	0.125	0.25	0.180897	0.141201	0.0834725	0	0	0	0	0	0	0	0	0	0	0	0						0.268493	0.170003	0.124378	0.0689021	#DIV/0!	#DIV/0!	#DIV/0!	#DIV/0!	#DIV/0!	#DIV/0!	#DIV/0!	#DIV/0!	#DIV/0!	#DIV/0!	#DIV/0!	#DIV/0!		0.268493	0.170003	0.124378	0.0689021	0	0	0	0	0	0
[S]5	0.0625	0.160256	0.108295	0.0847458	0.0501002	0	0	0	0	0	0	0	0	0	0	0	0						0.165798	0.0966467	0.0682011	0.0362199	#DIV/0!	#DIV/0!	#DIV/0!	#DIV/0!	#DIV/0!	#DIV/0!	#DIV/0!	#DIV/0!	#DIV/0!	#DIV/0!	#DIV/0!	#DIV/0!		0.165798	0.0966467	0.0682011	0.0362199	0	0	0	0	0	0
[S]6	0	0	0	0	0	0	0	0	0	0	0	0	0	0	0	0	0			Sum R2	0.00690438		#DIV/0!	#DIV/0!	#DIV/0!	#DIV/0!	#DIV/0!	#DIV/0!	#DIV/0!	#DIV/0!	#DIV/0!	#DIV/0!	#DIV/0!	#DIV/0!	#DIV/0!	#DIV/0!	#DIV/0!	#DIV/0!		0	0	0	0	0	0	0	0	0	0
[S]7	0	0	0	0	0	0	0	0	0	0	0	0	0	0	0	0	0			Sum residuals %	1.90734		#DIV/0!	#DIV/0!	#DIV/0!	#DIV/0!	#DIV/0!	#DIV/0!	#DIV/0!	#DIV/0!	#DIV/0!	#DIV/0!	#DIV/0!	#DIV/0!	#DIV/0!	#DIV/0!	#DIV/0!	#DIV/0!		0	0	0	0	0	0	0	0	0	0
[S]8	0	0	0	0	0	0	0	0	0	0	0	0	0	0	0	0	0						#DIV/0!	#DIV/0!	#DIV/0!	#DIV/0!	#DIV/0!	#DIV/0!	#DIV/0!	#DIV/0!	#DIV/0!	#DIV/0!	#DIV/0!	#DIV/0!	#DIV/0!	#DIV/0!	#DIV/0!	#DIV/0!		0	0	0	0	0	0	0	0	0	0
[S]9	0	0	0	0	0	0	0	0	0	0	0	0	0	0	0	0	0						#DIV/0!	#DIV/0!	#DIV/0!	#DIV/0!	#DIV/0!	#DIV/0!	#DIV/0!	#DIV/0!	#DIV/0!	#DIV/0!	#DIV/0!	#DIV/0!	#DIV/0!	#DIV/0!	#DIV/0!	#DIV/0!		0	0	0	0	0	0	0	0	0	0
[S]10	0	0	0	0	0	0	0	0	0	0	0	0	0	0	0	0	0						#DIV/0!	#DIV/0!	#DIV/0!	#DIV/0!	#DIV/0!	#DIV/0!	#DIV/0!	#DIV/0!	#DIV/0!	#DIV/0!	#DIV/0!	#DIV/0!	#DIV/0!	#DIV/0!	#DIV/0!	#DIV/0!		0	0	0	0	0	0	0	0	0	0
[S]11	0	0	0	0	0	0	0	0	0	0	0	0	0	0	0	0	0						#DIV/0!	#DIV/0!	#DIV/0!	#DIV/0!	#DIV/0!	#DIV/0!	#DIV/0!	#DIV/0!	#DIV/0!	#DIV/0!	#DIV/0!	#DIV/0!	#DIV/0!	#DIV/0!	#DIV/0!	#DIV/0!		0	0	0	0	0	0	0	0	0	0
[S]12	0	0	0	0	0	0	0	0	0	0	0	0	0	0	0	0	0						#DIV/0!	#DIV/0!	#DIV/0!	#DIV/0!	#DIV/0!	#DIV/0!	#DIV/0!	#DIV/0!	#DIV/0!	#DIV/0!	#DIV/0!	#DIV/0!	#DIV/0!	#DIV/0!	#DIV/0!	#DIV/0!		0	0	0	0	0	0	0	0	0	0
[S]13	0	0	0	0	0	0	0	0	0	0	0	0	0	0	0	0	0						#DIV/0!	#DIV/0!	#DIV/0!	#DIV/0!	#DIV/0!	#DIV/0!	#DIV/0!	#DIV/0!	#DIV/0!	#DIV/0!	#DIV/0!	#DIV/0!	#DIV/0!	#DIV/0!	#DIV/0!	#DIV/0!		0	0	0	0	0	0	0	0	0	0
[S]14	0	0	0	0	0	0	0	0	0	0	0	0	0	0	0	0	0						#DIV/0!	#DIV/0!	#DIV/0!	#DIV/0!	#DIV/0!	#DIV/0!	#DIV/0!	#DIV/0!	#DIV/0!	#DIV/0!	#DIV/0!	#DIV/0!	#DIV/0!	#DIV/0!	#DIV/0!	#DIV/0!		0	0	0	0	0	0	0	0	0	0
[S]15	0	0	0	0	0	0	0	0	0	0	0	0	0	0	0	0	0						#DIV/0!	#DIV/0!	#DIV/0!	#DIV/0!	#DIV/0!	#DIV/0!	#DIV/0!	#DIV/0!	#DIV/0!	#DIV/0!	#DIV/0!	#DIV/0!	#DIV/0!	#DIV/0!	#DIV/0!	#DIV/0!		0	0	0	0	0	0	0	0	0	0
	1	1	1	1	1	#DIV/0!	#DIV/0!	#DIV/0!	#DIV/0!	#DIV/0!	#DIV/0!	#DIV/0!	#DIV/0!	#DIV/0!	#DIV/0!	#DIV/0!	#DIV/0!																					1.25	1.25	0.606703	0.536472	0.480814	0.366685	#N/A	#N/A	#N/A	#N/A	#N/A	#N/A
	1	1	1	1	1	#DIV/0!	#DIV/0!	#DIV/0!	#DIV/0!	#DIV/0!	#DIV/0!	#DIV/0!	#DIV/0!	#DIV/0!	#DIV/0!	#DIV/0!	#DIV/0!					0.63857	0.63857	0.606703		-0.0318661	-0.0318661	2										0.625	0.625	0.532214	0.432807	0.36469	0.247726	#N/A	#N/A	#N/A	#N/A	#N/A	#N/A
	1	1	1	1	1	#DIV/0!	#DIV/0!	#DIV/0!	#DIV/0!	#DIV/0!	#DIV/0!	#DIV/0!	#DIV/0!	#DIV/0!	#DIV/0!	#DIV/0!	#DIV/0!					0.547915	0.547915	0.532214		-0.0157015	-0.0157015	2										0.25	0.25	0.38895	0.273979	0.21147	0.125542	#N/A	#N/A	#N/A	#N/A	#N/A	#N/A
	1	1	1	1	1	#DIV/0!	#DIV/0!	#DIV/0!	#DIV/0!	#DIV/0!	#DIV/0!	#DIV/0!	#DIV/0!	#DIV/0!	#DIV/0!	#DIV/0!	#DIV/0!					0.373134	0.373134	0.38895		0.0158158	0.0158158	2										0.125	0.125	0.268493	0.170003	0.124378	0.0689021	#N/A	#N/A	#N/A	#N/A	#N/A	#N/A
	1	1	1	1	1	#DIV/0!	#DIV/0!	#DIV/0!	#DIV/0!	#DIV/0!	#DIV/0!	#DIV/0!	#DIV/0!	#DIV/0!	#DIV/0!	#DIV/0!	#DIV/0!					0.25	0.25	0.268493		0.0184932	0.0184932	2										0.0625	0.0625	0.165798	0.0966467	0.0682011	0.0362199	#N/A	#N/A	#N/A	#N/A	#N/A	#N/A
	#DIV/0!	#DIV/0!	#DIV/0!	#DIV/0!	#DIV/0!	#DIV/0!	#DIV/0!	#DIV/0!	#DIV/0!	#DIV/0!	#DIV/0!	#DIV/0!	#DIV/0!	#DIV/0!	#DIV/0!	#DIV/0!	#DIV/0!					0.160256	0.160256	0.165798		0.00554206	0.00554206	2										#DIV/0!	#N/A	#N/A	#N/A	#N/A	#N/A	#N/A	#N/A	#N/A	#N/A	#N/A	#N/A
	#DIV/0!	#DIV/0!	#DIV/0!	#DIV/0!	#DIV/0!	#DIV/0!	#DIV/0!	#DIV/0!	#DIV/0!	#DIV/0!	#DIV/0!	#DIV/0!	#DIV/0!	#DIV/0!	#DIV/0!	#DIV/0!	#DIV/0!					#DIV/0!	#N/A	#N/A		#DIV/0!		2										#DIV/0!	#N/A	#N/A	#N/A	#N/A	#N/A	#N/A	#N/A	#N/A	#N/A	#N/A	#N/A
	#DIV/0!	#DIV/0!	#DIV/0!	#DIV/0!	#DIV/0!	#DIV/0!	#DIV/0!	#DIV/0!	#DIV/0!	#DIV/0!	#DIV/0!	#DIV/0!	#DIV/0!	#DIV/0!	#DIV/0!	#DIV/0!	#DIV/0!					#DIV/0!	#N/A	#N/A		#DIV/0!		2										#DIV/0!	#N/A	#N/A	#N/A	#N/A	#N/A	#N/A	#N/A	#N/A	#N/A	#N/A	#N/A
	#DIV/0!	#DIV/0!	#DIV/0!	#DIV/0!	#DIV/0!	#DIV/0!	#DIV/0!	#DIV/0!	#DIV/0!	#DIV/0!	#DIV/0!	#DIV/0!	#DIV/0!	#DIV/0!	#DIV/0!	#DIV/0!	#DIV/0!					#DIV/0!	#N/A	#N/A		#DIV/0!		2										#DIV/0!	#N/A	#N/A	#N/A	#N/A	#N/A	#N/A	#N/A	#N/A	#N/A	#N/A	#N/A
	#DIV/0!	#DIV/0!	#DIV/0!	#DIV/0!	#DIV/0!	#DIV/0!	#DIV/0!	#DIV/0!	#DIV/0!	#DIV/0!	#DIV/0!	#DIV/0!	#DIV/0!	#DIV/0!	#DIV/0!	#DIV/0!	#DIV/0!					#DIV/0!	#N/A	#N/A		#DIV/0!		2										#DIV/0!	#N/A	#N/A	#N/A	#N/A	#N/A	#N/A	#N/A	#N/A	#N/A	#N/A	#N/A
	#DIV/0!	#DIV/0!	#DIV/0!	#DIV/0!	#DIV/0!	#DIV/0!	#DIV/0!	#DIV/0!	#DIV/0!	#DIV/0!	#DIV/0!	#DIV/0!	#DIV/0!	#DIV/0!	#DIV/0!	#DIV/0!	#DIV/0!					#DIV/0!	#N/A	#N/A		#DIV/0!		2										#DIV/0!	#N/A	#N/A	#N/A	#N/A	#N/A	#N/A	#N/A	#N/A	#N/A	#N/A	#N/A
	#DIV/0!	#DIV/0!	#DIV/0!	#DIV/0!	#DIV/0!	#DIV/0!	#DIV/0!	#DIV/0!	#DIV/0!	#DIV/0!	#DIV/0!	#DIV/0!	#DIV/0!	#DIV/0!	#DIV/0!	#DIV/0!	#DIV/0!					#DIV/0!	#N/A	#N/A		#DIV/0!		2										#DIV/0!	#N/A	#N/A	#N/A	#N/A	#N/A	#N/A	#N/A	#N/A	#N/A	#N/A	#N/A
	#DIV/0!	#DIV/0!	#DIV/0!	#DIV/0!	#DIV/0!	#DIV/0!	#DIV/0!	#DIV/0!	#DIV/0!	#DIV/0!	#DIV/0!	#DIV/0!	#DIV/0!	#DIV/0!	#DIV/0!	#DIV/0!	#DIV/0!					#DIV/0!	#N/A	#N/A		#DIV/0!		2										#DIV/0!	#N/A	#N/A	#N/A	#N/A	#N/A	#N/A	#N/A	#N/A	#N/A	#N/A	#N/A
	#DIV/0!	#DIV/0!	#DIV/0!	#DIV/0!	#DIV/0!	#DIV/0!	#DIV/0!	#DIV/0!	#DIV/0!	#DIV/0!	#DIV/0!	#DIV/0!	#DIV/0!	#DIV/0!	#DIV/0!	#DIV/0!	#DIV/0!					#DIV/0!	#N/A	#N/A		#DIV/0!		2										#DIV/0!	#N/A	#N/A	#N/A	#N/A	#N/A	#N/A	#N/A	#N/A	#N/A	#N/A	#N/A
	#DIV/0!	#DIV/0!	#DIV/0!	#DIV/0!	#DIV/0!	#DIV/0!	#DIV/0!	#DIV/0!	#DIV/0!	#DIV/0!	#DIV/0!	#DIV/0!	#DIV/0!	#DIV/0!	#DIV/0!	#DIV/0!	#DIV/0!					#DIV/0!	#N/A	#N/A		#DIV/0!		2										#DIV/0!	#N/A	#N/A	#N/A	#N/A	#N/A	#N/A	#N/A	#N/A	#N/A	#N/A	#N/A
																						#DIV/0!	#N/A	#N/A		#DIV/0!		2
																						0.519994	0.519994	0.536472		0.0164786	0.0164786	2											0.8	1.64825	1.86403	2.07981	2.72714	#N/A	#N/A	#N/A	#N/A	#N/A	#N/A
																						0.441306	0.441306	0.432807		-0.00849936	-0.00849936	2											1.6	1.87894	2.3105	2.74205	4.03672	#N/A	#N/A	#N/A	#N/A	#N/A	#N/A
																						0.285201	0.285201	0.273979		-0.0112216	-0.0112216	2											4	2.57102	3.64991	4.7288	7.96546	#N/A	#N/A	#N/A	#N/A	#N/A	#N/A
																						0.180897	0.180897	0.170003		-0.0108946	-0.0108946	2											8	3.72449	5.88226	8.04003	14.5134	#N/A	#N/A	#N/A	#N/A	#N/A	#N/A
																						0.108295	0.108295	0.0966467		-0.0116487	-0.0116487	2											16	6.03142	10.347	14.6625	27.6091	#N/A	#N/A	#N/A	#N/A	#N/A	#N/A
																						#DIV/0!	#N/A	#N/A		#DIV/0!		2											#N/A	#N/A	#N/A	#N/A	#N/A	#N/A	#N/A	#N/A	#N/A	#N/A	#N/A
																						#DIV/0!	#N/A	#N/A		#DIV/0!		2											#N/A	#N/A	#N/A	#N/A	#N/A	#N/A	#N/A	#N/A	#N/A	#N/A	#N/A
																						#DIV/0!	#N/A	#N/A		#DIV/0!		2											#N/A	#N/A	#N/A	#N/A	#N/A	#N/A	#N/A	#N/A	#N/A	#N/A	#N/A
																						#DIV/0!	#N/A	#N/A		#DIV/0!		2											#N/A	#N/A	#N/A	#N/A	#N/A	#N/A	#N/A	#N/A	#N/A	#N/A	#N/A
																						#DIV/0!	#N/A	#N/A		#DIV/0!		2											#N/A	#N/A	#N/A	#N/A	#N/A	#N/A	#N/A	#N/A	#N/A	#N/A	#N/A
																						#DIV/0!	#N/A	#N/A		#DIV/0!		2											#N/A	#N/A	#N/A	#N/A	#N/A	#N/A	#N/A	#N/A	#N/A	#N/A	#N/A
																						#DIV/0!	#N/A	#N/A		#DIV/0!		2											#N/A	#N/A	#N/A	#N/A	#N/A	#N/A	#N/A	#N/A	#N/A	#N/A	#N/A
																						#DIV/0!	#N/A	#N/A		#DIV/0!		2											#N/A	#N/A	#N/A	#N/A	#N/A	#N/A	#N/A	#N/A	#N/A	#N/A	#N/A
																						#DIV/0!	#N/A	#N/A		#DIV/0!		2											#N/A	#N/A	#N/A	#N/A	#N/A	#N/A	#N/A	#N/A	#N/A	#N/A	#N/A
																						#DIV/0!	#N/A	#N/A		#DIV/0!		2											#N/A	#N/A	#N/A	#N/A	#N/A	#N/A	#N/A	#N/A	#N/A	#N/A	#N/A
																						0.450106	0.450106	0.480814		0.0307083	0.0307083	2
																						0.365898	0.365898	0.36469		-0.00120812	-0.00120812	2												0.63857	0.519994	0.450106	0.326797	#DIV/0!	#DIV/0!	#DIV/0!	#DIV/0!	#DIV/0!	#DIV/0!
																						0.233198	0.233198	0.21147		-0.0217278	-0.0217278	2												0.547915	0.441306	0.365898	0.251193	#DIV/0!	#DIV/0!	#DIV/0!	#DIV/0!	#DIV/0!	#DIV/0!
																						0.141201	0.141201	0.124378		-0.0168235	-0.0168235	2												0.373134	0.285201	0.233198	0.143266	#DIV/0!	#DIV/0!	#DIV/0!	#DIV/0!	#DIV/0!	#DIV/0!
																						0.0847458	0.0847458	0.0682011		-0.0165446	-0.0165446	2												0.25	0.180897	0.141201	0.0834725	#DIV/0!	#DIV/0!	#DIV/0!	#DIV/0!	#DIV/0!	#DIV/0!
																						#DIV/0!	#N/A	#N/A		#DIV/0!		2												0.160256	0.108295	0.0847458	0.0501002	#DIV/0!	#DIV/0!	#DIV/0!	#DIV/0!	#DIV/0!	#DIV/0!
																						#DIV/0!	#N/A	#N/A		#DIV/0!		2												#DIV/0!	#DIV/0!	#DIV/0!	#DIV/0!	#DIV/0!	#DIV/0!	#DIV/0!	#DIV/0!	#DIV/0!	#DIV/0!
																						#DIV/0!	#N/A	#N/A		#DIV/0!		2												#DIV/0!	#DIV/0!	#DIV/0!	#DIV/0!	#DIV/0!	#DIV/0!	#DIV/0!	#DIV/0!	#DIV/0!	#DIV/0!
																						#DIV/0!	#N/A	#N/A		#DIV/0!		2												#DIV/0!	#DIV/0!	#DIV/0!	#DIV/0!	#DIV/0!	#DIV/0!	#DIV/0!	#DIV/0!	#DIV/0!	#DIV/0!
																						#DIV/0!	#N/A	#N/A		#DIV/0!		2												#DIV/0!	#DIV/0!	#DIV/0!	#DIV/0!	#DIV/0!	#DIV/0!	#DIV/0!	#DIV/0!	#DIV/0!	#DIV/0!
																						#DIV/0!	#N/A	#N/A		#DIV/0!		2												#DIV/0!	#DIV/0!	#DIV/0!	#DIV/0!	#DIV/0!	#DIV/0!	#DIV/0!	#DIV/0!	#DIV/0!	#DIV/0!
																						#DIV/0!	#N/A	#N/A		#DIV/0!		2												#DIV/0!	#DIV/0!	#DIV/0!	#DIV/0!	#DIV/0!	#DIV/0!	#DIV/0!	#DIV/0!	#DIV/0!	#DIV/0!
																						#DIV/0!	#N/A	#N/A		#DIV/0!		2												#DIV/0!	#DIV/0!	#DIV/0!	#DIV/0!	#DIV/0!	#DIV/0!	#DIV/0!	#DIV/0!	#DIV/0!	#DIV/0!
																						#DIV/0!	#N/A	#N/A		#DIV/0!		2												#DIV/0!	#DIV/0!	#DIV/0!	#DIV/0!	#DIV/0!	#DIV/0!	#DIV/0!	#DIV/0!	#DIV/0!	#DIV/0!
																						#DIV/0!	#N/A	#N/A		#DIV/0!		2												#DIV/0!	#DIV/0!	#DIV/0!	#DIV/0!	#DIV/0!	#DIV/0!	#DIV/0!	#DIV/0!	#DIV/0!	#DIV/0!
																						0.326797	0.326797	0.366685		0.0398874	0.0398874	2												#DIV/0!	#DIV/0!	#DIV/0!	#DIV/0!	#DIV/0!	#DIV/0!	#DIV/0!	#DIV/0!	#DIV/0!	#DIV/0!
																						0.251193	0.251193	0.247726		-0.00346713	-0.00346713	2
																						0.143266	0.143266	0.125542		-0.0177244	-0.0177244	2												1/s	0	0.05	0.1	0.25	0	0	0	0	0
																						0.0834725	0.0834725	0.0689021		-0.0145704	-0.0145704	2											1	0.8	1.64825	1.86403	2.07981	2.72714	#N/A	#N/A	#N/A	#N/A	#N/A
																						0.0501002	0.0501002	0.0362199		-0.0138803	-0.0138803	2											2	1.6	1.87894	2.3105	2.74205	4.03672	#N/A	#N/A	#N/A	#N/A	#N/A
																						#DIV/0!	#N/A	#N/A		#DIV/0!		2											3	4	2.57102	3.64991	4.7288	7.96546	#N/A	#N/A	#N/A	#N/A	#N/A
																						#DIV/0!	#N/A	#N/A		#DIV/0!		2											4	8	3.72449	5.88226	8.04003	14.5134	#N/A	#N/A	#N/A	#N/A	#N/A
																						#DIV/0!	#N/A	#N/A		#DIV/0!		2											5	16	6.03142	10.347	14.6625	27.6091	#N/A	#N/A	#N/A	#N/A	#N/A
																						#DIV/0!	#N/A	#N/A		#DIV/0!		2											6	#N/A	#N/A	#N/A	#N/A	#N/A	#N/A	#N/A	#N/A	#N/A	#N/A
																						#DIV/0!	#N/A	#N/A		#DIV/0!		2											7	#N/A	#N/A	#N/A	#N/A	#N/A	#N/A	#N/A	#N/A	#N/A	#N/A
																						#DIV/0!	#N/A	#N/A		#DIV/0!		2											8	#N/A	#N/A	#N/A	#N/A	#N/A	#N/A	#N/A	#N/A	#N/A	#N/A
																						#DIV/0!	#N/A	#N/A		#DIV/0!		2											9	#N/A	#N/A	#N/A	#N/A	#N/A	#N/A	#N/A	#N/A	#N/A	#N/A
																						#DIV/0!	#N/A	#N/A		#DIV/0!		2											10	#N/A	#N/A	#N/A	#N/A	#N/A	#N/A	#N/A	#N/A	#N/A	#N/A
																						#DIV/0!	#N/A	#N/A		#DIV/0!		2											11	#N/A	#N/A	#N/A	#N/A	#N/A	#N/A	#N/A	#N/A	#N/A	#N/A
																						#DIV/0!	#N/A	#N/A		#DIV/0!		2											12	#N/A	#N/A	#N/A	#N/A	#N/A	#N/A	#N/A	#N/A	#N/A	#N/A
																						#DIV/0!	#N/A	#N/A		#DIV/0!		2											13	#N/A	#N/A	#N/A	#N/A	#N/A	#N/A	#N/A	#N/A	#N/A	#N/A
																						#DIV/0!	#N/A	#N/A		#DIV/0!		2											14	#N/A	#N/A	#N/A	#N/A	#N/A	#N/A	#N/A	#N/A	#N/A	#N/A
																						#DIV/0!	#N/A	#N/A		#DIV/0!		2											15	#N/A	#N/A	#N/A	#N/A	#N/A	#N/A	#N/A	#N/A	#N/A	#N/A
																						#DIV/0!	#N/A	#N/A		#DIV/0!		2
																						#DIV/0!	#N/A	#N/A		#DIV/0!		2
																						#DIV/0!	#N/A	#N/A		#DIV/0!		2
																						#DIV/0!	#N/A	#N/A		#DIV/0!		2
																						#DIV/0!	#N/A	#N/A		#DIV/0!		2
																						#DIV/0!	#N/A	#N/A		#DIV/0!		2
																						#DIV/0!	#N/A	#N/A		#DIV/0!		2
																						#DIV/0!	#N/A	#N/A		#DIV/0!		2
																						#DIV/0!	#N/A	#N/A		#DIV/0!		2
																						#DIV/0!	#N/A	#N/A		#DIV/0!		2
																						#DIV/0!	#N/A	#N/A		#DIV/0!		2
																						#DIV/0!	#N/A	#N/A		#DIV/0!		2
																						#DIV/0!	#N/A	#N/A		#DIV/0!		2
																						#DIV/0!	#N/A	#N/A		#DIV/0!		2
																						#DIV/0!	#N/A	#N/A		#DIV/0!		2
																						#DIV/0!	#N/A	#N/A		#DIV/0!		2
																						#DIV/0!	#N/A	#N/A		#DIV/0!		2
																						#DIV/0!	#N/A	#N/A		#DIV/0!		2
																						#DIV/0!	#N/A	#N/A		#DIV/0!		2
																						#DIV/0!	#N/A	#N/A		#DIV/0!		2
																						#DIV/0!	#N/A	#N/A		#DIV/0!		2
																						#DIV/0!	#N/A	#N/A		#DIV/0!		2
																						#DIV/0!	#N/A	#N/A		#DIV/0!		2
																						#DIV/0!	#N/A	#N/A		#DIV/0!		2
																						#DIV/0!	#N/A	#N/A		#DIV/0!		2
																						#DIV/0!	#N/A	#N/A		#DIV/0!		2
																						#DIV/0!	#N/A	#N/A		#DIV/0!		2
																						#DIV/0!	#N/A	#N/A		#DIV/0!		2
																						#DIV/0!	#N/A	#N/A		#DIV/0!		2
																						#DIV/0!	#N/A	#N/A		#DIV/0!		2
																						#DIV/0!	#N/A	#N/A		#DIV/0!		2
																						#DIV/0!	#N/A	#N/A		#DIV/0!		2
																						#DIV/0!	#N/A	#N/A		#DIV/0!		2
																						#DIV/0!	#N/A	#N/A		#DIV/0!		2
																						#DIV/0!	#N/A	#N/A		#DIV/0!		2
																						#DIV/0!	#N/A	#N/A		#DIV/0!		2
																						#DIV/0!	#N/A	#N/A		#DIV/0!		2
																						#DIV/0!	#N/A	#N/A		#DIV/0!		2
																						#DIV/0!	#N/A	#N/A		#DIV/0!		2
																						#DIV/0!	#N/A	#N/A		#DIV/0!		2
																						#DIV/0!	#N/A	#N/A		#DIV/0!		2
																						#DIV/0!	#N/A	#N/A		#DIV/0!		2
																						#DIV/0!	#N/A	#N/A		#DIV/0!		2
																						#DIV/0!	#N/A	#N/A		#DIV/0!		2
																						#DIV/0!	#N/A	#N/A		#DIV/0!		2
																						#DIV/0!	#N/A	#N/A		#DIV/0!		2
																						#DIV/0!	#N/A	#N/A		#DIV/0!		2
																						#DIV/0!	#N/A	#N/A		#DIV/0!		2
																						#DIV/0!	#N/A	#N/A		#DIV/0!		2
																						#DIV/0!	#N/A	#N/A		#DIV/0!		2
																						#DIV/0!	#N/A	#N/A		#DIV/0!		2
																						#DIV/0!	#N/A	#N/A		#DIV/0!		2
																						#DIV/0!	#N/A	#N/A		#DIV/0!		2
																						#DIV/0!	#N/A	#N/A		#DIV/0!		2
																						#DIV/0!	#N/A	#N/A		#DIV/0!		2
																						#DIV/0!	#N/A	#N/A		#DIV/0!		2
																						#DIV/0!	#N/A	#N/A		#DIV/0!		2
																						#DIV/0!	#N/A	#N/A		#DIV/0!		2
																						#DIV/0!	#N/A	#N/A		#DIV/0!		2
																						#DIV/0!	#N/A	#N/A		#DIV/0!		2
																						#DIV/0!	#N/A	#N/A		#DIV/0!		2
																						#DIV/0!	#N/A	#N/A		#DIV/0!		2
																						#DIV/0!	#N/A	#N/A		#DIV/0!		2
																						#DIV/0!	#N/A	#N/A		#DIV/0!		2
																						#DIV/0!	#N/A	#N/A		#DIV/0!		2
																						#DIV/0!	#N/A	#N/A		#DIV/0!		2
																						#DIV/0!	#N/A	#N/A		#DIV/0!		2
																						#DIV/0!	#N/A	#N/A		#DIV/0!		2
																						#DIV/0!	#N/A	#N/A		#DIV/0!		2
																						#DIV/0!	#N/A	#N/A		#DIV/0!		2
																						#DIV/0!	#N/A	#N/A		#DIV/0!		2
																						#DIV/0!	#N/A	#N/A		#DIV/0!		2
																						#DIV/0!	#N/A	#N/A		#DIV/0!		2
																						#DIV/0!	#N/A	#N/A		#DIV/0!		2
																						#DIV/0!	#N/A	#N/A		#DIV/0!		2
																						#DIV/0!	#N/A	#N/A		#DIV/0!		2
																						#DIV/0!	#N/A	#N/A		#DIV/0!		2
																						#DIV/0!	#N/A	#N/A		#DIV/0!		2
																						#DIV/0!	#N/A	#N/A		#DIV/0!		2
																						#DIV/0!	#N/A	#N/A		#DIV/0!		2
																						#DIV/0!	#N/A	#N/A		#DIV/0!		2
																						#DIV/0!	#N/A	#N/A		#DIV/0!		2
																						#DIV/0!	#N/A	#N/A		#DIV/0!		2
																						#DIV/0!	#N/A	#N/A		#DIV/0!		2
																						#DIV/0!	#N/A	#N/A		#DIV/0!		2
																						#DIV/0!	#N/A	#N/A		#DIV/0!		2
																						#DIV/0!	#N/A	#N/A		#DIV/0!		2
																						#DIV/0!	#N/A	#N/A		#DIV/0!		2
																						#DIV/0!	#N/A	#N/A		#DIV/0!		2
																						#DIV/0!	#N/A	#N/A		#DIV/0!		2
																						#DIV/0!	#N/A	#N/A		#DIV/0!		2
																						#DIV/0!	#N/A	#N/A		#DIV/0!		2
																						#DIV/0!	#N/A	#N/A		#DIV/0!		2
																						#DIV/0!	#N/A	#N/A		#DIV/0!		2
																						#DIV/0!	#N/A	#N/A		#DIV/0!		2
																						#DIV/0!	#N/A	#N/A		#DIV/0!		2
																						#DIV/0!	#N/A	#N/A		#DIV/0!		2
																						#DIV/0!	#N/A	#N/A		#DIV/0!		2
																						#DIV/0!	#N/A	#N/A		#DIV/0!		2
																						#DIV/0!	#N/A	#N/A		#DIV/0!		2
																						#DIV/0!	#N/A	#N/A		#DIV/0!		2
																						#DIV/0!	#N/A	#N/A		#DIV/0!		2
																						#DIV/0!	#N/A	#N/A		#DIV/0!		2
																						#DIV/0!	#N/A	#N/A		#DIV/0!		2
																						#DIV/0!	#N/A	#N/A		#DIV/0!		2
																						#DIV/0!	#N/A	#N/A		#DIV/0!		2
																						#DIV/0!	#N/A	#N/A		#DIV/0!		2
																						#DIV/0!	#N/A	#N/A		#DIV/0!		2
																						#DIV/0!	#N/A	#N/A		#DIV/0!		2
																						#DIV/0!	#N/A	#N/A		#DIV/0!		2
																						#DIV/0!	#N/A	#N/A		#DIV/0!		2
																						#DIV/0!	#N/A	#N/A		#DIV/0!		2
																						#DIV/0!	#N/A	#N/A		#DIV/0!		2
																						#DIV/0!	#N/A	#N/A		#DIV/0!		2
																						#DIV/0!	#N/A	#N/A		#DIV/0!		2
																						#DIV/0!	#N/A	#N/A		#DIV/0!		2
																						#DIV/0!	#N/A	#N/A		#DIV/0!		2
																						#DIV/0!	#N/A	#N/A		#DIV/0!		2
																						#DIV/0!	#N/A	#N/A		#DIV/0!		2
																						#DIV/0!	#N/A	#N/A		#DIV/0!		2
																						#DIV/0!	#N/A	#N/A		#DIV/0!		2
																						#DIV/0!	#N/A	#N/A		#DIV/0!		2
																						#DIV/0!	#N/A	#N/A		#DIV/0!		2
																						#DIV/0!	#N/A	#N/A		#DIV/0!		2
																						#DIV/0!	#N/A	#N/A		#DIV/0!		2
																						#DIV/0!	#N/A	#N/A		#DIV/0!		2
																						#DIV/0!	#N/A	#N/A		#DIV/0!		2
																						#DIV/0!	#N/A	#N/A		#DIV/0!		2
																						#DIV/0!	#N/A	#N/A		#DIV/0!		2
																						#DIV/0!	#N/A	#N/A		#DIV/0!		2
																						#DIV/0!	#N/A	#N/A		#DIV/0!		2
																						#DIV/0!	#N/A	#N/A		#DIV/0!		2
																						#DIV/0!	#N/A	#N/A		#DIV/0!		2
																						#DIV/0!	#N/A	#N/A		#DIV/0!		2
																						#DIV/0!	#N/A	#N/A		#DIV/0!		2
																						#DIV/0!	#N/A	#N/A		#DIV/0!		2
																						#DIV/0!	#N/A	#N/A		#DIV/0!		2
																						#DIV/0!	#N/A	#N/A		#DIV/0!		2
																						#DIV/0!	#N/A	#N/A		#DIV/0!		2
																						#DIV/0!	#N/A	#N/A		#DIV/0!		2
																						#DIV/0!	#N/A	#N/A		#DIV/0!		2
																						#DIV/0!	#N/A	#N/A		#DIV/0!		2
																						#DIV/0!	#N/A	#N/A		#DIV/0!		2
																						#DIV/0!	#N/A	#N/A		#DIV/0!		2
																						#DIV/0!	#N/A	#N/A		#DIV/0!		2
																						#DIV/0!	#N/A	#N/A		#DIV/0!		2
																						#DIV/0!	#N/A	#N/A		#DIV/0!		2
																						#DIV/0!	#N/A	#N/A		#DIV/0!		2
																						#DIV/0!	#N/A	#N/A		#DIV/0!		2
																						#DIV/0!	#N/A	#N/A		#DIV/0!		2
																						#DIV/0!	#N/A	#N/A		#DIV/0!		2
																						#DIV/0!	#N/A	#N/A		#DIV/0!		2
																						#DIV/0!	#N/A	#N/A		#DIV/0!		2
																						#DIV/0!	#N/A	#N/A		#DIV/0!		2
																						#DIV/0!	#N/A	#N/A		#DIV/0!		2
																						#DIV/0!	#N/A	#N/A		#DIV/0!		2
																						#DIV/0!	#N/A	#N/A		#DIV/0!		2
																						#DIV/0!	#N/A	#N/A		#DIV/0!		2
																						#DIV/0!	#N/A	#N/A		#DIV/0!		2
																						#DIV/0!	#N/A	#N/A		#DIV/0!		2
																						#DIV/0!	#N/A	#N/A		#DIV/0!		2
																						#DIV/0!	#N/A	#N/A		#DIV/0!		2
																						#DIV/0!	#N/A	#N/A		#DIV/0!		2
																						#DIV/0!	#N/A	#N/A		#DIV/0!		2
																						#DIV/0!	#N/A	#N/A		#DIV/0!		2
																						#DIV/0!	#N/A	#N/A		#DIV/0!		2
																						#DIV/0!	#N/A	#N/A		#DIV/0!		2
																						#DIV/0!	#N/A	#N/A		#DIV/0!		2
																						#DIV/0!	#N/A	#N/A		#DIV/0!		2
																						#DIV/0!	#N/A	#N/A		#DIV/0!		2
																						#DIV/0!	#N/A	#N/A		#DIV/0!		2
																						#DIV/0!	#N/A	#N/A		#DIV/0!		2
																						#DIV/0!	#N/A	#N/A		#DIV/0!		2
																						#DIV/0!	#N/A	#N/A		#DIV/0!		2
																						#DIV/0!	#N/A	#N/A		#DIV/0!		2
																						#DIV/0!	#N/A	#N/A		#DIV/0!		2
																						#DIV/0!	#N/A	#N/A		#DIV/0!		2
[truncated: 54 more columns]

## Sheet: Uncompetitive
																							Calculated values
		No Inhibitor	[I]1	[I]2	[I]3	[I]4	[I]5	[I]6	[I]7	[I]8	[I]9	[I]10	[I]11	[I]12	[I]13	[I]14	[I]15						No Inhibitor	[I]1	[I]2	[I]3	[I]4	[I]5	[I]6	[I]7	[I]8	[I]9	[I]10	[I]11	[I]12	[I]13	[I]14	[I]15
		0	0.05	0.1	0.25	0	0	0	0	0	0	0	0	0	0	0	0		Km	Vmax	Ki		0	0.05	0.1	0.25	0	0	0	0	0	0	0	0	0	0	0	0
[S]1	1.25	0.63857	0.519994	0.450106	0.326797	0	0	0	0	0	0	0	0	0	0	0	0		0.419652	0.88849	0.13595		0.665176	0.521566	0.428956	0.279872	#DIV/0!	#DIV/0!	#DIV/0!	#DIV/0!	#DIV/0!	#DIV/0!	#DIV/0!	#DIV/0!	#DIV/0!	#DIV/0!	#DIV/0!	#DIV/0!		0.665176	0.521566	0.428956	0.279872	0	0	0	0	0	0
[S]2	0.625	0.547915	0.441306	0.365898	0.251193	0	0	0	0	0	0	0	0	0	0	0	0						0.53157	0.4357	0.369127	0.253106	#DIV/0!	#DIV/0!	#DIV/0!	#DIV/0!	#DIV/0!	#DIV/0!	#DIV/0!	#DIV/0!	#DIV/0!	#DIV/0!	#DIV/0!	#DIV/0!		0.53157	0.4357	0.369127	0.253106	0	0	0	0	0	0
[S]3	0.25	0.373134	0.285201	0.233198	0.143266	0	0	0	0	0	0	0	0	0	0	0	0						0.331698	0.291653	0.260236	0.196677	#DIV/0!	#DIV/0!	#DIV/0!	#DIV/0!	#DIV/0!	#DIV/0!	#DIV/0!	#DIV/0!	#DIV/0!	#DIV/0!	#DIV/0!	#DIV/0!		0.331698	0.291653	0.260236	0.196677	0	0	0	0	0	0
[S]4	0.125	0.25	0.180897	0.141201	0.0834725	0	0	0	0	0	0	0	0	0	0	0	0						0.203912	0.18804	0.174461	0.143394	#DIV/0!	#DIV/0!	#DIV/0!	#DIV/0!	#DIV/0!	#DIV/0!	#DIV/0!	#DIV/0!	#DIV/0!	#DIV/0!	#DIV/0!	#DIV/0!		0.203912	0.18804	0.174461	0.143394	0	0	0	0	0	0
[S]5	0.0625	0.160256	0.108295	0.0847458	0.0501002	0	0	0	0	0	0	0	0	0	0	0	0						0.115172	0.109931	0.105147	0.0930031	#DIV/0!	#DIV/0!	#DIV/0!	#DIV/0!	#DIV/0!	#DIV/0!	#DIV/0!	#DIV/0!	#DIV/0!	#DIV/0!	#DIV/0!	#DIV/0!		0.115172	0.109931	0.105147	0.0930031	0	0	0	0	0	0
[S]6	0	0	0	0	0	0	0	0	0	0	0	0	0	0	0	0	0			Sum R2	0.0201787		#DIV/0!	#DIV/0!	#DIV/0!	#DIV/0!	#DIV/0!	#DIV/0!	#DIV/0!	#DIV/0!	#DIV/0!	#DIV/0!	#DIV/0!	#DIV/0!	#DIV/0!	#DIV/0!	#DIV/0!	#DIV/0!		0	0	0	0	0	0	0	0	0	0
[S]7	0	0	0	0	0	0	0	0	0	0	0	0	0	0	0	0	0			Sum residuals %	2.7766		#DIV/0!	#DIV/0!	#DIV/0!	#DIV/0!	#DIV/0!	#DIV/0!	#DIV/0!	#DIV/0!	#DIV/0!	#DIV/0!	#DIV/0!	#DIV/0!	#DIV/0!	#DIV/0!	#DIV/0!	#DIV/0!		0	0	0	0	0	0	0	0	0	0
[S]8	0	0	0	0	0	0	0	0	0	0	0	0	0	0	0	0	0						#DIV/0!	#DIV/0!	#DIV/0!	#DIV/0!	#DIV/0!	#DIV/0!	#DIV/0!	#DIV/0!	#DIV/0!	#DIV/0!	#DIV/0!	#DIV/0!	#DIV/0!	#DIV/0!	#DIV/0!	#DIV/0!		0	0	0	0	0	0	0	0	0	0
[S]9	0	0	0	0	0	0	0	0	0	0	0	0	0	0	0	0	0						#DIV/0!	#DIV/0!	#DIV/0!	#DIV/0!	#DIV/0!	#DIV/0!	#DIV/0!	#DIV/0!	#DIV/0!	#DIV/0!	#DIV/0!	#DIV/0!	#DIV/0!	#DIV/0!	#DIV/0!	#DIV/0!		0	0	0	0	0	0	0	0	0	0
[S]10	0	0	0	0	0	0	0	0	0	0	0	0	0	0	0	0	0						#DIV/0!	#DIV/0!	#DIV/0!	#DIV/0!	#DIV/0!	#DIV/0!	#DIV/0!	#DIV/0!	#DIV/0!	#DIV/0!	#DIV/0!	#DIV/0!	#DIV/0!	#DIV/0!	#DIV/0!	#DIV/0!		0	0	0	0	0	0	0	0	0	0
[S]11	0	0	0	0	0	0	0	0	0	0	0	0	0	0	0	0	0						#DIV/0!	#DIV/0!	#DIV/0!	#DIV/0!	#DIV/0!	#DIV/0!	#DIV/0!	#DIV/0!	#DIV/0!	#DIV/0!	#DIV/0!	#DIV/0!	#DIV/0!	#DIV/0!	#DIV/0!	#DIV/0!		0	0	0	0	0	0	0	0	0	0
[S]12	0	0	0	0	0	0	0	0	0	0	0	0	0	0	0	0	0						#DIV/0!	#DIV/0!	#DIV/0!	#DIV/0!	#DIV/0!	#DIV/0!	#DIV/0!	#DIV/0!	#DIV/0!	#DIV/0!	#DIV/0!	#DIV/0!	#DIV/0!	#DIV/0!	#DIV/0!	#DIV/0!		0	0	0	0	0	0	0	0	0	0
[S]13	0	0	0	0	0	0	0	0	0	0	0	0	0	0	0	0	0						#DIV/0!	#DIV/0!	#DIV/0!	#DIV/0!	#DIV/0!	#DIV/0!	#DIV/0!	#DIV/0!	#DIV/0!	#DIV/0!	#DIV/0!	#DIV/0!	#DIV/0!	#DIV/0!	#DIV/0!	#DIV/0!		0	0	0	0	0	0	0	0	0	0
[S]14	0	0	0	0	0	0	0	0	0	0	0	0	0	0	0	0	0						#DIV/0!	#DIV/0!	#DIV/0!	#DIV/0!	#DIV/0!	#DIV/0!	#DIV/0!	#DIV/0!	#DIV/0!	#DIV/0!	#DIV/0!	#DIV/0!	#DIV/0!	#DIV/0!	#DIV/0!	#DIV/0!		0	0	0	0	0	0	0	0	0	0
[S]15	0	0	0	0	0	0	0	0	0	0	0	0	0	0	0	0	0						#DIV/0!	#DIV/0!	#DIV/0!	#DIV/0!	#DIV/0!	#DIV/0!	#DIV/0!	#DIV/0!	#DIV/0!	#DIV/0!	#DIV/0!	#DIV/0!	#DIV/0!	#DIV/0!	#DIV/0!	#DIV/0!		0	0	0	0	0	0	0	0	0	0
	1	1	1	1	1	#DIV/0!	#DIV/0!	#DIV/0!	#DIV/0!	#DIV/0!	#DIV/0!	#DIV/0!	#DIV/0!	#DIV/0!	#DIV/0!	#DIV/0!	#DIV/0!																					1.25	1.25	0.665176	0.521566	0.428956	0.279872	#N/A	#N/A	#N/A	#N/A	#N/A	#N/A
	1	1	1	1	1	#DIV/0!	#DIV/0!	#DIV/0!	#DIV/0!	#DIV/0!	#DIV/0!	#DIV/0!	#DIV/0!	#DIV/0!	#DIV/0!	#DIV/0!	#DIV/0!					0.63857	0.63857	0.665176		0.0266061	0.0266061	3										0.625	0.625	0.53157	0.4357	0.369127	0.253106	#N/A	#N/A	#N/A	#N/A	#N/A	#N/A
	1	1	1	1	1	#DIV/0!	#DIV/0!	#DIV/0!	#DIV/0!	#DIV/0!	#DIV/0!	#DIV/0!	#DIV/0!	#DIV/0!	#DIV/0!	#DIV/0!	#DIV/0!					0.547915	0.547915	0.53157		-0.0163449	-0.0163449	3										0.25	0.25	0.331698	0.291653	0.260236	0.196677	#N/A	#N/A	#N/A	#N/A	#N/A	#N/A
	1	1	1	1	1	#DIV/0!	#DIV/0!	#DIV/0!	#DIV/0!	#DIV/0!	#DIV/0!	#DIV/0!	#DIV/0!	#DIV/0!	#DIV/0!	#DIV/0!	#DIV/0!					0.373134	0.373134	0.331698		-0.0414361	-0.0414361	3										0.125	0.125	0.203912	0.18804	0.174461	0.143394	#N/A	#N/A	#N/A	#N/A	#N/A	#N/A
	1	1	1	1	1	#DIV/0!	#DIV/0!	#DIV/0!	#DIV/0!	#DIV/0!	#DIV/0!	#DIV/0!	#DIV/0!	#DIV/0!	#DIV/0!	#DIV/0!	#DIV/0!					0.25	0.25	0.203912		-0.0460878	-0.0460878	3										0.0625	0.0625	0.115172	0.109931	0.105147	0.0930031	#N/A	#N/A	#N/A	#N/A	#N/A	#N/A
	#DIV/0!	#DIV/0!	#DIV/0!	#DIV/0!	#DIV/0!	#DIV/0!	#DIV/0!	#DIV/0!	#DIV/0!	#DIV/0!	#DIV/0!	#DIV/0!	#DIV/0!	#DIV/0!	#DIV/0!	#DIV/0!	#DIV/0!					0.160256	0.160256	0.115172		-0.045084	-0.045084	3										#DIV/0!	#N/A	#N/A	#N/A	#N/A	#N/A	#N/A	#N/A	#N/A	#N/A	#N/A	#N/A
	#DIV/0!	#DIV/0!	#DIV/0!	#DIV/0!	#DIV/0!	#DIV/0!	#DIV/0!	#DIV/0!	#DIV/0!	#DIV/0!	#DIV/0!	#DIV/0!	#DIV/0!	#DIV/0!	#DIV/0!	#DIV/0!	#DIV/0!					#DIV/0!	#N/A	#N/A		#DIV/0!		3										#DIV/0!	#N/A	#N/A	#N/A	#N/A	#N/A	#N/A	#N/A	#N/A	#N/A	#N/A	#N/A
	#DIV/0!	#DIV/0!	#DIV/0!	#DIV/0!	#DIV/0!	#DIV/0!	#DIV/0!	#DIV/0!	#DIV/0!	#DIV/0!	#DIV/0!	#DIV/0!	#DIV/0!	#DIV/0!	#DIV/0!	#DIV/0!	#DIV/0!					#DIV/0!	#N/A	#N/A		#DIV/0!		3										#DIV/0!	#N/A	#N/A	#N/A	#N/A	#N/A	#N/A	#N/A	#N/A	#N/A	#N/A	#N/A
	#DIV/0!	#DIV/0!	#DIV/0!	#DIV/0!	#DIV/0!	#DIV/0!	#DIV/0!	#DIV/0!	#DIV/0!	#DIV/0!	#DIV/0!	#DIV/0!	#DIV/0!	#DIV/0!	#DIV/0!	#DIV/0!	#DIV/0!					#DIV/0!	#N/A	#N/A		#DIV/0!		3										#DIV/0!	#N/A	#N/A	#N/A	#N/A	#N/A	#N/A	#N/A	#N/A	#N/A	#N/A	#N/A
	#DIV/0!	#DIV/0!	#DIV/0!	#DIV/0!	#DIV/0!	#DIV/0!	#DIV/0!	#DIV/0!	#DIV/0!	#DIV/0!	#DIV/0!	#DIV/0!	#DIV/0!	#DIV/0!	#DIV/0!	#DIV/0!	#DIV/0!					#DIV/0!	#N/A	#N/A		#DIV/0!		3										#DIV/0!	#N/A	#N/A	#N/A	#N/A	#N/A	#N/A	#N/A	#N/A	#N/A	#N/A	#N/A
	#DIV/0!	#DIV/0!	#DIV/0!	#DIV/0!	#DIV/0!	#DIV/0!	#DIV/0!	#DIV/0!	#DIV/0!	#DIV/0!	#DIV/0!	#DIV/0!	#DIV/0!	#DIV/0!	#DIV/0!	#DIV/0!	#DIV/0!					#DIV/0!	#N/A	#N/A		#DIV/0!		3										#DIV/0!	#N/A	#N/A	#N/A	#N/A	#N/A	#N/A	#N/A	#N/A	#N/A	#N/A	#N/A
	#DIV/0!	#DIV/0!	#DIV/0!	#DIV/0!	#DIV/0!	#DIV/0!	#DIV/0!	#DIV/0!	#DIV/0!	#DIV/0!	#DIV/0!	#DIV/0!	#DIV/0!	#DIV/0!	#DIV/0!	#DIV/0!	#DIV/0!					#DIV/0!	#N/A	#N/A		#DIV/0!		3										#DIV/0!	#N/A	#N/A	#N/A	#N/A	#N/A	#N/A	#N/A	#N/A	#N/A	#N/A	#N/A
	#DIV/0!	#DIV/0!	#DIV/0!	#DIV/0!	#DIV/0!	#DIV/0!	#DIV/0!	#DIV/0!	#DIV/0!	#DIV/0!	#DIV/0!	#DIV/0!	#DIV/0!	#DIV/0!	#DIV/0!	#DIV/0!	#DIV/0!					#DIV/0!	#N/A	#N/A		#DIV/0!		3										#DIV/0!	#N/A	#N/A	#N/A	#N/A	#N/A	#N/A	#N/A	#N/A	#N/A	#N/A	#N/A
	#DIV/0!	#DIV/0!	#DIV/0!	#DIV/0!	#DIV/0!	#DIV/0!	#DIV/0!	#DIV/0!	#DIV/0!	#DIV/0!	#DIV/0!	#DIV/0!	#DIV/0!	#DIV/0!	#DIV/0!	#DIV/0!	#DIV/0!					#DIV/0!	#N/A	#N/A		#DIV/0!		3										#DIV/0!	#N/A	#N/A	#N/A	#N/A	#N/A	#N/A	#N/A	#N/A	#N/A	#N/A	#N/A
	#DIV/0!	#DIV/0!	#DIV/0!	#DIV/0!	#DIV/0!	#DIV/0!	#DIV/0!	#DIV/0!	#DIV/0!	#DIV/0!	#DIV/0!	#DIV/0!	#DIV/0!	#DIV/0!	#DIV/0!	#DIV/0!	#DIV/0!					#DIV/0!	#N/A	#N/A		#DIV/0!		3										#DIV/0!	#N/A	#N/A	#N/A	#N/A	#N/A	#N/A	#N/A	#N/A	#N/A	#N/A	#N/A
																						#DIV/0!	#N/A	#N/A		#DIV/0!		3
																						0.519994	0.519994	0.521566		0.00157257	0.00157257	3											0.8	1.50336	1.9173	2.33124	3.57306	#N/A	#N/A	#N/A	#N/A	#N/A	#N/A
																						0.441306	0.441306	0.4357		-0.00560647	-0.00560647	3											1.6	1.88122	2.29516	2.7091	3.95092	#N/A	#N/A	#N/A	#N/A	#N/A	#N/A
																						0.285201	0.285201	0.291653		0.00645242	0.00645242	3											4	3.01479	3.42873	3.84267	5.08449	#N/A	#N/A	#N/A	#N/A	#N/A	#N/A
																						0.180897	0.180897	0.18804		0.00714298	0.00714298	3											8	4.90407	5.31801	5.73195	6.97377	#N/A	#N/A	#N/A	#N/A	#N/A	#N/A
																						0.108295	0.108295	0.109931		0.00163603	0.00163603	3											16	8.68264	9.09658	9.51052	10.7523	#N/A	#N/A	#N/A	#N/A	#N/A	#N/A
																						#DIV/0!	#N/A	#N/A		#DIV/0!		3											#N/A	#N/A	#N/A	#N/A	#N/A	#N/A	#N/A	#N/A	#N/A	#N/A	#N/A
																						#DIV/0!	#N/A	#N/A		#DIV/0!		3											#N/A	#N/A	#N/A	#N/A	#N/A	#N/A	#N/A	#N/A	#N/A	#N/A	#N/A
																						#DIV/0!	#N/A	#N/A		#DIV/0!		3											#N/A	#N/A	#N/A	#N/A	#N/A	#N/A	#N/A	#N/A	#N/A	#N/A	#N/A
																						#DIV/0!	#N/A	#N/A		#DIV/0!		3											#N/A	#N/A	#N/A	#N/A	#N/A	#N/A	#N/A	#N/A	#N/A	#N/A	#N/A
																						#DIV/0!	#N/A	#N/A		#DIV/0!		3											#N/A	#N/A	#N/A	#N/A	#N/A	#N/A	#N/A	#N/A	#N/A	#N/A	#N/A
																						#DIV/0!	#N/A	#N/A		#DIV/0!		3											#N/A	#N/A	#N/A	#N/A	#N/A	#N/A	#N/A	#N/A	#N/A	#N/A	#N/A
																						#DIV/0!	#N/A	#N/A		#DIV/0!		3											#N/A	#N/A	#N/A	#N/A	#N/A	#N/A	#N/A	#N/A	#N/A	#N/A	#N/A
																						#DIV/0!	#N/A	#N/A		#DIV/0!		3											#N/A	#N/A	#N/A	#N/A	#N/A	#N/A	#N/A	#N/A	#N/A	#N/A	#N/A
																						#DIV/0!	#N/A	#N/A		#DIV/0!		3											#N/A	#N/A	#N/A	#N/A	#N/A	#N/A	#N/A	#N/A	#N/A	#N/A	#N/A
																						#DIV/0!	#N/A	#N/A		#DIV/0!		3											#N/A	#N/A	#N/A	#N/A	#N/A	#N/A	#N/A	#N/A	#N/A	#N/A	#N/A
																						0.450106	0.450106	0.428956		-0.0211497	-0.0211497	3
																						0.365898	0.365898	0.369127		0.0032283	0.0032283	3												0.63857	0.519994	0.450106	0.326797	#DIV/0!	#DIV/0!	#DIV/0!	#DIV/0!	#DIV/0!	#DIV/0!
																						0.233198	0.233198	0.260236		0.0270378	0.0270378	3												0.547915	0.441306	0.365898	0.251193	#DIV/0!	#DIV/0!	#DIV/0!	#DIV/0!	#DIV/0!	#DIV/0!
																						0.141201	0.141201	0.174461		0.0332596	0.0332596	3												0.373134	0.285201	0.233198	0.143266	#DIV/0!	#DIV/0!	#DIV/0!	#DIV/0!	#DIV/0!	#DIV/0!
																						0.0847458	0.0847458	0.105147		0.020401	0.020401	3												0.25	0.180897	0.141201	0.0834725	#DIV/0!	#DIV/0!	#DIV/0!	#DIV/0!	#DIV/0!	#DIV/0!
																						#DIV/0!	#N/A	#N/A		#DIV/0!		3												0.160256	0.108295	0.0847458	0.0501002	#DIV/0!	#DIV/0!	#DIV/0!	#DIV/0!	#DIV/0!	#DIV/0!
																						#DIV/0!	#N/A	#N/A		#DIV/0!		3												#DIV/0!	#DIV/0!	#DIV/0!	#DIV/0!	#DIV/0!	#DIV/0!	#DIV/0!	#DIV/0!	#DIV/0!	#DIV/0!
																						#DIV/0!	#N/A	#N/A		#DIV/0!		3												#DIV/0!	#DIV/0!	#DIV/0!	#DIV/0!	#DIV/0!	#DIV/0!	#DIV/0!	#DIV/0!	#DIV/0!	#DIV/0!
																						#DIV/0!	#N/A	#N/A		#DIV/0!		3												#DIV/0!	#DIV/0!	#DIV/0!	#DIV/0!	#DIV/0!	#DIV/0!	#DIV/0!	#DIV/0!	#DIV/0!	#DIV/0!
																						#DIV/0!	#N/A	#N/A		#DIV/0!		3												#DIV/0!	#DIV/0!	#DIV/0!	#DIV/0!	#DIV/0!	#DIV/0!	#DIV/0!	#DIV/0!	#DIV/0!	#DIV/0!
																						#DIV/0!	#N/A	#N/A		#DIV/0!		3												#DIV/0!	#DIV/0!	#DIV/0!	#DIV/0!	#DIV/0!	#DIV/0!	#DIV/0!	#DIV/0!	#DIV/0!	#DIV/0!
																						#DIV/0!	#N/A	#N/A		#DIV/0!		3												#DIV/0!	#DIV/0!	#DIV/0!	#DIV/0!	#DIV/0!	#DIV/0!	#DIV/0!	#DIV/0!	#DIV/0!	#DIV/0!
																						#DIV/0!	#N/A	#N/A		#DIV/0!		3												#DIV/0!	#DIV/0!	#DIV/0!	#DIV/0!	#DIV/0!	#DIV/0!	#DIV/0!	#DIV/0!	#DIV/0!	#DIV/0!
																						#DIV/0!	#N/A	#N/A		#DIV/0!		3												#DIV/0!	#DIV/0!	#DIV/0!	#DIV/0!	#DIV/0!	#DIV/0!	#DIV/0!	#DIV/0!	#DIV/0!	#DIV/0!
																						#DIV/0!	#N/A	#N/A		#DIV/0!		3												#DIV/0!	#DIV/0!	#DIV/0!	#DIV/0!	#DIV/0!	#DIV/0!	#DIV/0!	#DIV/0!	#DIV/0!	#DIV/0!
																						0.326797	0.326797	0.279872		-0.0469252	-0.0469252	3												#DIV/0!	#DIV/0!	#DIV/0!	#DIV/0!	#DIV/0!	#DIV/0!	#DIV/0!	#DIV/0!	#DIV/0!	#DIV/0!
																						0.251193	0.251193	0.253106		0.00191267	0.00191267	3
																						0.143266	0.143266	0.196677		0.0534102	0.0534102	3												1/s	0	0.05	0.1	0.25	0	0	0	0	0
																						0.0834725	0.0834725	0.143394		0.059922	0.059922	3											1	0.8	1.50336	1.9173	2.33124	3.57306	#N/A	#N/A	#N/A	#N/A	#N/A
																						0.0501002	0.0501002	0.0930031		0.0429029	0.0429029	3											2	1.6	1.88122	2.29516	2.7091	3.95092	#N/A	#N/A	#N/A	#N/A	#N/A
																						#DIV/0!	#N/A	#N/A		#DIV/0!		3											3	4	3.01479	3.42873	3.84267	5.08449	#N/A	#N/A	#N/A	#N/A	#N/A
																						#DIV/0!	#N/A	#N/A		#DIV/0!		3											4	8	4.90407	5.31801	5.73195	6.97377	#N/A	#N/A	#N/A	#N/A	#N/A
																						#DIV/0!	#N/A	#N/A		#DIV/0!		3											5	16	8.68264	9.09658	9.51052	10.7523	#N/A	#N/A	#N/A	#N/A	#N/A
																						#DIV/0!	#N/A	#N/A		#DIV/0!		3											6	#N/A	#N/A	#N/A	#N/A	#N/A	#N/A	#N/A	#N/A	#N/A	#N/A
																						#DIV/0!	#N/A	#N/A		#DIV/0!		3											7	#N/A	#N/A	#N/A	#N/A	#N/A	#N/A	#N/A	#N/A	#N/A	#N/A
																						#DIV/0!	#N/A	#N/A		#DIV/0!		3											8	#N/A	#N/A	#N/A	#N/A	#N/A	#N/A	#N/A	#N/A	#N/A	#N/A
																						#DIV/0!	#N/A	#N/A		#DIV/0!		3											9	#N/A	#N/A	#N/A	#N/A	#N/A	#N/A	#N/A	#N/A	#N/A	#N/A
																						#DIV/0!	#N/A	#N/A		#DIV/0!		3											10	#N/A	#N/A	#N/A	#N/A	#N/A	#N/A	#N/A	#N/A	#N/A	#N/A
																						#DIV/0!	#N/A	#N/A		#DIV/0!		3											11	#N/A	#N/A	#N/A	#N/A	#N/A	#N/A	#N/A	#N/A	#N/A	#N/A
																						#DIV/0!	#N/A	#N/A		#DIV/0!		3											12	#N/A	#N/A	#N/A	#N/A	#N/A	#N/A	#N/A	#N/A	#N/A	#N/A
																						#DIV/0!	#N/A	#N/A		#DIV/0!		3											13	#N/A	#N/A	#N/A	#N/A	#N/A	#N/A	#N/A	#N/A	#N/A	#N/A
																						#DIV/0!	#N/A	#N/A		#DIV/0!		3											14	#N/A	#N/A	#N/A	#N/A	#N/A	#N/A	#N/A	#N/A	#N/A	#N/A
																						#DIV/0!	#N/A	#N/A		#DIV/0!		3											15	#N/A	#N/A	#N/A	#N/A	#N/A	#N/A	#N/A	#N/A	#N/A	#N/A
																						#DIV/0!	#N/A	#N/A		#DIV/0!		3
																						#DIV/0!	#N/A	#N/A		#DIV/0!		3
																						#DIV/0!	#N/A	#N/A		#DIV/0!		3
																						#DIV/0!	#N/A	#N/A		#DIV/0!		3
																						#DIV/0!	#N/A	#N/A		#DIV/0!		3
																						#DIV/0!	#N/A	#N/A		#DIV/0!		3
																						#DIV/0!	#N/A	#N/A		#DIV/0!		3
																						#DIV/0!	#N/A	#N/A		#DIV/0!		3
																						#DIV/0!	#N/A	#N/A		#DIV/0!		3
																						#DIV/0!	#N/A	#N/A		#DIV/0!		3
																						#DIV/0!	#N/A	#N/A		#DIV/0!		3
																						#DIV/0!	#N/A	#N/A		#DIV/0!		3
																						#DIV/0!	#N/A	#N/A		#DIV/0!		3
																						#DIV/0!	#N/A	#N/A		#DIV/0!		3
																						#DIV/0!	#N/A	#N/A		#DIV/0!		3
																						#DIV/0!	#N/A	#N/A		#DIV/0!		3
																						#DIV/0!	#N/A	#N/A		#DIV/0!		3
																						#DIV/0!	#N/A	#N/A		#DIV/0!		3
																						#DIV/0!	#N/A	#N/A		#DIV/0!		3
																						#DIV/0!	#N/A	#N/A		#DIV/0!		3
																						#DIV/0!	#N/A	#N/A		#DIV/0!		3
																						#DIV/0!	#N/A	#N/A		#DIV/0!		3
																						#DIV/0!	#N/A	#N/A		#DIV/0!		3
																						#DIV/0!	#N/A	#N/A		#DIV/0!		3
																						#DIV/0!	#N/A	#N/A		#DIV/0!		3
																						#DIV/0!	#N/A	#N/A		#DIV/0!		3
																						#DIV/0!	#N/A	#N/A		#DIV/0!		3
																						#DIV/0!	#N/A	#N/A		#DIV/0!		3
																						#DIV/0!	#N/A	#N/A		#DIV/0!		3
																						#DIV/0!	#N/A	#N/A		#DIV/0!		3
																						#DIV/0!	#N/A	#N/A		#DIV/0!		3
																						#DIV/0!	#N/A	#N/A		#DIV/0!		3
																						#DIV/0!	#N/A	#N/A		#DIV/0!		3
																						#DIV/0!	#N/A	#N/A		#DIV/0!		3
																						#DIV/0!	#N/A	#N/A		#DIV/0!		3
																						#DIV/0!	#N/A	#N/A		#DIV/0!		3
																						#DIV/0!	#N/A	#N/A		#DIV/0!		3
																						#DIV/0!	#N/A	#N/A		#DIV/0!		3
																						#DIV/0!	#N/A	#N/A		#DIV/0!		3
																						#DIV/0!	#N/A	#N/A		#DIV/0!		3
																						#DIV/0!	#N/A	#N/A		#DIV/0!		3
																						#DIV/0!	#N/A	#N/A		#DIV/0!		3
																						#DIV/0!	#N/A	#N/A		#DIV/0!		3
																						#DIV/0!	#N/A	#N/A		#DIV/0!		3
																						#DIV/0!	#N/A	#N/A		#DIV/0!		3
																						#DIV/0!	#N/A	#N/A		#DIV/0!		3
																						#DIV/0!	#N/A	#N/A		#DIV/0!		3
																						#DIV/0!	#N/A	#N/A		#DIV/0!		3
																						#DIV/0!	#N/A	#N/A		#DIV/0!		3
																						#DIV/0!	#N/A	#N/A		#DIV/0!		3
																						#DIV/0!	#N/A	#N/A		#DIV/0!		3
																						#DIV/0!	#N/A	#N/A		#DIV/0!		3
																						#DIV/0!	#N/A	#N/A		#DIV/0!		3
																						#DIV/0!	#N/A	#N/A		#DIV/0!		3
																						#DIV/0!	#N/A	#N/A		#DIV/0!		3
																						#DIV/0!	#N/A	#N/A		#DIV/0!		3
																						#DIV/0!	#N/A	#N/A		#DIV/0!		3
																						#DIV/0!	#N/A	#N/A		#DIV/0!		3
																						#DIV/0!	#N/A	#N/A		#DIV/0!		3
																						#DIV/0!	#N/A	#N/A		#DIV/0!		3
																						#DIV/0!	#N/A	#N/A		#DIV/0!		3
																						#DIV/0!	#N/A	#N/A		#DIV/0!		3
																						#DIV/0!	#N/A	#N/A		#DIV/0!		3
																						#DIV/0!	#N/A	#N/A		#DIV/0!		3
																						#DIV/0!	#N/A	#N/A		#DIV/0!		3
																						#DIV/0!	#N/A	#N/A		#DIV/0!		3
																						#DIV/0!	#N/A	#N/A		#DIV/0!		3
																						#DIV/0!	#N/A	#N/A		#DIV/0!		3
																						#DIV/0!	#N/A	#N/A		#DIV/0!		3
																						#DIV/0!	#N/A	#N/A		#DIV/0!		3
																						#DIV/0!	#N/A	#N/A		#DIV/0!		3
																						#DIV/0!	#N/A	#N/A		#DIV/0!		3
																						#DIV/0!	#N/A	#N/A		#DIV/0!		3
																						#DIV/0!	#N/A	#N/A		#DIV/0!		3
																						#DIV/0!	#N/A	#N/A		#DIV/0!		3
																						#DIV/0!	#N/A	#N/A		#DIV/0!		3
																						#DIV/0!	#N/A	#N/A		#DIV/0!		3
																						#DIV/0!	#N/A	#N/A		#DIV/0!		3
																						#DIV/0!	#N/A	#N/A		#DIV/0!		3
																						#DIV/0!	#N/A	#N/A		#DIV/0!		3
																						#DIV/0!	#N/A	#N/A		#DIV/0!		3
																						#DIV/0!	#N/A	#N/A		#DIV/0!		3
																						#DIV/0!	#N/A	#N/A		#DIV/0!		3
																						#DIV/0!	#N/A	#N/A		#DIV/0!		3
																						#DIV/0!	#N/A	#N/A		#DIV/0!		3
																						#DIV/0!	#N/A	#N/A		#DIV/0!		3
																						#DIV/0!	#N/A	#N/A		#DIV/0!		3
																						#DIV/0!	#N/A	#N/A		#DIV/0!		3
																						#DIV/0!	#N/A	#N/A		#DIV/0!		3
																						#DIV/0!	#N/A	#N/A		#DIV/0!		3
																						#DIV/0!	#N/A	#N/A		#DIV/0!		3
																						#DIV/0!	#N/A	#N/A		#DIV/0!		3
																						#DIV/0!	#N/A	#N/A		#DIV/0!		3
																						#DIV/0!	#N/A	#N/A		#DIV/0!		3
																						#DIV/0!	#N/A	#N/A		#DIV/0!		3
																						#DIV/0!	#N/A	#N/A		#DIV/0!		3
																						#DIV/0!	#N/A	#N/A		#DIV/0!		3
																						#DIV/0!	#N/A	#N/A		#DIV/0!		3
																						#DIV/0!	#N/A	#N/A		#DIV/0!		3
																						#DIV/0!	#N/A	#N/A		#DIV/0!		3
																						#DIV/0!	#N/A	#N/A		#DIV/0!		3
																						#DIV/0!	#N/A	#N/A		#DIV/0!		3
																						#DIV/0!	#N/A	#N/A		#DIV/0!		3
																						#DIV/0!	#N/A	#N/A		#DIV/0!		3
																						#DIV/0!	#N/A	#N/A		#DIV/0!		3
																						#DIV/0!	#N/A	#N/A		#DIV/0!		3
																						#DIV/0!	#N/A	#N/A		#DIV/0!		3
																						#DIV/0!	#N/A	#N/A		#DIV/0!		3
																						#DIV/0!	#N/A	#N/A		#DIV/0!		3
																						#DIV/0!	#N/A	#N/A		#DIV/0!		3
																						#DIV/0!	#N/A	#N/A		#DIV/0!		3
																						#DIV/0!	#N/A	#N/A		#DIV/0!		3
																						#DIV/0!	#N/A	#N/A		#DIV/0!		3
																						#DIV/0!	#N/A	#N/A		#DIV/0!		3
																						#DIV/0!	#N/A	#N/A		#DIV/0!		3
																						#DIV/0!	#N/A	#N/A		#DIV/0!		3
																						#DIV/0!	#N/A	#N/A		#DIV/0!		3
																						#DIV/0!	#N/A	#N/A		#DIV/0!		3
																						#DIV/0!	#N/A	#N/A		#DIV/0!		3
																						#DIV/0!	#N/A	#N/A		#DIV/0!		3
																						#DIV/0!	#N/A	#N/A		#DIV/0!		3
																						#DIV/0!	#N/A	#N/A		#DIV/0!		3
																						#DIV/0!	#N/A	#N/A		#DIV/0!		3
																						#DIV/0!	#N/A	#N/A		#DIV/0!		3
																						#DIV/0!	#N/A	#N/A		#DIV/0!		3
																						#DIV/0!	#N/A	#N/A		#DIV/0!		3
																						#DIV/0!	#N/A	#N/A		#DIV/0!		3
																						#DIV/0!	#N/A	#N/A		#DIV/0!		3
																						#DIV/0!	#N/A	#N/A		#DIV/0!		3
																						#DIV/0!	#N/A	#N/A		#DIV/0!		3
																						#DIV/0!	#N/A	#N/A		#DIV/0!		3
																						#DIV/0!	#N/A	#N/A		#DIV/0!		3
																						#DIV/0!	#N/A	#N/A		#DIV/0!		3
																						#DIV/0!	#N/A	#N/A		#DIV/0!		3
																						#DIV/0!	#N/A	#N/A		#DIV/0!		3
																						#DIV/0!	#N/A	#N/A		#DIV/0!		3
																						#DIV/0!	#N/A	#N/A		#DIV/0!		3
																						#DIV/0!	#N/A	#N/A		#DIV/0!		3
																						#DIV/0!	#N/A	#N/A		#DIV/0!		3
																						#DIV/0!	#N/A	#N/A		#DIV/0!		3
																						#DIV/0!	#N/A	#N/A		#DIV/0!		3
																						#DIV/0!	#N/A	#N/A		#DIV/0!		3
																						#DIV/0!	#N/A	#N/A		#DIV/0!		3
																						#DIV/0!	#N/A	#N/A		#DIV/0!		3
																						#DIV/0!	#N/A	#N/A		#DIV/0!		3
																						#DIV/0!	#N/A	#N/A		#DIV/0!		3
																						#DIV/0!	#N/A	#N/A		#DIV/0!		3
																						#DIV/0!	#N/A	#N/A		#DIV/0!		3
																						#DIV/0!	#N/A	#N/A		#DIV/0!		3
																						#DIV/0!	#N/A	#N/A		#DIV/0!		3
																						#DIV/0!	#N/A	#N/A		#DIV/0!		3
																						#DIV/0!	#N/A	#N/A		#DIV/0!		3
																						#DIV/0!	#N/A	#N/A		#DIV/0!		3
																						#DIV/0!	#N/A	#N/A		#DIV/0!		3
																						#DIV/0!	#N/A	#N/A		#DIV/0!		3
																						#DIV/0!	#N/A	#N/A		#DIV/0!		3
																						#DIV/0!	#N/A	#N/A		#DIV/0!		3
																						#DIV/0!	#N/A	#N/A		#DIV/0!		3
																						#DIV/0!	#N/A	#N/A		#DIV/0!		3
																						#DIV/0!	#N/A	#N/A		#DIV/0!		3
																						#DIV/0!	#N/A	#N/A		#DIV/0!		3
																						#DIV/0!	#N/A	#N/A		#DIV/0!		3
																						#DIV/0!	#N/A	#N/A		#DIV/0!		3
																						#DIV/0!	#N/A	#N/A		#DIV/0!		3
																						#DIV/0!	#N/A	#N/A		#DIV/0!		3
																						#DIV/0!	#N/A	#N/A		#DIV/0!		3
																						#DIV/0!	#N/A	#N/A		#DIV/0!		3
																						#DIV/0!	#N/A	#N/A		#DIV/0!		3
																						#DIV/0!	#N/A	#N/A		#DIV/0!		3
																						#DIV/0!	#N/A	#N/A		#DIV/0!		3
																						#DIV/0!	#N/A	#N/A		#DIV/0!		3
																						#DIV/0!	#N/A	#N/A		#DIV/0!		3
																						#DIV/0!	#N/A	#N/A		#DIV/0!		3
																						#DIV/0!	#N/A	#N/A		#DIV/0!		3
																						#DIV/0!	#N/A	#N/A		#DIV/0!		3
																						#DIV/0!	#N/A	#N/A		#DIV/0!		3
																						#DIV/0!	#N/A	#N/A		#DIV/0!		3
[truncated: 54 more columns]

## Sheet: Mixed Non-competitive
																							Calculated values
		No Inhibitor	[I]1	[I]2	[I]3	[I]4	[I]5	[I]6	[I]7	[I]8	[I]9	[I]10	[I]11	[I]12	[I]13	[I]14	[I]15						No Inhibitor	[I]1	[I]2	[I]3	[I]4	[I]5	[I]6	[I]7	[I]8	[I]9	[I]10	[I]11	[I]12	[I]13	[I]14	[I]15
		0	0.05	0.1	0.25	0	0	0	0	0	0	0	0	0	0	0	0	Km	Vmax	Ki	aKi		0	0.05	0.1	0.25	0	0	0	0	0	0	0	0	0	0	0	0
[S]1	1.25	0.63857	0.519994	0.450106	0.326797	0	0	0	0	0	0	0	0	0	0	0	0	0.25139	0.761235	0.098979	0.373371		0.633775	0.529879	0.455249	0.320028	#DIV/0!	#DIV/0!	#DIV/0!	#DIV/0!	#DIV/0!	#DIV/0!	#DIV/0!	#DIV/0!	#DIV/0!	#DIV/0!	#DIV/0!	#DIV/0!		0.633775	0.529879	0.455249	0.320028	0	0	0	0	0	0
[S]2	0.625	0.547915	0.441306	0.365898	0.251193	0	0	0	0	0	0	0	0	0	0	0	0						0.542877	0.437661	0.366608	0.246536	#DIV/0!	#DIV/0!	#DIV/0!	#DIV/0!	#DIV/0!	#DIV/0!	#DIV/0!	#DIV/0!	#DIV/0!	#DIV/0!	#DIV/0!	#DIV/0!		0.542877	0.437661	0.366608	0.246536	0	0	0	0	0	0
[S]3	0.25	0.373134	0.285201	0.233198	0.143266	0	0	0	0	0	0	0	0	0	0	0	0						0.379563	0.287536	0.231426	0.145971	#DIV/0!	#DIV/0!	#DIV/0!	#DIV/0!	#DIV/0!	#DIV/0!	#DIV/0!	#DIV/0!	#DIV/0!	#DIV/0!	#DIV/0!	#DIV/0!		0.379563	0.287536	0.231426	0.145971	0	0	0	0	0	0
[S]4	0.125	0.25	0.180897	0.141201	0.0834725	0	0	0	0	0	0	0	0	0	0	0	0						0.252808	0.182947	0.143337	0.0868955	#DIV/0!	#DIV/0!	#DIV/0!	#DIV/0!	#DIV/0!	#DIV/0!	#DIV/0!	#DIV/0!	#DIV/0!	#DIV/0!	#DIV/0!	#DIV/0!		0.252808	0.182947	0.143337	0.0868955	0	0	0	0	0	0
[S]5	0.0625	0.160256	0.108295	0.0847458	0.0501002	0	0	0	0	0	0	0	0	0	0	0	0						0.151573	0.105903	0.0813825	0.048024	#DIV/0!	#DIV/0!	#DIV/0!	#DIV/0!	#DIV/0!	#DIV/0!	#DIV/0!	#DIV/0!	#DIV/0!	#DIV/0!	#DIV/0!	#DIV/0!		0.151573	0.105903	0.0813825	0.048024	0	0	0	0	0	0
[S]6	0	0	0	0	0	0	0	0	0	0	0	0	0	0	0	0	0			Sum R2	0.000436199		#DIV/0!	#DIV/0!	#DIV/0!	#DIV/0!	#DIV/0!	#DIV/0!	#DIV/0!	#DIV/0!	#DIV/0!	#DIV/0!	#DIV/0!	#DIV/0!	#DIV/0!	#DIV/0!	#DIV/0!	#DIV/0!		0	0	0	0	0	0	0	0	0	0
[S]7	0	0	0	0	0	0	0	0	0	0	0	0	0	0	0	0	0			Sum residuals %	0.389392		#DIV/0!	#DIV/0!	#DIV/0!	#DIV/0!	#DIV/0!	#DIV/0!	#DIV/0!	#DIV/0!	#DIV/0!	#DIV/0!	#DIV/0!	#DIV/0!	#DIV/0!	#DIV/0!	#DIV/0!	#DIV/0!		0	0	0	0	0	0	0	0	0	0
[S]8	0	0	0	0	0	0	0	0	0	0	0	0	0	0	0	0	0						#DIV/0!	#DIV/0!	#DIV/0!	#DIV/0!	#DIV/0!	#DIV/0!	#DIV/0!	#DIV/0!	#DIV/0!	#DIV/0!	#DIV/0!	#DIV/0!	#DIV/0!	#DIV/0!	#DIV/0!	#DIV/0!		0	0	0	0	0	0	0	0	0	0
[S]9	0	0	0	0	0	0	0	0	0	0	0	0	0	0	0	0	0						#DIV/0!	#DIV/0!	#DIV/0!	#DIV/0!	#DIV/0!	#DIV/0!	#DIV/0!	#DIV/0!	#DIV/0!	#DIV/0!	#DIV/0!	#DIV/0!	#DIV/0!	#DIV/0!	#DIV/0!	#DIV/0!		0	0	0	0	0	0	0	0	0	0
[S]10	0	0	0	0	0	0	0	0	0	0	0	0	0	0	0	0	0						#DIV/0!	#DIV/0!	#DIV/0!	#DIV/0!	#DIV/0!	#DIV/0!	#DIV/0!	#DIV/0!	#DIV/0!	#DIV/0!	#DIV/0!	#DIV/0!	#DIV/0!	#DIV/0!	#DIV/0!	#DIV/0!		0	0	0	0	0	0	0	0	0	0
[S]11	0	0	0	0	0	0	0	0	0	0	0	0	0	0	0	0	0						#DIV/0!	#DIV/0!	#DIV/0!	#DIV/0!	#DIV/0!	#DIV/0!	#DIV/0!	#DIV/0!	#DIV/0!	#DIV/0!	#DIV/0!	#DIV/0!	#DIV/0!	#DIV/0!	#DIV/0!	#DIV/0!		0	0	0	0	0	0	0	0	0	0
[S]12	0	0	0	0	0	0	0	0	0	0	0	0	0	0	0	0	0						#DIV/0!	#DIV/0!	#DIV/0!	#DIV/0!	#DIV/0!	#DIV/0!	#DIV/0!	#DIV/0!	#DIV/0!	#DIV/0!	#DIV/0!	#DIV/0!	#DIV/0!	#DIV/0!	#DIV/0!	#DIV/0!		0	0	0	0	0	0	0	0	0	0
[S]13	0	0	0	0	0	0	0	0	0	0	0	0	0	0	0	0	0						#DIV/0!	#DIV/0!	#DIV/0!	#DIV/0!	#DIV/0!	#DIV/0!	#DIV/0!	#DIV/0!	#DIV/0!	#DIV/0!	#DIV/0!	#DIV/0!	#DIV/0!	#DIV/0!	#DIV/0!	#DIV/0!		0	0	0	0	0	0	0	0	0	0
[S]14	0	0	0	0	0	0	0	0	0	0	0	0	0	0	0	0	0						#DIV/0!	#DIV/0!	#DIV/0!	#DIV/0!	#DIV/0!	#DIV/0!	#DIV/0!	#DIV/0!	#DIV/0!	#DIV/0!	#DIV/0!	#DIV/0!	#DIV/0!	#DIV/0!	#DIV/0!	#DIV/0!		0	0	0	0	0	0	0	0	0	0
[S]15	0	0	0	0	0	0	0	0	0	0	0	0	0	0	0	0	0						#DIV/0!	#DIV/0!	#DIV/0!	#DIV/0!	#DIV/0!	#DIV/0!	#DIV/0!	#DIV/0!	#DIV/0!	#DIV/0!	#DIV/0!	#DIV/0!	#DIV/0!	#DIV/0!	#DIV/0!	#DIV/0!		0	0	0	0	0	0	0	0	0	0
	1	1	1	1	1	#DIV/0!	#DIV/0!	#DIV/0!	#DIV/0!	#DIV/0!	#DIV/0!	#DIV/0!	#DIV/0!	#DIV/0!	#DIV/0!	#DIV/0!	#DIV/0!																					1.25	1.25	0.633775	0.529879	0.455249	0.320028	#N/A	#N/A	#N/A	#N/A	#N/A	#N/A
	1	1	1	1	1	#DIV/0!	#DIV/0!	#DIV/0!	#DIV/0!	#DIV/0!	#DIV/0!	#DIV/0!	#DIV/0!	#DIV/0!	#DIV/0!	#DIV/0!	#DIV/0!					0.63857	0.63857	0.633775		-0.0047942	-0.0047942	4										0.625	0.625	0.542877	0.437661	0.366608	0.246536	#N/A	#N/A	#N/A	#N/A	#N/A	#N/A
	1	1	1	1	1	#DIV/0!	#DIV/0!	#DIV/0!	#DIV/0!	#DIV/0!	#DIV/0!	#DIV/0!	#DIV/0!	#DIV/0!	#DIV/0!	#DIV/0!	#DIV/0!					0.547915	0.547915	0.542877		-0.00503807	-0.00503807	4										0.25	0.25	0.379563	0.287536	0.231426	0.145971	#N/A	#N/A	#N/A	#N/A	#N/A	#N/A
	1	1	1	1	1	#DIV/0!	#DIV/0!	#DIV/0!	#DIV/0!	#DIV/0!	#DIV/0!	#DIV/0!	#DIV/0!	#DIV/0!	#DIV/0!	#DIV/0!	#DIV/0!					0.373134	0.373134	0.379563		0.00642821	0.00642821	4										0.125	0.125	0.252808	0.182947	0.143337	0.0868955	#N/A	#N/A	#N/A	#N/A	#N/A	#N/A
	1	1	1	1	1	#DIV/0!	#DIV/0!	#DIV/0!	#DIV/0!	#DIV/0!	#DIV/0!	#DIV/0!	#DIV/0!	#DIV/0!	#DIV/0!	#DIV/0!	#DIV/0!					0.25	0.25	0.252808		0.0028081	0.0028081	4										0.0625	0.0625	0.151573	0.105903	0.0813825	0.048024	#N/A	#N/A	#N/A	#N/A	#N/A	#N/A
	#DIV/0!	#DIV/0!	#DIV/0!	#DIV/0!	#DIV/0!	#DIV/0!	#DIV/0!	#DIV/0!	#DIV/0!	#DIV/0!	#DIV/0!	#DIV/0!	#DIV/0!	#DIV/0!	#DIV/0!	#DIV/0!	#DIV/0!					0.160256	0.160256	0.151573		-0.00868348	-0.00868348	4										#DIV/0!	#N/A	#N/A	#N/A	#N/A	#N/A	#N/A	#N/A	#N/A	#N/A	#N/A	#N/A
	#DIV/0!	#DIV/0!	#DIV/0!	#DIV/0!	#DIV/0!	#DIV/0!	#DIV/0!	#DIV/0!	#DIV/0!	#DIV/0!	#DIV/0!	#DIV/0!	#DIV/0!	#DIV/0!	#DIV/0!	#DIV/0!	#DIV/0!					#DIV/0!	#N/A	#N/A		#DIV/0!		4										#DIV/0!	#N/A	#N/A	#N/A	#N/A	#N/A	#N/A	#N/A	#N/A	#N/A	#N/A	#N/A
	#DIV/0!	#DIV/0!	#DIV/0!	#DIV/0!	#DIV/0!	#DIV/0!	#DIV/0!	#DIV/0!	#DIV/0!	#DIV/0!	#DIV/0!	#DIV/0!	#DIV/0!	#DIV/0!	#DIV/0!	#DIV/0!	#DIV/0!					#DIV/0!	#N/A	#N/A		#DIV/0!		4										#DIV/0!	#N/A	#N/A	#N/A	#N/A	#N/A	#N/A	#N/A	#N/A	#N/A	#N/A	#N/A
	#DIV/0!	#DIV/0!	#DIV/0!	#DIV/0!	#DIV/0!	#DIV/0!	#DIV/0!	#DIV/0!	#DIV/0!	#DIV/0!	#DIV/0!	#DIV/0!	#DIV/0!	#DIV/0!	#DIV/0!	#DIV/0!	#DIV/0!					#DIV/0!	#N/A	#N/A		#DIV/0!		4										#DIV/0!	#N/A	#N/A	#N/A	#N/A	#N/A	#N/A	#N/A	#N/A	#N/A	#N/A	#N/A
	#DIV/0!	#DIV/0!	#DIV/0!	#DIV/0!	#DIV/0!	#DIV/0!	#DIV/0!	#DIV/0!	#DIV/0!	#DIV/0!	#DIV/0!	#DIV/0!	#DIV/0!	#DIV/0!	#DIV/0!	#DIV/0!	#DIV/0!					#DIV/0!	#N/A	#N/A		#DIV/0!		4										#DIV/0!	#N/A	#N/A	#N/A	#N/A	#N/A	#N/A	#N/A	#N/A	#N/A	#N/A	#N/A
	#DIV/0!	#DIV/0!	#DIV/0!	#DIV/0!	#DIV/0!	#DIV/0!	#DIV/0!	#DIV/0!	#DIV/0!	#DIV/0!	#DIV/0!	#DIV/0!	#DIV/0!	#DIV/0!	#DIV/0!	#DIV/0!	#DIV/0!					#DIV/0!	#N/A	#N/A		#DIV/0!		4										#DIV/0!	#N/A	#N/A	#N/A	#N/A	#N/A	#N/A	#N/A	#N/A	#N/A	#N/A	#N/A
	#DIV/0!	#DIV/0!	#DIV/0!	#DIV/0!	#DIV/0!	#DIV/0!	#DIV/0!	#DIV/0!	#DIV/0!	#DIV/0!	#DIV/0!	#DIV/0!	#DIV/0!	#DIV/0!	#DIV/0!	#DIV/0!	#DIV/0!					#DIV/0!	#N/A	#N/A		#DIV/0!		4										#DIV/0!	#N/A	#N/A	#N/A	#N/A	#N/A	#N/A	#N/A	#N/A	#N/A	#N/A	#N/A
	#DIV/0!	#DIV/0!	#DIV/0!	#DIV/0!	#DIV/0!	#DIV/0!	#DIV/0!	#DIV/0!	#DIV/0!	#DIV/0!	#DIV/0!	#DIV/0!	#DIV/0!	#DIV/0!	#DIV/0!	#DIV/0!	#DIV/0!					#DIV/0!	#N/A	#N/A		#DIV/0!		4										#DIV/0!	#N/A	#N/A	#N/A	#N/A	#N/A	#N/A	#N/A	#N/A	#N/A	#N/A	#N/A
	#DIV/0!	#DIV/0!	#DIV/0!	#DIV/0!	#DIV/0!	#DIV/0!	#DIV/0!	#DIV/0!	#DIV/0!	#DIV/0!	#DIV/0!	#DIV/0!	#DIV/0!	#DIV/0!	#DIV/0!	#DIV/0!	#DIV/0!					#DIV/0!	#N/A	#N/A		#DIV/0!		4										#DIV/0!	#N/A	#N/A	#N/A	#N/A	#N/A	#N/A	#N/A	#N/A	#N/A	#N/A	#N/A
	#DIV/0!	#DIV/0!	#DIV/0!	#DIV/0!	#DIV/0!	#DIV/0!	#DIV/0!	#DIV/0!	#DIV/0!	#DIV/0!	#DIV/0!	#DIV/0!	#DIV/0!	#DIV/0!	#DIV/0!	#DIV/0!	#DIV/0!					#DIV/0!	#N/A	#N/A		#DIV/0!		4										#DIV/0!	#N/A	#N/A	#N/A	#N/A	#N/A	#N/A	#N/A	#N/A	#N/A	#N/A	#N/A
																						#DIV/0!	#N/A	#N/A		#DIV/0!		4
																						0.519994	0.519994	0.529879		0.00988551	0.00988551	4											0.8	1.57785	1.88722	2.1966	3.12473	#N/A	#N/A	#N/A	#N/A	#N/A	#N/A
																						0.441306	0.441306	0.437661		-0.00364501	-0.00364501	4											1.6	1.84204	2.28487	2.72771	4.05621	#N/A	#N/A	#N/A	#N/A	#N/A	#N/A
																						0.285201	0.285201	0.287536		0.0023354	0.0023354	4											4	2.63461	3.47782	4.32103	6.85066	#N/A	#N/A	#N/A	#N/A	#N/A	#N/A
																						0.180897	0.180897	0.182947		0.00204954	0.00204954	4											8	3.95557	5.46607	6.97657	11.5081	#N/A	#N/A	#N/A	#N/A	#N/A	#N/A
																						0.108295	0.108295	0.105903		-0.00239204	-0.00239204	4											16	6.59748	9.44257	12.2877	20.8229	#N/A	#N/A	#N/A	#N/A	#N/A	#N/A
																						#DIV/0!	#N/A	#N/A		#DIV/0!		4											#N/A	#N/A	#N/A	#N/A	#N/A	#N/A	#N/A	#N/A	#N/A	#N/A	#N/A
																						#DIV/0!	#N/A	#N/A		#DIV/0!		4											#N/A	#N/A	#N/A	#N/A	#N/A	#N/A	#N/A	#N/A	#N/A	#N/A	#N/A
																						#DIV/0!	#N/A	#N/A		#DIV/0!		4											#N/A	#N/A	#N/A	#N/A	#N/A	#N/A	#N/A	#N/A	#N/A	#N/A	#N/A
																						#DIV/0!	#N/A	#N/A		#DIV/0!		4											#N/A	#N/A	#N/A	#N/A	#N/A	#N/A	#N/A	#N/A	#N/A	#N/A	#N/A
																						#DIV/0!	#N/A	#N/A		#DIV/0!		4											#N/A	#N/A	#N/A	#N/A	#N/A	#N/A	#N/A	#N/A	#N/A	#N/A	#N/A
																						#DIV/0!	#N/A	#N/A		#DIV/0!		4											#N/A	#N/A	#N/A	#N/A	#N/A	#N/A	#N/A	#N/A	#N/A	#N/A	#N/A
																						#DIV/0!	#N/A	#N/A		#DIV/0!		4											#N/A	#N/A	#N/A	#N/A	#N/A	#N/A	#N/A	#N/A	#N/A	#N/A	#N/A
																						#DIV/0!	#N/A	#N/A		#DIV/0!		4											#N/A	#N/A	#N/A	#N/A	#N/A	#N/A	#N/A	#N/A	#N/A	#N/A	#N/A
																						#DIV/0!	#N/A	#N/A		#DIV/0!		4											#N/A	#N/A	#N/A	#N/A	#N/A	#N/A	#N/A	#N/A	#N/A	#N/A	#N/A
																						#DIV/0!	#N/A	#N/A		#DIV/0!		4											#N/A	#N/A	#N/A	#N/A	#N/A	#N/A	#N/A	#N/A	#N/A	#N/A	#N/A
																						0.450106	0.450106	0.455249		0.00514352	0.00514352	4
																						0.365898	0.365898	0.366608		0.000710043	0.000710043	4												0.63857	0.519994	0.450106	0.326797	#DIV/0!	#DIV/0!	#DIV/0!	#DIV/0!	#DIV/0!	#DIV/0!
																						0.233198	0.233198	0.231426		-0.00177183	-0.00177183	4												0.547915	0.441306	0.365898	0.251193	#DIV/0!	#DIV/0!	#DIV/0!	#DIV/0!	#DIV/0!	#DIV/0!
																						0.141201	0.141201	0.143337		0.00213583	0.00213583	4												0.373134	0.285201	0.233198	0.143266	#DIV/0!	#DIV/0!	#DIV/0!	#DIV/0!	#DIV/0!	#DIV/0!
																						0.0847458	0.0847458	0.0813825		-0.00336325	-0.00336325	4												0.25	0.180897	0.141201	0.0834725	#DIV/0!	#DIV/0!	#DIV/0!	#DIV/0!	#DIV/0!	#DIV/0!
																						#DIV/0!	#N/A	#N/A		#DIV/0!		4												0.160256	0.108295	0.0847458	0.0501002	#DIV/0!	#DIV/0!	#DIV/0!	#DIV/0!	#DIV/0!	#DIV/0!
																						#DIV/0!	#N/A	#N/A		#DIV/0!		4												#DIV/0!	#DIV/0!	#DIV/0!	#DIV/0!	#DIV/0!	#DIV/0!	#DIV/0!	#DIV/0!	#DIV/0!	#DIV/0!
																						#DIV/0!	#N/A	#N/A		#DIV/0!		4												#DIV/0!	#DIV/0!	#DIV/0!	#DIV/0!	#DIV/0!	#DIV/0!	#DIV/0!	#DIV/0!	#DIV/0!	#DIV/0!
																						#DIV/0!	#N/A	#N/A		#DIV/0!		4												#DIV/0!	#DIV/0!	#DIV/0!	#DIV/0!	#DIV/0!	#DIV/0!	#DIV/0!	#DIV/0!	#DIV/0!	#DIV/0!
																						#DIV/0!	#N/A	#N/A		#DIV/0!		4												#DIV/0!	#DIV/0!	#DIV/0!	#DIV/0!	#DIV/0!	#DIV/0!	#DIV/0!	#DIV/0!	#DIV/0!	#DIV/0!
																						#DIV/0!	#N/A	#N/A		#DIV/0!		4												#DIV/0!	#DIV/0!	#DIV/0!	#DIV/0!	#DIV/0!	#DIV/0!	#DIV/0!	#DIV/0!	#DIV/0!	#DIV/0!
																						#DIV/0!	#N/A	#N/A		#DIV/0!		4												#DIV/0!	#DIV/0!	#DIV/0!	#DIV/0!	#DIV/0!	#DIV/0!	#DIV/0!	#DIV/0!	#DIV/0!	#DIV/0!
																						#DIV/0!	#N/A	#N/A		#DIV/0!		4												#DIV/0!	#DIV/0!	#DIV/0!	#DIV/0!	#DIV/0!	#DIV/0!	#DIV/0!	#DIV/0!	#DIV/0!	#DIV/0!
																						#DIV/0!	#N/A	#N/A		#DIV/0!		4												#DIV/0!	#DIV/0!	#DIV/0!	#DIV/0!	#DIV/0!	#DIV/0!	#DIV/0!	#DIV/0!	#DIV/0!	#DIV/0!
																						#DIV/0!	#N/A	#N/A		#DIV/0!		4												#DIV/0!	#DIV/0!	#DIV/0!	#DIV/0!	#DIV/0!	#DIV/0!	#DIV/0!	#DIV/0!	#DIV/0!	#DIV/0!
																						0.326797	0.326797	0.320028		-0.0067695	-0.0067695	4												#DIV/0!	#DIV/0!	#DIV/0!	#DIV/0!	#DIV/0!	#DIV/0!	#DIV/0!	#DIV/0!	#DIV/0!	#DIV/0!
																						0.251193	0.251193	0.246536		-0.00465765	-0.00465765	4
																						0.143266	0.143266	0.145971		0.00270487	0.00270487	4												1/s	0	0.05	0.1	0.25	0	0	0	0	0
																						0.0834725	0.0834725	0.0868955		0.00342306	0.00342306	4											1	0.8	1.57785	1.88722	2.1966	3.12473	#N/A	#N/A	#N/A	#N/A	#N/A
																						0.0501002	0.0501002	0.048024		-0.00207616	-0.00207616	4											2	1.6	1.84204	2.28487	2.72771	4.05621	#N/A	#N/A	#N/A	#N/A	#N/A
																						#DIV/0!	#N/A	#N/A		#DIV/0!		4											3	4	2.63461	3.47782	4.32103	6.85066	#N/A	#N/A	#N/A	#N/A	#N/A
																						#DIV/0!	#N/A	#N/A		#DIV/0!		4											4	8	3.95557	5.46607	6.97657	11.5081	#N/A	#N/A	#N/A	#N/A	#N/A
																						#DIV/0!	#N/A	#N/A		#DIV/0!		4											5	16	6.59748	9.44257	12.2877	20.8229	#N/A	#N/A	#N/A	#N/A	#N/A
																						#DIV/0!	#N/A	#N/A		#DIV/0!		4											6	#N/A	#N/A	#N/A	#N/A	#N/A	#N/A	#N/A	#N/A	#N/A	#N/A
																						#DIV/0!	#N/A	#N/A		#DIV/0!		4											7	#N/A	#N/A	#N/A	#N/A	#N/A	#N/A	#N/A	#N/A	#N/A	#N/A
																						#DIV/0!	#N/A	#N/A		#DIV/0!		4											8	#N/A	#N/A	#N/A	#N/A	#N/A	#N/A	#N/A	#N/A	#N/A	#N/A
																						#DIV/0!	#N/A	#N/A		#DIV/0!		4											9	#N/A	#N/A	#N/A	#N/A	#N/A	#N/A	#N/A	#N/A	#N/A	#N/A
																						#DIV/0!	#N/A	#N/A		#DIV/0!		4											10	#N/A	#N/A	#N/A	#N/A	#N/A	#N/A	#N/A	#N/A	#N/A	#N/A
																						#DIV/0!	#N/A	#N/A		#DIV/0!		4											11	#N/A	#N/A	#N/A	#N/A	#N/A	#N/A	#N/A	#N/A	#N/A	#N/A
																						#DIV/0!	#N/A	#N/A		#DIV/0!		4											12	#N/A	#N/A	#N/A	#N/A	#N/A	#N/A	#N/A	#N/A	#N/A	#N/A
																						#DIV/0!	#N/A	#N/A		#DIV/0!		4											13	#N/A	#N/A	#N/A	#N/A	#N/A	#N/A	#N/A	#N/A	#N/A	#N/A
																						#DIV/0!	#N/A	#N/A		#DIV/0!		4											14	#N/A	#N/A	#N/A	#N/A	#N/A	#N/A	#N/A	#N/A	#N/A	#N/A
																						#DIV/0!	#N/A	#N/A		#DIV/0!		4											15	#N/A	#N/A	#N/A	#N/A	#N/A	#N/A	#N/A	#N/A	#N/A	#N/A
																						#DIV/0!	#N/A	#N/A		#DIV/0!		4
																						#DIV/0!	#N/A	#N/A		#DIV/0!		4
																						#DIV/0!	#N/A	#N/A		#DIV/0!		4
																						#DIV/0!	#N/A	#N/A		#DIV/0!		4
																						#DIV/0!	#N/A	#N/A		#DIV/0!		4
																						#DIV/0!	#N/A	#N/A		#DIV/0!		4
																						#DIV/0!	#N/A	#N/A		#DIV/0!		4
																						#DIV/0!	#N/A	#N/A		#DIV/0!		4
																						#DIV/0!	#N/A	#N/A		#DIV/0!		4
																						#DIV/0!	#N/A	#N/A		#DIV/0!		4
																						#DIV/0!	#N/A	#N/A		#DIV/0!		4
																						#DIV/0!	#N/A	#N/A		#DIV/0!		4
																						#DIV/0!	#N/A	#N/A		#DIV/0!		4
																						#DIV/0!	#N/A	#N/A		#DIV/0!		4
																						#DIV/0!	#N/A	#N/A		#DIV/0!		4
																						#DIV/0!	#N/A	#N/A		#DIV/0!		4
																						#DIV/0!	#N/A	#N/A		#DIV/0!		4
																						#DIV/0!	#N/A	#N/A		#DIV/0!		4
																						#DIV/0!	#N/A	#N/A		#DIV/0!		4
																						#DIV/0!	#N/A	#N/A		#DIV/0!		4
																						#DIV/0!	#N/A	#N/A		#DIV/0!		4
																						#DIV/0!	#N/A	#N/A		#DIV/0!		4
																						#DIV/0!	#N/A	#N/A		#DIV/0!		4
																						#DIV/0!	#N/A	#N/A		#DIV/0!		4
																						#DIV/0!	#N/A	#N/A		#DIV/0!		4
																						#DIV/0!	#N/A	#N/A		#DIV/0!		4
																						#DIV/0!	#N/A	#N/A		#DIV/0!		4
																						#DIV/0!	#N/A	#N/A		#DIV/0!		4
																						#DIV/0!	#N/A	#N/A		#DIV/0!		4
																						#DIV/0!	#N/A	#N/A		#DIV/0!		4
																						#DIV/0!	#N/A	#N/A		#DIV/0!		4
																						#DIV/0!	#N/A	#N/A		#DIV/0!		4
																						#DIV/0!	#N/A	#N/A		#DIV/0!		4
																						#DIV/0!	#N/A	#N/A		#DIV/0!		4
																						#DIV/0!	#N/A	#N/A		#DIV/0!		4
																						#DIV/0!	#N/A	#N/A		#DIV/0!		4
																						#DIV/0!	#N/A	#N/A		#DIV/0!		4
																						#DIV/0!	#N/A	#N/A		#DIV/0!		4
																						#DIV/0!	#N/A	#N/A		#DIV/0!		4
																						#DIV/0!	#N/A	#N/A		#DIV/0!		4
																						#DIV/0!	#N/A	#N/A		#DIV/0!		4
																						#DIV/0!	#N/A	#N/A		#DIV/0!		4
																						#DIV/0!	#N/A	#N/A		#DIV/0!		4
																						#DIV/0!	#N/A	#N/A		#DIV/0!		4
																						#DIV/0!	#N/A	#N/A		#DIV/0!		4
																						#DIV/0!	#N/A	#N/A		#DIV/0!		4
																						#DIV/0!	#N/A	#N/A		#DIV/0!		4
																						#DIV/0!	#N/A	#N/A		#DIV/0!		4
																						#DIV/0!	#N/A	#N/A		#DIV/0!		4
																						#DIV/0!	#N/A	#N/A		#DIV/0!		4
																						#DIV/0!	#N/A	#N/A		#DIV/0!		4
																						#DIV/0!	#N/A	#N/A		#DIV/0!		4
																						#DIV/0!	#N/A	#N/A		#DIV/0!		4
																						#DIV/0!	#N/A	#N/A		#DIV/0!		4
																						#DIV/0!	#N/A	#N/A		#DIV/0!		4
																						#DIV/0!	#N/A	#N/A		#DIV/0!		4
																						#DIV/0!	#N/A	#N/A		#DIV/0!		4
																						#DIV/0!	#N/A	#N/A		#DIV/0!		4
																						#DIV/0!	#N/A	#N/A		#DIV/0!		4
																						#DIV/0!	#N/A	#N/A		#DIV/0!		4
																						#DIV/0!	#N/A	#N/A		#DIV/0!		4
																						#DIV/0!	#N/A	#N/A		#DIV/0!		4
																						#DIV/0!	#N/A	#N/A		#DIV/0!		4
																						#DIV/0!	#N/A	#N/A		#DIV/0!		4
																						#DIV/0!	#N/A	#N/A		#DIV/0!		4
																						#DIV/0!	#N/A	#N/A		#DIV/0!		4
																						#DIV/0!	#N/A	#N/A		#DIV/0!		4
																						#DIV/0!	#N/A	#N/A		#DIV/0!		4
																						#DIV/0!	#N/A	#N/A		#DIV/0!		4
																						#DIV/0!	#N/A	#N/A		#DIV/0!		4
																						#DIV/0!	#N/A	#N/A		#DIV/0!		4
																						#DIV/0!	#N/A	#N/A		#DIV/0!		4
																						#DIV/0!	#N/A	#N/A		#DIV/0!		4
																						#DIV/0!	#N/A	#N/A		#DIV/0!		4
																						#DIV/0!	#N/A	#N/A		#DIV/0!		4
																						#DIV/0!	#N/A	#N/A		#DIV/0!		4
																						#DIV/0!	#N/A	#N/A		#DIV/0!		4
																						#DIV/0!	#N/A	#N/A		#DIV/0!		4
																						#DIV/0!	#N/A	#N/A		#DIV/0!		4
																						#DIV/0!	#N/A	#N/A		#DIV/0!		4
																						#DIV/0!	#N/A	#N/A		#DIV/0!		4
																						#DIV/0!	#N/A	#N/A		#DIV/0!		4
																						#DIV/0!	#N/A	#N/A		#DIV/0!		4
																						#DIV/0!	#N/A	#N/A		#DIV/0!		4
																						#DIV/0!	#N/A	#N/A		#DIV/0!		4
																						#DIV/0!	#N/A	#N/A		#DIV/0!		4
																						#DIV/0!	#N/A	#N/A		#DIV/0!		4
																						#DIV/0!	#N/A	#N/A		#DIV/0!		4
																						#DIV/0!	#N/A	#N/A		#DIV/0!		4
																						#DIV/0!	#N/A	#N/A		#DIV/0!		4
																						#DIV/0!	#N/A	#N/A		#DIV/0!		4
																						#DIV/0!	#N/A	#N/A		#DIV/0!		4
																						#DIV/0!	#N/A	#N/A		#DIV/0!		4
																						#DIV/0!	#N/A	#N/A		#DIV/0!		4
																						#DIV/0!	#N/A	#N/A		#DIV/0!		4
																						#DIV/0!	#N/A	#N/A		#DIV/0!		4
																						#DIV/0!	#N/A	#N/A		#DIV/0!		4
																						#DIV/0!	#N/A	#N/A		#DIV/0!		4
																						#DIV/0!	#N/A	#N/A		#DIV/0!		4
																						#DIV/0!	#N/A	#N/A		#DIV/0!		4
																						#DIV/0!	#N/A	#N/A		#DIV/0!		4
																						#DIV/0!	#N/A	#N/A		#DIV/0!		4
																						#DIV/0!	#N/A	#N/A		#DIV/0!		4
																						#DIV/0!	#N/A	#N/A		#DIV/0!		4
																						#DIV/0!	#N/A	#N/A		#DIV/0!		4
																						#DIV/0!	#N/A	#N/A		#DIV/0!		4
																						#DIV/0!	#N/A	#N/A		#DIV/0!		4
																						#DIV/0!	#N/A	#N/A		#DIV/0!		4
																						#DIV/0!	#N/A	#N/A		#DIV/0!		4
																						#DIV/0!	#N/A	#N/A		#DIV/0!		4
																						#DIV/0!	#N/A	#N/A		#DIV/0!		4
																						#DIV/0!	#N/A	#N/A		#DIV/0!		4
																						#DIV/0!	#N/A	#N/A		#DIV/0!		4
																						#DIV/0!	#N/A	#N/A		#DIV/0!		4
																						#DIV/0!	#N/A	#N/A		#DIV/0!		4
																						#DIV/0!	#N/A	#N/A		#DIV/0!		4
																						#DIV/0!	#N/A	#N/A		#DIV/0!		4
																						#DIV/0!	#N/A	#N/A		#DIV/0!		4
																						#DIV/0!	#N/A	#N/A		#DIV/0!		4
																						#DIV/0!	#N/A	#N/A		#DIV/0!		4
																						#DIV/0!	#N/A	#N/A		#DIV/0!		4
																						#DIV/0!	#N/A	#N/A		#DIV/0!		4
																						#DIV/0!	#N/A	#N/A		#DIV/0!		4
																						#DIV/0!	#N/A	#N/A		#DIV/0!		4
																						#DIV/0!	#N/A	#N/A		#DIV/0!		4
																						#DIV/0!	#N/A	#N/A		#DIV/0!		4
																						#DIV/0!	#N/A	#N/A		#DIV/0!		4
																						#DIV/0!	#N/A	#N/A		#DIV/0!		4
																						#DIV/0!	#N/A	#N/A		#DIV/0!		4
																						#DIV/0!	#N/A	#N/A		#DIV/0!		4
																						#DIV/0!	#N/A	#N/A		#DIV/0!		4
																						#DIV/0!	#N/A	#N/A		#DIV/0!		4
																						#DIV/0!	#N/A	#N/A		#DIV/0!		4
																						#DIV/0!	#N/A	#N/A		#DIV/0!		4
																						#DIV/0!	#N/A	#N/A		#DIV/0!		4
																						#DIV/0!	#N/A	#N/A		#DIV/0!		4
																						#DIV/0!	#N/A	#N/A		#DIV/0!		4
																						#DIV/0!	#N/A	#N/A		#DIV/0!		4
																						#DIV/0!	#N/A	#N/A		#DIV/0!		4
																						#DIV/0!	#N/A	#N/A		#DIV/0!		4
																						#DIV/0!	#N/A	#N/A		#DIV/0!		4
																						#DIV/0!	#N/A	#N/A		#DIV/0!		4
																						#DIV/0!	#N/A	#N/A		#DIV/0!		4
																						#DIV/0!	#N/A	#N/A		#DIV/0!		4
																						#DIV/0!	#N/A	#N/A		#DIV/0!		4
																						#DIV/0!	#N/A	#N/A		#DIV/0!		4
																						#DIV/0!	#N/A	#N/A		#DIV/0!		4
																						#DIV/0!	#N/A	#N/A		#DIV/0!		4
																						#DIV/0!	#N/A	#N/A		#DIV/0!		4
																						#DIV/0!	#N/A	#N/A		#DIV/0!		4
																						#DIV/0!	#N/A	#N/A		#DIV/0!		4
																						#DIV/0!	#N/A	#N/A		#DIV/0!		4
																						#DIV/0!	#N/A	#N/A		#DIV/0!		4
																						#DIV/0!	#N/A	#N/A		#DIV/0!		4
																						#DIV/0!	#N/A	#N/A		#DIV/0!		4
																						#DIV/0!	#N/A	#N/A		#DIV/0!		4
																						#DIV/0!	#N/A	#N/A		#DIV/0!		4
																						#DIV/0!	#N/A	#N/A		#DIV/0!		4
																						#DIV/0!	#N/A	#N/A		#DIV/0!		4
																						#DIV/0!	#N/A	#N/A		#DIV/0!		4
																						#DIV/0!	#N/A	#N/A		#DIV/0!		4
																						#DIV/0!	#N/A	#N/A		#DIV/0!		4
																						#DIV/0!	#N/A	#N/A		#DIV/0!		4
																						#DIV/0!	#N/A	#N/A		#DIV/0!		4
																						#DIV/0!	#N/A	#N/A		#DIV/0!		4
																						#DIV/0!	#N/A	#N/A		#DIV/0!		4
																						#DIV/0!	#N/A	#N/A		#DIV/0!		4
																						#DIV/0!	#N/A	#N/A		#DIV/0!		4
																						#DIV/0!	#N/A	#N/A		#DIV/0!		4
																						#DIV/0!	#N/A	#N/A		#DIV/0!		4
																						#DIV/0!	#N/A	#N/A		#DIV/0!		4
																						#DIV/0!	#N/A	#N/A		#DIV/0!		4
																						#DIV/0!	#N/A	#N/A		#DIV/0!		4
																						#DIV/0!	#N/A	#N/A		#DIV/0!		4
																						#DIV/0!	#N/A	#N/A		#DIV/0!		4
																						#DIV/0!	#N/A	#N/A		#DIV/0!		4
																						#DIV/0!	#N/A	#N/A		#DIV/0!		4
[truncated: 54 more columns]

## Sheet: Modifier equation
																							Calculated values
		No Inhibitor	[I]1	[I]2	[I]3	[I]4	[I]5	[I]6	[I]7	[I]8	[I]9	[I]10	[I]11	[I]12	[I]13	[I]14	[I]15					Ki	No Inhibitor	[I]1	[I]2	[I]3	[I]4	[I]5	[I]6	[I]7	[I]8	[I]9	[I]10	[I]11	[I]12	[I]13	[I]14	[I]15
		0	0.05	0.1	0.25	0	0	0	0	0	0	0	0	0	0	0	0	K1	0.251956	V1	0.764245	0.309954	0	0.05	0.1	0.25	0	0	0	0	0	0	0	0	0	0	0	0
[S]1	1.25	0.63857	0.519994	0.450106	0.326797	0	0	0	0	0	0	0	0	0	0	0	0	K2	0.851485	V2	0.0777382		0.636042	0.527434	0.452604	0.323334	#DIV/0!	#DIV/0!	#DIV/0!	#DIV/0!	#DIV/0!	#DIV/0!	#DIV/0!	#DIV/0!	#DIV/0!	#DIV/0!	#DIV/0!	#DIV/0!		0.636042	0.527434	0.452604	0.323334	0	0	0	0	0	0
[S]2	0.625	0.547915	0.441306	0.365898	0.251193	0	0	0	0	0	0	0	0	0	0	0	0						0.544672	0.435366	0.364534	0.249942	#DIV/0!	#DIV/0!	#DIV/0!	#DIV/0!	#DIV/0!	#DIV/0!	#DIV/0!	#DIV/0!	#DIV/0!	#DIV/0!	#DIV/0!	#DIV/0!		0.544672	0.435366	0.364534	0.249942	0	0	0	0	0	0
[S]3	0.25	0.373134	0.285201	0.233198	0.143266	0	0	0	0	0	0	0	0	0	0	0	0						0.380634	0.285734	0.230171	0.148691	#DIV/0!	#DIV/0!	#DIV/0!	#DIV/0!	#DIV/0!	#DIV/0!	#DIV/0!	#DIV/0!	#DIV/0!	#DIV/0!	#DIV/0!	#DIV/0!		0.380634	0.285734	0.230171	0.148691	0	0	0	0	0	0
[S]4	0.125	0.25	0.180897	0.141201	0.0834725	0	0	0	0	0	0	0	0	0	0	0	0						0.253427	0.18167	0.142581	0.0887617	#DIV/0!	#DIV/0!	#DIV/0!	#DIV/0!	#DIV/0!	#DIV/0!	#DIV/0!	#DIV/0!	#DIV/0!	#DIV/0!	#DIV/0!	#DIV/0!		0.253427	0.18167	0.142581	0.0887617	0	0	0	0	0	0
[S]5	0.0625	0.160256	0.108295	0.0847458	0.0501002	0	0	0	0	0	0	0	0	0	0	0	0						0.151898	0.105109	0.080962	0.0491458	#DIV/0!	#DIV/0!	#DIV/0!	#DIV/0!	#DIV/0!	#DIV/0!	#DIV/0!	#DIV/0!	#DIV/0!	#DIV/0!	#DIV/0!	#DIV/0!		0.151898	0.105109	0.080962	0.0491458	0	0	0	0	0	0
[S]6	0	0	0	0	0	0	0	0	0	0	0	0	0	0	0	0	0			Sum R2	0.000361787		#DIV/0!	#DIV/0!	#DIV/0!	#DIV/0!	#DIV/0!	#DIV/0!	#DIV/0!	#DIV/0!	#DIV/0!	#DIV/0!	#DIV/0!	#DIV/0!	#DIV/0!	#DIV/0!	#DIV/0!	#DIV/0!		0	0	0	0	0	0	0	0	0	0
[S]7	0	0	0	0	0	0	0	0	0	0	0	0	0	0	0	0	0			Sum residuals %	0.372397		#DIV/0!	#DIV/0!	#DIV/0!	#DIV/0!	#DIV/0!	#DIV/0!	#DIV/0!	#DIV/0!	#DIV/0!	#DIV/0!	#DIV/0!	#DIV/0!	#DIV/0!	#DIV/0!	#DIV/0!	#DIV/0!		0	0	0	0	0	0	0	0	0	0
[S]8	0	0	0	0	0	0	0	0	0	0	0	0	0	0	0	0	0						#DIV/0!	#DIV/0!	#DIV/0!	#DIV/0!	#DIV/0!	#DIV/0!	#DIV/0!	#DIV/0!	#DIV/0!	#DIV/0!	#DIV/0!	#DIV/0!	#DIV/0!	#DIV/0!	#DIV/0!	#DIV/0!		0	0	0	0	0	0	0	0	0	0
[S]9	0	0	0	0	0	0	0	0	0	0	0	0	0	0	0	0	0						#DIV/0!	#DIV/0!	#DIV/0!	#DIV/0!	#DIV/0!	#DIV/0!	#DIV/0!	#DIV/0!	#DIV/0!	#DIV/0!	#DIV/0!	#DIV/0!	#DIV/0!	#DIV/0!	#DIV/0!	#DIV/0!		0	0	0	0	0	0	0	0	0	0
[S]10	0	0	0	0	0	0	0	0	0	0	0	0	0	0	0	0	0						#DIV/0!	#DIV/0!	#DIV/0!	#DIV/0!	#DIV/0!	#DIV/0!	#DIV/0!	#DIV/0!	#DIV/0!	#DIV/0!	#DIV/0!	#DIV/0!	#DIV/0!	#DIV/0!	#DIV/0!	#DIV/0!		0	0	0	0	0	0	0	0	0	0
[S]11	0	0	0	0	0	0	0	0	0	0	0	0	0	0	0	0	0						#DIV/0!	#DIV/0!	#DIV/0!	#DIV/0!	#DIV/0!	#DIV/0!	#DIV/0!	#DIV/0!	#DIV/0!	#DIV/0!	#DIV/0!	#DIV/0!	#DIV/0!	#DIV/0!	#DIV/0!	#DIV/0!		0	0	0	0	0	0	0	0	0	0
[S]12	0	0	0	0	0	0	0	0	0	0	0	0	0	0	0	0	0						#DIV/0!	#DIV/0!	#DIV/0!	#DIV/0!	#DIV/0!	#DIV/0!	#DIV/0!	#DIV/0!	#DIV/0!	#DIV/0!	#DIV/0!	#DIV/0!	#DIV/0!	#DIV/0!	#DIV/0!	#DIV/0!		0	0	0	0	0	0	0	0	0	0
[S]13	0	0	0	0	0	0	0	0	0	0	0	0	0	0	0	0	0						#DIV/0!	#DIV/0!	#DIV/0!	#DIV/0!	#DIV/0!	#DIV/0!	#DIV/0!	#DIV/0!	#DIV/0!	#DIV/0!	#DIV/0!	#DIV/0!	#DIV/0!	#DIV/0!	#DIV/0!	#DIV/0!		0	0	0	0	0	0	0	0	0	0
[S]14	0	0	0	0	0	0	0	0	0	0	0	0	0	0	0	0	0						#DIV/0!	#DIV/0!	#DIV/0!	#DIV/0!	#DIV/0!	#DIV/0!	#DIV/0!	#DIV/0!	#DIV/0!	#DIV/0!	#DIV/0!	#DIV/0!	#DIV/0!	#DIV/0!	#DIV/0!	#DIV/0!		0	0	0	0	0	0	0	0	0	0
[S]15	0	0	0	0	0	0	0	0	0	0	0	0	0	0	0	0	0						#DIV/0!	#DIV/0!	#DIV/0!	#DIV/0!	#DIV/0!	#DIV/0!	#DIV/0!	#DIV/0!	#DIV/0!	#DIV/0!	#DIV/0!	#DIV/0!	#DIV/0!	#DIV/0!	#DIV/0!	#DIV/0!		0	0	0	0	0	0	0	0	0	0
	1	1	1	1	1	#DIV/0!	#DIV/0!	#DIV/0!	#DIV/0!	#DIV/0!	#DIV/0!	#DIV/0!	#DIV/0!	#DIV/0!	#DIV/0!	#DIV/0!	#DIV/0!																					1.25	1.25	0.636042	0.527434	0.452604	0.323334	#N/A	#N/A	#N/A	#N/A	#N/A	#N/A
	1	1	1	1	1	#DIV/0!	#DIV/0!	#DIV/0!	#DIV/0!	#DIV/0!	#DIV/0!	#DIV/0!	#DIV/0!	#DIV/0!	#DIV/0!	#DIV/0!	#DIV/0!					0.63857	0.63857	0.636042		-0.00252797	-0.00252797	5										0.625	0.625	0.544672	0.435366	0.364534	0.249942	#N/A	#N/A	#N/A	#N/A	#N/A	#N/A
	1	1	1	1	1	#DIV/0!	#DIV/0!	#DIV/0!	#DIV/0!	#DIV/0!	#DIV/0!	#DIV/0!	#DIV/0!	#DIV/0!	#DIV/0!	#DIV/0!	#DIV/0!					0.547915	0.547915	0.544672		-0.00324329	-0.00324329	5										0.25	0.25	0.380634	0.285734	0.230171	0.148691	#N/A	#N/A	#N/A	#N/A	#N/A	#N/A
	1	1	1	1	1	#DIV/0!	#DIV/0!	#DIV/0!	#DIV/0!	#DIV/0!	#DIV/0!	#DIV/0!	#DIV/0!	#DIV/0!	#DIV/0!	#DIV/0!	#DIV/0!					0.373134	0.373134	0.380634		0.00749928	0.00749928	5										0.125	0.125	0.253427	0.18167	0.142581	0.0887617	#N/A	#N/A	#N/A	#N/A	#N/A	#N/A
	1	1	1	1	1	#DIV/0!	#DIV/0!	#DIV/0!	#DIV/0!	#DIV/0!	#DIV/0!	#DIV/0!	#DIV/0!	#DIV/0!	#DIV/0!	#DIV/0!	#DIV/0!					0.25	0.25	0.253427		0.00342657	0.00342657	5										0.0625	0.0625	0.151898	0.105109	0.080962	0.0491458	#N/A	#N/A	#N/A	#N/A	#N/A	#N/A
	#DIV/0!	#DIV/0!	#DIV/0!	#DIV/0!	#DIV/0!	#DIV/0!	#DIV/0!	#DIV/0!	#DIV/0!	#DIV/0!	#DIV/0!	#DIV/0!	#DIV/0!	#DIV/0!	#DIV/0!	#DIV/0!	#DIV/0!					0.160256	0.160256	0.151898		-0.00835811	-0.00835811	5										#DIV/0!	#N/A	#N/A	#N/A	#N/A	#N/A	#N/A	#N/A	#N/A	#N/A	#N/A	#N/A
	#DIV/0!	#DIV/0!	#DIV/0!	#DIV/0!	#DIV/0!	#DIV/0!	#DIV/0!	#DIV/0!	#DIV/0!	#DIV/0!	#DIV/0!	#DIV/0!	#DIV/0!	#DIV/0!	#DIV/0!	#DIV/0!	#DIV/0!					#DIV/0!	#N/A	#N/A		#DIV/0!		5										#DIV/0!	#N/A	#N/A	#N/A	#N/A	#N/A	#N/A	#N/A	#N/A	#N/A	#N/A	#N/A
	#DIV/0!	#DIV/0!	#DIV/0!	#DIV/0!	#DIV/0!	#DIV/0!	#DIV/0!	#DIV/0!	#DIV/0!	#DIV/0!	#DIV/0!	#DIV/0!	#DIV/0!	#DIV/0!	#DIV/0!	#DIV/0!	#DIV/0!					#DIV/0!	#N/A	#N/A		#DIV/0!		5										#DIV/0!	#N/A	#N/A	#N/A	#N/A	#N/A	#N/A	#N/A	#N/A	#N/A	#N/A	#N/A
	#DIV/0!	#DIV/0!	#DIV/0!	#DIV/0!	#DIV/0!	#DIV/0!	#DIV/0!	#DIV/0!	#DIV/0!	#DIV/0!	#DIV/0!	#DIV/0!	#DIV/0!	#DIV/0!	#DIV/0!	#DIV/0!	#DIV/0!					#DIV/0!	#N/A	#N/A		#DIV/0!		5										#DIV/0!	#N/A	#N/A	#N/A	#N/A	#N/A	#N/A	#N/A	#N/A	#N/A	#N/A	#N/A
	#DIV/0!	#DIV/0!	#DIV/0!	#DIV/0!	#DIV/0!	#DIV/0!	#DIV/0!	#DIV/0!	#DIV/0!	#DIV/0!	#DIV/0!	#DIV/0!	#DIV/0!	#DIV/0!	#DIV/0!	#DIV/0!	#DIV/0!					#DIV/0!	#N/A	#N/A		#DIV/0!		5										#DIV/0!	#N/A	#N/A	#N/A	#N/A	#N/A	#N/A	#N/A	#N/A	#N/A	#N/A	#N/A
	#DIV/0!	#DIV/0!	#DIV/0!	#DIV/0!	#DIV/0!	#DIV/0!	#DIV/0!	#DIV/0!	#DIV/0!	#DIV/0!	#DIV/0!	#DIV/0!	#DIV/0!	#DIV/0!	#DIV/0!	#DIV/0!	#DIV/0!					#DIV/0!	#N/A	#N/A		#DIV/0!		5										#DIV/0!	#N/A	#N/A	#N/A	#N/A	#N/A	#N/A	#N/A	#N/A	#N/A	#N/A	#N/A
	#DIV/0!	#DIV/0!	#DIV/0!	#DIV/0!	#DIV/0!	#DIV/0!	#DIV/0!	#DIV/0!	#DIV/0!	#DIV/0!	#DIV/0!	#DIV/0!	#DIV/0!	#DIV/0!	#DIV/0!	#DIV/0!	#DIV/0!					#DIV/0!	#N/A	#N/A		#DIV/0!		5										#DIV/0!	#N/A	#N/A	#N/A	#N/A	#N/A	#N/A	#N/A	#N/A	#N/A	#N/A	#N/A
	#DIV/0!	#DIV/0!	#DIV/0!	#DIV/0!	#DIV/0!	#DIV/0!	#DIV/0!	#DIV/0!	#DIV/0!	#DIV/0!	#DIV/0!	#DIV/0!	#DIV/0!	#DIV/0!	#DIV/0!	#DIV/0!	#DIV/0!					#DIV/0!	#N/A	#N/A		#DIV/0!		5										#DIV/0!	#N/A	#N/A	#N/A	#N/A	#N/A	#N/A	#N/A	#N/A	#N/A	#N/A	#N/A
	#DIV/0!	#DIV/0!	#DIV/0!	#DIV/0!	#DIV/0!	#DIV/0!	#DIV/0!	#DIV/0!	#DIV/0!	#DIV/0!	#DIV/0!	#DIV/0!	#DIV/0!	#DIV/0!	#DIV/0!	#DIV/0!	#DIV/0!					#DIV/0!	#N/A	#N/A		#DIV/0!		5										#DIV/0!	#N/A	#N/A	#N/A	#N/A	#N/A	#N/A	#N/A	#N/A	#N/A	#N/A	#N/A
	#DIV/0!	#DIV/0!	#DIV/0!	#DIV/0!	#DIV/0!	#DIV/0!	#DIV/0!	#DIV/0!	#DIV/0!	#DIV/0!	#DIV/0!	#DIV/0!	#DIV/0!	#DIV/0!	#DIV/0!	#DIV/0!	#DIV/0!					#DIV/0!	#N/A	#N/A		#DIV/0!		5										#DIV/0!	#N/A	#N/A	#N/A	#N/A	#N/A	#N/A	#N/A	#N/A	#N/A	#N/A	#N/A
																						#DIV/0!	#N/A	#N/A		#DIV/0!		5
																						0.519994	0.519994	0.527434		0.00743994	0.00743994	5											0.8	1.57222	1.89597	2.20943	3.09278	#N/A	#N/A	#N/A	#N/A	#N/A	#N/A
																						0.441306	0.441306	0.435366		-0.00594069	-0.00594069	5											1.6	1.83597	2.29692	2.74323	4.00093	#N/A	#N/A	#N/A	#N/A	#N/A	#N/A
																						0.285201	0.285201	0.285734		0.000532785	0.000532785	5											4	2.6272	3.49976	4.3446	6.72538	#N/A	#N/A	#N/A	#N/A	#N/A	#N/A
																						0.180897	0.180897	0.18167		0.000772341	0.000772341	5											8	3.94592	5.5045	7.01356	11.2661	#N/A	#N/A	#N/A	#N/A	#N/A	#N/A
																						0.108295	0.108295	0.105109		-0.00318685	-0.00318685	5											16	6.58335	9.51397	12.3515	20.3476	#N/A	#N/A	#N/A	#N/A	#N/A	#N/A
																						#DIV/0!	#N/A	#N/A		#DIV/0!		5											#N/A	#N/A	#N/A	#N/A	#N/A	#N/A	#N/A	#N/A	#N/A	#N/A	#N/A
																						#DIV/0!	#N/A	#N/A		#DIV/0!		5											#N/A	#N/A	#N/A	#N/A	#N/A	#N/A	#N/A	#N/A	#N/A	#N/A	#N/A
																						#DIV/0!	#N/A	#N/A		#DIV/0!		5											#N/A	#N/A	#N/A	#N/A	#N/A	#N/A	#N/A	#N/A	#N/A	#N/A	#N/A
																						#DIV/0!	#N/A	#N/A		#DIV/0!		5											#N/A	#N/A	#N/A	#N/A	#N/A	#N/A	#N/A	#N/A	#N/A	#N/A	#N/A
																						#DIV/0!	#N/A	#N/A		#DIV/0!		5											#N/A	#N/A	#N/A	#N/A	#N/A	#N/A	#N/A	#N/A	#N/A	#N/A	#N/A
																						#DIV/0!	#N/A	#N/A		#DIV/0!		5											#N/A	#N/A	#N/A	#N/A	#N/A	#N/A	#N/A	#N/A	#N/A	#N/A	#N/A
																						#DIV/0!	#N/A	#N/A		#DIV/0!		5											#N/A	#N/A	#N/A	#N/A	#N/A	#N/A	#N/A	#N/A	#N/A	#N/A	#N/A
																						#DIV/0!	#N/A	#N/A		#DIV/0!		5											#N/A	#N/A	#N/A	#N/A	#N/A	#N/A	#N/A	#N/A	#N/A	#N/A	#N/A
																						#DIV/0!	#N/A	#N/A		#DIV/0!		5											#N/A	#N/A	#N/A	#N/A	#N/A	#N/A	#N/A	#N/A	#N/A	#N/A	#N/A
																						#DIV/0!	#N/A	#N/A		#DIV/0!		5											#N/A	#N/A	#N/A	#N/A	#N/A	#N/A	#N/A	#N/A	#N/A	#N/A	#N/A
																						0.450106	0.450106	0.452604		0.00249868	0.00249868	5
																						0.365898	0.365898	0.364534		-0.00136399	-0.00136399	5												0.63857	0.519994	0.450106	0.326797	#DIV/0!	#DIV/0!	#DIV/0!	#DIV/0!	#DIV/0!	#DIV/0!
																						0.233198	0.233198	0.230171		-0.00302731	-0.00302731	5												0.547915	0.441306	0.365898	0.251193	#DIV/0!	#DIV/0!	#DIV/0!	#DIV/0!	#DIV/0!	#DIV/0!
																						0.141201	0.141201	0.142581		0.00137994	0.00137994	5												0.373134	0.285201	0.233198	0.143266	#DIV/0!	#DIV/0!	#DIV/0!	#DIV/0!	#DIV/0!	#DIV/0!
																						0.0847458	0.0847458	0.080962		-0.00378375	-0.00378375	5												0.25	0.180897	0.141201	0.0834725	#DIV/0!	#DIV/0!	#DIV/0!	#DIV/0!	#DIV/0!	#DIV/0!
																						#DIV/0!	#N/A	#N/A		#DIV/0!		5												0.160256	0.108295	0.0847458	0.0501002	#DIV/0!	#DIV/0!	#DIV/0!	#DIV/0!	#DIV/0!	#DIV/0!
																						#DIV/0!	#N/A	#N/A		#DIV/0!		5												#DIV/0!	#DIV/0!	#DIV/0!	#DIV/0!	#DIV/0!	#DIV/0!	#DIV/0!	#DIV/0!	#DIV/0!	#DIV/0!
																						#DIV/0!	#N/A	#N/A		#DIV/0!		5												#DIV/0!	#DIV/0!	#DIV/0!	#DIV/0!	#DIV/0!	#DIV/0!	#DIV/0!	#DIV/0!	#DIV/0!	#DIV/0!
																						#DIV/0!	#N/A	#N/A		#DIV/0!		5												#DIV/0!	#DIV/0!	#DIV/0!	#DIV/0!	#DIV/0!	#DIV/0!	#DIV/0!	#DIV/0!	#DIV/0!	#DIV/0!
																						#DIV/0!	#N/A	#N/A		#DIV/0!		5												#DIV/0!	#DIV/0!	#DIV/0!	#DIV/0!	#DIV/0!	#DIV/0!	#DIV/0!	#DIV/0!	#DIV/0!	#DIV/0!
																						#DIV/0!	#N/A	#N/A		#DIV/0!		5												#DIV/0!	#DIV/0!	#DIV/0!	#DIV/0!	#DIV/0!	#DIV/0!	#DIV/0!	#DIV/0!	#DIV/0!	#DIV/0!
																						#DIV/0!	#N/A	#N/A		#DIV/0!		5												#DIV/0!	#DIV/0!	#DIV/0!	#DIV/0!	#DIV/0!	#DIV/0!	#DIV/0!	#DIV/0!	#DIV/0!	#DIV/0!
																						#DIV/0!	#N/A	#N/A		#DIV/0!		5												#DIV/0!	#DIV/0!	#DIV/0!	#DIV/0!	#DIV/0!	#DIV/0!	#DIV/0!	#DIV/0!	#DIV/0!	#DIV/0!
																						#DIV/0!	#N/A	#N/A		#DIV/0!		5												#DIV/0!	#DIV/0!	#DIV/0!	#DIV/0!	#DIV/0!	#DIV/0!	#DIV/0!	#DIV/0!	#DIV/0!	#DIV/0!
																						#DIV/0!	#N/A	#N/A		#DIV/0!		5												#DIV/0!	#DIV/0!	#DIV/0!	#DIV/0!	#DIV/0!	#DIV/0!	#DIV/0!	#DIV/0!	#DIV/0!	#DIV/0!
																						0.326797	0.326797	0.323334		-0.00346348	-0.00346348	5												#DIV/0!	#DIV/0!	#DIV/0!	#DIV/0!	#DIV/0!	#DIV/0!	#DIV/0!	#DIV/0!	#DIV/0!	#DIV/0!
																						0.251193	0.251193	0.249942		-0.00125113	-0.00125113	5
																						0.143266	0.143266	0.148691		0.00542409	0.00542409	5												1/s	0	0.05	0.1	0.25	0	0	0	0	0
																						0.0834725	0.0834725	0.0887617		0.00528922	0.00528922	5											1	0.8	1.57222	1.89597	2.20943	3.09278	#N/A	#N/A	#N/A	#N/A	#N/A
																						0.0501002	0.0501002	0.0491458		-0.000954401	-0.000954401	5											2	1.6	1.83597	2.29692	2.74323	4.00093	#N/A	#N/A	#N/A	#N/A	#N/A
																						#DIV/0!	#N/A	#N/A		#DIV/0!		5											3	4	2.6272	3.49976	4.3446	6.72538	#N/A	#N/A	#N/A	#N/A	#N/A
																						#DIV/0!	#N/A	#N/A		#DIV/0!		5											4	8	3.94592	5.5045	7.01356	11.2661	#N/A	#N/A	#N/A	#N/A	#N/A
																						#DIV/0!	#N/A	#N/A		#DIV/0!		5											5	16	6.58335	9.51397	12.3515	20.3476	#N/A	#N/A	#N/A	#N/A	#N/A
																						#DIV/0!	#N/A	#N/A		#DIV/0!		5											6	#N/A	#N/A	#N/A	#N/A	#N/A	#N/A	#N/A	#N/A	#N/A	#N/A
																						#DIV/0!	#N/A	#N/A		#DIV/0!		5											7	#N/A	#N/A	#N/A	#N/A	#N/A	#N/A	#N/A	#N/A	#N/A	#N/A
																						#DIV/0!	#N/A	#N/A		#DIV/0!		5											8	#N/A	#N/A	#N/A	#N/A	#N/A	#N/A	#N/A	#N/A	#N/A	#N/A
																						#DIV/0!	#N/A	#N/A		#DIV/0!		5											9	#N/A	#N/A	#N/A	#N/A	#N/A	#N/A	#N/A	#N/A	#N/A	#N/A
																						#DIV/0!	#N/A	#N/A		#DIV/0!		5											10	#N/A	#N/A	#N/A	#N/A	#N/A	#N/A	#N/A	#N/A	#N/A	#N/A
																						#DIV/0!	#N/A	#N/A		#DIV/0!		5											11	#N/A	#N/A	#N/A	#N/A	#N/A	#N/A	#N/A	#N/A	#N/A	#N/A
																						#DIV/0!	#N/A	#N/A		#DIV/0!		5											12	#N/A	#N/A	#N/A	#N/A	#N/A	#N/A	#N/A	#N/A	#N/A	#N/A
																						#DIV/0!	#N/A	#N/A		#DIV/0!		5											13	#N/A	#N/A	#N/A	#N/A	#N/A	#N/A	#N/A	#N/A	#N/A	#N/A
																						#DIV/0!	#N/A	#N/A		#DIV/0!		5											14	#N/A	#N/A	#N/A	#N/A	#N/A	#N/A	#N/A	#N/A	#N/A	#N/A
																						#DIV/0!	#N/A	#N/A		#DIV/0!		5											15	#N/A	#N/A	#N/A	#N/A	#N/A	#N/A	#N/A	#N/A	#N/A	#N/A
																						#DIV/0!	#N/A	#N/A		#DIV/0!		5
																						#DIV/0!	#N/A	#N/A		#DIV/0!		5
																						#DIV/0!	#N/A	#N/A		#DIV/0!		5
																						#DIV/0!	#N/A	#N/A		#DIV/0!		5
																						#DIV/0!	#N/A	#N/A		#DIV/0!		5
																						#DIV/0!	#N/A	#N/A		#DIV/0!		5
																						#DIV/0!	#N/A	#N/A		#DIV/0!		5
																						#DIV/0!	#N/A	#N/A		#DIV/0!		5
																						#DIV/0!	#N/A	#N/A		#DIV/0!		5
																						#DIV/0!	#N/A	#N/A		#DIV/0!		5
																						#DIV/0!	#N/A	#N/A		#DIV/0!		5
																						#DIV/0!	#N/A	#N/A		#DIV/0!		5
																						#DIV/0!	#N/A	#N/A		#DIV/0!		5
																						#DIV/0!	#N/A	#N/A		#DIV/0!		5
																						#DIV/0!	#N/A	#N/A		#DIV/0!		5
																						#DIV/0!	#N/A	#N/A		#DIV/0!		5
																						#DIV/0!	#N/A	#N/A		#DIV/0!		5
																						#DIV/0!	#N/A	#N/A		#DIV/0!		5
																						#DIV/0!	#N/A	#N/A		#DIV/0!		5
																						#DIV/0!	#N/A	#N/A		#DIV/0!		5
																						#DIV/0!	#N/A	#N/A		#DIV/0!		5
																						#DIV/0!	#N/A	#N/A		#DIV/0!		5
																						#DIV/0!	#N/A	#N/A		#DIV/0!		5
																						#DIV/0!	#N/A	#N/A		#DIV/0!		5
																						#DIV/0!	#N/A	#N/A		#DIV/0!		5
																						#DIV/0!	#N/A	#N/A		#DIV/0!		5
																						#DIV/0!	#N/A	#N/A		#DIV/0!		5
																						#DIV/0!	#N/A	#N/A		#DIV/0!		5
																						#DIV/0!	#N/A	#N/A		#DIV/0!		5
																						#DIV/0!	#N/A	#N/A		#DIV/0!		5
																						#DIV/0!	#N/A	#N/A		#DIV/0!		5
																						#DIV/0!	#N/A	#N/A		#DIV/0!		5
																						#DIV/0!	#N/A	#N/A		#DIV/0!		5
																						#DIV/0!	#N/A	#N/A		#DIV/0!		5
																						#DIV/0!	#N/A	#N/A		#DIV/0!		5
																						#DIV/0!	#N/A	#N/A		#DIV/0!		5
																						#DIV/0!	#N/A	#N/A		#DIV/0!		5
																						#DIV/0!	#N/A	#N/A		#DIV/0!		5
																						#DIV/0!	#N/A	#N/A		#DIV/0!		5
																						#DIV/0!	#N/A	#N/A		#DIV/0!		5
																						#DIV/0!	#N/A	#N/A		#DIV/0!		5
																						#DIV/0!	#N/A	#N/A		#DIV/0!		5
																						#DIV/0!	#N/A	#N/A		#DIV/0!		5
																						#DIV/0!	#N/A	#N/A		#DIV/0!		5
																						#DIV/0!	#N/A	#N/A		#DIV/0!		5
																						#DIV/0!	#N/A	#N/A		#DIV/0!		5
																						#DIV/0!	#N/A	#N/A		#DIV/0!		5
																						#DIV/0!	#N/A	#N/A		#DIV/0!		5
																						#DIV/0!	#N/A	#N/A		#DIV/0!		5
																						#DIV/0!	#N/A	#N/A		#DIV/0!		5
																						#DIV/0!	#N/A	#N/A		#DIV/0!		5
																						#DIV/0!	#N/A	#N/A		#DIV/0!		5
																						#DIV/0!	#N/A	#N/A		#DIV/0!		5
																						#DIV/0!	#N/A	#N/A		#DIV/0!		5
																						#DIV/0!	#N/A	#N/A		#DIV/0!		5
																						#DIV/0!	#N/A	#N/A		#DIV/0!		5
																						#DIV/0!	#N/A	#N/A		#DIV/0!		5
																						#DIV/0!	#N/A	#N/A		#DIV/0!		5
																						#DIV/0!	#N/A	#N/A		#DIV/0!		5
																						#DIV/0!	#N/A	#N/A		#DIV/0!		5
																						#DIV/0!	#N/A	#N/A		#DIV/0!		5
																						#DIV/0!	#N/A	#N/A		#DIV/0!		5
																						#DIV/0!	#N/A	#N/A		#DIV/0!		5
																						#DIV/0!	#N/A	#N/A		#DIV/0!		5
																						#DIV/0!	#N/A	#N/A		#DIV/0!		5
																						#DIV/0!	#N/A	#N/A		#DIV/0!		5
																						#DIV/0!	#N/A	#N/A		#DIV/0!		5
																						#DIV/0!	#N/A	#N/A		#DIV/0!		5
																						#DIV/0!	#N/A	#N/A		#DIV/0!		5
																						#DIV/0!	#N/A	#N/A		#DIV/0!		5
																						#DIV/0!	#N/A	#N/A		#DIV/0!		5
																						#DIV/0!	#N/A	#N/A		#DIV/0!		5
																						#DIV/0!	#N/A	#N/A		#DIV/0!		5
																						#DIV/0!	#N/A	#N/A		#DIV/0!		5
																						#DIV/0!	#N/A	#N/A		#DIV/0!		5
																						#DIV/0!	#N/A	#N/A		#DIV/0!		5
																						#DIV/0!	#N/A	#N/A		#DIV/0!		5
																						#DIV/0!	#N/A	#N/A		#DIV/0!		5
																						#DIV/0!	#N/A	#N/A		#DIV/0!		5
																						#DIV/0!	#N/A	#N/A		#DIV/0!		5
																						#DIV/0!	#N/A	#N/A		#DIV/0!		5
																						#DIV/0!	#N/A	#N/A		#DIV/0!		5
																						#DIV/0!	#N/A	#N/A		#DIV/0!		5
																						#DIV/0!	#N/A	#N/A		#DIV/0!		5
																						#DIV/0!	#N/A	#N/A		#DIV/0!		5
																						#DIV/0!	#N/A	#N/A		#DIV/0!		5
																						#DIV/0!	#N/A	#N/A		#DIV/0!		5
																						#DIV/0!	#N/A	#N/A		#DIV/0!		5
																						#DIV/0!	#N/A	#N/A		#DIV/0!		5
																						#DIV/0!	#N/A	#N/A		#DIV/0!		5
																						#DIV/0!	#N/A	#N/A		#DIV/0!		5
																						#DIV/0!	#N/A	#N/A		#DIV/0!		5
																						#DIV/0!	#N/A	#N/A		#DIV/0!		5
																						#DIV/0!	#N/A	#N/A		#DIV/0!		5
																						#DIV/0!	#N/A	#N/A		#DIV/0!		5
																						#DIV/0!	#N/A	#N/A		#DIV/0!		5
																						#DIV/0!	#N/A	#N/A		#DIV/0!		5
																						#DIV/0!	#N/A	#N/A		#DIV/0!		5
																						#DIV/0!	#N/A	#N/A		#DIV/0!		5
																						#DIV/0!	#N/A	#N/A		#DIV/0!		5
																						#DIV/0!	#N/A	#N/A		#DIV/0!		5
																						#DIV/0!	#N/A	#N/A		#DIV/0!		5
																						#DIV/0!	#N/A	#N/A		#DIV/0!		5
																						#DIV/0!	#N/A	#N/A		#DIV/0!		5
																						#DIV/0!	#N/A	#N/A		#DIV/0!		5
																						#DIV/0!	#N/A	#N/A		#DIV/0!		5
																						#DIV/0!	#N/A	#N/A		#DIV/0!		5
																						#DIV/0!	#N/A	#N/A		#DIV/0!		5
																						#DIV/0!	#N/A	#N/A		#DIV/0!		5
																						#DIV/0!	#N/A	#N/A		#DIV/0!		5
																						#DIV/0!	#N/A	#N/A		#DIV/0!		5
																						#DIV/0!	#N/A	#N/A		#DIV/0!		5
																						#DIV/0!	#N/A	#N/A		#DIV/0!		5
																						#DIV/0!	#N/A	#N/A		#DIV/0!		5
																						#DIV/0!	#N/A	#N/A		#DIV/0!		5
																						#DIV/0!	#N/A	#N/A		#DIV/0!		5
																						#DIV/0!	#N/A	#N/A		#DIV/0!		5
																						#DIV/0!	#N/A	#N/A		#DIV/0!		5
																						#DIV/0!	#N/A	#N/A		#DIV/0!		5
																						#DIV/0!	#N/A	#N/A		#DIV/0!		5
																						#DIV/0!	#N/A	#N/A		#DIV/0!		5
																						#DIV/0!	#N/A	#N/A		#DIV/0!		5
																						#DIV/0!	#N/A	#N/A		#DIV/0!		5
																						#DIV/0!	#N/A	#N/A		#DIV/0!		5
																						#DIV/0!	#N/A	#N/A		#DIV/0!		5
																						#DIV/0!	#N/A	#N/A		#DIV/0!		5
																						#DIV/0!	#N/A	#N/A		#DIV/0!		5
																						#DIV/0!	#N/A	#N/A		#DIV/0!		5
																						#DIV/0!	#N/A	#N/A		#DIV/0!		5
																						#DIV/0!	#N/A	#N/A		#DIV/0!		5
																						#DIV/0!	#N/A	#N/A		#DIV/0!		5
																						#DIV/0!	#N/A	#N/A		#DIV/0!		5
																						#DIV/0!	#N/A	#N/A		#DIV/0!		5
																						#DIV/0!	#N/A	#N/A		#DIV/0!		5
																						#DIV/0!	#N/A	#N/A		#DIV/0!		5
																						#DIV/0!	#N/A	#N/A		#DIV/0!		5
																						#DIV/0!	#N/A	#N/A		#DIV/0!		5
																						#DIV/0!	#N/A	#N/A		#DIV/0!		5
																						#DIV/0!	#N/A	#N/A		#DIV/0!		5
																						#DIV/0!	#N/A	#N/A		#DIV/0!		5
																						#DIV/0!	#N/A	#N/A		#DIV/0!		5
																						#DIV/0!	#N/A	#N/A		#DIV/0!		5
																						#DIV/0!	#N/A	#N/A		#DIV/0!		5
																						#DIV/0!	#N/A	#N/A		#DIV/0!		5
																						#DIV/0!	#N/A	#N/A		#DIV/0!		5
																						#DIV/0!	#N/A	#N/A		#DIV/0!		5
																						#DIV/0!	#N/A	#N/A		#DIV/0!		5
																						#DIV/0!	#N/A	#N/A		#DIV/0!		5
																						#DIV/0!	#N/A	#N/A		#DIV/0!		5
																						#DIV/0!	#N/A	#N/A		#DIV/0!		5
																						#DIV/0!	#N/A	#N/A		#DIV/0!		5
																						#DIV/0!	#N/A	#N/A		#DIV/0!		5
																						#DIV/0!	#N/A	#N/A		#DIV/0!		5
																						#DIV/0!	#N/A	#N/A		#DIV/0!		5
																						#DIV/0!	#N/A	#N/A		#DIV/0!		5
																						#DIV/0!	#N/A	#N/A		#DIV/0!		5
																						#DIV/0!	#N/A	#N/A		#DIV/0!		5
																						#DIV/0!	#N/A	#N/A		#DIV/0!		5
																						#DIV/0!	#N/A	#N/A		#DIV/0!		5
																						#DIV/0!	#N/A	#N/A		#DIV/0!		5
																						#DIV/0!	#N/A	#N/A		#DIV/0!		5
																						#DIV/0!	#N/A	#N/A		#DIV/0!		5
																						#DIV/0!	#N/A	#N/A		#DIV/0!		5
																						#DIV/0!	#N/A	#N/A		#DIV/0!		5
																						#DIV/0!	#N/A	#N/A		#DIV/0!		5
																						#DIV/0!	#N/A	#N/A		#DIV/0!		5
																						#DIV/0!	#N/A	#N/A		#DIV/0!		5
																						#DIV/0!	#N/A	#N/A		#DIV/0!		5
																						#DIV/0!	#N/A	#N/A		#DIV/0!		5
																						#DIV/0!	#N/A	#N/A		#DIV/0!		5
																						#DIV/0!	#N/A	#N/A		#DIV/0!		5
																						#DIV/0!	#N/A	#N/A		#DIV/0!		5
																						#DIV/0!	#N/A	#N/A		#DIV/0!		5
																						#DIV/0!	#N/A	#N/A		#DIV/0!		5
																						#DIV/0!	#N/A	#N/A		#DIV/0!		5
																						#DIV/0!	#N/A	#N/A		#DIV/0!		5
																						#DIV/0!	#N/A	#N/A		#DIV/0!		5
[truncated: 54 more columns]
