# Supplementary material for: Comparing enzyme activity modifier equations through the development of global data fitting templates in Excel
Source: PeerJ. 2018 Dec 14;6:e6082. doi: 10.7717/peerj.6082 (PMC6296338; doi:10.7717/peerj.6082)
Supplement: Supplemental Information 10 [file peerj-06-6082-s010.xlsx]

## Sheet: Raw data and fitting summary
		No Inhibitor	[I]1	[I]2	[I]3	[I]4	[I]5	[I]6	[I]7	[I]8	[I]9	[I]10	[I]11	[I]12	[I]13	[I]14	[I]15
		0	5	10	15	20	25
[S]1	1.5	0.31	0.28	0.26	0.25	0.23	0.22
[S]2	2	0.37	0.33	0.31	0.29	0.28	0.27
[S]3	3	0.45	0.41	0.38	0.36	0.34	0.33
[S]4	4	0.51	0.47	0.43	0.41	0.39	0.37
[S]5
[S]6
[S]7
[S]8
[S]9
[S]10
[S]11
[S]12
[S]13
[S]14
[S]15
		Direct linear plot Km, Vmax estimates
							44.4672	1.5	0.310006	1	1	1.5	0.310006	1.5	0.310006
		Km	2.49838				48.3209	2	0.367398	1	1	2	0.367398	2	0.367398
		Vmax	0.826347					3	0.450867	1	1	3	0.450867	3	0.450867
								4	0.508648	1	1	4	0.508648	4	0.508648
	Ki estimate based on linear decrease in activity							0	0	#DIV/0!	#DIV/0!	#DIV/0!	#DIV/0!	#N/A	#N/A
								0	0	#DIV/0!	#DIV/0!	#DIV/0!	#DIV/0!	#N/A	#N/A
		Ki	44.4672					0	0	#DIV/0!	#DIV/0!	#DIV/0!	#DIV/0!	#N/A	#N/A
								0	0	#DIV/0!	#DIV/0!	#DIV/0!	#DIV/0!	#N/A	#N/A
								0	0	#DIV/0!	#DIV/0!	#DIV/0!	#DIV/0!	#N/A	#N/A
								0	0	#DIV/0!	#DIV/0!	#DIV/0!	#DIV/0!	#N/A	#N/A
								0	0	#DIV/0!	#DIV/0!	#DIV/0!	#DIV/0!	#N/A	#N/A
								0	0	#DIV/0!	#DIV/0!	#DIV/0!	#DIV/0!	#N/A	#N/A
								0	0	#DIV/0!	#DIV/0!	#DIV/0!	#DIV/0!	#N/A	#N/A
								0	0	#DIV/0!	#DIV/0!	#DIV/0!	#DIV/0!	#N/A	#N/A
								0	0	#DIV/0!	#DIV/0!	#DIV/0!	#DIV/0!	#N/A	#N/A
			Km	Km2	Vmax	Vmax2	Ki	aKi	RSS	RSE	n	k	BIC
		Non-competitive	2.62583		0.837255		65.2504		0.000554137	0.00513688	24	3	-107.138
		Competitive	1.99651		0.736988		27.9223		0.00148735	0.00841582	24	3	-96.8465
		Uncompetitive	3.4186		0.954733		30.4148		0.00164403	0.008848	24	3	-95.8026
		Mixed Non-competitive	2.5722		0.829003		60.2416	70.6113	0.000549142	0.00523995	24	4	-105.852
		Modifier equation	2.56258	2.8191	0.837812	0.393778	26.7459		0.000155472	0.00286055	24	5	-117.624
													Residual distribution
													Non-competitive	Competitive	Uncompetitive	Mixed Non-competitive	Modifier equation
												Minimum value	-0.00828311	-0.018389	-0.0188401	-0.00880443	-0.00512526
												First quartile	-0.00378543	-0.00641192	-0.003458	-0.0037135	-0.00180063
												Median value	0.000524086	0.00266656	0.00275294	0.00028914	0.000455426
					Non-competitive	Competitive	Uncompetitive	Mixed Non-competitive	Modifier equation			Third quartile	0.00390055	0.00686558	0.00466412	0.00388497	0.00201445
				Q1	-0.00378543	-0.00641192	-0.003458	-0.0037135	-0.00180063			Maximum value	0.00827989	0.00923651	0.0128029	0.00829751	0.00364271
				Min	-0.00828311	-0.018389	-0.0188401	-0.00880443	-0.00512526
				Median	0.000524086	0.00266656	0.00275294	0.00028914	0.000455426
				Max	0.00827989	0.00923651	0.0128029	0.00829751	0.00364271
				Q3	0.00390055	0.00686558	0.00466412	0.00388497	0.00201445
	Non-competitive
	Km	2.62583
	Vmax	0.837255
	Ki	65.2504
	RSS	0.000554137
	Competitive
	Km	1.99651
	Vmax	0.736988
	Ki	27.9223
	RSS	0.00148735
	Uncompetitive
	Km	3.4186
	Vmax	0.954733
	Ki	30.4148
	RSS	0.00164403
	Mixed Non-competitive
	Km	2.5722
	Vmax	0.829003
	Ki	60.2416
	aKi	70.6113
	RSS	0.000549142
	Modifier equation
	Km	2.56258
	Km2	2.8191
	Vmax	0.837812
	Vmax2	0.393778
	Ki	26.7459
	RSS	0.000155472

## Sheet: modified direct linear plot
Km/Vmax direct plot
									Intercept points x-axis																				Intercept points x-axis
										Line 1	Line 2	Line 3	Line 4	Line 5	Line 6	Line 7	Line 8	Line 9	Line 10	Line 11	Line 12	Line 13	Line 14	Line 15						Line 1	Line 2	Line 3	Line 4	Line 5	Line 6	Line 7	Line 8	Line 9	Line 10	Line 11	Line 12	Line 13	Line 14	Line 15
			x-intercept	y-interecept					Line 1																				Line 1
[Substrate]		v	[Substrate]/v	1/v					Line 2	3.13862																			Line 2	3.13862
1.5		0.31	4.83871	3.22581					Line 3	3.01075	2.88288																		Line 3	3.01075	2.88288
2		0.37	5.40541	2.7027					Line 4	3.03605	2.96767	3.13725																	Line 4	3.03605	2.96767	3.13725
3		0.45	6.66667	2.22222					Line 5	#DIV/0!	#DIV/0!	#DIV/0!	#DIV/0!																Line 5
4		0.51	7.84314	1.96078					Line 6	#DIV/0!	#DIV/0!	#DIV/0!	#DIV/0!	#DIV/0!															Line 6
0		0	#DIV/0!	#DIV/0!					Line 7	#DIV/0!	#DIV/0!	#DIV/0!	#DIV/0!	#DIV/0!	#DIV/0!														Line 7
0		0	#DIV/0!	#DIV/0!					Line 8	#DIV/0!	#DIV/0!	#DIV/0!	#DIV/0!	#DIV/0!	#DIV/0!	#DIV/0!													Line 8
0		0	#DIV/0!	#DIV/0!					Line 9	#DIV/0!	#DIV/0!	#DIV/0!	#DIV/0!	#DIV/0!	#DIV/0!	#DIV/0!	#DIV/0!												Line 9
0		0	#DIV/0!	#DIV/0!					Line 10	#DIV/0!	#DIV/0!	#DIV/0!	#DIV/0!	#DIV/0!	#DIV/0!	#DIV/0!	#DIV/0!	#DIV/0!											Line 10
0		0	#DIV/0!	#DIV/0!					Line 11	#DIV/0!	#DIV/0!	#DIV/0!	#DIV/0!	#DIV/0!	#DIV/0!	#DIV/0!	#DIV/0!	#DIV/0!	#DIV/0!										Line 11
0		0	#DIV/0!	#DIV/0!					Line 12	#DIV/0!	#DIV/0!	#DIV/0!	#DIV/0!	#DIV/0!	#DIV/0!	#DIV/0!	#DIV/0!	#DIV/0!	#DIV/0!	#DIV/0!									Line 12
0		0	#DIV/0!	#DIV/0!					Line 13	#DIV/0!	#DIV/0!	#DIV/0!	#DIV/0!	#DIV/0!	#DIV/0!	#DIV/0!	#DIV/0!	#DIV/0!	#DIV/0!	#DIV/0!	#DIV/0!								Line 13
0		0	#DIV/0!	#DIV/0!					Line 14	#DIV/0!	#DIV/0!	#DIV/0!	#DIV/0!	#DIV/0!	#DIV/0!	#DIV/0!	#DIV/0!	#DIV/0!	#DIV/0!	#DIV/0!	#DIV/0!	#DIV/0!							Line 14
0		0	#DIV/0!	#DIV/0!					Line 15	#DIV/0!	#DIV/0!	#DIV/0!	#DIV/0!	#DIV/0!	#DIV/0!	#DIV/0!	#DIV/0!	#DIV/0!	#DIV/0!	#DIV/0!	#DIV/0!	#DIV/0!	#DIV/0!						Line 15
0		0	#DIV/0!	#DIV/0!
0		0	#DIV/0!	#DIV/0!
																														Km/Vmax (x-axis):	3.0234		Km:	2.49838
																														Standard dev:	0.099227
Line 1	x	y
	0	3.22581		Slope:	-0.666667
	4.83871	0		y-intercept:	3.22581				1/Intercept points y-axis																				1/Intercept points y-axis
										Line 1	Line 2	Line 3	Line 4	Line 5	Line 6	Line 7	Line 8	Line 9	Line 10	Line 11	Line 12	Line 13	Line 14	Line 15						Line 1	Line 2	Line 3	Line 4	Line 5	Line 6	Line 7	Line 8	Line 9	Line 10	Line 11	Line 12	Line 13	Line 14	Line 15
Line 2	x	y							Line 1																				Line 1
	0	2.7027		Slope:	-0.5				Line 2	0.882308																			Line 2	0.882308
	5.40541	0		y-intercept:	2.7027				Line 3	0.820588	0.792857																		Line 3	0.820588	0.792857
									Line 4	0.832105	0.820435	0.85																	Line 4	0.832105	0.820435	0.85
Line 3	x	y							Line 5	#DIV/0!	#DIV/0!	#DIV/0!	#DIV/0!																Line 5
	0	2.22222		Slope:	-0.333333				Line 6	#DIV/0!	#DIV/0!	#DIV/0!	#DIV/0!	#DIV/0!															Line 6
	6.66667	0		y-intercept:	2.22222				Line 7	#DIV/0!	#DIV/0!	#DIV/0!	#DIV/0!	#DIV/0!	#DIV/0!														Line 7
									Line 8	#DIV/0!	#DIV/0!	#DIV/0!	#DIV/0!	#DIV/0!	#DIV/0!	#DIV/0!													Line 8
Line 4	x	y							Line 9	#DIV/0!	#DIV/0!	#DIV/0!	#DIV/0!	#DIV/0!	#DIV/0!	#DIV/0!	#DIV/0!												Line 9
	0	1.96078		Slope:	-0.25				Line 10	#DIV/0!	#DIV/0!	#DIV/0!	#DIV/0!	#DIV/0!	#DIV/0!	#DIV/0!	#DIV/0!	#DIV/0!											Line 10
	7.84314	0		y-intercept:	1.96078				Line 11	#DIV/0!	#DIV/0!	#DIV/0!	#DIV/0!	#DIV/0!	#DIV/0!	#DIV/0!	#DIV/0!	#DIV/0!	#DIV/0!										Line 11
									Line 12	#DIV/0!	#DIV/0!	#DIV/0!	#DIV/0!	#DIV/0!	#DIV/0!	#DIV/0!	#DIV/0!	#DIV/0!	#DIV/0!	#DIV/0!									Line 12
Line 5	x	y							Line 13	#DIV/0!	#DIV/0!	#DIV/0!	#DIV/0!	#DIV/0!	#DIV/0!	#DIV/0!	#DIV/0!	#DIV/0!	#DIV/0!	#DIV/0!	#DIV/0!								Line 13
	0	#DIV/0!		Slope:	#VALUE!				Line 14	#DIV/0!	#DIV/0!	#DIV/0!	#DIV/0!	#DIV/0!	#DIV/0!	#DIV/0!	#DIV/0!	#DIV/0!	#DIV/0!	#DIV/0!	#DIV/0!	#DIV/0!							Line 14
	#DIV/0!	0		y-intercept:	#DIV/0!				Line 15	#DIV/0!	#DIV/0!	#DIV/0!	#DIV/0!	#DIV/0!	#DIV/0!	#DIV/0!	#DIV/0!	#DIV/0!	#DIV/0!	#DIV/0!	#DIV/0!	#DIV/0!	#DIV/0!						Line 15
Line 6	x	y
	0	#DIV/0!		Slope:	#VALUE!
	#DIV/0!	0		y-intercept:	#DIV/0!
Line 7	x	y																												Vmax:	0.826347
	0	#DIV/0!		Slope:	#VALUE!																									Standard dev:	0.0304776
	#DIV/0!	0		y-intercept:	#DIV/0!
Line 8	x	y
	0	#DIV/0!		Slope:	#VALUE!
	#DIV/0!	0		y-intercept:	#DIV/0!
Line 9	x	y
	0	#DIV/0!		Slope:	#VALUE!
	#DIV/0!	0		y-intercept:	#DIV/0!
Line 10	x	y
	0	#DIV/0!		Slope:	#VALUE!
	#DIV/0!	0		y-intercept:	#DIV/0!
Line 11	x	y										0	3.22581	2.7027	2.22222	1.96078	#DIV/0!	#DIV/0!	#DIV/0!	#DIV/0!	#DIV/0!	#DIV/0!	#DIV/0!	#DIV/0!	#DIV/0!	#DIV/0!	#DIV/0!	0	0	0	0
	0	#DIV/0!		Slope:	#VALUE!							4.83871	0
	#DIV/0!	0		y-intercept:	#DIV/0!							5.40541		0
												6.66667			0
Line 12	x	y										7.84314				0
	0	#DIV/0!		Slope:	#VALUE!							#DIV/0!					0
	#DIV/0!	0		y-intercept:	#DIV/0!							#DIV/0!						0
												#DIV/0!							0
Line 13	x	y										#DIV/0!								0
	0	#DIV/0!		Slope:	#VALUE!							#DIV/0!									0
	#DIV/0!	0		y-intercept:	#DIV/0!							#DIV/0!										0
												#DIV/0!											0
Line 14	x	y										#DIV/0!												0
	0	#DIV/0!		Slope:	#VALUE!							#DIV/0!													0
	#DIV/0!	0		y-intercept:	#DIV/0!							#DIV/0!														0
												#DIV/0!															0
Line 15	x	y										0																0
	0	#DIV/0!		Slope:	#VALUE!							0																	0
	#DIV/0!	0		y-intercept:	#DIV/0!							0																		0
												0																			0

## Sheet: Non-competitive
																							Calculated values
		No Inhibitor	[I]1	[I]2	[I]3	[I]4	[I]5	[I]6	[I]7	[I]8	[I]9	[I]10	[I]11	[I]12	[I]13	[I]14	[I]15						No Inhibitor	[I]1	[I]2	[I]3	[I]4	[I]5	[I]6	[I]7	[I]8	[I]9	[I]10	[I]11	[I]12	[I]13	[I]14	[I]15
		0	5	10	15	20	25	0	0	0	0	0	0	0	0	0	0		Km	Vmax	Ki		0	5	10	15	20	25	0	0	0	0	0	0	0	0	0	0
[S]1	1.5	0.31	0.28	0.26	0.25	0.23	0.22	0	0	0	0	0	0	0	0	0	0		2.62583	0.837255	65.2504		0.304395	0.28273	0.263944	0.247499	0.232983	0.220075	#DIV/0!	#DIV/0!	#DIV/0!	#DIV/0!	#DIV/0!	#DIV/0!	#DIV/0!	#DIV/0!	#DIV/0!	#DIV/0!		0.304395	0.28273	0.263944	0.247499	0.232983	0.220075	0	0	0	0
[S]2	2	0.37	0.33	0.31	0.29	0.28	0.27	0	0	0	0	0	0	0	0	0	0						0.361991	0.336227	0.313886	0.294329	0.277067	0.261717	#DIV/0!	#DIV/0!	#DIV/0!	#DIV/0!	#DIV/0!	#DIV/0!	#DIV/0!	#DIV/0!	#DIV/0!	#DIV/0!		0.361991	0.336227	0.313886	0.294329	0.277067	0.261717	0	0	0	0
[S]3	3	0.45	0.41	0.38	0.36	0.34	0.33	0	0	0	0	0	0	0	0	0	0						0.44647	0.414693	0.387139	0.363018	0.341727	0.322794	#DIV/0!	#DIV/0!	#DIV/0!	#DIV/0!	#DIV/0!	#DIV/0!	#DIV/0!	#DIV/0!	#DIV/0!	#DIV/0!		0.44647	0.414693	0.387139	0.363018	0.341727	0.322794	0	0	0	0
[S]4	4	0.51	0.47	0.43	0.41	0.39	0.37	0	0	0	0	0	0	0	0	0	0						0.505449	0.469474	0.43828	0.410973	0.386869	0.365436	#DIV/0!	#DIV/0!	#DIV/0!	#DIV/0!	#DIV/0!	#DIV/0!	#DIV/0!	#DIV/0!	#DIV/0!	#DIV/0!		0.505449	0.469474	0.43828	0.410973	0.386869	0.365436	0	0	0	0
[S]5	0	0	0	0	0	0	0	0	0	0	0	0	0	0	0	0	0						#DIV/0!	#DIV/0!	#DIV/0!	#DIV/0!	#DIV/0!	#DIV/0!	#DIV/0!	#DIV/0!	#DIV/0!	#DIV/0!	#DIV/0!	#DIV/0!	#DIV/0!	#DIV/0!	#DIV/0!	#DIV/0!		0	0	0	0	0	0	0	0	0	0
[S]6	0	0	0	0	0	0	0	0	0	0	0	0	0	0	0	0	0			Sum R2	0.000554137		#DIV/0!	#DIV/0!	#DIV/0!	#DIV/0!	#DIV/0!	#DIV/0!	#DIV/0!	#DIV/0!	#DIV/0!	#DIV/0!	#DIV/0!	#DIV/0!	#DIV/0!	#DIV/0!	#DIV/0!	#DIV/0!		0	0	0	0	0	0	0	0	0	0
[S]7	0	0	0	0	0	0	0	0	0	0	0	0	0	0	0	0	0			Sum residuals %	0.30155		#DIV/0!	#DIV/0!	#DIV/0!	#DIV/0!	#DIV/0!	#DIV/0!	#DIV/0!	#DIV/0!	#DIV/0!	#DIV/0!	#DIV/0!	#DIV/0!	#DIV/0!	#DIV/0!	#DIV/0!	#DIV/0!		0	0	0	0	0	0	0	0	0	0
[S]8	0	0	0	0	0	0	0	0	0	0	0	0	0	0	0	0	0						#DIV/0!	#DIV/0!	#DIV/0!	#DIV/0!	#DIV/0!	#DIV/0!	#DIV/0!	#DIV/0!	#DIV/0!	#DIV/0!	#DIV/0!	#DIV/0!	#DIV/0!	#DIV/0!	#DIV/0!	#DIV/0!		0	0	0	0	0	0	0	0	0	0
[S]9	0	0	0	0	0	0	0	0	0	0	0	0	0	0	0	0	0						#DIV/0!	#DIV/0!	#DIV/0!	#DIV/0!	#DIV/0!	#DIV/0!	#DIV/0!	#DIV/0!	#DIV/0!	#DIV/0!	#DIV/0!	#DIV/0!	#DIV/0!	#DIV/0!	#DIV/0!	#DIV/0!		0	0	0	0	0	0	0	0	0	0
[S]10	0	0	0	0	0	0	0	0	0	0	0	0	0	0	0	0	0						#DIV/0!	#DIV/0!	#DIV/0!	#DIV/0!	#DIV/0!	#DIV/0!	#DIV/0!	#DIV/0!	#DIV/0!	#DIV/0!	#DIV/0!	#DIV/0!	#DIV/0!	#DIV/0!	#DIV/0!	#DIV/0!		0	0	0	0	0	0	0	0	0	0
[S]11	0	0	0	0	0	0	0	0	0	0	0	0	0	0	0	0	0						#DIV/0!	#DIV/0!	#DIV/0!	#DIV/0!	#DIV/0!	#DIV/0!	#DIV/0!	#DIV/0!	#DIV/0!	#DIV/0!	#DIV/0!	#DIV/0!	#DIV/0!	#DIV/0!	#DIV/0!	#DIV/0!		0	0	0	0	0	0	0	0	0	0
[S]12	0	0	0	0	0	0	0	0	0	0	0	0	0	0	0	0	0						#DIV/0!	#DIV/0!	#DIV/0!	#DIV/0!	#DIV/0!	#DIV/0!	#DIV/0!	#DIV/0!	#DIV/0!	#DIV/0!	#DIV/0!	#DIV/0!	#DIV/0!	#DIV/0!	#DIV/0!	#DIV/0!		0	0	0	0	0	0	0	0	0	0
[S]13	0	0	0	0	0	0	0	0	0	0	0	0	0	0	0	0	0						#DIV/0!	#DIV/0!	#DIV/0!	#DIV/0!	#DIV/0!	#DIV/0!	#DIV/0!	#DIV/0!	#DIV/0!	#DIV/0!	#DIV/0!	#DIV/0!	#DIV/0!	#DIV/0!	#DIV/0!	#DIV/0!		0	0	0	0	0	0	0	0	0	0
[S]14	0	0	0	0	0	0	0	0	0	0	0	0	0	0	0	0	0						#DIV/0!	#DIV/0!	#DIV/0!	#DIV/0!	#DIV/0!	#DIV/0!	#DIV/0!	#DIV/0!	#DIV/0!	#DIV/0!	#DIV/0!	#DIV/0!	#DIV/0!	#DIV/0!	#DIV/0!	#DIV/0!		0	0	0	0	0	0	0	0	0	0
[S]15	0	0	0	0	0	0	0	0	0	0	0	0	0	0	0	0	0						#DIV/0!	#DIV/0!	#DIV/0!	#DIV/0!	#DIV/0!	#DIV/0!	#DIV/0!	#DIV/0!	#DIV/0!	#DIV/0!	#DIV/0!	#DIV/0!	#DIV/0!	#DIV/0!	#DIV/0!	#DIV/0!		0	0	0	0	0	0	0	0	0	0
	1	1	1	1	1	1	1	#DIV/0!	#DIV/0!	#DIV/0!	#DIV/0!	#DIV/0!	#DIV/0!	#DIV/0!	#DIV/0!	#DIV/0!	#DIV/0!																					1.5	1.5	0.304395	0.28273	0.263944	0.247499	0.232983	0.220075	#N/A	#N/A	#N/A	#N/A
	1	1	1	1	1	1	1	#DIV/0!	#DIV/0!	#DIV/0!	#DIV/0!	#DIV/0!	#DIV/0!	#DIV/0!	#DIV/0!	#DIV/0!	#DIV/0!					0.31	0.31	0.304395		-0.00560515	-0.00560515	1										2	2	0.361991	0.336227	0.313886	0.294329	0.277067	0.261717	#N/A	#N/A	#N/A	#N/A
	1	1	1	1	1	1	1	#DIV/0!	#DIV/0!	#DIV/0!	#DIV/0!	#DIV/0!	#DIV/0!	#DIV/0!	#DIV/0!	#DIV/0!	#DIV/0!					0.37	0.37	0.361991		-0.00800903	-0.00800903	1										3	3	0.44647	0.414693	0.387139	0.363018	0.341727	0.322794	#N/A	#N/A	#N/A	#N/A
	1	1	1	1	1	1	1	#DIV/0!	#DIV/0!	#DIV/0!	#DIV/0!	#DIV/0!	#DIV/0!	#DIV/0!	#DIV/0!	#DIV/0!	#DIV/0!					0.45	0.45	0.44647		-0.00353018	-0.00353018	1										4	4	0.505449	0.469474	0.43828	0.410973	0.386869	0.365436	#N/A	#N/A	#N/A	#N/A
	#DIV/0!	#DIV/0!	#DIV/0!	#DIV/0!	#DIV/0!	#DIV/0!	#DIV/0!	#DIV/0!	#DIV/0!	#DIV/0!	#DIV/0!	#DIV/0!	#DIV/0!	#DIV/0!	#DIV/0!	#DIV/0!	#DIV/0!					0.51	0.51	0.505449		-0.00455118	-0.00455118	1										#DIV/0!	#N/A	#N/A	#N/A	#N/A	#N/A	#N/A	#N/A	#N/A	#N/A	#N/A	#N/A
	#DIV/0!	#DIV/0!	#DIV/0!	#DIV/0!	#DIV/0!	#DIV/0!	#DIV/0!	#DIV/0!	#DIV/0!	#DIV/0!	#DIV/0!	#DIV/0!	#DIV/0!	#DIV/0!	#DIV/0!	#DIV/0!	#DIV/0!					#DIV/0!	#N/A	#N/A		#DIV/0!		1										#DIV/0!	#N/A	#N/A	#N/A	#N/A	#N/A	#N/A	#N/A	#N/A	#N/A	#N/A	#N/A
	#DIV/0!	#DIV/0!	#DIV/0!	#DIV/0!	#DIV/0!	#DIV/0!	#DIV/0!	#DIV/0!	#DIV/0!	#DIV/0!	#DIV/0!	#DIV/0!	#DIV/0!	#DIV/0!	#DIV/0!	#DIV/0!	#DIV/0!					#DIV/0!	#N/A	#N/A		#DIV/0!		1										#DIV/0!	#N/A	#N/A	#N/A	#N/A	#N/A	#N/A	#N/A	#N/A	#N/A	#N/A	#N/A
	#DIV/0!	#DIV/0!	#DIV/0!	#DIV/0!	#DIV/0!	#DIV/0!	#DIV/0!	#DIV/0!	#DIV/0!	#DIV/0!	#DIV/0!	#DIV/0!	#DIV/0!	#DIV/0!	#DIV/0!	#DIV/0!	#DIV/0!					#DIV/0!	#N/A	#N/A		#DIV/0!		1										#DIV/0!	#N/A	#N/A	#N/A	#N/A	#N/A	#N/A	#N/A	#N/A	#N/A	#N/A	#N/A
	#DIV/0!	#DIV/0!	#DIV/0!	#DIV/0!	#DIV/0!	#DIV/0!	#DIV/0!	#DIV/0!	#DIV/0!	#DIV/0!	#DIV/0!	#DIV/0!	#DIV/0!	#DIV/0!	#DIV/0!	#DIV/0!	#DIV/0!					#DIV/0!	#N/A	#N/A		#DIV/0!		1										#DIV/0!	#N/A	#N/A	#N/A	#N/A	#N/A	#N/A	#N/A	#N/A	#N/A	#N/A	#N/A
	#DIV/0!	#DIV/0!	#DIV/0!	#DIV/0!	#DIV/0!	#DIV/0!	#DIV/0!	#DIV/0!	#DIV/0!	#DIV/0!	#DIV/0!	#DIV/0!	#DIV/0!	#DIV/0!	#DIV/0!	#DIV/0!	#DIV/0!					#DIV/0!	#N/A	#N/A		#DIV/0!		1										#DIV/0!	#N/A	#N/A	#N/A	#N/A	#N/A	#N/A	#N/A	#N/A	#N/A	#N/A	#N/A
	#DIV/0!	#DIV/0!	#DIV/0!	#DIV/0!	#DIV/0!	#DIV/0!	#DIV/0!	#DIV/0!	#DIV/0!	#DIV/0!	#DIV/0!	#DIV/0!	#DIV/0!	#DIV/0!	#DIV/0!	#DIV/0!	#DIV/0!					#DIV/0!	#N/A	#N/A		#DIV/0!		1										#DIV/0!	#N/A	#N/A	#N/A	#N/A	#N/A	#N/A	#N/A	#N/A	#N/A	#N/A	#N/A
	#DIV/0!	#DIV/0!	#DIV/0!	#DIV/0!	#DIV/0!	#DIV/0!	#DIV/0!	#DIV/0!	#DIV/0!	#DIV/0!	#DIV/0!	#DIV/0!	#DIV/0!	#DIV/0!	#DIV/0!	#DIV/0!	#DIV/0!					#DIV/0!	#N/A	#N/A		#DIV/0!		1										#DIV/0!	#N/A	#N/A	#N/A	#N/A	#N/A	#N/A	#N/A	#N/A	#N/A	#N/A	#N/A
	#DIV/0!	#DIV/0!	#DIV/0!	#DIV/0!	#DIV/0!	#DIV/0!	#DIV/0!	#DIV/0!	#DIV/0!	#DIV/0!	#DIV/0!	#DIV/0!	#DIV/0!	#DIV/0!	#DIV/0!	#DIV/0!	#DIV/0!					#DIV/0!	#N/A	#N/A		#DIV/0!		1										#DIV/0!	#N/A	#N/A	#N/A	#N/A	#N/A	#N/A	#N/A	#N/A	#N/A	#N/A	#N/A
	#DIV/0!	#DIV/0!	#DIV/0!	#DIV/0!	#DIV/0!	#DIV/0!	#DIV/0!	#DIV/0!	#DIV/0!	#DIV/0!	#DIV/0!	#DIV/0!	#DIV/0!	#DIV/0!	#DIV/0!	#DIV/0!	#DIV/0!					#DIV/0!	#N/A	#N/A		#DIV/0!		1										#DIV/0!	#N/A	#N/A	#N/A	#N/A	#N/A	#N/A	#N/A	#N/A	#N/A	#N/A	#N/A
	#DIV/0!	#DIV/0!	#DIV/0!	#DIV/0!	#DIV/0!	#DIV/0!	#DIV/0!	#DIV/0!	#DIV/0!	#DIV/0!	#DIV/0!	#DIV/0!	#DIV/0!	#DIV/0!	#DIV/0!	#DIV/0!	#DIV/0!					#DIV/0!	#N/A	#N/A		#DIV/0!		1										#DIV/0!	#N/A	#N/A	#N/A	#N/A	#N/A	#N/A	#N/A	#N/A	#N/A	#N/A	#N/A
																						#DIV/0!	#N/A	#N/A		#DIV/0!		1
		1	1	1	1	1	1	0	0	0	0	0	0	0	0	0	0					0.28	0.28	0.28273		0.00272986	0.00272986	1											0.666667	3.28521	3.53695	3.78868	4.04042	4.29216	4.5439	#N/A	#N/A	#N/A	#N/A
		1	1	1	1	1	1	0	0	0	0	0	0	0	0	0	0					0.33	0.33	0.336227		0.00622663	0.00622663	1											0.5	2.7625	2.97418	3.18587	3.39755	3.60924	3.82092	#N/A	#N/A	#N/A	#N/A
		1	1	1	1	1	1	0	0	0	0	0	0	0	0	0	0					0.41	0.41	0.414693		0.00469278	0.00469278	1											0.333333	2.23979	2.41142	2.58305	2.75468	2.92632	3.09795	#N/A	#N/A	#N/A	#N/A
		1	1	1	1	1	1	0	0	0	0	0	0	0	0	0	0					0.47	0.47	0.469474		-0.000525984	-0.000525984	1											0.25	1.97844	2.13004	2.28165	2.43325	2.58485	2.73646	#N/A	#N/A	#N/A	#N/A
		0	0	0	0	0	0	0	0	0	0	0	0	0	0	0	0					#DIV/0!	#N/A	#N/A		#DIV/0!		1											#N/A	#N/A	#N/A	#N/A	#N/A	#N/A	#N/A	#N/A	#N/A	#N/A	#N/A
		0	0	0	0	0	0	0	0	0	0	0	0	0	0	0	0					#DIV/0!	#N/A	#N/A		#DIV/0!		1											#N/A	#N/A	#N/A	#N/A	#N/A	#N/A	#N/A	#N/A	#N/A	#N/A	#N/A
		0	0	0	0	0	0	0	0	0	0	0	0	0	0	0	0					#DIV/0!	#N/A	#N/A		#DIV/0!		1											#N/A	#N/A	#N/A	#N/A	#N/A	#N/A	#N/A	#N/A	#N/A	#N/A	#N/A
		0	0	0	0	0	0	0	0	0	0	0	0	0	0	0	0					#DIV/0!	#N/A	#N/A		#DIV/0!		1											#N/A	#N/A	#N/A	#N/A	#N/A	#N/A	#N/A	#N/A	#N/A	#N/A	#N/A
		0	0	0	0	0	0	0	0	0	0	0	0	0	0	0	0					#DIV/0!	#N/A	#N/A		#DIV/0!		1											#N/A	#N/A	#N/A	#N/A	#N/A	#N/A	#N/A	#N/A	#N/A	#N/A	#N/A
		0	0	0	0	0	0	0	0	0	0	0	0	0	0	0	0					#DIV/0!	#N/A	#N/A		#DIV/0!		1											#N/A	#N/A	#N/A	#N/A	#N/A	#N/A	#N/A	#N/A	#N/A	#N/A	#N/A
		0	0	0	0	0	0	0	0	0	0	0	0	0	0	0	0					#DIV/0!	#N/A	#N/A		#DIV/0!		1											#N/A	#N/A	#N/A	#N/A	#N/A	#N/A	#N/A	#N/A	#N/A	#N/A	#N/A
		0	0	0	0	0	0	0	0	0	0	0	0	0	0	0	0					#DIV/0!	#N/A	#N/A		#DIV/0!		1											#N/A	#N/A	#N/A	#N/A	#N/A	#N/A	#N/A	#N/A	#N/A	#N/A	#N/A
		0	0	0	0	0	0	0	0	0	0	0	0	0	0	0	0					#DIV/0!	#N/A	#N/A		#DIV/0!		1											#N/A	#N/A	#N/A	#N/A	#N/A	#N/A	#N/A	#N/A	#N/A	#N/A	#N/A
		0	0	0	0	0	0	0	0	0	0	0	0	0	0	0	0					#DIV/0!	#N/A	#N/A		#DIV/0!		1											#N/A	#N/A	#N/A	#N/A	#N/A	#N/A	#N/A	#N/A	#N/A	#N/A	#N/A
		0	0	0	0	0	0	0	0	0	0	0	0	0	0	0	0					#DIV/0!	#N/A	#N/A		#DIV/0!		1											#N/A	#N/A	#N/A	#N/A	#N/A	#N/A	#N/A	#N/A	#N/A	#N/A	#N/A
																						0.26	0.26	0.263944		0.00394392	0.00394392	1
n	24																					0.31	0.31	0.313886		0.0038861	0.0038861	1												0.31	0.28	0.26	0.25	0.23	0.22	#DIV/0!	#DIV/0!	#DIV/0!	#DIV/0!
																						0.38	0.38	0.387139		0.00713858	0.00713858	1												0.37	0.33	0.31	0.29	0.28	0.27	#DIV/0!	#DIV/0!	#DIV/0!	#DIV/0!
																						0.43	0.43	0.43828		0.00827989	0.00827989	1												0.45	0.41	0.38	0.36	0.34	0.33	#DIV/0!	#DIV/0!	#DIV/0!	#DIV/0!
																						#DIV/0!	#N/A	#N/A		#DIV/0!		1												0.51	0.47	0.43	0.41	0.39	0.37	#DIV/0!	#DIV/0!	#DIV/0!	#DIV/0!
																						#DIV/0!	#N/A	#N/A		#DIV/0!		1												#DIV/0!	#DIV/0!	#DIV/0!	#DIV/0!	#DIV/0!	#DIV/0!	#DIV/0!	#DIV/0!	#DIV/0!	#DIV/0!
																						#DIV/0!	#N/A	#N/A		#DIV/0!		1												#DIV/0!	#DIV/0!	#DIV/0!	#DIV/0!	#DIV/0!	#DIV/0!	#DIV/0!	#DIV/0!	#DIV/0!	#DIV/0!
																						#DIV/0!	#N/A	#N/A		#DIV/0!		1												#DIV/0!	#DIV/0!	#DIV/0!	#DIV/0!	#DIV/0!	#DIV/0!	#DIV/0!	#DIV/0!	#DIV/0!	#DIV/0!
																						#DIV/0!	#N/A	#N/A		#DIV/0!		1												#DIV/0!	#DIV/0!	#DIV/0!	#DIV/0!	#DIV/0!	#DIV/0!	#DIV/0!	#DIV/0!	#DIV/0!	#DIV/0!
																						#DIV/0!	#N/A	#N/A		#DIV/0!		1												#DIV/0!	#DIV/0!	#DIV/0!	#DIV/0!	#DIV/0!	#DIV/0!	#DIV/0!	#DIV/0!	#DIV/0!	#DIV/0!
																						#DIV/0!	#N/A	#N/A		#DIV/0!		1												#DIV/0!	#DIV/0!	#DIV/0!	#DIV/0!	#DIV/0!	#DIV/0!	#DIV/0!	#DIV/0!	#DIV/0!	#DIV/0!
																						#DIV/0!	#N/A	#N/A		#DIV/0!		1												#DIV/0!	#DIV/0!	#DIV/0!	#DIV/0!	#DIV/0!	#DIV/0!	#DIV/0!	#DIV/0!	#DIV/0!	#DIV/0!
																						#DIV/0!	#N/A	#N/A		#DIV/0!		1												#DIV/0!	#DIV/0!	#DIV/0!	#DIV/0!	#DIV/0!	#DIV/0!	#DIV/0!	#DIV/0!	#DIV/0!	#DIV/0!
																						#DIV/0!	#N/A	#N/A		#DIV/0!		1												#DIV/0!	#DIV/0!	#DIV/0!	#DIV/0!	#DIV/0!	#DIV/0!	#DIV/0!	#DIV/0!	#DIV/0!	#DIV/0!
																						#DIV/0!	#N/A	#N/A		#DIV/0!		1												#DIV/0!	#DIV/0!	#DIV/0!	#DIV/0!	#DIV/0!	#DIV/0!	#DIV/0!	#DIV/0!	#DIV/0!	#DIV/0!
																						0.25	0.25	0.247499		-0.00250111	-0.00250111	1												#DIV/0!	#DIV/0!	#DIV/0!	#DIV/0!	#DIV/0!	#DIV/0!	#DIV/0!	#DIV/0!	#DIV/0!	#DIV/0!
																						0.29	0.29	0.294329		0.00432943	0.00432943	1
																						0.36	0.36	0.363018		0.00301792	0.00301792	1												1/s	0	5	10	15	20	25	0	0	0
																						0.41	0.41	0.410973		0.000972863	0.000972863	1											1	0.666667	3.28521	3.53695	3.78868	4.04042	4.29216	4.5439	#N/A	#N/A	#N/A
																						#DIV/0!	#N/A	#N/A		#DIV/0!		1											2	0.5	2.7625	2.97418	3.18587	3.39755	3.60924	3.82092	#N/A	#N/A	#N/A
																						#DIV/0!	#N/A	#N/A		#DIV/0!		1											3	0.333333	2.23979	2.41142	2.58305	2.75468	2.92632	3.09795	#N/A	#N/A	#N/A
																						#DIV/0!	#N/A	#N/A		#DIV/0!		1											4	0.25	1.97844	2.13004	2.28165	2.43325	2.58485	2.73646	#N/A	#N/A	#N/A
																						#DIV/0!	#N/A	#N/A		#DIV/0!		1											5	#N/A	#N/A	#N/A	#N/A	#N/A	#N/A	#N/A	#N/A	#N/A	#N/A
																						#DIV/0!	#N/A	#N/A		#DIV/0!		1											6	#N/A	#N/A	#N/A	#N/A	#N/A	#N/A	#N/A	#N/A	#N/A	#N/A
																						#DIV/0!	#N/A	#N/A		#DIV/0!		1											7	#N/A	#N/A	#N/A	#N/A	#N/A	#N/A	#N/A	#N/A	#N/A	#N/A
																						#DIV/0!	#N/A	#N/A		#DIV/0!		1											8	#N/A	#N/A	#N/A	#N/A	#N/A	#N/A	#N/A	#N/A	#N/A	#N/A
																						#DIV/0!	#N/A	#N/A		#DIV/0!		1											9	#N/A	#N/A	#N/A	#N/A	#N/A	#N/A	#N/A	#N/A	#N/A	#N/A
																						#DIV/0!	#N/A	#N/A		#DIV/0!		1											10	#N/A	#N/A	#N/A	#N/A	#N/A	#N/A	#N/A	#N/A	#N/A	#N/A
																						#DIV/0!	#N/A	#N/A		#DIV/0!		1											11	#N/A	#N/A	#N/A	#N/A	#N/A	#N/A	#N/A	#N/A	#N/A	#N/A
																						#DIV/0!	#N/A	#N/A		#DIV/0!		1											12	#N/A	#N/A	#N/A	#N/A	#N/A	#N/A	#N/A	#N/A	#N/A	#N/A
																						0.23	0.23	0.232983		0.00298289	0.00298289	1											13	#N/A	#N/A	#N/A	#N/A	#N/A	#N/A	#N/A	#N/A	#N/A	#N/A
																						0.28	0.28	0.277067		-0.00293322	-0.00293322	1											14	#N/A	#N/A	#N/A	#N/A	#N/A	#N/A	#N/A	#N/A	#N/A	#N/A
																						0.34	0.34	0.341727		0.00172664	0.00172664	1											15	#N/A	#N/A	#N/A	#N/A	#N/A	#N/A	#N/A	#N/A	#N/A	#N/A
																						0.39	0.39	0.386869		-0.00313101	-0.00313101	1
																						#DIV/0!	#N/A	#N/A		#DIV/0!		1
																						#DIV/0!	#N/A	#N/A		#DIV/0!		1
																						#DIV/0!	#N/A	#N/A		#DIV/0!		1
																						#DIV/0!	#N/A	#N/A		#DIV/0!		1
																						#DIV/0!	#N/A	#N/A		#DIV/0!		1
																						#DIV/0!	#N/A	#N/A		#DIV/0!		1
																						#DIV/0!	#N/A	#N/A		#DIV/0!		1
																						#DIV/0!	#N/A	#N/A		#DIV/0!		1
																						#DIV/0!	#N/A	#N/A		#DIV/0!		1
																						#DIV/0!	#N/A	#N/A		#DIV/0!		1
																						#DIV/0!	#N/A	#N/A		#DIV/0!		1
																						0.22	0.22	0.220075		7.53084e-05	7.53084e-05	1
																						0.27	0.27	0.261717		-0.00828311	-0.00828311	1
																						0.33	0.33	0.322794		-0.0072055	-0.0072055	1
																						0.37	0.37	0.365436		-0.0045641	-0.0045641	1
																						#DIV/0!	#N/A	#N/A		#DIV/0!		1
																						#DIV/0!	#N/A	#N/A		#DIV/0!		1
																						#DIV/0!	#N/A	#N/A		#DIV/0!		1
																						#DIV/0!	#N/A	#N/A		#DIV/0!		1
																						#DIV/0!	#N/A	#N/A		#DIV/0!		1
																						#DIV/0!	#N/A	#N/A		#DIV/0!		1
																						#DIV/0!	#N/A	#N/A		#DIV/0!		1
																						#DIV/0!	#N/A	#N/A		#DIV/0!		1
																						#DIV/0!	#N/A	#N/A		#DIV/0!		1
																						#DIV/0!	#N/A	#N/A		#DIV/0!		1
																						#DIV/0!	#N/A	#N/A		#DIV/0!		1
																						#DIV/0!	#N/A	#N/A		#DIV/0!		1
																						#DIV/0!	#N/A	#N/A		#DIV/0!		1
																						#DIV/0!	#N/A	#N/A		#DIV/0!		1
																						#DIV/0!	#N/A	#N/A		#DIV/0!		1
																						#DIV/0!	#N/A	#N/A		#DIV/0!		1
																						#DIV/0!	#N/A	#N/A		#DIV/0!		1
																						#DIV/0!	#N/A	#N/A		#DIV/0!		1
																						#DIV/0!	#N/A	#N/A		#DIV/0!		1
																						#DIV/0!	#N/A	#N/A		#DIV/0!		1
																						#DIV/0!	#N/A	#N/A		#DIV/0!		1
																						#DIV/0!	#N/A	#N/A		#DIV/0!		1
																						#DIV/0!	#N/A	#N/A		#DIV/0!		1
																						#DIV/0!	#N/A	#N/A		#DIV/0!		1
																						#DIV/0!	#N/A	#N/A		#DIV/0!		1
																						#DIV/0!	#N/A	#N/A		#DIV/0!		1
																						#DIV/0!	#N/A	#N/A		#DIV/0!		1
																						#DIV/0!	#N/A	#N/A		#DIV/0!		1
																						#DIV/0!	#N/A	#N/A		#DIV/0!		1
																						#DIV/0!	#N/A	#N/A		#DIV/0!		1
																						#DIV/0!	#N/A	#N/A		#DIV/0!		1
																						#DIV/0!	#N/A	#N/A		#DIV/0!		1
																						#DIV/0!	#N/A	#N/A		#DIV/0!		1
																						#DIV/0!	#N/A	#N/A		#DIV/0!		1
																						#DIV/0!	#N/A	#N/A		#DIV/0!		1
																						#DIV/0!	#N/A	#N/A		#DIV/0!		1
																						#DIV/0!	#N/A	#N/A		#DIV/0!		1
																						#DIV/0!	#N/A	#N/A		#DIV/0!		1
																						#DIV/0!	#N/A	#N/A		#DIV/0!		1
																						#DIV/0!	#N/A	#N/A		#DIV/0!		1
																						#DIV/0!	#N/A	#N/A		#DIV/0!		1
																						#DIV/0!	#N/A	#N/A		#DIV/0!		1
																						#DIV/0!	#N/A	#N/A		#DIV/0!		1
																						#DIV/0!	#N/A	#N/A		#DIV/0!		1
																						#DIV/0!	#N/A	#N/A		#DIV/0!		1
																						#DIV/0!	#N/A	#N/A		#DIV/0!		1
																						#DIV/0!	#N/A	#N/A		#DIV/0!		1
																						#DIV/0!	#N/A	#N/A		#DIV/0!		1
																						#DIV/0!	#N/A	#N/A		#DIV/0!		1
																						#DIV/0!	#N/A	#N/A		#DIV/0!		1
																						#DIV/0!	#N/A	#N/A		#DIV/0!		1
																						#DIV/0!	#N/A	#N/A		#DIV/0!		1
																						#DIV/0!	#N/A	#N/A		#DIV/0!		1
																						#DIV/0!	#N/A	#N/A		#DIV/0!		1
																						#DIV/0!	#N/A	#N/A		#DIV/0!		1
																						#DIV/0!	#N/A	#N/A		#DIV/0!		1
																						#DIV/0!	#N/A	#N/A		#DIV/0!		1
																						#DIV/0!	#N/A	#N/A		#DIV/0!		1
																						#DIV/0!	#N/A	#N/A		#DIV/0!		1
																						#DIV/0!	#N/A	#N/A		#DIV/0!		1
																						#DIV/0!	#N/A	#N/A		#DIV/0!		1
																						#DIV/0!	#N/A	#N/A		#DIV/0!		1
																						#DIV/0!	#N/A	#N/A		#DIV/0!		1
																						#DIV/0!	#N/A	#N/A		#DIV/0!		1
																						#DIV/0!	#N/A	#N/A		#DIV/0!		1
																						#DIV/0!	#N/A	#N/A		#DIV/0!		1
																						#DIV/0!	#N/A	#N/A		#DIV/0!		1
																						#DIV/0!	#N/A	#N/A		#DIV/0!		1
																						#DIV/0!	#N/A	#N/A		#DIV/0!		1
																						#DIV/0!	#N/A	#N/A		#DIV/0!		1
																						#DIV/0!	#N/A	#N/A		#DIV/0!		1
																						#DIV/0!	#N/A	#N/A		#DIV/0!		1
																						#DIV/0!	#N/A	#N/A		#DIV/0!		1
																						#DIV/0!	#N/A	#N/A		#DIV/0!		1
																						#DIV/0!	#N/A	#N/A		#DIV/0!		1
																						#DIV/0!	#N/A	#N/A		#DIV/0!		1
																						#DIV/0!	#N/A	#N/A		#DIV/0!		1
																						#DIV/0!	#N/A	#N/A		#DIV/0!		1
																						#DIV/0!	#N/A	#N/A		#DIV/0!		1
																						#DIV/0!	#N/A	#N/A		#DIV/0!		1
																						#DIV/0!	#N/A	#N/A		#DIV/0!		1
																						#DIV/0!	#N/A	#N/A		#DIV/0!		1
																						#DIV/0!	#N/A	#N/A		#DIV/0!		1
																						#DIV/0!	#N/A	#N/A		#DIV/0!		1
																						#DIV/0!	#N/A	#N/A		#DIV/0!		1
																						#DIV/0!	#N/A	#N/A		#DIV/0!		1
																						#DIV/0!	#N/A	#N/A		#DIV/0!		1
																						#DIV/0!	#N/A	#N/A		#DIV/0!		1
																						#DIV/0!	#N/A	#N/A		#DIV/0!		1
																						#DIV/0!	#N/A	#N/A		#DIV/0!		1
																						#DIV/0!	#N/A	#N/A		#DIV/0!		1
																						#DIV/0!	#N/A	#N/A		#DIV/0!		1
																						#DIV/0!	#N/A	#N/A		#DIV/0!		1
																						#DIV/0!	#N/A	#N/A		#DIV/0!		1
																						#DIV/0!	#N/A	#N/A		#DIV/0!		1
																						#DIV/0!	#N/A	#N/A		#DIV/0!		1
																						#DIV/0!	#N/A	#N/A		#DIV/0!		1
																						#DIV/0!	#N/A	#N/A		#DIV/0!		1
																						#DIV/0!	#N/A	#N/A		#DIV/0!		1
																						#DIV/0!	#N/A	#N/A		#DIV/0!		1
																						#DIV/0!	#N/A	#N/A		#DIV/0!		1
																						#DIV/0!	#N/A	#N/A		#DIV/0!		1
																						#DIV/0!	#N/A	#N/A		#DIV/0!		1
																						#DIV/0!	#N/A	#N/A		#DIV/0!		1
																						#DIV/0!	#N/A	#N/A		#DIV/0!		1
																						#DIV/0!	#N/A	#N/A		#DIV/0!		1
																						#DIV/0!	#N/A	#N/A		#DIV/0!		1
																						#DIV/0!	#N/A	#N/A		#DIV/0!		1
																						#DIV/0!	#N/A	#N/A		#DIV/0!		1
																						#DIV/0!	#N/A	#N/A		#DIV/0!		1
																						#DIV/0!	#N/A	#N/A		#DIV/0!		1
																						#DIV/0!	#N/A	#N/A		#DIV/0!		1
																						#DIV/0!	#N/A	#N/A		#DIV/0!		1
																						#DIV/0!	#N/A	#N/A		#DIV/0!		1
																						#DIV/0!	#N/A	#N/A		#DIV/0!		1
																						#DIV/0!	#N/A	#N/A		#DIV/0!		1
																						#DIV/0!	#N/A	#N/A		#DIV/0!		1
																						#DIV/0!	#N/A	#N/A		#DIV/0!		1
																						#DIV/0!	#N/A	#N/A		#DIV/0!		1
																						#DIV/0!	#N/A	#N/A		#DIV/0!		1
																						#DIV/0!	#N/A	#N/A		#DIV/0!		1
																						#DIV/0!	#N/A	#N/A		#DIV/0!		1
																						#DIV/0!	#N/A	#N/A		#DIV/0!		1
																						#DIV/0!	#N/A	#N/A		#DIV/0!		1
																						#DIV/0!	#N/A	#N/A		#DIV/0!		1
																						#DIV/0!	#N/A	#N/A		#DIV/0!		1
																						#DIV/0!	#N/A	#N/A		#DIV/0!		1
																						#DIV/0!	#N/A	#N/A		#DIV/0!		1
																						#DIV/0!	#N/A	#N/A		#DIV/0!		1
																						#DIV/0!	#N/A	#N/A		#DIV/0!		1
																						#DIV/0!	#N/A	#N/A		#DIV/0!		1
																						#DIV/0!	#N/A	#N/A		#DIV/0!		1
																						#DIV/0!	#N/A	#N/A		#DIV/0!		1
																						#DIV/0!	#N/A	#N/A		#DIV/0!		1
																						#DIV/0!	#N/A	#N/A		#DIV/0!		1
																						#DIV/0!	#N/A	#N/A		#DIV/0!		1
																						#DIV/0!	#N/A	#N/A		#DIV/0!		1
																						#DIV/0!	#N/A	#N/A		#DIV/0!		1
																						#DIV/0!	#N/A	#N/A		#DIV/0!		1
																						#DIV/0!	#N/A	#N/A		#DIV/0!		1
																						#DIV/0!	#N/A	#N/A		#DIV/0!		1
																						#DIV/0!	#N/A	#N/A		#DIV/0!		1
																						#DIV/0!	#N/A	#N/A		#DIV/0!		1
																						#DIV/0!	#N/A	#N/A		#DIV/0!		1
																						#DIV/0!	#N/A	#N/A		#DIV/0!		1
																						#DIV/0!	#N/A	#N/A		#DIV/0!		1
																						#DIV/0!	#N/A	#N/A		#DIV/0!		1
																						#DIV/0!	#N/A	#N/A		#DIV/0!		1
																						#DIV/0!	#N/A	#N/A		#DIV/0!		1
																						#DIV/0!	#N/A	#N/A		#DIV/0!		1
																						#DIV/0!	#N/A	#N/A		#DIV/0!		1
																						#DIV/0!	#N/A	#N/A		#DIV/0!		1
																						#DIV/0!	#N/A	#N/A		#DIV/0!		1
																						#DIV/0!	#N/A	#N/A		#DIV/0!		1
																						#DIV/0!	#N/A	#N/A		#DIV/0!		1
																						#DIV/0!	#N/A	#N/A		#DIV/0!		1
																						#DIV/0!	#N/A	#N/A		#DIV/0!		1
																						#DIV/0!	#N/A	#N/A		#DIV/0!		1
																						#DIV/0!	#N/A	#N/A		#DIV/0!		1
																						#DIV/0!	#N/A	#N/A		#DIV/0!		1
																						#DIV/0!	#N/A	#N/A		#DIV/0!		1
[truncated: 54 more columns]

## Sheet: Competitive
																							Calculated values
		No Inhibitor	[I]1	[I]2	[I]3	[I]4	[I]5	[I]6	[I]7	[I]8	[I]9	[I]10	[I]11	[I]12	[I]13	[I]14	[I]15						No Inhibitor	[I]1	[I]2	[I]3	[I]4	[I]5	[I]6	[I]7	[I]8	[I]9	[I]10	[I]11	[I]12	[I]13	[I]14	[I]15
		0	5	10	15	20	25	0	0	0	0	0	0	0	0	0	0		Km	Vmax	Ki		0	5	10	15	20	25	0	0	0	0	0	0	0	0	0	0
[S]1	1.5	0.31	0.28	0.26	0.25	0.23	0.22	0	0	0	0	0	0	0	0	0	0		1.99651	0.736988	27.9223		0.316167	0.286838	0.262489	0.24195	0.224392	0.20921	#DIV/0!	#DIV/0!	#DIV/0!	#DIV/0!	#DIV/0!	#DIV/0!	#DIV/0!	#DIV/0!	#DIV/0!	#DIV/0!		0.316167	0.286838	0.262489	0.24195	0.224392	0.20921	0	0	0	0
[S]2	2	0.37	0.33	0.31	0.29	0.28	0.27	0	0	0	0	0	0	0	0	0	0						0.368816	0.338532	0.312844	0.29078	0.271623	0.254834	#DIV/0!	#DIV/0!	#DIV/0!	#DIV/0!	#DIV/0!	#DIV/0!	#DIV/0!	#DIV/0!	#DIV/0!	#DIV/0!		0.368816	0.338532	0.312844	0.29078	0.271623	0.254834	0	0	0	0
[S]3	3	0.45	0.41	0.38	0.36	0.34	0.33	0	0	0	0	0	0	0	0	0	0						0.442501	0.412954	0.387105	0.364302	0.344035	0.325905	#DIV/0!	#DIV/0!	#DIV/0!	#DIV/0!	#DIV/0!	#DIV/0!	#DIV/0!	#DIV/0!	#DIV/0!	#DIV/0!		0.442501	0.412954	0.387105	0.364302	0.344035	0.325905	0	0	0	0
[S]4	4	0.51	0.47	0.43	0.41	0.39	0.37	0	0	0	0	0	0	0	0	0	0						0.491611	0.46395	0.439237	0.417022	0.396947	0.378716	#DIV/0!	#DIV/0!	#DIV/0!	#DIV/0!	#DIV/0!	#DIV/0!	#DIV/0!	#DIV/0!	#DIV/0!	#DIV/0!		0.491611	0.46395	0.439237	0.417022	0.396947	0.378716	0	0	0	0
[S]5	0	0	0	0	0	0	0	0	0	0	0	0	0	0	0	0	0						#DIV/0!	#DIV/0!	#DIV/0!	#DIV/0!	#DIV/0!	#DIV/0!	#DIV/0!	#DIV/0!	#DIV/0!	#DIV/0!	#DIV/0!	#DIV/0!	#DIV/0!	#DIV/0!	#DIV/0!	#DIV/0!		0	0	0	0	0	0	0	0	0	0
[S]6	0	0	0	0	0	0	0	0	0	0	0	0	0	0	0	0	0			Sum R2	0.00148735		#DIV/0!	#DIV/0!	#DIV/0!	#DIV/0!	#DIV/0!	#DIV/0!	#DIV/0!	#DIV/0!	#DIV/0!	#DIV/0!	#DIV/0!	#DIV/0!	#DIV/0!	#DIV/0!	#DIV/0!	#DIV/0!		0	0	0	0	0	0	0	0	0	0
[S]7	0	0	0	0	0	0	0	0	0	0	0	0	0	0	0	0	0			Sum residuals %	0.50059		#DIV/0!	#DIV/0!	#DIV/0!	#DIV/0!	#DIV/0!	#DIV/0!	#DIV/0!	#DIV/0!	#DIV/0!	#DIV/0!	#DIV/0!	#DIV/0!	#DIV/0!	#DIV/0!	#DIV/0!	#DIV/0!		0	0	0	0	0	0	0	0	0	0
[S]8	0	0	0	0	0	0	0	0	0	0	0	0	0	0	0	0	0						#DIV/0!	#DIV/0!	#DIV/0!	#DIV/0!	#DIV/0!	#DIV/0!	#DIV/0!	#DIV/0!	#DIV/0!	#DIV/0!	#DIV/0!	#DIV/0!	#DIV/0!	#DIV/0!	#DIV/0!	#DIV/0!		0	0	0	0	0	0	0	0	0	0
[S]9	0	0	0	0	0	0	0	0	0	0	0	0	0	0	0	0	0						#DIV/0!	#DIV/0!	#DIV/0!	#DIV/0!	#DIV/0!	#DIV/0!	#DIV/0!	#DIV/0!	#DIV/0!	#DIV/0!	#DIV/0!	#DIV/0!	#DIV/0!	#DIV/0!	#DIV/0!	#DIV/0!		0	0	0	0	0	0	0	0	0	0
[S]10	0	0	0	0	0	0	0	0	0	0	0	0	0	0	0	0	0						#DIV/0!	#DIV/0!	#DIV/0!	#DIV/0!	#DIV/0!	#DIV/0!	#DIV/0!	#DIV/0!	#DIV/0!	#DIV/0!	#DIV/0!	#DIV/0!	#DIV/0!	#DIV/0!	#DIV/0!	#DIV/0!		0	0	0	0	0	0	0	0	0	0
[S]11	0	0	0	0	0	0	0	0	0	0	0	0	0	0	0	0	0						#DIV/0!	#DIV/0!	#DIV/0!	#DIV/0!	#DIV/0!	#DIV/0!	#DIV/0!	#DIV/0!	#DIV/0!	#DIV/0!	#DIV/0!	#DIV/0!	#DIV/0!	#DIV/0!	#DIV/0!	#DIV/0!		0	0	0	0	0	0	0	0	0	0
[S]12	0	0	0	0	0	0	0	0	0	0	0	0	0	0	0	0	0						#DIV/0!	#DIV/0!	#DIV/0!	#DIV/0!	#DIV/0!	#DIV/0!	#DIV/0!	#DIV/0!	#DIV/0!	#DIV/0!	#DIV/0!	#DIV/0!	#DIV/0!	#DIV/0!	#DIV/0!	#DIV/0!		0	0	0	0	0	0	0	0	0	0
[S]13	0	0	0	0	0	0	0	0	0	0	0	0	0	0	0	0	0						#DIV/0!	#DIV/0!	#DIV/0!	#DIV/0!	#DIV/0!	#DIV/0!	#DIV/0!	#DIV/0!	#DIV/0!	#DIV/0!	#DIV/0!	#DIV/0!	#DIV/0!	#DIV/0!	#DIV/0!	#DIV/0!		0	0	0	0	0	0	0	0	0	0
[S]14	0	0	0	0	0	0	0	0	0	0	0	0	0	0	0	0	0						#DIV/0!	#DIV/0!	#DIV/0!	#DIV/0!	#DIV/0!	#DIV/0!	#DIV/0!	#DIV/0!	#DIV/0!	#DIV/0!	#DIV/0!	#DIV/0!	#DIV/0!	#DIV/0!	#DIV/0!	#DIV/0!		0	0	0	0	0	0	0	0	0	0
[S]15	0	0	0	0	0	0	0	0	0	0	0	0	0	0	0	0	0						#DIV/0!	#DIV/0!	#DIV/0!	#DIV/0!	#DIV/0!	#DIV/0!	#DIV/0!	#DIV/0!	#DIV/0!	#DIV/0!	#DIV/0!	#DIV/0!	#DIV/0!	#DIV/0!	#DIV/0!	#DIV/0!		0	0	0	0	0	0	0	0	0	0
	1	1	1	1	1	1	1	#DIV/0!	#DIV/0!	#DIV/0!	#DIV/0!	#DIV/0!	#DIV/0!	#DIV/0!	#DIV/0!	#DIV/0!	#DIV/0!																					1.5	1.5	0.316167	0.286838	0.262489	0.24195	0.224392	0.20921	#N/A	#N/A	#N/A	#N/A
	1	1	1	1	1	1	1	#DIV/0!	#DIV/0!	#DIV/0!	#DIV/0!	#DIV/0!	#DIV/0!	#DIV/0!	#DIV/0!	#DIV/0!	#DIV/0!					0.31	0.31	0.316167		0.00616705	0.00616705	2										2	2	0.368816	0.338532	0.312844	0.29078	0.271623	0.254834	#N/A	#N/A	#N/A	#N/A
	1	1	1	1	1	1	1	#DIV/0!	#DIV/0!	#DIV/0!	#DIV/0!	#DIV/0!	#DIV/0!	#DIV/0!	#DIV/0!	#DIV/0!	#DIV/0!					0.37	0.37	0.368816		-0.00118446	-0.00118446	2										3	3	0.442501	0.412954	0.387105	0.364302	0.344035	0.325905	#N/A	#N/A	#N/A	#N/A
	1	1	1	1	1	1	1	#DIV/0!	#DIV/0!	#DIV/0!	#DIV/0!	#DIV/0!	#DIV/0!	#DIV/0!	#DIV/0!	#DIV/0!	#DIV/0!					0.45	0.45	0.442501		-0.00749862	-0.00749862	2										4	4	0.491611	0.46395	0.439237	0.417022	0.396947	0.378716	#N/A	#N/A	#N/A	#N/A
	#DIV/0!	#DIV/0!	#DIV/0!	#DIV/0!	#DIV/0!	#DIV/0!	#DIV/0!	#DIV/0!	#DIV/0!	#DIV/0!	#DIV/0!	#DIV/0!	#DIV/0!	#DIV/0!	#DIV/0!	#DIV/0!	#DIV/0!					0.51	0.51	0.491611		-0.018389	-0.018389	2										#DIV/0!	#N/A	#N/A	#N/A	#N/A	#N/A	#N/A	#N/A	#N/A	#N/A	#N/A	#N/A
	#DIV/0!	#DIV/0!	#DIV/0!	#DIV/0!	#DIV/0!	#DIV/0!	#DIV/0!	#DIV/0!	#DIV/0!	#DIV/0!	#DIV/0!	#DIV/0!	#DIV/0!	#DIV/0!	#DIV/0!	#DIV/0!	#DIV/0!					#DIV/0!	#N/A	#N/A		#DIV/0!		2										#DIV/0!	#N/A	#N/A	#N/A	#N/A	#N/A	#N/A	#N/A	#N/A	#N/A	#N/A	#N/A
	#DIV/0!	#DIV/0!	#DIV/0!	#DIV/0!	#DIV/0!	#DIV/0!	#DIV/0!	#DIV/0!	#DIV/0!	#DIV/0!	#DIV/0!	#DIV/0!	#DIV/0!	#DIV/0!	#DIV/0!	#DIV/0!	#DIV/0!					#DIV/0!	#N/A	#N/A		#DIV/0!		2										#DIV/0!	#N/A	#N/A	#N/A	#N/A	#N/A	#N/A	#N/A	#N/A	#N/A	#N/A	#N/A
	#DIV/0!	#DIV/0!	#DIV/0!	#DIV/0!	#DIV/0!	#DIV/0!	#DIV/0!	#DIV/0!	#DIV/0!	#DIV/0!	#DIV/0!	#DIV/0!	#DIV/0!	#DIV/0!	#DIV/0!	#DIV/0!	#DIV/0!					#DIV/0!	#N/A	#N/A		#DIV/0!		2										#DIV/0!	#N/A	#N/A	#N/A	#N/A	#N/A	#N/A	#N/A	#N/A	#N/A	#N/A	#N/A
	#DIV/0!	#DIV/0!	#DIV/0!	#DIV/0!	#DIV/0!	#DIV/0!	#DIV/0!	#DIV/0!	#DIV/0!	#DIV/0!	#DIV/0!	#DIV/0!	#DIV/0!	#DIV/0!	#DIV/0!	#DIV/0!	#DIV/0!					#DIV/0!	#N/A	#N/A		#DIV/0!		2										#DIV/0!	#N/A	#N/A	#N/A	#N/A	#N/A	#N/A	#N/A	#N/A	#N/A	#N/A	#N/A
	#DIV/0!	#DIV/0!	#DIV/0!	#DIV/0!	#DIV/0!	#DIV/0!	#DIV/0!	#DIV/0!	#DIV/0!	#DIV/0!	#DIV/0!	#DIV/0!	#DIV/0!	#DIV/0!	#DIV/0!	#DIV/0!	#DIV/0!					#DIV/0!	#N/A	#N/A		#DIV/0!		2										#DIV/0!	#N/A	#N/A	#N/A	#N/A	#N/A	#N/A	#N/A	#N/A	#N/A	#N/A	#N/A
	#DIV/0!	#DIV/0!	#DIV/0!	#DIV/0!	#DIV/0!	#DIV/0!	#DIV/0!	#DIV/0!	#DIV/0!	#DIV/0!	#DIV/0!	#DIV/0!	#DIV/0!	#DIV/0!	#DIV/0!	#DIV/0!	#DIV/0!					#DIV/0!	#N/A	#N/A		#DIV/0!		2										#DIV/0!	#N/A	#N/A	#N/A	#N/A	#N/A	#N/A	#N/A	#N/A	#N/A	#N/A	#N/A
	#DIV/0!	#DIV/0!	#DIV/0!	#DIV/0!	#DIV/0!	#DIV/0!	#DIV/0!	#DIV/0!	#DIV/0!	#DIV/0!	#DIV/0!	#DIV/0!	#DIV/0!	#DIV/0!	#DIV/0!	#DIV/0!	#DIV/0!					#DIV/0!	#N/A	#N/A		#DIV/0!		2										#DIV/0!	#N/A	#N/A	#N/A	#N/A	#N/A	#N/A	#N/A	#N/A	#N/A	#N/A	#N/A
	#DIV/0!	#DIV/0!	#DIV/0!	#DIV/0!	#DIV/0!	#DIV/0!	#DIV/0!	#DIV/0!	#DIV/0!	#DIV/0!	#DIV/0!	#DIV/0!	#DIV/0!	#DIV/0!	#DIV/0!	#DIV/0!	#DIV/0!					#DIV/0!	#N/A	#N/A		#DIV/0!		2										#DIV/0!	#N/A	#N/A	#N/A	#N/A	#N/A	#N/A	#N/A	#N/A	#N/A	#N/A	#N/A
	#DIV/0!	#DIV/0!	#DIV/0!	#DIV/0!	#DIV/0!	#DIV/0!	#DIV/0!	#DIV/0!	#DIV/0!	#DIV/0!	#DIV/0!	#DIV/0!	#DIV/0!	#DIV/0!	#DIV/0!	#DIV/0!	#DIV/0!					#DIV/0!	#N/A	#N/A		#DIV/0!		2										#DIV/0!	#N/A	#N/A	#N/A	#N/A	#N/A	#N/A	#N/A	#N/A	#N/A	#N/A	#N/A
	#DIV/0!	#DIV/0!	#DIV/0!	#DIV/0!	#DIV/0!	#DIV/0!	#DIV/0!	#DIV/0!	#DIV/0!	#DIV/0!	#DIV/0!	#DIV/0!	#DIV/0!	#DIV/0!	#DIV/0!	#DIV/0!	#DIV/0!					#DIV/0!	#N/A	#N/A		#DIV/0!		2										#DIV/0!	#N/A	#N/A	#N/A	#N/A	#N/A	#N/A	#N/A	#N/A	#N/A	#N/A	#N/A
																						#DIV/0!	#N/A	#N/A		#DIV/0!		2
																						0.28	0.28	0.286838		0.00683838	0.00683838	2											0.666667	3.16288	3.48628	3.80968	4.13308	4.45648	4.77988	#N/A	#N/A	#N/A	#N/A
																						0.33	0.33	0.338532		0.00853188	0.00853188	2											0.5	2.71138	2.95393	3.19648	3.43903	3.68158	3.92413	#N/A	#N/A	#N/A	#N/A
																						0.41	0.41	0.412954		0.00295364	0.00295364	2											0.333333	2.25988	2.42158	2.58328	2.74498	2.90668	3.06838	#N/A	#N/A	#N/A	#N/A
																						0.47	0.47	0.46395		-0.00604969	-0.00604969	2											0.25	2.03413	2.1554	2.27668	2.39795	2.51923	2.6405	#N/A	#N/A	#N/A	#N/A
																						#DIV/0!	#N/A	#N/A		#DIV/0!		2											#N/A	#N/A	#N/A	#N/A	#N/A	#N/A	#N/A	#N/A	#N/A	#N/A	#N/A
																						#DIV/0!	#N/A	#N/A		#DIV/0!		2											#N/A	#N/A	#N/A	#N/A	#N/A	#N/A	#N/A	#N/A	#N/A	#N/A	#N/A
																						#DIV/0!	#N/A	#N/A		#DIV/0!		2											#N/A	#N/A	#N/A	#N/A	#N/A	#N/A	#N/A	#N/A	#N/A	#N/A	#N/A
																						#DIV/0!	#N/A	#N/A		#DIV/0!		2											#N/A	#N/A	#N/A	#N/A	#N/A	#N/A	#N/A	#N/A	#N/A	#N/A	#N/A
																						#DIV/0!	#N/A	#N/A		#DIV/0!		2											#N/A	#N/A	#N/A	#N/A	#N/A	#N/A	#N/A	#N/A	#N/A	#N/A	#N/A
																						#DIV/0!	#N/A	#N/A		#DIV/0!		2											#N/A	#N/A	#N/A	#N/A	#N/A	#N/A	#N/A	#N/A	#N/A	#N/A	#N/A
																						#DIV/0!	#N/A	#N/A		#DIV/0!		2											#N/A	#N/A	#N/A	#N/A	#N/A	#N/A	#N/A	#N/A	#N/A	#N/A	#N/A
																						#DIV/0!	#N/A	#N/A		#DIV/0!		2											#N/A	#N/A	#N/A	#N/A	#N/A	#N/A	#N/A	#N/A	#N/A	#N/A	#N/A
																						#DIV/0!	#N/A	#N/A		#DIV/0!		2											#N/A	#N/A	#N/A	#N/A	#N/A	#N/A	#N/A	#N/A	#N/A	#N/A	#N/A
																						#DIV/0!	#N/A	#N/A		#DIV/0!		2											#N/A	#N/A	#N/A	#N/A	#N/A	#N/A	#N/A	#N/A	#N/A	#N/A	#N/A
																						#DIV/0!	#N/A	#N/A		#DIV/0!		2											#N/A	#N/A	#N/A	#N/A	#N/A	#N/A	#N/A	#N/A	#N/A	#N/A	#N/A
																						0.26	0.26	0.262489		0.00248906	0.00248906	2
																						0.31	0.31	0.312844		0.00284407	0.00284407	2												0.31	0.28	0.26	0.25	0.23	0.22	#DIV/0!	#DIV/0!	#DIV/0!	#DIV/0!
																						0.38	0.38	0.387105		0.00710496	0.00710496	2												0.37	0.33	0.31	0.29	0.28	0.27	#DIV/0!	#DIV/0!	#DIV/0!	#DIV/0!
																						0.43	0.43	0.439237		0.00923651	0.00923651	2												0.45	0.41	0.38	0.36	0.34	0.33	#DIV/0!	#DIV/0!	#DIV/0!	#DIV/0!
																						#DIV/0!	#N/A	#N/A		#DIV/0!		2												0.51	0.47	0.43	0.41	0.39	0.37	#DIV/0!	#DIV/0!	#DIV/0!	#DIV/0!
																						#DIV/0!	#N/A	#N/A		#DIV/0!		2												#DIV/0!	#DIV/0!	#DIV/0!	#DIV/0!	#DIV/0!	#DIV/0!	#DIV/0!	#DIV/0!	#DIV/0!	#DIV/0!
																						#DIV/0!	#N/A	#N/A		#DIV/0!		2												#DIV/0!	#DIV/0!	#DIV/0!	#DIV/0!	#DIV/0!	#DIV/0!	#DIV/0!	#DIV/0!	#DIV/0!	#DIV/0!
																						#DIV/0!	#N/A	#N/A		#DIV/0!		2												#DIV/0!	#DIV/0!	#DIV/0!	#DIV/0!	#DIV/0!	#DIV/0!	#DIV/0!	#DIV/0!	#DIV/0!	#DIV/0!
																						#DIV/0!	#N/A	#N/A		#DIV/0!		2												#DIV/0!	#DIV/0!	#DIV/0!	#DIV/0!	#DIV/0!	#DIV/0!	#DIV/0!	#DIV/0!	#DIV/0!	#DIV/0!
																						#DIV/0!	#N/A	#N/A		#DIV/0!		2												#DIV/0!	#DIV/0!	#DIV/0!	#DIV/0!	#DIV/0!	#DIV/0!	#DIV/0!	#DIV/0!	#DIV/0!	#DIV/0!
																						#DIV/0!	#N/A	#N/A		#DIV/0!		2												#DIV/0!	#DIV/0!	#DIV/0!	#DIV/0!	#DIV/0!	#DIV/0!	#DIV/0!	#DIV/0!	#DIV/0!	#DIV/0!
																						#DIV/0!	#N/A	#N/A		#DIV/0!		2												#DIV/0!	#DIV/0!	#DIV/0!	#DIV/0!	#DIV/0!	#DIV/0!	#DIV/0!	#DIV/0!	#DIV/0!	#DIV/0!
																						#DIV/0!	#N/A	#N/A		#DIV/0!		2												#DIV/0!	#DIV/0!	#DIV/0!	#DIV/0!	#DIV/0!	#DIV/0!	#DIV/0!	#DIV/0!	#DIV/0!	#DIV/0!
																						#DIV/0!	#N/A	#N/A		#DIV/0!		2												#DIV/0!	#DIV/0!	#DIV/0!	#DIV/0!	#DIV/0!	#DIV/0!	#DIV/0!	#DIV/0!	#DIV/0!	#DIV/0!
																						#DIV/0!	#N/A	#N/A		#DIV/0!		2												#DIV/0!	#DIV/0!	#DIV/0!	#DIV/0!	#DIV/0!	#DIV/0!	#DIV/0!	#DIV/0!	#DIV/0!	#DIV/0!
																						0.25	0.25	0.24195		-0.00804976	-0.00804976	2												#DIV/0!	#DIV/0!	#DIV/0!	#DIV/0!	#DIV/0!	#DIV/0!	#DIV/0!	#DIV/0!	#DIV/0!	#DIV/0!
																						0.29	0.29	0.29078		0.000779692	0.000779692	2
																						0.36	0.36	0.364302		0.00430163	0.00430163	2												1/s	0	5	10	15	20	25	0	0	0
																						0.41	0.41	0.417022		0.00702247	0.00702247	2											1	0.666667	3.16288	3.48628	3.80968	4.13308	4.45648	4.77988	#N/A	#N/A	#N/A
																						#DIV/0!	#N/A	#N/A		#DIV/0!		2											2	0.5	2.71138	2.95393	3.19648	3.43903	3.68158	3.92413	#N/A	#N/A	#N/A
																						#DIV/0!	#N/A	#N/A		#DIV/0!		2											3	0.333333	2.25988	2.42158	2.58328	2.74498	2.90668	3.06838	#N/A	#N/A	#N/A
																						#DIV/0!	#N/A	#N/A		#DIV/0!		2											4	0.25	2.03413	2.1554	2.27668	2.39795	2.51923	2.6405	#N/A	#N/A	#N/A
																						#DIV/0!	#N/A	#N/A		#DIV/0!		2											5	#N/A	#N/A	#N/A	#N/A	#N/A	#N/A	#N/A	#N/A	#N/A	#N/A
																						#DIV/0!	#N/A	#N/A		#DIV/0!		2											6	#N/A	#N/A	#N/A	#N/A	#N/A	#N/A	#N/A	#N/A	#N/A	#N/A
																						#DIV/0!	#N/A	#N/A		#DIV/0!		2											7	#N/A	#N/A	#N/A	#N/A	#N/A	#N/A	#N/A	#N/A	#N/A	#N/A
																						#DIV/0!	#N/A	#N/A		#DIV/0!		2											8	#N/A	#N/A	#N/A	#N/A	#N/A	#N/A	#N/A	#N/A	#N/A	#N/A
																						#DIV/0!	#N/A	#N/A		#DIV/0!		2											9	#N/A	#N/A	#N/A	#N/A	#N/A	#N/A	#N/A	#N/A	#N/A	#N/A
																						#DIV/0!	#N/A	#N/A		#DIV/0!		2											10	#N/A	#N/A	#N/A	#N/A	#N/A	#N/A	#N/A	#N/A	#N/A	#N/A
																						#DIV/0!	#N/A	#N/A		#DIV/0!		2											11	#N/A	#N/A	#N/A	#N/A	#N/A	#N/A	#N/A	#N/A	#N/A	#N/A
																						#DIV/0!	#N/A	#N/A		#DIV/0!		2											12	#N/A	#N/A	#N/A	#N/A	#N/A	#N/A	#N/A	#N/A	#N/A	#N/A
																						0.23	0.23	0.224392		-0.00560766	-0.00560766	2											13	#N/A	#N/A	#N/A	#N/A	#N/A	#N/A	#N/A	#N/A	#N/A	#N/A
																						0.28	0.28	0.271623		-0.0083774	-0.0083774	2											14	#N/A	#N/A	#N/A	#N/A	#N/A	#N/A	#N/A	#N/A	#N/A	#N/A
																						0.34	0.34	0.344035		0.00403542	0.00403542	2											15	#N/A	#N/A	#N/A	#N/A	#N/A	#N/A	#N/A	#N/A	#N/A	#N/A
																						0.39	0.39	0.396947		0.00694718	0.00694718	2
																						#DIV/0!	#N/A	#N/A		#DIV/0!		2
																						#DIV/0!	#N/A	#N/A		#DIV/0!		2
																						#DIV/0!	#N/A	#N/A		#DIV/0!		2
																						#DIV/0!	#N/A	#N/A		#DIV/0!		2
																						#DIV/0!	#N/A	#N/A		#DIV/0!		2
																						#DIV/0!	#N/A	#N/A		#DIV/0!		2
																						#DIV/0!	#N/A	#N/A		#DIV/0!		2
																						#DIV/0!	#N/A	#N/A		#DIV/0!		2
																						#DIV/0!	#N/A	#N/A		#DIV/0!		2
																						#DIV/0!	#N/A	#N/A		#DIV/0!		2
																						#DIV/0!	#N/A	#N/A		#DIV/0!		2
																						0.22	0.22	0.20921		-0.0107897	-0.0107897	2
																						0.27	0.27	0.254834		-0.0151663	-0.0151663	2
																						0.33	0.33	0.325905		-0.00409479	-0.00409479	2
																						0.37	0.37	0.378716		0.00871595	0.00871595	2
																						#DIV/0!	#N/A	#N/A		#DIV/0!		2
																						#DIV/0!	#N/A	#N/A		#DIV/0!		2
																						#DIV/0!	#N/A	#N/A		#DIV/0!		2
																						#DIV/0!	#N/A	#N/A		#DIV/0!		2
																						#DIV/0!	#N/A	#N/A		#DIV/0!		2
																						#DIV/0!	#N/A	#N/A		#DIV/0!		2
																						#DIV/0!	#N/A	#N/A		#DIV/0!		2
																						#DIV/0!	#N/A	#N/A		#DIV/0!		2
																						#DIV/0!	#N/A	#N/A		#DIV/0!		2
																						#DIV/0!	#N/A	#N/A		#DIV/0!		2
																						#DIV/0!	#N/A	#N/A		#DIV/0!		2
																						#DIV/0!	#N/A	#N/A		#DIV/0!		2
																						#DIV/0!	#N/A	#N/A		#DIV/0!		2
																						#DIV/0!	#N/A	#N/A		#DIV/0!		2
																						#DIV/0!	#N/A	#N/A		#DIV/0!		2
																						#DIV/0!	#N/A	#N/A		#DIV/0!		2
																						#DIV/0!	#N/A	#N/A		#DIV/0!		2
																						#DIV/0!	#N/A	#N/A		#DIV/0!		2
																						#DIV/0!	#N/A	#N/A		#DIV/0!		2
																						#DIV/0!	#N/A	#N/A		#DIV/0!		2
																						#DIV/0!	#N/A	#N/A		#DIV/0!		2
																						#DIV/0!	#N/A	#N/A		#DIV/0!		2
																						#DIV/0!	#N/A	#N/A		#DIV/0!		2
																						#DIV/0!	#N/A	#N/A		#DIV/0!		2
																						#DIV/0!	#N/A	#N/A		#DIV/0!		2
																						#DIV/0!	#N/A	#N/A		#DIV/0!		2
																						#DIV/0!	#N/A	#N/A		#DIV/0!		2
																						#DIV/0!	#N/A	#N/A		#DIV/0!		2
																						#DIV/0!	#N/A	#N/A		#DIV/0!		2
																						#DIV/0!	#N/A	#N/A		#DIV/0!		2
																						#DIV/0!	#N/A	#N/A		#DIV/0!		2
																						#DIV/0!	#N/A	#N/A		#DIV/0!		2
																						#DIV/0!	#N/A	#N/A		#DIV/0!		2
																						#DIV/0!	#N/A	#N/A		#DIV/0!		2
																						#DIV/0!	#N/A	#N/A		#DIV/0!		2
																						#DIV/0!	#N/A	#N/A		#DIV/0!		2
																						#DIV/0!	#N/A	#N/A		#DIV/0!		2
																						#DIV/0!	#N/A	#N/A		#DIV/0!		2
																						#DIV/0!	#N/A	#N/A		#DIV/0!		2
																						#DIV/0!	#N/A	#N/A		#DIV/0!		2
																						#DIV/0!	#N/A	#N/A		#DIV/0!		2
																						#DIV/0!	#N/A	#N/A		#DIV/0!		2
																						#DIV/0!	#N/A	#N/A		#DIV/0!		2
																						#DIV/0!	#N/A	#N/A		#DIV/0!		2
																						#DIV/0!	#N/A	#N/A		#DIV/0!		2
																						#DIV/0!	#N/A	#N/A		#DIV/0!		2
																						#DIV/0!	#N/A	#N/A		#DIV/0!		2
																						#DIV/0!	#N/A	#N/A		#DIV/0!		2
																						#DIV/0!	#N/A	#N/A		#DIV/0!		2
																						#DIV/0!	#N/A	#N/A		#DIV/0!		2
																						#DIV/0!	#N/A	#N/A		#DIV/0!		2
																						#DIV/0!	#N/A	#N/A		#DIV/0!		2
																						#DIV/0!	#N/A	#N/A		#DIV/0!		2
																						#DIV/0!	#N/A	#N/A		#DIV/0!		2
																						#DIV/0!	#N/A	#N/A		#DIV/0!		2
																						#DIV/0!	#N/A	#N/A		#DIV/0!		2
																						#DIV/0!	#N/A	#N/A		#DIV/0!		2
																						#DIV/0!	#N/A	#N/A		#DIV/0!		2
																						#DIV/0!	#N/A	#N/A		#DIV/0!		2
																						#DIV/0!	#N/A	#N/A		#DIV/0!		2
																						#DIV/0!	#N/A	#N/A		#DIV/0!		2
																						#DIV/0!	#N/A	#N/A		#DIV/0!		2
																						#DIV/0!	#N/A	#N/A		#DIV/0!		2
																						#DIV/0!	#N/A	#N/A		#DIV/0!		2
																						#DIV/0!	#N/A	#N/A		#DIV/0!		2
																						#DIV/0!	#N/A	#N/A		#DIV/0!		2
																						#DIV/0!	#N/A	#N/A		#DIV/0!		2
																						#DIV/0!	#N/A	#N/A		#DIV/0!		2
																						#DIV/0!	#N/A	#N/A		#DIV/0!		2
																						#DIV/0!	#N/A	#N/A		#DIV/0!		2
																						#DIV/0!	#N/A	#N/A		#DIV/0!		2
																						#DIV/0!	#N/A	#N/A		#DIV/0!		2
																						#DIV/0!	#N/A	#N/A		#DIV/0!		2
																						#DIV/0!	#N/A	#N/A		#DIV/0!		2
																						#DIV/0!	#N/A	#N/A		#DIV/0!		2
																						#DIV/0!	#N/A	#N/A		#DIV/0!		2
																						#DIV/0!	#N/A	#N/A		#DIV/0!		2
																						#DIV/0!	#N/A	#N/A		#DIV/0!		2
																						#DIV/0!	#N/A	#N/A		#DIV/0!		2
																						#DIV/0!	#N/A	#N/A		#DIV/0!		2
																						#DIV/0!	#N/A	#N/A		#DIV/0!		2
																						#DIV/0!	#N/A	#N/A		#DIV/0!		2
																						#DIV/0!	#N/A	#N/A		#DIV/0!		2
																						#DIV/0!	#N/A	#N/A		#DIV/0!		2
																						#DIV/0!	#N/A	#N/A		#DIV/0!		2
																						#DIV/0!	#N/A	#N/A		#DIV/0!		2
																						#DIV/0!	#N/A	#N/A		#DIV/0!		2
																						#DIV/0!	#N/A	#N/A		#DIV/0!		2
																						#DIV/0!	#N/A	#N/A		#DIV/0!		2
																						#DIV/0!	#N/A	#N/A		#DIV/0!		2
																						#DIV/0!	#N/A	#N/A		#DIV/0!		2
																						#DIV/0!	#N/A	#N/A		#DIV/0!		2
																						#DIV/0!	#N/A	#N/A		#DIV/0!		2
																						#DIV/0!	#N/A	#N/A		#DIV/0!		2
																						#DIV/0!	#N/A	#N/A		#DIV/0!		2
																						#DIV/0!	#N/A	#N/A		#DIV/0!		2
																						#DIV/0!	#N/A	#N/A		#DIV/0!		2
																						#DIV/0!	#N/A	#N/A		#DIV/0!		2
																						#DIV/0!	#N/A	#N/A		#DIV/0!		2
																						#DIV/0!	#N/A	#N/A		#DIV/0!		2
																						#DIV/0!	#N/A	#N/A		#DIV/0!		2
																						#DIV/0!	#N/A	#N/A		#DIV/0!		2
																						#DIV/0!	#N/A	#N/A		#DIV/0!		2
																						#DIV/0!	#N/A	#N/A		#DIV/0!		2
																						#DIV/0!	#N/A	#N/A		#DIV/0!		2
																						#DIV/0!	#N/A	#N/A		#DIV/0!		2
																						#DIV/0!	#N/A	#N/A		#DIV/0!		2
																						#DIV/0!	#N/A	#N/A		#DIV/0!		2
																						#DIV/0!	#N/A	#N/A		#DIV/0!		2
																						#DIV/0!	#N/A	#N/A		#DIV/0!		2
																						#DIV/0!	#N/A	#N/A		#DIV/0!		2
																						#DIV/0!	#N/A	#N/A		#DIV/0!		2
																						#DIV/0!	#N/A	#N/A		#DIV/0!		2
																						#DIV/0!	#N/A	#N/A		#DIV/0!		2
																						#DIV/0!	#N/A	#N/A		#DIV/0!		2
																						#DIV/0!	#N/A	#N/A		#DIV/0!		2
																						#DIV/0!	#N/A	#N/A		#DIV/0!		2
																						#DIV/0!	#N/A	#N/A		#DIV/0!		2
																						#DIV/0!	#N/A	#N/A		#DIV/0!		2
																						#DIV/0!	#N/A	#N/A		#DIV/0!		2
																						#DIV/0!	#N/A	#N/A		#DIV/0!		2
																						#DIV/0!	#N/A	#N/A		#DIV/0!		2
																						#DIV/0!	#N/A	#N/A		#DIV/0!		2
																						#DIV/0!	#N/A	#N/A		#DIV/0!		2
																						#DIV/0!	#N/A	#N/A		#DIV/0!		2
																						#DIV/0!	#N/A	#N/A		#DIV/0!		2
																						#DIV/0!	#N/A	#N/A		#DIV/0!		2
																						#DIV/0!	#N/A	#N/A		#DIV/0!		2
																						#DIV/0!	#N/A	#N/A		#DIV/0!		2
																						#DIV/0!	#N/A	#N/A		#DIV/0!		2
																						#DIV/0!	#N/A	#N/A		#DIV/0!		2
																						#DIV/0!	#N/A	#N/A		#DIV/0!		2
																						#DIV/0!	#N/A	#N/A		#DIV/0!		2
																						#DIV/0!	#N/A	#N/A		#DIV/0!		2
																						#DIV/0!	#N/A	#N/A		#DIV/0!		2
																						#DIV/0!	#N/A	#N/A		#DIV/0!		2
																						#DIV/0!	#N/A	#N/A		#DIV/0!		2
																						#DIV/0!	#N/A	#N/A		#DIV/0!		2
																						#DIV/0!	#N/A	#N/A		#DIV/0!		2
																						#DIV/0!	#N/A	#N/A		#DIV/0!		2
																						#DIV/0!	#N/A	#N/A		#DIV/0!		2
																						#DIV/0!	#N/A	#N/A		#DIV/0!		2
																						#DIV/0!	#N/A	#N/A		#DIV/0!		2
																						#DIV/0!	#N/A	#N/A		#DIV/0!		2
																						#DIV/0!	#N/A	#N/A		#DIV/0!		2
																						#DIV/0!	#N/A	#N/A		#DIV/0!		2
																						#DIV/0!	#N/A	#N/A		#DIV/0!		2
																						#DIV/0!	#N/A	#N/A		#DIV/0!		2
																						#DIV/0!	#N/A	#N/A		#DIV/0!		2
																						#DIV/0!	#N/A	#N/A		#DIV/0!		2
																						#DIV/0!	#N/A	#N/A		#DIV/0!		2
																						#DIV/0!	#N/A	#N/A		#DIV/0!		2
																						#DIV/0!	#N/A	#N/A		#DIV/0!		2
																						#DIV/0!	#N/A	#N/A		#DIV/0!		2
																						#DIV/0!	#N/A	#N/A		#DIV/0!		2
																						#DIV/0!	#N/A	#N/A		#DIV/0!		2
																						#DIV/0!	#N/A	#N/A		#DIV/0!		2
																						#DIV/0!	#N/A	#N/A		#DIV/0!		2
																						#DIV/0!	#N/A	#N/A		#DIV/0!		2
																						#DIV/0!	#N/A	#N/A		#DIV/0!		2
																						#DIV/0!	#N/A	#N/A		#DIV/0!		2
[truncated: 54 more columns]

## Sheet: Uncompetitive
																							Calculated values
		No Inhibitor	[I]1	[I]2	[I]3	[I]4	[I]5	[I]6	[I]7	[I]8	[I]9	[I]10	[I]11	[I]12	[I]13	[I]14	[I]15						No Inhibitor	[I]1	[I]2	[I]3	[I]4	[I]5	[I]6	[I]7	[I]8	[I]9	[I]10	[I]11	[I]12	[I]13	[I]14	[I]15
		0	5	10	15	20	25	0	0	0	0	0	0	0	0	0	0		Km	Vmax	Ki		0	5	10	15	20	25	0	0	0	0	0	0	0	0	0	0
[S]1	1.5	0.31	0.28	0.26	0.25	0.23	0.22	0	0	0	0	0	0	0	0	0	0		3.4186	0.954733	30.4148		0.29116	0.27726	0.264626	0.253094	0.242525	0.232803	#DIV/0!	#DIV/0!	#DIV/0!	#DIV/0!	#DIV/0!	#DIV/0!	#DIV/0!	#DIV/0!	#DIV/0!	#DIV/0!		0.29116	0.27726	0.264626	0.253094	0.242525	0.232803	0	0	0	0
[S]2	2	0.37	0.33	0.31	0.29	0.28	0.27	0	0	0	0	0	0	0	0	0	0						0.352391	0.332232	0.314255	0.298123	0.283566	0.270365	#DIV/0!	#DIV/0!	#DIV/0!	#DIV/0!	#DIV/0!	#DIV/0!	#DIV/0!	#DIV/0!	#DIV/0!	#DIV/0!		0.352391	0.332232	0.314255	0.298123	0.283566	0.270365	0	0	0	0
[S]3	3	0.45	0.41	0.38	0.36	0.34	0.33	0	0	0	0	0	0	0	0	0	0						0.446234	0.414394	0.386794	0.362642	0.341329	0.322381	#DIV/0!	#DIV/0!	#DIV/0!	#DIV/0!	#DIV/0!	#DIV/0!	#DIV/0!	#DIV/0!	#DIV/0!	#DIV/0!		0.446234	0.414394	0.386794	0.362642	0.341329	0.322381	0	0	0	0
[S]4	4	0.51	0.47	0.43	0.41	0.39	0.37	0	0	0	0	0	0	0	0	0	0						0.514778	0.472864	0.437261	0.406645	0.380035	0.356694	#DIV/0!	#DIV/0!	#DIV/0!	#DIV/0!	#DIV/0!	#DIV/0!	#DIV/0!	#DIV/0!	#DIV/0!	#DIV/0!		0.514778	0.472864	0.437261	0.406645	0.380035	0.356694	0	0	0	0
[S]5	0	0	0	0	0	0	0	0	0	0	0	0	0	0	0	0	0						#DIV/0!	#DIV/0!	#DIV/0!	#DIV/0!	#DIV/0!	#DIV/0!	#DIV/0!	#DIV/0!	#DIV/0!	#DIV/0!	#DIV/0!	#DIV/0!	#DIV/0!	#DIV/0!	#DIV/0!	#DIV/0!		0	0	0	0	0	0	0	0	0	0
[S]6	0	0	0	0	0	0	0	0	0	0	0	0	0	0	0	0	0			Sum R2	0.00164403		#DIV/0!	#DIV/0!	#DIV/0!	#DIV/0!	#DIV/0!	#DIV/0!	#DIV/0!	#DIV/0!	#DIV/0!	#DIV/0!	#DIV/0!	#DIV/0!	#DIV/0!	#DIV/0!	#DIV/0!	#DIV/0!		0	0	0	0	0	0	0	0	0	0
[S]7	0	0	0	0	0	0	0	0	0	0	0	0	0	0	0	0	0			Sum residuals %	0.497477		#DIV/0!	#DIV/0!	#DIV/0!	#DIV/0!	#DIV/0!	#DIV/0!	#DIV/0!	#DIV/0!	#DIV/0!	#DIV/0!	#DIV/0!	#DIV/0!	#DIV/0!	#DIV/0!	#DIV/0!	#DIV/0!		0	0	0	0	0	0	0	0	0	0
[S]8	0	0	0	0	0	0	0	0	0	0	0	0	0	0	0	0	0						#DIV/0!	#DIV/0!	#DIV/0!	#DIV/0!	#DIV/0!	#DIV/0!	#DIV/0!	#DIV/0!	#DIV/0!	#DIV/0!	#DIV/0!	#DIV/0!	#DIV/0!	#DIV/0!	#DIV/0!	#DIV/0!		0	0	0	0	0	0	0	0	0	0
[S]9	0	0	0	0	0	0	0	0	0	0	0	0	0	0	0	0	0						#DIV/0!	#DIV/0!	#DIV/0!	#DIV/0!	#DIV/0!	#DIV/0!	#DIV/0!	#DIV/0!	#DIV/0!	#DIV/0!	#DIV/0!	#DIV/0!	#DIV/0!	#DIV/0!	#DIV/0!	#DIV/0!		0	0	0	0	0	0	0	0	0	0
[S]10	0	0	0	0	0	0	0	0	0	0	0	0	0	0	0	0	0						#DIV/0!	#DIV/0!	#DIV/0!	#DIV/0!	#DIV/0!	#DIV/0!	#DIV/0!	#DIV/0!	#DIV/0!	#DIV/0!	#DIV/0!	#DIV/0!	#DIV/0!	#DIV/0!	#DIV/0!	#DIV/0!		0	0	0	0	0	0	0	0	0	0
[S]11	0	0	0	0	0	0	0	0	0	0	0	0	0	0	0	0	0						#DIV/0!	#DIV/0!	#DIV/0!	#DIV/0!	#DIV/0!	#DIV/0!	#DIV/0!	#DIV/0!	#DIV/0!	#DIV/0!	#DIV/0!	#DIV/0!	#DIV/0!	#DIV/0!	#DIV/0!	#DIV/0!		0	0	0	0	0	0	0	0	0	0
[S]12	0	0	0	0	0	0	0	0	0	0	0	0	0	0	0	0	0						#DIV/0!	#DIV/0!	#DIV/0!	#DIV/0!	#DIV/0!	#DIV/0!	#DIV/0!	#DIV/0!	#DIV/0!	#DIV/0!	#DIV/0!	#DIV/0!	#DIV/0!	#DIV/0!	#DIV/0!	#DIV/0!		0	0	0	0	0	0	0	0	0	0
[S]13	0	0	0	0	0	0	0	0	0	0	0	0	0	0	0	0	0						#DIV/0!	#DIV/0!	#DIV/0!	#DIV/0!	#DIV/0!	#DIV/0!	#DIV/0!	#DIV/0!	#DIV/0!	#DIV/0!	#DIV/0!	#DIV/0!	#DIV/0!	#DIV/0!	#DIV/0!	#DIV/0!		0	0	0	0	0	0	0	0	0	0
[S]14	0	0	0	0	0	0	0	0	0	0	0	0	0	0	0	0	0						#DIV/0!	#DIV/0!	#DIV/0!	#DIV/0!	#DIV/0!	#DIV/0!	#DIV/0!	#DIV/0!	#DIV/0!	#DIV/0!	#DIV/0!	#DIV/0!	#DIV/0!	#DIV/0!	#DIV/0!	#DIV/0!		0	0	0	0	0	0	0	0	0	0
[S]15	0	0	0	0	0	0	0	0	0	0	0	0	0	0	0	0	0						#DIV/0!	#DIV/0!	#DIV/0!	#DIV/0!	#DIV/0!	#DIV/0!	#DIV/0!	#DIV/0!	#DIV/0!	#DIV/0!	#DIV/0!	#DIV/0!	#DIV/0!	#DIV/0!	#DIV/0!	#DIV/0!		0	0	0	0	0	0	0	0	0	0
	1	1	1	1	1	1	1	#DIV/0!	#DIV/0!	#DIV/0!	#DIV/0!	#DIV/0!	#DIV/0!	#DIV/0!	#DIV/0!	#DIV/0!	#DIV/0!																					1.5	1.5	0.29116	0.27726	0.264626	0.253094	0.242525	0.232803	#N/A	#N/A	#N/A	#N/A
	1	1	1	1	1	1	1	#DIV/0!	#DIV/0!	#DIV/0!	#DIV/0!	#DIV/0!	#DIV/0!	#DIV/0!	#DIV/0!	#DIV/0!	#DIV/0!					0.31	0.31	0.29116		-0.0188401	-0.0188401	3										2	2	0.352391	0.332232	0.314255	0.298123	0.283566	0.270365	#N/A	#N/A	#N/A	#N/A
	1	1	1	1	1	1	1	#DIV/0!	#DIV/0!	#DIV/0!	#DIV/0!	#DIV/0!	#DIV/0!	#DIV/0!	#DIV/0!	#DIV/0!	#DIV/0!					0.37	0.37	0.352391		-0.0176091	-0.0176091	3										3	3	0.446234	0.414394	0.386794	0.362642	0.341329	0.322381	#N/A	#N/A	#N/A	#N/A
	1	1	1	1	1	1	1	#DIV/0!	#DIV/0!	#DIV/0!	#DIV/0!	#DIV/0!	#DIV/0!	#DIV/0!	#DIV/0!	#DIV/0!	#DIV/0!					0.45	0.45	0.446234		-0.00376592	-0.00376592	3										4	4	0.514778	0.472864	0.437261	0.406645	0.380035	0.356694	#N/A	#N/A	#N/A	#N/A
	#DIV/0!	#DIV/0!	#DIV/0!	#DIV/0!	#DIV/0!	#DIV/0!	#DIV/0!	#DIV/0!	#DIV/0!	#DIV/0!	#DIV/0!	#DIV/0!	#DIV/0!	#DIV/0!	#DIV/0!	#DIV/0!	#DIV/0!					0.51	0.51	0.514778		0.00477783	0.00477783	3										#DIV/0!	#N/A	#N/A	#N/A	#N/A	#N/A	#N/A	#N/A	#N/A	#N/A	#N/A	#N/A
	#DIV/0!	#DIV/0!	#DIV/0!	#DIV/0!	#DIV/0!	#DIV/0!	#DIV/0!	#DIV/0!	#DIV/0!	#DIV/0!	#DIV/0!	#DIV/0!	#DIV/0!	#DIV/0!	#DIV/0!	#DIV/0!	#DIV/0!					#DIV/0!	#N/A	#N/A		#DIV/0!		3										#DIV/0!	#N/A	#N/A	#N/A	#N/A	#N/A	#N/A	#N/A	#N/A	#N/A	#N/A	#N/A
	#DIV/0!	#DIV/0!	#DIV/0!	#DIV/0!	#DIV/0!	#DIV/0!	#DIV/0!	#DIV/0!	#DIV/0!	#DIV/0!	#DIV/0!	#DIV/0!	#DIV/0!	#DIV/0!	#DIV/0!	#DIV/0!	#DIV/0!					#DIV/0!	#N/A	#N/A		#DIV/0!		3										#DIV/0!	#N/A	#N/A	#N/A	#N/A	#N/A	#N/A	#N/A	#N/A	#N/A	#N/A	#N/A
	#DIV/0!	#DIV/0!	#DIV/0!	#DIV/0!	#DIV/0!	#DIV/0!	#DIV/0!	#DIV/0!	#DIV/0!	#DIV/0!	#DIV/0!	#DIV/0!	#DIV/0!	#DIV/0!	#DIV/0!	#DIV/0!	#DIV/0!					#DIV/0!	#N/A	#N/A		#DIV/0!		3										#DIV/0!	#N/A	#N/A	#N/A	#N/A	#N/A	#N/A	#N/A	#N/A	#N/A	#N/A	#N/A
	#DIV/0!	#DIV/0!	#DIV/0!	#DIV/0!	#DIV/0!	#DIV/0!	#DIV/0!	#DIV/0!	#DIV/0!	#DIV/0!	#DIV/0!	#DIV/0!	#DIV/0!	#DIV/0!	#DIV/0!	#DIV/0!	#DIV/0!					#DIV/0!	#N/A	#N/A		#DIV/0!		3										#DIV/0!	#N/A	#N/A	#N/A	#N/A	#N/A	#N/A	#N/A	#N/A	#N/A	#N/A	#N/A
	#DIV/0!	#DIV/0!	#DIV/0!	#DIV/0!	#DIV/0!	#DIV/0!	#DIV/0!	#DIV/0!	#DIV/0!	#DIV/0!	#DIV/0!	#DIV/0!	#DIV/0!	#DIV/0!	#DIV/0!	#DIV/0!	#DIV/0!					#DIV/0!	#N/A	#N/A		#DIV/0!		3										#DIV/0!	#N/A	#N/A	#N/A	#N/A	#N/A	#N/A	#N/A	#N/A	#N/A	#N/A	#N/A
	#DIV/0!	#DIV/0!	#DIV/0!	#DIV/0!	#DIV/0!	#DIV/0!	#DIV/0!	#DIV/0!	#DIV/0!	#DIV/0!	#DIV/0!	#DIV/0!	#DIV/0!	#DIV/0!	#DIV/0!	#DIV/0!	#DIV/0!					#DIV/0!	#N/A	#N/A		#DIV/0!		3										#DIV/0!	#N/A	#N/A	#N/A	#N/A	#N/A	#N/A	#N/A	#N/A	#N/A	#N/A	#N/A
	#DIV/0!	#DIV/0!	#DIV/0!	#DIV/0!	#DIV/0!	#DIV/0!	#DIV/0!	#DIV/0!	#DIV/0!	#DIV/0!	#DIV/0!	#DIV/0!	#DIV/0!	#DIV/0!	#DIV/0!	#DIV/0!	#DIV/0!					#DIV/0!	#N/A	#N/A		#DIV/0!		3										#DIV/0!	#N/A	#N/A	#N/A	#N/A	#N/A	#N/A	#N/A	#N/A	#N/A	#N/A	#N/A
	#DIV/0!	#DIV/0!	#DIV/0!	#DIV/0!	#DIV/0!	#DIV/0!	#DIV/0!	#DIV/0!	#DIV/0!	#DIV/0!	#DIV/0!	#DIV/0!	#DIV/0!	#DIV/0!	#DIV/0!	#DIV/0!	#DIV/0!					#DIV/0!	#N/A	#N/A		#DIV/0!		3										#DIV/0!	#N/A	#N/A	#N/A	#N/A	#N/A	#N/A	#N/A	#N/A	#N/A	#N/A	#N/A
	#DIV/0!	#DIV/0!	#DIV/0!	#DIV/0!	#DIV/0!	#DIV/0!	#DIV/0!	#DIV/0!	#DIV/0!	#DIV/0!	#DIV/0!	#DIV/0!	#DIV/0!	#DIV/0!	#DIV/0!	#DIV/0!	#DIV/0!					#DIV/0!	#N/A	#N/A		#DIV/0!		3										#DIV/0!	#N/A	#N/A	#N/A	#N/A	#N/A	#N/A	#N/A	#N/A	#N/A	#N/A	#N/A
	#DIV/0!	#DIV/0!	#DIV/0!	#DIV/0!	#DIV/0!	#DIV/0!	#DIV/0!	#DIV/0!	#DIV/0!	#DIV/0!	#DIV/0!	#DIV/0!	#DIV/0!	#DIV/0!	#DIV/0!	#DIV/0!	#DIV/0!					#DIV/0!	#N/A	#N/A		#DIV/0!		3										#DIV/0!	#N/A	#N/A	#N/A	#N/A	#N/A	#N/A	#N/A	#N/A	#N/A	#N/A	#N/A
																						#DIV/0!	#N/A	#N/A		#DIV/0!		3
																						0.28	0.28	0.27726		-0.00274033	-0.00274033	3											0.666667	3.43454	3.60673	3.77892	3.9511	4.12329	4.29548	#N/A	#N/A	#N/A	#N/A
																						0.33	0.33	0.332232		0.0022319	0.0022319	3											0.5	2.83776	3.00995	3.18213	3.35432	3.52651	3.6987	#N/A	#N/A	#N/A	#N/A
																						0.41	0.41	0.414394		0.00439366	0.00439366	3											0.333333	2.24098	2.41316	2.58535	2.75754	2.92973	3.10192	#N/A	#N/A	#N/A	#N/A
																						0.47	0.47	0.472864		0.00286386	0.00286386	3											0.25	1.94259	2.11477	2.28696	2.45915	2.63134	2.80353	#N/A	#N/A	#N/A	#N/A
																						#DIV/0!	#N/A	#N/A		#DIV/0!		3											#N/A	#N/A	#N/A	#N/A	#N/A	#N/A	#N/A	#N/A	#N/A	#N/A	#N/A
																						#DIV/0!	#N/A	#N/A		#DIV/0!		3											#N/A	#N/A	#N/A	#N/A	#N/A	#N/A	#N/A	#N/A	#N/A	#N/A	#N/A
																						#DIV/0!	#N/A	#N/A		#DIV/0!		3											#N/A	#N/A	#N/A	#N/A	#N/A	#N/A	#N/A	#N/A	#N/A	#N/A	#N/A
																						#DIV/0!	#N/A	#N/A		#DIV/0!		3											#N/A	#N/A	#N/A	#N/A	#N/A	#N/A	#N/A	#N/A	#N/A	#N/A	#N/A
																						#DIV/0!	#N/A	#N/A		#DIV/0!		3											#N/A	#N/A	#N/A	#N/A	#N/A	#N/A	#N/A	#N/A	#N/A	#N/A	#N/A
																						#DIV/0!	#N/A	#N/A		#DIV/0!		3											#N/A	#N/A	#N/A	#N/A	#N/A	#N/A	#N/A	#N/A	#N/A	#N/A	#N/A
																						#DIV/0!	#N/A	#N/A		#DIV/0!		3											#N/A	#N/A	#N/A	#N/A	#N/A	#N/A	#N/A	#N/A	#N/A	#N/A	#N/A
																						#DIV/0!	#N/A	#N/A		#DIV/0!		3											#N/A	#N/A	#N/A	#N/A	#N/A	#N/A	#N/A	#N/A	#N/A	#N/A	#N/A
																						#DIV/0!	#N/A	#N/A		#DIV/0!		3											#N/A	#N/A	#N/A	#N/A	#N/A	#N/A	#N/A	#N/A	#N/A	#N/A	#N/A
																						#DIV/0!	#N/A	#N/A		#DIV/0!		3											#N/A	#N/A	#N/A	#N/A	#N/A	#N/A	#N/A	#N/A	#N/A	#N/A	#N/A
																						#DIV/0!	#N/A	#N/A		#DIV/0!		3											#N/A	#N/A	#N/A	#N/A	#N/A	#N/A	#N/A	#N/A	#N/A	#N/A	#N/A
																						0.26	0.26	0.264626		0.00462621	0.00462621	3
																						0.31	0.31	0.314255		0.00425455	0.00425455	3												0.31	0.28	0.26	0.25	0.23	0.22	#DIV/0!	#DIV/0!	#DIV/0!	#DIV/0!
																						0.38	0.38	0.386794		0.00679448	0.00679448	3												0.37	0.33	0.31	0.29	0.28	0.27	#DIV/0!	#DIV/0!	#DIV/0!	#DIV/0!
																						0.43	0.43	0.437261		0.00726139	0.00726139	3												0.45	0.41	0.38	0.36	0.34	0.33	#DIV/0!	#DIV/0!	#DIV/0!	#DIV/0!
																						#DIV/0!	#N/A	#N/A		#DIV/0!		3												0.51	0.47	0.43	0.41	0.39	0.37	#DIV/0!	#DIV/0!	#DIV/0!	#DIV/0!
																						#DIV/0!	#N/A	#N/A		#DIV/0!		3												#DIV/0!	#DIV/0!	#DIV/0!	#DIV/0!	#DIV/0!	#DIV/0!	#DIV/0!	#DIV/0!	#DIV/0!	#DIV/0!
																						#DIV/0!	#N/A	#N/A		#DIV/0!		3												#DIV/0!	#DIV/0!	#DIV/0!	#DIV/0!	#DIV/0!	#DIV/0!	#DIV/0!	#DIV/0!	#DIV/0!	#DIV/0!
																						#DIV/0!	#N/A	#N/A		#DIV/0!		3												#DIV/0!	#DIV/0!	#DIV/0!	#DIV/0!	#DIV/0!	#DIV/0!	#DIV/0!	#DIV/0!	#DIV/0!	#DIV/0!
																						#DIV/0!	#N/A	#N/A		#DIV/0!		3												#DIV/0!	#DIV/0!	#DIV/0!	#DIV/0!	#DIV/0!	#DIV/0!	#DIV/0!	#DIV/0!	#DIV/0!	#DIV/0!
																						#DIV/0!	#N/A	#N/A		#DIV/0!		3												#DIV/0!	#DIV/0!	#DIV/0!	#DIV/0!	#DIV/0!	#DIV/0!	#DIV/0!	#DIV/0!	#DIV/0!	#DIV/0!
																						#DIV/0!	#N/A	#N/A		#DIV/0!		3												#DIV/0!	#DIV/0!	#DIV/0!	#DIV/0!	#DIV/0!	#DIV/0!	#DIV/0!	#DIV/0!	#DIV/0!	#DIV/0!
																						#DIV/0!	#N/A	#N/A		#DIV/0!		3												#DIV/0!	#DIV/0!	#DIV/0!	#DIV/0!	#DIV/0!	#DIV/0!	#DIV/0!	#DIV/0!	#DIV/0!	#DIV/0!
																						#DIV/0!	#N/A	#N/A		#DIV/0!		3												#DIV/0!	#DIV/0!	#DIV/0!	#DIV/0!	#DIV/0!	#DIV/0!	#DIV/0!	#DIV/0!	#DIV/0!	#DIV/0!
																						#DIV/0!	#N/A	#N/A		#DIV/0!		3												#DIV/0!	#DIV/0!	#DIV/0!	#DIV/0!	#DIV/0!	#DIV/0!	#DIV/0!	#DIV/0!	#DIV/0!	#DIV/0!
																						#DIV/0!	#N/A	#N/A		#DIV/0!		3												#DIV/0!	#DIV/0!	#DIV/0!	#DIV/0!	#DIV/0!	#DIV/0!	#DIV/0!	#DIV/0!	#DIV/0!	#DIV/0!
																						0.25	0.25	0.253094		0.00309387	0.00309387	3												#DIV/0!	#DIV/0!	#DIV/0!	#DIV/0!	#DIV/0!	#DIV/0!	#DIV/0!	#DIV/0!	#DIV/0!	#DIV/0!
																						0.29	0.29	0.298123		0.00812286	0.00812286	3
																						0.36	0.36	0.362642		0.00264203	0.00264203	3												1/s	0	5	10	15	20	25	0	0	0
																						0.41	0.41	0.406645		-0.00335536	-0.00335536	3											1	0.666667	3.43454	3.60673	3.77892	3.9511	4.12329	4.29548	#N/A	#N/A	#N/A
																						#DIV/0!	#N/A	#N/A		#DIV/0!		3											2	0.5	2.83776	3.00995	3.18213	3.35432	3.52651	3.6987	#N/A	#N/A	#N/A
																						#DIV/0!	#N/A	#N/A		#DIV/0!		3											3	0.333333	2.24098	2.41316	2.58535	2.75754	2.92973	3.10192	#N/A	#N/A	#N/A
																						#DIV/0!	#N/A	#N/A		#DIV/0!		3											4	0.25	1.94259	2.11477	2.28696	2.45915	2.63134	2.80353	#N/A	#N/A	#N/A
																						#DIV/0!	#N/A	#N/A		#DIV/0!		3											5	#N/A	#N/A	#N/A	#N/A	#N/A	#N/A	#N/A	#N/A	#N/A	#N/A
																						#DIV/0!	#N/A	#N/A		#DIV/0!		3											6	#N/A	#N/A	#N/A	#N/A	#N/A	#N/A	#N/A	#N/A	#N/A	#N/A
																						#DIV/0!	#N/A	#N/A		#DIV/0!		3											7	#N/A	#N/A	#N/A	#N/A	#N/A	#N/A	#N/A	#N/A	#N/A	#N/A
																						#DIV/0!	#N/A	#N/A		#DIV/0!		3											8	#N/A	#N/A	#N/A	#N/A	#N/A	#N/A	#N/A	#N/A	#N/A	#N/A
																						#DIV/0!	#N/A	#N/A		#DIV/0!		3											9	#N/A	#N/A	#N/A	#N/A	#N/A	#N/A	#N/A	#N/A	#N/A	#N/A
																						#DIV/0!	#N/A	#N/A		#DIV/0!		3											10	#N/A	#N/A	#N/A	#N/A	#N/A	#N/A	#N/A	#N/A	#N/A	#N/A
																						#DIV/0!	#N/A	#N/A		#DIV/0!		3											11	#N/A	#N/A	#N/A	#N/A	#N/A	#N/A	#N/A	#N/A	#N/A	#N/A
																						#DIV/0!	#N/A	#N/A		#DIV/0!		3											12	#N/A	#N/A	#N/A	#N/A	#N/A	#N/A	#N/A	#N/A	#N/A	#N/A
																						0.23	0.23	0.242525		0.0125247	0.0125247	3											13	#N/A	#N/A	#N/A	#N/A	#N/A	#N/A	#N/A	#N/A	#N/A	#N/A
																						0.28	0.28	0.283566		0.00356649	0.00356649	3											14	#N/A	#N/A	#N/A	#N/A	#N/A	#N/A	#N/A	#N/A	#N/A	#N/A
																						0.34	0.34	0.341329		0.00132858	0.00132858	3											15	#N/A	#N/A	#N/A	#N/A	#N/A	#N/A	#N/A	#N/A	#N/A	#N/A
																						0.39	0.39	0.380035		-0.00996514	-0.00996514	3
																						#DIV/0!	#N/A	#N/A		#DIV/0!		3
																						#DIV/0!	#N/A	#N/A		#DIV/0!		3
																						#DIV/0!	#N/A	#N/A		#DIV/0!		3
																						#DIV/0!	#N/A	#N/A		#DIV/0!		3
																						#DIV/0!	#N/A	#N/A		#DIV/0!		3
																						#DIV/0!	#N/A	#N/A		#DIV/0!		3
																						#DIV/0!	#N/A	#N/A		#DIV/0!		3
																						#DIV/0!	#N/A	#N/A		#DIV/0!		3
																						#DIV/0!	#N/A	#N/A		#DIV/0!		3
																						#DIV/0!	#N/A	#N/A		#DIV/0!		3
																						#DIV/0!	#N/A	#N/A		#DIV/0!		3
																						0.22	0.22	0.232803		0.0128029	0.0128029	3
																						0.27	0.27	0.270365		0.000365431	0.000365431	3
																						0.33	0.33	0.322381		-0.00761864	-0.00761864	3
																						0.37	0.37	0.356694		-0.0133063	-0.0133063	3
																						#DIV/0!	#N/A	#N/A		#DIV/0!		3
																						#DIV/0!	#N/A	#N/A		#DIV/0!		3
																						#DIV/0!	#N/A	#N/A		#DIV/0!		3
																						#DIV/0!	#N/A	#N/A		#DIV/0!		3
																						#DIV/0!	#N/A	#N/A		#DIV/0!		3
																						#DIV/0!	#N/A	#N/A		#DIV/0!		3
																						#DIV/0!	#N/A	#N/A		#DIV/0!		3
																						#DIV/0!	#N/A	#N/A		#DIV/0!		3
																						#DIV/0!	#N/A	#N/A		#DIV/0!		3
																						#DIV/0!	#N/A	#N/A		#DIV/0!		3
																						#DIV/0!	#N/A	#N/A		#DIV/0!		3
																						#DIV/0!	#N/A	#N/A		#DIV/0!		3
																						#DIV/0!	#N/A	#N/A		#DIV/0!		3
																						#DIV/0!	#N/A	#N/A		#DIV/0!		3
																						#DIV/0!	#N/A	#N/A		#DIV/0!		3
																						#DIV/0!	#N/A	#N/A		#DIV/0!		3
																						#DIV/0!	#N/A	#N/A		#DIV/0!		3
																						#DIV/0!	#N/A	#N/A		#DIV/0!		3
																						#DIV/0!	#N/A	#N/A		#DIV/0!		3
																						#DIV/0!	#N/A	#N/A		#DIV/0!		3
																						#DIV/0!	#N/A	#N/A		#DIV/0!		3
																						#DIV/0!	#N/A	#N/A		#DIV/0!		3
																						#DIV/0!	#N/A	#N/A		#DIV/0!		3
																						#DIV/0!	#N/A	#N/A		#DIV/0!		3
																						#DIV/0!	#N/A	#N/A		#DIV/0!		3
																						#DIV/0!	#N/A	#N/A		#DIV/0!		3
																						#DIV/0!	#N/A	#N/A		#DIV/0!		3
																						#DIV/0!	#N/A	#N/A		#DIV/0!		3
																						#DIV/0!	#N/A	#N/A		#DIV/0!		3
																						#DIV/0!	#N/A	#N/A		#DIV/0!		3
																						#DIV/0!	#N/A	#N/A		#DIV/0!		3
																						#DIV/0!	#N/A	#N/A		#DIV/0!		3
																						#DIV/0!	#N/A	#N/A		#DIV/0!		3
																						#DIV/0!	#N/A	#N/A		#DIV/0!		3
																						#DIV/0!	#N/A	#N/A		#DIV/0!		3
																						#DIV/0!	#N/A	#N/A		#DIV/0!		3
																						#DIV/0!	#N/A	#N/A		#DIV/0!		3
																						#DIV/0!	#N/A	#N/A		#DIV/0!		3
																						#DIV/0!	#N/A	#N/A		#DIV/0!		3
																						#DIV/0!	#N/A	#N/A		#DIV/0!		3
																						#DIV/0!	#N/A	#N/A		#DIV/0!		3
																						#DIV/0!	#N/A	#N/A		#DIV/0!		3
																						#DIV/0!	#N/A	#N/A		#DIV/0!		3
																						#DIV/0!	#N/A	#N/A		#DIV/0!		3
																						#DIV/0!	#N/A	#N/A		#DIV/0!		3
																						#DIV/0!	#N/A	#N/A		#DIV/0!		3
																						#DIV/0!	#N/A	#N/A		#DIV/0!		3
																						#DIV/0!	#N/A	#N/A		#DIV/0!		3
																						#DIV/0!	#N/A	#N/A		#DIV/0!		3
																						#DIV/0!	#N/A	#N/A		#DIV/0!		3
																						#DIV/0!	#N/A	#N/A		#DIV/0!		3
																						#DIV/0!	#N/A	#N/A		#DIV/0!		3
																						#DIV/0!	#N/A	#N/A		#DIV/0!		3
																						#DIV/0!	#N/A	#N/A		#DIV/0!		3
																						#DIV/0!	#N/A	#N/A		#DIV/0!		3
																						#DIV/0!	#N/A	#N/A		#DIV/0!		3
																						#DIV/0!	#N/A	#N/A		#DIV/0!		3
																						#DIV/0!	#N/A	#N/A		#DIV/0!		3
																						#DIV/0!	#N/A	#N/A		#DIV/0!		3
																						#DIV/0!	#N/A	#N/A		#DIV/0!		3
																						#DIV/0!	#N/A	#N/A		#DIV/0!		3
																						#DIV/0!	#N/A	#N/A		#DIV/0!		3
																						#DIV/0!	#N/A	#N/A		#DIV/0!		3
																						#DIV/0!	#N/A	#N/A		#DIV/0!		3
																						#DIV/0!	#N/A	#N/A		#DIV/0!		3
																						#DIV/0!	#N/A	#N/A		#DIV/0!		3
																						#DIV/0!	#N/A	#N/A		#DIV/0!		3
																						#DIV/0!	#N/A	#N/A		#DIV/0!		3
																						#DIV/0!	#N/A	#N/A		#DIV/0!		3
																						#DIV/0!	#N/A	#N/A		#DIV/0!		3
																						#DIV/0!	#N/A	#N/A		#DIV/0!		3
																						#DIV/0!	#N/A	#N/A		#DIV/0!		3
																						#DIV/0!	#N/A	#N/A		#DIV/0!		3
																						#DIV/0!	#N/A	#N/A		#DIV/0!		3
																						#DIV/0!	#N/A	#N/A		#DIV/0!		3
																						#DIV/0!	#N/A	#N/A		#DIV/0!		3
																						#DIV/0!	#N/A	#N/A		#DIV/0!		3
																						#DIV/0!	#N/A	#N/A		#DIV/0!		3
																						#DIV/0!	#N/A	#N/A		#DIV/0!		3
																						#DIV/0!	#N/A	#N/A		#DIV/0!		3
																						#DIV/0!	#N/A	#N/A		#DIV/0!		3
																						#DIV/0!	#N/A	#N/A		#DIV/0!		3
																						#DIV/0!	#N/A	#N/A		#DIV/0!		3
																						#DIV/0!	#N/A	#N/A		#DIV/0!		3
																						#DIV/0!	#N/A	#N/A		#DIV/0!		3
																						#DIV/0!	#N/A	#N/A		#DIV/0!		3
																						#DIV/0!	#N/A	#N/A		#DIV/0!		3
																						#DIV/0!	#N/A	#N/A		#DIV/0!		3
																						#DIV/0!	#N/A	#N/A		#DIV/0!		3
																						#DIV/0!	#N/A	#N/A		#DIV/0!		3
																						#DIV/0!	#N/A	#N/A		#DIV/0!		3
																						#DIV/0!	#N/A	#N/A		#DIV/0!		3
																						#DIV/0!	#N/A	#N/A		#DIV/0!		3
																						#DIV/0!	#N/A	#N/A		#DIV/0!		3
																						#DIV/0!	#N/A	#N/A		#DIV/0!		3
																						#DIV/0!	#N/A	#N/A		#DIV/0!		3
																						#DIV/0!	#N/A	#N/A		#DIV/0!		3
																						#DIV/0!	#N/A	#N/A		#DIV/0!		3
																						#DIV/0!	#N/A	#N/A		#DIV/0!		3
																						#DIV/0!	#N/A	#N/A		#DIV/0!		3
																						#DIV/0!	#N/A	#N/A		#DIV/0!		3
																						#DIV/0!	#N/A	#N/A		#DIV/0!		3
																						#DIV/0!	#N/A	#N/A		#DIV/0!		3
																						#DIV/0!	#N/A	#N/A		#DIV/0!		3
																						#DIV/0!	#N/A	#N/A		#DIV/0!		3
																						#DIV/0!	#N/A	#N/A		#DIV/0!		3
																						#DIV/0!	#N/A	#N/A		#DIV/0!		3
																						#DIV/0!	#N/A	#N/A		#DIV/0!		3
																						#DIV/0!	#N/A	#N/A		#DIV/0!		3
																						#DIV/0!	#N/A	#N/A		#DIV/0!		3
																						#DIV/0!	#N/A	#N/A		#DIV/0!		3
																						#DIV/0!	#N/A	#N/A		#DIV/0!		3
																						#DIV/0!	#N/A	#N/A		#DIV/0!		3
																						#DIV/0!	#N/A	#N/A		#DIV/0!		3
																						#DIV/0!	#N/A	#N/A		#DIV/0!		3
																						#DIV/0!	#N/A	#N/A		#DIV/0!		3
																						#DIV/0!	#N/A	#N/A		#DIV/0!		3
																						#DIV/0!	#N/A	#N/A		#DIV/0!		3
																						#DIV/0!	#N/A	#N/A		#DIV/0!		3
																						#DIV/0!	#N/A	#N/A		#DIV/0!		3
																						#DIV/0!	#N/A	#N/A		#DIV/0!		3
																						#DIV/0!	#N/A	#N/A		#DIV/0!		3
																						#DIV/0!	#N/A	#N/A		#DIV/0!		3
																						#DIV/0!	#N/A	#N/A		#DIV/0!		3
																						#DIV/0!	#N/A	#N/A		#DIV/0!		3
																						#DIV/0!	#N/A	#N/A		#DIV/0!		3
																						#DIV/0!	#N/A	#N/A		#DIV/0!		3
																						#DIV/0!	#N/A	#N/A		#DIV/0!		3
																						#DIV/0!	#N/A	#N/A		#DIV/0!		3
																						#DIV/0!	#N/A	#N/A		#DIV/0!		3
																						#DIV/0!	#N/A	#N/A		#DIV/0!		3
																						#DIV/0!	#N/A	#N/A		#DIV/0!		3
																						#DIV/0!	#N/A	#N/A		#DIV/0!		3
																						#DIV/0!	#N/A	#N/A		#DIV/0!		3
																						#DIV/0!	#N/A	#N/A		#DIV/0!		3
																						#DIV/0!	#N/A	#N/A		#DIV/0!		3
																						#DIV/0!	#N/A	#N/A		#DIV/0!		3
																						#DIV/0!	#N/A	#N/A		#DIV/0!		3
																						#DIV/0!	#N/A	#N/A		#DIV/0!		3
																						#DIV/0!	#N/A	#N/A		#DIV/0!		3
																						#DIV/0!	#N/A	#N/A		#DIV/0!		3
																						#DIV/0!	#N/A	#N/A		#DIV/0!		3
																						#DIV/0!	#N/A	#N/A		#DIV/0!		3
																						#DIV/0!	#N/A	#N/A		#DIV/0!		3
																						#DIV/0!	#N/A	#N/A		#DIV/0!		3
																						#DIV/0!	#N/A	#N/A		#DIV/0!		3
																						#DIV/0!	#N/A	#N/A		#DIV/0!		3
																						#DIV/0!	#N/A	#N/A		#DIV/0!		3
																						#DIV/0!	#N/A	#N/A		#DIV/0!		3
																						#DIV/0!	#N/A	#N/A		#DIV/0!		3
																						#DIV/0!	#N/A	#N/A		#DIV/0!		3
																						#DIV/0!	#N/A	#N/A		#DIV/0!		3
																						#DIV/0!	#N/A	#N/A		#DIV/0!		3
																						#DIV/0!	#N/A	#N/A		#DIV/0!		3
																						#DIV/0!	#N/A	#N/A		#DIV/0!		3
																						#DIV/0!	#N/A	#N/A		#DIV/0!		3
																						#DIV/0!	#N/A	#N/A		#DIV/0!		3
																						#DIV/0!	#N/A	#N/A		#DIV/0!		3
																						#DIV/0!	#N/A	#N/A		#DIV/0!		3
																						#DIV/0!	#N/A	#N/A		#DIV/0!		3
																						#DIV/0!	#N/A	#N/A		#DIV/0!		3
[truncated: 54 more columns]

## Sheet: Mixed Non-competitive
																							Calculated values
		No Inhibitor	[I]1	[I]2	[I]3	[I]4	[I]5	[I]6	[I]7	[I]8	[I]9	[I]10	[I]11	[I]12	[I]13	[I]14	[I]15						No Inhibitor	[I]1	[I]2	[I]3	[I]4	[I]5	[I]6	[I]7	[I]8	[I]9	[I]10	[I]11	[I]12	[I]13	[I]14	[I]15
		0	5	10	15	20	25	0	0	0	0	0	0	0	0	0	0	Km	Vmax	Ki	aKi		0	5	10	15	20	25	0	0	0	0	0	0	0	0	0	0
[S]1	1.5	0.31	0.28	0.26	0.25	0.23	0.22	0	0	0	0	0	0	0	0	0	0	2.5722	0.829003	60.2416	70.6113		0.305364	0.283135	0.263923	0.247153	0.232386	0.219285	#DIV/0!	#DIV/0!	#DIV/0!	#DIV/0!	#DIV/0!	#DIV/0!	#DIV/0!	#DIV/0!	#DIV/0!	#DIV/0!		0.305364	0.283135	0.263923	0.247153	0.232386	0.219285	0	0	0	0
[S]2	2	0.37	0.33	0.31	0.29	0.28	0.27	0	0	0	0	0	0	0	0	0	0						0.362627	0.336493	0.313872	0.294101	0.276673	0.261196	#DIV/0!	#DIV/0!	#DIV/0!	#DIV/0!	#DIV/0!	#DIV/0!	#DIV/0!	#DIV/0!	#DIV/0!	#DIV/0!		0.362627	0.336493	0.313872	0.294101	0.276673	0.261196	0	0	0	0
[S]3	3	0.45	0.41	0.38	0.36	0.34	0.33	0	0	0	0	0	0	0	0	0	0						0.446324	0.414631	0.387141	0.363069	0.341815	0.322912	#DIV/0!	#DIV/0!	#DIV/0!	#DIV/0!	#DIV/0!	#DIV/0!	#DIV/0!	#DIV/0!	#DIV/0!	#DIV/0!		0.446324	0.414631	0.387141	0.363069	0.341815	0.322912	0	0	0	0
[S]4	4	0.51	0.47	0.43	0.41	0.39	0.37	0	0	0	0	0	0	0	0	0	0						0.504551	0.469097	0.438298	0.411294	0.387424	0.366173	#DIV/0!	#DIV/0!	#DIV/0!	#DIV/0!	#DIV/0!	#DIV/0!	#DIV/0!	#DIV/0!	#DIV/0!	#DIV/0!		0.504551	0.469097	0.438298	0.411294	0.387424	0.366173	0	0	0	0
[S]5	0	0	0	0	0	0	0	0	0	0	0	0	0	0	0	0	0						#DIV/0!	#DIV/0!	#DIV/0!	#DIV/0!	#DIV/0!	#DIV/0!	#DIV/0!	#DIV/0!	#DIV/0!	#DIV/0!	#DIV/0!	#DIV/0!	#DIV/0!	#DIV/0!	#DIV/0!	#DIV/0!		0	0	0	0	0	0	0	0	0	0
[S]6	0	0	0	0	0	0	0	0	0	0	0	0	0	0	0	0	0			Sum R2	0.000549142		#DIV/0!	#DIV/0!	#DIV/0!	#DIV/0!	#DIV/0!	#DIV/0!	#DIV/0!	#DIV/0!	#DIV/0!	#DIV/0!	#DIV/0!	#DIV/0!	#DIV/0!	#DIV/0!	#DIV/0!	#DIV/0!		0	0	0	0	0	0	0	0	0	0
[S]7	0	0	0	0	0	0	0	0	0	0	0	0	0	0	0	0	0			Sum residuals %	0.303275		#DIV/0!	#DIV/0!	#DIV/0!	#DIV/0!	#DIV/0!	#DIV/0!	#DIV/0!	#DIV/0!	#DIV/0!	#DIV/0!	#DIV/0!	#DIV/0!	#DIV/0!	#DIV/0!	#DIV/0!	#DIV/0!		0	0	0	0	0	0	0	0	0	0
[S]8	0	0	0	0	0	0	0	0	0	0	0	0	0	0	0	0	0						#DIV/0!	#DIV/0!	#DIV/0!	#DIV/0!	#DIV/0!	#DIV/0!	#DIV/0!	#DIV/0!	#DIV/0!	#DIV/0!	#DIV/0!	#DIV/0!	#DIV/0!	#DIV/0!	#DIV/0!	#DIV/0!		0	0	0	0	0	0	0	0	0	0
[S]9	0	0	0	0	0	0	0	0	0	0	0	0	0	0	0	0	0						#DIV/0!	#DIV/0!	#DIV/0!	#DIV/0!	#DIV/0!	#DIV/0!	#DIV/0!	#DIV/0!	#DIV/0!	#DIV/0!	#DIV/0!	#DIV/0!	#DIV/0!	#DIV/0!	#DIV/0!	#DIV/0!		0	0	0	0	0	0	0	0	0	0
[S]10	0	0	0	0	0	0	0	0	0	0	0	0	0	0	0	0	0						#DIV/0!	#DIV/0!	#DIV/0!	#DIV/0!	#DIV/0!	#DIV/0!	#DIV/0!	#DIV/0!	#DIV/0!	#DIV/0!	#DIV/0!	#DIV/0!	#DIV/0!	#DIV/0!	#DIV/0!	#DIV/0!		0	0	0	0	0	0	0	0	0	0
[S]11	0	0	0	0	0	0	0	0	0	0	0	0	0	0	0	0	0						#DIV/0!	#DIV/0!	#DIV/0!	#DIV/0!	#DIV/0!	#DIV/0!	#DIV/0!	#DIV/0!	#DIV/0!	#DIV/0!	#DIV/0!	#DIV/0!	#DIV/0!	#DIV/0!	#DIV/0!	#DIV/0!		0	0	0	0	0	0	0	0	0	0
[S]12	0	0	0	0	0	0	0	0	0	0	0	0	0	0	0	0	0						#DIV/0!	#DIV/0!	#DIV/0!	#DIV/0!	#DIV/0!	#DIV/0!	#DIV/0!	#DIV/0!	#DIV/0!	#DIV/0!	#DIV/0!	#DIV/0!	#DIV/0!	#DIV/0!	#DIV/0!	#DIV/0!		0	0	0	0	0	0	0	0	0	0
[S]13	0	0	0	0	0	0	0	0	0	0	0	0	0	0	0	0	0						#DIV/0!	#DIV/0!	#DIV/0!	#DIV/0!	#DIV/0!	#DIV/0!	#DIV/0!	#DIV/0!	#DIV/0!	#DIV/0!	#DIV/0!	#DIV/0!	#DIV/0!	#DIV/0!	#DIV/0!	#DIV/0!		0	0	0	0	0	0	0	0	0	0
[S]14	0	0	0	0	0	0	0	0	0	0	0	0	0	0	0	0	0						#DIV/0!	#DIV/0!	#DIV/0!	#DIV/0!	#DIV/0!	#DIV/0!	#DIV/0!	#DIV/0!	#DIV/0!	#DIV/0!	#DIV/0!	#DIV/0!	#DIV/0!	#DIV/0!	#DIV/0!	#DIV/0!		0	0	0	0	0	0	0	0	0	0
[S]15	0	0	0	0	0	0	0	0	0	0	0	0	0	0	0	0	0						#DIV/0!	#DIV/0!	#DIV/0!	#DIV/0!	#DIV/0!	#DIV/0!	#DIV/0!	#DIV/0!	#DIV/0!	#DIV/0!	#DIV/0!	#DIV/0!	#DIV/0!	#DIV/0!	#DIV/0!	#DIV/0!		0	0	0	0	0	0	0	0	0	0
	1	1	1	1	1	1	1	#DIV/0!	#DIV/0!	#DIV/0!	#DIV/0!	#DIV/0!	#DIV/0!	#DIV/0!	#DIV/0!	#DIV/0!	#DIV/0!																					1.5	1.5	0.305364	0.283135	0.263923	0.247153	0.232386	0.219285	#N/A	#N/A	#N/A	#N/A
	1	1	1	1	1	1	1	#DIV/0!	#DIV/0!	#DIV/0!	#DIV/0!	#DIV/0!	#DIV/0!	#DIV/0!	#DIV/0!	#DIV/0!	#DIV/0!					0.31	0.31	0.305364		-0.00463584	-0.00463584	4										2	2	0.362627	0.336493	0.313872	0.294101	0.276673	0.261196	#N/A	#N/A	#N/A	#N/A
	1	1	1	1	1	1	1	#DIV/0!	#DIV/0!	#DIV/0!	#DIV/0!	#DIV/0!	#DIV/0!	#DIV/0!	#DIV/0!	#DIV/0!	#DIV/0!					0.37	0.37	0.362627		-0.00737252	-0.00737252	4										3	3	0.446324	0.414631	0.387141	0.363069	0.341815	0.322912	#N/A	#N/A	#N/A	#N/A
	1	1	1	1	1	1	1	#DIV/0!	#DIV/0!	#DIV/0!	#DIV/0!	#DIV/0!	#DIV/0!	#DIV/0!	#DIV/0!	#DIV/0!	#DIV/0!					0.45	0.45	0.446324		-0.0036757	-0.0036757	4										4	4	0.504551	0.469097	0.438298	0.411294	0.387424	0.366173	#N/A	#N/A	#N/A	#N/A
	#DIV/0!	#DIV/0!	#DIV/0!	#DIV/0!	#DIV/0!	#DIV/0!	#DIV/0!	#DIV/0!	#DIV/0!	#DIV/0!	#DIV/0!	#DIV/0!	#DIV/0!	#DIV/0!	#DIV/0!	#DIV/0!	#DIV/0!					0.51	0.51	0.504551		-0.00544883	-0.00544883	4										#DIV/0!	#N/A	#N/A	#N/A	#N/A	#N/A	#N/A	#N/A	#N/A	#N/A	#N/A	#N/A
	#DIV/0!	#DIV/0!	#DIV/0!	#DIV/0!	#DIV/0!	#DIV/0!	#DIV/0!	#DIV/0!	#DIV/0!	#DIV/0!	#DIV/0!	#DIV/0!	#DIV/0!	#DIV/0!	#DIV/0!	#DIV/0!	#DIV/0!					#DIV/0!	#N/A	#N/A		#DIV/0!		4										#DIV/0!	#N/A	#N/A	#N/A	#N/A	#N/A	#N/A	#N/A	#N/A	#N/A	#N/A	#N/A
	#DIV/0!	#DIV/0!	#DIV/0!	#DIV/0!	#DIV/0!	#DIV/0!	#DIV/0!	#DIV/0!	#DIV/0!	#DIV/0!	#DIV/0!	#DIV/0!	#DIV/0!	#DIV/0!	#DIV/0!	#DIV/0!	#DIV/0!					#DIV/0!	#N/A	#N/A		#DIV/0!		4										#DIV/0!	#N/A	#N/A	#N/A	#N/A	#N/A	#N/A	#N/A	#N/A	#N/A	#N/A	#N/A
	#DIV/0!	#DIV/0!	#DIV/0!	#DIV/0!	#DIV/0!	#DIV/0!	#DIV/0!	#DIV/0!	#DIV/0!	#DIV/0!	#DIV/0!	#DIV/0!	#DIV/0!	#DIV/0!	#DIV/0!	#DIV/0!	#DIV/0!					#DIV/0!	#N/A	#N/A		#DIV/0!		4										#DIV/0!	#N/A	#N/A	#N/A	#N/A	#N/A	#N/A	#N/A	#N/A	#N/A	#N/A	#N/A
	#DIV/0!	#DIV/0!	#DIV/0!	#DIV/0!	#DIV/0!	#DIV/0!	#DIV/0!	#DIV/0!	#DIV/0!	#DIV/0!	#DIV/0!	#DIV/0!	#DIV/0!	#DIV/0!	#DIV/0!	#DIV/0!	#DIV/0!					#DIV/0!	#N/A	#N/A		#DIV/0!		4										#DIV/0!	#N/A	#N/A	#N/A	#N/A	#N/A	#N/A	#N/A	#N/A	#N/A	#N/A	#N/A
	#DIV/0!	#DIV/0!	#DIV/0!	#DIV/0!	#DIV/0!	#DIV/0!	#DIV/0!	#DIV/0!	#DIV/0!	#DIV/0!	#DIV/0!	#DIV/0!	#DIV/0!	#DIV/0!	#DIV/0!	#DIV/0!	#DIV/0!					#DIV/0!	#N/A	#N/A		#DIV/0!		4										#DIV/0!	#N/A	#N/A	#N/A	#N/A	#N/A	#N/A	#N/A	#N/A	#N/A	#N/A	#N/A
	#DIV/0!	#DIV/0!	#DIV/0!	#DIV/0!	#DIV/0!	#DIV/0!	#DIV/0!	#DIV/0!	#DIV/0!	#DIV/0!	#DIV/0!	#DIV/0!	#DIV/0!	#DIV/0!	#DIV/0!	#DIV/0!	#DIV/0!					#DIV/0!	#N/A	#N/A		#DIV/0!		4										#DIV/0!	#N/A	#N/A	#N/A	#N/A	#N/A	#N/A	#N/A	#N/A	#N/A	#N/A	#N/A
	#DIV/0!	#DIV/0!	#DIV/0!	#DIV/0!	#DIV/0!	#DIV/0!	#DIV/0!	#DIV/0!	#DIV/0!	#DIV/0!	#DIV/0!	#DIV/0!	#DIV/0!	#DIV/0!	#DIV/0!	#DIV/0!	#DIV/0!					#DIV/0!	#N/A	#N/A		#DIV/0!		4										#DIV/0!	#N/A	#N/A	#N/A	#N/A	#N/A	#N/A	#N/A	#N/A	#N/A	#N/A	#N/A
	#DIV/0!	#DIV/0!	#DIV/0!	#DIV/0!	#DIV/0!	#DIV/0!	#DIV/0!	#DIV/0!	#DIV/0!	#DIV/0!	#DIV/0!	#DIV/0!	#DIV/0!	#DIV/0!	#DIV/0!	#DIV/0!	#DIV/0!					#DIV/0!	#N/A	#N/A		#DIV/0!		4										#DIV/0!	#N/A	#N/A	#N/A	#N/A	#N/A	#N/A	#N/A	#N/A	#N/A	#N/A	#N/A
	#DIV/0!	#DIV/0!	#DIV/0!	#DIV/0!	#DIV/0!	#DIV/0!	#DIV/0!	#DIV/0!	#DIV/0!	#DIV/0!	#DIV/0!	#DIV/0!	#DIV/0!	#DIV/0!	#DIV/0!	#DIV/0!	#DIV/0!					#DIV/0!	#N/A	#N/A		#DIV/0!		4										#DIV/0!	#N/A	#N/A	#N/A	#N/A	#N/A	#N/A	#N/A	#N/A	#N/A	#N/A	#N/A
	#DIV/0!	#DIV/0!	#DIV/0!	#DIV/0!	#DIV/0!	#DIV/0!	#DIV/0!	#DIV/0!	#DIV/0!	#DIV/0!	#DIV/0!	#DIV/0!	#DIV/0!	#DIV/0!	#DIV/0!	#DIV/0!	#DIV/0!					#DIV/0!	#N/A	#N/A		#DIV/0!		4										#DIV/0!	#N/A	#N/A	#N/A	#N/A	#N/A	#N/A	#N/A	#N/A	#N/A	#N/A	#N/A
																						#DIV/0!	#N/A	#N/A		#DIV/0!		4
																						0.28	0.28	0.283135		0.00313539	0.00313539	4											0.666667	3.27478	3.53188	3.78898	4.04608	4.30318	4.56028	#N/A	#N/A	#N/A	#N/A
																						0.33	0.33	0.336493		0.00649294	0.00649294	4											0.5	2.75765	2.97183	3.18601	3.40019	3.61437	3.82855	#N/A	#N/A	#N/A	#N/A
																						0.41	0.41	0.414631		0.00463121	0.00463121	4											0.333333	2.24052	2.41178	2.58304	2.7543	2.92556	3.09682	#N/A	#N/A	#N/A	#N/A
																						0.47	0.47	0.469097		-0.000903469	-0.000903469	4											0.25	1.98196	2.13176	2.28156	2.43135	2.58115	2.73095	#N/A	#N/A	#N/A	#N/A
																						#DIV/0!	#N/A	#N/A		#DIV/0!		4											#N/A	#N/A	#N/A	#N/A	#N/A	#N/A	#N/A	#N/A	#N/A	#N/A	#N/A
																						#DIV/0!	#N/A	#N/A		#DIV/0!		4											#N/A	#N/A	#N/A	#N/A	#N/A	#N/A	#N/A	#N/A	#N/A	#N/A	#N/A
																						#DIV/0!	#N/A	#N/A		#DIV/0!		4											#N/A	#N/A	#N/A	#N/A	#N/A	#N/A	#N/A	#N/A	#N/A	#N/A	#N/A
																						#DIV/0!	#N/A	#N/A		#DIV/0!		4											#N/A	#N/A	#N/A	#N/A	#N/A	#N/A	#N/A	#N/A	#N/A	#N/A	#N/A
																						#DIV/0!	#N/A	#N/A		#DIV/0!		4											#N/A	#N/A	#N/A	#N/A	#N/A	#N/A	#N/A	#N/A	#N/A	#N/A	#N/A
																						#DIV/0!	#N/A	#N/A		#DIV/0!		4											#N/A	#N/A	#N/A	#N/A	#N/A	#N/A	#N/A	#N/A	#N/A	#N/A	#N/A
																						#DIV/0!	#N/A	#N/A		#DIV/0!		4											#N/A	#N/A	#N/A	#N/A	#N/A	#N/A	#N/A	#N/A	#N/A	#N/A	#N/A
																						#DIV/0!	#N/A	#N/A		#DIV/0!		4											#N/A	#N/A	#N/A	#N/A	#N/A	#N/A	#N/A	#N/A	#N/A	#N/A	#N/A
																						#DIV/0!	#N/A	#N/A		#DIV/0!		4											#N/A	#N/A	#N/A	#N/A	#N/A	#N/A	#N/A	#N/A	#N/A	#N/A	#N/A
																						#DIV/0!	#N/A	#N/A		#DIV/0!		4											#N/A	#N/A	#N/A	#N/A	#N/A	#N/A	#N/A	#N/A	#N/A	#N/A	#N/A
																						#DIV/0!	#N/A	#N/A		#DIV/0!		4											#N/A	#N/A	#N/A	#N/A	#N/A	#N/A	#N/A	#N/A	#N/A	#N/A	#N/A
																						0.26	0.26	0.263923		0.00392327	0.00392327	4
																						0.31	0.31	0.313872		0.0038722	0.0038722	4												0.31	0.28	0.26	0.25	0.23	0.22	#DIV/0!	#DIV/0!	#DIV/0!	#DIV/0!
																						0.38	0.38	0.387141		0.0071407	0.0071407	4												0.37	0.33	0.31	0.29	0.28	0.27	#DIV/0!	#DIV/0!	#DIV/0!	#DIV/0!
																						0.43	0.43	0.438298		0.00829751	0.00829751	4												0.45	0.41	0.38	0.36	0.34	0.33	#DIV/0!	#DIV/0!	#DIV/0!	#DIV/0!
																						#DIV/0!	#N/A	#N/A		#DIV/0!		4												0.51	0.47	0.43	0.41	0.39	0.37	#DIV/0!	#DIV/0!	#DIV/0!	#DIV/0!
																						#DIV/0!	#N/A	#N/A		#DIV/0!		4												#DIV/0!	#DIV/0!	#DIV/0!	#DIV/0!	#DIV/0!	#DIV/0!	#DIV/0!	#DIV/0!	#DIV/0!	#DIV/0!
																						#DIV/0!	#N/A	#N/A		#DIV/0!		4												#DIV/0!	#DIV/0!	#DIV/0!	#DIV/0!	#DIV/0!	#DIV/0!	#DIV/0!	#DIV/0!	#DIV/0!	#DIV/0!
																						#DIV/0!	#N/A	#N/A		#DIV/0!		4												#DIV/0!	#DIV/0!	#DIV/0!	#DIV/0!	#DIV/0!	#DIV/0!	#DIV/0!	#DIV/0!	#DIV/0!	#DIV/0!
																						#DIV/0!	#N/A	#N/A		#DIV/0!		4												#DIV/0!	#DIV/0!	#DIV/0!	#DIV/0!	#DIV/0!	#DIV/0!	#DIV/0!	#DIV/0!	#DIV/0!	#DIV/0!
																						#DIV/0!	#N/A	#N/A		#DIV/0!		4												#DIV/0!	#DIV/0!	#DIV/0!	#DIV/0!	#DIV/0!	#DIV/0!	#DIV/0!	#DIV/0!	#DIV/0!	#DIV/0!
																						#DIV/0!	#N/A	#N/A		#DIV/0!		4												#DIV/0!	#DIV/0!	#DIV/0!	#DIV/0!	#DIV/0!	#DIV/0!	#DIV/0!	#DIV/0!	#DIV/0!	#DIV/0!
																						#DIV/0!	#N/A	#N/A		#DIV/0!		4												#DIV/0!	#DIV/0!	#DIV/0!	#DIV/0!	#DIV/0!	#DIV/0!	#DIV/0!	#DIV/0!	#DIV/0!	#DIV/0!
																						#DIV/0!	#N/A	#N/A		#DIV/0!		4												#DIV/0!	#DIV/0!	#DIV/0!	#DIV/0!	#DIV/0!	#DIV/0!	#DIV/0!	#DIV/0!	#DIV/0!	#DIV/0!
																						#DIV/0!	#N/A	#N/A		#DIV/0!		4												#DIV/0!	#DIV/0!	#DIV/0!	#DIV/0!	#DIV/0!	#DIV/0!	#DIV/0!	#DIV/0!	#DIV/0!	#DIV/0!
																						#DIV/0!	#N/A	#N/A		#DIV/0!		4												#DIV/0!	#DIV/0!	#DIV/0!	#DIV/0!	#DIV/0!	#DIV/0!	#DIV/0!	#DIV/0!	#DIV/0!	#DIV/0!
																						0.25	0.25	0.247153		-0.00284725	-0.00284725	4												#DIV/0!	#DIV/0!	#DIV/0!	#DIV/0!	#DIV/0!	#DIV/0!	#DIV/0!	#DIV/0!	#DIV/0!	#DIV/0!
																						0.29	0.29	0.294101		0.00410124	0.00410124	4
																						0.36	0.36	0.363069		0.00306883	0.00306883	4												1/s	0	5	10	15	20	25	0	0	0
																						0.41	0.41	0.411294		0.00129361	0.00129361	4											1	0.666667	3.27478	3.53188	3.78898	4.04608	4.30318	4.56028	#N/A	#N/A	#N/A
																						#DIV/0!	#N/A	#N/A		#DIV/0!		4											2	0.5	2.75765	2.97183	3.18601	3.40019	3.61437	3.82855	#N/A	#N/A	#N/A
																						#DIV/0!	#N/A	#N/A		#DIV/0!		4											3	0.333333	2.24052	2.41178	2.58304	2.7543	2.92556	3.09682	#N/A	#N/A	#N/A
																						#DIV/0!	#N/A	#N/A		#DIV/0!		4											4	0.25	1.98196	2.13176	2.28156	2.43135	2.58115	2.73095	#N/A	#N/A	#N/A
																						#DIV/0!	#N/A	#N/A		#DIV/0!		4											5	#N/A	#N/A	#N/A	#N/A	#N/A	#N/A	#N/A	#N/A	#N/A	#N/A
																						#DIV/0!	#N/A	#N/A		#DIV/0!		4											6	#N/A	#N/A	#N/A	#N/A	#N/A	#N/A	#N/A	#N/A	#N/A	#N/A
																						#DIV/0!	#N/A	#N/A		#DIV/0!		4											7	#N/A	#N/A	#N/A	#N/A	#N/A	#N/A	#N/A	#N/A	#N/A	#N/A
																						#DIV/0!	#N/A	#N/A		#DIV/0!		4											8	#N/A	#N/A	#N/A	#N/A	#N/A	#N/A	#N/A	#N/A	#N/A	#N/A
																						#DIV/0!	#N/A	#N/A		#DIV/0!		4											9	#N/A	#N/A	#N/A	#N/A	#N/A	#N/A	#N/A	#N/A	#N/A	#N/A
																						#DIV/0!	#N/A	#N/A		#DIV/0!		4											10	#N/A	#N/A	#N/A	#N/A	#N/A	#N/A	#N/A	#N/A	#N/A	#N/A
																						#DIV/0!	#N/A	#N/A		#DIV/0!		4											11	#N/A	#N/A	#N/A	#N/A	#N/A	#N/A	#N/A	#N/A	#N/A	#N/A
																						#DIV/0!	#N/A	#N/A		#DIV/0!		4											12	#N/A	#N/A	#N/A	#N/A	#N/A	#N/A	#N/A	#N/A	#N/A	#N/A
																						0.23	0.23	0.232386		0.0023862	0.0023862	4											13	#N/A	#N/A	#N/A	#N/A	#N/A	#N/A	#N/A	#N/A	#N/A	#N/A
																						0.28	0.28	0.276673		-0.00332656	-0.00332656	4											14	#N/A	#N/A	#N/A	#N/A	#N/A	#N/A	#N/A	#N/A	#N/A	#N/A
																						0.34	0.34	0.341815		0.00181524	0.00181524	4											15	#N/A	#N/A	#N/A	#N/A	#N/A	#N/A	#N/A	#N/A	#N/A	#N/A
																						0.39	0.39	0.387424		-0.00257594	-0.00257594	4
																						#DIV/0!	#N/A	#N/A		#DIV/0!		4
																						#DIV/0!	#N/A	#N/A		#DIV/0!		4
																						#DIV/0!	#N/A	#N/A		#DIV/0!		4
																						#DIV/0!	#N/A	#N/A		#DIV/0!		4
																						#DIV/0!	#N/A	#N/A		#DIV/0!		4
																						#DIV/0!	#N/A	#N/A		#DIV/0!		4
																						#DIV/0!	#N/A	#N/A		#DIV/0!		4
																						#DIV/0!	#N/A	#N/A		#DIV/0!		4
																						#DIV/0!	#N/A	#N/A		#DIV/0!		4
																						#DIV/0!	#N/A	#N/A		#DIV/0!		4
																						#DIV/0!	#N/A	#N/A		#DIV/0!		4
																						0.22	0.22	0.219285		-0.000715327	-0.000715327	4
																						0.27	0.27	0.261196		-0.00880443	-0.00880443	4
																						0.33	0.33	0.322912		-0.00708764	-0.00708764	4
																						0.37	0.37	0.366173		-0.0038269	-0.0038269	4
																						#DIV/0!	#N/A	#N/A		#DIV/0!		4
																						#DIV/0!	#N/A	#N/A		#DIV/0!		4
																						#DIV/0!	#N/A	#N/A		#DIV/0!		4
																						#DIV/0!	#N/A	#N/A		#DIV/0!		4
																						#DIV/0!	#N/A	#N/A		#DIV/0!		4
																						#DIV/0!	#N/A	#N/A		#DIV/0!		4
																						#DIV/0!	#N/A	#N/A		#DIV/0!		4
																						#DIV/0!	#N/A	#N/A		#DIV/0!		4
																						#DIV/0!	#N/A	#N/A		#DIV/0!		4
																						#DIV/0!	#N/A	#N/A		#DIV/0!		4
																						#DIV/0!	#N/A	#N/A		#DIV/0!		4
																						#DIV/0!	#N/A	#N/A		#DIV/0!		4
																						#DIV/0!	#N/A	#N/A		#DIV/0!		4
																						#DIV/0!	#N/A	#N/A		#DIV/0!		4
																						#DIV/0!	#N/A	#N/A		#DIV/0!		4
																						#DIV/0!	#N/A	#N/A		#DIV/0!		4
																						#DIV/0!	#N/A	#N/A		#DIV/0!		4
																						#DIV/0!	#N/A	#N/A		#DIV/0!		4
																						#DIV/0!	#N/A	#N/A		#DIV/0!		4
																						#DIV/0!	#N/A	#N/A		#DIV/0!		4
																						#DIV/0!	#N/A	#N/A		#DIV/0!		4
																						#DIV/0!	#N/A	#N/A		#DIV/0!		4
																						#DIV/0!	#N/A	#N/A		#DIV/0!		4
																						#DIV/0!	#N/A	#N/A		#DIV/0!		4
																						#DIV/0!	#N/A	#N/A		#DIV/0!		4
																						#DIV/0!	#N/A	#N/A		#DIV/0!		4
																						#DIV/0!	#N/A	#N/A		#DIV/0!		4
																						#DIV/0!	#N/A	#N/A		#DIV/0!		4
																						#DIV/0!	#N/A	#N/A		#DIV/0!		4
																						#DIV/0!	#N/A	#N/A		#DIV/0!		4
																						#DIV/0!	#N/A	#N/A		#DIV/0!		4
																						#DIV/0!	#N/A	#N/A		#DIV/0!		4
																						#DIV/0!	#N/A	#N/A		#DIV/0!		4
																						#DIV/0!	#N/A	#N/A		#DIV/0!		4
																						#DIV/0!	#N/A	#N/A		#DIV/0!		4
																						#DIV/0!	#N/A	#N/A		#DIV/0!		4
																						#DIV/0!	#N/A	#N/A		#DIV/0!		4
																						#DIV/0!	#N/A	#N/A		#DIV/0!		4
																						#DIV/0!	#N/A	#N/A		#DIV/0!		4
																						#DIV/0!	#N/A	#N/A		#DIV/0!		4
																						#DIV/0!	#N/A	#N/A		#DIV/0!		4
																						#DIV/0!	#N/A	#N/A		#DIV/0!		4
																						#DIV/0!	#N/A	#N/A		#DIV/0!		4
																						#DIV/0!	#N/A	#N/A		#DIV/0!		4
																						#DIV/0!	#N/A	#N/A		#DIV/0!		4
																						#DIV/0!	#N/A	#N/A		#DIV/0!		4
																						#DIV/0!	#N/A	#N/A		#DIV/0!		4
																						#DIV/0!	#N/A	#N/A		#DIV/0!		4
																						#DIV/0!	#N/A	#N/A		#DIV/0!		4
																						#DIV/0!	#N/A	#N/A		#DIV/0!		4
																						#DIV/0!	#N/A	#N/A		#DIV/0!		4
																						#DIV/0!	#N/A	#N/A		#DIV/0!		4
																						#DIV/0!	#N/A	#N/A		#DIV/0!		4
																						#DIV/0!	#N/A	#N/A		#DIV/0!		4
																						#DIV/0!	#N/A	#N/A		#DIV/0!		4
																						#DIV/0!	#N/A	#N/A		#DIV/0!		4
																						#DIV/0!	#N/A	#N/A		#DIV/0!		4
																						#DIV/0!	#N/A	#N/A		#DIV/0!		4
																						#DIV/0!	#N/A	#N/A		#DIV/0!		4
																						#DIV/0!	#N/A	#N/A		#DIV/0!		4
																						#DIV/0!	#N/A	#N/A		#DIV/0!		4
																						#DIV/0!	#N/A	#N/A		#DIV/0!		4
																						#DIV/0!	#N/A	#N/A		#DIV/0!		4
																						#DIV/0!	#N/A	#N/A		#DIV/0!		4
																						#DIV/0!	#N/A	#N/A		#DIV/0!		4
																						#DIV/0!	#N/A	#N/A		#DIV/0!		4
																						#DIV/0!	#N/A	#N/A		#DIV/0!		4
																						#DIV/0!	#N/A	#N/A		#DIV/0!		4
																						#DIV/0!	#N/A	#N/A		#DIV/0!		4
																						#DIV/0!	#N/A	#N/A		#DIV/0!		4
																						#DIV/0!	#N/A	#N/A		#DIV/0!		4
																						#DIV/0!	#N/A	#N/A		#DIV/0!		4
																						#DIV/0!	#N/A	#N/A		#DIV/0!		4
																						#DIV/0!	#N/A	#N/A		#DIV/0!		4
																						#DIV/0!	#N/A	#N/A		#DIV/0!		4
																						#DIV/0!	#N/A	#N/A		#DIV/0!		4
																						#DIV/0!	#N/A	#N/A		#DIV/0!		4
																						#DIV/0!	#N/A	#N/A		#DIV/0!		4
																						#DIV/0!	#N/A	#N/A		#DIV/0!		4
																						#DIV/0!	#N/A	#N/A		#DIV/0!		4
																						#DIV/0!	#N/A	#N/A		#DIV/0!		4
																						#DIV/0!	#N/A	#N/A		#DIV/0!		4
																						#DIV/0!	#N/A	#N/A		#DIV/0!		4
																						#DIV/0!	#N/A	#N/A		#DIV/0!		4
																						#DIV/0!	#N/A	#N/A		#DIV/0!		4
																						#DIV/0!	#N/A	#N/A		#DIV/0!		4
																						#DIV/0!	#N/A	#N/A		#DIV/0!		4
																						#DIV/0!	#N/A	#N/A		#DIV/0!		4
																						#DIV/0!	#N/A	#N/A		#DIV/0!		4
																						#DIV/0!	#N/A	#N/A		#DIV/0!		4
																						#DIV/0!	#N/A	#N/A		#DIV/0!		4
																						#DIV/0!	#N/A	#N/A		#DIV/0!		4
																						#DIV/0!	#N/A	#N/A		#DIV/0!		4
																						#DIV/0!	#N/A	#N/A		#DIV/0!		4
																						#DIV/0!	#N/A	#N/A		#DIV/0!		4
																						#DIV/0!	#N/A	#N/A		#DIV/0!		4
																						#DIV/0!	#N/A	#N/A		#DIV/0!		4
																						#DIV/0!	#N/A	#N/A		#DIV/0!		4
																						#DIV/0!	#N/A	#N/A		#DIV/0!		4
																						#DIV/0!	#N/A	#N/A		#DIV/0!		4
																						#DIV/0!	#N/A	#N/A		#DIV/0!		4
																						#DIV/0!	#N/A	#N/A		#DIV/0!		4
																						#DIV/0!	#N/A	#N/A		#DIV/0!		4
																						#DIV/0!	#N/A	#N/A		#DIV/0!		4
																						#DIV/0!	#N/A	#N/A		#DIV/0!		4
																						#DIV/0!	#N/A	#N/A		#DIV/0!		4
																						#DIV/0!	#N/A	#N/A		#DIV/0!		4
																						#DIV/0!	#N/A	#N/A		#DIV/0!		4
																						#DIV/0!	#N/A	#N/A		#DIV/0!		4
																						#DIV/0!	#N/A	#N/A		#DIV/0!		4
																						#DIV/0!	#N/A	#N/A		#DIV/0!		4
																						#DIV/0!	#N/A	#N/A		#DIV/0!		4
																						#DIV/0!	#N/A	#N/A		#DIV/0!		4
																						#DIV/0!	#N/A	#N/A		#DIV/0!		4
																						#DIV/0!	#N/A	#N/A		#DIV/0!		4
																						#DIV/0!	#N/A	#N/A		#DIV/0!		4
																						#DIV/0!	#N/A	#N/A		#DIV/0!		4
																						#DIV/0!	#N/A	#N/A		#DIV/0!		4
																						#DIV/0!	#N/A	#N/A		#DIV/0!		4
																						#DIV/0!	#N/A	#N/A		#DIV/0!		4
																						#DIV/0!	#N/A	#N/A		#DIV/0!		4
																						#DIV/0!	#N/A	#N/A		#DIV/0!		4
																						#DIV/0!	#N/A	#N/A		#DIV/0!		4
																						#DIV/0!	#N/A	#N/A		#DIV/0!		4
																						#DIV/0!	#N/A	#N/A		#DIV/0!		4
																						#DIV/0!	#N/A	#N/A		#DIV/0!		4
																						#DIV/0!	#N/A	#N/A		#DIV/0!		4
																						#DIV/0!	#N/A	#N/A		#DIV/0!		4
																						#DIV/0!	#N/A	#N/A		#DIV/0!		4
																						#DIV/0!	#N/A	#N/A		#DIV/0!		4
																						#DIV/0!	#N/A	#N/A		#DIV/0!		4
																						#DIV/0!	#N/A	#N/A		#DIV/0!		4
																						#DIV/0!	#N/A	#N/A		#DIV/0!		4
																						#DIV/0!	#N/A	#N/A		#DIV/0!		4
																						#DIV/0!	#N/A	#N/A		#DIV/0!		4
																						#DIV/0!	#N/A	#N/A		#DIV/0!		4
																						#DIV/0!	#N/A	#N/A		#DIV/0!		4
																						#DIV/0!	#N/A	#N/A		#DIV/0!		4
																						#DIV/0!	#N/A	#N/A		#DIV/0!		4
																						#DIV/0!	#N/A	#N/A		#DIV/0!		4
																						#DIV/0!	#N/A	#N/A		#DIV/0!		4
																						#DIV/0!	#N/A	#N/A		#DIV/0!		4
																						#DIV/0!	#N/A	#N/A		#DIV/0!		4
																						#DIV/0!	#N/A	#N/A		#DIV/0!		4
																						#DIV/0!	#N/A	#N/A		#DIV/0!		4
																						#DIV/0!	#N/A	#N/A		#DIV/0!		4
																						#DIV/0!	#N/A	#N/A		#DIV/0!		4
																						#DIV/0!	#N/A	#N/A		#DIV/0!		4
																						#DIV/0!	#N/A	#N/A		#DIV/0!		4
																						#DIV/0!	#N/A	#N/A		#DIV/0!		4
																						#DIV/0!	#N/A	#N/A		#DIV/0!		4
																						#DIV/0!	#N/A	#N/A		#DIV/0!		4
																						#DIV/0!	#N/A	#N/A		#DIV/0!		4
																						#DIV/0!	#N/A	#N/A		#DIV/0!		4
																						#DIV/0!	#N/A	#N/A		#DIV/0!		4
																						#DIV/0!	#N/A	#N/A		#DIV/0!		4
																						#DIV/0!	#N/A	#N/A		#DIV/0!		4
																						#DIV/0!	#N/A	#N/A		#DIV/0!		4
																						#DIV/0!	#N/A	#N/A		#DIV/0!		4
																						#DIV/0!	#N/A	#N/A		#DIV/0!		4
																						#DIV/0!	#N/A	#N/A		#DIV/0!		4
[truncated: 54 more columns]

## Sheet: Modifier equation
																							Calculated values
		No Inhibitor	[I]1	[I]2	[I]3	[I]4	[I]5	[I]6	[I]7	[I]8	[I]9	[I]10	[I]11	[I]12	[I]13	[I]14	[I]15					Ki	No Inhibitor	[I]1	[I]2	[I]3	[I]4	[I]5	[I]6	[I]7	[I]8	[I]9	[I]10	[I]11	[I]12	[I]13	[I]14	[I]15
		0	5	10	15	20	25	0	0	0	0	0	0	0	0	0	0	K1	2.56258	V1	0.837812	26.7459	0	5	10	15	20	25	0	0	0	0	0	0	0	0	0	0
[S]1	1.5	0.31	0.28	0.26	0.25	0.23	0.22	0	0	0	0	0	0	0	0	0	0	K2	2.8191	V2	0.393778		0.30934	0.280726	0.260251	0.244875	0.232904	0.223319	#DIV/0!	#DIV/0!	#DIV/0!	#DIV/0!	#DIV/0!	#DIV/0!	#DIV/0!	#DIV/0!	#DIV/0!	#DIV/0!		0.30934	0.280726	0.260251	0.244875	0.232904	0.223319	0	0	0	0
[S]2	2	0.37	0.33	0.31	0.29	0.28	0.27	0	0	0	0	0	0	0	0	0	0						0.367253	0.333643	0.309548	0.291428	0.277306	0.265991	#DIV/0!	#DIV/0!	#DIV/0!	#DIV/0!	#DIV/0!	#DIV/0!	#DIV/0!	#DIV/0!	#DIV/0!	#DIV/0!		0.367253	0.333643	0.309548	0.291428	0.277306	0.265991	0	0	0	0
[S]3	3	0.45	0.41	0.38	0.36	0.34	0.33	0	0	0	0	0	0	0	0	0	0						0.451847	0.411143	0.381884	0.359837	0.342628	0.328823	#DIV/0!	#DIV/0!	#DIV/0!	#DIV/0!	#DIV/0!	#DIV/0!	#DIV/0!	#DIV/0!	#DIV/0!	#DIV/0!		0.451847	0.411143	0.381884	0.359837	0.342628	0.328823	0	0	0	0
[S]4	4	0.51	0.47	0.43	0.41	0.39	0.37	0	0	0	0	0	0	0	0	0	0						0.51066	0.465169	0.432407	0.407686	0.38837	0.372861	#DIV/0!	#DIV/0!	#DIV/0!	#DIV/0!	#DIV/0!	#DIV/0!	#DIV/0!	#DIV/0!	#DIV/0!	#DIV/0!		0.51066	0.465169	0.432407	0.407686	0.38837	0.372861	0	0	0	0
[S]5	0	0	0	0	0	0	0	0	0	0	0	0	0	0	0	0	0						#DIV/0!	#DIV/0!	#DIV/0!	#DIV/0!	#DIV/0!	#DIV/0!	#DIV/0!	#DIV/0!	#DIV/0!	#DIV/0!	#DIV/0!	#DIV/0!	#DIV/0!	#DIV/0!	#DIV/0!	#DIV/0!		0	0	0	0	0	0	0	0	0	0
[S]6	0	0	0	0	0	0	0	0	0	0	0	0	0	0	0	0	0			Sum R2	0.000155472		#DIV/0!	#DIV/0!	#DIV/0!	#DIV/0!	#DIV/0!	#DIV/0!	#DIV/0!	#DIV/0!	#DIV/0!	#DIV/0!	#DIV/0!	#DIV/0!	#DIV/0!	#DIV/0!	#DIV/0!	#DIV/0!		0	0	0	0	0	0	0	0	0	0
[S]7	0	0	0	0	0	0	0	0	0	0	0	0	0	0	0	0	0			Sum residuals %	0.161781		#DIV/0!	#DIV/0!	#DIV/0!	#DIV/0!	#DIV/0!	#DIV/0!	#DIV/0!	#DIV/0!	#DIV/0!	#DIV/0!	#DIV/0!	#DIV/0!	#DIV/0!	#DIV/0!	#DIV/0!	#DIV/0!		0	0	0	0	0	0	0	0	0	0
[S]8	0	0	0	0	0	0	0	0	0	0	0	0	0	0	0	0	0						#DIV/0!	#DIV/0!	#DIV/0!	#DIV/0!	#DIV/0!	#DIV/0!	#DIV/0!	#DIV/0!	#DIV/0!	#DIV/0!	#DIV/0!	#DIV/0!	#DIV/0!	#DIV/0!	#DIV/0!	#DIV/0!		0	0	0	0	0	0	0	0	0	0
[S]9	0	0	0	0	0	0	0	0	0	0	0	0	0	0	0	0	0						#DIV/0!	#DIV/0!	#DIV/0!	#DIV/0!	#DIV/0!	#DIV/0!	#DIV/0!	#DIV/0!	#DIV/0!	#DIV/0!	#DIV/0!	#DIV/0!	#DIV/0!	#DIV/0!	#DIV/0!	#DIV/0!		0	0	0	0	0	0	0	0	0	0
[S]10	0	0	0	0	0	0	0	0	0	0	0	0	0	0	0	0	0						#DIV/0!	#DIV/0!	#DIV/0!	#DIV/0!	#DIV/0!	#DIV/0!	#DIV/0!	#DIV/0!	#DIV/0!	#DIV/0!	#DIV/0!	#DIV/0!	#DIV/0!	#DIV/0!	#DIV/0!	#DIV/0!		0	0	0	0	0	0	0	0	0	0
[S]11	0	0	0	0	0	0	0	0	0	0	0	0	0	0	0	0	0						#DIV/0!	#DIV/0!	#DIV/0!	#DIV/0!	#DIV/0!	#DIV/0!	#DIV/0!	#DIV/0!	#DIV/0!	#DIV/0!	#DIV/0!	#DIV/0!	#DIV/0!	#DIV/0!	#DIV/0!	#DIV/0!		0	0	0	0	0	0	0	0	0	0
[S]12	0	0	0	0	0	0	0	0	0	0	0	0	0	0	0	0	0						#DIV/0!	#DIV/0!	#DIV/0!	#DIV/0!	#DIV/0!	#DIV/0!	#DIV/0!	#DIV/0!	#DIV/0!	#DIV/0!	#DIV/0!	#DIV/0!	#DIV/0!	#DIV/0!	#DIV/0!	#DIV/0!		0	0	0	0	0	0	0	0	0	0
[S]13	0	0	0	0	0	0	0	0	0	0	0	0	0	0	0	0	0						#DIV/0!	#DIV/0!	#DIV/0!	#DIV/0!	#DIV/0!	#DIV/0!	#DIV/0!	#DIV/0!	#DIV/0!	#DIV/0!	#DIV/0!	#DIV/0!	#DIV/0!	#DIV/0!	#DIV/0!	#DIV/0!		0	0	0	0	0	0	0	0	0	0
[S]14	0	0	0	0	0	0	0	0	0	0	0	0	0	0	0	0	0						#DIV/0!	#DIV/0!	#DIV/0!	#DIV/0!	#DIV/0!	#DIV/0!	#DIV/0!	#DIV/0!	#DIV/0!	#DIV/0!	#DIV/0!	#DIV/0!	#DIV/0!	#DIV/0!	#DIV/0!	#DIV/0!		0	0	0	0	0	0	0	0	0	0
[S]15	0	0	0	0	0	0	0	0	0	0	0	0	0	0	0	0	0						#DIV/0!	#DIV/0!	#DIV/0!	#DIV/0!	#DIV/0!	#DIV/0!	#DIV/0!	#DIV/0!	#DIV/0!	#DIV/0!	#DIV/0!	#DIV/0!	#DIV/0!	#DIV/0!	#DIV/0!	#DIV/0!		0	0	0	0	0	0	0	0	0	0
	1	1	1	1	1	1	1	#DIV/0!	#DIV/0!	#DIV/0!	#DIV/0!	#DIV/0!	#DIV/0!	#DIV/0!	#DIV/0!	#DIV/0!	#DIV/0!																					1.5	1.5	0.30934	0.280726	0.260251	0.244875	0.232904	0.223319	#N/A	#N/A	#N/A	#N/A
	1	1	1	1	1	1	1	#DIV/0!	#DIV/0!	#DIV/0!	#DIV/0!	#DIV/0!	#DIV/0!	#DIV/0!	#DIV/0!	#DIV/0!	#DIV/0!					0.31	0.31	0.30934		-0.000660417	-0.000660417	5										2	2	0.367253	0.333643	0.309548	0.291428	0.277306	0.265991	#N/A	#N/A	#N/A	#N/A
	1	1	1	1	1	1	1	#DIV/0!	#DIV/0!	#DIV/0!	#DIV/0!	#DIV/0!	#DIV/0!	#DIV/0!	#DIV/0!	#DIV/0!	#DIV/0!					0.37	0.37	0.367253		-0.00274669	-0.00274669	5										3	3	0.451847	0.411143	0.381884	0.359837	0.342628	0.328823	#N/A	#N/A	#N/A	#N/A
	1	1	1	1	1	1	1	#DIV/0!	#DIV/0!	#DIV/0!	#DIV/0!	#DIV/0!	#DIV/0!	#DIV/0!	#DIV/0!	#DIV/0!	#DIV/0!					0.45	0.45	0.451847		0.00184686	0.00184686	5										4	4	0.51066	0.465169	0.432407	0.407686	0.38837	0.372861	#N/A	#N/A	#N/A	#N/A
	#DIV/0!	#DIV/0!	#DIV/0!	#DIV/0!	#DIV/0!	#DIV/0!	#DIV/0!	#DIV/0!	#DIV/0!	#DIV/0!	#DIV/0!	#DIV/0!	#DIV/0!	#DIV/0!	#DIV/0!	#DIV/0!	#DIV/0!					0.51	0.51	0.51066		0.000659851	0.000659851	5										#DIV/0!	#N/A	#N/A	#N/A	#N/A	#N/A	#N/A	#N/A	#N/A	#N/A	#N/A	#N/A
	#DIV/0!	#DIV/0!	#DIV/0!	#DIV/0!	#DIV/0!	#DIV/0!	#DIV/0!	#DIV/0!	#DIV/0!	#DIV/0!	#DIV/0!	#DIV/0!	#DIV/0!	#DIV/0!	#DIV/0!	#DIV/0!	#DIV/0!					#DIV/0!	#N/A	#N/A		#DIV/0!		5										#DIV/0!	#N/A	#N/A	#N/A	#N/A	#N/A	#N/A	#N/A	#N/A	#N/A	#N/A	#N/A
	#DIV/0!	#DIV/0!	#DIV/0!	#DIV/0!	#DIV/0!	#DIV/0!	#DIV/0!	#DIV/0!	#DIV/0!	#DIV/0!	#DIV/0!	#DIV/0!	#DIV/0!	#DIV/0!	#DIV/0!	#DIV/0!	#DIV/0!					#DIV/0!	#N/A	#N/A		#DIV/0!		5										#DIV/0!	#N/A	#N/A	#N/A	#N/A	#N/A	#N/A	#N/A	#N/A	#N/A	#N/A	#N/A
	#DIV/0!	#DIV/0!	#DIV/0!	#DIV/0!	#DIV/0!	#DIV/0!	#DIV/0!	#DIV/0!	#DIV/0!	#DIV/0!	#DIV/0!	#DIV/0!	#DIV/0!	#DIV/0!	#DIV/0!	#DIV/0!	#DIV/0!					#DIV/0!	#N/A	#N/A		#DIV/0!		5										#DIV/0!	#N/A	#N/A	#N/A	#N/A	#N/A	#N/A	#N/A	#N/A	#N/A	#N/A	#N/A
	#DIV/0!	#DIV/0!	#DIV/0!	#DIV/0!	#DIV/0!	#DIV/0!	#DIV/0!	#DIV/0!	#DIV/0!	#DIV/0!	#DIV/0!	#DIV/0!	#DIV/0!	#DIV/0!	#DIV/0!	#DIV/0!	#DIV/0!					#DIV/0!	#N/A	#N/A		#DIV/0!		5										#DIV/0!	#N/A	#N/A	#N/A	#N/A	#N/A	#N/A	#N/A	#N/A	#N/A	#N/A	#N/A
	#DIV/0!	#DIV/0!	#DIV/0!	#DIV/0!	#DIV/0!	#DIV/0!	#DIV/0!	#DIV/0!	#DIV/0!	#DIV/0!	#DIV/0!	#DIV/0!	#DIV/0!	#DIV/0!	#DIV/0!	#DIV/0!	#DIV/0!					#DIV/0!	#N/A	#N/A		#DIV/0!		5										#DIV/0!	#N/A	#N/A	#N/A	#N/A	#N/A	#N/A	#N/A	#N/A	#N/A	#N/A	#N/A
	#DIV/0!	#DIV/0!	#DIV/0!	#DIV/0!	#DIV/0!	#DIV/0!	#DIV/0!	#DIV/0!	#DIV/0!	#DIV/0!	#DIV/0!	#DIV/0!	#DIV/0!	#DIV/0!	#DIV/0!	#DIV/0!	#DIV/0!					#DIV/0!	#N/A	#N/A		#DIV/0!		5										#DIV/0!	#N/A	#N/A	#N/A	#N/A	#N/A	#N/A	#N/A	#N/A	#N/A	#N/A	#N/A
	#DIV/0!	#DIV/0!	#DIV/0!	#DIV/0!	#DIV/0!	#DIV/0!	#DIV/0!	#DIV/0!	#DIV/0!	#DIV/0!	#DIV/0!	#DIV/0!	#DIV/0!	#DIV/0!	#DIV/0!	#DIV/0!	#DIV/0!					#DIV/0!	#N/A	#N/A		#DIV/0!		5										#DIV/0!	#N/A	#N/A	#N/A	#N/A	#N/A	#N/A	#N/A	#N/A	#N/A	#N/A	#N/A
	#DIV/0!	#DIV/0!	#DIV/0!	#DIV/0!	#DIV/0!	#DIV/0!	#DIV/0!	#DIV/0!	#DIV/0!	#DIV/0!	#DIV/0!	#DIV/0!	#DIV/0!	#DIV/0!	#DIV/0!	#DIV/0!	#DIV/0!					#DIV/0!	#N/A	#N/A		#DIV/0!		5										#DIV/0!	#N/A	#N/A	#N/A	#N/A	#N/A	#N/A	#N/A	#N/A	#N/A	#N/A	#N/A
	#DIV/0!	#DIV/0!	#DIV/0!	#DIV/0!	#DIV/0!	#DIV/0!	#DIV/0!	#DIV/0!	#DIV/0!	#DIV/0!	#DIV/0!	#DIV/0!	#DIV/0!	#DIV/0!	#DIV/0!	#DIV/0!	#DIV/0!					#DIV/0!	#N/A	#N/A		#DIV/0!		5										#DIV/0!	#N/A	#N/A	#N/A	#N/A	#N/A	#N/A	#N/A	#N/A	#N/A	#N/A	#N/A
	#DIV/0!	#DIV/0!	#DIV/0!	#DIV/0!	#DIV/0!	#DIV/0!	#DIV/0!	#DIV/0!	#DIV/0!	#DIV/0!	#DIV/0!	#DIV/0!	#DIV/0!	#DIV/0!	#DIV/0!	#DIV/0!	#DIV/0!					#DIV/0!	#N/A	#N/A		#DIV/0!		5										#DIV/0!	#N/A	#N/A	#N/A	#N/A	#N/A	#N/A	#N/A	#N/A	#N/A	#N/A	#N/A
																						#DIV/0!	#N/A	#N/A		#DIV/0!		5
																						0.28	0.28	0.280726		0.000725927	0.000725927	5											0.666667	3.23269	3.56219	3.84244	4.08372	4.29362	4.4779	#N/A	#N/A	#N/A	#N/A
																						0.33	0.33	0.333643		0.00364271	0.00364271	5											0.5	2.72292	2.99722	3.23052	3.43138	3.60612	3.75952	#N/A	#N/A	#N/A	#N/A
																						0.41	0.41	0.411143		0.00114312	0.00114312	5											0.333333	2.21314	2.43224	2.6186	2.77904	2.91861	3.04115	#N/A	#N/A	#N/A	#N/A
																						0.47	0.47	0.465169		-0.00483083	-0.00483083	5											0.25	1.95825	2.14976	2.31264	2.45287	2.57486	2.68196	#N/A	#N/A	#N/A	#N/A
																						#DIV/0!	#N/A	#N/A		#DIV/0!		5											#N/A	#N/A	#N/A	#N/A	#N/A	#N/A	#N/A	#N/A	#N/A	#N/A	#N/A
																						#DIV/0!	#N/A	#N/A		#DIV/0!		5											#N/A	#N/A	#N/A	#N/A	#N/A	#N/A	#N/A	#N/A	#N/A	#N/A	#N/A
																						#DIV/0!	#N/A	#N/A		#DIV/0!		5											#N/A	#N/A	#N/A	#N/A	#N/A	#N/A	#N/A	#N/A	#N/A	#N/A	#N/A
																						#DIV/0!	#N/A	#N/A		#DIV/0!		5											#N/A	#N/A	#N/A	#N/A	#N/A	#N/A	#N/A	#N/A	#N/A	#N/A	#N/A
																						#DIV/0!	#N/A	#N/A		#DIV/0!		5											#N/A	#N/A	#N/A	#N/A	#N/A	#N/A	#N/A	#N/A	#N/A	#N/A	#N/A
																						#DIV/0!	#N/A	#N/A		#DIV/0!		5											#N/A	#N/A	#N/A	#N/A	#N/A	#N/A	#N/A	#N/A	#N/A	#N/A	#N/A
																						#DIV/0!	#N/A	#N/A		#DIV/0!		5											#N/A	#N/A	#N/A	#N/A	#N/A	#N/A	#N/A	#N/A	#N/A	#N/A	#N/A
																						#DIV/0!	#N/A	#N/A		#DIV/0!		5											#N/A	#N/A	#N/A	#N/A	#N/A	#N/A	#N/A	#N/A	#N/A	#N/A	#N/A
																						#DIV/0!	#N/A	#N/A		#DIV/0!		5											#N/A	#N/A	#N/A	#N/A	#N/A	#N/A	#N/A	#N/A	#N/A	#N/A	#N/A
																						#DIV/0!	#N/A	#N/A		#DIV/0!		5											#N/A	#N/A	#N/A	#N/A	#N/A	#N/A	#N/A	#N/A	#N/A	#N/A	#N/A
																						#DIV/0!	#N/A	#N/A		#DIV/0!		5											#N/A	#N/A	#N/A	#N/A	#N/A	#N/A	#N/A	#N/A	#N/A	#N/A	#N/A
																						0.26	0.26	0.260251		0.000251002	0.000251002	5
																						0.31	0.31	0.309548		-0.000452451	-0.000452451	5												0.31	0.28	0.26	0.25	0.23	0.22	#DIV/0!	#DIV/0!	#DIV/0!	#DIV/0!
																						0.38	0.38	0.381884		0.00188366	0.00188366	5												0.37	0.33	0.31	0.29	0.28	0.27	#DIV/0!	#DIV/0!	#DIV/0!	#DIV/0!
																						0.43	0.43	0.432407		0.0024068	0.0024068	5												0.45	0.41	0.38	0.36	0.34	0.33	#DIV/0!	#DIV/0!	#DIV/0!	#DIV/0!
																						#DIV/0!	#N/A	#N/A		#DIV/0!		5												0.51	0.47	0.43	0.41	0.39	0.37	#DIV/0!	#DIV/0!	#DIV/0!	#DIV/0!
																						#DIV/0!	#N/A	#N/A		#DIV/0!		5												#DIV/0!	#DIV/0!	#DIV/0!	#DIV/0!	#DIV/0!	#DIV/0!	#DIV/0!	#DIV/0!	#DIV/0!	#DIV/0!
																						#DIV/0!	#N/A	#N/A		#DIV/0!		5												#DIV/0!	#DIV/0!	#DIV/0!	#DIV/0!	#DIV/0!	#DIV/0!	#DIV/0!	#DIV/0!	#DIV/0!	#DIV/0!
																						#DIV/0!	#N/A	#N/A		#DIV/0!		5												#DIV/0!	#DIV/0!	#DIV/0!	#DIV/0!	#DIV/0!	#DIV/0!	#DIV/0!	#DIV/0!	#DIV/0!	#DIV/0!
																						#DIV/0!	#N/A	#N/A		#DIV/0!		5												#DIV/0!	#DIV/0!	#DIV/0!	#DIV/0!	#DIV/0!	#DIV/0!	#DIV/0!	#DIV/0!	#DIV/0!	#DIV/0!
																						#DIV/0!	#N/A	#N/A		#DIV/0!		5												#DIV/0!	#DIV/0!	#DIV/0!	#DIV/0!	#DIV/0!	#DIV/0!	#DIV/0!	#DIV/0!	#DIV/0!	#DIV/0!
																						#DIV/0!	#N/A	#N/A		#DIV/0!		5												#DIV/0!	#DIV/0!	#DIV/0!	#DIV/0!	#DIV/0!	#DIV/0!	#DIV/0!	#DIV/0!	#DIV/0!	#DIV/0!
																						#DIV/0!	#N/A	#N/A		#DIV/0!		5												#DIV/0!	#DIV/0!	#DIV/0!	#DIV/0!	#DIV/0!	#DIV/0!	#DIV/0!	#DIV/0!	#DIV/0!	#DIV/0!
																						#DIV/0!	#N/A	#N/A		#DIV/0!		5												#DIV/0!	#DIV/0!	#DIV/0!	#DIV/0!	#DIV/0!	#DIV/0!	#DIV/0!	#DIV/0!	#DIV/0!	#DIV/0!
																						#DIV/0!	#N/A	#N/A		#DIV/0!		5												#DIV/0!	#DIV/0!	#DIV/0!	#DIV/0!	#DIV/0!	#DIV/0!	#DIV/0!	#DIV/0!	#DIV/0!	#DIV/0!
																						#DIV/0!	#N/A	#N/A		#DIV/0!		5												#DIV/0!	#DIV/0!	#DIV/0!	#DIV/0!	#DIV/0!	#DIV/0!	#DIV/0!	#DIV/0!	#DIV/0!	#DIV/0!
																						0.25	0.25	0.244875		-0.00512526	-0.00512526	5												#DIV/0!	#DIV/0!	#DIV/0!	#DIV/0!	#DIV/0!	#DIV/0!	#DIV/0!	#DIV/0!	#DIV/0!	#DIV/0!
																						0.29	0.29	0.291428		0.00142804	0.00142804	5
																						0.36	0.36	0.359837		-0.00016314	-0.00016314	5												1/s	0	5	10	15	20	25	0	0	0
																						0.41	0.41	0.407686		-0.0023137	-0.0023137	5											1	0.666667	3.23269	3.56219	3.84244	4.08372	4.29362	4.4779	#N/A	#N/A	#N/A
																						#DIV/0!	#N/A	#N/A		#DIV/0!		5											2	0.5	2.72292	2.99722	3.23052	3.43138	3.60612	3.75952	#N/A	#N/A	#N/A
																						#DIV/0!	#N/A	#N/A		#DIV/0!		5											3	0.333333	2.21314	2.43224	2.6186	2.77904	2.91861	3.04115	#N/A	#N/A	#N/A
																						#DIV/0!	#N/A	#N/A		#DIV/0!		5											4	0.25	1.95825	2.14976	2.31264	2.45287	2.57486	2.68196	#N/A	#N/A	#N/A
																						#DIV/0!	#N/A	#N/A		#DIV/0!		5											5	#N/A	#N/A	#N/A	#N/A	#N/A	#N/A	#N/A	#N/A	#N/A	#N/A
																						#DIV/0!	#N/A	#N/A		#DIV/0!		5											6	#N/A	#N/A	#N/A	#N/A	#N/A	#N/A	#N/A	#N/A	#N/A	#N/A
																						#DIV/0!	#N/A	#N/A		#DIV/0!		5											7	#N/A	#N/A	#N/A	#N/A	#N/A	#N/A	#N/A	#N/A	#N/A	#N/A
																						#DIV/0!	#N/A	#N/A		#DIV/0!		5											8	#N/A	#N/A	#N/A	#N/A	#N/A	#N/A	#N/A	#N/A	#N/A	#N/A
																						#DIV/0!	#N/A	#N/A		#DIV/0!		5											9	#N/A	#N/A	#N/A	#N/A	#N/A	#N/A	#N/A	#N/A	#N/A	#N/A
																						#DIV/0!	#N/A	#N/A		#DIV/0!		5											10	#N/A	#N/A	#N/A	#N/A	#N/A	#N/A	#N/A	#N/A	#N/A	#N/A
																						#DIV/0!	#N/A	#N/A		#DIV/0!		5											11	#N/A	#N/A	#N/A	#N/A	#N/A	#N/A	#N/A	#N/A	#N/A	#N/A
																						#DIV/0!	#N/A	#N/A		#DIV/0!		5											12	#N/A	#N/A	#N/A	#N/A	#N/A	#N/A	#N/A	#N/A	#N/A	#N/A
																						0.23	0.23	0.232904		0.00290352	0.00290352	5											13	#N/A	#N/A	#N/A	#N/A	#N/A	#N/A	#N/A	#N/A	#N/A	#N/A
																						0.28	0.28	0.277306		-0.00269354	-0.00269354	5											14	#N/A	#N/A	#N/A	#N/A	#N/A	#N/A	#N/A	#N/A	#N/A	#N/A
																						0.34	0.34	0.342628		0.0026284	0.0026284	5											15	#N/A	#N/A	#N/A	#N/A	#N/A	#N/A	#N/A	#N/A	#N/A	#N/A
																						0.39	0.39	0.38837		-0.0016296	-0.0016296	5
																						#DIV/0!	#N/A	#N/A		#DIV/0!		5
																						#DIV/0!	#N/A	#N/A		#DIV/0!		5
																						#DIV/0!	#N/A	#N/A		#DIV/0!		5
																						#DIV/0!	#N/A	#N/A		#DIV/0!		5
																						#DIV/0!	#N/A	#N/A		#DIV/0!		5
																						#DIV/0!	#N/A	#N/A		#DIV/0!		5
																						#DIV/0!	#N/A	#N/A		#DIV/0!		5
																						#DIV/0!	#N/A	#N/A		#DIV/0!		5
																						#DIV/0!	#N/A	#N/A		#DIV/0!		5
																						#DIV/0!	#N/A	#N/A		#DIV/0!		5
																						#DIV/0!	#N/A	#N/A		#DIV/0!		5
																						0.22	0.22	0.223319		0.00331903	0.00331903	5
																						0.27	0.27	0.265991		-0.00400888	-0.00400888	5
																						0.33	0.33	0.328823		-0.00117696	-0.00117696	5
																						0.37	0.37	0.372861		0.00286135	0.00286135	5
																						#DIV/0!	#N/A	#N/A		#DIV/0!		5
																						#DIV/0!	#N/A	#N/A		#DIV/0!		5
																						#DIV/0!	#N/A	#N/A		#DIV/0!		5
																						#DIV/0!	#N/A	#N/A		#DIV/0!		5
																						#DIV/0!	#N/A	#N/A		#DIV/0!		5
																						#DIV/0!	#N/A	#N/A		#DIV/0!		5
																						#DIV/0!	#N/A	#N/A		#DIV/0!		5
																						#DIV/0!	#N/A	#N/A		#DIV/0!		5
																						#DIV/0!	#N/A	#N/A		#DIV/0!		5
																						#DIV/0!	#N/A	#N/A		#DIV/0!		5
																						#DIV/0!	#N/A	#N/A		#DIV/0!		5
																						#DIV/0!	#N/A	#N/A		#DIV/0!		5
																						#DIV/0!	#N/A	#N/A		#DIV/0!		5
																						#DIV/0!	#N/A	#N/A		#DIV/0!		5
																						#DIV/0!	#N/A	#N/A		#DIV/0!		5
																						#DIV/0!	#N/A	#N/A		#DIV/0!		5
																						#DIV/0!	#N/A	#N/A		#DIV/0!		5
																						#DIV/0!	#N/A	#N/A		#DIV/0!		5
																						#DIV/0!	#N/A	#N/A		#DIV/0!		5
																						#DIV/0!	#N/A	#N/A		#DIV/0!		5
																						#DIV/0!	#N/A	#N/A		#DIV/0!		5
																						#DIV/0!	#N/A	#N/A		#DIV/0!		5
																						#DIV/0!	#N/A	#N/A		#DIV/0!		5
																						#DIV/0!	#N/A	#N/A		#DIV/0!		5
																						#DIV/0!	#N/A	#N/A		#DIV/0!		5
																						#DIV/0!	#N/A	#N/A		#DIV/0!		5
																						#DIV/0!	#N/A	#N/A		#DIV/0!		5
																						#DIV/0!	#N/A	#N/A		#DIV/0!		5
																						#DIV/0!	#N/A	#N/A		#DIV/0!		5
																						#DIV/0!	#N/A	#N/A		#DIV/0!		5
																						#DIV/0!	#N/A	#N/A		#DIV/0!		5
																						#DIV/0!	#N/A	#N/A		#DIV/0!		5
																						#DIV/0!	#N/A	#N/A		#DIV/0!		5
																						#DIV/0!	#N/A	#N/A		#DIV/0!		5
																						#DIV/0!	#N/A	#N/A		#DIV/0!		5
																						#DIV/0!	#N/A	#N/A		#DIV/0!		5
																						#DIV/0!	#N/A	#N/A		#DIV/0!		5
																						#DIV/0!	#N/A	#N/A		#DIV/0!		5
																						#DIV/0!	#N/A	#N/A		#DIV/0!		5
																						#DIV/0!	#N/A	#N/A		#DIV/0!		5
																						#DIV/0!	#N/A	#N/A		#DIV/0!		5
																						#DIV/0!	#N/A	#N/A		#DIV/0!		5
																						#DIV/0!	#N/A	#N/A		#DIV/0!		5
																						#DIV/0!	#N/A	#N/A		#DIV/0!		5
																						#DIV/0!	#N/A	#N/A		#DIV/0!		5
																						#DIV/0!	#N/A	#N/A		#DIV/0!		5
																						#DIV/0!	#N/A	#N/A		#DIV/0!		5
																						#DIV/0!	#N/A	#N/A		#DIV/0!		5
																						#DIV/0!	#N/A	#N/A		#DIV/0!		5
																						#DIV/0!	#N/A	#N/A		#DIV/0!		5
																						#DIV/0!	#N/A	#N/A		#DIV/0!		5
																						#DIV/0!	#N/A	#N/A		#DIV/0!		5
																						#DIV/0!	#N/A	#N/A		#DIV/0!		5
																						#DIV/0!	#N/A	#N/A		#DIV/0!		5
																						#DIV/0!	#N/A	#N/A		#DIV/0!		5
																						#DIV/0!	#N/A	#N/A		#DIV/0!		5
																						#DIV/0!	#N/A	#N/A		#DIV/0!		5
																						#DIV/0!	#N/A	#N/A		#DIV/0!		5
																						#DIV/0!	#N/A	#N/A		#DIV/0!		5
																						#DIV/0!	#N/A	#N/A		#DIV/0!		5
																						#DIV/0!	#N/A	#N/A		#DIV/0!		5
																						#DIV/0!	#N/A	#N/A		#DIV/0!		5
																						#DIV/0!	#N/A	#N/A		#DIV/0!		5
																						#DIV/0!	#N/A	#N/A		#DIV/0!		5
																						#DIV/0!	#N/A	#N/A		#DIV/0!		5
																						#DIV/0!	#N/A	#N/A		#DIV/0!		5
																						#DIV/0!	#N/A	#N/A		#DIV/0!		5
																						#DIV/0!	#N/A	#N/A		#DIV/0!		5
																						#DIV/0!	#N/A	#N/A		#DIV/0!		5
																						#DIV/0!	#N/A	#N/A		#DIV/0!		5
																						#DIV/0!	#N/A	#N/A		#DIV/0!		5
																						#DIV/0!	#N/A	#N/A		#DIV/0!		5
																						#DIV/0!	#N/A	#N/A		#DIV/0!		5
																						#DIV/0!	#N/A	#N/A		#DIV/0!		5
																						#DIV/0!	#N/A	#N/A		#DIV/0!		5
																						#DIV/0!	#N/A	#N/A		#DIV/0!		5
																						#DIV/0!	#N/A	#N/A		#DIV/0!		5
																						#DIV/0!	#N/A	#N/A		#DIV/0!		5
																						#DIV/0!	#N/A	#N/A		#DIV/0!		5
																						#DIV/0!	#N/A	#N/A		#DIV/0!		5
																						#DIV/0!	#N/A	#N/A		#DIV/0!		5
																						#DIV/0!	#N/A	#N/A		#DIV/0!		5
																						#DIV/0!	#N/A	#N/A		#DIV/0!		5
																						#DIV/0!	#N/A	#N/A		#DIV/0!		5
																						#DIV/0!	#N/A	#N/A		#DIV/0!		5
																						#DIV/0!	#N/A	#N/A		#DIV/0!		5
																						#DIV/0!	#N/A	#N/A		#DIV/0!		5
																						#DIV/0!	#N/A	#N/A		#DIV/0!		5
																						#DIV/0!	#N/A	#N/A		#DIV/0!		5
																						#DIV/0!	#N/A	#N/A		#DIV/0!		5
																						#DIV/0!	#N/A	#N/A		#DIV/0!		5
																						#DIV/0!	#N/A	#N/A		#DIV/0!		5
																						#DIV/0!	#N/A	#N/A		#DIV/0!		5
																						#DIV/0!	#N/A	#N/A		#DIV/0!		5
																						#DIV/0!	#N/A	#N/A		#DIV/0!		5
																						#DIV/0!	#N/A	#N/A		#DIV/0!		5
																						#DIV/0!	#N/A	#N/A		#DIV/0!		5
																						#DIV/0!	#N/A	#N/A		#DIV/0!		5
																						#DIV/0!	#N/A	#N/A		#DIV/0!		5
																						#DIV/0!	#N/A	#N/A		#DIV/0!		5
																						#DIV/0!	#N/A	#N/A		#DIV/0!		5
																						#DIV/0!	#N/A	#N/A		#DIV/0!		5
																						#DIV/0!	#N/A	#N/A		#DIV/0!		5
																						#DIV/0!	#N/A	#N/A		#DIV/0!		5
																						#DIV/0!	#N/A	#N/A		#DIV/0!		5
																						#DIV/0!	#N/A	#N/A		#DIV/0!		5
																						#DIV/0!	#N/A	#N/A		#DIV/0!		5
																						#DIV/0!	#N/A	#N/A		#DIV/0!		5
																						#DIV/0!	#N/A	#N/A		#DIV/0!		5
																						#DIV/0!	#N/A	#N/A		#DIV/0!		5
																						#DIV/0!	#N/A	#N/A		#DIV/0!		5
																						#DIV/0!	#N/A	#N/A		#DIV/0!		5
																						#DIV/0!	#N/A	#N/A		#DIV/0!		5
																						#DIV/0!	#N/A	#N/A		#DIV/0!		5
																						#DIV/0!	#N/A	#N/A		#DIV/0!		5
																						#DIV/0!	#N/A	#N/A		#DIV/0!		5
																						#DIV/0!	#N/A	#N/A		#DIV/0!		5
																						#DIV/0!	#N/A	#N/A		#DIV/0!		5
																						#DIV/0!	#N/A	#N/A		#DIV/0!		5
																						#DIV/0!	#N/A	#N/A		#DIV/0!		5
																						#DIV/0!	#N/A	#N/A		#DIV/0!		5
																						#DIV/0!	#N/A	#N/A		#DIV/0!		5
																						#DIV/0!	#N/A	#N/A		#DIV/0!		5
																						#DIV/0!	#N/A	#N/A		#DIV/0!		5
																						#DIV/0!	#N/A	#N/A		#DIV/0!		5
																						#DIV/0!	#N/A	#N/A		#DIV/0!		5
																						#DIV/0!	#N/A	#N/A		#DIV/0!		5
																						#DIV/0!	#N/A	#N/A		#DIV/0!		5
																						#DIV/0!	#N/A	#N/A		#DIV/0!		5
																						#DIV/0!	#N/A	#N/A		#DIV/0!		5
																						#DIV/0!	#N/A	#N/A		#DIV/0!		5
																						#DIV/0!	#N/A	#N/A		#DIV/0!		5
																						#DIV/0!	#N/A	#N/A		#DIV/0!		5
																						#DIV/0!	#N/A	#N/A		#DIV/0!		5
																						#DIV/0!	#N/A	#N/A		#DIV/0!		5
																						#DIV/0!	#N/A	#N/A		#DIV/0!		5
																						#DIV/0!	#N/A	#N/A		#DIV/0!		5
																						#DIV/0!	#N/A	#N/A		#DIV/0!		5
																						#DIV/0!	#N/A	#N/A		#DIV/0!		5
																						#DIV/0!	#N/A	#N/A		#DIV/0!		5
																						#DIV/0!	#N/A	#N/A		#DIV/0!		5
																						#DIV/0!	#N/A	#N/A		#DIV/0!		5
																						#DIV/0!	#N/A	#N/A		#DIV/0!		5
																						#DIV/0!	#N/A	#N/A		#DIV/0!		5
																						#DIV/0!	#N/A	#N/A		#DIV/0!		5
																						#DIV/0!	#N/A	#N/A		#DIV/0!		5
																						#DIV/0!	#N/A	#N/A		#DIV/0!		5
																						#DIV/0!	#N/A	#N/A		#DIV/0!		5
																						#DIV/0!	#N/A	#N/A		#DIV/0!		5
																						#DIV/0!	#N/A	#N/A		#DIV/0!		5
																						#DIV/0!	#N/A	#N/A		#DIV/0!		5
																						#DIV/0!	#N/A	#N/A		#DIV/0!		5
																						#DIV/0!	#N/A	#N/A		#DIV/0!		5
																						#DIV/0!	#N/A	#N/A		#DIV/0!		5
																						#DIV/0!	#N/A	#N/A		#DIV/0!		5
																						#DIV/0!	#N/A	#N/A		#DIV/0!		5
																						#DIV/0!	#N/A	#N/A		#DIV/0!		5
																						#DIV/0!	#N/A	#N/A		#DIV/0!		5
																						#DIV/0!	#N/A	#N/A		#DIV/0!		5
																						#DIV/0!	#N/A	#N/A		#DIV/0!		5
																						#DIV/0!	#N/A	#N/A		#DIV/0!		5
[truncated: 54 more columns]
