# Supplementary material for: Comparing enzyme activity modifier equations through the development of global data fitting templates in Excel
Source: PeerJ. 2018 Dec 14;6:e6082. doi: 10.7717/peerj.6082 (PMC6296338; doi:10.7717/peerj.6082)
Supplement: Supplemental Information 15 [file peerj-06-6082-s015.xlsx]

## Sheet: Raw data and fitting summary
		No Inhibitor	[I]1	[I]2	[I]3	[I]4	[I]5	[I]6	[I]7	[I]8	[I]9	[I]10	[I]11	[I]12	[I]13	[I]14	[I]15
		0	1	2	3	4	5
[S]1	2	0.51	0.505	0.502	0.499	0.496	0.493
[S]2	2.5	0.593	0.588	0.583	0.579	0.575	0.571
[S]3	3.33	0.71	0.702	0.695	0.689	0.683	0.679
[S]4	5	0.885	0.873	0.862	0.853	0.844	0.837
[S]5
[S]6
[S]7
[S]8
[S]9
[S]10
[S]11
[S]12
[S]13
[S]14
[S]15
		Direct linear plot Km, Vmax estimates
							77.6087	2	0.509717	1	1	2	0.509717	2	0.509717
		Km	4.82008				67.8268	2.5	0.593626	1	1	2.5	0.593626	2.5	0.593626
		Vmax	1.73816					3.33	0.710184	1	1	3.33	0.710184	3.33	0.710184
								5	0.885001	1	1	5	0.885001	5	0.885001
	Ki estimate based on linear decrease in activity							0	0	#DIV/0!	#DIV/0!	#DIV/0!	#DIV/0!	#N/A	#N/A
								0	0	#DIV/0!	#DIV/0!	#DIV/0!	#DIV/0!	#N/A	#N/A
		Ki	77.6087					0	0	#DIV/0!	#DIV/0!	#DIV/0!	#DIV/0!	#N/A	#N/A
								0	0	#DIV/0!	#DIV/0!	#DIV/0!	#DIV/0!	#N/A	#N/A
								0	0	#DIV/0!	#DIV/0!	#DIV/0!	#DIV/0!	#N/A	#N/A
								0	0	#DIV/0!	#DIV/0!	#DIV/0!	#DIV/0!	#N/A	#N/A
								0	0	#DIV/0!	#DIV/0!	#DIV/0!	#DIV/0!	#N/A	#N/A
								0	0	#DIV/0!	#DIV/0!	#DIV/0!	#DIV/0!	#N/A	#N/A
								0	0	#DIV/0!	#DIV/0!	#DIV/0!	#DIV/0!	#N/A	#N/A
								0	0	#DIV/0!	#DIV/0!	#DIV/0!	#DIV/0!	#N/A	#N/A
								0	0	#DIV/0!	#DIV/0!	#DIV/0!	#DIV/0!	#N/A	#N/A
			Km	Km2	Vmax	Vmax2	Ki	b	RSS	RSE	n	k	BIC
		Partial Non-competitive	4.56207		1.68392	1.38379	14.6316		0.000101253	0.00225004	24	4	-123.474
		Partial Competitive	4.79802	0.108072	1.6935		2023.12		1.72548e-05	0.000928839	24	4	-141.918
		Partial Uncompetitive	9.26985		2.36425	0.670651	1.64441		0.0197961	0.0314612	24	4	-68.4863
		Partial Mixed Non-competitive	4.82882	3.22216	1.7397		11.3831	0.667156	1.98394e-06	0.000323137	24	5	-163.083
		Modifier equation	4.8281	3.18478	1.73945	1.14695	11.7737		1.96754e-06	0.000321799	24	5	-163.17
													Residual distribution
													Partial Non-competitive	Partial Competitive	Partial Uncompetitive	Partial Mixed Non-competitive	Modifier equation
												Minimum value	-0.00448097	-0.0018276	-0.0590699	-0.00048196	-0.000501861
												First quartile	-0.00142665	-0.00053205	-0.0182626	-0.000254637	-0.000240482
												Median value	0.000257674	0.000205416	-0.00306035	1.47591e-05	-2.31721e-05
					Partial Non-competitive	Partial Competitive	Partial Uncompetitive	Partial Mixed Non-competitive	Modifier equation			Third quartile	0.000941488	0.000670375	0.0107532	0.0001781	0.000173964
				Q1	-0.00142665	-0.00053205	-0.0182626	-0.000254637	-0.000240482			Maximum value	0.00354885	0.00141658	0.0752595	0.000605399	0.000604462
				Min	-0.00448097	-0.0018276	-0.0590699	-0.00048196	-0.000501861
				Median	0.000257674	0.000205416	-0.00306035	1.47591e-05	-2.31721e-05
				Max	0.00354885	0.00141658	0.0752595	0.000605399	0.000604462
				Q3	0.000941488	0.000670375	0.0107532	0.0001781	0.000173964
	Partial Non-competitive
	Km	4.56207
	Vmax	1.68392
	bVmax	1.38379
	Ki	14.6316
	RSS	0.000101253
	Partial Competitive
	Km	4.79802
	Km2	0.108072
	Vmax	1.6935
	Ki	2023.12
	RSS	1.72548e-05
	Partial Uncompetitive
	Km	9.26985
	Vmax	2.36425
	Vmax2	0.670651
	Ki	1.64441
	RSS	0.0197961
	Partial Mixed Non-competitive
	Km	4.82882
	Km2	3.22216
	Vmax	1.7397
	Ki	11.3831
	b	0.667156
	RSS	1.98394e-06
	Modifier equation
	Km	4.8281
	Km2	3.18478
	Vmax	1.73945
	Vmax2	1.14695
	Kx	11.7737
	RSS	1.96754e-06

## Sheet: modified direct linear plot
Km/Vmax direct plot
									Intercept points x-axis																				Intercept points x-axis
										Line 1	Line 2	Line 3	Line 4	Line 5	Line 6	Line 7	Line 8	Line 9	Line 10	Line 11	Line 12	Line 13	Line 14	Line 15						Line 1	Line 2	Line 3	Line 4	Line 5	Line 6	Line 7	Line 8	Line 9	Line 10	Line 11	Line 12	Line 13	Line 14	Line 15
			x-intercept	y-interecept					Line 1																				Line 1
[Substrate]		v	[Substrate]/v	1/v					Line 2	2.74444																			Line 2	2.74444
2		0.51	3.92157	1.96078					Line 3	2.76582	2.78727																		Line 3	2.76582	2.78727
2.5		0.593	4.21585	1.68634					Line 4	2.76947	2.78199	2.77673																	Line 4	2.76947	2.78199	2.77673
3.33		0.71	4.69014	1.40845					Line 5	#DIV/0!	#DIV/0!	#DIV/0!	#DIV/0!																Line 5
5		0.885	5.64972	1.12994					Line 6	#DIV/0!	#DIV/0!	#DIV/0!	#DIV/0!	#DIV/0!															Line 6
0		0	#DIV/0!	#DIV/0!					Line 7	#DIV/0!	#DIV/0!	#DIV/0!	#DIV/0!	#DIV/0!	#DIV/0!														Line 7
0		0	#DIV/0!	#DIV/0!					Line 8	#DIV/0!	#DIV/0!	#DIV/0!	#DIV/0!	#DIV/0!	#DIV/0!	#DIV/0!													Line 8
0		0	#DIV/0!	#DIV/0!					Line 9	#DIV/0!	#DIV/0!	#DIV/0!	#DIV/0!	#DIV/0!	#DIV/0!	#DIV/0!	#DIV/0!												Line 9
0		0	#DIV/0!	#DIV/0!					Line 10	#DIV/0!	#DIV/0!	#DIV/0!	#DIV/0!	#DIV/0!	#DIV/0!	#DIV/0!	#DIV/0!	#DIV/0!											Line 10
0		0	#DIV/0!	#DIV/0!					Line 11	#DIV/0!	#DIV/0!	#DIV/0!	#DIV/0!	#DIV/0!	#DIV/0!	#DIV/0!	#DIV/0!	#DIV/0!	#DIV/0!										Line 11
0		0	#DIV/0!	#DIV/0!					Line 12	#DIV/0!	#DIV/0!	#DIV/0!	#DIV/0!	#DIV/0!	#DIV/0!	#DIV/0!	#DIV/0!	#DIV/0!	#DIV/0!	#DIV/0!									Line 12
0		0	#DIV/0!	#DIV/0!					Line 13	#DIV/0!	#DIV/0!	#DIV/0!	#DIV/0!	#DIV/0!	#DIV/0!	#DIV/0!	#DIV/0!	#DIV/0!	#DIV/0!	#DIV/0!	#DIV/0!								Line 13
0		0	#DIV/0!	#DIV/0!					Line 14	#DIV/0!	#DIV/0!	#DIV/0!	#DIV/0!	#DIV/0!	#DIV/0!	#DIV/0!	#DIV/0!	#DIV/0!	#DIV/0!	#DIV/0!	#DIV/0!	#DIV/0!							Line 14
0		0	#DIV/0!	#DIV/0!					Line 15	#DIV/0!	#DIV/0!	#DIV/0!	#DIV/0!	#DIV/0!	#DIV/0!	#DIV/0!	#DIV/0!	#DIV/0!	#DIV/0!	#DIV/0!	#DIV/0!	#DIV/0!	#DIV/0!						Line 15
0		0	#DIV/0!	#DIV/0!
0		0	#DIV/0!	#DIV/0!
																														Km/Vmax (x-axis):	2.7731		Km:	4.82008
																														Standard dev:	0.0151856
Line 1	x	y
	0	1.96078		Slope:	-0.5
	3.92157	0		y-intercept:	1.96078				1/Intercept points y-axis																				1/Intercept points y-axis
										Line 1	Line 2	Line 3	Line 4	Line 5	Line 6	Line 7	Line 8	Line 9	Line 10	Line 11	Line 12	Line 13	Line 14	Line 15						Line 1	Line 2	Line 3	Line 4	Line 5	Line 6	Line 7	Line 8	Line 9	Line 10	Line 11	Line 12	Line 13	Line 14	Line 15
Line 2	x	y							Line 1																				Line 1
	0	1.68634		Slope:	-0.4				Line 2	1.69904																			Line 2	1.69904
	4.21585	0		y-intercept:	1.68634				Line 3	1.73048	1.74999																		Line 3	1.73048	1.74999
									Line 4	1.73596	1.74354	1.74035																	Line 4	1.73596	1.74354	1.74035
Line 3	x	y							Line 5	#DIV/0!	#DIV/0!	#DIV/0!	#DIV/0!																Line 5
	0	1.40845		Slope:	-0.3003				Line 6	#DIV/0!	#DIV/0!	#DIV/0!	#DIV/0!	#DIV/0!															Line 6
	4.69014	0		y-intercept:	1.40845				Line 7	#DIV/0!	#DIV/0!	#DIV/0!	#DIV/0!	#DIV/0!	#DIV/0!														Line 7
									Line 8	#DIV/0!	#DIV/0!	#DIV/0!	#DIV/0!	#DIV/0!	#DIV/0!	#DIV/0!													Line 8
Line 4	x	y							Line 9	#DIV/0!	#DIV/0!	#DIV/0!	#DIV/0!	#DIV/0!	#DIV/0!	#DIV/0!	#DIV/0!												Line 9
	0	1.12994		Slope:	-0.2				Line 10	#DIV/0!	#DIV/0!	#DIV/0!	#DIV/0!	#DIV/0!	#DIV/0!	#DIV/0!	#DIV/0!	#DIV/0!											Line 10
	5.64972	0		y-intercept:	1.12994				Line 11	#DIV/0!	#DIV/0!	#DIV/0!	#DIV/0!	#DIV/0!	#DIV/0!	#DIV/0!	#DIV/0!	#DIV/0!	#DIV/0!										Line 11
									Line 12	#DIV/0!	#DIV/0!	#DIV/0!	#DIV/0!	#DIV/0!	#DIV/0!	#DIV/0!	#DIV/0!	#DIV/0!	#DIV/0!	#DIV/0!									Line 12
Line 5	x	y							Line 13	#DIV/0!	#DIV/0!	#DIV/0!	#DIV/0!	#DIV/0!	#DIV/0!	#DIV/0!	#DIV/0!	#DIV/0!	#DIV/0!	#DIV/0!	#DIV/0!								Line 13
	0	#DIV/0!		Slope:	#VALUE!				Line 14	#DIV/0!	#DIV/0!	#DIV/0!	#DIV/0!	#DIV/0!	#DIV/0!	#DIV/0!	#DIV/0!	#DIV/0!	#DIV/0!	#DIV/0!	#DIV/0!	#DIV/0!							Line 14
	#DIV/0!	0		y-intercept:	#DIV/0!				Line 15	#DIV/0!	#DIV/0!	#DIV/0!	#DIV/0!	#DIV/0!	#DIV/0!	#DIV/0!	#DIV/0!	#DIV/0!	#DIV/0!	#DIV/0!	#DIV/0!	#DIV/0!	#DIV/0!						Line 15
Line 6	x	y
	0	#DIV/0!		Slope:	#VALUE!
	#DIV/0!	0		y-intercept:	#DIV/0!
Line 7	x	y																												Vmax:	1.73816
	0	#DIV/0!		Slope:	#VALUE!																									Standard dev:	0.0180077
	#DIV/0!	0		y-intercept:	#DIV/0!
Line 8	x	y
	0	#DIV/0!		Slope:	#VALUE!
	#DIV/0!	0		y-intercept:	#DIV/0!
Line 9	x	y
	0	#DIV/0!		Slope:	#VALUE!
	#DIV/0!	0		y-intercept:	#DIV/0!
Line 10	x	y
	0	#DIV/0!		Slope:	#VALUE!
	#DIV/0!	0		y-intercept:	#DIV/0!
Line 11	x	y										0	1.96078	1.68634	1.40845	1.12994	#DIV/0!	#DIV/0!	#DIV/0!	#DIV/0!	#DIV/0!	#DIV/0!	#DIV/0!	#DIV/0!	#DIV/0!	#DIV/0!	#DIV/0!	0	0	0	0
	0	#DIV/0!		Slope:	#VALUE!							3.92157	0
	#DIV/0!	0		y-intercept:	#DIV/0!							4.21585		0
												4.69014			0
Line 12	x	y										5.64972				0
	0	#DIV/0!		Slope:	#VALUE!							#DIV/0!					0
	#DIV/0!	0		y-intercept:	#DIV/0!							#DIV/0!						0
												#DIV/0!							0
Line 13	x	y										#DIV/0!								0
	0	#DIV/0!		Slope:	#VALUE!							#DIV/0!									0
	#DIV/0!	0		y-intercept:	#DIV/0!							#DIV/0!										0
												#DIV/0!											0
Line 14	x	y										#DIV/0!												0
	0	#DIV/0!		Slope:	#VALUE!							#DIV/0!													0
	#DIV/0!	0		y-intercept:	#DIV/0!							#DIV/0!														0
												#DIV/0!															0
Line 15	x	y										0																0
	0	#DIV/0!		Slope:	#VALUE!							0																	0
	#DIV/0!	0		y-intercept:	#DIV/0!							0																		0
												0																			0

## Sheet: Part Non-competitive
														(V_max*([S]/K_s )+bV_max*(([S]*[I])/(K_s*K_i )))/((1+([S]/K_s )+([I]/K_i )+(([S]*[I])/(K_s*K_i ))) )									Calculated values
		No Inhibitor	[I]1	[I]2	[I]3	[I]4	[I]5	[I]6	[I]7	[I]8	[I]9	[I]10	[I]11	[I]12	[I]13	[I]14	[I]15						No Inhibitor	[I]1	[I]2	[I]3	[I]4	[I]5	[I]6	[I]7	[I]8	[I]9	[I]10	[I]11	[I]12	[I]13	[I]14	[I]15
		0	1	2	3	4	5	0	0	0	0	0	0	0	0	0	0	Km	Vmax	bVmax	Ki		0	1	2	3	4	5	0	0	0	0	0	0	0	0	0	0
[S]1	2	0.51	0.505	0.502	0.499	0.496	0.493	0	0	0	0	0	0	0	0	0	0	4.56207	1.68392	1.38379	14.6316		0.513227	0.507376	0.502228	0.497663	0.493589	0.48993	#DIV/0!	#DIV/0!	#DIV/0!	#DIV/0!	#DIV/0!	#DIV/0!	#DIV/0!	#DIV/0!	#DIV/0!	#DIV/0!		0.513227	0.507376	0.502228	0.497663	0.493589	0.48993	0	0	0	0
[S]2	2.5	0.593	0.588	0.583	0.579	0.575	0.571	0	0	0	0	0	0	0	0	0	0						0.596113	0.589316	0.583337	0.578036	0.573303	0.569053	#DIV/0!	#DIV/0!	#DIV/0!	#DIV/0!	#DIV/0!	#DIV/0!	#DIV/0!	#DIV/0!	#DIV/0!	#DIV/0!		0.596113	0.589316	0.583337	0.578036	0.573303	0.569053	0	0	0	0
[S]3	3.33	0.71	0.702	0.695	0.689	0.683	0.679	0	0	0	0	0	0	0	0	0	0						0.710516	0.702415	0.695288	0.688969	0.683329	0.678263	#DIV/0!	#DIV/0!	#DIV/0!	#DIV/0!	#DIV/0!	#DIV/0!	#DIV/0!	#DIV/0!	#DIV/0!	#DIV/0!		0.710516	0.702415	0.695288	0.688969	0.683329	0.678263	0	0	0	0
[S]4	5	0.885	0.873	0.862	0.853	0.844	0.837	0	0	0	0	0	0	0	0	0	0						0.880519	0.870479	0.861647	0.853817	0.846827	0.840549	#DIV/0!	#DIV/0!	#DIV/0!	#DIV/0!	#DIV/0!	#DIV/0!	#DIV/0!	#DIV/0!	#DIV/0!	#DIV/0!		0.880519	0.870479	0.861647	0.853817	0.846827	0.840549	0	0	0	0
[S]5	0	0	0	0	0	0	0	0	0	0	0	0	0	0	0	0	0						#DIV/0!	#DIV/0!	#DIV/0!	#DIV/0!	#DIV/0!	#DIV/0!	#DIV/0!	#DIV/0!	#DIV/0!	#DIV/0!	#DIV/0!	#DIV/0!	#DIV/0!	#DIV/0!	#DIV/0!	#DIV/0!		0	0	0	0	0	0	0	0	0	0
[S]6	0	0	0	0	0	0	0	0	0	0	0	0	0	0	0	0	0			Sum R2	0.000101253		#DIV/0!	#DIV/0!	#DIV/0!	#DIV/0!	#DIV/0!	#DIV/0!	#DIV/0!	#DIV/0!	#DIV/0!	#DIV/0!	#DIV/0!	#DIV/0!	#DIV/0!	#DIV/0!	#DIV/0!	#DIV/0!		0	0	0	0	0	0	0	0	0	0
[S]7	0	0	0	0	0	0	0	0	0	0	0	0	0	0	0	0	0			Sum residuals %	0.0615965		#DIV/0!	#DIV/0!	#DIV/0!	#DIV/0!	#DIV/0!	#DIV/0!	#DIV/0!	#DIV/0!	#DIV/0!	#DIV/0!	#DIV/0!	#DIV/0!	#DIV/0!	#DIV/0!	#DIV/0!	#DIV/0!		0	0	0	0	0	0	0	0	0	0
[S]8	0	0	0	0	0	0	0	0	0	0	0	0	0	0	0	0	0						#DIV/0!	#DIV/0!	#DIV/0!	#DIV/0!	#DIV/0!	#DIV/0!	#DIV/0!	#DIV/0!	#DIV/0!	#DIV/0!	#DIV/0!	#DIV/0!	#DIV/0!	#DIV/0!	#DIV/0!	#DIV/0!		0	0	0	0	0	0	0	0	0	0
[S]9	0	0	0	0	0	0	0	0	0	0	0	0	0	0	0	0	0						#DIV/0!	#DIV/0!	#DIV/0!	#DIV/0!	#DIV/0!	#DIV/0!	#DIV/0!	#DIV/0!	#DIV/0!	#DIV/0!	#DIV/0!	#DIV/0!	#DIV/0!	#DIV/0!	#DIV/0!	#DIV/0!		0	0	0	0	0	0	0	0	0	0
[S]10	0	0	0	0	0	0	0	0	0	0	0	0	0	0	0	0	0						#DIV/0!	#DIV/0!	#DIV/0!	#DIV/0!	#DIV/0!	#DIV/0!	#DIV/0!	#DIV/0!	#DIV/0!	#DIV/0!	#DIV/0!	#DIV/0!	#DIV/0!	#DIV/0!	#DIV/0!	#DIV/0!		0	0	0	0	0	0	0	0	0	0
[S]11	0	0	0	0	0	0	0	0	0	0	0	0	0	0	0	0	0						#DIV/0!	#DIV/0!	#DIV/0!	#DIV/0!	#DIV/0!	#DIV/0!	#DIV/0!	#DIV/0!	#DIV/0!	#DIV/0!	#DIV/0!	#DIV/0!	#DIV/0!	#DIV/0!	#DIV/0!	#DIV/0!		0	0	0	0	0	0	0	0	0	0
[S]12	0	0	0	0	0	0	0	0	0	0	0	0	0	0	0	0	0						#DIV/0!	#DIV/0!	#DIV/0!	#DIV/0!	#DIV/0!	#DIV/0!	#DIV/0!	#DIV/0!	#DIV/0!	#DIV/0!	#DIV/0!	#DIV/0!	#DIV/0!	#DIV/0!	#DIV/0!	#DIV/0!		0	0	0	0	0	0	0	0	0	0
[S]13	0	0	0	0	0	0	0	0	0	0	0	0	0	0	0	0	0						#DIV/0!	#DIV/0!	#DIV/0!	#DIV/0!	#DIV/0!	#DIV/0!	#DIV/0!	#DIV/0!	#DIV/0!	#DIV/0!	#DIV/0!	#DIV/0!	#DIV/0!	#DIV/0!	#DIV/0!	#DIV/0!		0	0	0	0	0	0	0	0	0	0
[S]14	0	0	0	0	0	0	0	0	0	0	0	0	0	0	0	0	0						#DIV/0!	#DIV/0!	#DIV/0!	#DIV/0!	#DIV/0!	#DIV/0!	#DIV/0!	#DIV/0!	#DIV/0!	#DIV/0!	#DIV/0!	#DIV/0!	#DIV/0!	#DIV/0!	#DIV/0!	#DIV/0!		0	0	0	0	0	0	0	0	0	0
[S]15	0	0	0	0	0	0	0	0	0	0	0	0	0	0	0	0	0						#DIV/0!	#DIV/0!	#DIV/0!	#DIV/0!	#DIV/0!	#DIV/0!	#DIV/0!	#DIV/0!	#DIV/0!	#DIV/0!	#DIV/0!	#DIV/0!	#DIV/0!	#DIV/0!	#DIV/0!	#DIV/0!		0	0	0	0	0	0	0	0	0	0
	1	1	1	1	1	1	1	#DIV/0!	#DIV/0!	#DIV/0!	#DIV/0!	#DIV/0!	#DIV/0!	#DIV/0!	#DIV/0!	#DIV/0!	#DIV/0!																					2	2	0.513227	0.507376	0.502228	0.497663	0.493589	0.48993	#N/A	#N/A	#N/A	#N/A
	1	1	1	1	1	1	1	#DIV/0!	#DIV/0!	#DIV/0!	#DIV/0!	#DIV/0!	#DIV/0!	#DIV/0!	#DIV/0!	#DIV/0!	#DIV/0!					0.51	0.51	0.513227		0.00322741	0.00322741	1										2.5	2.5	0.596113	0.589316	0.583337	0.578036	0.573303	0.569053	#N/A	#N/A	#N/A	#N/A
	1	1	1	1	1	1	1	#DIV/0!	#DIV/0!	#DIV/0!	#DIV/0!	#DIV/0!	#DIV/0!	#DIV/0!	#DIV/0!	#DIV/0!	#DIV/0!					0.593	0.593	0.596113		0.00311313	0.00311313	1										3.33	3.33	0.710516	0.702415	0.695288	0.688969	0.683329	0.678263	#N/A	#N/A	#N/A	#N/A
	1	1	1	1	1	1	1	#DIV/0!	#DIV/0!	#DIV/0!	#DIV/0!	#DIV/0!	#DIV/0!	#DIV/0!	#DIV/0!	#DIV/0!	#DIV/0!					0.71	0.71	0.710516		0.000516205	0.000516205	1										5	5	0.880519	0.870479	0.861647	0.853817	0.846827	0.840549	#N/A	#N/A	#N/A	#N/A
	#DIV/0!	#DIV/0!	#DIV/0!	#DIV/0!	#DIV/0!	#DIV/0!	#DIV/0!	#DIV/0!	#DIV/0!	#DIV/0!	#DIV/0!	#DIV/0!	#DIV/0!	#DIV/0!	#DIV/0!	#DIV/0!	#DIV/0!					0.885	0.885	0.880519		-0.00448097	-0.00448097	1										#DIV/0!	#N/A	#N/A	#N/A	#N/A	#N/A	#N/A	#N/A	#N/A	#N/A	#N/A	#N/A
	#DIV/0!	#DIV/0!	#DIV/0!	#DIV/0!	#DIV/0!	#DIV/0!	#DIV/0!	#DIV/0!	#DIV/0!	#DIV/0!	#DIV/0!	#DIV/0!	#DIV/0!	#DIV/0!	#DIV/0!	#DIV/0!	#DIV/0!					#DIV/0!	#N/A	#N/A		#DIV/0!		1										#DIV/0!	#N/A	#N/A	#N/A	#N/A	#N/A	#N/A	#N/A	#N/A	#N/A	#N/A	#N/A
	#DIV/0!	#DIV/0!	#DIV/0!	#DIV/0!	#DIV/0!	#DIV/0!	#DIV/0!	#DIV/0!	#DIV/0!	#DIV/0!	#DIV/0!	#DIV/0!	#DIV/0!	#DIV/0!	#DIV/0!	#DIV/0!	#DIV/0!					#DIV/0!	#N/A	#N/A		#DIV/0!		1										#DIV/0!	#N/A	#N/A	#N/A	#N/A	#N/A	#N/A	#N/A	#N/A	#N/A	#N/A	#N/A
	#DIV/0!	#DIV/0!	#DIV/0!	#DIV/0!	#DIV/0!	#DIV/0!	#DIV/0!	#DIV/0!	#DIV/0!	#DIV/0!	#DIV/0!	#DIV/0!	#DIV/0!	#DIV/0!	#DIV/0!	#DIV/0!	#DIV/0!					#DIV/0!	#N/A	#N/A		#DIV/0!		1										#DIV/0!	#N/A	#N/A	#N/A	#N/A	#N/A	#N/A	#N/A	#N/A	#N/A	#N/A	#N/A
	#DIV/0!	#DIV/0!	#DIV/0!	#DIV/0!	#DIV/0!	#DIV/0!	#DIV/0!	#DIV/0!	#DIV/0!	#DIV/0!	#DIV/0!	#DIV/0!	#DIV/0!	#DIV/0!	#DIV/0!	#DIV/0!	#DIV/0!					#DIV/0!	#N/A	#N/A		#DIV/0!		1										#DIV/0!	#N/A	#N/A	#N/A	#N/A	#N/A	#N/A	#N/A	#N/A	#N/A	#N/A	#N/A
	#DIV/0!	#DIV/0!	#DIV/0!	#DIV/0!	#DIV/0!	#DIV/0!	#DIV/0!	#DIV/0!	#DIV/0!	#DIV/0!	#DIV/0!	#DIV/0!	#DIV/0!	#DIV/0!	#DIV/0!	#DIV/0!	#DIV/0!					#DIV/0!	#N/A	#N/A		#DIV/0!		1										#DIV/0!	#N/A	#N/A	#N/A	#N/A	#N/A	#N/A	#N/A	#N/A	#N/A	#N/A	#N/A
	#DIV/0!	#DIV/0!	#DIV/0!	#DIV/0!	#DIV/0!	#DIV/0!	#DIV/0!	#DIV/0!	#DIV/0!	#DIV/0!	#DIV/0!	#DIV/0!	#DIV/0!	#DIV/0!	#DIV/0!	#DIV/0!	#DIV/0!					#DIV/0!	#N/A	#N/A		#DIV/0!		1										#DIV/0!	#N/A	#N/A	#N/A	#N/A	#N/A	#N/A	#N/A	#N/A	#N/A	#N/A	#N/A
	#DIV/0!	#DIV/0!	#DIV/0!	#DIV/0!	#DIV/0!	#DIV/0!	#DIV/0!	#DIV/0!	#DIV/0!	#DIV/0!	#DIV/0!	#DIV/0!	#DIV/0!	#DIV/0!	#DIV/0!	#DIV/0!	#DIV/0!					#DIV/0!	#N/A	#N/A		#DIV/0!		1										#DIV/0!	#N/A	#N/A	#N/A	#N/A	#N/A	#N/A	#N/A	#N/A	#N/A	#N/A	#N/A
	#DIV/0!	#DIV/0!	#DIV/0!	#DIV/0!	#DIV/0!	#DIV/0!	#DIV/0!	#DIV/0!	#DIV/0!	#DIV/0!	#DIV/0!	#DIV/0!	#DIV/0!	#DIV/0!	#DIV/0!	#DIV/0!	#DIV/0!					#DIV/0!	#N/A	#N/A		#DIV/0!		1										#DIV/0!	#N/A	#N/A	#N/A	#N/A	#N/A	#N/A	#N/A	#N/A	#N/A	#N/A	#N/A
	#DIV/0!	#DIV/0!	#DIV/0!	#DIV/0!	#DIV/0!	#DIV/0!	#DIV/0!	#DIV/0!	#DIV/0!	#DIV/0!	#DIV/0!	#DIV/0!	#DIV/0!	#DIV/0!	#DIV/0!	#DIV/0!	#DIV/0!					#DIV/0!	#N/A	#N/A		#DIV/0!		1										#DIV/0!	#N/A	#N/A	#N/A	#N/A	#N/A	#N/A	#N/A	#N/A	#N/A	#N/A	#N/A
	#DIV/0!	#DIV/0!	#DIV/0!	#DIV/0!	#DIV/0!	#DIV/0!	#DIV/0!	#DIV/0!	#DIV/0!	#DIV/0!	#DIV/0!	#DIV/0!	#DIV/0!	#DIV/0!	#DIV/0!	#DIV/0!	#DIV/0!					#DIV/0!	#N/A	#N/A		#DIV/0!		1										#DIV/0!	#N/A	#N/A	#N/A	#N/A	#N/A	#N/A	#N/A	#N/A	#N/A	#N/A	#N/A
																						#DIV/0!	#N/A	#N/A		#DIV/0!		1
		1	1	1	1	1	1	0	0	0	0	0	0	0	0	0	0					0.505	0.505	0.507376		0.00237561	0.00237561	1											0.5	1.94845	1.97093	1.99113	2.00939	2.02598	2.04111	#N/A	#N/A	#N/A	#N/A
		1	1	1	1	1	1	0	0	0	0	0	0	0	0	0	0					0.588	0.588	0.589316		0.00131627	0.00131627	1											0.4	1.67753	1.69688	1.71428	1.73	1.74428	1.7573	#N/A	#N/A	#N/A	#N/A
		1	1	1	1	1	1	0	0	0	0	0	0	0	0	0	0					0.702	0.702	0.702415		0.000414922	0.000414922	1											0.3003	1.40743	1.42366	1.43825	1.45144	1.46342	1.47435	#N/A	#N/A	#N/A	#N/A
		1	1	1	1	1	1	0	0	0	0	0	0	0	0	0	0					0.873	0.873	0.870479		-0.00252062	-0.00252062	1											0.2	1.13569	1.14879	1.16057	1.17121	1.18088	1.1897	#N/A	#N/A	#N/A	#N/A
		0	0	0	0	0	0	0	0	0	0	0	0	0	0	0	0					#DIV/0!	#N/A	#N/A		#DIV/0!		1											#N/A	#N/A	#N/A	#N/A	#N/A	#N/A	#N/A	#N/A	#N/A	#N/A	#N/A
		0	0	0	0	0	0	0	0	0	0	0	0	0	0	0	0					#DIV/0!	#N/A	#N/A		#DIV/0!		1											#N/A	#N/A	#N/A	#N/A	#N/A	#N/A	#N/A	#N/A	#N/A	#N/A	#N/A
		0	0	0	0	0	0	0	0	0	0	0	0	0	0	0	0					#DIV/0!	#N/A	#N/A		#DIV/0!		1											#N/A	#N/A	#N/A	#N/A	#N/A	#N/A	#N/A	#N/A	#N/A	#N/A	#N/A
		0	0	0	0	0	0	0	0	0	0	0	0	0	0	0	0					#DIV/0!	#N/A	#N/A		#DIV/0!		1											#N/A	#N/A	#N/A	#N/A	#N/A	#N/A	#N/A	#N/A	#N/A	#N/A	#N/A
		0	0	0	0	0	0	0	0	0	0	0	0	0	0	0	0					#DIV/0!	#N/A	#N/A		#DIV/0!		1											#N/A	#N/A	#N/A	#N/A	#N/A	#N/A	#N/A	#N/A	#N/A	#N/A	#N/A
		0	0	0	0	0	0	0	0	0	0	0	0	0	0	0	0					#DIV/0!	#N/A	#N/A		#DIV/0!		1											#N/A	#N/A	#N/A	#N/A	#N/A	#N/A	#N/A	#N/A	#N/A	#N/A	#N/A
		0	0	0	0	0	0	0	0	0	0	0	0	0	0	0	0					#DIV/0!	#N/A	#N/A		#DIV/0!		1											#N/A	#N/A	#N/A	#N/A	#N/A	#N/A	#N/A	#N/A	#N/A	#N/A	#N/A
		0	0	0	0	0	0	0	0	0	0	0	0	0	0	0	0					#DIV/0!	#N/A	#N/A		#DIV/0!		1											#N/A	#N/A	#N/A	#N/A	#N/A	#N/A	#N/A	#N/A	#N/A	#N/A	#N/A
		0	0	0	0	0	0	0	0	0	0	0	0	0	0	0	0					#DIV/0!	#N/A	#N/A		#DIV/0!		1											#N/A	#N/A	#N/A	#N/A	#N/A	#N/A	#N/A	#N/A	#N/A	#N/A	#N/A
		0	0	0	0	0	0	0	0	0	0	0	0	0	0	0	0					#DIV/0!	#N/A	#N/A		#DIV/0!		1											#N/A	#N/A	#N/A	#N/A	#N/A	#N/A	#N/A	#N/A	#N/A	#N/A	#N/A
		0	0	0	0	0	0	0	0	0	0	0	0	0	0	0	0					#DIV/0!	#N/A	#N/A		#DIV/0!		1											#N/A	#N/A	#N/A	#N/A	#N/A	#N/A	#N/A	#N/A	#N/A	#N/A	#N/A
																						0.502	0.502	0.502228		0.000227504	0.000227504	1
n	24																					0.583	0.583	0.583337		0.000336748	0.000336748	1												0.51	0.505	0.502	0.499	0.496	0.493	#DIV/0!	#DIV/0!	#DIV/0!	#DIV/0!
																						0.695	0.695	0.695288		0.000287844	0.000287844	1												0.593	0.588	0.583	0.579	0.575	0.571	#DIV/0!	#DIV/0!	#DIV/0!	#DIV/0!
																						0.862	0.862	0.861647		-0.000352968	-0.000352968	1												0.71	0.702	0.695	0.689	0.683	0.679	#DIV/0!	#DIV/0!	#DIV/0!	#DIV/0!
																						#DIV/0!	#N/A	#N/A		#DIV/0!		1												0.885	0.873	0.862	0.853	0.844	0.837	#DIV/0!	#DIV/0!	#DIV/0!	#DIV/0!
																						#DIV/0!	#N/A	#N/A		#DIV/0!		1												#DIV/0!	#DIV/0!	#DIV/0!	#DIV/0!	#DIV/0!	#DIV/0!	#DIV/0!	#DIV/0!	#DIV/0!	#DIV/0!
																						#DIV/0!	#N/A	#N/A		#DIV/0!		1												#DIV/0!	#DIV/0!	#DIV/0!	#DIV/0!	#DIV/0!	#DIV/0!	#DIV/0!	#DIV/0!	#DIV/0!	#DIV/0!
																						#DIV/0!	#N/A	#N/A		#DIV/0!		1												#DIV/0!	#DIV/0!	#DIV/0!	#DIV/0!	#DIV/0!	#DIV/0!	#DIV/0!	#DIV/0!	#DIV/0!	#DIV/0!
																						#DIV/0!	#N/A	#N/A		#DIV/0!		1												#DIV/0!	#DIV/0!	#DIV/0!	#DIV/0!	#DIV/0!	#DIV/0!	#DIV/0!	#DIV/0!	#DIV/0!	#DIV/0!
																						#DIV/0!	#N/A	#N/A		#DIV/0!		1												#DIV/0!	#DIV/0!	#DIV/0!	#DIV/0!	#DIV/0!	#DIV/0!	#DIV/0!	#DIV/0!	#DIV/0!	#DIV/0!
																						#DIV/0!	#N/A	#N/A		#DIV/0!		1												#DIV/0!	#DIV/0!	#DIV/0!	#DIV/0!	#DIV/0!	#DIV/0!	#DIV/0!	#DIV/0!	#DIV/0!	#DIV/0!
																						#DIV/0!	#N/A	#N/A		#DIV/0!		1												#DIV/0!	#DIV/0!	#DIV/0!	#DIV/0!	#DIV/0!	#DIV/0!	#DIV/0!	#DIV/0!	#DIV/0!	#DIV/0!
																						#DIV/0!	#N/A	#N/A		#DIV/0!		1												#DIV/0!	#DIV/0!	#DIV/0!	#DIV/0!	#DIV/0!	#DIV/0!	#DIV/0!	#DIV/0!	#DIV/0!	#DIV/0!
																						#DIV/0!	#N/A	#N/A		#DIV/0!		1												#DIV/0!	#DIV/0!	#DIV/0!	#DIV/0!	#DIV/0!	#DIV/0!	#DIV/0!	#DIV/0!	#DIV/0!	#DIV/0!
																						#DIV/0!	#N/A	#N/A		#DIV/0!		1												#DIV/0!	#DIV/0!	#DIV/0!	#DIV/0!	#DIV/0!	#DIV/0!	#DIV/0!	#DIV/0!	#DIV/0!	#DIV/0!
																						0.499	0.499	0.497663		-0.00133664	-0.00133664	1												#DIV/0!	#DIV/0!	#DIV/0!	#DIV/0!	#DIV/0!	#DIV/0!	#DIV/0!	#DIV/0!	#DIV/0!	#DIV/0!
																						0.579	0.579	0.578036		-0.000964496	-0.000964496	1
																						0.689	0.689	0.688969		-3.07886e-05	-3.07886e-05	1												1/s	0	1	2	3	4	5	0	0	0
																						0.853	0.853	0.853817		0.000816562	0.000816562	1											1	0.5	1.94845	1.97093	1.99113	2.00939	2.02598	2.04111	#N/A	#N/A	#N/A
																						#DIV/0!	#N/A	#N/A		#DIV/0!		1											2	0.4	1.67753	1.69688	1.71428	1.73	1.74428	1.7573	#N/A	#N/A	#N/A
																						#DIV/0!	#N/A	#N/A		#DIV/0!		1											3	0.3003	1.40743	1.42366	1.43825	1.45144	1.46342	1.47435	#N/A	#N/A	#N/A
																						#DIV/0!	#N/A	#N/A		#DIV/0!		1											4	0.2	1.13569	1.14879	1.16057	1.17121	1.18088	1.1897	#N/A	#N/A	#N/A
																						#DIV/0!	#N/A	#N/A		#DIV/0!		1											5	#N/A	#N/A	#N/A	#N/A	#N/A	#N/A	#N/A	#N/A	#N/A	#N/A
																						#DIV/0!	#N/A	#N/A		#DIV/0!		1											6	#N/A	#N/A	#N/A	#N/A	#N/A	#N/A	#N/A	#N/A	#N/A	#N/A
																						#DIV/0!	#N/A	#N/A		#DIV/0!		1											7	#N/A	#N/A	#N/A	#N/A	#N/A	#N/A	#N/A	#N/A	#N/A	#N/A
																						#DIV/0!	#N/A	#N/A		#DIV/0!		1											8	#N/A	#N/A	#N/A	#N/A	#N/A	#N/A	#N/A	#N/A	#N/A	#N/A
																						#DIV/0!	#N/A	#N/A		#DIV/0!		1											9	#N/A	#N/A	#N/A	#N/A	#N/A	#N/A	#N/A	#N/A	#N/A	#N/A
																						#DIV/0!	#N/A	#N/A		#DIV/0!		1											10	#N/A	#N/A	#N/A	#N/A	#N/A	#N/A	#N/A	#N/A	#N/A	#N/A
																						#DIV/0!	#N/A	#N/A		#DIV/0!		1											11	#N/A	#N/A	#N/A	#N/A	#N/A	#N/A	#N/A	#N/A	#N/A	#N/A
																						#DIV/0!	#N/A	#N/A		#DIV/0!		1											12	#N/A	#N/A	#N/A	#N/A	#N/A	#N/A	#N/A	#N/A	#N/A	#N/A
																						0.496	0.496	0.493589		-0.00241084	-0.00241084	1											13	#N/A	#N/A	#N/A	#N/A	#N/A	#N/A	#N/A	#N/A	#N/A	#N/A
																						0.575	0.575	0.573303		-0.00169668	-0.00169668	1											14	#N/A	#N/A	#N/A	#N/A	#N/A	#N/A	#N/A	#N/A	#N/A	#N/A
																						0.683	0.683	0.683329		0.00032885	0.00032885	1											15	#N/A	#N/A	#N/A	#N/A	#N/A	#N/A	#N/A	#N/A	#N/A	#N/A
																						0.844	0.844	0.846827		0.00282665	0.00282665	1
																						#DIV/0!	#N/A	#N/A		#DIV/0!		1
																						#DIV/0!	#N/A	#N/A		#DIV/0!		1
																						#DIV/0!	#N/A	#N/A		#DIV/0!		1
																						#DIV/0!	#N/A	#N/A		#DIV/0!		1
																						#DIV/0!	#N/A	#N/A		#DIV/0!		1
																						#DIV/0!	#N/A	#N/A		#DIV/0!		1
																						#DIV/0!	#N/A	#N/A		#DIV/0!		1
																						#DIV/0!	#N/A	#N/A		#DIV/0!		1
																						#DIV/0!	#N/A	#N/A		#DIV/0!		1
																						#DIV/0!	#N/A	#N/A		#DIV/0!		1
																						#DIV/0!	#N/A	#N/A		#DIV/0!		1
																						0.493	0.493	0.48993		-0.00306998	-0.00306998	1
																						0.571	0.571	0.569053		-0.00194676	-0.00194676	1
																						0.679	0.679	0.678263		-0.00073689	-0.00073689	1
																						0.837	0.837	0.840549		0.00354885	0.00354885	1
																						#DIV/0!	#N/A	#N/A		#DIV/0!		1
																						#DIV/0!	#N/A	#N/A		#DIV/0!		1
																						#DIV/0!	#N/A	#N/A		#DIV/0!		1
																						#DIV/0!	#N/A	#N/A		#DIV/0!		1
																						#DIV/0!	#N/A	#N/A		#DIV/0!		1
																						#DIV/0!	#N/A	#N/A		#DIV/0!		1
																						#DIV/0!	#N/A	#N/A		#DIV/0!		1
																						#DIV/0!	#N/A	#N/A		#DIV/0!		1
																						#DIV/0!	#N/A	#N/A		#DIV/0!		1
																						#DIV/0!	#N/A	#N/A		#DIV/0!		1
																						#DIV/0!	#N/A	#N/A		#DIV/0!		1
																						#DIV/0!	#N/A	#N/A		#DIV/0!		1
																						#DIV/0!	#N/A	#N/A		#DIV/0!		1
																						#DIV/0!	#N/A	#N/A		#DIV/0!		1
																						#DIV/0!	#N/A	#N/A		#DIV/0!		1
																						#DIV/0!	#N/A	#N/A		#DIV/0!		1
																						#DIV/0!	#N/A	#N/A		#DIV/0!		1
																						#DIV/0!	#N/A	#N/A		#DIV/0!		1
																						#DIV/0!	#N/A	#N/A		#DIV/0!		1
																						#DIV/0!	#N/A	#N/A		#DIV/0!		1
																						#DIV/0!	#N/A	#N/A		#DIV/0!		1
																						#DIV/0!	#N/A	#N/A		#DIV/0!		1
																						#DIV/0!	#N/A	#N/A		#DIV/0!		1
																						#DIV/0!	#N/A	#N/A		#DIV/0!		1
																						#DIV/0!	#N/A	#N/A		#DIV/0!		1
																						#DIV/0!	#N/A	#N/A		#DIV/0!		1
																						#DIV/0!	#N/A	#N/A		#DIV/0!		1
																						#DIV/0!	#N/A	#N/A		#DIV/0!		1
																						#DIV/0!	#N/A	#N/A		#DIV/0!		1
																						#DIV/0!	#N/A	#N/A		#DIV/0!		1
																						#DIV/0!	#N/A	#N/A		#DIV/0!		1
																						#DIV/0!	#N/A	#N/A		#DIV/0!		1
																						#DIV/0!	#N/A	#N/A		#DIV/0!		1
																						#DIV/0!	#N/A	#N/A		#DIV/0!		1
																						#DIV/0!	#N/A	#N/A		#DIV/0!		1
																						#DIV/0!	#N/A	#N/A		#DIV/0!		1
																						#DIV/0!	#N/A	#N/A		#DIV/0!		1
																						#DIV/0!	#N/A	#N/A		#DIV/0!		1
																						#DIV/0!	#N/A	#N/A		#DIV/0!		1
																						#DIV/0!	#N/A	#N/A		#DIV/0!		1
																						#DIV/0!	#N/A	#N/A		#DIV/0!		1
																						#DIV/0!	#N/A	#N/A		#DIV/0!		1
																						#DIV/0!	#N/A	#N/A		#DIV/0!		1
																						#DIV/0!	#N/A	#N/A		#DIV/0!		1
																						#DIV/0!	#N/A	#N/A		#DIV/0!		1
																						#DIV/0!	#N/A	#N/A		#DIV/0!		1
																						#DIV/0!	#N/A	#N/A		#DIV/0!		1
																						#DIV/0!	#N/A	#N/A		#DIV/0!		1
																						#DIV/0!	#N/A	#N/A		#DIV/0!		1
																						#DIV/0!	#N/A	#N/A		#DIV/0!		1
																						#DIV/0!	#N/A	#N/A		#DIV/0!		1
																						#DIV/0!	#N/A	#N/A		#DIV/0!		1
																						#DIV/0!	#N/A	#N/A		#DIV/0!		1
																						#DIV/0!	#N/A	#N/A		#DIV/0!		1
																						#DIV/0!	#N/A	#N/A		#DIV/0!		1
																						#DIV/0!	#N/A	#N/A		#DIV/0!		1
																						#DIV/0!	#N/A	#N/A		#DIV/0!		1
																						#DIV/0!	#N/A	#N/A		#DIV/0!		1
																						#DIV/0!	#N/A	#N/A		#DIV/0!		1
																						#DIV/0!	#N/A	#N/A		#DIV/0!		1
																						#DIV/0!	#N/A	#N/A		#DIV/0!		1
																						#DIV/0!	#N/A	#N/A		#DIV/0!		1
																						#DIV/0!	#N/A	#N/A		#DIV/0!		1
																						#DIV/0!	#N/A	#N/A		#DIV/0!		1
																						#DIV/0!	#N/A	#N/A		#DIV/0!		1
																						#DIV/0!	#N/A	#N/A		#DIV/0!		1
																						#DIV/0!	#N/A	#N/A		#DIV/0!		1
																						#DIV/0!	#N/A	#N/A		#DIV/0!		1
																						#DIV/0!	#N/A	#N/A		#DIV/0!		1
																						#DIV/0!	#N/A	#N/A		#DIV/0!		1
																						#DIV/0!	#N/A	#N/A		#DIV/0!		1
																						#DIV/0!	#N/A	#N/A		#DIV/0!		1
																						#DIV/0!	#N/A	#N/A		#DIV/0!		1
																						#DIV/0!	#N/A	#N/A		#DIV/0!		1
																						#DIV/0!	#N/A	#N/A		#DIV/0!		1
																						#DIV/0!	#N/A	#N/A		#DIV/0!		1
																						#DIV/0!	#N/A	#N/A		#DIV/0!		1
																						#DIV/0!	#N/A	#N/A		#DIV/0!		1
																						#DIV/0!	#N/A	#N/A		#DIV/0!		1
																						#DIV/0!	#N/A	#N/A		#DIV/0!		1
																						#DIV/0!	#N/A	#N/A		#DIV/0!		1
																						#DIV/0!	#N/A	#N/A		#DIV/0!		1
																						#DIV/0!	#N/A	#N/A		#DIV/0!		1
																						#DIV/0!	#N/A	#N/A		#DIV/0!		1
																						#DIV/0!	#N/A	#N/A		#DIV/0!		1
																						#DIV/0!	#N/A	#N/A		#DIV/0!		1
																						#DIV/0!	#N/A	#N/A		#DIV/0!		1
																						#DIV/0!	#N/A	#N/A		#DIV/0!		1
																						#DIV/0!	#N/A	#N/A		#DIV/0!		1
																						#DIV/0!	#N/A	#N/A		#DIV/0!		1
																						#DIV/0!	#N/A	#N/A		#DIV/0!		1
																						#DIV/0!	#N/A	#N/A		#DIV/0!		1
																						#DIV/0!	#N/A	#N/A		#DIV/0!		1
																						#DIV/0!	#N/A	#N/A		#DIV/0!		1
																						#DIV/0!	#N/A	#N/A		#DIV/0!		1
																						#DIV/0!	#N/A	#N/A		#DIV/0!		1
																						#DIV/0!	#N/A	#N/A		#DIV/0!		1
																						#DIV/0!	#N/A	#N/A		#DIV/0!		1
																						#DIV/0!	#N/A	#N/A		#DIV/0!		1
																						#DIV/0!	#N/A	#N/A		#DIV/0!		1
																						#DIV/0!	#N/A	#N/A		#DIV/0!		1
																						#DIV/0!	#N/A	#N/A		#DIV/0!		1
																						#DIV/0!	#N/A	#N/A		#DIV/0!		1
																						#DIV/0!	#N/A	#N/A		#DIV/0!		1
																						#DIV/0!	#N/A	#N/A		#DIV/0!		1
																						#DIV/0!	#N/A	#N/A		#DIV/0!		1
																						#DIV/0!	#N/A	#N/A		#DIV/0!		1
																						#DIV/0!	#N/A	#N/A		#DIV/0!		1
																						#DIV/0!	#N/A	#N/A		#DIV/0!		1
																						#DIV/0!	#N/A	#N/A		#DIV/0!		1
																						#DIV/0!	#N/A	#N/A		#DIV/0!		1
																						#DIV/0!	#N/A	#N/A		#DIV/0!		1
																						#DIV/0!	#N/A	#N/A		#DIV/0!		1
																						#DIV/0!	#N/A	#N/A		#DIV/0!		1
																						#DIV/0!	#N/A	#N/A		#DIV/0!		1
																						#DIV/0!	#N/A	#N/A		#DIV/0!		1
																						#DIV/0!	#N/A	#N/A		#DIV/0!		1
																						#DIV/0!	#N/A	#N/A		#DIV/0!		1
																						#DIV/0!	#N/A	#N/A		#DIV/0!		1
																						#DIV/0!	#N/A	#N/A		#DIV/0!		1
																						#DIV/0!	#N/A	#N/A		#DIV/0!		1
																						#DIV/0!	#N/A	#N/A		#DIV/0!		1
																						#DIV/0!	#N/A	#N/A		#DIV/0!		1
																						#DIV/0!	#N/A	#N/A		#DIV/0!		1
																						#DIV/0!	#N/A	#N/A		#DIV/0!		1
																						#DIV/0!	#N/A	#N/A		#DIV/0!		1
																						#DIV/0!	#N/A	#N/A		#DIV/0!		1
																						#DIV/0!	#N/A	#N/A		#DIV/0!		1
																						#DIV/0!	#N/A	#N/A		#DIV/0!		1
																						#DIV/0!	#N/A	#N/A		#DIV/0!		1
																						#DIV/0!	#N/A	#N/A		#DIV/0!		1
																						#DIV/0!	#N/A	#N/A		#DIV/0!		1
																						#DIV/0!	#N/A	#N/A		#DIV/0!		1
																						#DIV/0!	#N/A	#N/A		#DIV/0!		1
																						#DIV/0!	#N/A	#N/A		#DIV/0!		1
																						#DIV/0!	#N/A	#N/A		#DIV/0!		1
																						#DIV/0!	#N/A	#N/A		#DIV/0!		1
																						#DIV/0!	#N/A	#N/A		#DIV/0!		1
																						#DIV/0!	#N/A	#N/A		#DIV/0!		1
																						#DIV/0!	#N/A	#N/A		#DIV/0!		1
																						#DIV/0!	#N/A	#N/A		#DIV/0!		1
																						#DIV/0!	#N/A	#N/A		#DIV/0!		1
																						#DIV/0!	#N/A	#N/A		#DIV/0!		1
																						#DIV/0!	#N/A	#N/A		#DIV/0!		1
																						#DIV/0!	#N/A	#N/A		#DIV/0!		1
																						#DIV/0!	#N/A	#N/A		#DIV/0!		1
																						#DIV/0!	#N/A	#N/A		#DIV/0!		1
																						#DIV/0!	#N/A	#N/A		#DIV/0!		1
																						#DIV/0!	#N/A	#N/A		#DIV/0!		1
																						#DIV/0!	#N/A	#N/A		#DIV/0!		1
																						#DIV/0!	#N/A	#N/A		#DIV/0!		1
																						#DIV/0!	#N/A	#N/A		#DIV/0!		1
																						#DIV/0!	#N/A	#N/A		#DIV/0!		1
																						#DIV/0!	#N/A	#N/A		#DIV/0!		1
																						#DIV/0!	#N/A	#N/A		#DIV/0!		1
																						#DIV/0!	#N/A	#N/A		#DIV/0!		1
																						#DIV/0!	#N/A	#N/A		#DIV/0!		1
																						#DIV/0!	#N/A	#N/A		#DIV/0!		1
																						#DIV/0!	#N/A	#N/A		#DIV/0!		1
																						#DIV/0!	#N/A	#N/A		#DIV/0!		1
																						#DIV/0!	#N/A	#N/A		#DIV/0!		1
[truncated: 54 more columns]

## Sheet: Partial Competitive
																V_max*(([S]/K_s )+([S]/(aK_s*K_i )))/((1+([S]/K_s )+([I]/K_i )+(([S]*[I])/(aK_s*K_i ))) )							Calculated values
		No Inhibitor	[I]1	[I]2	[I]3	[I]4	[I]5	[I]6	[I]7	[I]8	[I]9	[I]10	[I]11	[I]12	[I]13	[I]14	[I]15						No Inhibitor	[I]1	[I]2	[I]3	[I]4	[I]5	[I]6	[I]7	[I]8	[I]9	[I]10	[I]11	[I]12	[I]13	[I]14	[I]15
		0	1	2	3	4	5	0	0	0	0	0	0	0	0	0	0	Km	aKm	Vmax	Ki		0	1	2	3	4	5	0	0	0	0	0	0	0	0	0	0
[S]1	2	0.51	0.505	0.502	0.499	0.496	0.493	0	0	0	0	0	0	0	0	0	0	4.79802	0.108072	1.6935	2023.12		0.509168	0.505727	0.502332	0.498982	0.495676	0.492414	#DIV/0!	#DIV/0!	#DIV/0!	#DIV/0!	#DIV/0!	#DIV/0!	#DIV/0!	#DIV/0!	#DIV/0!	#DIV/0!		0.509168	0.505727	0.502332	0.498982	0.495676	0.492414	0	0	0	0
[S]2	2.5	0.593	0.588	0.583	0.579	0.575	0.571	0	0	0	0	0	0	0	0	0	0						0.592855	0.588242	0.5837	0.579228	0.574824	0.570486	#DIV/0!	#DIV/0!	#DIV/0!	#DIV/0!	#DIV/0!	#DIV/0!	#DIV/0!	#DIV/0!	#DIV/0!	#DIV/0!		0.592855	0.588242	0.5837	0.579228	0.574824	0.570486	0	0	0	0
[S]3	3.33	0.71	0.702	0.695	0.689	0.683	0.679	0	0	0	0	0	0	0	0	0	0						0.709044	0.702523	0.696121	0.689834	0.68366	0.677596	#DIV/0!	#DIV/0!	#DIV/0!	#DIV/0!	#DIV/0!	#DIV/0!	#DIV/0!	#DIV/0!	#DIV/0!	#DIV/0!		0.709044	0.702523	0.696121	0.689834	0.68366	0.677596	0	0	0	0
[S]4	5	0.885	0.873	0.862	0.853	0.844	0.837	0	0	0	0	0	0	0	0	0	0						0.883172	0.873183	0.863417	0.853866	0.844525	0.835386	#DIV/0!	#DIV/0!	#DIV/0!	#DIV/0!	#DIV/0!	#DIV/0!	#DIV/0!	#DIV/0!	#DIV/0!	#DIV/0!		0.883172	0.873183	0.863417	0.853866	0.844525	0.835386	0	0	0	0
[S]5	0	0	0	0	0	0	0	0	0	0	0	0	0	0	0	0	0						#DIV/0!	#DIV/0!	#DIV/0!	#DIV/0!	#DIV/0!	#DIV/0!	#DIV/0!	#DIV/0!	#DIV/0!	#DIV/0!	#DIV/0!	#DIV/0!	#DIV/0!	#DIV/0!	#DIV/0!	#DIV/0!		0	0	0	0	0	0	0	0	0	0
[S]6	0	0	0	0	0	0	0	0	0	0	0	0	0	0	0	0	0			Sum R2	1.72548e-05		#DIV/0!	#DIV/0!	#DIV/0!	#DIV/0!	#DIV/0!	#DIV/0!	#DIV/0!	#DIV/0!	#DIV/0!	#DIV/0!	#DIV/0!	#DIV/0!	#DIV/0!	#DIV/0!	#DIV/0!	#DIV/0!		0	0	0	0	0	0	0	0	0	0
[S]7	0	0	0	0	0	0	0	0	0	0	0	0	0	0	0	0	0			Sum residuals %	0.0245068		#DIV/0!	#DIV/0!	#DIV/0!	#DIV/0!	#DIV/0!	#DIV/0!	#DIV/0!	#DIV/0!	#DIV/0!	#DIV/0!	#DIV/0!	#DIV/0!	#DIV/0!	#DIV/0!	#DIV/0!	#DIV/0!		0	0	0	0	0	0	0	0	0	0
[S]8	0	0	0	0	0	0	0	0	0	0	0	0	0	0	0	0	0						#DIV/0!	#DIV/0!	#DIV/0!	#DIV/0!	#DIV/0!	#DIV/0!	#DIV/0!	#DIV/0!	#DIV/0!	#DIV/0!	#DIV/0!	#DIV/0!	#DIV/0!	#DIV/0!	#DIV/0!	#DIV/0!		0	0	0	0	0	0	0	0	0	0
[S]9	0	0	0	0	0	0	0	0	0	0	0	0	0	0	0	0	0						#DIV/0!	#DIV/0!	#DIV/0!	#DIV/0!	#DIV/0!	#DIV/0!	#DIV/0!	#DIV/0!	#DIV/0!	#DIV/0!	#DIV/0!	#DIV/0!	#DIV/0!	#DIV/0!	#DIV/0!	#DIV/0!		0	0	0	0	0	0	0	0	0	0
[S]10	0	0	0	0	0	0	0	0	0	0	0	0	0	0	0	0	0						#DIV/0!	#DIV/0!	#DIV/0!	#DIV/0!	#DIV/0!	#DIV/0!	#DIV/0!	#DIV/0!	#DIV/0!	#DIV/0!	#DIV/0!	#DIV/0!	#DIV/0!	#DIV/0!	#DIV/0!	#DIV/0!		0	0	0	0	0	0	0	0	0	0
[S]11	0	0	0	0	0	0	0	0	0	0	0	0	0	0	0	0	0						#DIV/0!	#DIV/0!	#DIV/0!	#DIV/0!	#DIV/0!	#DIV/0!	#DIV/0!	#DIV/0!	#DIV/0!	#DIV/0!	#DIV/0!	#DIV/0!	#DIV/0!	#DIV/0!	#DIV/0!	#DIV/0!		0	0	0	0	0	0	0	0	0	0
[S]12	0	0	0	0	0	0	0	0	0	0	0	0	0	0	0	0	0						#DIV/0!	#DIV/0!	#DIV/0!	#DIV/0!	#DIV/0!	#DIV/0!	#DIV/0!	#DIV/0!	#DIV/0!	#DIV/0!	#DIV/0!	#DIV/0!	#DIV/0!	#DIV/0!	#DIV/0!	#DIV/0!		0	0	0	0	0	0	0	0	0	0
[S]13	0	0	0	0	0	0	0	0	0	0	0	0	0	0	0	0	0						#DIV/0!	#DIV/0!	#DIV/0!	#DIV/0!	#DIV/0!	#DIV/0!	#DIV/0!	#DIV/0!	#DIV/0!	#DIV/0!	#DIV/0!	#DIV/0!	#DIV/0!	#DIV/0!	#DIV/0!	#DIV/0!		0	0	0	0	0	0	0	0	0	0
[S]14	0	0	0	0	0	0	0	0	0	0	0	0	0	0	0	0	0						#DIV/0!	#DIV/0!	#DIV/0!	#DIV/0!	#DIV/0!	#DIV/0!	#DIV/0!	#DIV/0!	#DIV/0!	#DIV/0!	#DIV/0!	#DIV/0!	#DIV/0!	#DIV/0!	#DIV/0!	#DIV/0!		0	0	0	0	0	0	0	0	0	0
[S]15	0	0	0	0	0	0	0	0	0	0	0	0	0	0	0	0	0						#DIV/0!	#DIV/0!	#DIV/0!	#DIV/0!	#DIV/0!	#DIV/0!	#DIV/0!	#DIV/0!	#DIV/0!	#DIV/0!	#DIV/0!	#DIV/0!	#DIV/0!	#DIV/0!	#DIV/0!	#DIV/0!		0	0	0	0	0	0	0	0	0	0
	1	1	1	1	1	1	1	#DIV/0!	#DIV/0!	#DIV/0!	#DIV/0!	#DIV/0!	#DIV/0!	#DIV/0!	#DIV/0!	#DIV/0!	#DIV/0!																					2	2	0.509168	0.505727	0.502332	0.498982	0.495676	0.492414	#N/A	#N/A	#N/A	#N/A
	1	1	1	1	1	1	1	#DIV/0!	#DIV/0!	#DIV/0!	#DIV/0!	#DIV/0!	#DIV/0!	#DIV/0!	#DIV/0!	#DIV/0!	#DIV/0!					0.51	0.51	0.509168		-0.000831647	-0.000831647	2										2.5	2.5	0.592855	0.588242	0.5837	0.579228	0.574824	0.570486	#N/A	#N/A	#N/A	#N/A
	1	1	1	1	1	1	1	#DIV/0!	#DIV/0!	#DIV/0!	#DIV/0!	#DIV/0!	#DIV/0!	#DIV/0!	#DIV/0!	#DIV/0!	#DIV/0!					0.593	0.593	0.592855		-0.000144578	-0.000144578	2										3.33	3.33	0.709044	0.702523	0.696121	0.689834	0.68366	0.677596	#N/A	#N/A	#N/A	#N/A
	1	1	1	1	1	1	1	#DIV/0!	#DIV/0!	#DIV/0!	#DIV/0!	#DIV/0!	#DIV/0!	#DIV/0!	#DIV/0!	#DIV/0!	#DIV/0!					0.71	0.71	0.709044		-0.000955822	-0.000955822	2										5	5	0.883172	0.873183	0.863417	0.853866	0.844525	0.835386	#N/A	#N/A	#N/A	#N/A
	#DIV/0!	#DIV/0!	#DIV/0!	#DIV/0!	#DIV/0!	#DIV/0!	#DIV/0!	#DIV/0!	#DIV/0!	#DIV/0!	#DIV/0!	#DIV/0!	#DIV/0!	#DIV/0!	#DIV/0!	#DIV/0!	#DIV/0!					0.885	0.885	0.883172		-0.0018276	-0.0018276	2										#DIV/0!	#N/A	#N/A	#N/A	#N/A	#N/A	#N/A	#N/A	#N/A	#N/A	#N/A	#N/A
	#DIV/0!	#DIV/0!	#DIV/0!	#DIV/0!	#DIV/0!	#DIV/0!	#DIV/0!	#DIV/0!	#DIV/0!	#DIV/0!	#DIV/0!	#DIV/0!	#DIV/0!	#DIV/0!	#DIV/0!	#DIV/0!	#DIV/0!					#DIV/0!	#N/A	#N/A		#DIV/0!		2										#DIV/0!	#N/A	#N/A	#N/A	#N/A	#N/A	#N/A	#N/A	#N/A	#N/A	#N/A	#N/A
	#DIV/0!	#DIV/0!	#DIV/0!	#DIV/0!	#DIV/0!	#DIV/0!	#DIV/0!	#DIV/0!	#DIV/0!	#DIV/0!	#DIV/0!	#DIV/0!	#DIV/0!	#DIV/0!	#DIV/0!	#DIV/0!	#DIV/0!					#DIV/0!	#N/A	#N/A		#DIV/0!		2										#DIV/0!	#N/A	#N/A	#N/A	#N/A	#N/A	#N/A	#N/A	#N/A	#N/A	#N/A	#N/A
	#DIV/0!	#DIV/0!	#DIV/0!	#DIV/0!	#DIV/0!	#DIV/0!	#DIV/0!	#DIV/0!	#DIV/0!	#DIV/0!	#DIV/0!	#DIV/0!	#DIV/0!	#DIV/0!	#DIV/0!	#DIV/0!	#DIV/0!					#DIV/0!	#N/A	#N/A		#DIV/0!		2										#DIV/0!	#N/A	#N/A	#N/A	#N/A	#N/A	#N/A	#N/A	#N/A	#N/A	#N/A	#N/A
	#DIV/0!	#DIV/0!	#DIV/0!	#DIV/0!	#DIV/0!	#DIV/0!	#DIV/0!	#DIV/0!	#DIV/0!	#DIV/0!	#DIV/0!	#DIV/0!	#DIV/0!	#DIV/0!	#DIV/0!	#DIV/0!	#DIV/0!					#DIV/0!	#N/A	#N/A		#DIV/0!		2										#DIV/0!	#N/A	#N/A	#N/A	#N/A	#N/A	#N/A	#N/A	#N/A	#N/A	#N/A	#N/A
	#DIV/0!	#DIV/0!	#DIV/0!	#DIV/0!	#DIV/0!	#DIV/0!	#DIV/0!	#DIV/0!	#DIV/0!	#DIV/0!	#DIV/0!	#DIV/0!	#DIV/0!	#DIV/0!	#DIV/0!	#DIV/0!	#DIV/0!					#DIV/0!	#N/A	#N/A		#DIV/0!		2										#DIV/0!	#N/A	#N/A	#N/A	#N/A	#N/A	#N/A	#N/A	#N/A	#N/A	#N/A	#N/A
	#DIV/0!	#DIV/0!	#DIV/0!	#DIV/0!	#DIV/0!	#DIV/0!	#DIV/0!	#DIV/0!	#DIV/0!	#DIV/0!	#DIV/0!	#DIV/0!	#DIV/0!	#DIV/0!	#DIV/0!	#DIV/0!	#DIV/0!					#DIV/0!	#N/A	#N/A		#DIV/0!		2										#DIV/0!	#N/A	#N/A	#N/A	#N/A	#N/A	#N/A	#N/A	#N/A	#N/A	#N/A	#N/A
	#DIV/0!	#DIV/0!	#DIV/0!	#DIV/0!	#DIV/0!	#DIV/0!	#DIV/0!	#DIV/0!	#DIV/0!	#DIV/0!	#DIV/0!	#DIV/0!	#DIV/0!	#DIV/0!	#DIV/0!	#DIV/0!	#DIV/0!					#DIV/0!	#N/A	#N/A		#DIV/0!		2										#DIV/0!	#N/A	#N/A	#N/A	#N/A	#N/A	#N/A	#N/A	#N/A	#N/A	#N/A	#N/A
	#DIV/0!	#DIV/0!	#DIV/0!	#DIV/0!	#DIV/0!	#DIV/0!	#DIV/0!	#DIV/0!	#DIV/0!	#DIV/0!	#DIV/0!	#DIV/0!	#DIV/0!	#DIV/0!	#DIV/0!	#DIV/0!	#DIV/0!					#DIV/0!	#N/A	#N/A		#DIV/0!		2										#DIV/0!	#N/A	#N/A	#N/A	#N/A	#N/A	#N/A	#N/A	#N/A	#N/A	#N/A	#N/A
	#DIV/0!	#DIV/0!	#DIV/0!	#DIV/0!	#DIV/0!	#DIV/0!	#DIV/0!	#DIV/0!	#DIV/0!	#DIV/0!	#DIV/0!	#DIV/0!	#DIV/0!	#DIV/0!	#DIV/0!	#DIV/0!	#DIV/0!					#DIV/0!	#N/A	#N/A		#DIV/0!		2										#DIV/0!	#N/A	#N/A	#N/A	#N/A	#N/A	#N/A	#N/A	#N/A	#N/A	#N/A	#N/A
	#DIV/0!	#DIV/0!	#DIV/0!	#DIV/0!	#DIV/0!	#DIV/0!	#DIV/0!	#DIV/0!	#DIV/0!	#DIV/0!	#DIV/0!	#DIV/0!	#DIV/0!	#DIV/0!	#DIV/0!	#DIV/0!	#DIV/0!					#DIV/0!	#N/A	#N/A		#DIV/0!		2										#DIV/0!	#N/A	#N/A	#N/A	#N/A	#N/A	#N/A	#N/A	#N/A	#N/A	#N/A	#N/A
																						#DIV/0!	#N/A	#N/A		#DIV/0!		2
																						0.505	0.505	0.505727		0.000726874	0.000726874	2											0.5	1.96399	1.97735	1.99072	2.00408	2.01745	2.03081	#N/A	#N/A	#N/A	#N/A
																						0.588	0.588	0.588242		0.00024228	0.00024228	2											0.4	1.68675	1.69998	1.71321	1.72644	1.73966	1.75289	#N/A	#N/A	#N/A	#N/A
																						0.702	0.702	0.702523		0.000523137	0.000523137	2											0.3003	1.41035	1.42344	1.43653	1.44962	1.46271	1.47581	#N/A	#N/A	#N/A	#N/A
																						0.873	0.873	0.873183		0.000182763	0.000182763	2											0.2	1.13228	1.14524	1.15819	1.17114	1.1841	1.19705	#N/A	#N/A	#N/A	#N/A
																						#DIV/0!	#N/A	#N/A		#DIV/0!		2											#N/A	#N/A	#N/A	#N/A	#N/A	#N/A	#N/A	#N/A	#N/A	#N/A	#N/A
																						#DIV/0!	#N/A	#N/A		#DIV/0!		2											#N/A	#N/A	#N/A	#N/A	#N/A	#N/A	#N/A	#N/A	#N/A	#N/A	#N/A
																						#DIV/0!	#N/A	#N/A		#DIV/0!		2											#N/A	#N/A	#N/A	#N/A	#N/A	#N/A	#N/A	#N/A	#N/A	#N/A	#N/A
																						#DIV/0!	#N/A	#N/A		#DIV/0!		2											#N/A	#N/A	#N/A	#N/A	#N/A	#N/A	#N/A	#N/A	#N/A	#N/A	#N/A
																						#DIV/0!	#N/A	#N/A		#DIV/0!		2											#N/A	#N/A	#N/A	#N/A	#N/A	#N/A	#N/A	#N/A	#N/A	#N/A	#N/A
																						#DIV/0!	#N/A	#N/A		#DIV/0!		2											#N/A	#N/A	#N/A	#N/A	#N/A	#N/A	#N/A	#N/A	#N/A	#N/A	#N/A
																						#DIV/0!	#N/A	#N/A		#DIV/0!		2											#N/A	#N/A	#N/A	#N/A	#N/A	#N/A	#N/A	#N/A	#N/A	#N/A	#N/A
																						#DIV/0!	#N/A	#N/A		#DIV/0!		2											#N/A	#N/A	#N/A	#N/A	#N/A	#N/A	#N/A	#N/A	#N/A	#N/A	#N/A
																						#DIV/0!	#N/A	#N/A		#DIV/0!		2											#N/A	#N/A	#N/A	#N/A	#N/A	#N/A	#N/A	#N/A	#N/A	#N/A	#N/A
																						#DIV/0!	#N/A	#N/A		#DIV/0!		2											#N/A	#N/A	#N/A	#N/A	#N/A	#N/A	#N/A	#N/A	#N/A	#N/A	#N/A
																						#DIV/0!	#N/A	#N/A		#DIV/0!		2											#N/A	#N/A	#N/A	#N/A	#N/A	#N/A	#N/A	#N/A	#N/A	#N/A	#N/A
																						0.502	0.502	0.502332		0.000331604	0.000331604	2
																						0.583	0.583	0.5837		0.000700375	0.000700375	2												0.51	0.505	0.502	0.499	0.496	0.493	#DIV/0!	#DIV/0!	#DIV/0!	#DIV/0!
																						0.695	0.695	0.696121		0.00112095	0.00112095	2												0.593	0.588	0.583	0.579	0.575	0.571	#DIV/0!	#DIV/0!	#DIV/0!	#DIV/0!
																						0.862	0.862	0.863417		0.00141658	0.00141658	2												0.71	0.702	0.695	0.689	0.683	0.679	#DIV/0!	#DIV/0!	#DIV/0!	#DIV/0!
																						#DIV/0!	#N/A	#N/A		#DIV/0!		2												0.885	0.873	0.862	0.853	0.844	0.837	#DIV/0!	#DIV/0!	#DIV/0!	#DIV/0!
																						#DIV/0!	#N/A	#N/A		#DIV/0!		2												#DIV/0!	#DIV/0!	#DIV/0!	#DIV/0!	#DIV/0!	#DIV/0!	#DIV/0!	#DIV/0!	#DIV/0!	#DIV/0!
																						#DIV/0!	#N/A	#N/A		#DIV/0!		2												#DIV/0!	#DIV/0!	#DIV/0!	#DIV/0!	#DIV/0!	#DIV/0!	#DIV/0!	#DIV/0!	#DIV/0!	#DIV/0!
																						#DIV/0!	#N/A	#N/A		#DIV/0!		2												#DIV/0!	#DIV/0!	#DIV/0!	#DIV/0!	#DIV/0!	#DIV/0!	#DIV/0!	#DIV/0!	#DIV/0!	#DIV/0!
																						#DIV/0!	#N/A	#N/A		#DIV/0!		2												#DIV/0!	#DIV/0!	#DIV/0!	#DIV/0!	#DIV/0!	#DIV/0!	#DIV/0!	#DIV/0!	#DIV/0!	#DIV/0!
																						#DIV/0!	#N/A	#N/A		#DIV/0!		2												#DIV/0!	#DIV/0!	#DIV/0!	#DIV/0!	#DIV/0!	#DIV/0!	#DIV/0!	#DIV/0!	#DIV/0!	#DIV/0!
																						#DIV/0!	#N/A	#N/A		#DIV/0!		2												#DIV/0!	#DIV/0!	#DIV/0!	#DIV/0!	#DIV/0!	#DIV/0!	#DIV/0!	#DIV/0!	#DIV/0!	#DIV/0!
																						#DIV/0!	#N/A	#N/A		#DIV/0!		2												#DIV/0!	#DIV/0!	#DIV/0!	#DIV/0!	#DIV/0!	#DIV/0!	#DIV/0!	#DIV/0!	#DIV/0!	#DIV/0!
																						#DIV/0!	#N/A	#N/A		#DIV/0!		2												#DIV/0!	#DIV/0!	#DIV/0!	#DIV/0!	#DIV/0!	#DIV/0!	#DIV/0!	#DIV/0!	#DIV/0!	#DIV/0!
																						#DIV/0!	#N/A	#N/A		#DIV/0!		2												#DIV/0!	#DIV/0!	#DIV/0!	#DIV/0!	#DIV/0!	#DIV/0!	#DIV/0!	#DIV/0!	#DIV/0!	#DIV/0!
																						#DIV/0!	#N/A	#N/A		#DIV/0!		2												#DIV/0!	#DIV/0!	#DIV/0!	#DIV/0!	#DIV/0!	#DIV/0!	#DIV/0!	#DIV/0!	#DIV/0!	#DIV/0!
																						0.499	0.499	0.498982		-1.83802e-05	-1.83802e-05	2												#DIV/0!	#DIV/0!	#DIV/0!	#DIV/0!	#DIV/0!	#DIV/0!	#DIV/0!	#DIV/0!	#DIV/0!	#DIV/0!
																						0.579	0.579	0.579228		0.00022807	0.00022807	2
																						0.689	0.689	0.689834		0.000834398	0.000834398	2												1/s	0	1	2	3	4	5	0	0	0
																						0.853	0.853	0.853866		0.000866445	0.000866445	2											1	0.5	1.96399	1.97735	1.99072	2.00408	2.01745	2.03081	#N/A	#N/A	#N/A
																						#DIV/0!	#N/A	#N/A		#DIV/0!		2											2	0.4	1.68675	1.69998	1.71321	1.72644	1.73966	1.75289	#N/A	#N/A	#N/A
																						#DIV/0!	#N/A	#N/A		#DIV/0!		2											3	0.3003	1.41035	1.42344	1.43653	1.44962	1.46271	1.47581	#N/A	#N/A	#N/A
																						#DIV/0!	#N/A	#N/A		#DIV/0!		2											4	0.2	1.13228	1.14524	1.15819	1.17114	1.1841	1.19705	#N/A	#N/A	#N/A
																						#DIV/0!	#N/A	#N/A		#DIV/0!		2											5	#N/A	#N/A	#N/A	#N/A	#N/A	#N/A	#N/A	#N/A	#N/A	#N/A
																						#DIV/0!	#N/A	#N/A		#DIV/0!		2											6	#N/A	#N/A	#N/A	#N/A	#N/A	#N/A	#N/A	#N/A	#N/A	#N/A
																						#DIV/0!	#N/A	#N/A		#DIV/0!		2											7	#N/A	#N/A	#N/A	#N/A	#N/A	#N/A	#N/A	#N/A	#N/A	#N/A
																						#DIV/0!	#N/A	#N/A		#DIV/0!		2											8	#N/A	#N/A	#N/A	#N/A	#N/A	#N/A	#N/A	#N/A	#N/A	#N/A
																						#DIV/0!	#N/A	#N/A		#DIV/0!		2											9	#N/A	#N/A	#N/A	#N/A	#N/A	#N/A	#N/A	#N/A	#N/A	#N/A
																						#DIV/0!	#N/A	#N/A		#DIV/0!		2											10	#N/A	#N/A	#N/A	#N/A	#N/A	#N/A	#N/A	#N/A	#N/A	#N/A
																						#DIV/0!	#N/A	#N/A		#DIV/0!		2											11	#N/A	#N/A	#N/A	#N/A	#N/A	#N/A	#N/A	#N/A	#N/A	#N/A
																						#DIV/0!	#N/A	#N/A		#DIV/0!		2											12	#N/A	#N/A	#N/A	#N/A	#N/A	#N/A	#N/A	#N/A	#N/A	#N/A
																						0.496	0.496	0.495676		-0.000323979	-0.000323979	2											13	#N/A	#N/A	#N/A	#N/A	#N/A	#N/A	#N/A	#N/A	#N/A	#N/A
																						0.575	0.575	0.574824		-0.000176223	-0.000176223	2											14	#N/A	#N/A	#N/A	#N/A	#N/A	#N/A	#N/A	#N/A	#N/A	#N/A
																						0.683	0.683	0.68366		0.000660375	0.000660375	2											15	#N/A	#N/A	#N/A	#N/A	#N/A	#N/A	#N/A	#N/A	#N/A	#N/A
																						0.844	0.844	0.844525		0.000525263	0.000525263	2
																						#DIV/0!	#N/A	#N/A		#DIV/0!		2
																						#DIV/0!	#N/A	#N/A		#DIV/0!		2
																						#DIV/0!	#N/A	#N/A		#DIV/0!		2
																						#DIV/0!	#N/A	#N/A		#DIV/0!		2
																						#DIV/0!	#N/A	#N/A		#DIV/0!		2
																						#DIV/0!	#N/A	#N/A		#DIV/0!		2
																						#DIV/0!	#N/A	#N/A		#DIV/0!		2
																						#DIV/0!	#N/A	#N/A		#DIV/0!		2
																						#DIV/0!	#N/A	#N/A		#DIV/0!		2
																						#DIV/0!	#N/A	#N/A		#DIV/0!		2
																						#DIV/0!	#N/A	#N/A		#DIV/0!		2
																						0.493	0.493	0.492414		-0.00058607	-0.00058607	2
																						0.571	0.571	0.570486		-0.000514043	-0.000514043	2
																						0.679	0.679	0.677596		-0.00140411	-0.00140411	2
																						0.837	0.837	0.835386		-0.00161375	-0.00161375	2
																						#DIV/0!	#N/A	#N/A		#DIV/0!		2
																						#DIV/0!	#N/A	#N/A		#DIV/0!		2
																						#DIV/0!	#N/A	#N/A		#DIV/0!		2
																						#DIV/0!	#N/A	#N/A		#DIV/0!		2
																						#DIV/0!	#N/A	#N/A		#DIV/0!		2
																						#DIV/0!	#N/A	#N/A		#DIV/0!		2
																						#DIV/0!	#N/A	#N/A		#DIV/0!		2
																						#DIV/0!	#N/A	#N/A		#DIV/0!		2
																						#DIV/0!	#N/A	#N/A		#DIV/0!		2
																						#DIV/0!	#N/A	#N/A		#DIV/0!		2
																						#DIV/0!	#N/A	#N/A		#DIV/0!		2
																						#DIV/0!	#N/A	#N/A		#DIV/0!		2
																						#DIV/0!	#N/A	#N/A		#DIV/0!		2
																						#DIV/0!	#N/A	#N/A		#DIV/0!		2
																						#DIV/0!	#N/A	#N/A		#DIV/0!		2
																						#DIV/0!	#N/A	#N/A		#DIV/0!		2
																						#DIV/0!	#N/A	#N/A		#DIV/0!		2
																						#DIV/0!	#N/A	#N/A		#DIV/0!		2
																						#DIV/0!	#N/A	#N/A		#DIV/0!		2
																						#DIV/0!	#N/A	#N/A		#DIV/0!		2
																						#DIV/0!	#N/A	#N/A		#DIV/0!		2
																						#DIV/0!	#N/A	#N/A		#DIV/0!		2
																						#DIV/0!	#N/A	#N/A		#DIV/0!		2
																						#DIV/0!	#N/A	#N/A		#DIV/0!		2
																						#DIV/0!	#N/A	#N/A		#DIV/0!		2
																						#DIV/0!	#N/A	#N/A		#DIV/0!		2
																						#DIV/0!	#N/A	#N/A		#DIV/0!		2
																						#DIV/0!	#N/A	#N/A		#DIV/0!		2
																						#DIV/0!	#N/A	#N/A		#DIV/0!		2
																						#DIV/0!	#N/A	#N/A		#DIV/0!		2
																						#DIV/0!	#N/A	#N/A		#DIV/0!		2
																						#DIV/0!	#N/A	#N/A		#DIV/0!		2
																						#DIV/0!	#N/A	#N/A		#DIV/0!		2
																						#DIV/0!	#N/A	#N/A		#DIV/0!		2
																						#DIV/0!	#N/A	#N/A		#DIV/0!		2
																						#DIV/0!	#N/A	#N/A		#DIV/0!		2
																						#DIV/0!	#N/A	#N/A		#DIV/0!		2
																						#DIV/0!	#N/A	#N/A		#DIV/0!		2
																						#DIV/0!	#N/A	#N/A		#DIV/0!		2
																						#DIV/0!	#N/A	#N/A		#DIV/0!		2
																						#DIV/0!	#N/A	#N/A		#DIV/0!		2
																						#DIV/0!	#N/A	#N/A		#DIV/0!		2
																						#DIV/0!	#N/A	#N/A		#DIV/0!		2
																						#DIV/0!	#N/A	#N/A		#DIV/0!		2
																						#DIV/0!	#N/A	#N/A		#DIV/0!		2
																						#DIV/0!	#N/A	#N/A		#DIV/0!		2
																						#DIV/0!	#N/A	#N/A		#DIV/0!		2
																						#DIV/0!	#N/A	#N/A		#DIV/0!		2
																						#DIV/0!	#N/A	#N/A		#DIV/0!		2
																						#DIV/0!	#N/A	#N/A		#DIV/0!		2
																						#DIV/0!	#N/A	#N/A		#DIV/0!		2
																						#DIV/0!	#N/A	#N/A		#DIV/0!		2
																						#DIV/0!	#N/A	#N/A		#DIV/0!		2
																						#DIV/0!	#N/A	#N/A		#DIV/0!		2
																						#DIV/0!	#N/A	#N/A		#DIV/0!		2
																						#DIV/0!	#N/A	#N/A		#DIV/0!		2
																						#DIV/0!	#N/A	#N/A		#DIV/0!		2
																						#DIV/0!	#N/A	#N/A		#DIV/0!		2
																						#DIV/0!	#N/A	#N/A		#DIV/0!		2
																						#DIV/0!	#N/A	#N/A		#DIV/0!		2
																						#DIV/0!	#N/A	#N/A		#DIV/0!		2
																						#DIV/0!	#N/A	#N/A		#DIV/0!		2
																						#DIV/0!	#N/A	#N/A		#DIV/0!		2
																						#DIV/0!	#N/A	#N/A		#DIV/0!		2
																						#DIV/0!	#N/A	#N/A		#DIV/0!		2
																						#DIV/0!	#N/A	#N/A		#DIV/0!		2
																						#DIV/0!	#N/A	#N/A		#DIV/0!		2
																						#DIV/0!	#N/A	#N/A		#DIV/0!		2
																						#DIV/0!	#N/A	#N/A		#DIV/0!		2
																						#DIV/0!	#N/A	#N/A		#DIV/0!		2
																						#DIV/0!	#N/A	#N/A		#DIV/0!		2
																						#DIV/0!	#N/A	#N/A		#DIV/0!		2
																						#DIV/0!	#N/A	#N/A		#DIV/0!		2
																						#DIV/0!	#N/A	#N/A		#DIV/0!		2
																						#DIV/0!	#N/A	#N/A		#DIV/0!		2
																						#DIV/0!	#N/A	#N/A		#DIV/0!		2
																						#DIV/0!	#N/A	#N/A		#DIV/0!		2
																						#DIV/0!	#N/A	#N/A		#DIV/0!		2
																						#DIV/0!	#N/A	#N/A		#DIV/0!		2
																						#DIV/0!	#N/A	#N/A		#DIV/0!		2
																						#DIV/0!	#N/A	#N/A		#DIV/0!		2
																						#DIV/0!	#N/A	#N/A		#DIV/0!		2
																						#DIV/0!	#N/A	#N/A		#DIV/0!		2
																						#DIV/0!	#N/A	#N/A		#DIV/0!		2
																						#DIV/0!	#N/A	#N/A		#DIV/0!		2
																						#DIV/0!	#N/A	#N/A		#DIV/0!		2
																						#DIV/0!	#N/A	#N/A		#DIV/0!		2
																						#DIV/0!	#N/A	#N/A		#DIV/0!		2
																						#DIV/0!	#N/A	#N/A		#DIV/0!		2
																						#DIV/0!	#N/A	#N/A		#DIV/0!		2
																						#DIV/0!	#N/A	#N/A		#DIV/0!		2
																						#DIV/0!	#N/A	#N/A		#DIV/0!		2
																						#DIV/0!	#N/A	#N/A		#DIV/0!		2
																						#DIV/0!	#N/A	#N/A		#DIV/0!		2
																						#DIV/0!	#N/A	#N/A		#DIV/0!		2
																						#DIV/0!	#N/A	#N/A		#DIV/0!		2
																						#DIV/0!	#N/A	#N/A		#DIV/0!		2
																						#DIV/0!	#N/A	#N/A		#DIV/0!		2
																						#DIV/0!	#N/A	#N/A		#DIV/0!		2
																						#DIV/0!	#N/A	#N/A		#DIV/0!		2
																						#DIV/0!	#N/A	#N/A		#DIV/0!		2
																						#DIV/0!	#N/A	#N/A		#DIV/0!		2
																						#DIV/0!	#N/A	#N/A		#DIV/0!		2
																						#DIV/0!	#N/A	#N/A		#DIV/0!		2
																						#DIV/0!	#N/A	#N/A		#DIV/0!		2
																						#DIV/0!	#N/A	#N/A		#DIV/0!		2
																						#DIV/0!	#N/A	#N/A		#DIV/0!		2
																						#DIV/0!	#N/A	#N/A		#DIV/0!		2
																						#DIV/0!	#N/A	#N/A		#DIV/0!		2
																						#DIV/0!	#N/A	#N/A		#DIV/0!		2
																						#DIV/0!	#N/A	#N/A		#DIV/0!		2
																						#DIV/0!	#N/A	#N/A		#DIV/0!		2
																						#DIV/0!	#N/A	#N/A		#DIV/0!		2
																						#DIV/0!	#N/A	#N/A		#DIV/0!		2
																						#DIV/0!	#N/A	#N/A		#DIV/0!		2
																						#DIV/0!	#N/A	#N/A		#DIV/0!		2
																						#DIV/0!	#N/A	#N/A		#DIV/0!		2
																						#DIV/0!	#N/A	#N/A		#DIV/0!		2
																						#DIV/0!	#N/A	#N/A		#DIV/0!		2
																						#DIV/0!	#N/A	#N/A		#DIV/0!		2
																						#DIV/0!	#N/A	#N/A		#DIV/0!		2
																						#DIV/0!	#N/A	#N/A		#DIV/0!		2
																						#DIV/0!	#N/A	#N/A		#DIV/0!		2
																						#DIV/0!	#N/A	#N/A		#DIV/0!		2
																						#DIV/0!	#N/A	#N/A		#DIV/0!		2
																						#DIV/0!	#N/A	#N/A		#DIV/0!		2
																						#DIV/0!	#N/A	#N/A		#DIV/0!		2
																						#DIV/0!	#N/A	#N/A		#DIV/0!		2
																						#DIV/0!	#N/A	#N/A		#DIV/0!		2
																						#DIV/0!	#N/A	#N/A		#DIV/0!		2
																						#DIV/0!	#N/A	#N/A		#DIV/0!		2
																						#DIV/0!	#N/A	#N/A		#DIV/0!		2
																						#DIV/0!	#N/A	#N/A		#DIV/0!		2
																						#DIV/0!	#N/A	#N/A		#DIV/0!		2
																						#DIV/0!	#N/A	#N/A		#DIV/0!		2
																						#DIV/0!	#N/A	#N/A		#DIV/0!		2
																						#DIV/0!	#N/A	#N/A		#DIV/0!		2
																						#DIV/0!	#N/A	#N/A		#DIV/0!		2
																						#DIV/0!	#N/A	#N/A		#DIV/0!		2
																						#DIV/0!	#N/A	#N/A		#DIV/0!		2
																						#DIV/0!	#N/A	#N/A		#DIV/0!		2
																						#DIV/0!	#N/A	#N/A		#DIV/0!		2
																						#DIV/0!	#N/A	#N/A		#DIV/0!		2
																						#DIV/0!	#N/A	#N/A		#DIV/0!		2
																						#DIV/0!	#N/A	#N/A		#DIV/0!		2
																						#DIV/0!	#N/A	#N/A		#DIV/0!		2
																						#DIV/0!	#N/A	#N/A		#DIV/0!		2
																						#DIV/0!	#N/A	#N/A		#DIV/0!		2
																						#DIV/0!	#N/A	#N/A		#DIV/0!		2
																						#DIV/0!	#N/A	#N/A		#DIV/0!		2
																						#DIV/0!	#N/A	#N/A		#DIV/0!		2
																						#DIV/0!	#N/A	#N/A		#DIV/0!		2
																						#DIV/0!	#N/A	#N/A		#DIV/0!		2
																						#DIV/0!	#N/A	#N/A		#DIV/0!		2
																						#DIV/0!	#N/A	#N/A		#DIV/0!		2
																						#DIV/0!	#N/A	#N/A		#DIV/0!		2
																						#DIV/0!	#N/A	#N/A		#DIV/0!		2
																						#DIV/0!	#N/A	#N/A		#DIV/0!		2
																						#DIV/0!	#N/A	#N/A		#DIV/0!		2
																						#DIV/0!	#N/A	#N/A		#DIV/0!		2
																						#DIV/0!	#N/A	#N/A		#DIV/0!		2
[truncated: 54 more columns]

## Sheet: Partial Uncompetitive
																	((V_max+(V2*[I])/K_i )*[S])/(K_s+((1+[I])/K_i )*[S] )						Calculated values
		No Inhibitor	[I]1	[I]2	[I]3	[I]4	[I]5	[I]6	[I]7	[I]8	[I]9	[I]10	[I]11	[I]12	[I]13	[I]14	[I]15			4.63493	#DIV/0!	1	No Inhibitor	[I]1	[I]2	[I]3	[I]4	[I]5	[I]6	[I]7	[I]8	[I]9	[I]10	[I]11	[I]12	[I]13	[I]14	[I]15
		0	1	2	3	4	5	0	0	0	0	0	0	0	0	0	0	Km	Vmax	Ki	V2	0	0	1	2	3	4	5	0	0	0	0	0	0	0	0	0	0
[S]1	2	0.51	0.505	0.502	0.499	0.496	0.493	0	0	0	0	0	0	0	0	0	0	9.26985	2.36425	1.64441	0.670651		0.45093	0.473766	0.492302	0.507648	0.520563	0.531581	#DIV/0!	#DIV/0!	#DIV/0!	#DIV/0!	#DIV/0!	#DIV/0!	#DIV/0!	#DIV/0!	#DIV/0!	#DIV/0!		0.45093	0.473766	0.492302	0.507648	0.520563	0.531581	0	0	0	0
[S]2	2.5	0.593	0.588	0.583	0.579	0.575	0.571	0	0	0	0	0	0	0	0	0	0						0.547779	0.562953	0.574792	0.584285	0.592068	0.598564	#DIV/0!	#DIV/0!	#DIV/0!	#DIV/0!	#DIV/0!	#DIV/0!	#DIV/0!	#DIV/0!	#DIV/0!	#DIV/0!		0.547779	0.562953	0.574792	0.584285	0.592068	0.598564	0	0	0	0
[S]3	3.33	0.71	0.702	0.695	0.689	0.683	0.679	0	0	0	0	0	0	0	0	0	0						0.697036	0.693024	0.690072	0.687808	0.686016	0.684564	#DIV/0!	#DIV/0!	#DIV/0!	#DIV/0!	#DIV/0!	#DIV/0!	#DIV/0!	#DIV/0!	#DIV/0!	#DIV/0!		0.697036	0.693024	0.690072	0.687808	0.686016	0.684564	0	0	0	0
[S]4	5	0.885	0.873	0.862	0.853	0.844	0.837	0	0	0	0	0	0	0	0	0	0						0.96026	0.902896	0.8645	0.836999	0.816331	0.800231	#DIV/0!	#DIV/0!	#DIV/0!	#DIV/0!	#DIV/0!	#DIV/0!	#DIV/0!	#DIV/0!	#DIV/0!	#DIV/0!		0.96026	0.902896	0.8645	0.836999	0.816331	0.800231	0	0	0	0
[S]5	0	0	0	0	0	0	0	0	0	0	0	0	0	0	0	0	0						#DIV/0!	#DIV/0!	#DIV/0!	#DIV/0!	#DIV/0!	#DIV/0!	#DIV/0!	#DIV/0!	#DIV/0!	#DIV/0!	#DIV/0!	#DIV/0!	#DIV/0!	#DIV/0!	#DIV/0!	#DIV/0!		0	0	0	0	0	0	0	0	0	0
[S]6	0	0	0	0	0	0	0	0	0	0	0	0	0	0	0	0	0						#DIV/0!	#DIV/0!	#DIV/0!	#DIV/0!	#DIV/0!	#DIV/0!	#DIV/0!	#DIV/0!	#DIV/0!	#DIV/0!	#DIV/0!	#DIV/0!	#DIV/0!	#DIV/0!	#DIV/0!	#DIV/0!		0	0	0	0	0	0	0	0	0	0
[S]7	0	0	0	0	0	0	0	0	0	0	0	0	0	0	0	0	0						#DIV/0!	#DIV/0!	#DIV/0!	#DIV/0!	#DIV/0!	#DIV/0!	#DIV/0!	#DIV/0!	#DIV/0!	#DIV/0!	#DIV/0!	#DIV/0!	#DIV/0!	#DIV/0!	#DIV/0!	#DIV/0!		0	0	0	0	0	0	0	0	0	0
[S]8	0	0	0	0	0	0	0	0	0	0	0	0	0	0	0	0	0			Sum R2	0.0197961		#DIV/0!	#DIV/0!	#DIV/0!	#DIV/0!	#DIV/0!	#DIV/0!	#DIV/0!	#DIV/0!	#DIV/0!	#DIV/0!	#DIV/0!	#DIV/0!	#DIV/0!	#DIV/0!	#DIV/0!	#DIV/0!		0	0	0	0	0	0	0	0	0	0
[S]9	0	0	0	0	0	0	0	0	0	0	0	0	0	0	0	0	0			Sum residuals %	0.844957		#DIV/0!	#DIV/0!	#DIV/0!	#DIV/0!	#DIV/0!	#DIV/0!	#DIV/0!	#DIV/0!	#DIV/0!	#DIV/0!	#DIV/0!	#DIV/0!	#DIV/0!	#DIV/0!	#DIV/0!	#DIV/0!		0	0	0	0	0	0	0	0	0	0
[S]10	0	0	0	0	0	0	0	0	0	0	0	0	0	0	0	0	0						#DIV/0!	#DIV/0!	#DIV/0!	#DIV/0!	#DIV/0!	#DIV/0!	#DIV/0!	#DIV/0!	#DIV/0!	#DIV/0!	#DIV/0!	#DIV/0!	#DIV/0!	#DIV/0!	#DIV/0!	#DIV/0!		0	0	0	0	0	0	0	0	0	0
[S]11	0	0	0	0	0	0	0	0	0	0	0	0	0	0	0	0	0						#DIV/0!	#DIV/0!	#DIV/0!	#DIV/0!	#DIV/0!	#DIV/0!	#DIV/0!	#DIV/0!	#DIV/0!	#DIV/0!	#DIV/0!	#DIV/0!	#DIV/0!	#DIV/0!	#DIV/0!	#DIV/0!		0	0	0	0	0	0	0	0	0	0
[S]12	0	0	0	0	0	0	0	0	0	0	0	0	0	0	0	0	0						#DIV/0!	#DIV/0!	#DIV/0!	#DIV/0!	#DIV/0!	#DIV/0!	#DIV/0!	#DIV/0!	#DIV/0!	#DIV/0!	#DIV/0!	#DIV/0!	#DIV/0!	#DIV/0!	#DIV/0!	#DIV/0!		0	0	0	0	0	0	0	0	0	0
[S]13	0	0	0	0	0	0	0	0	0	0	0	0	0	0	0	0	0						#DIV/0!	#DIV/0!	#DIV/0!	#DIV/0!	#DIV/0!	#DIV/0!	#DIV/0!	#DIV/0!	#DIV/0!	#DIV/0!	#DIV/0!	#DIV/0!	#DIV/0!	#DIV/0!	#DIV/0!	#DIV/0!		0	0	0	0	0	0	0	0	0	0
[S]14	0	0	0	0	0	0	0	0	0	0	0	0	0	0	0	0	0						#DIV/0!	#DIV/0!	#DIV/0!	#DIV/0!	#DIV/0!	#DIV/0!	#DIV/0!	#DIV/0!	#DIV/0!	#DIV/0!	#DIV/0!	#DIV/0!	#DIV/0!	#DIV/0!	#DIV/0!	#DIV/0!		0	0	0	0	0	0	0	0	0	0
[S]15	0	0	0	0	0	0	0	0	0	0	0	0	0	0	0	0	0						#DIV/0!	#DIV/0!	#DIV/0!	#DIV/0!	#DIV/0!	#DIV/0!	#DIV/0!	#DIV/0!	#DIV/0!	#DIV/0!	#DIV/0!	#DIV/0!	#DIV/0!	#DIV/0!	#DIV/0!	#DIV/0!		0	0	0	0	0	0	0	0	0	0
	1	1	1	1	1	1	1	#DIV/0!	#DIV/0!	#DIV/0!	#DIV/0!	#DIV/0!	#DIV/0!	#DIV/0!	#DIV/0!	#DIV/0!	#DIV/0!																					2	2	0.45093	0.473766	0.492302	0.507648	0.520563	0.531581	#N/A	#N/A	#N/A	#N/A
	1	1	1	1	1	1	1	#DIV/0!	#DIV/0!	#DIV/0!	#DIV/0!	#DIV/0!	#DIV/0!	#DIV/0!	#DIV/0!	#DIV/0!	#DIV/0!					0.51	0.51	0.45093		-0.0590699	-0.0590699	3										2.5	2.5	0.547779	0.562953	0.574792	0.584285	0.592068	0.598564	#N/A	#N/A	#N/A	#N/A
	1	1	1	1	1	1	1	#DIV/0!	#DIV/0!	#DIV/0!	#DIV/0!	#DIV/0!	#DIV/0!	#DIV/0!	#DIV/0!	#DIV/0!	#DIV/0!					0.593	0.593	0.547779		-0.0452211	-0.0452211	3										3.33	3.33	0.697036	0.693024	0.690072	0.687808	0.686016	0.684564	#N/A	#N/A	#N/A	#N/A
	1	1	1	1	1	1	1	#DIV/0!	#DIV/0!	#DIV/0!	#DIV/0!	#DIV/0!	#DIV/0!	#DIV/0!	#DIV/0!	#DIV/0!	#DIV/0!					0.71	0.71	0.697036		-0.0129645	-0.0129645	3										5	5	0.96026	0.902896	0.8645	0.836999	0.816331	0.800231	#N/A	#N/A	#N/A	#N/A
	#DIV/0!	#DIV/0!	#DIV/0!	#DIV/0!	#DIV/0!	#DIV/0!	#DIV/0!	#DIV/0!	#DIV/0!	#DIV/0!	#DIV/0!	#DIV/0!	#DIV/0!	#DIV/0!	#DIV/0!	#DIV/0!	#DIV/0!					0.885	0.885	0.96026		0.0752595	0.0752595	3										#DIV/0!	#N/A	#N/A	#N/A	#N/A	#N/A	#N/A	#N/A	#N/A	#N/A	#N/A	#N/A
	#DIV/0!	#DIV/0!	#DIV/0!	#DIV/0!	#DIV/0!	#DIV/0!	#DIV/0!	#DIV/0!	#DIV/0!	#DIV/0!	#DIV/0!	#DIV/0!	#DIV/0!	#DIV/0!	#DIV/0!	#DIV/0!	#DIV/0!					#DIV/0!	#N/A	#N/A		#DIV/0!		3										#DIV/0!	#N/A	#N/A	#N/A	#N/A	#N/A	#N/A	#N/A	#N/A	#N/A	#N/A	#N/A
	#DIV/0!	#DIV/0!	#DIV/0!	#DIV/0!	#DIV/0!	#DIV/0!	#DIV/0!	#DIV/0!	#DIV/0!	#DIV/0!	#DIV/0!	#DIV/0!	#DIV/0!	#DIV/0!	#DIV/0!	#DIV/0!	#DIV/0!					#DIV/0!	#N/A	#N/A		#DIV/0!		3										#DIV/0!	#N/A	#N/A	#N/A	#N/A	#N/A	#N/A	#N/A	#N/A	#N/A	#N/A	#N/A
	#DIV/0!	#DIV/0!	#DIV/0!	#DIV/0!	#DIV/0!	#DIV/0!	#DIV/0!	#DIV/0!	#DIV/0!	#DIV/0!	#DIV/0!	#DIV/0!	#DIV/0!	#DIV/0!	#DIV/0!	#DIV/0!	#DIV/0!					#DIV/0!	#N/A	#N/A		#DIV/0!		3										#DIV/0!	#N/A	#N/A	#N/A	#N/A	#N/A	#N/A	#N/A	#N/A	#N/A	#N/A	#N/A
	#DIV/0!	#DIV/0!	#DIV/0!	#DIV/0!	#DIV/0!	#DIV/0!	#DIV/0!	#DIV/0!	#DIV/0!	#DIV/0!	#DIV/0!	#DIV/0!	#DIV/0!	#DIV/0!	#DIV/0!	#DIV/0!	#DIV/0!					#DIV/0!	#N/A	#N/A		#DIV/0!		3										#DIV/0!	#N/A	#N/A	#N/A	#N/A	#N/A	#N/A	#N/A	#N/A	#N/A	#N/A	#N/A
	#DIV/0!	#DIV/0!	#DIV/0!	#DIV/0!	#DIV/0!	#DIV/0!	#DIV/0!	#DIV/0!	#DIV/0!	#DIV/0!	#DIV/0!	#DIV/0!	#DIV/0!	#DIV/0!	#DIV/0!	#DIV/0!	#DIV/0!					#DIV/0!	#N/A	#N/A		#DIV/0!		3										#DIV/0!	#N/A	#N/A	#N/A	#N/A	#N/A	#N/A	#N/A	#N/A	#N/A	#N/A	#N/A
	#DIV/0!	#DIV/0!	#DIV/0!	#DIV/0!	#DIV/0!	#DIV/0!	#DIV/0!	#DIV/0!	#DIV/0!	#DIV/0!	#DIV/0!	#DIV/0!	#DIV/0!	#DIV/0!	#DIV/0!	#DIV/0!	#DIV/0!					#DIV/0!	#N/A	#N/A		#DIV/0!		3										#DIV/0!	#N/A	#N/A	#N/A	#N/A	#N/A	#N/A	#N/A	#N/A	#N/A	#N/A	#N/A
	#DIV/0!	#DIV/0!	#DIV/0!	#DIV/0!	#DIV/0!	#DIV/0!	#DIV/0!	#DIV/0!	#DIV/0!	#DIV/0!	#DIV/0!	#DIV/0!	#DIV/0!	#DIV/0!	#DIV/0!	#DIV/0!	#DIV/0!					#DIV/0!	#N/A	#N/A		#DIV/0!		3										#DIV/0!	#N/A	#N/A	#N/A	#N/A	#N/A	#N/A	#N/A	#N/A	#N/A	#N/A	#N/A
	#DIV/0!	#DIV/0!	#DIV/0!	#DIV/0!	#DIV/0!	#DIV/0!	#DIV/0!	#DIV/0!	#DIV/0!	#DIV/0!	#DIV/0!	#DIV/0!	#DIV/0!	#DIV/0!	#DIV/0!	#DIV/0!	#DIV/0!					#DIV/0!	#N/A	#N/A		#DIV/0!		3										#DIV/0!	#N/A	#N/A	#N/A	#N/A	#N/A	#N/A	#N/A	#N/A	#N/A	#N/A	#N/A
	#DIV/0!	#DIV/0!	#DIV/0!	#DIV/0!	#DIV/0!	#DIV/0!	#DIV/0!	#DIV/0!	#DIV/0!	#DIV/0!	#DIV/0!	#DIV/0!	#DIV/0!	#DIV/0!	#DIV/0!	#DIV/0!	#DIV/0!					#DIV/0!	#N/A	#N/A		#DIV/0!		3										#DIV/0!	#N/A	#N/A	#N/A	#N/A	#N/A	#N/A	#N/A	#N/A	#N/A	#N/A	#N/A
	#DIV/0!	#DIV/0!	#DIV/0!	#DIV/0!	#DIV/0!	#DIV/0!	#DIV/0!	#DIV/0!	#DIV/0!	#DIV/0!	#DIV/0!	#DIV/0!	#DIV/0!	#DIV/0!	#DIV/0!	#DIV/0!	#DIV/0!					#DIV/0!	#N/A	#N/A		#DIV/0!		3										#DIV/0!	#N/A	#N/A	#N/A	#N/A	#N/A	#N/A	#N/A	#N/A	#N/A	#N/A	#N/A
																						#DIV/0!	#N/A	#N/A		#DIV/0!		3
																						0.505	0.505	0.473766		-0.0312339	-0.0312339	3											0.5	2.21764	2.11075	2.03127	1.96987	1.921	1.88118	#N/A	#N/A	#N/A	#N/A
																						0.588	0.588	0.562953		-0.0250468	-0.0250468	3											0.4	1.82555	1.77635	1.73976	1.71149	1.689	1.67067	#N/A	#N/A	#N/A	#N/A
																						0.702	0.702	0.693024		-0.00897573	-0.00897573	3											0.3003	1.43465	1.44295	1.44912	1.45389	1.45769	1.46078	#N/A	#N/A	#N/A	#N/A
																						0.873	0.873	0.902896		0.0298963	0.0298963	3											0.2	1.04139	1.10755	1.15674	1.19474	1.22499	1.24964	#N/A	#N/A	#N/A	#N/A
																						#DIV/0!	#N/A	#N/A		#DIV/0!		3											#N/A	#N/A	#N/A	#N/A	#N/A	#N/A	#N/A	#N/A	#N/A	#N/A	#N/A
																						#DIV/0!	#N/A	#N/A		#DIV/0!		3											#N/A	#N/A	#N/A	#N/A	#N/A	#N/A	#N/A	#N/A	#N/A	#N/A	#N/A
																						#DIV/0!	#N/A	#N/A		#DIV/0!		3											#N/A	#N/A	#N/A	#N/A	#N/A	#N/A	#N/A	#N/A	#N/A	#N/A	#N/A
																						#DIV/0!	#N/A	#N/A		#DIV/0!		3											#N/A	#N/A	#N/A	#N/A	#N/A	#N/A	#N/A	#N/A	#N/A	#N/A	#N/A
																						#DIV/0!	#N/A	#N/A		#DIV/0!		3											#N/A	#N/A	#N/A	#N/A	#N/A	#N/A	#N/A	#N/A	#N/A	#N/A	#N/A
																						#DIV/0!	#N/A	#N/A		#DIV/0!		3											#N/A	#N/A	#N/A	#N/A	#N/A	#N/A	#N/A	#N/A	#N/A	#N/A	#N/A
																						#DIV/0!	#N/A	#N/A		#DIV/0!		3											#N/A	#N/A	#N/A	#N/A	#N/A	#N/A	#N/A	#N/A	#N/A	#N/A	#N/A
																						#DIV/0!	#N/A	#N/A		#DIV/0!		3											#N/A	#N/A	#N/A	#N/A	#N/A	#N/A	#N/A	#N/A	#N/A	#N/A	#N/A
																						#DIV/0!	#N/A	#N/A		#DIV/0!		3											#N/A	#N/A	#N/A	#N/A	#N/A	#N/A	#N/A	#N/A	#N/A	#N/A	#N/A
																						#DIV/0!	#N/A	#N/A		#DIV/0!		3											#N/A	#N/A	#N/A	#N/A	#N/A	#N/A	#N/A	#N/A	#N/A	#N/A	#N/A
																						#DIV/0!	#N/A	#N/A		#DIV/0!		3											#N/A	#N/A	#N/A	#N/A	#N/A	#N/A	#N/A	#N/A	#N/A	#N/A	#N/A
																						0.502	0.502	0.492302		-0.00969781	-0.00969781	3
																						0.583	0.583	0.574792		-0.00820841	-0.00820841	3												0.51	0.505	0.502	0.499	0.496	0.493	#DIV/0!	#DIV/0!	#DIV/0!	#DIV/0!
																						0.695	0.695	0.690072		-0.00492829	-0.00492829	3												0.593	0.588	0.583	0.579	0.575	0.571	#DIV/0!	#DIV/0!	#DIV/0!	#DIV/0!
																						0.862	0.862	0.8645		0.00250026	0.00250026	3												0.71	0.702	0.695	0.689	0.683	0.679	#DIV/0!	#DIV/0!	#DIV/0!	#DIV/0!
																						#DIV/0!	#N/A	#N/A		#DIV/0!		3												0.885	0.873	0.862	0.853	0.844	0.837	#DIV/0!	#DIV/0!	#DIV/0!	#DIV/0!
																						#DIV/0!	#N/A	#N/A		#DIV/0!		3												#DIV/0!	#DIV/0!	#DIV/0!	#DIV/0!	#DIV/0!	#DIV/0!	#DIV/0!	#DIV/0!	#DIV/0!	#DIV/0!
																						#DIV/0!	#N/A	#N/A		#DIV/0!		3												#DIV/0!	#DIV/0!	#DIV/0!	#DIV/0!	#DIV/0!	#DIV/0!	#DIV/0!	#DIV/0!	#DIV/0!	#DIV/0!
																						#DIV/0!	#N/A	#N/A		#DIV/0!		3												#DIV/0!	#DIV/0!	#DIV/0!	#DIV/0!	#DIV/0!	#DIV/0!	#DIV/0!	#DIV/0!	#DIV/0!	#DIV/0!
																						#DIV/0!	#N/A	#N/A		#DIV/0!		3												#DIV/0!	#DIV/0!	#DIV/0!	#DIV/0!	#DIV/0!	#DIV/0!	#DIV/0!	#DIV/0!	#DIV/0!	#DIV/0!
																						#DIV/0!	#N/A	#N/A		#DIV/0!		3												#DIV/0!	#DIV/0!	#DIV/0!	#DIV/0!	#DIV/0!	#DIV/0!	#DIV/0!	#DIV/0!	#DIV/0!	#DIV/0!
																						#DIV/0!	#N/A	#N/A		#DIV/0!		3												#DIV/0!	#DIV/0!	#DIV/0!	#DIV/0!	#DIV/0!	#DIV/0!	#DIV/0!	#DIV/0!	#DIV/0!	#DIV/0!
																						#DIV/0!	#N/A	#N/A		#DIV/0!		3												#DIV/0!	#DIV/0!	#DIV/0!	#DIV/0!	#DIV/0!	#DIV/0!	#DIV/0!	#DIV/0!	#DIV/0!	#DIV/0!
																						#DIV/0!	#N/A	#N/A		#DIV/0!		3												#DIV/0!	#DIV/0!	#DIV/0!	#DIV/0!	#DIV/0!	#DIV/0!	#DIV/0!	#DIV/0!	#DIV/0!	#DIV/0!
																						#DIV/0!	#N/A	#N/A		#DIV/0!		3												#DIV/0!	#DIV/0!	#DIV/0!	#DIV/0!	#DIV/0!	#DIV/0!	#DIV/0!	#DIV/0!	#DIV/0!	#DIV/0!
																						#DIV/0!	#N/A	#N/A		#DIV/0!		3												#DIV/0!	#DIV/0!	#DIV/0!	#DIV/0!	#DIV/0!	#DIV/0!	#DIV/0!	#DIV/0!	#DIV/0!	#DIV/0!
																						0.499	0.499	0.507648		0.00864838	0.00864838	3												#DIV/0!	#DIV/0!	#DIV/0!	#DIV/0!	#DIV/0!	#DIV/0!	#DIV/0!	#DIV/0!	#DIV/0!	#DIV/0!
																						0.579	0.579	0.584285		0.0052851	0.0052851	3
																						0.689	0.689	0.687808		-0.0011924	-0.0011924	3												1/s	0	1	2	3	4	5	0	0	0
																						0.853	0.853	0.836999		-0.0160012	-0.0160012	3											1	0.5	2.21764	2.11075	2.03127	1.96987	1.921	1.88118	#N/A	#N/A	#N/A
																						#DIV/0!	#N/A	#N/A		#DIV/0!		3											2	0.4	1.82555	1.77635	1.73976	1.71149	1.689	1.67067	#N/A	#N/A	#N/A
																						#DIV/0!	#N/A	#N/A		#DIV/0!		3											3	0.3003	1.43465	1.44295	1.44912	1.45389	1.45769	1.46078	#N/A	#N/A	#N/A
																						#DIV/0!	#N/A	#N/A		#DIV/0!		3											4	0.2	1.04139	1.10755	1.15674	1.19474	1.22499	1.24964	#N/A	#N/A	#N/A
																						#DIV/0!	#N/A	#N/A		#DIV/0!		3											5	#N/A	#N/A	#N/A	#N/A	#N/A	#N/A	#N/A	#N/A	#N/A	#N/A
																						#DIV/0!	#N/A	#N/A		#DIV/0!		3											6	#N/A	#N/A	#N/A	#N/A	#N/A	#N/A	#N/A	#N/A	#N/A	#N/A
																						#DIV/0!	#N/A	#N/A		#DIV/0!		3											7	#N/A	#N/A	#N/A	#N/A	#N/A	#N/A	#N/A	#N/A	#N/A	#N/A
																						#DIV/0!	#N/A	#N/A		#DIV/0!		3											8	#N/A	#N/A	#N/A	#N/A	#N/A	#N/A	#N/A	#N/A	#N/A	#N/A
																						#DIV/0!	#N/A	#N/A		#DIV/0!		3											9	#N/A	#N/A	#N/A	#N/A	#N/A	#N/A	#N/A	#N/A	#N/A	#N/A
																						#DIV/0!	#N/A	#N/A		#DIV/0!		3											10	#N/A	#N/A	#N/A	#N/A	#N/A	#N/A	#N/A	#N/A	#N/A	#N/A
																						#DIV/0!	#N/A	#N/A		#DIV/0!		3											11	#N/A	#N/A	#N/A	#N/A	#N/A	#N/A	#N/A	#N/A	#N/A	#N/A
																						#DIV/0!	#N/A	#N/A		#DIV/0!		3											12	#N/A	#N/A	#N/A	#N/A	#N/A	#N/A	#N/A	#N/A	#N/A	#N/A
																						0.496	0.496	0.520563		0.0245629	0.0245629	3											13	#N/A	#N/A	#N/A	#N/A	#N/A	#N/A	#N/A	#N/A	#N/A	#N/A
																						0.575	0.575	0.592068		0.0170677	0.0170677	3											14	#N/A	#N/A	#N/A	#N/A	#N/A	#N/A	#N/A	#N/A	#N/A	#N/A
																						0.683	0.683	0.686016		0.00301627	0.00301627	3											15	#N/A	#N/A	#N/A	#N/A	#N/A	#N/A	#N/A	#N/A	#N/A	#N/A
																						0.844	0.844	0.816331		-0.027669	-0.027669	3
																						#DIV/0!	#N/A	#N/A		#DIV/0!		3
																						#DIV/0!	#N/A	#N/A		#DIV/0!		3
																						#DIV/0!	#N/A	#N/A		#DIV/0!		3
																						#DIV/0!	#N/A	#N/A		#DIV/0!		3
																						#DIV/0!	#N/A	#N/A		#DIV/0!		3
																						#DIV/0!	#N/A	#N/A		#DIV/0!		3
																						#DIV/0!	#N/A	#N/A		#DIV/0!		3
																						#DIV/0!	#N/A	#N/A		#DIV/0!		3
																						#DIV/0!	#N/A	#N/A		#DIV/0!		3
																						#DIV/0!	#N/A	#N/A		#DIV/0!		3
																						#DIV/0!	#N/A	#N/A		#DIV/0!		3
																						0.493	0.493	0.531581		0.0385812	0.0385812	3
																						0.571	0.571	0.598564		0.0275636	0.0275636	3
																						0.679	0.679	0.684564		0.00556365	0.00556365	3
																						0.837	0.837	0.800231		-0.0367685	-0.0367685	3
																						#DIV/0!	#N/A	#N/A		#DIV/0!		3
																						#DIV/0!	#N/A	#N/A		#DIV/0!		3
																						#DIV/0!	#N/A	#N/A		#DIV/0!		3
																						#DIV/0!	#N/A	#N/A		#DIV/0!		3
																						#DIV/0!	#N/A	#N/A		#DIV/0!		3
																						#DIV/0!	#N/A	#N/A		#DIV/0!		3
																						#DIV/0!	#N/A	#N/A		#DIV/0!		3
																						#DIV/0!	#N/A	#N/A		#DIV/0!		3
																						#DIV/0!	#N/A	#N/A		#DIV/0!		3
																						#DIV/0!	#N/A	#N/A		#DIV/0!		3
																						#DIV/0!	#N/A	#N/A		#DIV/0!		3
																						#DIV/0!	#N/A	#N/A		#DIV/0!		3
																						#DIV/0!	#N/A	#N/A		#DIV/0!		3
																						#DIV/0!	#N/A	#N/A		#DIV/0!		3
																						#DIV/0!	#N/A	#N/A		#DIV/0!		3
																						#DIV/0!	#N/A	#N/A		#DIV/0!		3
																						#DIV/0!	#N/A	#N/A		#DIV/0!		3
																						#DIV/0!	#N/A	#N/A		#DIV/0!		3
																						#DIV/0!	#N/A	#N/A		#DIV/0!		3
																						#DIV/0!	#N/A	#N/A		#DIV/0!		3
																						#DIV/0!	#N/A	#N/A		#DIV/0!		3
																						#DIV/0!	#N/A	#N/A		#DIV/0!		3
																						#DIV/0!	#N/A	#N/A		#DIV/0!		3
																						#DIV/0!	#N/A	#N/A		#DIV/0!		3
																						#DIV/0!	#N/A	#N/A		#DIV/0!		3
																						#DIV/0!	#N/A	#N/A		#DIV/0!		3
																						#DIV/0!	#N/A	#N/A		#DIV/0!		3
																						#DIV/0!	#N/A	#N/A		#DIV/0!		3
																						#DIV/0!	#N/A	#N/A		#DIV/0!		3
																						#DIV/0!	#N/A	#N/A		#DIV/0!		3
																						#DIV/0!	#N/A	#N/A		#DIV/0!		3
																						#DIV/0!	#N/A	#N/A		#DIV/0!		3
																						#DIV/0!	#N/A	#N/A		#DIV/0!		3
																						#DIV/0!	#N/A	#N/A		#DIV/0!		3
																						#DIV/0!	#N/A	#N/A		#DIV/0!		3
																						#DIV/0!	#N/A	#N/A		#DIV/0!		3
																						#DIV/0!	#N/A	#N/A		#DIV/0!		3
																						#DIV/0!	#N/A	#N/A		#DIV/0!		3
																						#DIV/0!	#N/A	#N/A		#DIV/0!		3
																						#DIV/0!	#N/A	#N/A		#DIV/0!		3
																						#DIV/0!	#N/A	#N/A		#DIV/0!		3
																						#DIV/0!	#N/A	#N/A		#DIV/0!		3
																						#DIV/0!	#N/A	#N/A		#DIV/0!		3
																						#DIV/0!	#N/A	#N/A		#DIV/0!		3
																						#DIV/0!	#N/A	#N/A		#DIV/0!		3
																						#DIV/0!	#N/A	#N/A		#DIV/0!		3
																						#DIV/0!	#N/A	#N/A		#DIV/0!		3
																						#DIV/0!	#N/A	#N/A		#DIV/0!		3
																						#DIV/0!	#N/A	#N/A		#DIV/0!		3
																						#DIV/0!	#N/A	#N/A		#DIV/0!		3
																						#DIV/0!	#N/A	#N/A		#DIV/0!		3
																						#DIV/0!	#N/A	#N/A		#DIV/0!		3
																						#DIV/0!	#N/A	#N/A		#DIV/0!		3
																						#DIV/0!	#N/A	#N/A		#DIV/0!		3
																						#DIV/0!	#N/A	#N/A		#DIV/0!		3
																						#DIV/0!	#N/A	#N/A		#DIV/0!		3
																						#DIV/0!	#N/A	#N/A		#DIV/0!		3
																						#DIV/0!	#N/A	#N/A		#DIV/0!		3
																						#DIV/0!	#N/A	#N/A		#DIV/0!		3
																						#DIV/0!	#N/A	#N/A		#DIV/0!		3
																						#DIV/0!	#N/A	#N/A		#DIV/0!		3
																						#DIV/0!	#N/A	#N/A		#DIV/0!		3
																						#DIV/0!	#N/A	#N/A		#DIV/0!		3
																						#DIV/0!	#N/A	#N/A		#DIV/0!		3
																						#DIV/0!	#N/A	#N/A		#DIV/0!		3
																						#DIV/0!	#N/A	#N/A		#DIV/0!		3
																						#DIV/0!	#N/A	#N/A		#DIV/0!		3
																						#DIV/0!	#N/A	#N/A		#DIV/0!		3
																						#DIV/0!	#N/A	#N/A		#DIV/0!		3
																						#DIV/0!	#N/A	#N/A		#DIV/0!		3
																						#DIV/0!	#N/A	#N/A		#DIV/0!		3
																						#DIV/0!	#N/A	#N/A		#DIV/0!		3
																						#DIV/0!	#N/A	#N/A		#DIV/0!		3
																						#DIV/0!	#N/A	#N/A		#DIV/0!		3
																						#DIV/0!	#N/A	#N/A		#DIV/0!		3
																						#DIV/0!	#N/A	#N/A		#DIV/0!		3
																						#DIV/0!	#N/A	#N/A		#DIV/0!		3
																						#DIV/0!	#N/A	#N/A		#DIV/0!		3
																						#DIV/0!	#N/A	#N/A		#DIV/0!		3
																						#DIV/0!	#N/A	#N/A		#DIV/0!		3
																						#DIV/0!	#N/A	#N/A		#DIV/0!		3
																						#DIV/0!	#N/A	#N/A		#DIV/0!		3
																						#DIV/0!	#N/A	#N/A		#DIV/0!		3
																						#DIV/0!	#N/A	#N/A		#DIV/0!		3
																						#DIV/0!	#N/A	#N/A		#DIV/0!		3
																						#DIV/0!	#N/A	#N/A		#DIV/0!		3
																						#DIV/0!	#N/A	#N/A		#DIV/0!		3
																						#DIV/0!	#N/A	#N/A		#DIV/0!		3
																						#DIV/0!	#N/A	#N/A		#DIV/0!		3
																						#DIV/0!	#N/A	#N/A		#DIV/0!		3
																						#DIV/0!	#N/A	#N/A		#DIV/0!		3
																						#DIV/0!	#N/A	#N/A		#DIV/0!		3
																						#DIV/0!	#N/A	#N/A		#DIV/0!		3
																						#DIV/0!	#N/A	#N/A		#DIV/0!		3
																						#DIV/0!	#N/A	#N/A		#DIV/0!		3
																						#DIV/0!	#N/A	#N/A		#DIV/0!		3
																						#DIV/0!	#N/A	#N/A		#DIV/0!		3
																						#DIV/0!	#N/A	#N/A		#DIV/0!		3
																						#DIV/0!	#N/A	#N/A		#DIV/0!		3
																						#DIV/0!	#N/A	#N/A		#DIV/0!		3
																						#DIV/0!	#N/A	#N/A		#DIV/0!		3
																						#DIV/0!	#N/A	#N/A		#DIV/0!		3
																						#DIV/0!	#N/A	#N/A		#DIV/0!		3
																						#DIV/0!	#N/A	#N/A		#DIV/0!		3
																						#DIV/0!	#N/A	#N/A		#DIV/0!		3
																						#DIV/0!	#N/A	#N/A		#DIV/0!		3
																						#DIV/0!	#N/A	#N/A		#DIV/0!		3
																						#DIV/0!	#N/A	#N/A		#DIV/0!		3
																						#DIV/0!	#N/A	#N/A		#DIV/0!		3
																						#DIV/0!	#N/A	#N/A		#DIV/0!		3
																						#DIV/0!	#N/A	#N/A		#DIV/0!		3
																						#DIV/0!	#N/A	#N/A		#DIV/0!		3
																						#DIV/0!	#N/A	#N/A		#DIV/0!		3
																						#DIV/0!	#N/A	#N/A		#DIV/0!		3
																						#DIV/0!	#N/A	#N/A		#DIV/0!		3
																						#DIV/0!	#N/A	#N/A		#DIV/0!		3
																						#DIV/0!	#N/A	#N/A		#DIV/0!		3
																						#DIV/0!	#N/A	#N/A		#DIV/0!		3
																						#DIV/0!	#N/A	#N/A		#DIV/0!		3
																						#DIV/0!	#N/A	#N/A		#DIV/0!		3
																						#DIV/0!	#N/A	#N/A		#DIV/0!		3
																						#DIV/0!	#N/A	#N/A		#DIV/0!		3
																						#DIV/0!	#N/A	#N/A		#DIV/0!		3
																						#DIV/0!	#N/A	#N/A		#DIV/0!		3
																						#DIV/0!	#N/A	#N/A		#DIV/0!		3
																						#DIV/0!	#N/A	#N/A		#DIV/0!		3
																						#DIV/0!	#N/A	#N/A		#DIV/0!		3
																						#DIV/0!	#N/A	#N/A		#DIV/0!		3
																						#DIV/0!	#N/A	#N/A		#DIV/0!		3
																						#DIV/0!	#N/A	#N/A		#DIV/0!		3
																						#DIV/0!	#N/A	#N/A		#DIV/0!		3
																						#DIV/0!	#N/A	#N/A		#DIV/0!		3
																						#DIV/0!	#N/A	#N/A		#DIV/0!		3
																						#DIV/0!	#N/A	#N/A		#DIV/0!		3
																						#DIV/0!	#N/A	#N/A		#DIV/0!		3
																						#DIV/0!	#N/A	#N/A		#DIV/0!		3
																						#DIV/0!	#N/A	#N/A		#DIV/0!		3
																						#DIV/0!	#N/A	#N/A		#DIV/0!		3
																						#DIV/0!	#N/A	#N/A		#DIV/0!		3
																						#DIV/0!	#N/A	#N/A		#DIV/0!		3
																						#DIV/0!	#N/A	#N/A		#DIV/0!		3
																						#DIV/0!	#N/A	#N/A		#DIV/0!		3
																						#DIV/0!	#N/A	#N/A		#DIV/0!		3
																						#DIV/0!	#N/A	#N/A		#DIV/0!		3
																						#DIV/0!	#N/A	#N/A		#DIV/0!		3
																						#DIV/0!	#N/A	#N/A		#DIV/0!		3
																						#DIV/0!	#N/A	#N/A		#DIV/0!		3
																						#DIV/0!	#N/A	#N/A		#DIV/0!		3
																						#DIV/0!	#N/A	#N/A		#DIV/0!		3
																						#DIV/0!	#N/A	#N/A		#DIV/0!		3
																						#DIV/0!	#N/A	#N/A		#DIV/0!		3
																						#DIV/0!	#N/A	#N/A		#DIV/0!		3
																						#DIV/0!	#N/A	#N/A		#DIV/0!		3
																						#DIV/0!	#N/A	#N/A		#DIV/0!		3
																						#DIV/0!	#N/A	#N/A		#DIV/0!		3
																						#DIV/0!	#N/A	#N/A		#DIV/0!		3
																						#DIV/0!	#N/A	#N/A		#DIV/0!		3
																						#DIV/0!	#N/A	#N/A		#DIV/0!		3
																						#DIV/0!	#N/A	#N/A		#DIV/0!		3
																						#DIV/0!	#N/A	#N/A		#DIV/0!		3
																						#DIV/0!	#N/A	#N/A		#DIV/0!		3
[truncated: 54 more columns]

## Sheet: partial Mixed Non-competitive
																		(V_max*((1+([I]/(K_i^' ))*(β))*([S]/K_s )))/((1+([I]/(K_i^' )))*(([S]/K_s )+((1+([I]/(K_i^' ))*((K_s^')/K_s )))/((1+([I]/(K_i^' ))) )) )					Calculated values
		No Inhibitor	[I]1	[I]2	[I]3	[I]4	[I]5	[I]6	[I]7	[I]8	[I]9	[I]10	[I]11	[I]12	[I]13	[I]14	[I]15	Ks			Ks'		No Inhibitor	[I]1	[I]2	[I]3	[I]4	[I]5	[I]6	[I]7	[I]8	[I]9	[I]10	[I]11	[I]12	[I]13	[I]14	[I]15
		0	1	2	3	4	5	0	0	0	0	0	0	0	0	0	0	Km	Vmax	Ki'	Km'	b	0	1	2	3	4	5	0	0	0	0	0	0	0	0	0	0
[S]1	2	0.51	0.505	0.502	0.499	0.496	0.493	0	0	0	0	0	0	0	0	0	0	4.82882	1.7397	11.3831	3.22216	0.667156	0.509518	0.505426	0.501818	0.498614	0.495749	0.493172	#DIV/0!	#DIV/0!	#DIV/0!	#DIV/0!	#DIV/0!	#DIV/0!	#DIV/0!	#DIV/0!	#DIV/0!	#DIV/0!		0.509518	0.505426	0.501818	0.498614	0.495749	0.493172	0	0	0	0
[S]2	2.5	0.593	0.588	0.583	0.579	0.575	0.571	0	0	0	0	0	0	0	0	0	0						0.593446	0.587903	0.583028	0.578708	0.574853	0.571392	#DIV/0!	#DIV/0!	#DIV/0!	#DIV/0!	#DIV/0!	#DIV/0!	#DIV/0!	#DIV/0!	#DIV/0!	#DIV/0!		0.593446	0.587903	0.583028	0.578708	0.574853	0.571392	0	0	0	0
[S]3	3.33	0.71	0.702	0.695	0.689	0.683	0.679	0	0	0	0	0	0	0	0	0	0			Sum R2	1.98394e-06		0.710055	0.702135	0.695195	0.689063	0.683605	0.678717	#DIV/0!	#DIV/0!	#DIV/0!	#DIV/0!	#DIV/0!	#DIV/0!	#DIV/0!	#DIV/0!	#DIV/0!	#DIV/0!		0.710055	0.702135	0.695195	0.689063	0.683605	0.678717	0	0	0	0
[S]4	5	0.885	0.873	0.862	0.853	0.844	0.837	0	0	0	0	0	0	0	0	0	0			Sum residuals %	0.00944501		0.885001	0.872734	0.862039	0.852631	0.844293	0.83685	#DIV/0!	#DIV/0!	#DIV/0!	#DIV/0!	#DIV/0!	#DIV/0!	#DIV/0!	#DIV/0!	#DIV/0!	#DIV/0!		0.885001	0.872734	0.862039	0.852631	0.844293	0.83685	0	0	0	0
[S]5	0	0	0	0	0	0	0	0	0	0	0	0	0	0	0	0	0						#DIV/0!	#DIV/0!	#DIV/0!	#DIV/0!	#DIV/0!	#DIV/0!	#DIV/0!	#DIV/0!	#DIV/0!	#DIV/0!	#DIV/0!	#DIV/0!	#DIV/0!	#DIV/0!	#DIV/0!	#DIV/0!		0	0	0	0	0	0	0	0	0	0
[S]6	0	0	0	0	0	0	0	0	0	0	0	0	0	0	0	0	0						#DIV/0!	#DIV/0!	#DIV/0!	#DIV/0!	#DIV/0!	#DIV/0!	#DIV/0!	#DIV/0!	#DIV/0!	#DIV/0!	#DIV/0!	#DIV/0!	#DIV/0!	#DIV/0!	#DIV/0!	#DIV/0!		0	0	0	0	0	0	0	0	0	0
[S]7	0	0	0	0	0	0	0	0	0	0	0	0	0	0	0	0	0						#DIV/0!	#DIV/0!	#DIV/0!	#DIV/0!	#DIV/0!	#DIV/0!	#DIV/0!	#DIV/0!	#DIV/0!	#DIV/0!	#DIV/0!	#DIV/0!	#DIV/0!	#DIV/0!	#DIV/0!	#DIV/0!		0	0	0	0	0	0	0	0	0	0
[S]8	0	0	0	0	0	0	0	0	0	0	0	0	0	0	0	0	0						#DIV/0!	#DIV/0!	#DIV/0!	#DIV/0!	#DIV/0!	#DIV/0!	#DIV/0!	#DIV/0!	#DIV/0!	#DIV/0!	#DIV/0!	#DIV/0!	#DIV/0!	#DIV/0!	#DIV/0!	#DIV/0!		0	0	0	0	0	0	0	0	0	0
[S]9	0	0	0	0	0	0	0	0	0	0	0	0	0	0	0	0	0						#DIV/0!	#DIV/0!	#DIV/0!	#DIV/0!	#DIV/0!	#DIV/0!	#DIV/0!	#DIV/0!	#DIV/0!	#DIV/0!	#DIV/0!	#DIV/0!	#DIV/0!	#DIV/0!	#DIV/0!	#DIV/0!		0	0	0	0	0	0	0	0	0	0
[S]10	0	0	0	0	0	0	0	0	0	0	0	0	0	0	0	0	0						#DIV/0!	#DIV/0!	#DIV/0!	#DIV/0!	#DIV/0!	#DIV/0!	#DIV/0!	#DIV/0!	#DIV/0!	#DIV/0!	#DIV/0!	#DIV/0!	#DIV/0!	#DIV/0!	#DIV/0!	#DIV/0!		0	0	0	0	0	0	0	0	0	0
[S]11	0	0	0	0	0	0	0	0	0	0	0	0	0	0	0	0	0						#DIV/0!	#DIV/0!	#DIV/0!	#DIV/0!	#DIV/0!	#DIV/0!	#DIV/0!	#DIV/0!	#DIV/0!	#DIV/0!	#DIV/0!	#DIV/0!	#DIV/0!	#DIV/0!	#DIV/0!	#DIV/0!		0	0	0	0	0	0	0	0	0	0
[S]12	0	0	0	0	0	0	0	0	0	0	0	0	0	0	0	0	0						#DIV/0!	#DIV/0!	#DIV/0!	#DIV/0!	#DIV/0!	#DIV/0!	#DIV/0!	#DIV/0!	#DIV/0!	#DIV/0!	#DIV/0!	#DIV/0!	#DIV/0!	#DIV/0!	#DIV/0!	#DIV/0!		0	0	0	0	0	0	0	0	0	0
[S]13	0	0	0	0	0	0	0	0	0	0	0	0	0	0	0	0	0						#DIV/0!	#DIV/0!	#DIV/0!	#DIV/0!	#DIV/0!	#DIV/0!	#DIV/0!	#DIV/0!	#DIV/0!	#DIV/0!	#DIV/0!	#DIV/0!	#DIV/0!	#DIV/0!	#DIV/0!	#DIV/0!		0	0	0	0	0	0	0	0	0	0
[S]14	0	0	0	0	0	0	0	0	0	0	0	0	0	0	0	0	0						#DIV/0!	#DIV/0!	#DIV/0!	#DIV/0!	#DIV/0!	#DIV/0!	#DIV/0!	#DIV/0!	#DIV/0!	#DIV/0!	#DIV/0!	#DIV/0!	#DIV/0!	#DIV/0!	#DIV/0!	#DIV/0!		0	0	0	0	0	0	0	0	0	0
[S]15	0	0	0	0	0	0	0	0	0	0	0	0	0	0	0	0	0						#DIV/0!	#DIV/0!	#DIV/0!	#DIV/0!	#DIV/0!	#DIV/0!	#DIV/0!	#DIV/0!	#DIV/0!	#DIV/0!	#DIV/0!	#DIV/0!	#DIV/0!	#DIV/0!	#DIV/0!	#DIV/0!		0	0	0	0	0	0	0	0	0	0
	1	1	1	1	1	1	1	#DIV/0!	#DIV/0!	#DIV/0!	#DIV/0!	#DIV/0!	#DIV/0!	#DIV/0!	#DIV/0!	#DIV/0!	#DIV/0!																					2	2	0.509518	0.505426	0.501818	0.498614	0.495749	0.493172	#N/A	#N/A	#N/A	#N/A
	1	1	1	1	1	1	1	#DIV/0!	#DIV/0!	#DIV/0!	#DIV/0!	#DIV/0!	#DIV/0!	#DIV/0!	#DIV/0!	#DIV/0!	#DIV/0!					0.51	0.51	0.509518		-0.00048196	-0.00048196	4										2.5	2.5	0.593446	0.587903	0.583028	0.578708	0.574853	0.571392	#N/A	#N/A	#N/A	#N/A
	1	1	1	1	1	1	1	#DIV/0!	#DIV/0!	#DIV/0!	#DIV/0!	#DIV/0!	#DIV/0!	#DIV/0!	#DIV/0!	#DIV/0!	#DIV/0!					0.593	0.593	0.593446		0.000445984	0.000445984	4										3.33	3.33	0.710055	0.702135	0.695195	0.689063	0.683605	0.678717	#N/A	#N/A	#N/A	#N/A
	1	1	1	1	1	1	1	#DIV/0!	#DIV/0!	#DIV/0!	#DIV/0!	#DIV/0!	#DIV/0!	#DIV/0!	#DIV/0!	#DIV/0!	#DIV/0!					0.71	0.71	0.710055		5.52343e-05	5.52343e-05	4										5	5	0.885001	0.872734	0.862039	0.852631	0.844293	0.83685	#N/A	#N/A	#N/A	#N/A
	#DIV/0!	#DIV/0!	#DIV/0!	#DIV/0!	#DIV/0!	#DIV/0!	#DIV/0!	#DIV/0!	#DIV/0!	#DIV/0!	#DIV/0!	#DIV/0!	#DIV/0!	#DIV/0!	#DIV/0!	#DIV/0!	#DIV/0!					0.885	0.885	0.885001		1.25962e-06	1.25962e-06	4										#DIV/0!	#N/A	#N/A	#N/A	#N/A	#N/A	#N/A	#N/A	#N/A	#N/A	#N/A	#N/A
	#DIV/0!	#DIV/0!	#DIV/0!	#DIV/0!	#DIV/0!	#DIV/0!	#DIV/0!	#DIV/0!	#DIV/0!	#DIV/0!	#DIV/0!	#DIV/0!	#DIV/0!	#DIV/0!	#DIV/0!	#DIV/0!	#DIV/0!					#DIV/0!	#N/A	#N/A		#DIV/0!		4										#DIV/0!	#N/A	#N/A	#N/A	#N/A	#N/A	#N/A	#N/A	#N/A	#N/A	#N/A	#N/A
	#DIV/0!	#DIV/0!	#DIV/0!	#DIV/0!	#DIV/0!	#DIV/0!	#DIV/0!	#DIV/0!	#DIV/0!	#DIV/0!	#DIV/0!	#DIV/0!	#DIV/0!	#DIV/0!	#DIV/0!	#DIV/0!	#DIV/0!					#DIV/0!	#N/A	#N/A		#DIV/0!		4										#DIV/0!	#N/A	#N/A	#N/A	#N/A	#N/A	#N/A	#N/A	#N/A	#N/A	#N/A	#N/A
	#DIV/0!	#DIV/0!	#DIV/0!	#DIV/0!	#DIV/0!	#DIV/0!	#DIV/0!	#DIV/0!	#DIV/0!	#DIV/0!	#DIV/0!	#DIV/0!	#DIV/0!	#DIV/0!	#DIV/0!	#DIV/0!	#DIV/0!					#DIV/0!	#N/A	#N/A		#DIV/0!		4										#DIV/0!	#N/A	#N/A	#N/A	#N/A	#N/A	#N/A	#N/A	#N/A	#N/A	#N/A	#N/A
	#DIV/0!	#DIV/0!	#DIV/0!	#DIV/0!	#DIV/0!	#DIV/0!	#DIV/0!	#DIV/0!	#DIV/0!	#DIV/0!	#DIV/0!	#DIV/0!	#DIV/0!	#DIV/0!	#DIV/0!	#DIV/0!	#DIV/0!					#DIV/0!	#N/A	#N/A		#DIV/0!		4										#DIV/0!	#N/A	#N/A	#N/A	#N/A	#N/A	#N/A	#N/A	#N/A	#N/A	#N/A	#N/A
	#DIV/0!	#DIV/0!	#DIV/0!	#DIV/0!	#DIV/0!	#DIV/0!	#DIV/0!	#DIV/0!	#DIV/0!	#DIV/0!	#DIV/0!	#DIV/0!	#DIV/0!	#DIV/0!	#DIV/0!	#DIV/0!	#DIV/0!					#DIV/0!	#N/A	#N/A		#DIV/0!		4										#DIV/0!	#N/A	#N/A	#N/A	#N/A	#N/A	#N/A	#N/A	#N/A	#N/A	#N/A	#N/A
	#DIV/0!	#DIV/0!	#DIV/0!	#DIV/0!	#DIV/0!	#DIV/0!	#DIV/0!	#DIV/0!	#DIV/0!	#DIV/0!	#DIV/0!	#DIV/0!	#DIV/0!	#DIV/0!	#DIV/0!	#DIV/0!	#DIV/0!					#DIV/0!	#N/A	#N/A		#DIV/0!		4										#DIV/0!	#N/A	#N/A	#N/A	#N/A	#N/A	#N/A	#N/A	#N/A	#N/A	#N/A	#N/A
	#DIV/0!	#DIV/0!	#DIV/0!	#DIV/0!	#DIV/0!	#DIV/0!	#DIV/0!	#DIV/0!	#DIV/0!	#DIV/0!	#DIV/0!	#DIV/0!	#DIV/0!	#DIV/0!	#DIV/0!	#DIV/0!	#DIV/0!					#DIV/0!	#N/A	#N/A		#DIV/0!		4										#DIV/0!	#N/A	#N/A	#N/A	#N/A	#N/A	#N/A	#N/A	#N/A	#N/A	#N/A	#N/A
	#DIV/0!	#DIV/0!	#DIV/0!	#DIV/0!	#DIV/0!	#DIV/0!	#DIV/0!	#DIV/0!	#DIV/0!	#DIV/0!	#DIV/0!	#DIV/0!	#DIV/0!	#DIV/0!	#DIV/0!	#DIV/0!	#DIV/0!					#DIV/0!	#N/A	#N/A		#DIV/0!		4										#DIV/0!	#N/A	#N/A	#N/A	#N/A	#N/A	#N/A	#N/A	#N/A	#N/A	#N/A	#N/A
	#DIV/0!	#DIV/0!	#DIV/0!	#DIV/0!	#DIV/0!	#DIV/0!	#DIV/0!	#DIV/0!	#DIV/0!	#DIV/0!	#DIV/0!	#DIV/0!	#DIV/0!	#DIV/0!	#DIV/0!	#DIV/0!	#DIV/0!					#DIV/0!	#N/A	#N/A		#DIV/0!		4										#DIV/0!	#N/A	#N/A	#N/A	#N/A	#N/A	#N/A	#N/A	#N/A	#N/A	#N/A	#N/A
	#DIV/0!	#DIV/0!	#DIV/0!	#DIV/0!	#DIV/0!	#DIV/0!	#DIV/0!	#DIV/0!	#DIV/0!	#DIV/0!	#DIV/0!	#DIV/0!	#DIV/0!	#DIV/0!	#DIV/0!	#DIV/0!	#DIV/0!					#DIV/0!	#N/A	#N/A		#DIV/0!		4										#DIV/0!	#N/A	#N/A	#N/A	#N/A	#N/A	#N/A	#N/A	#N/A	#N/A	#N/A	#N/A
																						#DIV/0!	#N/A	#N/A		#DIV/0!		4
																						0.505	0.505	0.505426		0.000425739	0.000425739	4											0.5	1.96264	1.97853	1.99275	2.00556	2.01715	2.02769	#N/A	#N/A	#N/A	#N/A
																						0.588	0.588	0.587903		-9.7226e-05	-9.7226e-05	4											0.4	1.68507	1.70096	1.71518	1.72799	1.73957	1.75011	#N/A	#N/A	#N/A	#N/A
																						0.702	0.702	0.702135		0.000135476	0.000135476	4											0.3003	1.40834	1.42423	1.43845	1.45125	1.46283	1.47337	#N/A	#N/A	#N/A	#N/A
																						0.873	0.873	0.872734		-0.000266024	-0.000266024	4											0.2	1.12994	1.14582	1.16004	1.17284	1.18442	1.19496	#N/A	#N/A	#N/A	#N/A
																						#DIV/0!	#N/A	#N/A		#DIV/0!		4											#N/A	#N/A	#N/A	#N/A	#N/A	#N/A	#N/A	#N/A	#N/A	#N/A	#N/A
																						#DIV/0!	#N/A	#N/A		#DIV/0!		4											#N/A	#N/A	#N/A	#N/A	#N/A	#N/A	#N/A	#N/A	#N/A	#N/A	#N/A
																						#DIV/0!	#N/A	#N/A		#DIV/0!		4											#N/A	#N/A	#N/A	#N/A	#N/A	#N/A	#N/A	#N/A	#N/A	#N/A	#N/A
																						#DIV/0!	#N/A	#N/A		#DIV/0!		4											#N/A	#N/A	#N/A	#N/A	#N/A	#N/A	#N/A	#N/A	#N/A	#N/A	#N/A
																						#DIV/0!	#N/A	#N/A		#DIV/0!		4											#N/A	#N/A	#N/A	#N/A	#N/A	#N/A	#N/A	#N/A	#N/A	#N/A	#N/A
																						#DIV/0!	#N/A	#N/A		#DIV/0!		4											#N/A	#N/A	#N/A	#N/A	#N/A	#N/A	#N/A	#N/A	#N/A	#N/A	#N/A
																						#DIV/0!	#N/A	#N/A		#DIV/0!		4											#N/A	#N/A	#N/A	#N/A	#N/A	#N/A	#N/A	#N/A	#N/A	#N/A	#N/A
																						#DIV/0!	#N/A	#N/A		#DIV/0!		4											#N/A	#N/A	#N/A	#N/A	#N/A	#N/A	#N/A	#N/A	#N/A	#N/A	#N/A
																						#DIV/0!	#N/A	#N/A		#DIV/0!		4											#N/A	#N/A	#N/A	#N/A	#N/A	#N/A	#N/A	#N/A	#N/A	#N/A	#N/A
																						#DIV/0!	#N/A	#N/A		#DIV/0!		4											#N/A	#N/A	#N/A	#N/A	#N/A	#N/A	#N/A	#N/A	#N/A	#N/A	#N/A
																						#DIV/0!	#N/A	#N/A		#DIV/0!		4											#N/A	#N/A	#N/A	#N/A	#N/A	#N/A	#N/A	#N/A	#N/A	#N/A	#N/A
																						0.502	0.502	0.501818		-0.000181841	-0.000181841	4
																						0.583	0.583	0.583028		2.82586e-05	2.82586e-05	4												0.51	0.505	0.502	0.499	0.496	0.493	#DIV/0!	#DIV/0!	#DIV/0!	#DIV/0!
																						0.695	0.695	0.695195		0.000195019	0.000195019	4												0.593	0.588	0.583	0.579	0.575	0.571	#DIV/0!	#DIV/0!	#DIV/0!	#DIV/0!
																						0.862	0.862	0.862039		3.86771e-05	3.86771e-05	4												0.71	0.702	0.695	0.689	0.683	0.679	#DIV/0!	#DIV/0!	#DIV/0!	#DIV/0!
																						#DIV/0!	#N/A	#N/A		#DIV/0!		4												0.885	0.873	0.862	0.853	0.844	0.837	#DIV/0!	#DIV/0!	#DIV/0!	#DIV/0!
																						#DIV/0!	#N/A	#N/A		#DIV/0!		4												#DIV/0!	#DIV/0!	#DIV/0!	#DIV/0!	#DIV/0!	#DIV/0!	#DIV/0!	#DIV/0!	#DIV/0!	#DIV/0!
																						#DIV/0!	#N/A	#N/A		#DIV/0!		4												#DIV/0!	#DIV/0!	#DIV/0!	#DIV/0!	#DIV/0!	#DIV/0!	#DIV/0!	#DIV/0!	#DIV/0!	#DIV/0!
																						#DIV/0!	#N/A	#N/A		#DIV/0!		4												#DIV/0!	#DIV/0!	#DIV/0!	#DIV/0!	#DIV/0!	#DIV/0!	#DIV/0!	#DIV/0!	#DIV/0!	#DIV/0!
																						#DIV/0!	#N/A	#N/A		#DIV/0!		4												#DIV/0!	#DIV/0!	#DIV/0!	#DIV/0!	#DIV/0!	#DIV/0!	#DIV/0!	#DIV/0!	#DIV/0!	#DIV/0!
																						#DIV/0!	#N/A	#N/A		#DIV/0!		4												#DIV/0!	#DIV/0!	#DIV/0!	#DIV/0!	#DIV/0!	#DIV/0!	#DIV/0!	#DIV/0!	#DIV/0!	#DIV/0!
																						#DIV/0!	#N/A	#N/A		#DIV/0!		4												#DIV/0!	#DIV/0!	#DIV/0!	#DIV/0!	#DIV/0!	#DIV/0!	#DIV/0!	#DIV/0!	#DIV/0!	#DIV/0!
																						#DIV/0!	#N/A	#N/A		#DIV/0!		4												#DIV/0!	#DIV/0!	#DIV/0!	#DIV/0!	#DIV/0!	#DIV/0!	#DIV/0!	#DIV/0!	#DIV/0!	#DIV/0!
																						#DIV/0!	#N/A	#N/A		#DIV/0!		4												#DIV/0!	#DIV/0!	#DIV/0!	#DIV/0!	#DIV/0!	#DIV/0!	#DIV/0!	#DIV/0!	#DIV/0!	#DIV/0!
																						#DIV/0!	#N/A	#N/A		#DIV/0!		4												#DIV/0!	#DIV/0!	#DIV/0!	#DIV/0!	#DIV/0!	#DIV/0!	#DIV/0!	#DIV/0!	#DIV/0!	#DIV/0!
																						#DIV/0!	#N/A	#N/A		#DIV/0!		4												#DIV/0!	#DIV/0!	#DIV/0!	#DIV/0!	#DIV/0!	#DIV/0!	#DIV/0!	#DIV/0!	#DIV/0!	#DIV/0!
																						0.499	0.499	0.498614		-0.000386007	-0.000386007	4												#DIV/0!	#DIV/0!	#DIV/0!	#DIV/0!	#DIV/0!	#DIV/0!	#DIV/0!	#DIV/0!	#DIV/0!	#DIV/0!
																						0.579	0.579	0.578708		-0.000291679	-0.000291679	4
																						0.689	0.689	0.689063		6.27973e-05	6.27973e-05	4												1/s	0	1	2	3	4	5	0	0	0
																						0.853	0.853	0.852631		-0.000368605	-0.000368605	4											1	0.5	1.96264	1.97853	1.99275	2.00556	2.01715	2.02769	#N/A	#N/A	#N/A
																						#DIV/0!	#N/A	#N/A		#DIV/0!		4											2	0.4	1.68507	1.70096	1.71518	1.72799	1.73957	1.75011	#N/A	#N/A	#N/A
																						#DIV/0!	#N/A	#N/A		#DIV/0!		4											3	0.3003	1.40834	1.42423	1.43845	1.45125	1.46283	1.47337	#N/A	#N/A	#N/A
																						#DIV/0!	#N/A	#N/A		#DIV/0!		4											4	0.2	1.12994	1.14582	1.16004	1.17284	1.18442	1.19496	#N/A	#N/A	#N/A
																						#DIV/0!	#N/A	#N/A		#DIV/0!		4											5	#N/A	#N/A	#N/A	#N/A	#N/A	#N/A	#N/A	#N/A	#N/A	#N/A
																						#DIV/0!	#N/A	#N/A		#DIV/0!		4											6	#N/A	#N/A	#N/A	#N/A	#N/A	#N/A	#N/A	#N/A	#N/A	#N/A
																						#DIV/0!	#N/A	#N/A		#DIV/0!		4											7	#N/A	#N/A	#N/A	#N/A	#N/A	#N/A	#N/A	#N/A	#N/A	#N/A
																						#DIV/0!	#N/A	#N/A		#DIV/0!		4											8	#N/A	#N/A	#N/A	#N/A	#N/A	#N/A	#N/A	#N/A	#N/A	#N/A
																						#DIV/0!	#N/A	#N/A		#DIV/0!		4											9	#N/A	#N/A	#N/A	#N/A	#N/A	#N/A	#N/A	#N/A	#N/A	#N/A
																						#DIV/0!	#N/A	#N/A		#DIV/0!		4											10	#N/A	#N/A	#N/A	#N/A	#N/A	#N/A	#N/A	#N/A	#N/A	#N/A
																						#DIV/0!	#N/A	#N/A		#DIV/0!		4											11	#N/A	#N/A	#N/A	#N/A	#N/A	#N/A	#N/A	#N/A	#N/A	#N/A
																						#DIV/0!	#N/A	#N/A		#DIV/0!		4											12	#N/A	#N/A	#N/A	#N/A	#N/A	#N/A	#N/A	#N/A	#N/A	#N/A
																						0.496	0.496	0.495749		-0.000250842	-0.000250842	4											13	#N/A	#N/A	#N/A	#N/A	#N/A	#N/A	#N/A	#N/A	#N/A	#N/A
																						0.575	0.575	0.574853		-0.000146587	-0.000146587	4											14	#N/A	#N/A	#N/A	#N/A	#N/A	#N/A	#N/A	#N/A	#N/A	#N/A
																						0.683	0.683	0.683605		0.000605399	0.000605399	4											15	#N/A	#N/A	#N/A	#N/A	#N/A	#N/A	#N/A	#N/A	#N/A	#N/A
																						0.844	0.844	0.844293		0.000292673	0.000292673	4
																						#DIV/0!	#N/A	#N/A		#DIV/0!		4
																						#DIV/0!	#N/A	#N/A		#DIV/0!		4
																						#DIV/0!	#N/A	#N/A		#DIV/0!		4
																						#DIV/0!	#N/A	#N/A		#DIV/0!		4
																						#DIV/0!	#N/A	#N/A		#DIV/0!		4
																						#DIV/0!	#N/A	#N/A		#DIV/0!		4
																						#DIV/0!	#N/A	#N/A		#DIV/0!		4
																						#DIV/0!	#N/A	#N/A		#DIV/0!		4
																						#DIV/0!	#N/A	#N/A		#DIV/0!		4
																						#DIV/0!	#N/A	#N/A		#DIV/0!		4
																						#DIV/0!	#N/A	#N/A		#DIV/0!		4
																						0.493	0.493	0.493172		0.00017246	0.00017246	4
																						0.571	0.571	0.571392		0.000392281	0.000392281	4
																						0.679	0.679	0.678717		-0.00028276	-0.00028276	4
																						0.837	0.837	0.83685		-0.000149769	-0.000149769	4
																						#DIV/0!	#N/A	#N/A		#DIV/0!		4
																						#DIV/0!	#N/A	#N/A		#DIV/0!		4
																						#DIV/0!	#N/A	#N/A		#DIV/0!		4
																						#DIV/0!	#N/A	#N/A		#DIV/0!		4
																						#DIV/0!	#N/A	#N/A		#DIV/0!		4
																						#DIV/0!	#N/A	#N/A		#DIV/0!		4
																						#DIV/0!	#N/A	#N/A		#DIV/0!		4
																						#DIV/0!	#N/A	#N/A		#DIV/0!		4
																						#DIV/0!	#N/A	#N/A		#DIV/0!		4
																						#DIV/0!	#N/A	#N/A		#DIV/0!		4
																						#DIV/0!	#N/A	#N/A		#DIV/0!		4
																						#DIV/0!	#N/A	#N/A		#DIV/0!		4
																						#DIV/0!	#N/A	#N/A		#DIV/0!		4
																						#DIV/0!	#N/A	#N/A		#DIV/0!		4
																						#DIV/0!	#N/A	#N/A		#DIV/0!		4
																						#DIV/0!	#N/A	#N/A		#DIV/0!		4
																						#DIV/0!	#N/A	#N/A		#DIV/0!		4
																						#DIV/0!	#N/A	#N/A		#DIV/0!		4
																						#DIV/0!	#N/A	#N/A		#DIV/0!		4
																						#DIV/0!	#N/A	#N/A		#DIV/0!		4
																						#DIV/0!	#N/A	#N/A		#DIV/0!		4
																						#DIV/0!	#N/A	#N/A		#DIV/0!		4
																						#DIV/0!	#N/A	#N/A		#DIV/0!		4
																						#DIV/0!	#N/A	#N/A		#DIV/0!		4
																						#DIV/0!	#N/A	#N/A		#DIV/0!		4
																						#DIV/0!	#N/A	#N/A		#DIV/0!		4
																						#DIV/0!	#N/A	#N/A		#DIV/0!		4
																						#DIV/0!	#N/A	#N/A		#DIV/0!		4
																						#DIV/0!	#N/A	#N/A		#DIV/0!		4
																						#DIV/0!	#N/A	#N/A		#DIV/0!		4
																						#DIV/0!	#N/A	#N/A		#DIV/0!		4
																						#DIV/0!	#N/A	#N/A		#DIV/0!		4
																						#DIV/0!	#N/A	#N/A		#DIV/0!		4
																						#DIV/0!	#N/A	#N/A		#DIV/0!		4
																						#DIV/0!	#N/A	#N/A		#DIV/0!		4
																						#DIV/0!	#N/A	#N/A		#DIV/0!		4
																						#DIV/0!	#N/A	#N/A		#DIV/0!		4
																						#DIV/0!	#N/A	#N/A		#DIV/0!		4
																						#DIV/0!	#N/A	#N/A		#DIV/0!		4
																						#DIV/0!	#N/A	#N/A		#DIV/0!		4
																						#DIV/0!	#N/A	#N/A		#DIV/0!		4
																						#DIV/0!	#N/A	#N/A		#DIV/0!		4
																						#DIV/0!	#N/A	#N/A		#DIV/0!		4
																						#DIV/0!	#N/A	#N/A		#DIV/0!		4
																						#DIV/0!	#N/A	#N/A		#DIV/0!		4
																						#DIV/0!	#N/A	#N/A		#DIV/0!		4
																						#DIV/0!	#N/A	#N/A		#DIV/0!		4
																						#DIV/0!	#N/A	#N/A		#DIV/0!		4
																						#DIV/0!	#N/A	#N/A		#DIV/0!		4
																						#DIV/0!	#N/A	#N/A		#DIV/0!		4
																						#DIV/0!	#N/A	#N/A		#DIV/0!		4
																						#DIV/0!	#N/A	#N/A		#DIV/0!		4
																						#DIV/0!	#N/A	#N/A		#DIV/0!		4
																						#DIV/0!	#N/A	#N/A		#DIV/0!		4
																						#DIV/0!	#N/A	#N/A		#DIV/0!		4
																						#DIV/0!	#N/A	#N/A		#DIV/0!		4
																						#DIV/0!	#N/A	#N/A		#DIV/0!		4
																						#DIV/0!	#N/A	#N/A		#DIV/0!		4
																						#DIV/0!	#N/A	#N/A		#DIV/0!		4
																						#DIV/0!	#N/A	#N/A		#DIV/0!		4
																						#DIV/0!	#N/A	#N/A		#DIV/0!		4
																						#DIV/0!	#N/A	#N/A		#DIV/0!		4
																						#DIV/0!	#N/A	#N/A		#DIV/0!		4
																						#DIV/0!	#N/A	#N/A		#DIV/0!		4
																						#DIV/0!	#N/A	#N/A		#DIV/0!		4
																						#DIV/0!	#N/A	#N/A		#DIV/0!		4
																						#DIV/0!	#N/A	#N/A		#DIV/0!		4
																						#DIV/0!	#N/A	#N/A		#DIV/0!		4
																						#DIV/0!	#N/A	#N/A		#DIV/0!		4
																						#DIV/0!	#N/A	#N/A		#DIV/0!		4
																						#DIV/0!	#N/A	#N/A		#DIV/0!		4
																						#DIV/0!	#N/A	#N/A		#DIV/0!		4
																						#DIV/0!	#N/A	#N/A		#DIV/0!		4
																						#DIV/0!	#N/A	#N/A		#DIV/0!		4
																						#DIV/0!	#N/A	#N/A		#DIV/0!		4
																						#DIV/0!	#N/A	#N/A		#DIV/0!		4
																						#DIV/0!	#N/A	#N/A		#DIV/0!		4
																						#DIV/0!	#N/A	#N/A		#DIV/0!		4
																						#DIV/0!	#N/A	#N/A		#DIV/0!		4
																						#DIV/0!	#N/A	#N/A		#DIV/0!		4
																						#DIV/0!	#N/A	#N/A		#DIV/0!		4
																						#DIV/0!	#N/A	#N/A		#DIV/0!		4
																						#DIV/0!	#N/A	#N/A		#DIV/0!		4
																						#DIV/0!	#N/A	#N/A		#DIV/0!		4
																						#DIV/0!	#N/A	#N/A		#DIV/0!		4
																						#DIV/0!	#N/A	#N/A		#DIV/0!		4
																						#DIV/0!	#N/A	#N/A		#DIV/0!		4
																						#DIV/0!	#N/A	#N/A		#DIV/0!		4
																						#DIV/0!	#N/A	#N/A		#DIV/0!		4
																						#DIV/0!	#N/A	#N/A		#DIV/0!		4
																						#DIV/0!	#N/A	#N/A		#DIV/0!		4
																						#DIV/0!	#N/A	#N/A		#DIV/0!		4
																						#DIV/0!	#N/A	#N/A		#DIV/0!		4
																						#DIV/0!	#N/A	#N/A		#DIV/0!		4
																						#DIV/0!	#N/A	#N/A		#DIV/0!		4
																						#DIV/0!	#N/A	#N/A		#DIV/0!		4
																						#DIV/0!	#N/A	#N/A		#DIV/0!		4
																						#DIV/0!	#N/A	#N/A		#DIV/0!		4
																						#DIV/0!	#N/A	#N/A		#DIV/0!		4
																						#DIV/0!	#N/A	#N/A		#DIV/0!		4
																						#DIV/0!	#N/A	#N/A		#DIV/0!		4
																						#DIV/0!	#N/A	#N/A		#DIV/0!		4
																						#DIV/0!	#N/A	#N/A		#DIV/0!		4
																						#DIV/0!	#N/A	#N/A		#DIV/0!		4
																						#DIV/0!	#N/A	#N/A		#DIV/0!		4
																						#DIV/0!	#N/A	#N/A		#DIV/0!		4
																						#DIV/0!	#N/A	#N/A		#DIV/0!		4
																						#DIV/0!	#N/A	#N/A		#DIV/0!		4
																						#DIV/0!	#N/A	#N/A		#DIV/0!		4
																						#DIV/0!	#N/A	#N/A		#DIV/0!		4
																						#DIV/0!	#N/A	#N/A		#DIV/0!		4
																						#DIV/0!	#N/A	#N/A		#DIV/0!		4
																						#DIV/0!	#N/A	#N/A		#DIV/0!		4
																						#DIV/0!	#N/A	#N/A		#DIV/0!		4
																						#DIV/0!	#N/A	#N/A		#DIV/0!		4
																						#DIV/0!	#N/A	#N/A		#DIV/0!		4
																						#DIV/0!	#N/A	#N/A		#DIV/0!		4
																						#DIV/0!	#N/A	#N/A		#DIV/0!		4
																						#DIV/0!	#N/A	#N/A		#DIV/0!		4
																						#DIV/0!	#N/A	#N/A		#DIV/0!		4
																						#DIV/0!	#N/A	#N/A		#DIV/0!		4
																						#DIV/0!	#N/A	#N/A		#DIV/0!		4
																						#DIV/0!	#N/A	#N/A		#DIV/0!		4
																						#DIV/0!	#N/A	#N/A		#DIV/0!		4
																						#DIV/0!	#N/A	#N/A		#DIV/0!		4
																						#DIV/0!	#N/A	#N/A		#DIV/0!		4
																						#DIV/0!	#N/A	#N/A		#DIV/0!		4
																						#DIV/0!	#N/A	#N/A		#DIV/0!		4
																						#DIV/0!	#N/A	#N/A		#DIV/0!		4
																						#DIV/0!	#N/A	#N/A		#DIV/0!		4
																						#DIV/0!	#N/A	#N/A		#DIV/0!		4
																						#DIV/0!	#N/A	#N/A		#DIV/0!		4
																						#DIV/0!	#N/A	#N/A		#DIV/0!		4
																						#DIV/0!	#N/A	#N/A		#DIV/0!		4
																						#DIV/0!	#N/A	#N/A		#DIV/0!		4
																						#DIV/0!	#N/A	#N/A		#DIV/0!		4
																						#DIV/0!	#N/A	#N/A		#DIV/0!		4
																						#DIV/0!	#N/A	#N/A		#DIV/0!		4
																						#DIV/0!	#N/A	#N/A		#DIV/0!		4
																						#DIV/0!	#N/A	#N/A		#DIV/0!		4
																						#DIV/0!	#N/A	#N/A		#DIV/0!		4
																						#DIV/0!	#N/A	#N/A		#DIV/0!		4
																						#DIV/0!	#N/A	#N/A		#DIV/0!		4
																						#DIV/0!	#N/A	#N/A		#DIV/0!		4
																						#DIV/0!	#N/A	#N/A		#DIV/0!		4
																						#DIV/0!	#N/A	#N/A		#DIV/0!		4
																						#DIV/0!	#N/A	#N/A		#DIV/0!		4
																						#DIV/0!	#N/A	#N/A		#DIV/0!		4
																						#DIV/0!	#N/A	#N/A		#DIV/0!		4
																						#DIV/0!	#N/A	#N/A		#DIV/0!		4
																						#DIV/0!	#N/A	#N/A		#DIV/0!		4
																						#DIV/0!	#N/A	#N/A		#DIV/0!		4
																						#DIV/0!	#N/A	#N/A		#DIV/0!		4
																						#DIV/0!	#N/A	#N/A		#DIV/0!		4
																						#DIV/0!	#N/A	#N/A		#DIV/0!		4
																						#DIV/0!	#N/A	#N/A		#DIV/0!		4
																						#DIV/0!	#N/A	#N/A		#DIV/0!		4
																						#DIV/0!	#N/A	#N/A		#DIV/0!		4
																						#DIV/0!	#N/A	#N/A		#DIV/0!		4
																						#DIV/0!	#N/A	#N/A		#DIV/0!		4
																						#DIV/0!	#N/A	#N/A		#DIV/0!		4
[truncated: 54 more columns]

## Sheet: Modifier equation
																							Calculated values
		No Inhibitor	[I]1	[I]2	[I]3	[I]4	[I]5	[I]6	[I]7	[I]8	[I]9	[I]10	[I]11	[I]12	[I]13	[I]14	[I]15					Ki	No Inhibitor	[I]1	[I]2	[I]3	[I]4	[I]5	[I]6	[I]7	[I]8	[I]9	[I]10	[I]11	[I]12	[I]13	[I]14	[I]15
		0	1	2	3	4	5	0	0	0	0	0	0	0	0	0	0	K1	4.8281	V1	1.73945	11.7737	0	1	2	3	4	5	0	0	0	0	0	0	0	0	0	0
[S]1	2	0.51	0.505	0.502	0.499	0.496	0.493	0	0	0	0	0	0	0	0	0	0	K2	3.18478	V2	1.14695		0.509498	0.505435	0.501835	0.498625	0.495744	0.493144	#DIV/0!	#DIV/0!	#DIV/0!	#DIV/0!	#DIV/0!	#DIV/0!	#DIV/0!	#DIV/0!	#DIV/0!	#DIV/0!		0.509498	0.505435	0.501835	0.498625	0.495744	0.493144	0	0	0	0
[S]2	2.5	0.593	0.588	0.583	0.579	0.575	0.571	0	0	0	0	0	0	0	0	0	0						0.593419	0.587915	0.583053	0.578726	0.57485	0.571358	#DIV/0!	#DIV/0!	#DIV/0!	#DIV/0!	#DIV/0!	#DIV/0!	#DIV/0!	#DIV/0!	#DIV/0!	#DIV/0!		0.593419	0.587915	0.583053	0.578726	0.57485	0.571358	0	0	0	0
[S]3	3.33	0.71	0.702	0.695	0.689	0.683	0.679	0	0	0	0	0	0	0	0	0	0						0.710015	0.702154	0.695233	0.689091	0.683604	0.678674	#DIV/0!	#DIV/0!	#DIV/0!	#DIV/0!	#DIV/0!	#DIV/0!	#DIV/0!	#DIV/0!	#DIV/0!	#DIV/0!		0.710015	0.702154	0.695233	0.689091	0.683604	0.678674	0	0	0	0
[S]4	5	0.885	0.873	0.862	0.853	0.844	0.837	0	0	0	0	0	0	0	0	0	0						0.884938	0.872765	0.8621	0.852679	0.844298	0.836792	#DIV/0!	#DIV/0!	#DIV/0!	#DIV/0!	#DIV/0!	#DIV/0!	#DIV/0!	#DIV/0!	#DIV/0!	#DIV/0!		0.884938	0.872765	0.8621	0.852679	0.844298	0.836792	0	0	0	0
[S]5	0	0	0	0	0	0	0	0	0	0	0	0	0	0	0	0	0						#DIV/0!	#DIV/0!	#DIV/0!	#DIV/0!	#DIV/0!	#DIV/0!	#DIV/0!	#DIV/0!	#DIV/0!	#DIV/0!	#DIV/0!	#DIV/0!	#DIV/0!	#DIV/0!	#DIV/0!	#DIV/0!		0	0	0	0	0	0	0	0	0	0
[S]6	0	0	0	0	0	0	0	0	0	0	0	0	0	0	0	0	0			Sum R2	1.96754e-06		#DIV/0!	#DIV/0!	#DIV/0!	#DIV/0!	#DIV/0!	#DIV/0!	#DIV/0!	#DIV/0!	#DIV/0!	#DIV/0!	#DIV/0!	#DIV/0!	#DIV/0!	#DIV/0!	#DIV/0!	#DIV/0!		0	0	0	0	0	0	0	0	0	0
[S]7	0	0	0	0	0	0	0	0	0	0	0	0	0	0	0	0	0			Sum residuals %	0.00953944		#DIV/0!	#DIV/0!	#DIV/0!	#DIV/0!	#DIV/0!	#DIV/0!	#DIV/0!	#DIV/0!	#DIV/0!	#DIV/0!	#DIV/0!	#DIV/0!	#DIV/0!	#DIV/0!	#DIV/0!	#DIV/0!		0	0	0	0	0	0	0	0	0	0
[S]8	0	0	0	0	0	0	0	0	0	0	0	0	0	0	0	0	0						#DIV/0!	#DIV/0!	#DIV/0!	#DIV/0!	#DIV/0!	#DIV/0!	#DIV/0!	#DIV/0!	#DIV/0!	#DIV/0!	#DIV/0!	#DIV/0!	#DIV/0!	#DIV/0!	#DIV/0!	#DIV/0!		0	0	0	0	0	0	0	0	0	0
[S]9	0	0	0	0	0	0	0	0	0	0	0	0	0	0	0	0	0						#DIV/0!	#DIV/0!	#DIV/0!	#DIV/0!	#DIV/0!	#DIV/0!	#DIV/0!	#DIV/0!	#DIV/0!	#DIV/0!	#DIV/0!	#DIV/0!	#DIV/0!	#DIV/0!	#DIV/0!	#DIV/0!		0	0	0	0	0	0	0	0	0	0
[S]10	0	0	0	0	0	0	0	0	0	0	0	0	0	0	0	0	0						#DIV/0!	#DIV/0!	#DIV/0!	#DIV/0!	#DIV/0!	#DIV/0!	#DIV/0!	#DIV/0!	#DIV/0!	#DIV/0!	#DIV/0!	#DIV/0!	#DIV/0!	#DIV/0!	#DIV/0!	#DIV/0!		0	0	0	0	0	0	0	0	0	0
[S]11	0	0	0	0	0	0	0	0	0	0	0	0	0	0	0	0	0						#DIV/0!	#DIV/0!	#DIV/0!	#DIV/0!	#DIV/0!	#DIV/0!	#DIV/0!	#DIV/0!	#DIV/0!	#DIV/0!	#DIV/0!	#DIV/0!	#DIV/0!	#DIV/0!	#DIV/0!	#DIV/0!		0	0	0	0	0	0	0	0	0	0
[S]12	0	0	0	0	0	0	0	0	0	0	0	0	0	0	0	0	0						#DIV/0!	#DIV/0!	#DIV/0!	#DIV/0!	#DIV/0!	#DIV/0!	#DIV/0!	#DIV/0!	#DIV/0!	#DIV/0!	#DIV/0!	#DIV/0!	#DIV/0!	#DIV/0!	#DIV/0!	#DIV/0!		0	0	0	0	0	0	0	0	0	0
[S]13	0	0	0	0	0	0	0	0	0	0	0	0	0	0	0	0	0						#DIV/0!	#DIV/0!	#DIV/0!	#DIV/0!	#DIV/0!	#DIV/0!	#DIV/0!	#DIV/0!	#DIV/0!	#DIV/0!	#DIV/0!	#DIV/0!	#DIV/0!	#DIV/0!	#DIV/0!	#DIV/0!		0	0	0	0	0	0	0	0	0	0
[S]14	0	0	0	0	0	0	0	0	0	0	0	0	0	0	0	0	0						#DIV/0!	#DIV/0!	#DIV/0!	#DIV/0!	#DIV/0!	#DIV/0!	#DIV/0!	#DIV/0!	#DIV/0!	#DIV/0!	#DIV/0!	#DIV/0!	#DIV/0!	#DIV/0!	#DIV/0!	#DIV/0!		0	0	0	0	0	0	0	0	0	0
[S]15	0	0	0	0	0	0	0	0	0	0	0	0	0	0	0	0	0						#DIV/0!	#DIV/0!	#DIV/0!	#DIV/0!	#DIV/0!	#DIV/0!	#DIV/0!	#DIV/0!	#DIV/0!	#DIV/0!	#DIV/0!	#DIV/0!	#DIV/0!	#DIV/0!	#DIV/0!	#DIV/0!		0	0	0	0	0	0	0	0	0	0
	1	1	1	1	1	1	1	#DIV/0!	#DIV/0!	#DIV/0!	#DIV/0!	#DIV/0!	#DIV/0!	#DIV/0!	#DIV/0!	#DIV/0!	#DIV/0!																					2	2	0.509498	0.505435	0.501835	0.498625	0.495744	0.493144	#N/A	#N/A	#N/A	#N/A
	1	1	1	1	1	1	1	#DIV/0!	#DIV/0!	#DIV/0!	#DIV/0!	#DIV/0!	#DIV/0!	#DIV/0!	#DIV/0!	#DIV/0!	#DIV/0!					0.51	0.51	0.509498		-0.000501861	-0.000501861	5										2.5	2.5	0.593419	0.587915	0.583053	0.578726	0.57485	0.571358	#N/A	#N/A	#N/A	#N/A
	1	1	1	1	1	1	1	#DIV/0!	#DIV/0!	#DIV/0!	#DIV/0!	#DIV/0!	#DIV/0!	#DIV/0!	#DIV/0!	#DIV/0!	#DIV/0!					0.593	0.593	0.593419		0.000418551	0.000418551	5										3.33	3.33	0.710015	0.702154	0.695233	0.689091	0.683604	0.678674	#N/A	#N/A	#N/A	#N/A
	1	1	1	1	1	1	1	#DIV/0!	#DIV/0!	#DIV/0!	#DIV/0!	#DIV/0!	#DIV/0!	#DIV/0!	#DIV/0!	#DIV/0!	#DIV/0!					0.71	0.71	0.710015		1.53405e-05	1.53405e-05	5										5	5	0.884938	0.872765	0.8621	0.852679	0.844298	0.836792	#N/A	#N/A	#N/A	#N/A
	#DIV/0!	#DIV/0!	#DIV/0!	#DIV/0!	#DIV/0!	#DIV/0!	#DIV/0!	#DIV/0!	#DIV/0!	#DIV/0!	#DIV/0!	#DIV/0!	#DIV/0!	#DIV/0!	#DIV/0!	#DIV/0!	#DIV/0!					0.885	0.885	0.884938		-6.16847e-05	-6.16847e-05	5										#DIV/0!	#N/A	#N/A	#N/A	#N/A	#N/A	#N/A	#N/A	#N/A	#N/A	#N/A	#N/A
	#DIV/0!	#DIV/0!	#DIV/0!	#DIV/0!	#DIV/0!	#DIV/0!	#DIV/0!	#DIV/0!	#DIV/0!	#DIV/0!	#DIV/0!	#DIV/0!	#DIV/0!	#DIV/0!	#DIV/0!	#DIV/0!	#DIV/0!					#DIV/0!	#N/A	#N/A		#DIV/0!		5										#DIV/0!	#N/A	#N/A	#N/A	#N/A	#N/A	#N/A	#N/A	#N/A	#N/A	#N/A	#N/A
	#DIV/0!	#DIV/0!	#DIV/0!	#DIV/0!	#DIV/0!	#DIV/0!	#DIV/0!	#DIV/0!	#DIV/0!	#DIV/0!	#DIV/0!	#DIV/0!	#DIV/0!	#DIV/0!	#DIV/0!	#DIV/0!	#DIV/0!					#DIV/0!	#N/A	#N/A		#DIV/0!		5										#DIV/0!	#N/A	#N/A	#N/A	#N/A	#N/A	#N/A	#N/A	#N/A	#N/A	#N/A	#N/A
	#DIV/0!	#DIV/0!	#DIV/0!	#DIV/0!	#DIV/0!	#DIV/0!	#DIV/0!	#DIV/0!	#DIV/0!	#DIV/0!	#DIV/0!	#DIV/0!	#DIV/0!	#DIV/0!	#DIV/0!	#DIV/0!	#DIV/0!					#DIV/0!	#N/A	#N/A		#DIV/0!		5										#DIV/0!	#N/A	#N/A	#N/A	#N/A	#N/A	#N/A	#N/A	#N/A	#N/A	#N/A	#N/A
	#DIV/0!	#DIV/0!	#DIV/0!	#DIV/0!	#DIV/0!	#DIV/0!	#DIV/0!	#DIV/0!	#DIV/0!	#DIV/0!	#DIV/0!	#DIV/0!	#DIV/0!	#DIV/0!	#DIV/0!	#DIV/0!	#DIV/0!					#DIV/0!	#N/A	#N/A		#DIV/0!		5										#DIV/0!	#N/A	#N/A	#N/A	#N/A	#N/A	#N/A	#N/A	#N/A	#N/A	#N/A	#N/A
	#DIV/0!	#DIV/0!	#DIV/0!	#DIV/0!	#DIV/0!	#DIV/0!	#DIV/0!	#DIV/0!	#DIV/0!	#DIV/0!	#DIV/0!	#DIV/0!	#DIV/0!	#DIV/0!	#DIV/0!	#DIV/0!	#DIV/0!					#DIV/0!	#N/A	#N/A		#DIV/0!		5										#DIV/0!	#N/A	#N/A	#N/A	#N/A	#N/A	#N/A	#N/A	#N/A	#N/A	#N/A	#N/A
	#DIV/0!	#DIV/0!	#DIV/0!	#DIV/0!	#DIV/0!	#DIV/0!	#DIV/0!	#DIV/0!	#DIV/0!	#DIV/0!	#DIV/0!	#DIV/0!	#DIV/0!	#DIV/0!	#DIV/0!	#DIV/0!	#DIV/0!					#DIV/0!	#N/A	#N/A		#DIV/0!		5										#DIV/0!	#N/A	#N/A	#N/A	#N/A	#N/A	#N/A	#N/A	#N/A	#N/A	#N/A	#N/A
	#DIV/0!	#DIV/0!	#DIV/0!	#DIV/0!	#DIV/0!	#DIV/0!	#DIV/0!	#DIV/0!	#DIV/0!	#DIV/0!	#DIV/0!	#DIV/0!	#DIV/0!	#DIV/0!	#DIV/0!	#DIV/0!	#DIV/0!					#DIV/0!	#N/A	#N/A		#DIV/0!		5										#DIV/0!	#N/A	#N/A	#N/A	#N/A	#N/A	#N/A	#N/A	#N/A	#N/A	#N/A	#N/A
	#DIV/0!	#DIV/0!	#DIV/0!	#DIV/0!	#DIV/0!	#DIV/0!	#DIV/0!	#DIV/0!	#DIV/0!	#DIV/0!	#DIV/0!	#DIV/0!	#DIV/0!	#DIV/0!	#DIV/0!	#DIV/0!	#DIV/0!					#DIV/0!	#N/A	#N/A		#DIV/0!		5										#DIV/0!	#N/A	#N/A	#N/A	#N/A	#N/A	#N/A	#N/A	#N/A	#N/A	#N/A	#N/A
	#DIV/0!	#DIV/0!	#DIV/0!	#DIV/0!	#DIV/0!	#DIV/0!	#DIV/0!	#DIV/0!	#DIV/0!	#DIV/0!	#DIV/0!	#DIV/0!	#DIV/0!	#DIV/0!	#DIV/0!	#DIV/0!	#DIV/0!					#DIV/0!	#N/A	#N/A		#DIV/0!		5										#DIV/0!	#N/A	#N/A	#N/A	#N/A	#N/A	#N/A	#N/A	#N/A	#N/A	#N/A	#N/A
	#DIV/0!	#DIV/0!	#DIV/0!	#DIV/0!	#DIV/0!	#DIV/0!	#DIV/0!	#DIV/0!	#DIV/0!	#DIV/0!	#DIV/0!	#DIV/0!	#DIV/0!	#DIV/0!	#DIV/0!	#DIV/0!	#DIV/0!					#DIV/0!	#N/A	#N/A		#DIV/0!		5										#DIV/0!	#N/A	#N/A	#N/A	#N/A	#N/A	#N/A	#N/A	#N/A	#N/A	#N/A	#N/A
																						#DIV/0!	#N/A	#N/A		#DIV/0!		5
																						0.505	0.505	0.505435		0.000434646	0.000434646	5											0.5	1.96272	1.9785	1.99269	2.00551	2.01717	2.02781	#N/A	#N/A	#N/A	#N/A
																						0.588	0.588	0.587915		-8.45508e-05	-8.45508e-05	5											0.4	1.68515	1.70092	1.71511	1.72793	1.73959	1.75022	#N/A	#N/A	#N/A	#N/A
																						0.702	0.702	0.702154		0.000154444	0.000154444	5											0.3003	1.40842	1.42419	1.43837	1.45119	1.46283	1.47346	#N/A	#N/A	#N/A	#N/A
																						0.873	0.873	0.872765		-0.00023534	-0.00023534	5											0.2	1.13002	1.14578	1.15996	1.17277	1.18442	1.19504	#N/A	#N/A	#N/A	#N/A
																						#DIV/0!	#N/A	#N/A		#DIV/0!		5											#N/A	#N/A	#N/A	#N/A	#N/A	#N/A	#N/A	#N/A	#N/A	#N/A	#N/A
																						#DIV/0!	#N/A	#N/A		#DIV/0!		5											#N/A	#N/A	#N/A	#N/A	#N/A	#N/A	#N/A	#N/A	#N/A	#N/A	#N/A
																						#DIV/0!	#N/A	#N/A		#DIV/0!		5											#N/A	#N/A	#N/A	#N/A	#N/A	#N/A	#N/A	#N/A	#N/A	#N/A	#N/A
																						#DIV/0!	#N/A	#N/A		#DIV/0!		5											#N/A	#N/A	#N/A	#N/A	#N/A	#N/A	#N/A	#N/A	#N/A	#N/A	#N/A
																						#DIV/0!	#N/A	#N/A		#DIV/0!		5											#N/A	#N/A	#N/A	#N/A	#N/A	#N/A	#N/A	#N/A	#N/A	#N/A	#N/A
																						#DIV/0!	#N/A	#N/A		#DIV/0!		5											#N/A	#N/A	#N/A	#N/A	#N/A	#N/A	#N/A	#N/A	#N/A	#N/A	#N/A
																						#DIV/0!	#N/A	#N/A		#DIV/0!		5											#N/A	#N/A	#N/A	#N/A	#N/A	#N/A	#N/A	#N/A	#N/A	#N/A	#N/A
																						#DIV/0!	#N/A	#N/A		#DIV/0!		5											#N/A	#N/A	#N/A	#N/A	#N/A	#N/A	#N/A	#N/A	#N/A	#N/A	#N/A
																						#DIV/0!	#N/A	#N/A		#DIV/0!		5											#N/A	#N/A	#N/A	#N/A	#N/A	#N/A	#N/A	#N/A	#N/A	#N/A	#N/A
																						#DIV/0!	#N/A	#N/A		#DIV/0!		5											#N/A	#N/A	#N/A	#N/A	#N/A	#N/A	#N/A	#N/A	#N/A	#N/A	#N/A
																						#DIV/0!	#N/A	#N/A		#DIV/0!		5											#N/A	#N/A	#N/A	#N/A	#N/A	#N/A	#N/A	#N/A	#N/A	#N/A	#N/A
																						0.502	0.502	0.501835		-0.000164589	-0.000164589	5
																						0.583	0.583	0.583053		5.30942e-05	5.30942e-05	5												0.51	0.505	0.502	0.499	0.496	0.493	#DIV/0!	#DIV/0!	#DIV/0!	#DIV/0!
																						0.695	0.695	0.695233		0.000232524	0.000232524	5												0.593	0.588	0.583	0.579	0.575	0.571	#DIV/0!	#DIV/0!	#DIV/0!	#DIV/0!
																						0.862	0.862	0.8621		9.97395e-05	9.97395e-05	5												0.71	0.702	0.695	0.689	0.683	0.679	#DIV/0!	#DIV/0!	#DIV/0!	#DIV/0!
																						#DIV/0!	#N/A	#N/A		#DIV/0!		5												0.885	0.873	0.862	0.853	0.844	0.837	#DIV/0!	#DIV/0!	#DIV/0!	#DIV/0!
																						#DIV/0!	#N/A	#N/A		#DIV/0!		5												#DIV/0!	#DIV/0!	#DIV/0!	#DIV/0!	#DIV/0!	#DIV/0!	#DIV/0!	#DIV/0!	#DIV/0!	#DIV/0!
																						#DIV/0!	#N/A	#N/A		#DIV/0!		5												#DIV/0!	#DIV/0!	#DIV/0!	#DIV/0!	#DIV/0!	#DIV/0!	#DIV/0!	#DIV/0!	#DIV/0!	#DIV/0!
																						#DIV/0!	#N/A	#N/A		#DIV/0!		5												#DIV/0!	#DIV/0!	#DIV/0!	#DIV/0!	#DIV/0!	#DIV/0!	#DIV/0!	#DIV/0!	#DIV/0!	#DIV/0!
																						#DIV/0!	#N/A	#N/A		#DIV/0!		5												#DIV/0!	#DIV/0!	#DIV/0!	#DIV/0!	#DIV/0!	#DIV/0!	#DIV/0!	#DIV/0!	#DIV/0!	#DIV/0!
																						#DIV/0!	#N/A	#N/A		#DIV/0!		5												#DIV/0!	#DIV/0!	#DIV/0!	#DIV/0!	#DIV/0!	#DIV/0!	#DIV/0!	#DIV/0!	#DIV/0!	#DIV/0!
																						#DIV/0!	#N/A	#N/A		#DIV/0!		5												#DIV/0!	#DIV/0!	#DIV/0!	#DIV/0!	#DIV/0!	#DIV/0!	#DIV/0!	#DIV/0!	#DIV/0!	#DIV/0!
																						#DIV/0!	#N/A	#N/A		#DIV/0!		5												#DIV/0!	#DIV/0!	#DIV/0!	#DIV/0!	#DIV/0!	#DIV/0!	#DIV/0!	#DIV/0!	#DIV/0!	#DIV/0!
																						#DIV/0!	#N/A	#N/A		#DIV/0!		5												#DIV/0!	#DIV/0!	#DIV/0!	#DIV/0!	#DIV/0!	#DIV/0!	#DIV/0!	#DIV/0!	#DIV/0!	#DIV/0!
																						#DIV/0!	#N/A	#N/A		#DIV/0!		5												#DIV/0!	#DIV/0!	#DIV/0!	#DIV/0!	#DIV/0!	#DIV/0!	#DIV/0!	#DIV/0!	#DIV/0!	#DIV/0!
																						#DIV/0!	#N/A	#N/A		#DIV/0!		5												#DIV/0!	#DIV/0!	#DIV/0!	#DIV/0!	#DIV/0!	#DIV/0!	#DIV/0!	#DIV/0!	#DIV/0!	#DIV/0!
																						0.499	0.499	0.498625		-0.000374831	-0.000374831	5												#DIV/0!	#DIV/0!	#DIV/0!	#DIV/0!	#DIV/0!	#DIV/0!	#DIV/0!	#DIV/0!	#DIV/0!	#DIV/0!
																						0.579	0.579	0.578726		-0.000274264	-0.000274264	5
																						0.689	0.689	0.689091		9.08226e-05	9.08226e-05	5												1/s	0	1	2	3	4	5	0	0	0
																						0.853	0.853	0.852679		-0.000320557	-0.000320557	5											1	0.5	1.96272	1.9785	1.99269	2.00551	2.01717	2.02781	#N/A	#N/A	#N/A
																						#DIV/0!	#N/A	#N/A		#DIV/0!		5											2	0.4	1.68515	1.70092	1.71511	1.72793	1.73959	1.75022	#N/A	#N/A	#N/A
																						#DIV/0!	#N/A	#N/A		#DIV/0!		5											3	0.3003	1.40842	1.42419	1.43837	1.45119	1.46283	1.47346	#N/A	#N/A	#N/A
																						#DIV/0!	#N/A	#N/A		#DIV/0!		5											4	0.2	1.13002	1.14578	1.15996	1.17277	1.18442	1.19504	#N/A	#N/A	#N/A
																						#DIV/0!	#N/A	#N/A		#DIV/0!		5											5	#N/A	#N/A	#N/A	#N/A	#N/A	#N/A	#N/A	#N/A	#N/A	#N/A
																						#DIV/0!	#N/A	#N/A		#DIV/0!		5											6	#N/A	#N/A	#N/A	#N/A	#N/A	#N/A	#N/A	#N/A	#N/A	#N/A
																						#DIV/0!	#N/A	#N/A		#DIV/0!		5											7	#N/A	#N/A	#N/A	#N/A	#N/A	#N/A	#N/A	#N/A	#N/A	#N/A
																						#DIV/0!	#N/A	#N/A		#DIV/0!		5											8	#N/A	#N/A	#N/A	#N/A	#N/A	#N/A	#N/A	#N/A	#N/A	#N/A
																						#DIV/0!	#N/A	#N/A		#DIV/0!		5											9	#N/A	#N/A	#N/A	#N/A	#N/A	#N/A	#N/A	#N/A	#N/A	#N/A
																						#DIV/0!	#N/A	#N/A		#DIV/0!		5											10	#N/A	#N/A	#N/A	#N/A	#N/A	#N/A	#N/A	#N/A	#N/A	#N/A
																						#DIV/0!	#N/A	#N/A		#DIV/0!		5											11	#N/A	#N/A	#N/A	#N/A	#N/A	#N/A	#N/A	#N/A	#N/A	#N/A
																						#DIV/0!	#N/A	#N/A		#DIV/0!		5											12	#N/A	#N/A	#N/A	#N/A	#N/A	#N/A	#N/A	#N/A	#N/A	#N/A
																						0.496	0.496	0.495744		-0.000255908	-0.000255908	5											13	#N/A	#N/A	#N/A	#N/A	#N/A	#N/A	#N/A	#N/A	#N/A	#N/A
																						0.575	0.575	0.57485		-0.000150319	-0.000150319	5											14	#N/A	#N/A	#N/A	#N/A	#N/A	#N/A	#N/A	#N/A	#N/A	#N/A
																						0.683	0.683	0.683604		0.000604462	0.000604462	5											15	#N/A	#N/A	#N/A	#N/A	#N/A	#N/A	#N/A	#N/A	#N/A	#N/A
																						0.844	0.844	0.844298		0.000297908	0.000297908	5
																						#DIV/0!	#N/A	#N/A		#DIV/0!		5
																						#DIV/0!	#N/A	#N/A		#DIV/0!		5
																						#DIV/0!	#N/A	#N/A		#DIV/0!		5
																						#DIV/0!	#N/A	#N/A		#DIV/0!		5
																						#DIV/0!	#N/A	#N/A		#DIV/0!		5
																						#DIV/0!	#N/A	#N/A		#DIV/0!		5
																						#DIV/0!	#N/A	#N/A		#DIV/0!		5
																						#DIV/0!	#N/A	#N/A		#DIV/0!		5
																						#DIV/0!	#N/A	#N/A		#DIV/0!		5
																						#DIV/0!	#N/A	#N/A		#DIV/0!		5
																						#DIV/0!	#N/A	#N/A		#DIV/0!		5
																						0.493	0.493	0.493144		0.000144022	0.000144022	5
																						0.571	0.571	0.571358		0.000357828	0.000357828	5
																						0.679	0.679	0.678674		-0.000326135	-0.000326135	5
																						0.837	0.837	0.836792		-0.000207703	-0.000207703	5
																						#DIV/0!	#N/A	#N/A		#DIV/0!		5
																						#DIV/0!	#N/A	#N/A		#DIV/0!		5
																						#DIV/0!	#N/A	#N/A		#DIV/0!		5
																						#DIV/0!	#N/A	#N/A		#DIV/0!		5
																						#DIV/0!	#N/A	#N/A		#DIV/0!		5
																						#DIV/0!	#N/A	#N/A		#DIV/0!		5
																						#DIV/0!	#N/A	#N/A		#DIV/0!		5
																						#DIV/0!	#N/A	#N/A		#DIV/0!		5
																						#DIV/0!	#N/A	#N/A		#DIV/0!		5
																						#DIV/0!	#N/A	#N/A		#DIV/0!		5
																						#DIV/0!	#N/A	#N/A		#DIV/0!		5
																						#DIV/0!	#N/A	#N/A		#DIV/0!		5
																						#DIV/0!	#N/A	#N/A		#DIV/0!		5
																						#DIV/0!	#N/A	#N/A		#DIV/0!		5
																						#DIV/0!	#N/A	#N/A		#DIV/0!		5
																						#DIV/0!	#N/A	#N/A		#DIV/0!		5
																						#DIV/0!	#N/A	#N/A		#DIV/0!		5
																						#DIV/0!	#N/A	#N/A		#DIV/0!		5
																						#DIV/0!	#N/A	#N/A		#DIV/0!		5
																						#DIV/0!	#N/A	#N/A		#DIV/0!		5
																						#DIV/0!	#N/A	#N/A		#DIV/0!		5
																						#DIV/0!	#N/A	#N/A		#DIV/0!		5
																						#DIV/0!	#N/A	#N/A		#DIV/0!		5
																						#DIV/0!	#N/A	#N/A		#DIV/0!		5
																						#DIV/0!	#N/A	#N/A		#DIV/0!		5
																						#DIV/0!	#N/A	#N/A		#DIV/0!		5
																						#DIV/0!	#N/A	#N/A		#DIV/0!		5
																						#DIV/0!	#N/A	#N/A		#DIV/0!		5
																						#DIV/0!	#N/A	#N/A		#DIV/0!		5
																						#DIV/0!	#N/A	#N/A		#DIV/0!		5
																						#DIV/0!	#N/A	#N/A		#DIV/0!		5
																						#DIV/0!	#N/A	#N/A		#DIV/0!		5
																						#DIV/0!	#N/A	#N/A		#DIV/0!		5
																						#DIV/0!	#N/A	#N/A		#DIV/0!		5
																						#DIV/0!	#N/A	#N/A		#DIV/0!		5
																						#DIV/0!	#N/A	#N/A		#DIV/0!		5
																						#DIV/0!	#N/A	#N/A		#DIV/0!		5
																						#DIV/0!	#N/A	#N/A		#DIV/0!		5
																						#DIV/0!	#N/A	#N/A		#DIV/0!		5
																						#DIV/0!	#N/A	#N/A		#DIV/0!		5
																						#DIV/0!	#N/A	#N/A		#DIV/0!		5
																						#DIV/0!	#N/A	#N/A		#DIV/0!		5
																						#DIV/0!	#N/A	#N/A		#DIV/0!		5
																						#DIV/0!	#N/A	#N/A		#DIV/0!		5
																						#DIV/0!	#N/A	#N/A		#DIV/0!		5
																						#DIV/0!	#N/A	#N/A		#DIV/0!		5
																						#DIV/0!	#N/A	#N/A		#DIV/0!		5
																						#DIV/0!	#N/A	#N/A		#DIV/0!		5
																						#DIV/0!	#N/A	#N/A		#DIV/0!		5
																						#DIV/0!	#N/A	#N/A		#DIV/0!		5
																						#DIV/0!	#N/A	#N/A		#DIV/0!		5
																						#DIV/0!	#N/A	#N/A		#DIV/0!		5
																						#DIV/0!	#N/A	#N/A		#DIV/0!		5
																						#DIV/0!	#N/A	#N/A		#DIV/0!		5
																						#DIV/0!	#N/A	#N/A		#DIV/0!		5
																						#DIV/0!	#N/A	#N/A		#DIV/0!		5
																						#DIV/0!	#N/A	#N/A		#DIV/0!		5
																						#DIV/0!	#N/A	#N/A		#DIV/0!		5
																						#DIV/0!	#N/A	#N/A		#DIV/0!		5
																						#DIV/0!	#N/A	#N/A		#DIV/0!		5
																						#DIV/0!	#N/A	#N/A		#DIV/0!		5
																						#DIV/0!	#N/A	#N/A		#DIV/0!		5
																						#DIV/0!	#N/A	#N/A		#DIV/0!		5
																						#DIV/0!	#N/A	#N/A		#DIV/0!		5
																						#DIV/0!	#N/A	#N/A		#DIV/0!		5
																						#DIV/0!	#N/A	#N/A		#DIV/0!		5
																						#DIV/0!	#N/A	#N/A		#DIV/0!		5
																						#DIV/0!	#N/A	#N/A		#DIV/0!		5
																						#DIV/0!	#N/A	#N/A		#DIV/0!		5
																						#DIV/0!	#N/A	#N/A		#DIV/0!		5
																						#DIV/0!	#N/A	#N/A		#DIV/0!		5
																						#DIV/0!	#N/A	#N/A		#DIV/0!		5
																						#DIV/0!	#N/A	#N/A		#DIV/0!		5
																						#DIV/0!	#N/A	#N/A		#DIV/0!		5
																						#DIV/0!	#N/A	#N/A		#DIV/0!		5
																						#DIV/0!	#N/A	#N/A		#DIV/0!		5
																						#DIV/0!	#N/A	#N/A		#DIV/0!		5
																						#DIV/0!	#N/A	#N/A		#DIV/0!		5
																						#DIV/0!	#N/A	#N/A		#DIV/0!		5
																						#DIV/0!	#N/A	#N/A		#DIV/0!		5
																						#DIV/0!	#N/A	#N/A		#DIV/0!		5
																						#DIV/0!	#N/A	#N/A		#DIV/0!		5
																						#DIV/0!	#N/A	#N/A		#DIV/0!		5
																						#DIV/0!	#N/A	#N/A		#DIV/0!		5
																						#DIV/0!	#N/A	#N/A		#DIV/0!		5
																						#DIV/0!	#N/A	#N/A		#DIV/0!		5
																						#DIV/0!	#N/A	#N/A		#DIV/0!		5
																						#DIV/0!	#N/A	#N/A		#DIV/0!		5
																						#DIV/0!	#N/A	#N/A		#DIV/0!		5
																						#DIV/0!	#N/A	#N/A		#DIV/0!		5
																						#DIV/0!	#N/A	#N/A		#DIV/0!		5
																						#DIV/0!	#N/A	#N/A		#DIV/0!		5
																						#DIV/0!	#N/A	#N/A		#DIV/0!		5
																						#DIV/0!	#N/A	#N/A		#DIV/0!		5
																						#DIV/0!	#N/A	#N/A		#DIV/0!		5
																						#DIV/0!	#N/A	#N/A		#DIV/0!		5
																						#DIV/0!	#N/A	#N/A		#DIV/0!		5
																						#DIV/0!	#N/A	#N/A		#DIV/0!		5
																						#DIV/0!	#N/A	#N/A		#DIV/0!		5
																						#DIV/0!	#N/A	#N/A		#DIV/0!		5
																						#DIV/0!	#N/A	#N/A		#DIV/0!		5
																						#DIV/0!	#N/A	#N/A		#DIV/0!		5
																						#DIV/0!	#N/A	#N/A		#DIV/0!		5
																						#DIV/0!	#N/A	#N/A		#DIV/0!		5
																						#DIV/0!	#N/A	#N/A		#DIV/0!		5
																						#DIV/0!	#N/A	#N/A		#DIV/0!		5
																						#DIV/0!	#N/A	#N/A		#DIV/0!		5
																						#DIV/0!	#N/A	#N/A		#DIV/0!		5
																						#DIV/0!	#N/A	#N/A		#DIV/0!		5
																						#DIV/0!	#N/A	#N/A		#DIV/0!		5
																						#DIV/0!	#N/A	#N/A		#DIV/0!		5
																						#DIV/0!	#N/A	#N/A		#DIV/0!		5
																						#DIV/0!	#N/A	#N/A		#DIV/0!		5
																						#DIV/0!	#N/A	#N/A		#DIV/0!		5
																						#DIV/0!	#N/A	#N/A		#DIV/0!		5
																						#DIV/0!	#N/A	#N/A		#DIV/0!		5
																						#DIV/0!	#N/A	#N/A		#DIV/0!		5
																						#DIV/0!	#N/A	#N/A		#DIV/0!		5
																						#DIV/0!	#N/A	#N/A		#DIV/0!		5
																						#DIV/0!	#N/A	#N/A		#DIV/0!		5
																						#DIV/0!	#N/A	#N/A		#DIV/0!		5
																						#DIV/0!	#N/A	#N/A		#DIV/0!		5
																						#DIV/0!	#N/A	#N/A		#DIV/0!		5
																						#DIV/0!	#N/A	#N/A		#DIV/0!		5
																						#DIV/0!	#N/A	#N/A		#DIV/0!		5
																						#DIV/0!	#N/A	#N/A		#DIV/0!		5
																						#DIV/0!	#N/A	#N/A		#DIV/0!		5
																						#DIV/0!	#N/A	#N/A		#DIV/0!		5
																						#DIV/0!	#N/A	#N/A		#DIV/0!		5
																						#DIV/0!	#N/A	#N/A		#DIV/0!		5
																						#DIV/0!	#N/A	#N/A		#DIV/0!		5
																						#DIV/0!	#N/A	#N/A		#DIV/0!		5
																						#DIV/0!	#N/A	#N/A		#DIV/0!		5
																						#DIV/0!	#N/A	#N/A		#DIV/0!		5
																						#DIV/0!	#N/A	#N/A		#DIV/0!		5
																						#DIV/0!	#N/A	#N/A		#DIV/0!		5
																						#DIV/0!	#N/A	#N/A		#DIV/0!		5
																						#DIV/0!	#N/A	#N/A		#DIV/0!		5
																						#DIV/0!	#N/A	#N/A		#DIV/0!		5
																						#DIV/0!	#N/A	#N/A		#DIV/0!		5
																						#DIV/0!	#N/A	#N/A		#DIV/0!		5
																						#DIV/0!	#N/A	#N/A		#DIV/0!		5
																						#DIV/0!	#N/A	#N/A		#DIV/0!		5
																						#DIV/0!	#N/A	#N/A		#DIV/0!		5
																						#DIV/0!	#N/A	#N/A		#DIV/0!		5
																						#DIV/0!	#N/A	#N/A		#DIV/0!		5
																						#DIV/0!	#N/A	#N/A		#DIV/0!		5
																						#DIV/0!	#N/A	#N/A		#DIV/0!		5
																						#DIV/0!	#N/A	#N/A		#DIV/0!		5
																						#DIV/0!	#N/A	#N/A		#DIV/0!		5
																						#DIV/0!	#N/A	#N/A		#DIV/0!		5
																						#DIV/0!	#N/A	#N/A		#DIV/0!		5
																						#DIV/0!	#N/A	#N/A		#DIV/0!		5
																						#DIV/0!	#N/A	#N/A		#DIV/0!		5
																						#DIV/0!	#N/A	#N/A		#DIV/0!		5
																						#DIV/0!	#N/A	#N/A		#DIV/0!		5
																						#DIV/0!	#N/A	#N/A		#DIV/0!		5
																						#DIV/0!	#N/A	#N/A		#DIV/0!		5
																						#DIV/0!	#N/A	#N/A		#DIV/0!		5
																						#DIV/0!	#N/A	#N/A		#DIV/0!		5
																						#DIV/0!	#N/A	#N/A		#DIV/0!		5
[truncated: 54 more columns]
