# Supplementary material for: Comparing enzyme activity modifier equations through the development of global data fitting templates in Excel
Source: PeerJ. 2018 Dec 14;6:e6082. doi: 10.7717/peerj.6082 (PMC6296338; doi:10.7717/peerj.6082)
Supplement: Supplemental Information 18 [file peerj-06-6082-s018.xlsx]

## Sheet: Raw data and fitting summary
		No Inhibitor	[I]1	[I]2	[I]3	[I]4	[I]5	[I]6	[I]7	[I]8	[I]9	[I]10	[I]11	[I]12	[I]13	[I]14	[I]15
			0.05	0.1	0.15
[S]1	1.25	0.661201	0.490798	0.426403	0.338983
[S]2	0.625	0.572607	0.408998	0.329696	0.198299
[S]3	0.25	0.3747	0.294898	0.1924	0.129799
[S]4	0.125	0.258498	0.1753	0.1027	0.0742997
[S]5	0.0625	0.159701	0.0931003	0.0560356	0.0344828
[S]6
[S]7
[S]8
[S]9
[S]10
[S]11
[S]12
[S]13
[S]14
[S]15
		Direct linear plot Km, Vmax estimates
							0.217766	1.25	0.663613	1	1	1.25	0.663613	1.25	0.663613
		Km	0.249112				0.135882	0.625	0.569052	1	1	0.625	0.569052	0.625	0.569052
		Vmax	0.795864					0.25	0.39864	1	1	0.25	0.39864	0.25	0.39864
								0.125	0.265918	1	1	0.125	0.265918	0.125	0.265918
	Ki estimate based on linear decrease in activity							0.0625	0.159626	1	1	0.0625	0.159626	0.0625	0.159626
								0	0	#DIV/0!	#DIV/0!	#DIV/0!	#DIV/0!	#N/A	#N/A
		Ki	0.217766					0	0	#DIV/0!	#DIV/0!	#DIV/0!	#DIV/0!	#N/A	#N/A
								0	0	#DIV/0!	#DIV/0!	#DIV/0!	#DIV/0!	#N/A	#N/A
								0	0	#DIV/0!	#DIV/0!	#DIV/0!	#DIV/0!	#N/A	#N/A
								0	0	#DIV/0!	#DIV/0!	#DIV/0!	#DIV/0!	#N/A	#N/A
								0	0	#DIV/0!	#DIV/0!	#DIV/0!	#DIV/0!	#N/A	#N/A
								0	0	#DIV/0!	#DIV/0!	#DIV/0!	#DIV/0!	#N/A	#N/A
								0	0	#DIV/0!	#DIV/0!	#DIV/0!	#DIV/0!	#N/A	#N/A
								0	0	#DIV/0!	#DIV/0!	#DIV/0!	#DIV/0!	#N/A	#N/A
								0	0	#DIV/0!	#DIV/0!	#DIV/0!	#DIV/0!	#N/A	#N/A
			Km	Km2	Vmax	Vmax2	Ki	b	RSS	RSE	n	k	BIC
		Partial Non-competitive	0.346845		0.883555	0	0.123342		0.0138614	0.0294336	20	4	-57.9803
		Partial Competitive	0.252966	1.10033	0.154148		0.0547987		0.00763113	0.0218391	20	4	-63.1647
		Partial Uncompetitive	0.417931		0.723451	0	0.898385		0.159754	0.0999232	20	4	-36.7474
		Partial Mixed Non-competitive	0.256522	1.18315	0.799944		0.251385	0	0.00756846	0.0224625	20	5	-61.9353
		Modifier equation	0.256522	1.18315	0.799944	0	0.251385		0.00756846	0.0224625	20	5	-61.9353
													Residual distribution
													Partial Non-competitive	Partial Competitive	Partial Uncompetitive	Partial Mixed Non-competitive	Modifier equation
												Minimum value	-0.04444	-0.0402456	-0.166583	-0.0422542	-0.0422542
												First quartile	-0.0180269	-0.00522107	-0.0468918	-0.00629445	-0.00629445
												Median value	-0.00152261	0.00191214	0.0172012	0.000775338	0.000775338
					Partial Non-competitive	Partial Competitive	Partial Uncompetitive	Partial Mixed Non-competitive	Modifier equation			Third quartile	0.0264346	0.0112615	0.0565923	0.0116073	0.0116073
				Q1	-0.0180269	-0.00522107	-0.0468918	-0.00629445	-0.00629445			Maximum value	0.0581031	0.0565918	0.172937	0.0567292	0.0567292
				Min	-0.04444	-0.0402456	-0.166583	-0.0422542	-0.0422542
				Median	-0.00152261	0.00191214	0.0172012	0.000775338	0.000775338
				Max	0.0581031	0.0565918	0.172937	0.0567292	0.0567292
				Q3	0.0264346	0.0112615	0.0565923	0.0116073	0.0116073
	Partial Non-competitive
	Km	0.346845
	Vmax	0.883555
	bVmax	0
	Ki	0.123342
	RSS	0.0138614
	Partial Competitive
	Km	0.252966
	Km2	1.10033
	Vmax	0.154148
	Ki	0.0547987
	RSS	0.00763113
	Partial Uncompetitive
	Km	0.417931
	Vmax	0.723451
	Vmax2	0
	Ki	0.898385
	RSS	0.159754
	Partial Mixed Non-competitive
	Km	0.256522
	Km2	1.18315
	Vmax	0.799944
	Ki	0.251385
	b	0
	RSS	0.00756846
	Modifier equation
	Km	0.256522
	Km2	1.18315
	Vmax	0.799944
	Vmax2	0
	Kx	0.251385
	RSS	0.00756846

## Sheet: modified direct linear plot
Km/Vmax direct plot
									Intercept points x-axis																				Intercept points x-axis
										Line 1	Line 2	Line 3	Line 4	Line 5	Line 6	Line 7	Line 8	Line 9	Line 10	Line 11	Line 12	Line 13	Line 14	Line 15						Line 1	Line 2	Line 3	Line 4	Line 5	Line 6	Line 7	Line 8	Line 9	Line 10	Line 11	Line 12	Line 13	Line 14	Line 15
			x-intercept	y-interecept					Line 1																				Line 1
[Substrate]		v	[Substrate]/v	1/v					Line 2	0.2925																			Line 2	0.2925
1.25		0.661201	1.8905	1.5124					Line 3	0.361375	0.384333																		Line 3	0.361375	0.384333
0.625		0.572607	1.0915	1.7464					Line 4	0.327236	0.331578	0.299925																	Line 4	0.327236	0.331578	0.299925
0.25		0.3747	0.6672	2.6688					Line 5	0.312454	0.313562	0.299408	0.29915																Line 5	0.312454	0.313562	0.299408	0.29915
0.125		0.258498	0.483563	3.8685					Line 6	#DIV/0!	#DIV/0!	#DIV/0!	#DIV/0!	#DIV/0!															Line 6
0.0625		0.159701	0.391356	6.2617					Line 7	#DIV/0!	#DIV/0!	#DIV/0!	#DIV/0!	#DIV/0!	#DIV/0!														Line 7
0		0	#DIV/0!	#DIV/0!					Line 8	#DIV/0!	#DIV/0!	#DIV/0!	#DIV/0!	#DIV/0!	#DIV/0!	#DIV/0!													Line 8
0		0	#DIV/0!	#DIV/0!					Line 9	#DIV/0!	#DIV/0!	#DIV/0!	#DIV/0!	#DIV/0!	#DIV/0!	#DIV/0!	#DIV/0!												Line 9
0		0	#DIV/0!	#DIV/0!					Line 10	#DIV/0!	#DIV/0!	#DIV/0!	#DIV/0!	#DIV/0!	#DIV/0!	#DIV/0!	#DIV/0!	#DIV/0!											Line 10
0		0	#DIV/0!	#DIV/0!					Line 11	#DIV/0!	#DIV/0!	#DIV/0!	#DIV/0!	#DIV/0!	#DIV/0!	#DIV/0!	#DIV/0!	#DIV/0!	#DIV/0!										Line 11
0		0	#DIV/0!	#DIV/0!					Line 12	#DIV/0!	#DIV/0!	#DIV/0!	#DIV/0!	#DIV/0!	#DIV/0!	#DIV/0!	#DIV/0!	#DIV/0!	#DIV/0!	#DIV/0!									Line 12
0		0	#DIV/0!	#DIV/0!					Line 13	#DIV/0!	#DIV/0!	#DIV/0!	#DIV/0!	#DIV/0!	#DIV/0!	#DIV/0!	#DIV/0!	#DIV/0!	#DIV/0!	#DIV/0!	#DIV/0!								Line 13
0		0	#DIV/0!	#DIV/0!					Line 14	#DIV/0!	#DIV/0!	#DIV/0!	#DIV/0!	#DIV/0!	#DIV/0!	#DIV/0!	#DIV/0!	#DIV/0!	#DIV/0!	#DIV/0!	#DIV/0!	#DIV/0!							Line 14
0		0	#DIV/0!	#DIV/0!					Line 15	#DIV/0!	#DIV/0!	#DIV/0!	#DIV/0!	#DIV/0!	#DIV/0!	#DIV/0!	#DIV/0!	#DIV/0!	#DIV/0!	#DIV/0!	#DIV/0!	#DIV/0!	#DIV/0!						Line 15
0		0	#DIV/0!	#DIV/0!
0		0	#DIV/0!	#DIV/0!
																														Km/Vmax (x-axis):	0.313008		Km:	0.249112
																														Standard dev:	0.0300132
Line 1	x	y
	0	1.5124		Slope:	-0.8
	1.8905	0		y-intercept:	1.5124				1/Intercept points y-axis																				1/Intercept points y-axis
										Line 1	Line 2	Line 3	Line 4	Line 5	Line 6	Line 7	Line 8	Line 9	Line 10	Line 11	Line 12	Line 13	Line 14	Line 15						Line 1	Line 2	Line 3	Line 4	Line 5	Line 6	Line 7	Line 8	Line 9	Line 10	Line 11	Line 12	Line 13	Line 14	Line 15
Line 2	x	y							Line 1																				Line 1
	0	1.7464		Slope:	-1.6				Line 2	0.782228																			Line 2	0.782228
	1.0915	0		y-intercept:	1.7464				Line 3	0.817461	0.883809																		Line 3	0.817461	0.883809
									Line 4	0.799609	0.822453	0.680689																	Line 4	0.799609	0.822453	0.680689
Line 3	x	y							Line 5	0.792119	0.803406	0.679733	0.677828																Line 5	0.792119	0.803406	0.679733	0.677828
	0	2.6688		Slope:	-4				Line 6	#DIV/0!	#DIV/0!	#DIV/0!	#DIV/0!	#DIV/0!															Line 6
	0.6672	0		y-intercept:	2.6688				Line 7	#DIV/0!	#DIV/0!	#DIV/0!	#DIV/0!	#DIV/0!	#DIV/0!														Line 7
									Line 8	#DIV/0!	#DIV/0!	#DIV/0!	#DIV/0!	#DIV/0!	#DIV/0!	#DIV/0!													Line 8
Line 4	x	y							Line 9	#DIV/0!	#DIV/0!	#DIV/0!	#DIV/0!	#DIV/0!	#DIV/0!	#DIV/0!	#DIV/0!												Line 9
	0	3.8685		Slope:	-8				Line 10	#DIV/0!	#DIV/0!	#DIV/0!	#DIV/0!	#DIV/0!	#DIV/0!	#DIV/0!	#DIV/0!	#DIV/0!											Line 10
	0.483563	0		y-intercept:	3.8685				Line 11	#DIV/0!	#DIV/0!	#DIV/0!	#DIV/0!	#DIV/0!	#DIV/0!	#DIV/0!	#DIV/0!	#DIV/0!	#DIV/0!										Line 11
									Line 12	#DIV/0!	#DIV/0!	#DIV/0!	#DIV/0!	#DIV/0!	#DIV/0!	#DIV/0!	#DIV/0!	#DIV/0!	#DIV/0!	#DIV/0!									Line 12
Line 5	x	y							Line 13	#DIV/0!	#DIV/0!	#DIV/0!	#DIV/0!	#DIV/0!	#DIV/0!	#DIV/0!	#DIV/0!	#DIV/0!	#DIV/0!	#DIV/0!	#DIV/0!								Line 13
	0	6.2617		Slope:	-16				Line 14	#DIV/0!	#DIV/0!	#DIV/0!	#DIV/0!	#DIV/0!	#DIV/0!	#DIV/0!	#DIV/0!	#DIV/0!	#DIV/0!	#DIV/0!	#DIV/0!	#DIV/0!							Line 14
	0.391356	0		y-intercept:	6.2617				Line 15	#DIV/0!	#DIV/0!	#DIV/0!	#DIV/0!	#DIV/0!	#DIV/0!	#DIV/0!	#DIV/0!	#DIV/0!	#DIV/0!	#DIV/0!	#DIV/0!	#DIV/0!	#DIV/0!						Line 15
Line 6	x	y
	0	#DIV/0!		Slope:	#VALUE!
	#DIV/0!	0		y-intercept:	#DIV/0!
Line 7	x	y																												Vmax:	0.795864
	0	#DIV/0!		Slope:	#VALUE!																									Standard dev:	0.0707525
	#DIV/0!	0		y-intercept:	#DIV/0!
Line 8	x	y
	0	#DIV/0!		Slope:	#VALUE!
	#DIV/0!	0		y-intercept:	#DIV/0!
Line 9	x	y
	0	#DIV/0!		Slope:	#VALUE!
	#DIV/0!	0		y-intercept:	#DIV/0!
Line 10	x	y
	0	#DIV/0!		Slope:	#VALUE!
	#DIV/0!	0		y-intercept:	#DIV/0!
Line 11	x	y										0	1.5124	1.7464	2.6688	3.8685	6.2617	#DIV/0!	#DIV/0!	#DIV/0!	#DIV/0!	#DIV/0!	#DIV/0!	#DIV/0!	#DIV/0!	#DIV/0!	#DIV/0!	0	0	0	0
	0	#DIV/0!		Slope:	#VALUE!							1.8905	0
	#DIV/0!	0		y-intercept:	#DIV/0!							1.0915		0
												0.6672			0
Line 12	x	y										0.483563				0
	0	#DIV/0!		Slope:	#VALUE!							0.391356					0
	#DIV/0!	0		y-intercept:	#DIV/0!							#DIV/0!						0
												#DIV/0!							0
Line 13	x	y										#DIV/0!								0
	0	#DIV/0!		Slope:	#VALUE!							#DIV/0!									0
	#DIV/0!	0		y-intercept:	#DIV/0!							#DIV/0!										0
												#DIV/0!											0
Line 14	x	y										#DIV/0!												0
	0	#DIV/0!		Slope:	#VALUE!							#DIV/0!													0
	#DIV/0!	0		y-intercept:	#DIV/0!							#DIV/0!														0
												#DIV/0!															0
Line 15	x	y										0																0
	0	#DIV/0!		Slope:	#VALUE!							0																	0
	#DIV/0!	0		y-intercept:	#DIV/0!							0																		0
												0																			0

## Sheet: Part Non-competitive
														(V_max*([S]/K_s )+bV_max*(([S]*[I])/(K_s*K_i )))/((1+([S]/K_s )+([I]/K_i )+(([S]*[I])/(K_s*K_i ))) )									Calculated values
		No Inhibitor	[I]1	[I]2	[I]3	[I]4	[I]5	[I]6	[I]7	[I]8	[I]9	[I]10	[I]11	[I]12	[I]13	[I]14	[I]15						No Inhibitor	[I]1	[I]2	[I]3	[I]4	[I]5	[I]6	[I]7	[I]8	[I]9	[I]10	[I]11	[I]12	[I]13	[I]14	[I]15
		0	0.05	0.1	0.15	0	0	0	0	0	0	0	0	0	0	0	0	Km	Vmax	bVmax	Ki		0	0.05	0.1	0.15	0	0	0	0	0	0	0	0	0	0	0	0
[S]1	1.25	0.661201	0.490798	0.426403	0.338983	0	0	0	0	0	0	0	0	0	0	0	0	0.346845	0.883555	0	0.123342		0.691641	0.492139	0.381963	0.312094	#DIV/0!	#DIV/0!	#DIV/0!	#DIV/0!	#DIV/0!	#DIV/0!	#DIV/0!	#DIV/0!	#DIV/0!	#DIV/0!	#DIV/0!	#DIV/0!		0.691641	0.492139	0.381963	0.312094	0	0	0	0	0	0
[S]2	0.625	0.572607	0.408998	0.329696	0.198299	0	0	0	0	0	0	0	0	0	0	0	0						0.56822	0.404318	0.313803	0.256402	#DIV/0!	#DIV/0!	#DIV/0!	#DIV/0!	#DIV/0!	#DIV/0!	#DIV/0!	#DIV/0!	#DIV/0!	#DIV/0!	#DIV/0!	#DIV/0!		0.56822	0.404318	0.313803	0.256402	0	0	0	0	0	0
[S]3	0.25	0.3747	0.294898	0.1924	0.129799	0	0	0	0	0	0	0	0	0	0	0	0						0.370094	0.263341	0.204387	0.167	#DIV/0!	#DIV/0!	#DIV/0!	#DIV/0!	#DIV/0!	#DIV/0!	#DIV/0!	#DIV/0!	#DIV/0!	#DIV/0!	#DIV/0!	#DIV/0!		0.370094	0.263341	0.204387	0.167	0	0	0	0	0	0
[S]4	0.125	0.258498	0.1753	0.1027	0.0742997	0	0	0	0	0	0	0	0	0	0	0	0						0.234069	0.166552	0.129266	0.105621	#DIV/0!	#DIV/0!	#DIV/0!	#DIV/0!	#DIV/0!	#DIV/0!	#DIV/0!	#DIV/0!	#DIV/0!	#DIV/0!	#DIV/0!	#DIV/0!		0.234069	0.166552	0.129266	0.105621	0	0	0	0	0	0
[S]5	0.0625	0.159701	0.0931003	0.0560356	0.0344828	0	0	0	0	0	0	0	0	0	0	0	0						0.134904	0.0959911	0.0745014	0.0608735	#DIV/0!	#DIV/0!	#DIV/0!	#DIV/0!	#DIV/0!	#DIV/0!	#DIV/0!	#DIV/0!	#DIV/0!	#DIV/0!	#DIV/0!	#DIV/0!		0.134904	0.0959911	0.0745014	0.0608735	0	0	0	0	0	0
[S]6	0	0	0	0	0	0	0	0	0	0	0	0	0	0	0	0	0			Sum R2	0.0138614		#DIV/0!	#DIV/0!	#DIV/0!	#DIV/0!	#DIV/0!	#DIV/0!	#DIV/0!	#DIV/0!	#DIV/0!	#DIV/0!	#DIV/0!	#DIV/0!	#DIV/0!	#DIV/0!	#DIV/0!	#DIV/0!		0	0	0	0	0	0	0	0	0	0
[S]7	0	0	0	0	0	0	0	0	0	0	0	0	0	0	0	0	0			Sum residuals %	2.51374		#DIV/0!	#DIV/0!	#DIV/0!	#DIV/0!	#DIV/0!	#DIV/0!	#DIV/0!	#DIV/0!	#DIV/0!	#DIV/0!	#DIV/0!	#DIV/0!	#DIV/0!	#DIV/0!	#DIV/0!	#DIV/0!		0	0	0	0	0	0	0	0	0	0
[S]8	0	0	0	0	0	0	0	0	0	0	0	0	0	0	0	0	0						#DIV/0!	#DIV/0!	#DIV/0!	#DIV/0!	#DIV/0!	#DIV/0!	#DIV/0!	#DIV/0!	#DIV/0!	#DIV/0!	#DIV/0!	#DIV/0!	#DIV/0!	#DIV/0!	#DIV/0!	#DIV/0!		0	0	0	0	0	0	0	0	0	0
[S]9	0	0	0	0	0	0	0	0	0	0	0	0	0	0	0	0	0						#DIV/0!	#DIV/0!	#DIV/0!	#DIV/0!	#DIV/0!	#DIV/0!	#DIV/0!	#DIV/0!	#DIV/0!	#DIV/0!	#DIV/0!	#DIV/0!	#DIV/0!	#DIV/0!	#DIV/0!	#DIV/0!		0	0	0	0	0	0	0	0	0	0
[S]10	0	0	0	0	0	0	0	0	0	0	0	0	0	0	0	0	0						#DIV/0!	#DIV/0!	#DIV/0!	#DIV/0!	#DIV/0!	#DIV/0!	#DIV/0!	#DIV/0!	#DIV/0!	#DIV/0!	#DIV/0!	#DIV/0!	#DIV/0!	#DIV/0!	#DIV/0!	#DIV/0!		0	0	0	0	0	0	0	0	0	0
[S]11	0	0	0	0	0	0	0	0	0	0	0	0	0	0	0	0	0						#DIV/0!	#DIV/0!	#DIV/0!	#DIV/0!	#DIV/0!	#DIV/0!	#DIV/0!	#DIV/0!	#DIV/0!	#DIV/0!	#DIV/0!	#DIV/0!	#DIV/0!	#DIV/0!	#DIV/0!	#DIV/0!		0	0	0	0	0	0	0	0	0	0
[S]12	0	0	0	0	0	0	0	0	0	0	0	0	0	0	0	0	0						#DIV/0!	#DIV/0!	#DIV/0!	#DIV/0!	#DIV/0!	#DIV/0!	#DIV/0!	#DIV/0!	#DIV/0!	#DIV/0!	#DIV/0!	#DIV/0!	#DIV/0!	#DIV/0!	#DIV/0!	#DIV/0!		0	0	0	0	0	0	0	0	0	0
[S]13	0	0	0	0	0	0	0	0	0	0	0	0	0	0	0	0	0						#DIV/0!	#DIV/0!	#DIV/0!	#DIV/0!	#DIV/0!	#DIV/0!	#DIV/0!	#DIV/0!	#DIV/0!	#DIV/0!	#DIV/0!	#DIV/0!	#DIV/0!	#DIV/0!	#DIV/0!	#DIV/0!		0	0	0	0	0	0	0	0	0	0
[S]14	0	0	0	0	0	0	0	0	0	0	0	0	0	0	0	0	0						#DIV/0!	#DIV/0!	#DIV/0!	#DIV/0!	#DIV/0!	#DIV/0!	#DIV/0!	#DIV/0!	#DIV/0!	#DIV/0!	#DIV/0!	#DIV/0!	#DIV/0!	#DIV/0!	#DIV/0!	#DIV/0!		0	0	0	0	0	0	0	0	0	0
[S]15	0	0	0	0	0	0	0	0	0	0	0	0	0	0	0	0	0						#DIV/0!	#DIV/0!	#DIV/0!	#DIV/0!	#DIV/0!	#DIV/0!	#DIV/0!	#DIV/0!	#DIV/0!	#DIV/0!	#DIV/0!	#DIV/0!	#DIV/0!	#DIV/0!	#DIV/0!	#DIV/0!		0	0	0	0	0	0	0	0	0	0
	1	1	1	1	1	#DIV/0!	#DIV/0!	#DIV/0!	#DIV/0!	#DIV/0!	#DIV/0!	#DIV/0!	#DIV/0!	#DIV/0!	#DIV/0!	#DIV/0!	#DIV/0!																					1.25	1.25	0.691641	0.492139	0.381963	0.312094	#N/A	#N/A	#N/A	#N/A	#N/A	#N/A
	1	1	1	1	1	#DIV/0!	#DIV/0!	#DIV/0!	#DIV/0!	#DIV/0!	#DIV/0!	#DIV/0!	#DIV/0!	#DIV/0!	#DIV/0!	#DIV/0!	#DIV/0!					0.661201	0.661201	0.691641		0.0304401	0.0304401	1										0.625	0.625	0.56822	0.404318	0.313803	0.256402	#N/A	#N/A	#N/A	#N/A	#N/A	#N/A
	1	1	1	1	1	#DIV/0!	#DIV/0!	#DIV/0!	#DIV/0!	#DIV/0!	#DIV/0!	#DIV/0!	#DIV/0!	#DIV/0!	#DIV/0!	#DIV/0!	#DIV/0!					0.572607	0.572607	0.56822		-0.00438667	-0.00438667	1										0.25	0.25	0.370094	0.263341	0.204387	0.167	#N/A	#N/A	#N/A	#N/A	#N/A	#N/A
	1	1	1	1	1	#DIV/0!	#DIV/0!	#DIV/0!	#DIV/0!	#DIV/0!	#DIV/0!	#DIV/0!	#DIV/0!	#DIV/0!	#DIV/0!	#DIV/0!	#DIV/0!					0.3747	0.3747	0.370094		-0.00460645	-0.00460645	1										0.125	0.125	0.234069	0.166552	0.129266	0.105621	#N/A	#N/A	#N/A	#N/A	#N/A	#N/A
	1	1	1	1	1	#DIV/0!	#DIV/0!	#DIV/0!	#DIV/0!	#DIV/0!	#DIV/0!	#DIV/0!	#DIV/0!	#DIV/0!	#DIV/0!	#DIV/0!	#DIV/0!					0.258498	0.258498	0.234069		-0.0244291	-0.0244291	1										0.0625	0.0625	0.134904	0.0959911	0.0745014	0.0608735	#N/A	#N/A	#N/A	#N/A	#N/A	#N/A
	#DIV/0!	#DIV/0!	#DIV/0!	#DIV/0!	#DIV/0!	#DIV/0!	#DIV/0!	#DIV/0!	#DIV/0!	#DIV/0!	#DIV/0!	#DIV/0!	#DIV/0!	#DIV/0!	#DIV/0!	#DIV/0!	#DIV/0!					0.159701	0.159701	0.134904		-0.0247973	-0.0247973	1										#DIV/0!	#N/A	#N/A	#N/A	#N/A	#N/A	#N/A	#N/A	#N/A	#N/A	#N/A	#N/A
	#DIV/0!	#DIV/0!	#DIV/0!	#DIV/0!	#DIV/0!	#DIV/0!	#DIV/0!	#DIV/0!	#DIV/0!	#DIV/0!	#DIV/0!	#DIV/0!	#DIV/0!	#DIV/0!	#DIV/0!	#DIV/0!	#DIV/0!					#DIV/0!	#N/A	#N/A		#DIV/0!		1										#DIV/0!	#N/A	#N/A	#N/A	#N/A	#N/A	#N/A	#N/A	#N/A	#N/A	#N/A	#N/A
	#DIV/0!	#DIV/0!	#DIV/0!	#DIV/0!	#DIV/0!	#DIV/0!	#DIV/0!	#DIV/0!	#DIV/0!	#DIV/0!	#DIV/0!	#DIV/0!	#DIV/0!	#DIV/0!	#DIV/0!	#DIV/0!	#DIV/0!					#DIV/0!	#N/A	#N/A		#DIV/0!		1										#DIV/0!	#N/A	#N/A	#N/A	#N/A	#N/A	#N/A	#N/A	#N/A	#N/A	#N/A	#N/A
	#DIV/0!	#DIV/0!	#DIV/0!	#DIV/0!	#DIV/0!	#DIV/0!	#DIV/0!	#DIV/0!	#DIV/0!	#DIV/0!	#DIV/0!	#DIV/0!	#DIV/0!	#DIV/0!	#DIV/0!	#DIV/0!	#DIV/0!					#DIV/0!	#N/A	#N/A		#DIV/0!		1										#DIV/0!	#N/A	#N/A	#N/A	#N/A	#N/A	#N/A	#N/A	#N/A	#N/A	#N/A	#N/A
	#DIV/0!	#DIV/0!	#DIV/0!	#DIV/0!	#DIV/0!	#DIV/0!	#DIV/0!	#DIV/0!	#DIV/0!	#DIV/0!	#DIV/0!	#DIV/0!	#DIV/0!	#DIV/0!	#DIV/0!	#DIV/0!	#DIV/0!					#DIV/0!	#N/A	#N/A		#DIV/0!		1										#DIV/0!	#N/A	#N/A	#N/A	#N/A	#N/A	#N/A	#N/A	#N/A	#N/A	#N/A	#N/A
	#DIV/0!	#DIV/0!	#DIV/0!	#DIV/0!	#DIV/0!	#DIV/0!	#DIV/0!	#DIV/0!	#DIV/0!	#DIV/0!	#DIV/0!	#DIV/0!	#DIV/0!	#DIV/0!	#DIV/0!	#DIV/0!	#DIV/0!					#DIV/0!	#N/A	#N/A		#DIV/0!		1										#DIV/0!	#N/A	#N/A	#N/A	#N/A	#N/A	#N/A	#N/A	#N/A	#N/A	#N/A	#N/A
	#DIV/0!	#DIV/0!	#DIV/0!	#DIV/0!	#DIV/0!	#DIV/0!	#DIV/0!	#DIV/0!	#DIV/0!	#DIV/0!	#DIV/0!	#DIV/0!	#DIV/0!	#DIV/0!	#DIV/0!	#DIV/0!	#DIV/0!					#DIV/0!	#N/A	#N/A		#DIV/0!		1										#DIV/0!	#N/A	#N/A	#N/A	#N/A	#N/A	#N/A	#N/A	#N/A	#N/A	#N/A	#N/A
	#DIV/0!	#DIV/0!	#DIV/0!	#DIV/0!	#DIV/0!	#DIV/0!	#DIV/0!	#DIV/0!	#DIV/0!	#DIV/0!	#DIV/0!	#DIV/0!	#DIV/0!	#DIV/0!	#DIV/0!	#DIV/0!	#DIV/0!					#DIV/0!	#N/A	#N/A		#DIV/0!		1										#DIV/0!	#N/A	#N/A	#N/A	#N/A	#N/A	#N/A	#N/A	#N/A	#N/A	#N/A	#N/A
	#DIV/0!	#DIV/0!	#DIV/0!	#DIV/0!	#DIV/0!	#DIV/0!	#DIV/0!	#DIV/0!	#DIV/0!	#DIV/0!	#DIV/0!	#DIV/0!	#DIV/0!	#DIV/0!	#DIV/0!	#DIV/0!	#DIV/0!					#DIV/0!	#N/A	#N/A		#DIV/0!		1										#DIV/0!	#N/A	#N/A	#N/A	#N/A	#N/A	#N/A	#N/A	#N/A	#N/A	#N/A	#N/A
	#DIV/0!	#DIV/0!	#DIV/0!	#DIV/0!	#DIV/0!	#DIV/0!	#DIV/0!	#DIV/0!	#DIV/0!	#DIV/0!	#DIV/0!	#DIV/0!	#DIV/0!	#DIV/0!	#DIV/0!	#DIV/0!	#DIV/0!					#DIV/0!	#N/A	#N/A		#DIV/0!		1										#DIV/0!	#N/A	#N/A	#N/A	#N/A	#N/A	#N/A	#N/A	#N/A	#N/A	#N/A	#N/A
																						#DIV/0!	#N/A	#N/A		#DIV/0!		1
		1	1	1	1	0	0	0	0	0	0	0	0	0	0	0	0					0.490798	0.490798	0.492139		0.00134145	0.00134145	1											0.8	1.44584	2.03195	2.61806	3.20416	#N/A	#N/A	#N/A	#N/A	#N/A	#N/A
		1	1	1	1	0	0	0	0	0	0	0	0	0	0	0	0					0.408998	0.408998	0.404318		-0.00467954	-0.00467954	1											1.6	1.75988	2.4733	3.18671	3.90013	#N/A	#N/A	#N/A	#N/A	#N/A	#N/A
		1	1	1	1	0	0	0	0	0	0	0	0	0	0	0	0					0.294898	0.294898	0.263341		-0.031557	-0.031557	1											4	2.70202	3.79735	4.89269	5.98803	#N/A	#N/A	#N/A	#N/A	#N/A	#N/A
		1	1	1	1	0	0	0	0	0	0	0	0	0	0	0	0					0.1753	0.1753	0.166552		-0.00874772	-0.00874772	1											8	4.27224	6.00411	7.73598	9.46785	#N/A	#N/A	#N/A	#N/A	#N/A	#N/A
		1	1	1	1	0	0	0	0	0	0	0	0	0	0	0	0					0.0931003	0.0931003	0.0959911		0.00289076	0.00289076	1											16	7.4127	10.4176	13.4226	16.4275	#N/A	#N/A	#N/A	#N/A	#N/A	#N/A
		0	0	0	0	0	0	0	0	0	0	0	0	0	0	0	0					#DIV/0!	#N/A	#N/A		#DIV/0!		1											#N/A	#N/A	#N/A	#N/A	#N/A	#N/A	#N/A	#N/A	#N/A	#N/A	#N/A
		0	0	0	0	0	0	0	0	0	0	0	0	0	0	0	0					#DIV/0!	#N/A	#N/A		#DIV/0!		1											#N/A	#N/A	#N/A	#N/A	#N/A	#N/A	#N/A	#N/A	#N/A	#N/A	#N/A
		0	0	0	0	0	0	0	0	0	0	0	0	0	0	0	0					#DIV/0!	#N/A	#N/A		#DIV/0!		1											#N/A	#N/A	#N/A	#N/A	#N/A	#N/A	#N/A	#N/A	#N/A	#N/A	#N/A
		0	0	0	0	0	0	0	0	0	0	0	0	0	0	0	0					#DIV/0!	#N/A	#N/A		#DIV/0!		1											#N/A	#N/A	#N/A	#N/A	#N/A	#N/A	#N/A	#N/A	#N/A	#N/A	#N/A
		0	0	0	0	0	0	0	0	0	0	0	0	0	0	0	0					#DIV/0!	#N/A	#N/A		#DIV/0!		1											#N/A	#N/A	#N/A	#N/A	#N/A	#N/A	#N/A	#N/A	#N/A	#N/A	#N/A
		0	0	0	0	0	0	0	0	0	0	0	0	0	0	0	0					#DIV/0!	#N/A	#N/A		#DIV/0!		1											#N/A	#N/A	#N/A	#N/A	#N/A	#N/A	#N/A	#N/A	#N/A	#N/A	#N/A
		0	0	0	0	0	0	0	0	0	0	0	0	0	0	0	0					#DIV/0!	#N/A	#N/A		#DIV/0!		1											#N/A	#N/A	#N/A	#N/A	#N/A	#N/A	#N/A	#N/A	#N/A	#N/A	#N/A
		0	0	0	0	0	0	0	0	0	0	0	0	0	0	0	0					#DIV/0!	#N/A	#N/A		#DIV/0!		1											#N/A	#N/A	#N/A	#N/A	#N/A	#N/A	#N/A	#N/A	#N/A	#N/A	#N/A
		0	0	0	0	0	0	0	0	0	0	0	0	0	0	0	0					#DIV/0!	#N/A	#N/A		#DIV/0!		1											#N/A	#N/A	#N/A	#N/A	#N/A	#N/A	#N/A	#N/A	#N/A	#N/A	#N/A
		0	0	0	0	0	0	0	0	0	0	0	0	0	0	0	0					#DIV/0!	#N/A	#N/A		#DIV/0!		1											#N/A	#N/A	#N/A	#N/A	#N/A	#N/A	#N/A	#N/A	#N/A	#N/A	#N/A
																						0.426403	0.426403	0.381963		-0.04444	-0.04444	1
n	20																					0.329696	0.329696	0.313803		-0.0158928	-0.0158928	1												0.661201	0.490798	0.426403	0.338983	#DIV/0!	#DIV/0!	#DIV/0!	#DIV/0!	#DIV/0!	#DIV/0!
																						0.1924	0.1924	0.204387		0.0119863	0.0119863	1												0.572607	0.408998	0.329696	0.198299	#DIV/0!	#DIV/0!	#DIV/0!	#DIV/0!	#DIV/0!	#DIV/0!
																						0.1027	0.1027	0.129266		0.0265661	0.0265661	1												0.3747	0.294898	0.1924	0.129799	#DIV/0!	#DIV/0!	#DIV/0!	#DIV/0!	#DIV/0!	#DIV/0!
																						0.0560356	0.0560356	0.0745014		0.0184658	0.0184658	1												0.258498	0.1753	0.1027	0.0742997	#DIV/0!	#DIV/0!	#DIV/0!	#DIV/0!	#DIV/0!	#DIV/0!
																						#DIV/0!	#N/A	#N/A		#DIV/0!		1												0.159701	0.0931003	0.0560356	0.0344828	#DIV/0!	#DIV/0!	#DIV/0!	#DIV/0!	#DIV/0!	#DIV/0!
																						#DIV/0!	#N/A	#N/A		#DIV/0!		1												#DIV/0!	#DIV/0!	#DIV/0!	#DIV/0!	#DIV/0!	#DIV/0!	#DIV/0!	#DIV/0!	#DIV/0!	#DIV/0!
																						#DIV/0!	#N/A	#N/A		#DIV/0!		1												#DIV/0!	#DIV/0!	#DIV/0!	#DIV/0!	#DIV/0!	#DIV/0!	#DIV/0!	#DIV/0!	#DIV/0!	#DIV/0!
																						#DIV/0!	#N/A	#N/A		#DIV/0!		1												#DIV/0!	#DIV/0!	#DIV/0!	#DIV/0!	#DIV/0!	#DIV/0!	#DIV/0!	#DIV/0!	#DIV/0!	#DIV/0!
																						#DIV/0!	#N/A	#N/A		#DIV/0!		1												#DIV/0!	#DIV/0!	#DIV/0!	#DIV/0!	#DIV/0!	#DIV/0!	#DIV/0!	#DIV/0!	#DIV/0!	#DIV/0!
																						#DIV/0!	#N/A	#N/A		#DIV/0!		1												#DIV/0!	#DIV/0!	#DIV/0!	#DIV/0!	#DIV/0!	#DIV/0!	#DIV/0!	#DIV/0!	#DIV/0!	#DIV/0!
																						#DIV/0!	#N/A	#N/A		#DIV/0!		1												#DIV/0!	#DIV/0!	#DIV/0!	#DIV/0!	#DIV/0!	#DIV/0!	#DIV/0!	#DIV/0!	#DIV/0!	#DIV/0!
																						#DIV/0!	#N/A	#N/A		#DIV/0!		1												#DIV/0!	#DIV/0!	#DIV/0!	#DIV/0!	#DIV/0!	#DIV/0!	#DIV/0!	#DIV/0!	#DIV/0!	#DIV/0!
																						#DIV/0!	#N/A	#N/A		#DIV/0!		1												#DIV/0!	#DIV/0!	#DIV/0!	#DIV/0!	#DIV/0!	#DIV/0!	#DIV/0!	#DIV/0!	#DIV/0!	#DIV/0!
																						#DIV/0!	#N/A	#N/A		#DIV/0!		1												#DIV/0!	#DIV/0!	#DIV/0!	#DIV/0!	#DIV/0!	#DIV/0!	#DIV/0!	#DIV/0!	#DIV/0!	#DIV/0!
																						0.338983	0.338983	0.312094		-0.0268892	-0.0268892	1												#DIV/0!	#DIV/0!	#DIV/0!	#DIV/0!	#DIV/0!	#DIV/0!	#DIV/0!	#DIV/0!	#DIV/0!	#DIV/0!
																						0.198299	0.198299	0.256402		0.0581031	0.0581031	1
																						0.129799	0.129799	0.167		0.0372006	0.0372006	1												1/s	0	0.05	0.1	0.15	0	0	0	0	0
																						0.0742997	0.0742997	0.105621		0.0313208	0.0313208	1											1	0.8	1.44584	2.03195	2.61806	3.20416	#N/A	#N/A	#N/A	#N/A	#N/A
																						0.0344828	0.0344828	0.0608735		0.0263908	0.0263908	1											2	1.6	1.75988	2.4733	3.18671	3.90013	#N/A	#N/A	#N/A	#N/A	#N/A
																						#DIV/0!	#N/A	#N/A		#DIV/0!		1											3	4	2.70202	3.79735	4.89269	5.98803	#N/A	#N/A	#N/A	#N/A	#N/A
																						#DIV/0!	#N/A	#N/A		#DIV/0!		1											4	8	4.27224	6.00411	7.73598	9.46785	#N/A	#N/A	#N/A	#N/A	#N/A
																						#DIV/0!	#N/A	#N/A		#DIV/0!		1											5	16	7.4127	10.4176	13.4226	16.4275	#N/A	#N/A	#N/A	#N/A	#N/A
																						#DIV/0!	#N/A	#N/A		#DIV/0!		1											6	#N/A	#N/A	#N/A	#N/A	#N/A	#N/A	#N/A	#N/A	#N/A	#N/A
																						#DIV/0!	#N/A	#N/A		#DIV/0!		1											7	#N/A	#N/A	#N/A	#N/A	#N/A	#N/A	#N/A	#N/A	#N/A	#N/A
																						#DIV/0!	#N/A	#N/A		#DIV/0!		1											8	#N/A	#N/A	#N/A	#N/A	#N/A	#N/A	#N/A	#N/A	#N/A	#N/A
																						#DIV/0!	#N/A	#N/A		#DIV/0!		1											9	#N/A	#N/A	#N/A	#N/A	#N/A	#N/A	#N/A	#N/A	#N/A	#N/A
																						#DIV/0!	#N/A	#N/A		#DIV/0!		1											10	#N/A	#N/A	#N/A	#N/A	#N/A	#N/A	#N/A	#N/A	#N/A	#N/A
																						#DIV/0!	#N/A	#N/A		#DIV/0!		1											11	#N/A	#N/A	#N/A	#N/A	#N/A	#N/A	#N/A	#N/A	#N/A	#N/A
																						#DIV/0!	#N/A	#N/A		#DIV/0!		1											12	#N/A	#N/A	#N/A	#N/A	#N/A	#N/A	#N/A	#N/A	#N/A	#N/A
																						#DIV/0!	#N/A	#N/A		#DIV/0!		1											13	#N/A	#N/A	#N/A	#N/A	#N/A	#N/A	#N/A	#N/A	#N/A	#N/A
																						#DIV/0!	#N/A	#N/A		#DIV/0!		1											14	#N/A	#N/A	#N/A	#N/A	#N/A	#N/A	#N/A	#N/A	#N/A	#N/A
																						#DIV/0!	#N/A	#N/A		#DIV/0!		1											15	#N/A	#N/A	#N/A	#N/A	#N/A	#N/A	#N/A	#N/A	#N/A	#N/A
																						#DIV/0!	#N/A	#N/A		#DIV/0!		1
																						#DIV/0!	#N/A	#N/A		#DIV/0!		1
																						#DIV/0!	#N/A	#N/A		#DIV/0!		1
																						#DIV/0!	#N/A	#N/A		#DIV/0!		1
																						#DIV/0!	#N/A	#N/A		#DIV/0!		1
																						#DIV/0!	#N/A	#N/A		#DIV/0!		1
																						#DIV/0!	#N/A	#N/A		#DIV/0!		1
																						#DIV/0!	#N/A	#N/A		#DIV/0!		1
																						#DIV/0!	#N/A	#N/A		#DIV/0!		1
																						#DIV/0!	#N/A	#N/A		#DIV/0!		1
																						#DIV/0!	#N/A	#N/A		#DIV/0!		1
																						#DIV/0!	#N/A	#N/A		#DIV/0!		1
																						#DIV/0!	#N/A	#N/A		#DIV/0!		1
																						#DIV/0!	#N/A	#N/A		#DIV/0!		1
																						#DIV/0!	#N/A	#N/A		#DIV/0!		1
																						#DIV/0!	#N/A	#N/A		#DIV/0!		1
																						#DIV/0!	#N/A	#N/A		#DIV/0!		1
																						#DIV/0!	#N/A	#N/A		#DIV/0!		1
																						#DIV/0!	#N/A	#N/A		#DIV/0!		1
																						#DIV/0!	#N/A	#N/A		#DIV/0!		1
																						#DIV/0!	#N/A	#N/A		#DIV/0!		1
																						#DIV/0!	#N/A	#N/A		#DIV/0!		1
																						#DIV/0!	#N/A	#N/A		#DIV/0!		1
																						#DIV/0!	#N/A	#N/A		#DIV/0!		1
																						#DIV/0!	#N/A	#N/A		#DIV/0!		1
																						#DIV/0!	#N/A	#N/A		#DIV/0!		1
																						#DIV/0!	#N/A	#N/A		#DIV/0!		1
																						#DIV/0!	#N/A	#N/A		#DIV/0!		1
																						#DIV/0!	#N/A	#N/A		#DIV/0!		1
																						#DIV/0!	#N/A	#N/A		#DIV/0!		1
																						#DIV/0!	#N/A	#N/A		#DIV/0!		1
																						#DIV/0!	#N/A	#N/A		#DIV/0!		1
																						#DIV/0!	#N/A	#N/A		#DIV/0!		1
																						#DIV/0!	#N/A	#N/A		#DIV/0!		1
																						#DIV/0!	#N/A	#N/A		#DIV/0!		1
																						#DIV/0!	#N/A	#N/A		#DIV/0!		1
																						#DIV/0!	#N/A	#N/A		#DIV/0!		1
																						#DIV/0!	#N/A	#N/A		#DIV/0!		1
																						#DIV/0!	#N/A	#N/A		#DIV/0!		1
																						#DIV/0!	#N/A	#N/A		#DIV/0!		1
																						#DIV/0!	#N/A	#N/A		#DIV/0!		1
																						#DIV/0!	#N/A	#N/A		#DIV/0!		1
																						#DIV/0!	#N/A	#N/A		#DIV/0!		1
																						#DIV/0!	#N/A	#N/A		#DIV/0!		1
																						#DIV/0!	#N/A	#N/A		#DIV/0!		1
																						#DIV/0!	#N/A	#N/A		#DIV/0!		1
																						#DIV/0!	#N/A	#N/A		#DIV/0!		1
																						#DIV/0!	#N/A	#N/A		#DIV/0!		1
																						#DIV/0!	#N/A	#N/A		#DIV/0!		1
																						#DIV/0!	#N/A	#N/A		#DIV/0!		1
																						#DIV/0!	#N/A	#N/A		#DIV/0!		1
																						#DIV/0!	#N/A	#N/A		#DIV/0!		1
																						#DIV/0!	#N/A	#N/A		#DIV/0!		1
																						#DIV/0!	#N/A	#N/A		#DIV/0!		1
																						#DIV/0!	#N/A	#N/A		#DIV/0!		1
																						#DIV/0!	#N/A	#N/A		#DIV/0!		1
																						#DIV/0!	#N/A	#N/A		#DIV/0!		1
																						#DIV/0!	#N/A	#N/A		#DIV/0!		1
																						#DIV/0!	#N/A	#N/A		#DIV/0!		1
																						#DIV/0!	#N/A	#N/A		#DIV/0!		1
																						#DIV/0!	#N/A	#N/A		#DIV/0!		1
																						#DIV/0!	#N/A	#N/A		#DIV/0!		1
																						#DIV/0!	#N/A	#N/A		#DIV/0!		1
																						#DIV/0!	#N/A	#N/A		#DIV/0!		1
																						#DIV/0!	#N/A	#N/A		#DIV/0!		1
																						#DIV/0!	#N/A	#N/A		#DIV/0!		1
																						#DIV/0!	#N/A	#N/A		#DIV/0!		1
																						#DIV/0!	#N/A	#N/A		#DIV/0!		1
																						#DIV/0!	#N/A	#N/A		#DIV/0!		1
																						#DIV/0!	#N/A	#N/A		#DIV/0!		1
																						#DIV/0!	#N/A	#N/A		#DIV/0!		1
																						#DIV/0!	#N/A	#N/A		#DIV/0!		1
																						#DIV/0!	#N/A	#N/A		#DIV/0!		1
																						#DIV/0!	#N/A	#N/A		#DIV/0!		1
																						#DIV/0!	#N/A	#N/A		#DIV/0!		1
																						#DIV/0!	#N/A	#N/A		#DIV/0!		1
																						#DIV/0!	#N/A	#N/A		#DIV/0!		1
																						#DIV/0!	#N/A	#N/A		#DIV/0!		1
																						#DIV/0!	#N/A	#N/A		#DIV/0!		1
																						#DIV/0!	#N/A	#N/A		#DIV/0!		1
																						#DIV/0!	#N/A	#N/A		#DIV/0!		1
																						#DIV/0!	#N/A	#N/A		#DIV/0!		1
																						#DIV/0!	#N/A	#N/A		#DIV/0!		1
																						#DIV/0!	#N/A	#N/A		#DIV/0!		1
																						#DIV/0!	#N/A	#N/A		#DIV/0!		1
																						#DIV/0!	#N/A	#N/A		#DIV/0!		1
																						#DIV/0!	#N/A	#N/A		#DIV/0!		1
																						#DIV/0!	#N/A	#N/A		#DIV/0!		1
																						#DIV/0!	#N/A	#N/A		#DIV/0!		1
																						#DIV/0!	#N/A	#N/A		#DIV/0!		1
																						#DIV/0!	#N/A	#N/A		#DIV/0!		1
																						#DIV/0!	#N/A	#N/A		#DIV/0!		1
																						#DIV/0!	#N/A	#N/A		#DIV/0!		1
																						#DIV/0!	#N/A	#N/A		#DIV/0!		1
																						#DIV/0!	#N/A	#N/A		#DIV/0!		1
																						#DIV/0!	#N/A	#N/A		#DIV/0!		1
																						#DIV/0!	#N/A	#N/A		#DIV/0!		1
																						#DIV/0!	#N/A	#N/A		#DIV/0!		1
																						#DIV/0!	#N/A	#N/A		#DIV/0!		1
																						#DIV/0!	#N/A	#N/A		#DIV/0!		1
																						#DIV/0!	#N/A	#N/A		#DIV/0!		1
																						#DIV/0!	#N/A	#N/A		#DIV/0!		1
																						#DIV/0!	#N/A	#N/A		#DIV/0!		1
																						#DIV/0!	#N/A	#N/A		#DIV/0!		1
																						#DIV/0!	#N/A	#N/A		#DIV/0!		1
																						#DIV/0!	#N/A	#N/A		#DIV/0!		1
																						#DIV/0!	#N/A	#N/A		#DIV/0!		1
																						#DIV/0!	#N/A	#N/A		#DIV/0!		1
																						#DIV/0!	#N/A	#N/A		#DIV/0!		1
																						#DIV/0!	#N/A	#N/A		#DIV/0!		1
																						#DIV/0!	#N/A	#N/A		#DIV/0!		1
																						#DIV/0!	#N/A	#N/A		#DIV/0!		1
																						#DIV/0!	#N/A	#N/A		#DIV/0!		1
																						#DIV/0!	#N/A	#N/A		#DIV/0!		1
																						#DIV/0!	#N/A	#N/A		#DIV/0!		1
																						#DIV/0!	#N/A	#N/A		#DIV/0!		1
																						#DIV/0!	#N/A	#N/A		#DIV/0!		1
																						#DIV/0!	#N/A	#N/A		#DIV/0!		1
																						#DIV/0!	#N/A	#N/A		#DIV/0!		1
																						#DIV/0!	#N/A	#N/A		#DIV/0!		1
																						#DIV/0!	#N/A	#N/A		#DIV/0!		1
																						#DIV/0!	#N/A	#N/A		#DIV/0!		1
																						#DIV/0!	#N/A	#N/A		#DIV/0!		1
																						#DIV/0!	#N/A	#N/A		#DIV/0!		1
																						#DIV/0!	#N/A	#N/A		#DIV/0!		1
																						#DIV/0!	#N/A	#N/A		#DIV/0!		1
																						#DIV/0!	#N/A	#N/A		#DIV/0!		1
																						#DIV/0!	#N/A	#N/A		#DIV/0!		1
																						#DIV/0!	#N/A	#N/A		#DIV/0!		1
																						#DIV/0!	#N/A	#N/A		#DIV/0!		1
																						#DIV/0!	#N/A	#N/A		#DIV/0!		1
																						#DIV/0!	#N/A	#N/A		#DIV/0!		1
																						#DIV/0!	#N/A	#N/A		#DIV/0!		1
																						#DIV/0!	#N/A	#N/A		#DIV/0!		1
																						#DIV/0!	#N/A	#N/A		#DIV/0!		1
																						#DIV/0!	#N/A	#N/A		#DIV/0!		1
																						#DIV/0!	#N/A	#N/A		#DIV/0!		1
																						#DIV/0!	#N/A	#N/A		#DIV/0!		1
																						#DIV/0!	#N/A	#N/A		#DIV/0!		1
																						#DIV/0!	#N/A	#N/A		#DIV/0!		1
																						#DIV/0!	#N/A	#N/A		#DIV/0!		1
																						#DIV/0!	#N/A	#N/A		#DIV/0!		1
																						#DIV/0!	#N/A	#N/A		#DIV/0!		1
																						#DIV/0!	#N/A	#N/A		#DIV/0!		1
																						#DIV/0!	#N/A	#N/A		#DIV/0!		1
																						#DIV/0!	#N/A	#N/A		#DIV/0!		1
																						#DIV/0!	#N/A	#N/A		#DIV/0!		1
																						#DIV/0!	#N/A	#N/A		#DIV/0!		1
																						#DIV/0!	#N/A	#N/A		#DIV/0!		1
																						#DIV/0!	#N/A	#N/A		#DIV/0!		1
																						#DIV/0!	#N/A	#N/A		#DIV/0!		1
																						#DIV/0!	#N/A	#N/A		#DIV/0!		1
																						#DIV/0!	#N/A	#N/A		#DIV/0!		1
																						#DIV/0!	#N/A	#N/A		#DIV/0!		1
																						#DIV/0!	#N/A	#N/A		#DIV/0!		1
																						#DIV/0!	#N/A	#N/A		#DIV/0!		1
																						#DIV/0!	#N/A	#N/A		#DIV/0!		1
																						#DIV/0!	#N/A	#N/A		#DIV/0!		1
																						#DIV/0!	#N/A	#N/A		#DIV/0!		1
																						#DIV/0!	#N/A	#N/A		#DIV/0!		1
																						#DIV/0!	#N/A	#N/A		#DIV/0!		1
																						#DIV/0!	#N/A	#N/A		#DIV/0!		1
																						#DIV/0!	#N/A	#N/A		#DIV/0!		1
																						#DIV/0!	#N/A	#N/A		#DIV/0!		1
																						#DIV/0!	#N/A	#N/A		#DIV/0!		1
																						#DIV/0!	#N/A	#N/A		#DIV/0!		1
																						#DIV/0!	#N/A	#N/A		#DIV/0!		1
																						#DIV/0!	#N/A	#N/A		#DIV/0!		1
																						#DIV/0!	#N/A	#N/A		#DIV/0!		1
																						#DIV/0!	#N/A	#N/A		#DIV/0!		1
																						#DIV/0!	#N/A	#N/A		#DIV/0!		1
																						#DIV/0!	#N/A	#N/A		#DIV/0!		1
																						#DIV/0!	#N/A	#N/A		#DIV/0!		1
																						#DIV/0!	#N/A	#N/A		#DIV/0!		1
																						#DIV/0!	#N/A	#N/A		#DIV/0!		1
																						#DIV/0!	#N/A	#N/A		#DIV/0!		1
																						#DIV/0!	#N/A	#N/A		#DIV/0!		1
[truncated: 54 more columns]

## Sheet: Partial Competitive
																V_max*(([S]/K_s )+([S]/(aK_s*K_i )))/((1+([S]/K_s )+([I]/K_i )+(([S]*[I])/(aK_s*K_i ))) )							Calculated values
		No Inhibitor	[I]1	[I]2	[I]3	[I]4	[I]5	[I]6	[I]7	[I]8	[I]9	[I]10	[I]11	[I]12	[I]13	[I]14	[I]15						No Inhibitor	[I]1	[I]2	[I]3	[I]4	[I]5	[I]6	[I]7	[I]8	[I]9	[I]10	[I]11	[I]12	[I]13	[I]14	[I]15
		0	0.05	0.1	0.15	0	0	0	0	0	0	0	0	0	0	0	0	Km	aKm	Vmax	Ki		0	0.05	0.1	0.15	0	0	0	0	0	0	0	0	0	0	0	0
[S]1	1.25	0.661201	0.490798	0.426403	0.338983	0	0	0	0	0	0	0	0	0	0	0	0	0.252966	1.10033	0.154148	0.0547987		0.666061	0.50154	0.402195	0.335699	#DIV/0!	#DIV/0!	#DIV/0!	#DIV/0!	#DIV/0!	#DIV/0!	#DIV/0!	#DIV/0!	#DIV/0!	#DIV/0!	#DIV/0!	#DIV/0!		0.666061	0.50154	0.402195	0.335699	0	0	0	0	0	0
[S]2	0.625	0.572607	0.408998	0.329696	0.198299	0	0	0	0	0	0	0	0	0	0	0	0						0.570106	0.403694	0.312481	0.25489	#DIV/0!	#DIV/0!	#DIV/0!	#DIV/0!	#DIV/0!	#DIV/0!	#DIV/0!	#DIV/0!	#DIV/0!	#DIV/0!	#DIV/0!	#DIV/0!		0.570106	0.403694	0.312481	0.25489	0	0	0	0	0	0
[S]3	0.25	0.3747	0.294898	0.1924	0.129799	0	0	0	0	0	0	0	0	0	0	0	0						0.398066	0.254653	0.187207	0.148007	#DIV/0!	#DIV/0!	#DIV/0!	#DIV/0!	#DIV/0!	#DIV/0!	#DIV/0!	#DIV/0!	#DIV/0!	#DIV/0!	#DIV/0!	#DIV/0!		0.398066	0.254653	0.187207	0.148007	0	0	0	0	0	0
[S]4	0.125	0.258498	0.1753	0.1027	0.0742997	0	0	0	0	0	0	0	0	0	0	0	0						0.264856	0.157648	0.112223	0.0871197	#DIV/0!	#DIV/0!	#DIV/0!	#DIV/0!	#DIV/0!	#DIV/0!	#DIV/0!	#DIV/0!	#DIV/0!	#DIV/0!	#DIV/0!	#DIV/0!		0.264856	0.157648	0.112223	0.0871197	0	0	0	0	0	0
[S]5	0.0625	0.159701	0.0931003	0.0560356	0.0344828	0	0	0	0	0	0	0	0	0	0	0	0						0.158665	0.0894784	0.0623085	0.0477955	#DIV/0!	#DIV/0!	#DIV/0!	#DIV/0!	#DIV/0!	#DIV/0!	#DIV/0!	#DIV/0!	#DIV/0!	#DIV/0!	#DIV/0!	#DIV/0!		0.158665	0.0894784	0.0623085	0.0477955	0	0	0	0	0	0
[S]6	0	0	0	0	0	0	0	0	0	0	0	0	0	0	0	0	0			Sum R2	0.00763113		#DIV/0!	#DIV/0!	#DIV/0!	#DIV/0!	#DIV/0!	#DIV/0!	#DIV/0!	#DIV/0!	#DIV/0!	#DIV/0!	#DIV/0!	#DIV/0!	#DIV/0!	#DIV/0!	#DIV/0!	#DIV/0!		0	0	0	0	0	0	0	0	0	0
[S]7	0	0	0	0	0	0	0	0	0	0	0	0	0	0	0	0	0			Sum residuals %	1.55503		#DIV/0!	#DIV/0!	#DIV/0!	#DIV/0!	#DIV/0!	#DIV/0!	#DIV/0!	#DIV/0!	#DIV/0!	#DIV/0!	#DIV/0!	#DIV/0!	#DIV/0!	#DIV/0!	#DIV/0!	#DIV/0!		0	0	0	0	0	0	0	0	0	0
[S]8	0	0	0	0	0	0	0	0	0	0	0	0	0	0	0	0	0						#DIV/0!	#DIV/0!	#DIV/0!	#DIV/0!	#DIV/0!	#DIV/0!	#DIV/0!	#DIV/0!	#DIV/0!	#DIV/0!	#DIV/0!	#DIV/0!	#DIV/0!	#DIV/0!	#DIV/0!	#DIV/0!		0	0	0	0	0	0	0	0	0	0
[S]9	0	0	0	0	0	0	0	0	0	0	0	0	0	0	0	0	0						#DIV/0!	#DIV/0!	#DIV/0!	#DIV/0!	#DIV/0!	#DIV/0!	#DIV/0!	#DIV/0!	#DIV/0!	#DIV/0!	#DIV/0!	#DIV/0!	#DIV/0!	#DIV/0!	#DIV/0!	#DIV/0!		0	0	0	0	0	0	0	0	0	0
[S]10	0	0	0	0	0	0	0	0	0	0	0	0	0	0	0	0	0						#DIV/0!	#DIV/0!	#DIV/0!	#DIV/0!	#DIV/0!	#DIV/0!	#DIV/0!	#DIV/0!	#DIV/0!	#DIV/0!	#DIV/0!	#DIV/0!	#DIV/0!	#DIV/0!	#DIV/0!	#DIV/0!		0	0	0	0	0	0	0	0	0	0
[S]11	0	0	0	0	0	0	0	0	0	0	0	0	0	0	0	0	0						#DIV/0!	#DIV/0!	#DIV/0!	#DIV/0!	#DIV/0!	#DIV/0!	#DIV/0!	#DIV/0!	#DIV/0!	#DIV/0!	#DIV/0!	#DIV/0!	#DIV/0!	#DIV/0!	#DIV/0!	#DIV/0!		0	0	0	0	0	0	0	0	0	0
[S]12	0	0	0	0	0	0	0	0	0	0	0	0	0	0	0	0	0						#DIV/0!	#DIV/0!	#DIV/0!	#DIV/0!	#DIV/0!	#DIV/0!	#DIV/0!	#DIV/0!	#DIV/0!	#DIV/0!	#DIV/0!	#DIV/0!	#DIV/0!	#DIV/0!	#DIV/0!	#DIV/0!		0	0	0	0	0	0	0	0	0	0
[S]13	0	0	0	0	0	0	0	0	0	0	0	0	0	0	0	0	0						#DIV/0!	#DIV/0!	#DIV/0!	#DIV/0!	#DIV/0!	#DIV/0!	#DIV/0!	#DIV/0!	#DIV/0!	#DIV/0!	#DIV/0!	#DIV/0!	#DIV/0!	#DIV/0!	#DIV/0!	#DIV/0!		0	0	0	0	0	0	0	0	0	0
[S]14	0	0	0	0	0	0	0	0	0	0	0	0	0	0	0	0	0						#DIV/0!	#DIV/0!	#DIV/0!	#DIV/0!	#DIV/0!	#DIV/0!	#DIV/0!	#DIV/0!	#DIV/0!	#DIV/0!	#DIV/0!	#DIV/0!	#DIV/0!	#DIV/0!	#DIV/0!	#DIV/0!		0	0	0	0	0	0	0	0	0	0
[S]15	0	0	0	0	0	0	0	0	0	0	0	0	0	0	0	0	0						#DIV/0!	#DIV/0!	#DIV/0!	#DIV/0!	#DIV/0!	#DIV/0!	#DIV/0!	#DIV/0!	#DIV/0!	#DIV/0!	#DIV/0!	#DIV/0!	#DIV/0!	#DIV/0!	#DIV/0!	#DIV/0!		0	0	0	0	0	0	0	0	0	0
	1	1	1	1	1	#DIV/0!	#DIV/0!	#DIV/0!	#DIV/0!	#DIV/0!	#DIV/0!	#DIV/0!	#DIV/0!	#DIV/0!	#DIV/0!	#DIV/0!	#DIV/0!																					1.25	1.25	0.666061	0.50154	0.402195	0.335699	#N/A	#N/A	#N/A	#N/A	#N/A	#N/A
	1	1	1	1	1	#DIV/0!	#DIV/0!	#DIV/0!	#DIV/0!	#DIV/0!	#DIV/0!	#DIV/0!	#DIV/0!	#DIV/0!	#DIV/0!	#DIV/0!	#DIV/0!					0.661201	0.661201	0.666061		0.00486048	0.00486048	2										0.625	0.625	0.570106	0.403694	0.312481	0.25489	#N/A	#N/A	#N/A	#N/A	#N/A	#N/A
	1	1	1	1	1	#DIV/0!	#DIV/0!	#DIV/0!	#DIV/0!	#DIV/0!	#DIV/0!	#DIV/0!	#DIV/0!	#DIV/0!	#DIV/0!	#DIV/0!	#DIV/0!					0.572607	0.572607	0.570106		-0.00250052	-0.00250052	2										0.25	0.25	0.398066	0.254653	0.187207	0.148007	#N/A	#N/A	#N/A	#N/A	#N/A	#N/A
	1	1	1	1	1	#DIV/0!	#DIV/0!	#DIV/0!	#DIV/0!	#DIV/0!	#DIV/0!	#DIV/0!	#DIV/0!	#DIV/0!	#DIV/0!	#DIV/0!	#DIV/0!					0.3747	0.3747	0.398066		0.0233654	0.0233654	2										0.125	0.125	0.264856	0.157648	0.112223	0.0871197	#N/A	#N/A	#N/A	#N/A	#N/A	#N/A
	1	1	1	1	1	#DIV/0!	#DIV/0!	#DIV/0!	#DIV/0!	#DIV/0!	#DIV/0!	#DIV/0!	#DIV/0!	#DIV/0!	#DIV/0!	#DIV/0!	#DIV/0!					0.258498	0.258498	0.264856		0.00635831	0.00635831	2										0.0625	0.0625	0.158665	0.0894784	0.0623085	0.0477955	#N/A	#N/A	#N/A	#N/A	#N/A	#N/A
	#DIV/0!	#DIV/0!	#DIV/0!	#DIV/0!	#DIV/0!	#DIV/0!	#DIV/0!	#DIV/0!	#DIV/0!	#DIV/0!	#DIV/0!	#DIV/0!	#DIV/0!	#DIV/0!	#DIV/0!	#DIV/0!	#DIV/0!					0.159701	0.159701	0.158665		-0.0010362	-0.0010362	2										#DIV/0!	#N/A	#N/A	#N/A	#N/A	#N/A	#N/A	#N/A	#N/A	#N/A	#N/A	#N/A
	#DIV/0!	#DIV/0!	#DIV/0!	#DIV/0!	#DIV/0!	#DIV/0!	#DIV/0!	#DIV/0!	#DIV/0!	#DIV/0!	#DIV/0!	#DIV/0!	#DIV/0!	#DIV/0!	#DIV/0!	#DIV/0!	#DIV/0!					#DIV/0!	#N/A	#N/A		#DIV/0!		2										#DIV/0!	#N/A	#N/A	#N/A	#N/A	#N/A	#N/A	#N/A	#N/A	#N/A	#N/A	#N/A
	#DIV/0!	#DIV/0!	#DIV/0!	#DIV/0!	#DIV/0!	#DIV/0!	#DIV/0!	#DIV/0!	#DIV/0!	#DIV/0!	#DIV/0!	#DIV/0!	#DIV/0!	#DIV/0!	#DIV/0!	#DIV/0!	#DIV/0!					#DIV/0!	#N/A	#N/A		#DIV/0!		2										#DIV/0!	#N/A	#N/A	#N/A	#N/A	#N/A	#N/A	#N/A	#N/A	#N/A	#N/A	#N/A
	#DIV/0!	#DIV/0!	#DIV/0!	#DIV/0!	#DIV/0!	#DIV/0!	#DIV/0!	#DIV/0!	#DIV/0!	#DIV/0!	#DIV/0!	#DIV/0!	#DIV/0!	#DIV/0!	#DIV/0!	#DIV/0!	#DIV/0!					#DIV/0!	#N/A	#N/A		#DIV/0!		2										#DIV/0!	#N/A	#N/A	#N/A	#N/A	#N/A	#N/A	#N/A	#N/A	#N/A	#N/A	#N/A
	#DIV/0!	#DIV/0!	#DIV/0!	#DIV/0!	#DIV/0!	#DIV/0!	#DIV/0!	#DIV/0!	#DIV/0!	#DIV/0!	#DIV/0!	#DIV/0!	#DIV/0!	#DIV/0!	#DIV/0!	#DIV/0!	#DIV/0!					#DIV/0!	#N/A	#N/A		#DIV/0!		2										#DIV/0!	#N/A	#N/A	#N/A	#N/A	#N/A	#N/A	#N/A	#N/A	#N/A	#N/A	#N/A
	#DIV/0!	#DIV/0!	#DIV/0!	#DIV/0!	#DIV/0!	#DIV/0!	#DIV/0!	#DIV/0!	#DIV/0!	#DIV/0!	#DIV/0!	#DIV/0!	#DIV/0!	#DIV/0!	#DIV/0!	#DIV/0!	#DIV/0!					#DIV/0!	#N/A	#N/A		#DIV/0!		2										#DIV/0!	#N/A	#N/A	#N/A	#N/A	#N/A	#N/A	#N/A	#N/A	#N/A	#N/A	#N/A
	#DIV/0!	#DIV/0!	#DIV/0!	#DIV/0!	#DIV/0!	#DIV/0!	#DIV/0!	#DIV/0!	#DIV/0!	#DIV/0!	#DIV/0!	#DIV/0!	#DIV/0!	#DIV/0!	#DIV/0!	#DIV/0!	#DIV/0!					#DIV/0!	#N/A	#N/A		#DIV/0!		2										#DIV/0!	#N/A	#N/A	#N/A	#N/A	#N/A	#N/A	#N/A	#N/A	#N/A	#N/A	#N/A
	#DIV/0!	#DIV/0!	#DIV/0!	#DIV/0!	#DIV/0!	#DIV/0!	#DIV/0!	#DIV/0!	#DIV/0!	#DIV/0!	#DIV/0!	#DIV/0!	#DIV/0!	#DIV/0!	#DIV/0!	#DIV/0!	#DIV/0!					#DIV/0!	#N/A	#N/A		#DIV/0!		2										#DIV/0!	#N/A	#N/A	#N/A	#N/A	#N/A	#N/A	#N/A	#N/A	#N/A	#N/A	#N/A
	#DIV/0!	#DIV/0!	#DIV/0!	#DIV/0!	#DIV/0!	#DIV/0!	#DIV/0!	#DIV/0!	#DIV/0!	#DIV/0!	#DIV/0!	#DIV/0!	#DIV/0!	#DIV/0!	#DIV/0!	#DIV/0!	#DIV/0!					#DIV/0!	#N/A	#N/A		#DIV/0!		2										#DIV/0!	#N/A	#N/A	#N/A	#N/A	#N/A	#N/A	#N/A	#N/A	#N/A	#N/A	#N/A
	#DIV/0!	#DIV/0!	#DIV/0!	#DIV/0!	#DIV/0!	#DIV/0!	#DIV/0!	#DIV/0!	#DIV/0!	#DIV/0!	#DIV/0!	#DIV/0!	#DIV/0!	#DIV/0!	#DIV/0!	#DIV/0!	#DIV/0!					#DIV/0!	#N/A	#N/A		#DIV/0!		2										#DIV/0!	#N/A	#N/A	#N/A	#N/A	#N/A	#N/A	#N/A	#N/A	#N/A	#N/A	#N/A
																						#DIV/0!	#N/A	#N/A		#DIV/0!		2
																						0.490798	0.490798	0.50154		0.010742	0.010742	2											0.8	1.50136	1.99386	2.48636	2.97885	#N/A	#N/A	#N/A	#N/A	#N/A	#N/A
																						0.408998	0.408998	0.403694		-0.00530413	-0.00530413	2											1.6	1.75406	2.47712	3.20019	3.92325	#N/A	#N/A	#N/A	#N/A	#N/A	#N/A
																						0.294898	0.294898	0.254653		-0.0402456	-0.0402456	2											4	2.51215	3.92692	5.34169	6.75645	#N/A	#N/A	#N/A	#N/A	#N/A	#N/A
																						0.1753	0.1753	0.157648		-0.017652	-0.017652	2											8	3.77563	6.34324	8.91085	11.4785	#N/A	#N/A	#N/A	#N/A	#N/A	#N/A
																						0.0931003	0.0931003	0.0894784		-0.00362193	-0.00362193	2											16	6.30259	11.1759	16.0492	20.9225	#N/A	#N/A	#N/A	#N/A	#N/A	#N/A
																						#DIV/0!	#N/A	#N/A		#DIV/0!		2											#N/A	#N/A	#N/A	#N/A	#N/A	#N/A	#N/A	#N/A	#N/A	#N/A	#N/A
																						#DIV/0!	#N/A	#N/A		#DIV/0!		2											#N/A	#N/A	#N/A	#N/A	#N/A	#N/A	#N/A	#N/A	#N/A	#N/A	#N/A
																						#DIV/0!	#N/A	#N/A		#DIV/0!		2											#N/A	#N/A	#N/A	#N/A	#N/A	#N/A	#N/A	#N/A	#N/A	#N/A	#N/A
																						#DIV/0!	#N/A	#N/A		#DIV/0!		2											#N/A	#N/A	#N/A	#N/A	#N/A	#N/A	#N/A	#N/A	#N/A	#N/A	#N/A
																						#DIV/0!	#N/A	#N/A		#DIV/0!		2											#N/A	#N/A	#N/A	#N/A	#N/A	#N/A	#N/A	#N/A	#N/A	#N/A	#N/A
																						#DIV/0!	#N/A	#N/A		#DIV/0!		2											#N/A	#N/A	#N/A	#N/A	#N/A	#N/A	#N/A	#N/A	#N/A	#N/A	#N/A
																						#DIV/0!	#N/A	#N/A		#DIV/0!		2											#N/A	#N/A	#N/A	#N/A	#N/A	#N/A	#N/A	#N/A	#N/A	#N/A	#N/A
																						#DIV/0!	#N/A	#N/A		#DIV/0!		2											#N/A	#N/A	#N/A	#N/A	#N/A	#N/A	#N/A	#N/A	#N/A	#N/A	#N/A
																						#DIV/0!	#N/A	#N/A		#DIV/0!		2											#N/A	#N/A	#N/A	#N/A	#N/A	#N/A	#N/A	#N/A	#N/A	#N/A	#N/A
																						#DIV/0!	#N/A	#N/A		#DIV/0!		2											#N/A	#N/A	#N/A	#N/A	#N/A	#N/A	#N/A	#N/A	#N/A	#N/A	#N/A
																						0.426403	0.426403	0.402195		-0.0242081	-0.0242081	2
																						0.329696	0.329696	0.312481		-0.0172142	-0.0172142	2												0.661201	0.490798	0.426403	0.338983	#DIV/0!	#DIV/0!	#DIV/0!	#DIV/0!	#DIV/0!	#DIV/0!
																						0.1924	0.1924	0.187207		-0.00519339	-0.00519339	2												0.572607	0.408998	0.329696	0.198299	#DIV/0!	#DIV/0!	#DIV/0!	#DIV/0!	#DIV/0!	#DIV/0!
																						0.1027	0.1027	0.112223		0.0095228	0.0095228	2												0.3747	0.294898	0.1924	0.129799	#DIV/0!	#DIV/0!	#DIV/0!	#DIV/0!	#DIV/0!	#DIV/0!
																						0.0560356	0.0560356	0.0623085		0.00627293	0.00627293	2												0.258498	0.1753	0.1027	0.0742997	#DIV/0!	#DIV/0!	#DIV/0!	#DIV/0!	#DIV/0!	#DIV/0!
																						#DIV/0!	#N/A	#N/A		#DIV/0!		2												0.159701	0.0931003	0.0560356	0.0344828	#DIV/0!	#DIV/0!	#DIV/0!	#DIV/0!	#DIV/0!	#DIV/0!
																						#DIV/0!	#N/A	#N/A		#DIV/0!		2												#DIV/0!	#DIV/0!	#DIV/0!	#DIV/0!	#DIV/0!	#DIV/0!	#DIV/0!	#DIV/0!	#DIV/0!	#DIV/0!
																						#DIV/0!	#N/A	#N/A		#DIV/0!		2												#DIV/0!	#DIV/0!	#DIV/0!	#DIV/0!	#DIV/0!	#DIV/0!	#DIV/0!	#DIV/0!	#DIV/0!	#DIV/0!
																						#DIV/0!	#N/A	#N/A		#DIV/0!		2												#DIV/0!	#DIV/0!	#DIV/0!	#DIV/0!	#DIV/0!	#DIV/0!	#DIV/0!	#DIV/0!	#DIV/0!	#DIV/0!
																						#DIV/0!	#N/A	#N/A		#DIV/0!		2												#DIV/0!	#DIV/0!	#DIV/0!	#DIV/0!	#DIV/0!	#DIV/0!	#DIV/0!	#DIV/0!	#DIV/0!	#DIV/0!
																						#DIV/0!	#N/A	#N/A		#DIV/0!		2												#DIV/0!	#DIV/0!	#DIV/0!	#DIV/0!	#DIV/0!	#DIV/0!	#DIV/0!	#DIV/0!	#DIV/0!	#DIV/0!
																						#DIV/0!	#N/A	#N/A		#DIV/0!		2												#DIV/0!	#DIV/0!	#DIV/0!	#DIV/0!	#DIV/0!	#DIV/0!	#DIV/0!	#DIV/0!	#DIV/0!	#DIV/0!
																						#DIV/0!	#N/A	#N/A		#DIV/0!		2												#DIV/0!	#DIV/0!	#DIV/0!	#DIV/0!	#DIV/0!	#DIV/0!	#DIV/0!	#DIV/0!	#DIV/0!	#DIV/0!
																						#DIV/0!	#N/A	#N/A		#DIV/0!		2												#DIV/0!	#DIV/0!	#DIV/0!	#DIV/0!	#DIV/0!	#DIV/0!	#DIV/0!	#DIV/0!	#DIV/0!	#DIV/0!
																						#DIV/0!	#N/A	#N/A		#DIV/0!		2												#DIV/0!	#DIV/0!	#DIV/0!	#DIV/0!	#DIV/0!	#DIV/0!	#DIV/0!	#DIV/0!	#DIV/0!	#DIV/0!
																						0.338983	0.338983	0.335699		-0.00328358	-0.00328358	2												#DIV/0!	#DIV/0!	#DIV/0!	#DIV/0!	#DIV/0!	#DIV/0!	#DIV/0!	#DIV/0!	#DIV/0!	#DIV/0!
																						0.198299	0.198299	0.25489		0.0565918	0.0565918	2
																						0.129799	0.129799	0.148007		0.0182073	0.0182073	2												1/s	0	0.05	0.1	0.15	0	0	0	0	0
																						0.0742997	0.0742997	0.0871197		0.01282	0.01282	2											1	0.8	1.50136	1.99386	2.48636	2.97885	#N/A	#N/A	#N/A	#N/A	#N/A
																						0.0344828	0.0344828	0.0477955		0.0133128	0.0133128	2											2	1.6	1.75406	2.47712	3.20019	3.92325	#N/A	#N/A	#N/A	#N/A	#N/A
																						#DIV/0!	#N/A	#N/A		#DIV/0!		2											3	4	2.51215	3.92692	5.34169	6.75645	#N/A	#N/A	#N/A	#N/A	#N/A
																						#DIV/0!	#N/A	#N/A		#DIV/0!		2											4	8	3.77563	6.34324	8.91085	11.4785	#N/A	#N/A	#N/A	#N/A	#N/A
																						#DIV/0!	#N/A	#N/A		#DIV/0!		2											5	16	6.30259	11.1759	16.0492	20.9225	#N/A	#N/A	#N/A	#N/A	#N/A
																						#DIV/0!	#N/A	#N/A		#DIV/0!		2											6	#N/A	#N/A	#N/A	#N/A	#N/A	#N/A	#N/A	#N/A	#N/A	#N/A
																						#DIV/0!	#N/A	#N/A		#DIV/0!		2											7	#N/A	#N/A	#N/A	#N/A	#N/A	#N/A	#N/A	#N/A	#N/A	#N/A
																						#DIV/0!	#N/A	#N/A		#DIV/0!		2											8	#N/A	#N/A	#N/A	#N/A	#N/A	#N/A	#N/A	#N/A	#N/A	#N/A
																						#DIV/0!	#N/A	#N/A		#DIV/0!		2											9	#N/A	#N/A	#N/A	#N/A	#N/A	#N/A	#N/A	#N/A	#N/A	#N/A
																						#DIV/0!	#N/A	#N/A		#DIV/0!		2											10	#N/A	#N/A	#N/A	#N/A	#N/A	#N/A	#N/A	#N/A	#N/A	#N/A
																						#DIV/0!	#N/A	#N/A		#DIV/0!		2											11	#N/A	#N/A	#N/A	#N/A	#N/A	#N/A	#N/A	#N/A	#N/A	#N/A
																						#DIV/0!	#N/A	#N/A		#DIV/0!		2											12	#N/A	#N/A	#N/A	#N/A	#N/A	#N/A	#N/A	#N/A	#N/A	#N/A
																						#DIV/0!	#N/A	#N/A		#DIV/0!		2											13	#N/A	#N/A	#N/A	#N/A	#N/A	#N/A	#N/A	#N/A	#N/A	#N/A
																						#DIV/0!	#N/A	#N/A		#DIV/0!		2											14	#N/A	#N/A	#N/A	#N/A	#N/A	#N/A	#N/A	#N/A	#N/A	#N/A
																						#DIV/0!	#N/A	#N/A		#DIV/0!		2											15	#N/A	#N/A	#N/A	#N/A	#N/A	#N/A	#N/A	#N/A	#N/A	#N/A
																						#DIV/0!	#N/A	#N/A		#DIV/0!		2
																						#DIV/0!	#N/A	#N/A		#DIV/0!		2
																						#DIV/0!	#N/A	#N/A		#DIV/0!		2
																						#DIV/0!	#N/A	#N/A		#DIV/0!		2
																						#DIV/0!	#N/A	#N/A		#DIV/0!		2
																						#DIV/0!	#N/A	#N/A		#DIV/0!		2
																						#DIV/0!	#N/A	#N/A		#DIV/0!		2
																						#DIV/0!	#N/A	#N/A		#DIV/0!		2
																						#DIV/0!	#N/A	#N/A		#DIV/0!		2
																						#DIV/0!	#N/A	#N/A		#DIV/0!		2
																						#DIV/0!	#N/A	#N/A		#DIV/0!		2
																						#DIV/0!	#N/A	#N/A		#DIV/0!		2
																						#DIV/0!	#N/A	#N/A		#DIV/0!		2
																						#DIV/0!	#N/A	#N/A		#DIV/0!		2
																						#DIV/0!	#N/A	#N/A		#DIV/0!		2
																						#DIV/0!	#N/A	#N/A		#DIV/0!		2
																						#DIV/0!	#N/A	#N/A		#DIV/0!		2
																						#DIV/0!	#N/A	#N/A		#DIV/0!		2
																						#DIV/0!	#N/A	#N/A		#DIV/0!		2
																						#DIV/0!	#N/A	#N/A		#DIV/0!		2
																						#DIV/0!	#N/A	#N/A		#DIV/0!		2
																						#DIV/0!	#N/A	#N/A		#DIV/0!		2
																						#DIV/0!	#N/A	#N/A		#DIV/0!		2
																						#DIV/0!	#N/A	#N/A		#DIV/0!		2
																						#DIV/0!	#N/A	#N/A		#DIV/0!		2
																						#DIV/0!	#N/A	#N/A		#DIV/0!		2
																						#DIV/0!	#N/A	#N/A		#DIV/0!		2
																						#DIV/0!	#N/A	#N/A		#DIV/0!		2
																						#DIV/0!	#N/A	#N/A		#DIV/0!		2
																						#DIV/0!	#N/A	#N/A		#DIV/0!		2
																						#DIV/0!	#N/A	#N/A		#DIV/0!		2
																						#DIV/0!	#N/A	#N/A		#DIV/0!		2
																						#DIV/0!	#N/A	#N/A		#DIV/0!		2
																						#DIV/0!	#N/A	#N/A		#DIV/0!		2
																						#DIV/0!	#N/A	#N/A		#DIV/0!		2
																						#DIV/0!	#N/A	#N/A		#DIV/0!		2
																						#DIV/0!	#N/A	#N/A		#DIV/0!		2
																						#DIV/0!	#N/A	#N/A		#DIV/0!		2
																						#DIV/0!	#N/A	#N/A		#DIV/0!		2
																						#DIV/0!	#N/A	#N/A		#DIV/0!		2
																						#DIV/0!	#N/A	#N/A		#DIV/0!		2
																						#DIV/0!	#N/A	#N/A		#DIV/0!		2
																						#DIV/0!	#N/A	#N/A		#DIV/0!		2
																						#DIV/0!	#N/A	#N/A		#DIV/0!		2
																						#DIV/0!	#N/A	#N/A		#DIV/0!		2
																						#DIV/0!	#N/A	#N/A		#DIV/0!		2
																						#DIV/0!	#N/A	#N/A		#DIV/0!		2
																						#DIV/0!	#N/A	#N/A		#DIV/0!		2
																						#DIV/0!	#N/A	#N/A		#DIV/0!		2
																						#DIV/0!	#N/A	#N/A		#DIV/0!		2
																						#DIV/0!	#N/A	#N/A		#DIV/0!		2
																						#DIV/0!	#N/A	#N/A		#DIV/0!		2
																						#DIV/0!	#N/A	#N/A		#DIV/0!		2
																						#DIV/0!	#N/A	#N/A		#DIV/0!		2
																						#DIV/0!	#N/A	#N/A		#DIV/0!		2
																						#DIV/0!	#N/A	#N/A		#DIV/0!		2
																						#DIV/0!	#N/A	#N/A		#DIV/0!		2
																						#DIV/0!	#N/A	#N/A		#DIV/0!		2
																						#DIV/0!	#N/A	#N/A		#DIV/0!		2
																						#DIV/0!	#N/A	#N/A		#DIV/0!		2
																						#DIV/0!	#N/A	#N/A		#DIV/0!		2
																						#DIV/0!	#N/A	#N/A		#DIV/0!		2
																						#DIV/0!	#N/A	#N/A		#DIV/0!		2
																						#DIV/0!	#N/A	#N/A		#DIV/0!		2
																						#DIV/0!	#N/A	#N/A		#DIV/0!		2
																						#DIV/0!	#N/A	#N/A		#DIV/0!		2
																						#DIV/0!	#N/A	#N/A		#DIV/0!		2
																						#DIV/0!	#N/A	#N/A		#DIV/0!		2
																						#DIV/0!	#N/A	#N/A		#DIV/0!		2
																						#DIV/0!	#N/A	#N/A		#DIV/0!		2
																						#DIV/0!	#N/A	#N/A		#DIV/0!		2
																						#DIV/0!	#N/A	#N/A		#DIV/0!		2
																						#DIV/0!	#N/A	#N/A		#DIV/0!		2
																						#DIV/0!	#N/A	#N/A		#DIV/0!		2
																						#DIV/0!	#N/A	#N/A		#DIV/0!		2
																						#DIV/0!	#N/A	#N/A		#DIV/0!		2
																						#DIV/0!	#N/A	#N/A		#DIV/0!		2
																						#DIV/0!	#N/A	#N/A		#DIV/0!		2
																						#DIV/0!	#N/A	#N/A		#DIV/0!		2
																						#DIV/0!	#N/A	#N/A		#DIV/0!		2
																						#DIV/0!	#N/A	#N/A		#DIV/0!		2
																						#DIV/0!	#N/A	#N/A		#DIV/0!		2
																						#DIV/0!	#N/A	#N/A		#DIV/0!		2
																						#DIV/0!	#N/A	#N/A		#DIV/0!		2
																						#DIV/0!	#N/A	#N/A		#DIV/0!		2
																						#DIV/0!	#N/A	#N/A		#DIV/0!		2
																						#DIV/0!	#N/A	#N/A		#DIV/0!		2
																						#DIV/0!	#N/A	#N/A		#DIV/0!		2
																						#DIV/0!	#N/A	#N/A		#DIV/0!		2
																						#DIV/0!	#N/A	#N/A		#DIV/0!		2
																						#DIV/0!	#N/A	#N/A		#DIV/0!		2
																						#DIV/0!	#N/A	#N/A		#DIV/0!		2
																						#DIV/0!	#N/A	#N/A		#DIV/0!		2
																						#DIV/0!	#N/A	#N/A		#DIV/0!		2
																						#DIV/0!	#N/A	#N/A		#DIV/0!		2
																						#DIV/0!	#N/A	#N/A		#DIV/0!		2
																						#DIV/0!	#N/A	#N/A		#DIV/0!		2
																						#DIV/0!	#N/A	#N/A		#DIV/0!		2
																						#DIV/0!	#N/A	#N/A		#DIV/0!		2
																						#DIV/0!	#N/A	#N/A		#DIV/0!		2
																						#DIV/0!	#N/A	#N/A		#DIV/0!		2
																						#DIV/0!	#N/A	#N/A		#DIV/0!		2
																						#DIV/0!	#N/A	#N/A		#DIV/0!		2
																						#DIV/0!	#N/A	#N/A		#DIV/0!		2
																						#DIV/0!	#N/A	#N/A		#DIV/0!		2
																						#DIV/0!	#N/A	#N/A		#DIV/0!		2
																						#DIV/0!	#N/A	#N/A		#DIV/0!		2
																						#DIV/0!	#N/A	#N/A		#DIV/0!		2
																						#DIV/0!	#N/A	#N/A		#DIV/0!		2
																						#DIV/0!	#N/A	#N/A		#DIV/0!		2
																						#DIV/0!	#N/A	#N/A		#DIV/0!		2
																						#DIV/0!	#N/A	#N/A		#DIV/0!		2
																						#DIV/0!	#N/A	#N/A		#DIV/0!		2
																						#DIV/0!	#N/A	#N/A		#DIV/0!		2
																						#DIV/0!	#N/A	#N/A		#DIV/0!		2
																						#DIV/0!	#N/A	#N/A		#DIV/0!		2
																						#DIV/0!	#N/A	#N/A		#DIV/0!		2
																						#DIV/0!	#N/A	#N/A		#DIV/0!		2
																						#DIV/0!	#N/A	#N/A		#DIV/0!		2
																						#DIV/0!	#N/A	#N/A		#DIV/0!		2
																						#DIV/0!	#N/A	#N/A		#DIV/0!		2
																						#DIV/0!	#N/A	#N/A		#DIV/0!		2
																						#DIV/0!	#N/A	#N/A		#DIV/0!		2
																						#DIV/0!	#N/A	#N/A		#DIV/0!		2
																						#DIV/0!	#N/A	#N/A		#DIV/0!		2
																						#DIV/0!	#N/A	#N/A		#DIV/0!		2
																						#DIV/0!	#N/A	#N/A		#DIV/0!		2
																						#DIV/0!	#N/A	#N/A		#DIV/0!		2
																						#DIV/0!	#N/A	#N/A		#DIV/0!		2
																						#DIV/0!	#N/A	#N/A		#DIV/0!		2
																						#DIV/0!	#N/A	#N/A		#DIV/0!		2
																						#DIV/0!	#N/A	#N/A		#DIV/0!		2
																						#DIV/0!	#N/A	#N/A		#DIV/0!		2
																						#DIV/0!	#N/A	#N/A		#DIV/0!		2
																						#DIV/0!	#N/A	#N/A		#DIV/0!		2
																						#DIV/0!	#N/A	#N/A		#DIV/0!		2
																						#DIV/0!	#N/A	#N/A		#DIV/0!		2
																						#DIV/0!	#N/A	#N/A		#DIV/0!		2
																						#DIV/0!	#N/A	#N/A		#DIV/0!		2
																						#DIV/0!	#N/A	#N/A		#DIV/0!		2
																						#DIV/0!	#N/A	#N/A		#DIV/0!		2
																						#DIV/0!	#N/A	#N/A		#DIV/0!		2
																						#DIV/0!	#N/A	#N/A		#DIV/0!		2
																						#DIV/0!	#N/A	#N/A		#DIV/0!		2
																						#DIV/0!	#N/A	#N/A		#DIV/0!		2
																						#DIV/0!	#N/A	#N/A		#DIV/0!		2
																						#DIV/0!	#N/A	#N/A		#DIV/0!		2
																						#DIV/0!	#N/A	#N/A		#DIV/0!		2
																						#DIV/0!	#N/A	#N/A		#DIV/0!		2
																						#DIV/0!	#N/A	#N/A		#DIV/0!		2
																						#DIV/0!	#N/A	#N/A		#DIV/0!		2
																						#DIV/0!	#N/A	#N/A		#DIV/0!		2
																						#DIV/0!	#N/A	#N/A		#DIV/0!		2
																						#DIV/0!	#N/A	#N/A		#DIV/0!		2
																						#DIV/0!	#N/A	#N/A		#DIV/0!		2
																						#DIV/0!	#N/A	#N/A		#DIV/0!		2
																						#DIV/0!	#N/A	#N/A		#DIV/0!		2
																						#DIV/0!	#N/A	#N/A		#DIV/0!		2
																						#DIV/0!	#N/A	#N/A		#DIV/0!		2
																						#DIV/0!	#N/A	#N/A		#DIV/0!		2
																						#DIV/0!	#N/A	#N/A		#DIV/0!		2
																						#DIV/0!	#N/A	#N/A		#DIV/0!		2
																						#DIV/0!	#N/A	#N/A		#DIV/0!		2
																						#DIV/0!	#N/A	#N/A		#DIV/0!		2
																						#DIV/0!	#N/A	#N/A		#DIV/0!		2
																						#DIV/0!	#N/A	#N/A		#DIV/0!		2
																						#DIV/0!	#N/A	#N/A		#DIV/0!		2
																						#DIV/0!	#N/A	#N/A		#DIV/0!		2
																						#DIV/0!	#N/A	#N/A		#DIV/0!		2
																						#DIV/0!	#N/A	#N/A		#DIV/0!		2
																						#DIV/0!	#N/A	#N/A		#DIV/0!		2
																						#DIV/0!	#N/A	#N/A		#DIV/0!		2
																						#DIV/0!	#N/A	#N/A		#DIV/0!		2
																						#DIV/0!	#N/A	#N/A		#DIV/0!		2
																						#DIV/0!	#N/A	#N/A		#DIV/0!		2
																						#DIV/0!	#N/A	#N/A		#DIV/0!		2
																						#DIV/0!	#N/A	#N/A		#DIV/0!		2
[truncated: 54 more columns]

## Sheet: Partial Uncompetitive
																	((V_max+(V2*[I])/K_i )*[S])/(K_s+((1+[I])/K_i )*[S] )						Calculated values
		No Inhibitor	[I]1	[I]2	[I]3	[I]4	[I]5	[I]6	[I]7	[I]8	[I]9	[I]10	[I]11	[I]12	[I]13	[I]14	[I]15			0.334344	#DIV/0!	#DIV/0!	No Inhibitor	[I]1	[I]2	[I]3	[I]4	[I]5	[I]6	[I]7	[I]8	[I]9	[I]10	[I]11	[I]12	[I]13	[I]14	[I]15
		0	0.05	0.1	0.15	0	0	0	0	0	0	0	0	0	0	0	0	Km	Vmax	Ki	V2	0	0	0.05	0.1	0.15	0	0	0	0	0	0	0	0	0	0	0	0
[S]1	1.25	0.661201	0.490798	0.426403	0.338983	0	0	0	0	0	0	0	0	0	0	0	0	0.417931	0.723451	0.898385	0		0.49981	0.481304	0.464119	0.448119	#DIV/0!	#DIV/0!	#DIV/0!	#DIV/0!	#DIV/0!	#DIV/0!	#DIV/0!	#DIV/0!	#DIV/0!	#DIV/0!	#DIV/0!	#DIV/0!		0.49981	0.481304	0.464119	0.448119	0	0	0	0	0	0
[S]2	0.625	0.572607	0.408998	0.329696	0.198299	0	0	0	0	0	0	0	0	0	0	0	0						0.406023	0.393725	0.38215	0.371236	#DIV/0!	#DIV/0!	#DIV/0!	#DIV/0!	#DIV/0!	#DIV/0!	#DIV/0!	#DIV/0!	#DIV/0!	#DIV/0!	#DIV/0!	#DIV/0!		0.406023	0.393725	0.38215	0.371236	0	0	0	0	0	0
[S]3	0.25	0.3747	0.294898	0.1924	0.129799	0	0	0	0	0	0	0	0	0	0	0	0						0.259783	0.254693	0.249798	0.245088	#DIV/0!	#DIV/0!	#DIV/0!	#DIV/0!	#DIV/0!	#DIV/0!	#DIV/0!	#DIV/0!	#DIV/0!	#DIV/0!	#DIV/0!	#DIV/0!		0.259783	0.254693	0.249798	0.245088	0	0	0	0	0	0
[S]4	0.125	0.258498	0.1753	0.1027	0.0742997	0	0	0	0	0	0	0	0	0	0	0	0						0.162334	0.160332	0.158379	0.156472	#DIV/0!	#DIV/0!	#DIV/0!	#DIV/0!	#DIV/0!	#DIV/0!	#DIV/0!	#DIV/0!	#DIV/0!	#DIV/0!	#DIV/0!	#DIV/0!		0.162334	0.160332	0.158379	0.156472	0	0	0	0	0	0
[S]5	0.0625	0.159701	0.0931003	0.0560356	0.0344828	0	0	0	0	0	0	0	0	0	0	0	0						0.0927502	0.0920931	0.0914452	0.0908064	#DIV/0!	#DIV/0!	#DIV/0!	#DIV/0!	#DIV/0!	#DIV/0!	#DIV/0!	#DIV/0!	#DIV/0!	#DIV/0!	#DIV/0!	#DIV/0!		0.0927502	0.0920931	0.0914452	0.0908064	0	0	0	0	0	0
[S]6	0	0	0	0	0	0	0	0	0	0	0	0	0	0	0	0	0						#DIV/0!	#DIV/0!	#DIV/0!	#DIV/0!	#DIV/0!	#DIV/0!	#DIV/0!	#DIV/0!	#DIV/0!	#DIV/0!	#DIV/0!	#DIV/0!	#DIV/0!	#DIV/0!	#DIV/0!	#DIV/0!		0	0	0	0	0	0	0	0	0	0
[S]7	0	0	0	0	0	0	0	0	0	0	0	0	0	0	0	0	0						#DIV/0!	#DIV/0!	#DIV/0!	#DIV/0!	#DIV/0!	#DIV/0!	#DIV/0!	#DIV/0!	#DIV/0!	#DIV/0!	#DIV/0!	#DIV/0!	#DIV/0!	#DIV/0!	#DIV/0!	#DIV/0!		0	0	0	0	0	0	0	0	0	0
[S]8	0	0	0	0	0	0	0	0	0	0	0	0	0	0	0	0	0			Sum R2	0.159754		#DIV/0!	#DIV/0!	#DIV/0!	#DIV/0!	#DIV/0!	#DIV/0!	#DIV/0!	#DIV/0!	#DIV/0!	#DIV/0!	#DIV/0!	#DIV/0!	#DIV/0!	#DIV/0!	#DIV/0!	#DIV/0!		0	0	0	0	0	0	0	0	0	0
[S]9	0	0	0	0	0	0	0	0	0	0	0	0	0	0	0	0	0			Sum residuals %	6.32271		#DIV/0!	#DIV/0!	#DIV/0!	#DIV/0!	#DIV/0!	#DIV/0!	#DIV/0!	#DIV/0!	#DIV/0!	#DIV/0!	#DIV/0!	#DIV/0!	#DIV/0!	#DIV/0!	#DIV/0!	#DIV/0!		0	0	0	0	0	0	0	0	0	0
[S]10	0	0	0	0	0	0	0	0	0	0	0	0	0	0	0	0	0						#DIV/0!	#DIV/0!	#DIV/0!	#DIV/0!	#DIV/0!	#DIV/0!	#DIV/0!	#DIV/0!	#DIV/0!	#DIV/0!	#DIV/0!	#DIV/0!	#DIV/0!	#DIV/0!	#DIV/0!	#DIV/0!		0	0	0	0	0	0	0	0	0	0
[S]11	0	0	0	0	0	0	0	0	0	0	0	0	0	0	0	0	0						#DIV/0!	#DIV/0!	#DIV/0!	#DIV/0!	#DIV/0!	#DIV/0!	#DIV/0!	#DIV/0!	#DIV/0!	#DIV/0!	#DIV/0!	#DIV/0!	#DIV/0!	#DIV/0!	#DIV/0!	#DIV/0!		0	0	0	0	0	0	0	0	0	0
[S]12	0	0	0	0	0	0	0	0	0	0	0	0	0	0	0	0	0						#DIV/0!	#DIV/0!	#DIV/0!	#DIV/0!	#DIV/0!	#DIV/0!	#DIV/0!	#DIV/0!	#DIV/0!	#DIV/0!	#DIV/0!	#DIV/0!	#DIV/0!	#DIV/0!	#DIV/0!	#DIV/0!		0	0	0	0	0	0	0	0	0	0
[S]13	0	0	0	0	0	0	0	0	0	0	0	0	0	0	0	0	0						#DIV/0!	#DIV/0!	#DIV/0!	#DIV/0!	#DIV/0!	#DIV/0!	#DIV/0!	#DIV/0!	#DIV/0!	#DIV/0!	#DIV/0!	#DIV/0!	#DIV/0!	#DIV/0!	#DIV/0!	#DIV/0!		0	0	0	0	0	0	0	0	0	0
[S]14	0	0	0	0	0	0	0	0	0	0	0	0	0	0	0	0	0						#DIV/0!	#DIV/0!	#DIV/0!	#DIV/0!	#DIV/0!	#DIV/0!	#DIV/0!	#DIV/0!	#DIV/0!	#DIV/0!	#DIV/0!	#DIV/0!	#DIV/0!	#DIV/0!	#DIV/0!	#DIV/0!		0	0	0	0	0	0	0	0	0	0
[S]15	0	0	0	0	0	0	0	0	0	0	0	0	0	0	0	0	0						#DIV/0!	#DIV/0!	#DIV/0!	#DIV/0!	#DIV/0!	#DIV/0!	#DIV/0!	#DIV/0!	#DIV/0!	#DIV/0!	#DIV/0!	#DIV/0!	#DIV/0!	#DIV/0!	#DIV/0!	#DIV/0!		0	0	0	0	0	0	0	0	0	0
	1	1	1	1	1	#DIV/0!	#DIV/0!	#DIV/0!	#DIV/0!	#DIV/0!	#DIV/0!	#DIV/0!	#DIV/0!	#DIV/0!	#DIV/0!	#DIV/0!	#DIV/0!																					1.25	1.25	0.49981	0.481304	0.464119	0.448119	#N/A	#N/A	#N/A	#N/A	#N/A	#N/A
	1	1	1	1	1	#DIV/0!	#DIV/0!	#DIV/0!	#DIV/0!	#DIV/0!	#DIV/0!	#DIV/0!	#DIV/0!	#DIV/0!	#DIV/0!	#DIV/0!	#DIV/0!					0.661201	0.661201	0.49981		-0.161391	-0.161391	3										0.625	0.625	0.406023	0.393725	0.38215	0.371236	#N/A	#N/A	#N/A	#N/A	#N/A	#N/A
	1	1	1	1	1	#DIV/0!	#DIV/0!	#DIV/0!	#DIV/0!	#DIV/0!	#DIV/0!	#DIV/0!	#DIV/0!	#DIV/0!	#DIV/0!	#DIV/0!	#DIV/0!					0.572607	0.572607	0.406023		-0.166583	-0.166583	3										0.25	0.25	0.259783	0.254693	0.249798	0.245088	#N/A	#N/A	#N/A	#N/A	#N/A	#N/A
	1	1	1	1	1	#DIV/0!	#DIV/0!	#DIV/0!	#DIV/0!	#DIV/0!	#DIV/0!	#DIV/0!	#DIV/0!	#DIV/0!	#DIV/0!	#DIV/0!	#DIV/0!					0.3747	0.3747	0.259783		-0.114917	-0.114917	3										0.125	0.125	0.162334	0.160332	0.158379	0.156472	#N/A	#N/A	#N/A	#N/A	#N/A	#N/A
	1	1	1	1	1	#DIV/0!	#DIV/0!	#DIV/0!	#DIV/0!	#DIV/0!	#DIV/0!	#DIV/0!	#DIV/0!	#DIV/0!	#DIV/0!	#DIV/0!	#DIV/0!					0.258498	0.258498	0.162334		-0.0961638	-0.0961638	3										0.0625	0.0625	0.0927502	0.0920931	0.0914452	0.0908064	#N/A	#N/A	#N/A	#N/A	#N/A	#N/A
	#DIV/0!	#DIV/0!	#DIV/0!	#DIV/0!	#DIV/0!	#DIV/0!	#DIV/0!	#DIV/0!	#DIV/0!	#DIV/0!	#DIV/0!	#DIV/0!	#DIV/0!	#DIV/0!	#DIV/0!	#DIV/0!	#DIV/0!					0.159701	0.159701	0.0927502		-0.0669508	-0.0669508	3										#DIV/0!	#N/A	#N/A	#N/A	#N/A	#N/A	#N/A	#N/A	#N/A	#N/A	#N/A	#N/A
	#DIV/0!	#DIV/0!	#DIV/0!	#DIV/0!	#DIV/0!	#DIV/0!	#DIV/0!	#DIV/0!	#DIV/0!	#DIV/0!	#DIV/0!	#DIV/0!	#DIV/0!	#DIV/0!	#DIV/0!	#DIV/0!	#DIV/0!					#DIV/0!	#N/A	#N/A		#DIV/0!		3										#DIV/0!	#N/A	#N/A	#N/A	#N/A	#N/A	#N/A	#N/A	#N/A	#N/A	#N/A	#N/A
	#DIV/0!	#DIV/0!	#DIV/0!	#DIV/0!	#DIV/0!	#DIV/0!	#DIV/0!	#DIV/0!	#DIV/0!	#DIV/0!	#DIV/0!	#DIV/0!	#DIV/0!	#DIV/0!	#DIV/0!	#DIV/0!	#DIV/0!					#DIV/0!	#N/A	#N/A		#DIV/0!		3										#DIV/0!	#N/A	#N/A	#N/A	#N/A	#N/A	#N/A	#N/A	#N/A	#N/A	#N/A	#N/A
	#DIV/0!	#DIV/0!	#DIV/0!	#DIV/0!	#DIV/0!	#DIV/0!	#DIV/0!	#DIV/0!	#DIV/0!	#DIV/0!	#DIV/0!	#DIV/0!	#DIV/0!	#DIV/0!	#DIV/0!	#DIV/0!	#DIV/0!					#DIV/0!	#N/A	#N/A		#DIV/0!		3										#DIV/0!	#N/A	#N/A	#N/A	#N/A	#N/A	#N/A	#N/A	#N/A	#N/A	#N/A	#N/A
	#DIV/0!	#DIV/0!	#DIV/0!	#DIV/0!	#DIV/0!	#DIV/0!	#DIV/0!	#DIV/0!	#DIV/0!	#DIV/0!	#DIV/0!	#DIV/0!	#DIV/0!	#DIV/0!	#DIV/0!	#DIV/0!	#DIV/0!					#DIV/0!	#N/A	#N/A		#DIV/0!		3										#DIV/0!	#N/A	#N/A	#N/A	#N/A	#N/A	#N/A	#N/A	#N/A	#N/A	#N/A	#N/A
	#DIV/0!	#DIV/0!	#DIV/0!	#DIV/0!	#DIV/0!	#DIV/0!	#DIV/0!	#DIV/0!	#DIV/0!	#DIV/0!	#DIV/0!	#DIV/0!	#DIV/0!	#DIV/0!	#DIV/0!	#DIV/0!	#DIV/0!					#DIV/0!	#N/A	#N/A		#DIV/0!		3										#DIV/0!	#N/A	#N/A	#N/A	#N/A	#N/A	#N/A	#N/A	#N/A	#N/A	#N/A	#N/A
	#DIV/0!	#DIV/0!	#DIV/0!	#DIV/0!	#DIV/0!	#DIV/0!	#DIV/0!	#DIV/0!	#DIV/0!	#DIV/0!	#DIV/0!	#DIV/0!	#DIV/0!	#DIV/0!	#DIV/0!	#DIV/0!	#DIV/0!					#DIV/0!	#N/A	#N/A		#DIV/0!		3										#DIV/0!	#N/A	#N/A	#N/A	#N/A	#N/A	#N/A	#N/A	#N/A	#N/A	#N/A	#N/A
	#DIV/0!	#DIV/0!	#DIV/0!	#DIV/0!	#DIV/0!	#DIV/0!	#DIV/0!	#DIV/0!	#DIV/0!	#DIV/0!	#DIV/0!	#DIV/0!	#DIV/0!	#DIV/0!	#DIV/0!	#DIV/0!	#DIV/0!					#DIV/0!	#N/A	#N/A		#DIV/0!		3										#DIV/0!	#N/A	#N/A	#N/A	#N/A	#N/A	#N/A	#N/A	#N/A	#N/A	#N/A	#N/A
	#DIV/0!	#DIV/0!	#DIV/0!	#DIV/0!	#DIV/0!	#DIV/0!	#DIV/0!	#DIV/0!	#DIV/0!	#DIV/0!	#DIV/0!	#DIV/0!	#DIV/0!	#DIV/0!	#DIV/0!	#DIV/0!	#DIV/0!					#DIV/0!	#N/A	#N/A		#DIV/0!		3										#DIV/0!	#N/A	#N/A	#N/A	#N/A	#N/A	#N/A	#N/A	#N/A	#N/A	#N/A	#N/A
	#DIV/0!	#DIV/0!	#DIV/0!	#DIV/0!	#DIV/0!	#DIV/0!	#DIV/0!	#DIV/0!	#DIV/0!	#DIV/0!	#DIV/0!	#DIV/0!	#DIV/0!	#DIV/0!	#DIV/0!	#DIV/0!	#DIV/0!					#DIV/0!	#N/A	#N/A		#DIV/0!		3										#DIV/0!	#N/A	#N/A	#N/A	#N/A	#N/A	#N/A	#N/A	#N/A	#N/A	#N/A	#N/A
																						#DIV/0!	#N/A	#N/A		#DIV/0!		3
																						0.490798	0.490798	0.481304		-0.00949401	-0.00949401	3											0.8	2.00076	2.07769	2.15462	2.23155	#N/A	#N/A	#N/A	#N/A	#N/A	#N/A
																						0.408998	0.408998	0.393725		-0.0152728	-0.0152728	3											1.6	2.46291	2.53984	2.61677	2.6937	#N/A	#N/A	#N/A	#N/A	#N/A	#N/A
																						0.294898	0.294898	0.254693		-0.0402054	-0.0402054	3											4	3.84937	3.9263	4.00323	4.08016	#N/A	#N/A	#N/A	#N/A	#N/A	#N/A
																						0.1753	0.1753	0.160332		-0.0149682	-0.0149682	3											8	6.16013	6.23706	6.31399	6.39092	#N/A	#N/A	#N/A	#N/A	#N/A	#N/A
																						0.0931003	0.0931003	0.0920931		-0.00100723	-0.00100723	3											16	10.7816	10.8586	10.9355	11.0124	#N/A	#N/A	#N/A	#N/A	#N/A	#N/A
																						#DIV/0!	#N/A	#N/A		#DIV/0!		3											#N/A	#N/A	#N/A	#N/A	#N/A	#N/A	#N/A	#N/A	#N/A	#N/A	#N/A
																						#DIV/0!	#N/A	#N/A		#DIV/0!		3											#N/A	#N/A	#N/A	#N/A	#N/A	#N/A	#N/A	#N/A	#N/A	#N/A	#N/A
																						#DIV/0!	#N/A	#N/A		#DIV/0!		3											#N/A	#N/A	#N/A	#N/A	#N/A	#N/A	#N/A	#N/A	#N/A	#N/A	#N/A
																						#DIV/0!	#N/A	#N/A		#DIV/0!		3											#N/A	#N/A	#N/A	#N/A	#N/A	#N/A	#N/A	#N/A	#N/A	#N/A	#N/A
																						#DIV/0!	#N/A	#N/A		#DIV/0!		3											#N/A	#N/A	#N/A	#N/A	#N/A	#N/A	#N/A	#N/A	#N/A	#N/A	#N/A
																						#DIV/0!	#N/A	#N/A		#DIV/0!		3											#N/A	#N/A	#N/A	#N/A	#N/A	#N/A	#N/A	#N/A	#N/A	#N/A	#N/A
																						#DIV/0!	#N/A	#N/A		#DIV/0!		3											#N/A	#N/A	#N/A	#N/A	#N/A	#N/A	#N/A	#N/A	#N/A	#N/A	#N/A
																						#DIV/0!	#N/A	#N/A		#DIV/0!		3											#N/A	#N/A	#N/A	#N/A	#N/A	#N/A	#N/A	#N/A	#N/A	#N/A	#N/A
																						#DIV/0!	#N/A	#N/A		#DIV/0!		3											#N/A	#N/A	#N/A	#N/A	#N/A	#N/A	#N/A	#N/A	#N/A	#N/A	#N/A
																						#DIV/0!	#N/A	#N/A		#DIV/0!		3											#N/A	#N/A	#N/A	#N/A	#N/A	#N/A	#N/A	#N/A	#N/A	#N/A	#N/A
																						0.426403	0.426403	0.464119		0.0377158	0.0377158	3
																						0.329696	0.329696	0.38215		0.0524544	0.0524544	3												0.661201	0.490798	0.426403	0.338983	#DIV/0!	#DIV/0!	#DIV/0!	#DIV/0!	#DIV/0!	#DIV/0!
																						0.1924	0.1924	0.249798		0.0573982	0.0573982	3												0.572607	0.408998	0.329696	0.198299	#DIV/0!	#DIV/0!	#DIV/0!	#DIV/0!	#DIV/0!	#DIV/0!
																						0.1027	0.1027	0.158379		0.0556785	0.0556785	3												0.3747	0.294898	0.1924	0.129799	#DIV/0!	#DIV/0!	#DIV/0!	#DIV/0!	#DIV/0!	#DIV/0!
																						0.0560356	0.0560356	0.0914452		0.0354096	0.0354096	3												0.258498	0.1753	0.1027	0.0742997	#DIV/0!	#DIV/0!	#DIV/0!	#DIV/0!	#DIV/0!	#DIV/0!
																						#DIV/0!	#N/A	#N/A		#DIV/0!		3												0.159701	0.0931003	0.0560356	0.0344828	#DIV/0!	#DIV/0!	#DIV/0!	#DIV/0!	#DIV/0!	#DIV/0!
																						#DIV/0!	#N/A	#N/A		#DIV/0!		3												#DIV/0!	#DIV/0!	#DIV/0!	#DIV/0!	#DIV/0!	#DIV/0!	#DIV/0!	#DIV/0!	#DIV/0!	#DIV/0!
																						#DIV/0!	#N/A	#N/A		#DIV/0!		3												#DIV/0!	#DIV/0!	#DIV/0!	#DIV/0!	#DIV/0!	#DIV/0!	#DIV/0!	#DIV/0!	#DIV/0!	#DIV/0!
																						#DIV/0!	#N/A	#N/A		#DIV/0!		3												#DIV/0!	#DIV/0!	#DIV/0!	#DIV/0!	#DIV/0!	#DIV/0!	#DIV/0!	#DIV/0!	#DIV/0!	#DIV/0!
																						#DIV/0!	#N/A	#N/A		#DIV/0!		3												#DIV/0!	#DIV/0!	#DIV/0!	#DIV/0!	#DIV/0!	#DIV/0!	#DIV/0!	#DIV/0!	#DIV/0!	#DIV/0!
																						#DIV/0!	#N/A	#N/A		#DIV/0!		3												#DIV/0!	#DIV/0!	#DIV/0!	#DIV/0!	#DIV/0!	#DIV/0!	#DIV/0!	#DIV/0!	#DIV/0!	#DIV/0!
																						#DIV/0!	#N/A	#N/A		#DIV/0!		3												#DIV/0!	#DIV/0!	#DIV/0!	#DIV/0!	#DIV/0!	#DIV/0!	#DIV/0!	#DIV/0!	#DIV/0!	#DIV/0!
																						#DIV/0!	#N/A	#N/A		#DIV/0!		3												#DIV/0!	#DIV/0!	#DIV/0!	#DIV/0!	#DIV/0!	#DIV/0!	#DIV/0!	#DIV/0!	#DIV/0!	#DIV/0!
																						#DIV/0!	#N/A	#N/A		#DIV/0!		3												#DIV/0!	#DIV/0!	#DIV/0!	#DIV/0!	#DIV/0!	#DIV/0!	#DIV/0!	#DIV/0!	#DIV/0!	#DIV/0!
																						#DIV/0!	#N/A	#N/A		#DIV/0!		3												#DIV/0!	#DIV/0!	#DIV/0!	#DIV/0!	#DIV/0!	#DIV/0!	#DIV/0!	#DIV/0!	#DIV/0!	#DIV/0!
																						0.338983	0.338983	0.448119		0.109136	0.109136	3												#DIV/0!	#DIV/0!	#DIV/0!	#DIV/0!	#DIV/0!	#DIV/0!	#DIV/0!	#DIV/0!	#DIV/0!	#DIV/0!
																						0.198299	0.198299	0.371236		0.172937	0.172937	3
																						0.129799	0.129799	0.245088		0.115289	0.115289	3												1/s	0	0.05	0.1	0.15	0	0	0	0	0
																						0.0742997	0.0742997	0.156472		0.0821723	0.0821723	3											1	0.8	2.00076	2.07769	2.15462	2.23155	#N/A	#N/A	#N/A	#N/A	#N/A
																						0.0344828	0.0344828	0.0908064		0.0563237	0.0563237	3											2	1.6	2.46291	2.53984	2.61677	2.6937	#N/A	#N/A	#N/A	#N/A	#N/A
																						#DIV/0!	#N/A	#N/A		#DIV/0!		3											3	4	3.84937	3.9263	4.00323	4.08016	#N/A	#N/A	#N/A	#N/A	#N/A
																						#DIV/0!	#N/A	#N/A		#DIV/0!		3											4	8	6.16013	6.23706	6.31399	6.39092	#N/A	#N/A	#N/A	#N/A	#N/A
																						#DIV/0!	#N/A	#N/A		#DIV/0!		3											5	16	10.7816	10.8586	10.9355	11.0124	#N/A	#N/A	#N/A	#N/A	#N/A
																						#DIV/0!	#N/A	#N/A		#DIV/0!		3											6	#N/A	#N/A	#N/A	#N/A	#N/A	#N/A	#N/A	#N/A	#N/A	#N/A
																						#DIV/0!	#N/A	#N/A		#DIV/0!		3											7	#N/A	#N/A	#N/A	#N/A	#N/A	#N/A	#N/A	#N/A	#N/A	#N/A
																						#DIV/0!	#N/A	#N/A		#DIV/0!		3											8	#N/A	#N/A	#N/A	#N/A	#N/A	#N/A	#N/A	#N/A	#N/A	#N/A
																						#DIV/0!	#N/A	#N/A		#DIV/0!		3											9	#N/A	#N/A	#N/A	#N/A	#N/A	#N/A	#N/A	#N/A	#N/A	#N/A
																						#DIV/0!	#N/A	#N/A		#DIV/0!		3											10	#N/A	#N/A	#N/A	#N/A	#N/A	#N/A	#N/A	#N/A	#N/A	#N/A
																						#DIV/0!	#N/A	#N/A		#DIV/0!		3											11	#N/A	#N/A	#N/A	#N/A	#N/A	#N/A	#N/A	#N/A	#N/A	#N/A
																						#DIV/0!	#N/A	#N/A		#DIV/0!		3											12	#N/A	#N/A	#N/A	#N/A	#N/A	#N/A	#N/A	#N/A	#N/A	#N/A
																						#DIV/0!	#N/A	#N/A		#DIV/0!		3											13	#N/A	#N/A	#N/A	#N/A	#N/A	#N/A	#N/A	#N/A	#N/A	#N/A
																						#DIV/0!	#N/A	#N/A		#DIV/0!		3											14	#N/A	#N/A	#N/A	#N/A	#N/A	#N/A	#N/A	#N/A	#N/A	#N/A
																						#DIV/0!	#N/A	#N/A		#DIV/0!		3											15	#N/A	#N/A	#N/A	#N/A	#N/A	#N/A	#N/A	#N/A	#N/A	#N/A
																						#DIV/0!	#N/A	#N/A		#DIV/0!		3
																						#DIV/0!	#N/A	#N/A		#DIV/0!		3
																						#DIV/0!	#N/A	#N/A		#DIV/0!		3
																						#DIV/0!	#N/A	#N/A		#DIV/0!		3
																						#DIV/0!	#N/A	#N/A		#DIV/0!		3
																						#DIV/0!	#N/A	#N/A		#DIV/0!		3
																						#DIV/0!	#N/A	#N/A		#DIV/0!		3
																						#DIV/0!	#N/A	#N/A		#DIV/0!		3
																						#DIV/0!	#N/A	#N/A		#DIV/0!		3
																						#DIV/0!	#N/A	#N/A		#DIV/0!		3
																						#DIV/0!	#N/A	#N/A		#DIV/0!		3
																						#DIV/0!	#N/A	#N/A		#DIV/0!		3
																						#DIV/0!	#N/A	#N/A		#DIV/0!		3
																						#DIV/0!	#N/A	#N/A		#DIV/0!		3
																						#DIV/0!	#N/A	#N/A		#DIV/0!		3
																						#DIV/0!	#N/A	#N/A		#DIV/0!		3
																						#DIV/0!	#N/A	#N/A		#DIV/0!		3
																						#DIV/0!	#N/A	#N/A		#DIV/0!		3
																						#DIV/0!	#N/A	#N/A		#DIV/0!		3
																						#DIV/0!	#N/A	#N/A		#DIV/0!		3
																						#DIV/0!	#N/A	#N/A		#DIV/0!		3
																						#DIV/0!	#N/A	#N/A		#DIV/0!		3
																						#DIV/0!	#N/A	#N/A		#DIV/0!		3
																						#DIV/0!	#N/A	#N/A		#DIV/0!		3
																						#DIV/0!	#N/A	#N/A		#DIV/0!		3
																						#DIV/0!	#N/A	#N/A		#DIV/0!		3
																						#DIV/0!	#N/A	#N/A		#DIV/0!		3
																						#DIV/0!	#N/A	#N/A		#DIV/0!		3
																						#DIV/0!	#N/A	#N/A		#DIV/0!		3
																						#DIV/0!	#N/A	#N/A		#DIV/0!		3
																						#DIV/0!	#N/A	#N/A		#DIV/0!		3
																						#DIV/0!	#N/A	#N/A		#DIV/0!		3
																						#DIV/0!	#N/A	#N/A		#DIV/0!		3
																						#DIV/0!	#N/A	#N/A		#DIV/0!		3
																						#DIV/0!	#N/A	#N/A		#DIV/0!		3
																						#DIV/0!	#N/A	#N/A		#DIV/0!		3
																						#DIV/0!	#N/A	#N/A		#DIV/0!		3
																						#DIV/0!	#N/A	#N/A		#DIV/0!		3
																						#DIV/0!	#N/A	#N/A		#DIV/0!		3
																						#DIV/0!	#N/A	#N/A		#DIV/0!		3
																						#DIV/0!	#N/A	#N/A		#DIV/0!		3
																						#DIV/0!	#N/A	#N/A		#DIV/0!		3
																						#DIV/0!	#N/A	#N/A		#DIV/0!		3
																						#DIV/0!	#N/A	#N/A		#DIV/0!		3
																						#DIV/0!	#N/A	#N/A		#DIV/0!		3
																						#DIV/0!	#N/A	#N/A		#DIV/0!		3
																						#DIV/0!	#N/A	#N/A		#DIV/0!		3
																						#DIV/0!	#N/A	#N/A		#DIV/0!		3
																						#DIV/0!	#N/A	#N/A		#DIV/0!		3
																						#DIV/0!	#N/A	#N/A		#DIV/0!		3
																						#DIV/0!	#N/A	#N/A		#DIV/0!		3
																						#DIV/0!	#N/A	#N/A		#DIV/0!		3
																						#DIV/0!	#N/A	#N/A		#DIV/0!		3
																						#DIV/0!	#N/A	#N/A		#DIV/0!		3
																						#DIV/0!	#N/A	#N/A		#DIV/0!		3
																						#DIV/0!	#N/A	#N/A		#DIV/0!		3
																						#DIV/0!	#N/A	#N/A		#DIV/0!		3
																						#DIV/0!	#N/A	#N/A		#DIV/0!		3
																						#DIV/0!	#N/A	#N/A		#DIV/0!		3
																						#DIV/0!	#N/A	#N/A		#DIV/0!		3
																						#DIV/0!	#N/A	#N/A		#DIV/0!		3
																						#DIV/0!	#N/A	#N/A		#DIV/0!		3
																						#DIV/0!	#N/A	#N/A		#DIV/0!		3
																						#DIV/0!	#N/A	#N/A		#DIV/0!		3
																						#DIV/0!	#N/A	#N/A		#DIV/0!		3
																						#DIV/0!	#N/A	#N/A		#DIV/0!		3
																						#DIV/0!	#N/A	#N/A		#DIV/0!		3
																						#DIV/0!	#N/A	#N/A		#DIV/0!		3
																						#DIV/0!	#N/A	#N/A		#DIV/0!		3
																						#DIV/0!	#N/A	#N/A		#DIV/0!		3
																						#DIV/0!	#N/A	#N/A		#DIV/0!		3
																						#DIV/0!	#N/A	#N/A		#DIV/0!		3
																						#DIV/0!	#N/A	#N/A		#DIV/0!		3
																						#DIV/0!	#N/A	#N/A		#DIV/0!		3
																						#DIV/0!	#N/A	#N/A		#DIV/0!		3
																						#DIV/0!	#N/A	#N/A		#DIV/0!		3
																						#DIV/0!	#N/A	#N/A		#DIV/0!		3
																						#DIV/0!	#N/A	#N/A		#DIV/0!		3
																						#DIV/0!	#N/A	#N/A		#DIV/0!		3
																						#DIV/0!	#N/A	#N/A		#DIV/0!		3
																						#DIV/0!	#N/A	#N/A		#DIV/0!		3
																						#DIV/0!	#N/A	#N/A		#DIV/0!		3
																						#DIV/0!	#N/A	#N/A		#DIV/0!		3
																						#DIV/0!	#N/A	#N/A		#DIV/0!		3
																						#DIV/0!	#N/A	#N/A		#DIV/0!		3
																						#DIV/0!	#N/A	#N/A		#DIV/0!		3
																						#DIV/0!	#N/A	#N/A		#DIV/0!		3
																						#DIV/0!	#N/A	#N/A		#DIV/0!		3
																						#DIV/0!	#N/A	#N/A		#DIV/0!		3
																						#DIV/0!	#N/A	#N/A		#DIV/0!		3
																						#DIV/0!	#N/A	#N/A		#DIV/0!		3
																						#DIV/0!	#N/A	#N/A		#DIV/0!		3
																						#DIV/0!	#N/A	#N/A		#DIV/0!		3
																						#DIV/0!	#N/A	#N/A		#DIV/0!		3
																						#DIV/0!	#N/A	#N/A		#DIV/0!		3
																						#DIV/0!	#N/A	#N/A		#DIV/0!		3
																						#DIV/0!	#N/A	#N/A		#DIV/0!		3
																						#DIV/0!	#N/A	#N/A		#DIV/0!		3
																						#DIV/0!	#N/A	#N/A		#DIV/0!		3
																						#DIV/0!	#N/A	#N/A		#DIV/0!		3
																						#DIV/0!	#N/A	#N/A		#DIV/0!		3
																						#DIV/0!	#N/A	#N/A		#DIV/0!		3
																						#DIV/0!	#N/A	#N/A		#DIV/0!		3
																						#DIV/0!	#N/A	#N/A		#DIV/0!		3
																						#DIV/0!	#N/A	#N/A		#DIV/0!		3
																						#DIV/0!	#N/A	#N/A		#DIV/0!		3
																						#DIV/0!	#N/A	#N/A		#DIV/0!		3
																						#DIV/0!	#N/A	#N/A		#DIV/0!		3
																						#DIV/0!	#N/A	#N/A		#DIV/0!		3
																						#DIV/0!	#N/A	#N/A		#DIV/0!		3
																						#DIV/0!	#N/A	#N/A		#DIV/0!		3
																						#DIV/0!	#N/A	#N/A		#DIV/0!		3
																						#DIV/0!	#N/A	#N/A		#DIV/0!		3
																						#DIV/0!	#N/A	#N/A		#DIV/0!		3
																						#DIV/0!	#N/A	#N/A		#DIV/0!		3
																						#DIV/0!	#N/A	#N/A		#DIV/0!		3
																						#DIV/0!	#N/A	#N/A		#DIV/0!		3
																						#DIV/0!	#N/A	#N/A		#DIV/0!		3
																						#DIV/0!	#N/A	#N/A		#DIV/0!		3
																						#DIV/0!	#N/A	#N/A		#DIV/0!		3
																						#DIV/0!	#N/A	#N/A		#DIV/0!		3
																						#DIV/0!	#N/A	#N/A		#DIV/0!		3
																						#DIV/0!	#N/A	#N/A		#DIV/0!		3
																						#DIV/0!	#N/A	#N/A		#DIV/0!		3
																						#DIV/0!	#N/A	#N/A		#DIV/0!		3
																						#DIV/0!	#N/A	#N/A		#DIV/0!		3
																						#DIV/0!	#N/A	#N/A		#DIV/0!		3
																						#DIV/0!	#N/A	#N/A		#DIV/0!		3
																						#DIV/0!	#N/A	#N/A		#DIV/0!		3
																						#DIV/0!	#N/A	#N/A		#DIV/0!		3
																						#DIV/0!	#N/A	#N/A		#DIV/0!		3
																						#DIV/0!	#N/A	#N/A		#DIV/0!		3
																						#DIV/0!	#N/A	#N/A		#DIV/0!		3
																						#DIV/0!	#N/A	#N/A		#DIV/0!		3
																						#DIV/0!	#N/A	#N/A		#DIV/0!		3
																						#DIV/0!	#N/A	#N/A		#DIV/0!		3
																						#DIV/0!	#N/A	#N/A		#DIV/0!		3
																						#DIV/0!	#N/A	#N/A		#DIV/0!		3
																						#DIV/0!	#N/A	#N/A		#DIV/0!		3
																						#DIV/0!	#N/A	#N/A		#DIV/0!		3
																						#DIV/0!	#N/A	#N/A		#DIV/0!		3
																						#DIV/0!	#N/A	#N/A		#DIV/0!		3
																						#DIV/0!	#N/A	#N/A		#DIV/0!		3
																						#DIV/0!	#N/A	#N/A		#DIV/0!		3
																						#DIV/0!	#N/A	#N/A		#DIV/0!		3
																						#DIV/0!	#N/A	#N/A		#DIV/0!		3
																						#DIV/0!	#N/A	#N/A		#DIV/0!		3
																						#DIV/0!	#N/A	#N/A		#DIV/0!		3
																						#DIV/0!	#N/A	#N/A		#DIV/0!		3
																						#DIV/0!	#N/A	#N/A		#DIV/0!		3
																						#DIV/0!	#N/A	#N/A		#DIV/0!		3
																						#DIV/0!	#N/A	#N/A		#DIV/0!		3
																						#DIV/0!	#N/A	#N/A		#DIV/0!		3
																						#DIV/0!	#N/A	#N/A		#DIV/0!		3
																						#DIV/0!	#N/A	#N/A		#DIV/0!		3
																						#DIV/0!	#N/A	#N/A		#DIV/0!		3
																						#DIV/0!	#N/A	#N/A		#DIV/0!		3
																						#DIV/0!	#N/A	#N/A		#DIV/0!		3
																						#DIV/0!	#N/A	#N/A		#DIV/0!		3
																						#DIV/0!	#N/A	#N/A		#DIV/0!		3
																						#DIV/0!	#N/A	#N/A		#DIV/0!		3
																						#DIV/0!	#N/A	#N/A		#DIV/0!		3
																						#DIV/0!	#N/A	#N/A		#DIV/0!		3
																						#DIV/0!	#N/A	#N/A		#DIV/0!		3
																						#DIV/0!	#N/A	#N/A		#DIV/0!		3
																						#DIV/0!	#N/A	#N/A		#DIV/0!		3
																						#DIV/0!	#N/A	#N/A		#DIV/0!		3
																						#DIV/0!	#N/A	#N/A		#DIV/0!		3
																						#DIV/0!	#N/A	#N/A		#DIV/0!		3
																						#DIV/0!	#N/A	#N/A		#DIV/0!		3
																						#DIV/0!	#N/A	#N/A		#DIV/0!		3
																						#DIV/0!	#N/A	#N/A		#DIV/0!		3
																						#DIV/0!	#N/A	#N/A		#DIV/0!		3
																						#DIV/0!	#N/A	#N/A		#DIV/0!		3
																						#DIV/0!	#N/A	#N/A		#DIV/0!		3
																						#DIV/0!	#N/A	#N/A		#DIV/0!		3
																						#DIV/0!	#N/A	#N/A		#DIV/0!		3
[truncated: 54 more columns]

## Sheet: partial Mixed Non-competitive
																		(V_max*((1+([I]/(K_i^' ))*(β))*([S]/K_s )))/((1+([I]/(K_i^' )))*(([S]/K_s )+((1+([I]/(K_i^' ))*((K_s^')/K_s )))/((1+([I]/(K_i^' ))) )) )					Calculated values
		No Inhibitor	[I]1	[I]2	[I]3	[I]4	[I]5	[I]6	[I]7	[I]8	[I]9	[I]10	[I]11	[I]12	[I]13	[I]14	[I]15	Ks			Ks'		No Inhibitor	[I]1	[I]2	[I]3	[I]4	[I]5	[I]6	[I]7	[I]8	[I]9	[I]10	[I]11	[I]12	[I]13	[I]14	[I]15
		0	0.05	0.1	0.15	0	0	0	0	0	0	0	0	0	0	0	0	Km	Vmax	Ki'	Km'	b	0	0.05	0.1	0.15	0	0	0	0	0	0	0	0	0	0	0	0
[S]1	1.25	0.661201	0.490798	0.426403	0.338983	0	0	0	0	0	0	0	0	0	0	0	0	0.256522	0.799944	0.251385	1.18315	0	0.663734	0.502359	0.404107	0.338001	#DIV/0!	#DIV/0!	#DIV/0!	#DIV/0!	#DIV/0!	#DIV/0!	#DIV/0!	#DIV/0!	#DIV/0!	#DIV/0!	#DIV/0!	#DIV/0!		0.663734	0.502359	0.404107	0.338001	0	0	0	0	0	0
[S]2	0.625	0.572607	0.408998	0.329696	0.198299	0	0	0	0	0	0	0	0	0	0	0	0						0.567161	0.402821	0.312323	0.255028	#DIV/0!	#DIV/0!	#DIV/0!	#DIV/0!	#DIV/0!	#DIV/0!	#DIV/0!	#DIV/0!	#DIV/0!	#DIV/0!	#DIV/0!	#DIV/0!		0.567161	0.402821	0.312323	0.255028	0	0	0	0	0	0
[S]3	0.25	0.3747	0.294898	0.1924	0.129799	0	0	0	0	0	0	0	0	0	0	0	0			Sum R2	0.00756846		0.394822	0.252644	0.185753	0.146868	#DIV/0!	#DIV/0!	#DIV/0!	#DIV/0!	#DIV/0!	#DIV/0!	#DIV/0!	#DIV/0!	#DIV/0!	#DIV/0!	#DIV/0!	#DIV/0!		0.394822	0.252644	0.185753	0.146868	0	0	0	0	0	0
[S]4	0.125	0.258498	0.1753	0.1027	0.0742997	0	0	0	0	0	0	0	0	0	0	0	0			Sum residuals %	1.53589		0.26209	0.155823	0.11087	0.0860462	#DIV/0!	#DIV/0!	#DIV/0!	#DIV/0!	#DIV/0!	#DIV/0!	#DIV/0!	#DIV/0!	#DIV/0!	#DIV/0!	#DIV/0!	#DIV/0!		0.26209	0.155823	0.11087	0.0860462	0	0	0	0	0	0
[S]5	0.0625	0.159701	0.0931003	0.0560356	0.0344828	0	0	0	0	0	0	0	0	0	0	0	0						0.156718	0.0882117	0.0613804	0.0470647	#DIV/0!	#DIV/0!	#DIV/0!	#DIV/0!	#DIV/0!	#DIV/0!	#DIV/0!	#DIV/0!	#DIV/0!	#DIV/0!	#DIV/0!	#DIV/0!		0.156718	0.0882117	0.0613804	0.0470647	0	0	0	0	0	0
[S]6	0	0	0	0	0	0	0	0	0	0	0	0	0	0	0	0	0						#DIV/0!	#DIV/0!	#DIV/0!	#DIV/0!	#DIV/0!	#DIV/0!	#DIV/0!	#DIV/0!	#DIV/0!	#DIV/0!	#DIV/0!	#DIV/0!	#DIV/0!	#DIV/0!	#DIV/0!	#DIV/0!		0	0	0	0	0	0	0	0	0	0
[S]7	0	0	0	0	0	0	0	0	0	0	0	0	0	0	0	0	0						#DIV/0!	#DIV/0!	#DIV/0!	#DIV/0!	#DIV/0!	#DIV/0!	#DIV/0!	#DIV/0!	#DIV/0!	#DIV/0!	#DIV/0!	#DIV/0!	#DIV/0!	#DIV/0!	#DIV/0!	#DIV/0!		0	0	0	0	0	0	0	0	0	0
[S]8	0	0	0	0	0	0	0	0	0	0	0	0	0	0	0	0	0						#DIV/0!	#DIV/0!	#DIV/0!	#DIV/0!	#DIV/0!	#DIV/0!	#DIV/0!	#DIV/0!	#DIV/0!	#DIV/0!	#DIV/0!	#DIV/0!	#DIV/0!	#DIV/0!	#DIV/0!	#DIV/0!		0	0	0	0	0	0	0	0	0	0
[S]9	0	0	0	0	0	0	0	0	0	0	0	0	0	0	0	0	0						#DIV/0!	#DIV/0!	#DIV/0!	#DIV/0!	#DIV/0!	#DIV/0!	#DIV/0!	#DIV/0!	#DIV/0!	#DIV/0!	#DIV/0!	#DIV/0!	#DIV/0!	#DIV/0!	#DIV/0!	#DIV/0!		0	0	0	0	0	0	0	0	0	0
[S]10	0	0	0	0	0	0	0	0	0	0	0	0	0	0	0	0	0						#DIV/0!	#DIV/0!	#DIV/0!	#DIV/0!	#DIV/0!	#DIV/0!	#DIV/0!	#DIV/0!	#DIV/0!	#DIV/0!	#DIV/0!	#DIV/0!	#DIV/0!	#DIV/0!	#DIV/0!	#DIV/0!		0	0	0	0	0	0	0	0	0	0
[S]11	0	0	0	0	0	0	0	0	0	0	0	0	0	0	0	0	0						#DIV/0!	#DIV/0!	#DIV/0!	#DIV/0!	#DIV/0!	#DIV/0!	#DIV/0!	#DIV/0!	#DIV/0!	#DIV/0!	#DIV/0!	#DIV/0!	#DIV/0!	#DIV/0!	#DIV/0!	#DIV/0!		0	0	0	0	0	0	0	0	0	0
[S]12	0	0	0	0	0	0	0	0	0	0	0	0	0	0	0	0	0						#DIV/0!	#DIV/0!	#DIV/0!	#DIV/0!	#DIV/0!	#DIV/0!	#DIV/0!	#DIV/0!	#DIV/0!	#DIV/0!	#DIV/0!	#DIV/0!	#DIV/0!	#DIV/0!	#DIV/0!	#DIV/0!		0	0	0	0	0	0	0	0	0	0
[S]13	0	0	0	0	0	0	0	0	0	0	0	0	0	0	0	0	0						#DIV/0!	#DIV/0!	#DIV/0!	#DIV/0!	#DIV/0!	#DIV/0!	#DIV/0!	#DIV/0!	#DIV/0!	#DIV/0!	#DIV/0!	#DIV/0!	#DIV/0!	#DIV/0!	#DIV/0!	#DIV/0!		0	0	0	0	0	0	0	0	0	0
[S]14	0	0	0	0	0	0	0	0	0	0	0	0	0	0	0	0	0						#DIV/0!	#DIV/0!	#DIV/0!	#DIV/0!	#DIV/0!	#DIV/0!	#DIV/0!	#DIV/0!	#DIV/0!	#DIV/0!	#DIV/0!	#DIV/0!	#DIV/0!	#DIV/0!	#DIV/0!	#DIV/0!		0	0	0	0	0	0	0	0	0	0
[S]15	0	0	0	0	0	0	0	0	0	0	0	0	0	0	0	0	0						#DIV/0!	#DIV/0!	#DIV/0!	#DIV/0!	#DIV/0!	#DIV/0!	#DIV/0!	#DIV/0!	#DIV/0!	#DIV/0!	#DIV/0!	#DIV/0!	#DIV/0!	#DIV/0!	#DIV/0!	#DIV/0!		0	0	0	0	0	0	0	0	0	0
	1	1	1	1	1	#DIV/0!	#DIV/0!	#DIV/0!	#DIV/0!	#DIV/0!	#DIV/0!	#DIV/0!	#DIV/0!	#DIV/0!	#DIV/0!	#DIV/0!	#DIV/0!																					1.25	1.25	0.663734	0.502359	0.404107	0.338001	#N/A	#N/A	#N/A	#N/A	#N/A	#N/A
	1	1	1	1	1	#DIV/0!	#DIV/0!	#DIV/0!	#DIV/0!	#DIV/0!	#DIV/0!	#DIV/0!	#DIV/0!	#DIV/0!	#DIV/0!	#DIV/0!	#DIV/0!					0.661201	0.661201	0.663734		0.00253314	0.00253314	4										0.625	0.625	0.567161	0.402821	0.312323	0.255028	#N/A	#N/A	#N/A	#N/A	#N/A	#N/A
	1	1	1	1	1	#DIV/0!	#DIV/0!	#DIV/0!	#DIV/0!	#DIV/0!	#DIV/0!	#DIV/0!	#DIV/0!	#DIV/0!	#DIV/0!	#DIV/0!	#DIV/0!					0.572607	0.572607	0.567161		-0.00544549	-0.00544549	4										0.25	0.25	0.394822	0.252644	0.185753	0.146868	#N/A	#N/A	#N/A	#N/A	#N/A	#N/A
	1	1	1	1	1	#DIV/0!	#DIV/0!	#DIV/0!	#DIV/0!	#DIV/0!	#DIV/0!	#DIV/0!	#DIV/0!	#DIV/0!	#DIV/0!	#DIV/0!	#DIV/0!					0.3747	0.3747	0.394822		0.0201217	0.0201217	4										0.125	0.125	0.26209	0.155823	0.11087	0.0860462	#N/A	#N/A	#N/A	#N/A	#N/A	#N/A
	1	1	1	1	1	#DIV/0!	#DIV/0!	#DIV/0!	#DIV/0!	#DIV/0!	#DIV/0!	#DIV/0!	#DIV/0!	#DIV/0!	#DIV/0!	#DIV/0!	#DIV/0!					0.258498	0.258498	0.26209		0.00359167	0.00359167	4										0.0625	0.0625	0.156718	0.0882117	0.0613804	0.0470647	#N/A	#N/A	#N/A	#N/A	#N/A	#N/A
	#DIV/0!	#DIV/0!	#DIV/0!	#DIV/0!	#DIV/0!	#DIV/0!	#DIV/0!	#DIV/0!	#DIV/0!	#DIV/0!	#DIV/0!	#DIV/0!	#DIV/0!	#DIV/0!	#DIV/0!	#DIV/0!	#DIV/0!					0.159701	0.159701	0.156718		-0.00298295	-0.00298295	4										#DIV/0!	#N/A	#N/A	#N/A	#N/A	#N/A	#N/A	#N/A	#N/A	#N/A	#N/A	#N/A
	#DIV/0!	#DIV/0!	#DIV/0!	#DIV/0!	#DIV/0!	#DIV/0!	#DIV/0!	#DIV/0!	#DIV/0!	#DIV/0!	#DIV/0!	#DIV/0!	#DIV/0!	#DIV/0!	#DIV/0!	#DIV/0!	#DIV/0!					#DIV/0!	#N/A	#N/A		#DIV/0!		4										#DIV/0!	#N/A	#N/A	#N/A	#N/A	#N/A	#N/A	#N/A	#N/A	#N/A	#N/A	#N/A
	#DIV/0!	#DIV/0!	#DIV/0!	#DIV/0!	#DIV/0!	#DIV/0!	#DIV/0!	#DIV/0!	#DIV/0!	#DIV/0!	#DIV/0!	#DIV/0!	#DIV/0!	#DIV/0!	#DIV/0!	#DIV/0!	#DIV/0!					#DIV/0!	#N/A	#N/A		#DIV/0!		4										#DIV/0!	#N/A	#N/A	#N/A	#N/A	#N/A	#N/A	#N/A	#N/A	#N/A	#N/A	#N/A
	#DIV/0!	#DIV/0!	#DIV/0!	#DIV/0!	#DIV/0!	#DIV/0!	#DIV/0!	#DIV/0!	#DIV/0!	#DIV/0!	#DIV/0!	#DIV/0!	#DIV/0!	#DIV/0!	#DIV/0!	#DIV/0!	#DIV/0!					#DIV/0!	#N/A	#N/A		#DIV/0!		4										#DIV/0!	#N/A	#N/A	#N/A	#N/A	#N/A	#N/A	#N/A	#N/A	#N/A	#N/A	#N/A
	#DIV/0!	#DIV/0!	#DIV/0!	#DIV/0!	#DIV/0!	#DIV/0!	#DIV/0!	#DIV/0!	#DIV/0!	#DIV/0!	#DIV/0!	#DIV/0!	#DIV/0!	#DIV/0!	#DIV/0!	#DIV/0!	#DIV/0!					#DIV/0!	#N/A	#N/A		#DIV/0!		4										#DIV/0!	#N/A	#N/A	#N/A	#N/A	#N/A	#N/A	#N/A	#N/A	#N/A	#N/A	#N/A
	#DIV/0!	#DIV/0!	#DIV/0!	#DIV/0!	#DIV/0!	#DIV/0!	#DIV/0!	#DIV/0!	#DIV/0!	#DIV/0!	#DIV/0!	#DIV/0!	#DIV/0!	#DIV/0!	#DIV/0!	#DIV/0!	#DIV/0!					#DIV/0!	#N/A	#N/A		#DIV/0!		4										#DIV/0!	#N/A	#N/A	#N/A	#N/A	#N/A	#N/A	#N/A	#N/A	#N/A	#N/A	#N/A
	#DIV/0!	#DIV/0!	#DIV/0!	#DIV/0!	#DIV/0!	#DIV/0!	#DIV/0!	#DIV/0!	#DIV/0!	#DIV/0!	#DIV/0!	#DIV/0!	#DIV/0!	#DIV/0!	#DIV/0!	#DIV/0!	#DIV/0!					#DIV/0!	#N/A	#N/A		#DIV/0!		4										#DIV/0!	#N/A	#N/A	#N/A	#N/A	#N/A	#N/A	#N/A	#N/A	#N/A	#N/A	#N/A
	#DIV/0!	#DIV/0!	#DIV/0!	#DIV/0!	#DIV/0!	#DIV/0!	#DIV/0!	#DIV/0!	#DIV/0!	#DIV/0!	#DIV/0!	#DIV/0!	#DIV/0!	#DIV/0!	#DIV/0!	#DIV/0!	#DIV/0!					#DIV/0!	#N/A	#N/A		#DIV/0!		4										#DIV/0!	#N/A	#N/A	#N/A	#N/A	#N/A	#N/A	#N/A	#N/A	#N/A	#N/A	#N/A
	#DIV/0!	#DIV/0!	#DIV/0!	#DIV/0!	#DIV/0!	#DIV/0!	#DIV/0!	#DIV/0!	#DIV/0!	#DIV/0!	#DIV/0!	#DIV/0!	#DIV/0!	#DIV/0!	#DIV/0!	#DIV/0!	#DIV/0!					#DIV/0!	#N/A	#N/A		#DIV/0!		4										#DIV/0!	#N/A	#N/A	#N/A	#N/A	#N/A	#N/A	#N/A	#N/A	#N/A	#N/A	#N/A
	#DIV/0!	#DIV/0!	#DIV/0!	#DIV/0!	#DIV/0!	#DIV/0!	#DIV/0!	#DIV/0!	#DIV/0!	#DIV/0!	#DIV/0!	#DIV/0!	#DIV/0!	#DIV/0!	#DIV/0!	#DIV/0!	#DIV/0!					#DIV/0!	#N/A	#N/A		#DIV/0!		4										#DIV/0!	#N/A	#N/A	#N/A	#N/A	#N/A	#N/A	#N/A	#N/A	#N/A	#N/A	#N/A
																						#DIV/0!	#N/A	#N/A		#DIV/0!		4
																						0.490798	0.490798	0.502359		0.011561	0.011561	4											0.8	1.50663	1.99061	2.47459	2.95857	#N/A	#N/A	#N/A	#N/A	#N/A	#N/A
																						0.408998	0.408998	0.402821		-0.00617693	-0.00617693	4											1.6	1.76317	2.48249	3.20182	3.92114	#N/A	#N/A	#N/A	#N/A	#N/A	#N/A
																						0.294898	0.294898	0.252644		-0.0422542	-0.0422542	4											4	2.53279	3.95814	5.38349	6.80884	#N/A	#N/A	#N/A	#N/A	#N/A	#N/A
																						0.1753	0.1753	0.155823		-0.0194774	-0.0194774	4											8	3.81549	6.41755	9.01961	11.6217	#N/A	#N/A	#N/A	#N/A	#N/A	#N/A
																						0.0931003	0.0931003	0.0882117		-0.00488864	-0.00488864	4											16	6.38088	11.3364	16.2918	21.2473	#N/A	#N/A	#N/A	#N/A	#N/A	#N/A
																						#DIV/0!	#N/A	#N/A		#DIV/0!		4											#N/A	#N/A	#N/A	#N/A	#N/A	#N/A	#N/A	#N/A	#N/A	#N/A	#N/A
																						#DIV/0!	#N/A	#N/A		#DIV/0!		4											#N/A	#N/A	#N/A	#N/A	#N/A	#N/A	#N/A	#N/A	#N/A	#N/A	#N/A
																						#DIV/0!	#N/A	#N/A		#DIV/0!		4											#N/A	#N/A	#N/A	#N/A	#N/A	#N/A	#N/A	#N/A	#N/A	#N/A	#N/A
																						#DIV/0!	#N/A	#N/A		#DIV/0!		4											#N/A	#N/A	#N/A	#N/A	#N/A	#N/A	#N/A	#N/A	#N/A	#N/A	#N/A
																						#DIV/0!	#N/A	#N/A		#DIV/0!		4											#N/A	#N/A	#N/A	#N/A	#N/A	#N/A	#N/A	#N/A	#N/A	#N/A	#N/A
																						#DIV/0!	#N/A	#N/A		#DIV/0!		4											#N/A	#N/A	#N/A	#N/A	#N/A	#N/A	#N/A	#N/A	#N/A	#N/A	#N/A
																						#DIV/0!	#N/A	#N/A		#DIV/0!		4											#N/A	#N/A	#N/A	#N/A	#N/A	#N/A	#N/A	#N/A	#N/A	#N/A	#N/A
																						#DIV/0!	#N/A	#N/A		#DIV/0!		4											#N/A	#N/A	#N/A	#N/A	#N/A	#N/A	#N/A	#N/A	#N/A	#N/A	#N/A
																						#DIV/0!	#N/A	#N/A		#DIV/0!		4											#N/A	#N/A	#N/A	#N/A	#N/A	#N/A	#N/A	#N/A	#N/A	#N/A	#N/A
																						#DIV/0!	#N/A	#N/A		#DIV/0!		4											#N/A	#N/A	#N/A	#N/A	#N/A	#N/A	#N/A	#N/A	#N/A	#N/A	#N/A
																						0.426403	0.426403	0.404107		-0.0222959	-0.0222959	4
																						0.329696	0.329696	0.312323		-0.017373	-0.017373	4												0.661201	0.490798	0.426403	0.338983	#DIV/0!	#DIV/0!	#DIV/0!	#DIV/0!	#DIV/0!	#DIV/0!
																						0.1924	0.1924	0.185753		-0.00664702	-0.00664702	4												0.572607	0.408998	0.329696	0.198299	#DIV/0!	#DIV/0!	#DIV/0!	#DIV/0!	#DIV/0!	#DIV/0!
																						0.1027	0.1027	0.11087		0.00816958	0.00816958	4												0.3747	0.294898	0.1924	0.129799	#DIV/0!	#DIV/0!	#DIV/0!	#DIV/0!	#DIV/0!	#DIV/0!
																						0.0560356	0.0560356	0.0613804		0.0053448	0.0053448	4												0.258498	0.1753	0.1027	0.0742997	#DIV/0!	#DIV/0!	#DIV/0!	#DIV/0!	#DIV/0!	#DIV/0!
																						#DIV/0!	#N/A	#N/A		#DIV/0!		4												0.159701	0.0931003	0.0560356	0.0344828	#DIV/0!	#DIV/0!	#DIV/0!	#DIV/0!	#DIV/0!	#DIV/0!
																						#DIV/0!	#N/A	#N/A		#DIV/0!		4												#DIV/0!	#DIV/0!	#DIV/0!	#DIV/0!	#DIV/0!	#DIV/0!	#DIV/0!	#DIV/0!	#DIV/0!	#DIV/0!
																						#DIV/0!	#N/A	#N/A		#DIV/0!		4												#DIV/0!	#DIV/0!	#DIV/0!	#DIV/0!	#DIV/0!	#DIV/0!	#DIV/0!	#DIV/0!	#DIV/0!	#DIV/0!
																						#DIV/0!	#N/A	#N/A		#DIV/0!		4												#DIV/0!	#DIV/0!	#DIV/0!	#DIV/0!	#DIV/0!	#DIV/0!	#DIV/0!	#DIV/0!	#DIV/0!	#DIV/0!
																						#DIV/0!	#N/A	#N/A		#DIV/0!		4												#DIV/0!	#DIV/0!	#DIV/0!	#DIV/0!	#DIV/0!	#DIV/0!	#DIV/0!	#DIV/0!	#DIV/0!	#DIV/0!
																						#DIV/0!	#N/A	#N/A		#DIV/0!		4												#DIV/0!	#DIV/0!	#DIV/0!	#DIV/0!	#DIV/0!	#DIV/0!	#DIV/0!	#DIV/0!	#DIV/0!	#DIV/0!
																						#DIV/0!	#N/A	#N/A		#DIV/0!		4												#DIV/0!	#DIV/0!	#DIV/0!	#DIV/0!	#DIV/0!	#DIV/0!	#DIV/0!	#DIV/0!	#DIV/0!	#DIV/0!
																						#DIV/0!	#N/A	#N/A		#DIV/0!		4												#DIV/0!	#DIV/0!	#DIV/0!	#DIV/0!	#DIV/0!	#DIV/0!	#DIV/0!	#DIV/0!	#DIV/0!	#DIV/0!
																						#DIV/0!	#N/A	#N/A		#DIV/0!		4												#DIV/0!	#DIV/0!	#DIV/0!	#DIV/0!	#DIV/0!	#DIV/0!	#DIV/0!	#DIV/0!	#DIV/0!	#DIV/0!
																						#DIV/0!	#N/A	#N/A		#DIV/0!		4												#DIV/0!	#DIV/0!	#DIV/0!	#DIV/0!	#DIV/0!	#DIV/0!	#DIV/0!	#DIV/0!	#DIV/0!	#DIV/0!
																						0.338983	0.338983	0.338001		-0.000982465	-0.000982465	4												#DIV/0!	#DIV/0!	#DIV/0!	#DIV/0!	#DIV/0!	#DIV/0!	#DIV/0!	#DIV/0!	#DIV/0!	#DIV/0!
																						0.198299	0.198299	0.255028		0.0567292	0.0567292	4
																						0.129799	0.129799	0.146868		0.0170686	0.0170686	4												1/s	0	0.05	0.1	0.15	0	0	0	0	0
																						0.0742997	0.0742997	0.0860462		0.0117464	0.0117464	4											1	0.8	1.50663	1.99061	2.47459	2.95857	#N/A	#N/A	#N/A	#N/A	#N/A
																						0.0344828	0.0344828	0.0470647		0.012582	0.012582	4											2	1.6	1.76317	2.48249	3.20182	3.92114	#N/A	#N/A	#N/A	#N/A	#N/A
																						#DIV/0!	#N/A	#N/A		#DIV/0!		4											3	4	2.53279	3.95814	5.38349	6.80884	#N/A	#N/A	#N/A	#N/A	#N/A
																						#DIV/0!	#N/A	#N/A		#DIV/0!		4											4	8	3.81549	6.41755	9.01961	11.6217	#N/A	#N/A	#N/A	#N/A	#N/A
																						#DIV/0!	#N/A	#N/A		#DIV/0!		4											5	16	6.38088	11.3364	16.2918	21.2473	#N/A	#N/A	#N/A	#N/A	#N/A
																						#DIV/0!	#N/A	#N/A		#DIV/0!		4											6	#N/A	#N/A	#N/A	#N/A	#N/A	#N/A	#N/A	#N/A	#N/A	#N/A
																						#DIV/0!	#N/A	#N/A		#DIV/0!		4											7	#N/A	#N/A	#N/A	#N/A	#N/A	#N/A	#N/A	#N/A	#N/A	#N/A
																						#DIV/0!	#N/A	#N/A		#DIV/0!		4											8	#N/A	#N/A	#N/A	#N/A	#N/A	#N/A	#N/A	#N/A	#N/A	#N/A
																						#DIV/0!	#N/A	#N/A		#DIV/0!		4											9	#N/A	#N/A	#N/A	#N/A	#N/A	#N/A	#N/A	#N/A	#N/A	#N/A
																						#DIV/0!	#N/A	#N/A		#DIV/0!		4											10	#N/A	#N/A	#N/A	#N/A	#N/A	#N/A	#N/A	#N/A	#N/A	#N/A
																						#DIV/0!	#N/A	#N/A		#DIV/0!		4											11	#N/A	#N/A	#N/A	#N/A	#N/A	#N/A	#N/A	#N/A	#N/A	#N/A
																						#DIV/0!	#N/A	#N/A		#DIV/0!		4											12	#N/A	#N/A	#N/A	#N/A	#N/A	#N/A	#N/A	#N/A	#N/A	#N/A
																						#DIV/0!	#N/A	#N/A		#DIV/0!		4											13	#N/A	#N/A	#N/A	#N/A	#N/A	#N/A	#N/A	#N/A	#N/A	#N/A
																						#DIV/0!	#N/A	#N/A		#DIV/0!		4											14	#N/A	#N/A	#N/A	#N/A	#N/A	#N/A	#N/A	#N/A	#N/A	#N/A
																						#DIV/0!	#N/A	#N/A		#DIV/0!		4											15	#N/A	#N/A	#N/A	#N/A	#N/A	#N/A	#N/A	#N/A	#N/A	#N/A
																						#DIV/0!	#N/A	#N/A		#DIV/0!		4
																						#DIV/0!	#N/A	#N/A		#DIV/0!		4
																						#DIV/0!	#N/A	#N/A		#DIV/0!		4
																						#DIV/0!	#N/A	#N/A		#DIV/0!		4
																						#DIV/0!	#N/A	#N/A		#DIV/0!		4
																						#DIV/0!	#N/A	#N/A		#DIV/0!		4
																						#DIV/0!	#N/A	#N/A		#DIV/0!		4
																						#DIV/0!	#N/A	#N/A		#DIV/0!		4
																						#DIV/0!	#N/A	#N/A		#DIV/0!		4
																						#DIV/0!	#N/A	#N/A		#DIV/0!		4
																						#DIV/0!	#N/A	#N/A		#DIV/0!		4
																						#DIV/0!	#N/A	#N/A		#DIV/0!		4
																						#DIV/0!	#N/A	#N/A		#DIV/0!		4
																						#DIV/0!	#N/A	#N/A		#DIV/0!		4
																						#DIV/0!	#N/A	#N/A		#DIV/0!		4
																						#DIV/0!	#N/A	#N/A		#DIV/0!		4
																						#DIV/0!	#N/A	#N/A		#DIV/0!		4
																						#DIV/0!	#N/A	#N/A		#DIV/0!		4
																						#DIV/0!	#N/A	#N/A		#DIV/0!		4
																						#DIV/0!	#N/A	#N/A		#DIV/0!		4
																						#DIV/0!	#N/A	#N/A		#DIV/0!		4
																						#DIV/0!	#N/A	#N/A		#DIV/0!		4
																						#DIV/0!	#N/A	#N/A		#DIV/0!		4
																						#DIV/0!	#N/A	#N/A		#DIV/0!		4
																						#DIV/0!	#N/A	#N/A		#DIV/0!		4
																						#DIV/0!	#N/A	#N/A		#DIV/0!		4
																						#DIV/0!	#N/A	#N/A		#DIV/0!		4
																						#DIV/0!	#N/A	#N/A		#DIV/0!		4
																						#DIV/0!	#N/A	#N/A		#DIV/0!		4
																						#DIV/0!	#N/A	#N/A		#DIV/0!		4
																						#DIV/0!	#N/A	#N/A		#DIV/0!		4
																						#DIV/0!	#N/A	#N/A		#DIV/0!		4
																						#DIV/0!	#N/A	#N/A		#DIV/0!		4
																						#DIV/0!	#N/A	#N/A		#DIV/0!		4
																						#DIV/0!	#N/A	#N/A		#DIV/0!		4
																						#DIV/0!	#N/A	#N/A		#DIV/0!		4
																						#DIV/0!	#N/A	#N/A		#DIV/0!		4
																						#DIV/0!	#N/A	#N/A		#DIV/0!		4
																						#DIV/0!	#N/A	#N/A		#DIV/0!		4
																						#DIV/0!	#N/A	#N/A		#DIV/0!		4
																						#DIV/0!	#N/A	#N/A		#DIV/0!		4
																						#DIV/0!	#N/A	#N/A		#DIV/0!		4
																						#DIV/0!	#N/A	#N/A		#DIV/0!		4
																						#DIV/0!	#N/A	#N/A		#DIV/0!		4
																						#DIV/0!	#N/A	#N/A		#DIV/0!		4
																						#DIV/0!	#N/A	#N/A		#DIV/0!		4
																						#DIV/0!	#N/A	#N/A		#DIV/0!		4
																						#DIV/0!	#N/A	#N/A		#DIV/0!		4
																						#DIV/0!	#N/A	#N/A		#DIV/0!		4
																						#DIV/0!	#N/A	#N/A		#DIV/0!		4
																						#DIV/0!	#N/A	#N/A		#DIV/0!		4
																						#DIV/0!	#N/A	#N/A		#DIV/0!		4
																						#DIV/0!	#N/A	#N/A		#DIV/0!		4
																						#DIV/0!	#N/A	#N/A		#DIV/0!		4
																						#DIV/0!	#N/A	#N/A		#DIV/0!		4
																						#DIV/0!	#N/A	#N/A		#DIV/0!		4
																						#DIV/0!	#N/A	#N/A		#DIV/0!		4
																						#DIV/0!	#N/A	#N/A		#DIV/0!		4
																						#DIV/0!	#N/A	#N/A		#DIV/0!		4
																						#DIV/0!	#N/A	#N/A		#DIV/0!		4
																						#DIV/0!	#N/A	#N/A		#DIV/0!		4
																						#DIV/0!	#N/A	#N/A		#DIV/0!		4
																						#DIV/0!	#N/A	#N/A		#DIV/0!		4
																						#DIV/0!	#N/A	#N/A		#DIV/0!		4
																						#DIV/0!	#N/A	#N/A		#DIV/0!		4
																						#DIV/0!	#N/A	#N/A		#DIV/0!		4
																						#DIV/0!	#N/A	#N/A		#DIV/0!		4
																						#DIV/0!	#N/A	#N/A		#DIV/0!		4
																						#DIV/0!	#N/A	#N/A		#DIV/0!		4
																						#DIV/0!	#N/A	#N/A		#DIV/0!		4
																						#DIV/0!	#N/A	#N/A		#DIV/0!		4
																						#DIV/0!	#N/A	#N/A		#DIV/0!		4
																						#DIV/0!	#N/A	#N/A		#DIV/0!		4
																						#DIV/0!	#N/A	#N/A		#DIV/0!		4
																						#DIV/0!	#N/A	#N/A		#DIV/0!		4
																						#DIV/0!	#N/A	#N/A		#DIV/0!		4
																						#DIV/0!	#N/A	#N/A		#DIV/0!		4
																						#DIV/0!	#N/A	#N/A		#DIV/0!		4
																						#DIV/0!	#N/A	#N/A		#DIV/0!		4
																						#DIV/0!	#N/A	#N/A		#DIV/0!		4
																						#DIV/0!	#N/A	#N/A		#DIV/0!		4
																						#DIV/0!	#N/A	#N/A		#DIV/0!		4
																						#DIV/0!	#N/A	#N/A		#DIV/0!		4
																						#DIV/0!	#N/A	#N/A		#DIV/0!		4
																						#DIV/0!	#N/A	#N/A		#DIV/0!		4
																						#DIV/0!	#N/A	#N/A		#DIV/0!		4
																						#DIV/0!	#N/A	#N/A		#DIV/0!		4
																						#DIV/0!	#N/A	#N/A		#DIV/0!		4
																						#DIV/0!	#N/A	#N/A		#DIV/0!		4
																						#DIV/0!	#N/A	#N/A		#DIV/0!		4
																						#DIV/0!	#N/A	#N/A		#DIV/0!		4
																						#DIV/0!	#N/A	#N/A		#DIV/0!		4
																						#DIV/0!	#N/A	#N/A		#DIV/0!		4
																						#DIV/0!	#N/A	#N/A		#DIV/0!		4
																						#DIV/0!	#N/A	#N/A		#DIV/0!		4
																						#DIV/0!	#N/A	#N/A		#DIV/0!		4
																						#DIV/0!	#N/A	#N/A		#DIV/0!		4
																						#DIV/0!	#N/A	#N/A		#DIV/0!		4
																						#DIV/0!	#N/A	#N/A		#DIV/0!		4
																						#DIV/0!	#N/A	#N/A		#DIV/0!		4
																						#DIV/0!	#N/A	#N/A		#DIV/0!		4
																						#DIV/0!	#N/A	#N/A		#DIV/0!		4
																						#DIV/0!	#N/A	#N/A		#DIV/0!		4
																						#DIV/0!	#N/A	#N/A		#DIV/0!		4
																						#DIV/0!	#N/A	#N/A		#DIV/0!		4
																						#DIV/0!	#N/A	#N/A		#DIV/0!		4
																						#DIV/0!	#N/A	#N/A		#DIV/0!		4
																						#DIV/0!	#N/A	#N/A		#DIV/0!		4
																						#DIV/0!	#N/A	#N/A		#DIV/0!		4
																						#DIV/0!	#N/A	#N/A		#DIV/0!		4
																						#DIV/0!	#N/A	#N/A		#DIV/0!		4
																						#DIV/0!	#N/A	#N/A		#DIV/0!		4
																						#DIV/0!	#N/A	#N/A		#DIV/0!		4
																						#DIV/0!	#N/A	#N/A		#DIV/0!		4
																						#DIV/0!	#N/A	#N/A		#DIV/0!		4
																						#DIV/0!	#N/A	#N/A		#DIV/0!		4
																						#DIV/0!	#N/A	#N/A		#DIV/0!		4
																						#DIV/0!	#N/A	#N/A		#DIV/0!		4
																						#DIV/0!	#N/A	#N/A		#DIV/0!		4
																						#DIV/0!	#N/A	#N/A		#DIV/0!		4
																						#DIV/0!	#N/A	#N/A		#DIV/0!		4
																						#DIV/0!	#N/A	#N/A		#DIV/0!		4
																						#DIV/0!	#N/A	#N/A		#DIV/0!		4
																						#DIV/0!	#N/A	#N/A		#DIV/0!		4
																						#DIV/0!	#N/A	#N/A		#DIV/0!		4
																						#DIV/0!	#N/A	#N/A		#DIV/0!		4
																						#DIV/0!	#N/A	#N/A		#DIV/0!		4
																						#DIV/0!	#N/A	#N/A		#DIV/0!		4
																						#DIV/0!	#N/A	#N/A		#DIV/0!		4
																						#DIV/0!	#N/A	#N/A		#DIV/0!		4
																						#DIV/0!	#N/A	#N/A		#DIV/0!		4
																						#DIV/0!	#N/A	#N/A		#DIV/0!		4
																						#DIV/0!	#N/A	#N/A		#DIV/0!		4
																						#DIV/0!	#N/A	#N/A		#DIV/0!		4
																						#DIV/0!	#N/A	#N/A		#DIV/0!		4
																						#DIV/0!	#N/A	#N/A		#DIV/0!		4
																						#DIV/0!	#N/A	#N/A		#DIV/0!		4
																						#DIV/0!	#N/A	#N/A		#DIV/0!		4
																						#DIV/0!	#N/A	#N/A		#DIV/0!		4
																						#DIV/0!	#N/A	#N/A		#DIV/0!		4
																						#DIV/0!	#N/A	#N/A		#DIV/0!		4
																						#DIV/0!	#N/A	#N/A		#DIV/0!		4
																						#DIV/0!	#N/A	#N/A		#DIV/0!		4
																						#DIV/0!	#N/A	#N/A		#DIV/0!		4
																						#DIV/0!	#N/A	#N/A		#DIV/0!		4
																						#DIV/0!	#N/A	#N/A		#DIV/0!		4
																						#DIV/0!	#N/A	#N/A		#DIV/0!		4
																						#DIV/0!	#N/A	#N/A		#DIV/0!		4
																						#DIV/0!	#N/A	#N/A		#DIV/0!		4
																						#DIV/0!	#N/A	#N/A		#DIV/0!		4
																						#DIV/0!	#N/A	#N/A		#DIV/0!		4
																						#DIV/0!	#N/A	#N/A		#DIV/0!		4
																						#DIV/0!	#N/A	#N/A		#DIV/0!		4
																						#DIV/0!	#N/A	#N/A		#DIV/0!		4
																						#DIV/0!	#N/A	#N/A		#DIV/0!		4
																						#DIV/0!	#N/A	#N/A		#DIV/0!		4
																						#DIV/0!	#N/A	#N/A		#DIV/0!		4
																						#DIV/0!	#N/A	#N/A		#DIV/0!		4
																						#DIV/0!	#N/A	#N/A		#DIV/0!		4
																						#DIV/0!	#N/A	#N/A		#DIV/0!		4
																						#DIV/0!	#N/A	#N/A		#DIV/0!		4
																						#DIV/0!	#N/A	#N/A		#DIV/0!		4
																						#DIV/0!	#N/A	#N/A		#DIV/0!		4
																						#DIV/0!	#N/A	#N/A		#DIV/0!		4
																						#DIV/0!	#N/A	#N/A		#DIV/0!		4
																						#DIV/0!	#N/A	#N/A		#DIV/0!		4
																						#DIV/0!	#N/A	#N/A		#DIV/0!		4
																						#DIV/0!	#N/A	#N/A		#DIV/0!		4
																						#DIV/0!	#N/A	#N/A		#DIV/0!		4
																						#DIV/0!	#N/A	#N/A		#DIV/0!		4
																						#DIV/0!	#N/A	#N/A		#DIV/0!		4
																						#DIV/0!	#N/A	#N/A		#DIV/0!		4
																						#DIV/0!	#N/A	#N/A		#DIV/0!		4
																						#DIV/0!	#N/A	#N/A		#DIV/0!		4
																						#DIV/0!	#N/A	#N/A		#DIV/0!		4
																						#DIV/0!	#N/A	#N/A		#DIV/0!		4
																						#DIV/0!	#N/A	#N/A		#DIV/0!		4
[truncated: 54 more columns]

## Sheet: Modifier equation
																							Calculated values
		No Inhibitor	[I]1	[I]2	[I]3	[I]4	[I]5	[I]6	[I]7	[I]8	[I]9	[I]10	[I]11	[I]12	[I]13	[I]14	[I]15					Ki	No Inhibitor	[I]1	[I]2	[I]3	[I]4	[I]5	[I]6	[I]7	[I]8	[I]9	[I]10	[I]11	[I]12	[I]13	[I]14	[I]15
		0	0.05	0.1	0.15	0	0	0	0	0	0	0	0	0	0	0	0	K1	0.256522	V1	0.799944	0.251385	0	0.05	0.1	0.15	0	0	0	0	0	0	0	0	0	0	0	0
[S]1	1.25	0.661201	0.490798	0.426403	0.338983	0	0	0	0	0	0	0	0	0	0	0	0	K2	1.18315	V2	0		0.663734	0.502359	0.404107	0.338001	#DIV/0!	#DIV/0!	#DIV/0!	#DIV/0!	#DIV/0!	#DIV/0!	#DIV/0!	#DIV/0!	#DIV/0!	#DIV/0!	#DIV/0!	#DIV/0!		0.663734	0.502359	0.404107	0.338001	0	0	0	0	0	0
[S]2	0.625	0.572607	0.408998	0.329696	0.198299	0	0	0	0	0	0	0	0	0	0	0	0						0.567161	0.402821	0.312323	0.255028	#DIV/0!	#DIV/0!	#DIV/0!	#DIV/0!	#DIV/0!	#DIV/0!	#DIV/0!	#DIV/0!	#DIV/0!	#DIV/0!	#DIV/0!	#DIV/0!		0.567161	0.402821	0.312323	0.255028	0	0	0	0	0	0
[S]3	0.25	0.3747	0.294898	0.1924	0.129799	0	0	0	0	0	0	0	0	0	0	0	0						0.394822	0.252644	0.185753	0.146868	#DIV/0!	#DIV/0!	#DIV/0!	#DIV/0!	#DIV/0!	#DIV/0!	#DIV/0!	#DIV/0!	#DIV/0!	#DIV/0!	#DIV/0!	#DIV/0!		0.394822	0.252644	0.185753	0.146868	0	0	0	0	0	0
[S]4	0.125	0.258498	0.1753	0.1027	0.0742997	0	0	0	0	0	0	0	0	0	0	0	0						0.26209	0.155823	0.11087	0.0860462	#DIV/0!	#DIV/0!	#DIV/0!	#DIV/0!	#DIV/0!	#DIV/0!	#DIV/0!	#DIV/0!	#DIV/0!	#DIV/0!	#DIV/0!	#DIV/0!		0.26209	0.155823	0.11087	0.0860462	0	0	0	0	0	0
[S]5	0.0625	0.159701	0.0931003	0.0560356	0.0344828	0	0	0	0	0	0	0	0	0	0	0	0						0.156718	0.0882117	0.0613804	0.0470647	#DIV/0!	#DIV/0!	#DIV/0!	#DIV/0!	#DIV/0!	#DIV/0!	#DIV/0!	#DIV/0!	#DIV/0!	#DIV/0!	#DIV/0!	#DIV/0!		0.156718	0.0882117	0.0613804	0.0470647	0	0	0	0	0	0
[S]6	0	0	0	0	0	0	0	0	0	0	0	0	0	0	0	0	0			Sum R2	0.00756846		#DIV/0!	#DIV/0!	#DIV/0!	#DIV/0!	#DIV/0!	#DIV/0!	#DIV/0!	#DIV/0!	#DIV/0!	#DIV/0!	#DIV/0!	#DIV/0!	#DIV/0!	#DIV/0!	#DIV/0!	#DIV/0!		0	0	0	0	0	0	0	0	0	0
[S]7	0	0	0	0	0	0	0	0	0	0	0	0	0	0	0	0	0			Sum residuals %	1.53589		#DIV/0!	#DIV/0!	#DIV/0!	#DIV/0!	#DIV/0!	#DIV/0!	#DIV/0!	#DIV/0!	#DIV/0!	#DIV/0!	#DIV/0!	#DIV/0!	#DIV/0!	#DIV/0!	#DIV/0!	#DIV/0!		0	0	0	0	0	0	0	0	0	0
[S]8	0	0	0	0	0	0	0	0	0	0	0	0	0	0	0	0	0						#DIV/0!	#DIV/0!	#DIV/0!	#DIV/0!	#DIV/0!	#DIV/0!	#DIV/0!	#DIV/0!	#DIV/0!	#DIV/0!	#DIV/0!	#DIV/0!	#DIV/0!	#DIV/0!	#DIV/0!	#DIV/0!		0	0	0	0	0	0	0	0	0	0
[S]9	0	0	0	0	0	0	0	0	0	0	0	0	0	0	0	0	0						#DIV/0!	#DIV/0!	#DIV/0!	#DIV/0!	#DIV/0!	#DIV/0!	#DIV/0!	#DIV/0!	#DIV/0!	#DIV/0!	#DIV/0!	#DIV/0!	#DIV/0!	#DIV/0!	#DIV/0!	#DIV/0!		0	0	0	0	0	0	0	0	0	0
[S]10	0	0	0	0	0	0	0	0	0	0	0	0	0	0	0	0	0						#DIV/0!	#DIV/0!	#DIV/0!	#DIV/0!	#DIV/0!	#DIV/0!	#DIV/0!	#DIV/0!	#DIV/0!	#DIV/0!	#DIV/0!	#DIV/0!	#DIV/0!	#DIV/0!	#DIV/0!	#DIV/0!		0	0	0	0	0	0	0	0	0	0
[S]11	0	0	0	0	0	0	0	0	0	0	0	0	0	0	0	0	0						#DIV/0!	#DIV/0!	#DIV/0!	#DIV/0!	#DIV/0!	#DIV/0!	#DIV/0!	#DIV/0!	#DIV/0!	#DIV/0!	#DIV/0!	#DIV/0!	#DIV/0!	#DIV/0!	#DIV/0!	#DIV/0!		0	0	0	0	0	0	0	0	0	0
[S]12	0	0	0	0	0	0	0	0	0	0	0	0	0	0	0	0	0						#DIV/0!	#DIV/0!	#DIV/0!	#DIV/0!	#DIV/0!	#DIV/0!	#DIV/0!	#DIV/0!	#DIV/0!	#DIV/0!	#DIV/0!	#DIV/0!	#DIV/0!	#DIV/0!	#DIV/0!	#DIV/0!		0	0	0	0	0	0	0	0	0	0
[S]13	0	0	0	0	0	0	0	0	0	0	0	0	0	0	0	0	0						#DIV/0!	#DIV/0!	#DIV/0!	#DIV/0!	#DIV/0!	#DIV/0!	#DIV/0!	#DIV/0!	#DIV/0!	#DIV/0!	#DIV/0!	#DIV/0!	#DIV/0!	#DIV/0!	#DIV/0!	#DIV/0!		0	0	0	0	0	0	0	0	0	0
[S]14	0	0	0	0	0	0	0	0	0	0	0	0	0	0	0	0	0						#DIV/0!	#DIV/0!	#DIV/0!	#DIV/0!	#DIV/0!	#DIV/0!	#DIV/0!	#DIV/0!	#DIV/0!	#DIV/0!	#DIV/0!	#DIV/0!	#DIV/0!	#DIV/0!	#DIV/0!	#DIV/0!		0	0	0	0	0	0	0	0	0	0
[S]15	0	0	0	0	0	0	0	0	0	0	0	0	0	0	0	0	0						#DIV/0!	#DIV/0!	#DIV/0!	#DIV/0!	#DIV/0!	#DIV/0!	#DIV/0!	#DIV/0!	#DIV/0!	#DIV/0!	#DIV/0!	#DIV/0!	#DIV/0!	#DIV/0!	#DIV/0!	#DIV/0!		0	0	0	0	0	0	0	0	0	0
	1	1	1	1	1	#DIV/0!	#DIV/0!	#DIV/0!	#DIV/0!	#DIV/0!	#DIV/0!	#DIV/0!	#DIV/0!	#DIV/0!	#DIV/0!	#DIV/0!	#DIV/0!																					1.25	1.25	0.663734	0.502359	0.404107	0.338001	#N/A	#N/A	#N/A	#N/A	#N/A	#N/A
	1	1	1	1	1	#DIV/0!	#DIV/0!	#DIV/0!	#DIV/0!	#DIV/0!	#DIV/0!	#DIV/0!	#DIV/0!	#DIV/0!	#DIV/0!	#DIV/0!	#DIV/0!					0.661201	0.661201	0.663734		0.00253314	0.00253314	5										0.625	0.625	0.567161	0.402821	0.312323	0.255028	#N/A	#N/A	#N/A	#N/A	#N/A	#N/A
	1	1	1	1	1	#DIV/0!	#DIV/0!	#DIV/0!	#DIV/0!	#DIV/0!	#DIV/0!	#DIV/0!	#DIV/0!	#DIV/0!	#DIV/0!	#DIV/0!	#DIV/0!					0.572607	0.572607	0.567161		-0.00544549	-0.00544549	5										0.25	0.25	0.394822	0.252644	0.185753	0.146868	#N/A	#N/A	#N/A	#N/A	#N/A	#N/A
	1	1	1	1	1	#DIV/0!	#DIV/0!	#DIV/0!	#DIV/0!	#DIV/0!	#DIV/0!	#DIV/0!	#DIV/0!	#DIV/0!	#DIV/0!	#DIV/0!	#DIV/0!					0.3747	0.3747	0.394822		0.0201217	0.0201217	5										0.125	0.125	0.26209	0.155823	0.11087	0.0860462	#N/A	#N/A	#N/A	#N/A	#N/A	#N/A
	1	1	1	1	1	#DIV/0!	#DIV/0!	#DIV/0!	#DIV/0!	#DIV/0!	#DIV/0!	#DIV/0!	#DIV/0!	#DIV/0!	#DIV/0!	#DIV/0!	#DIV/0!					0.258498	0.258498	0.26209		0.00359167	0.00359167	5										0.0625	0.0625	0.156718	0.0882117	0.0613804	0.0470647	#N/A	#N/A	#N/A	#N/A	#N/A	#N/A
	#DIV/0!	#DIV/0!	#DIV/0!	#DIV/0!	#DIV/0!	#DIV/0!	#DIV/0!	#DIV/0!	#DIV/0!	#DIV/0!	#DIV/0!	#DIV/0!	#DIV/0!	#DIV/0!	#DIV/0!	#DIV/0!	#DIV/0!					0.159701	0.159701	0.156718		-0.00298295	-0.00298295	5										#DIV/0!	#N/A	#N/A	#N/A	#N/A	#N/A	#N/A	#N/A	#N/A	#N/A	#N/A	#N/A
	#DIV/0!	#DIV/0!	#DIV/0!	#DIV/0!	#DIV/0!	#DIV/0!	#DIV/0!	#DIV/0!	#DIV/0!	#DIV/0!	#DIV/0!	#DIV/0!	#DIV/0!	#DIV/0!	#DIV/0!	#DIV/0!	#DIV/0!					#DIV/0!	#N/A	#N/A		#DIV/0!		5										#DIV/0!	#N/A	#N/A	#N/A	#N/A	#N/A	#N/A	#N/A	#N/A	#N/A	#N/A	#N/A
	#DIV/0!	#DIV/0!	#DIV/0!	#DIV/0!	#DIV/0!	#DIV/0!	#DIV/0!	#DIV/0!	#DIV/0!	#DIV/0!	#DIV/0!	#DIV/0!	#DIV/0!	#DIV/0!	#DIV/0!	#DIV/0!	#DIV/0!					#DIV/0!	#N/A	#N/A		#DIV/0!		5										#DIV/0!	#N/A	#N/A	#N/A	#N/A	#N/A	#N/A	#N/A	#N/A	#N/A	#N/A	#N/A
	#DIV/0!	#DIV/0!	#DIV/0!	#DIV/0!	#DIV/0!	#DIV/0!	#DIV/0!	#DIV/0!	#DIV/0!	#DIV/0!	#DIV/0!	#DIV/0!	#DIV/0!	#DIV/0!	#DIV/0!	#DIV/0!	#DIV/0!					#DIV/0!	#N/A	#N/A		#DIV/0!		5										#DIV/0!	#N/A	#N/A	#N/A	#N/A	#N/A	#N/A	#N/A	#N/A	#N/A	#N/A	#N/A
	#DIV/0!	#DIV/0!	#DIV/0!	#DIV/0!	#DIV/0!	#DIV/0!	#DIV/0!	#DIV/0!	#DIV/0!	#DIV/0!	#DIV/0!	#DIV/0!	#DIV/0!	#DIV/0!	#DIV/0!	#DIV/0!	#DIV/0!					#DIV/0!	#N/A	#N/A		#DIV/0!		5										#DIV/0!	#N/A	#N/A	#N/A	#N/A	#N/A	#N/A	#N/A	#N/A	#N/A	#N/A	#N/A
	#DIV/0!	#DIV/0!	#DIV/0!	#DIV/0!	#DIV/0!	#DIV/0!	#DIV/0!	#DIV/0!	#DIV/0!	#DIV/0!	#DIV/0!	#DIV/0!	#DIV/0!	#DIV/0!	#DIV/0!	#DIV/0!	#DIV/0!					#DIV/0!	#N/A	#N/A		#DIV/0!		5										#DIV/0!	#N/A	#N/A	#N/A	#N/A	#N/A	#N/A	#N/A	#N/A	#N/A	#N/A	#N/A
	#DIV/0!	#DIV/0!	#DIV/0!	#DIV/0!	#DIV/0!	#DIV/0!	#DIV/0!	#DIV/0!	#DIV/0!	#DIV/0!	#DIV/0!	#DIV/0!	#DIV/0!	#DIV/0!	#DIV/0!	#DIV/0!	#DIV/0!					#DIV/0!	#N/A	#N/A		#DIV/0!		5										#DIV/0!	#N/A	#N/A	#N/A	#N/A	#N/A	#N/A	#N/A	#N/A	#N/A	#N/A	#N/A
	#DIV/0!	#DIV/0!	#DIV/0!	#DIV/0!	#DIV/0!	#DIV/0!	#DIV/0!	#DIV/0!	#DIV/0!	#DIV/0!	#DIV/0!	#DIV/0!	#DIV/0!	#DIV/0!	#DIV/0!	#DIV/0!	#DIV/0!					#DIV/0!	#N/A	#N/A		#DIV/0!		5										#DIV/0!	#N/A	#N/A	#N/A	#N/A	#N/A	#N/A	#N/A	#N/A	#N/A	#N/A	#N/A
	#DIV/0!	#DIV/0!	#DIV/0!	#DIV/0!	#DIV/0!	#DIV/0!	#DIV/0!	#DIV/0!	#DIV/0!	#DIV/0!	#DIV/0!	#DIV/0!	#DIV/0!	#DIV/0!	#DIV/0!	#DIV/0!	#DIV/0!					#DIV/0!	#N/A	#N/A		#DIV/0!		5										#DIV/0!	#N/A	#N/A	#N/A	#N/A	#N/A	#N/A	#N/A	#N/A	#N/A	#N/A	#N/A
	#DIV/0!	#DIV/0!	#DIV/0!	#DIV/0!	#DIV/0!	#DIV/0!	#DIV/0!	#DIV/0!	#DIV/0!	#DIV/0!	#DIV/0!	#DIV/0!	#DIV/0!	#DIV/0!	#DIV/0!	#DIV/0!	#DIV/0!					#DIV/0!	#N/A	#N/A		#DIV/0!		5										#DIV/0!	#N/A	#N/A	#N/A	#N/A	#N/A	#N/A	#N/A	#N/A	#N/A	#N/A	#N/A
																						#DIV/0!	#N/A	#N/A		#DIV/0!		5
																						0.490798	0.490798	0.502359		0.011561	0.011561	5											0.8	1.50663	1.99061	2.47459	2.95857	#N/A	#N/A	#N/A	#N/A	#N/A	#N/A
																						0.408998	0.408998	0.402821		-0.00617693	-0.00617693	5											1.6	1.76317	2.48249	3.20182	3.92114	#N/A	#N/A	#N/A	#N/A	#N/A	#N/A
																						0.294898	0.294898	0.252644		-0.0422542	-0.0422542	5											4	2.53279	3.95814	5.38349	6.80884	#N/A	#N/A	#N/A	#N/A	#N/A	#N/A
																						0.1753	0.1753	0.155823		-0.0194774	-0.0194774	5											8	3.81549	6.41755	9.01961	11.6217	#N/A	#N/A	#N/A	#N/A	#N/A	#N/A
																						0.0931003	0.0931003	0.0882117		-0.00488864	-0.00488864	5											16	6.38088	11.3364	16.2918	21.2473	#N/A	#N/A	#N/A	#N/A	#N/A	#N/A
																						#DIV/0!	#N/A	#N/A		#DIV/0!		5											#N/A	#N/A	#N/A	#N/A	#N/A	#N/A	#N/A	#N/A	#N/A	#N/A	#N/A
																						#DIV/0!	#N/A	#N/A		#DIV/0!		5											#N/A	#N/A	#N/A	#N/A	#N/A	#N/A	#N/A	#N/A	#N/A	#N/A	#N/A
																						#DIV/0!	#N/A	#N/A		#DIV/0!		5											#N/A	#N/A	#N/A	#N/A	#N/A	#N/A	#N/A	#N/A	#N/A	#N/A	#N/A
																						#DIV/0!	#N/A	#N/A		#DIV/0!		5											#N/A	#N/A	#N/A	#N/A	#N/A	#N/A	#N/A	#N/A	#N/A	#N/A	#N/A
																						#DIV/0!	#N/A	#N/A		#DIV/0!		5											#N/A	#N/A	#N/A	#N/A	#N/A	#N/A	#N/A	#N/A	#N/A	#N/A	#N/A
																						#DIV/0!	#N/A	#N/A		#DIV/0!		5											#N/A	#N/A	#N/A	#N/A	#N/A	#N/A	#N/A	#N/A	#N/A	#N/A	#N/A
																						#DIV/0!	#N/A	#N/A		#DIV/0!		5											#N/A	#N/A	#N/A	#N/A	#N/A	#N/A	#N/A	#N/A	#N/A	#N/A	#N/A
																						#DIV/0!	#N/A	#N/A		#DIV/0!		5											#N/A	#N/A	#N/A	#N/A	#N/A	#N/A	#N/A	#N/A	#N/A	#N/A	#N/A
																						#DIV/0!	#N/A	#N/A		#DIV/0!		5											#N/A	#N/A	#N/A	#N/A	#N/A	#N/A	#N/A	#N/A	#N/A	#N/A	#N/A
																						#DIV/0!	#N/A	#N/A		#DIV/0!		5											#N/A	#N/A	#N/A	#N/A	#N/A	#N/A	#N/A	#N/A	#N/A	#N/A	#N/A
																						0.426403	0.426403	0.404107		-0.0222959	-0.0222959	5
																						0.329696	0.329696	0.312323		-0.017373	-0.017373	5												0.661201	0.490798	0.426403	0.338983	#DIV/0!	#DIV/0!	#DIV/0!	#DIV/0!	#DIV/0!	#DIV/0!
																						0.1924	0.1924	0.185753		-0.00664702	-0.00664702	5												0.572607	0.408998	0.329696	0.198299	#DIV/0!	#DIV/0!	#DIV/0!	#DIV/0!	#DIV/0!	#DIV/0!
																						0.1027	0.1027	0.11087		0.00816958	0.00816958	5												0.3747	0.294898	0.1924	0.129799	#DIV/0!	#DIV/0!	#DIV/0!	#DIV/0!	#DIV/0!	#DIV/0!
																						0.0560356	0.0560356	0.0613804		0.0053448	0.0053448	5												0.258498	0.1753	0.1027	0.0742997	#DIV/0!	#DIV/0!	#DIV/0!	#DIV/0!	#DIV/0!	#DIV/0!
																						#DIV/0!	#N/A	#N/A		#DIV/0!		5												0.159701	0.0931003	0.0560356	0.0344828	#DIV/0!	#DIV/0!	#DIV/0!	#DIV/0!	#DIV/0!	#DIV/0!
																						#DIV/0!	#N/A	#N/A		#DIV/0!		5												#DIV/0!	#DIV/0!	#DIV/0!	#DIV/0!	#DIV/0!	#DIV/0!	#DIV/0!	#DIV/0!	#DIV/0!	#DIV/0!
																						#DIV/0!	#N/A	#N/A		#DIV/0!		5												#DIV/0!	#DIV/0!	#DIV/0!	#DIV/0!	#DIV/0!	#DIV/0!	#DIV/0!	#DIV/0!	#DIV/0!	#DIV/0!
																						#DIV/0!	#N/A	#N/A		#DIV/0!		5												#DIV/0!	#DIV/0!	#DIV/0!	#DIV/0!	#DIV/0!	#DIV/0!	#DIV/0!	#DIV/0!	#DIV/0!	#DIV/0!
																						#DIV/0!	#N/A	#N/A		#DIV/0!		5												#DIV/0!	#DIV/0!	#DIV/0!	#DIV/0!	#DIV/0!	#DIV/0!	#DIV/0!	#DIV/0!	#DIV/0!	#DIV/0!
																						#DIV/0!	#N/A	#N/A		#DIV/0!		5												#DIV/0!	#DIV/0!	#DIV/0!	#DIV/0!	#DIV/0!	#DIV/0!	#DIV/0!	#DIV/0!	#DIV/0!	#DIV/0!
																						#DIV/0!	#N/A	#N/A		#DIV/0!		5												#DIV/0!	#DIV/0!	#DIV/0!	#DIV/0!	#DIV/0!	#DIV/0!	#DIV/0!	#DIV/0!	#DIV/0!	#DIV/0!
																						#DIV/0!	#N/A	#N/A		#DIV/0!		5												#DIV/0!	#DIV/0!	#DIV/0!	#DIV/0!	#DIV/0!	#DIV/0!	#DIV/0!	#DIV/0!	#DIV/0!	#DIV/0!
																						#DIV/0!	#N/A	#N/A		#DIV/0!		5												#DIV/0!	#DIV/0!	#DIV/0!	#DIV/0!	#DIV/0!	#DIV/0!	#DIV/0!	#DIV/0!	#DIV/0!	#DIV/0!
																						#DIV/0!	#N/A	#N/A		#DIV/0!		5												#DIV/0!	#DIV/0!	#DIV/0!	#DIV/0!	#DIV/0!	#DIV/0!	#DIV/0!	#DIV/0!	#DIV/0!	#DIV/0!
																						0.338983	0.338983	0.338001		-0.000982464	-0.000982464	5												#DIV/0!	#DIV/0!	#DIV/0!	#DIV/0!	#DIV/0!	#DIV/0!	#DIV/0!	#DIV/0!	#DIV/0!	#DIV/0!
																						0.198299	0.198299	0.255028		0.0567292	0.0567292	5
																						0.129799	0.129799	0.146868		0.0170686	0.0170686	5												1/s	0	0.05	0.1	0.15	0	0	0	0	0
																						0.0742997	0.0742997	0.0860462		0.0117464	0.0117464	5											1	0.8	1.50663	1.99061	2.47459	2.95857	#N/A	#N/A	#N/A	#N/A	#N/A
																						0.0344828	0.0344828	0.0470647		0.012582	0.012582	5											2	1.6	1.76317	2.48249	3.20182	3.92114	#N/A	#N/A	#N/A	#N/A	#N/A
																						#DIV/0!	#N/A	#N/A		#DIV/0!		5											3	4	2.53279	3.95814	5.38349	6.80884	#N/A	#N/A	#N/A	#N/A	#N/A
																						#DIV/0!	#N/A	#N/A		#DIV/0!		5											4	8	3.81549	6.41755	9.01961	11.6217	#N/A	#N/A	#N/A	#N/A	#N/A
																						#DIV/0!	#N/A	#N/A		#DIV/0!		5											5	16	6.38088	11.3364	16.2918	21.2473	#N/A	#N/A	#N/A	#N/A	#N/A
																						#DIV/0!	#N/A	#N/A		#DIV/0!		5											6	#N/A	#N/A	#N/A	#N/A	#N/A	#N/A	#N/A	#N/A	#N/A	#N/A
																						#DIV/0!	#N/A	#N/A		#DIV/0!		5											7	#N/A	#N/A	#N/A	#N/A	#N/A	#N/A	#N/A	#N/A	#N/A	#N/A
																						#DIV/0!	#N/A	#N/A		#DIV/0!		5											8	#N/A	#N/A	#N/A	#N/A	#N/A	#N/A	#N/A	#N/A	#N/A	#N/A
																						#DIV/0!	#N/A	#N/A		#DIV/0!		5											9	#N/A	#N/A	#N/A	#N/A	#N/A	#N/A	#N/A	#N/A	#N/A	#N/A
																						#DIV/0!	#N/A	#N/A		#DIV/0!		5											10	#N/A	#N/A	#N/A	#N/A	#N/A	#N/A	#N/A	#N/A	#N/A	#N/A
																						#DIV/0!	#N/A	#N/A		#DIV/0!		5											11	#N/A	#N/A	#N/A	#N/A	#N/A	#N/A	#N/A	#N/A	#N/A	#N/A
																						#DIV/0!	#N/A	#N/A		#DIV/0!		5											12	#N/A	#N/A	#N/A	#N/A	#N/A	#N/A	#N/A	#N/A	#N/A	#N/A
																						#DIV/0!	#N/A	#N/A		#DIV/0!		5											13	#N/A	#N/A	#N/A	#N/A	#N/A	#N/A	#N/A	#N/A	#N/A	#N/A
																						#DIV/0!	#N/A	#N/A		#DIV/0!		5											14	#N/A	#N/A	#N/A	#N/A	#N/A	#N/A	#N/A	#N/A	#N/A	#N/A
																						#DIV/0!	#N/A	#N/A		#DIV/0!		5											15	#N/A	#N/A	#N/A	#N/A	#N/A	#N/A	#N/A	#N/A	#N/A	#N/A
																						#DIV/0!	#N/A	#N/A		#DIV/0!		5
																						#DIV/0!	#N/A	#N/A		#DIV/0!		5
																						#DIV/0!	#N/A	#N/A		#DIV/0!		5
																						#DIV/0!	#N/A	#N/A		#DIV/0!		5
																						#DIV/0!	#N/A	#N/A		#DIV/0!		5
																						#DIV/0!	#N/A	#N/A		#DIV/0!		5
																						#DIV/0!	#N/A	#N/A		#DIV/0!		5
																						#DIV/0!	#N/A	#N/A		#DIV/0!		5
																						#DIV/0!	#N/A	#N/A		#DIV/0!		5
																						#DIV/0!	#N/A	#N/A		#DIV/0!		5
																						#DIV/0!	#N/A	#N/A		#DIV/0!		5
																						#DIV/0!	#N/A	#N/A		#DIV/0!		5
																						#DIV/0!	#N/A	#N/A		#DIV/0!		5
																						#DIV/0!	#N/A	#N/A		#DIV/0!		5
																						#DIV/0!	#N/A	#N/A		#DIV/0!		5
																						#DIV/0!	#N/A	#N/A		#DIV/0!		5
																						#DIV/0!	#N/A	#N/A		#DIV/0!		5
																						#DIV/0!	#N/A	#N/A		#DIV/0!		5
																						#DIV/0!	#N/A	#N/A		#DIV/0!		5
																						#DIV/0!	#N/A	#N/A		#DIV/0!		5
																						#DIV/0!	#N/A	#N/A		#DIV/0!		5
																						#DIV/0!	#N/A	#N/A		#DIV/0!		5
																						#DIV/0!	#N/A	#N/A		#DIV/0!		5
																						#DIV/0!	#N/A	#N/A		#DIV/0!		5
																						#DIV/0!	#N/A	#N/A		#DIV/0!		5
																						#DIV/0!	#N/A	#N/A		#DIV/0!		5
																						#DIV/0!	#N/A	#N/A		#DIV/0!		5
																						#DIV/0!	#N/A	#N/A		#DIV/0!		5
																						#DIV/0!	#N/A	#N/A		#DIV/0!		5
																						#DIV/0!	#N/A	#N/A		#DIV/0!		5
																						#DIV/0!	#N/A	#N/A		#DIV/0!		5
																						#DIV/0!	#N/A	#N/A		#DIV/0!		5
																						#DIV/0!	#N/A	#N/A		#DIV/0!		5
																						#DIV/0!	#N/A	#N/A		#DIV/0!		5
																						#DIV/0!	#N/A	#N/A		#DIV/0!		5
																						#DIV/0!	#N/A	#N/A		#DIV/0!		5
																						#DIV/0!	#N/A	#N/A		#DIV/0!		5
																						#DIV/0!	#N/A	#N/A		#DIV/0!		5
																						#DIV/0!	#N/A	#N/A		#DIV/0!		5
																						#DIV/0!	#N/A	#N/A		#DIV/0!		5
																						#DIV/0!	#N/A	#N/A		#DIV/0!		5
																						#DIV/0!	#N/A	#N/A		#DIV/0!		5
																						#DIV/0!	#N/A	#N/A		#DIV/0!		5
																						#DIV/0!	#N/A	#N/A		#DIV/0!		5
																						#DIV/0!	#N/A	#N/A		#DIV/0!		5
																						#DIV/0!	#N/A	#N/A		#DIV/0!		5
																						#DIV/0!	#N/A	#N/A		#DIV/0!		5
																						#DIV/0!	#N/A	#N/A		#DIV/0!		5
																						#DIV/0!	#N/A	#N/A		#DIV/0!		5
																						#DIV/0!	#N/A	#N/A		#DIV/0!		5
																						#DIV/0!	#N/A	#N/A		#DIV/0!		5
																						#DIV/0!	#N/A	#N/A		#DIV/0!		5
																						#DIV/0!	#N/A	#N/A		#DIV/0!		5
																						#DIV/0!	#N/A	#N/A		#DIV/0!		5
																						#DIV/0!	#N/A	#N/A		#DIV/0!		5
																						#DIV/0!	#N/A	#N/A		#DIV/0!		5
																						#DIV/0!	#N/A	#N/A		#DIV/0!		5
																						#DIV/0!	#N/A	#N/A		#DIV/0!		5
																						#DIV/0!	#N/A	#N/A		#DIV/0!		5
																						#DIV/0!	#N/A	#N/A		#DIV/0!		5
																						#DIV/0!	#N/A	#N/A		#DIV/0!		5
																						#DIV/0!	#N/A	#N/A		#DIV/0!		5
																						#DIV/0!	#N/A	#N/A		#DIV/0!		5
																						#DIV/0!	#N/A	#N/A		#DIV/0!		5
																						#DIV/0!	#N/A	#N/A		#DIV/0!		5
																						#DIV/0!	#N/A	#N/A		#DIV/0!		5
																						#DIV/0!	#N/A	#N/A		#DIV/0!		5
																						#DIV/0!	#N/A	#N/A		#DIV/0!		5
																						#DIV/0!	#N/A	#N/A		#DIV/0!		5
																						#DIV/0!	#N/A	#N/A		#DIV/0!		5
																						#DIV/0!	#N/A	#N/A		#DIV/0!		5
																						#DIV/0!	#N/A	#N/A		#DIV/0!		5
																						#DIV/0!	#N/A	#N/A		#DIV/0!		5
																						#DIV/0!	#N/A	#N/A		#DIV/0!		5
																						#DIV/0!	#N/A	#N/A		#DIV/0!		5
																						#DIV/0!	#N/A	#N/A		#DIV/0!		5
																						#DIV/0!	#N/A	#N/A		#DIV/0!		5
																						#DIV/0!	#N/A	#N/A		#DIV/0!		5
																						#DIV/0!	#N/A	#N/A		#DIV/0!		5
																						#DIV/0!	#N/A	#N/A		#DIV/0!		5
																						#DIV/0!	#N/A	#N/A		#DIV/0!		5
																						#DIV/0!	#N/A	#N/A		#DIV/0!		5
																						#DIV/0!	#N/A	#N/A		#DIV/0!		5
																						#DIV/0!	#N/A	#N/A		#DIV/0!		5
																						#DIV/0!	#N/A	#N/A		#DIV/0!		5
																						#DIV/0!	#N/A	#N/A		#DIV/0!		5
																						#DIV/0!	#N/A	#N/A		#DIV/0!		5
																						#DIV/0!	#N/A	#N/A		#DIV/0!		5
																						#DIV/0!	#N/A	#N/A		#DIV/0!		5
																						#DIV/0!	#N/A	#N/A		#DIV/0!		5
																						#DIV/0!	#N/A	#N/A		#DIV/0!		5
																						#DIV/0!	#N/A	#N/A		#DIV/0!		5
																						#DIV/0!	#N/A	#N/A		#DIV/0!		5
																						#DIV/0!	#N/A	#N/A		#DIV/0!		5
																						#DIV/0!	#N/A	#N/A		#DIV/0!		5
																						#DIV/0!	#N/A	#N/A		#DIV/0!		5
																						#DIV/0!	#N/A	#N/A		#DIV/0!		5
																						#DIV/0!	#N/A	#N/A		#DIV/0!		5
																						#DIV/0!	#N/A	#N/A		#DIV/0!		5
																						#DIV/0!	#N/A	#N/A		#DIV/0!		5
																						#DIV/0!	#N/A	#N/A		#DIV/0!		5
																						#DIV/0!	#N/A	#N/A		#DIV/0!		5
																						#DIV/0!	#N/A	#N/A		#DIV/0!		5
																						#DIV/0!	#N/A	#N/A		#DIV/0!		5
																						#DIV/0!	#N/A	#N/A		#DIV/0!		5
																						#DIV/0!	#N/A	#N/A		#DIV/0!		5
																						#DIV/0!	#N/A	#N/A		#DIV/0!		5
																						#DIV/0!	#N/A	#N/A		#DIV/0!		5
																						#DIV/0!	#N/A	#N/A		#DIV/0!		5
																						#DIV/0!	#N/A	#N/A		#DIV/0!		5
																						#DIV/0!	#N/A	#N/A		#DIV/0!		5
																						#DIV/0!	#N/A	#N/A		#DIV/0!		5
																						#DIV/0!	#N/A	#N/A		#DIV/0!		5
																						#DIV/0!	#N/A	#N/A		#DIV/0!		5
																						#DIV/0!	#N/A	#N/A		#DIV/0!		5
																						#DIV/0!	#N/A	#N/A		#DIV/0!		5
																						#DIV/0!	#N/A	#N/A		#DIV/0!		5
																						#DIV/0!	#N/A	#N/A		#DIV/0!		5
																						#DIV/0!	#N/A	#N/A		#DIV/0!		5
																						#DIV/0!	#N/A	#N/A		#DIV/0!		5
																						#DIV/0!	#N/A	#N/A		#DIV/0!		5
																						#DIV/0!	#N/A	#N/A		#DIV/0!		5
																						#DIV/0!	#N/A	#N/A		#DIV/0!		5
																						#DIV/0!	#N/A	#N/A		#DIV/0!		5
																						#DIV/0!	#N/A	#N/A		#DIV/0!		5
																						#DIV/0!	#N/A	#N/A		#DIV/0!		5
																						#DIV/0!	#N/A	#N/A		#DIV/0!		5
																						#DIV/0!	#N/A	#N/A		#DIV/0!		5
																						#DIV/0!	#N/A	#N/A		#DIV/0!		5
																						#DIV/0!	#N/A	#N/A		#DIV/0!		5
																						#DIV/0!	#N/A	#N/A		#DIV/0!		5
																						#DIV/0!	#N/A	#N/A		#DIV/0!		5
																						#DIV/0!	#N/A	#N/A		#DIV/0!		5
																						#DIV/0!	#N/A	#N/A		#DIV/0!		5
																						#DIV/0!	#N/A	#N/A		#DIV/0!		5
																						#DIV/0!	#N/A	#N/A		#DIV/0!		5
																						#DIV/0!	#N/A	#N/A		#DIV/0!		5
																						#DIV/0!	#N/A	#N/A		#DIV/0!		5
																						#DIV/0!	#N/A	#N/A		#DIV/0!		5
																						#DIV/0!	#N/A	#N/A		#DIV/0!		5
																						#DIV/0!	#N/A	#N/A		#DIV/0!		5
																						#DIV/0!	#N/A	#N/A		#DIV/0!		5
																						#DIV/0!	#N/A	#N/A		#DIV/0!		5
																						#DIV/0!	#N/A	#N/A		#DIV/0!		5
																						#DIV/0!	#N/A	#N/A		#DIV/0!		5
																						#DIV/0!	#N/A	#N/A		#DIV/0!		5
																						#DIV/0!	#N/A	#N/A		#DIV/0!		5
																						#DIV/0!	#N/A	#N/A		#DIV/0!		5
																						#DIV/0!	#N/A	#N/A		#DIV/0!		5
																						#DIV/0!	#N/A	#N/A		#DIV/0!		5
																						#DIV/0!	#N/A	#N/A		#DIV/0!		5
																						#DIV/0!	#N/A	#N/A		#DIV/0!		5
																						#DIV/0!	#N/A	#N/A		#DIV/0!		5
																						#DIV/0!	#N/A	#N/A		#DIV/0!		5
																						#DIV/0!	#N/A	#N/A		#DIV/0!		5
																						#DIV/0!	#N/A	#N/A		#DIV/0!		5
																						#DIV/0!	#N/A	#N/A		#DIV/0!		5
																						#DIV/0!	#N/A	#N/A		#DIV/0!		5
																						#DIV/0!	#N/A	#N/A		#DIV/0!		5
																						#DIV/0!	#N/A	#N/A		#DIV/0!		5
																						#DIV/0!	#N/A	#N/A		#DIV/0!		5
																						#DIV/0!	#N/A	#N/A		#DIV/0!		5
																						#DIV/0!	#N/A	#N/A		#DIV/0!		5
																						#DIV/0!	#N/A	#N/A		#DIV/0!		5
																						#DIV/0!	#N/A	#N/A		#DIV/0!		5
																						#DIV/0!	#N/A	#N/A		#DIV/0!		5
																						#DIV/0!	#N/A	#N/A		#DIV/0!		5
																						#DIV/0!	#N/A	#N/A		#DIV/0!		5
																						#DIV/0!	#N/A	#N/A		#DIV/0!		5
																						#DIV/0!	#N/A	#N/A		#DIV/0!		5
																						#DIV/0!	#N/A	#N/A		#DIV/0!		5
																						#DIV/0!	#N/A	#N/A		#DIV/0!		5
																						#DIV/0!	#N/A	#N/A		#DIV/0!		5
																						#DIV/0!	#N/A	#N/A		#DIV/0!		5
																						#DIV/0!	#N/A	#N/A		#DIV/0!		5
																						#DIV/0!	#N/A	#N/A		#DIV/0!		5
																						#DIV/0!	#N/A	#N/A		#DIV/0!		5
[truncated: 54 more columns]
