# Supplementary material for: Comparing enzyme activity modifier equations through the development of global data fitting templates in Excel
Source: PeerJ. 2018 Dec 14;6:e6082. doi: 10.7717/peerj.6082 (PMC6296338; doi:10.7717/peerj.6082)
Supplement: Supplemental Information 20 [file peerj-06-6082-s020.xlsx]

## Sheet: Raw data and fitting summary
		No Inhibitor	[I]1	[I]2	[I]3	[I]4	[I]5	[I]6	[I]7	[I]8	[I]9	[I]10	[I]11	[I]12	[I]13	[I]14	[I]15
		0	0.0439805	0.0549756	0.0687195	0.0858993	0.107374	0.134218	0.167772	0.209715	0.262144	0.32768	0.4096	0.512	0.64	0.8	1
[S]1	1	13.6364	10.1892	9.58357	8.92075	8.2109	7.46807	6.70934	5.9533	5.21827	4.5206	3.87329	3.28526	2.76126	2.30224	1.90616	1.56879
[S]2	0.8	13.3333	9.9628	9.37061	8.72251	8.02843	7.30211	6.56025	5.82101	5.10231	4.42014	3.78722	3.21226	2.6999	2.25108	1.8638	1.53392
[S]3	0.64	12.973	9.69354	9.11735	8.48677	7.81145	7.10476	6.38294	5.66368	4.96441	4.30068	3.68486	3.12544	2.62693	2.19024	1.81343	1.49247
[S]4	0.512	12.549	9.37676	8.81939	8.20942	7.55617	6.87258	6.17435	5.47859	4.80218	4.16014	3.56444	3.0233	2.54108	2.11867	1.75416	1.44369
[S]5	0.4096	12.0565	9.00875	8.47326	7.88723	7.25962	6.60285	5.93203	5.26358	4.61371	3.99687	3.42455	2.90465	2.44135	2.03552	1.68532	1.38703
[S]6	0.32768	11.4927	8.58747	8.07702	7.5184	6.92013	6.29408	5.65462	5.01743	4.39795	3.80996	3.2644	2.76881	2.32718	1.94033	1.60651	1.32217
[S]7	0.262144	10.858	8.11321	7.63095	7.10318	6.53795	5.94648	5.34234	4.74034	4.15507	3.59955	3.08412	2.6159	2.19866	1.83317	1.51779	1.24915
[S]8	0.209715	10.1568	7.5893	7.13818	6.64449	6.11576	5.56248	4.99735	4.43423	3.88675	3.3671	2.88496	2.44698	2.05668	1.71479	1.41977	1.16849
[S]9	0.167772	9.39822	7.02245	6.60503	6.14821	5.65897	5.14702	4.6241	4.10303	3.59645	3.11561	2.66948	2.26421	1.90307	1.58671	1.31373	1.08121
[S]10	0.134218	8.5957	6.4228	6.04102	5.62321	5.17575	4.70751	4.22924	3.75267	3.28935	2.84957	2.44153	2.07087	1.74056	1.45122	1.20155	0.988886
[S]11	0.107374	7.7667	5.80336	5.4584	5.08088	4.67658	4.2535	3.82136	3.39075	2.97211	2.57474	2.20606	1.87115	1.5727	1.31126	1.08567	0.893514
[S]12	0.0858993	6.93112	5.179	4.87116	4.53426	4.17345	3.79589	3.41024	3.02596	2.65235	2.29774	1.96872	1.66984	1.4035	1.17019	0.968866	0.797385
[S]13	0.0687195	6.1095	4.56508	4.29373	3.99677	3.67873	3.34592	3.00599	2.66726	2.33794	2.02537	1.73535	1.4719	1.23713	1.03147	0.854017	0.702863
[S]14	0.0549756	5.32106	3.97595	3.73961	3.48097	3.20398	2.91412	2.61806	2.32304	2.03623	1.76399	1.5114	1.28194	1.07747	0.89836	0.743804	0.612157
[S]15	0.0439805	4.58192	3.42366	3.22015	2.99744	2.75892	2.50933	2.25439	2.00035	1.75338	1.51896	1.30145	1.10387	0.927803	0.773571	0.640483	0.527124
		Direct linear plot Km, Vmax estimates
							0.686572	1	13.6364	1	1	1	13.6364	1	13.6364
		Km	0.1				0.686572	0.8	13.3333	1	1	0.8	13.3333	0.8	13.3333
		Vmax	15					0.64	12.973	1	1	0.64	12.973	0.64	12.973
								0.512	12.549	1	1	0.512	12.549	0.512	12.549
	Ki estimate based on linear decrease in activity							0.4096	12.0565	1	1	0.4096	12.0565	0.4096	12.0565
								0.32768	11.4927	1	1	0.32768	11.4927	0.32768	11.4927
		Ki	0.686572					0.262144	10.858	1	1	0.262144	10.858	0.262144	10.858
								0.209715	10.1568	1	1	0.209715	10.1568	0.209715	10.1568
								0.167772	9.39822	1	1	0.167772	9.39822	0.167772	9.39822
								0.134218	8.5957	1	1	0.134218	8.5957	0.134218	8.5957
								0.107374	7.7667	1	1	0.107374	7.7667	0.107374	7.7667
								0.0858993	6.93112	1	1	0.0858993	6.93112	0.0858993	6.93112
								0.0687195	6.1095	1	1	0.0687195	6.1095	0.0687195	6.1095
								0.0549756	5.32106	1	1	0.0549756	5.32106	0.0549756	5.32106
								0.0439805	4.58192	1	1	0.0439805	4.58192	0.0439805	4.58192
			Km	Km2	Vmax	Vmax2	Ki	b	RSS	RSE	n	k	BIC
		Partial Non-competitive	0.1		15	0	0.13		1.18613e-28	7.0894e-16	240	4	-7263.94
		Partial Competitive	0.100001	0.099921	1.72543		0.130088		1.53723e-05	0.000255219	240	4	-1716.91
		Partial Uncompetitive	0.141751		13.4242	0	0.594309		860.012	1.90896	240	4	142.551
		Partial Mixed Non-competitive	0.0999978	0.100001	14.9999		0.130002	0	4.44334e-08	1.37506e-05	240	5	-2323.9
		Modifier equation	0.1	0.1	15	0	0.13		2.07532e-28	9.39742e-16	240	5	-7203.25
													Residual distribution
													Partial Non-competitive	Partial Competitive	Partial Uncompetitive	Partial Mixed Non-competitive	Modifier equation
												Minimum value	0	-0.000356602	-6.27813	-8.22485e-05	0
												First quartile	0	-0.000113249	-0.773671	2.60325e-07	0
												Median value	0	0.000131409	0.747558	2.8481e-06	0
					Partial Non-competitive	Partial Competitive	Partial Uncompetitive	Partial Mixed Non-competitive	Modifier equation			Third quartile	0	0.000294472	1.78208	4.11027e-06	0
				Q1	0	-0.000113249	-0.773671	2.60325e-07	0			Maximum value	0	0.000450104	2.32797	3.23315e-05	0
				Min	0	-0.000356602	-6.27813	-8.22485e-05	0
				Median	0	0.000131409	0.747558	2.8481e-06	0
				Max	0	0.000450104	2.32797	3.23315e-05	0
				Q3	0	0.000294472	1.78208	4.11027e-06	0
	Partial Non-competitive
	Km	0.1
	Vmax	15
	bVmax	0
	Ki	0.13
	RSS	1.18613e-28
	Partial Competitive
	Km	0.100001
	Km2	0.099921
	Vmax	1.72543
	Ki	0.130088
	RSS	1.53723e-05
	Partial Uncompetitive
	Km	0.141751
	Vmax	13.4242
	Vmax2	0
	Ki	0.594309
	RSS	860.012
	Partial Mixed Non-competitive
	Km	0.0999978
	Km2	0.100001
	Vmax	14.9999
	Ki	0.130002
	b	0
	RSS	4.44334e-08
	Modifier equation
	Km	0.1
	Km2	0.1
	Vmax	15
	Vmax2	0
	Kx	0.13
	RSS	2.07532e-28

## Sheet: modified direct linear plot
Km/Vmax direct plot
									Intercept points x-axis																				Intercept points x-axis
										Line 1	Line 2	Line 3	Line 4	Line 5	Line 6	Line 7	Line 8	Line 9	Line 10	Line 11	Line 12	Line 13	Line 14	Line 15						Line 1	Line 2	Line 3	Line 4	Line 5	Line 6	Line 7	Line 8	Line 9	Line 10	Line 11	Line 12	Line 13	Line 14	Line 15
			x-intercept	y-interecept					Line 1																				Line 1
[Substrate]		v	[Substrate]/v	1/v					Line 2	0.00666667																			Line 2	0.00666667
1		13.6364	0.0733333	0.0733333					Line 3	0.00666667	0.00666667																		Line 3	0.00666667	0.00666667
0.8		13.3333	0.06	0.075					Line 4	0.00666667	0.00666667	0.00666667																	Line 4	0.00666667	0.00666667	0.00666667
0.64		12.973	0.0493333	0.0770833					Line 5	0.00666667	0.00666667	0.00666667	0.00666667																Line 5	0.00666667	0.00666667	0.00666667	0.00666667
0.512		12.549	0.0408	0.0796875					Line 6	0.00666667	0.00666667	0.00666667	0.00666667	0.00666667															Line 6	0.00666667	0.00666667	0.00666667	0.00666667	0.00666667
0.4096		12.0565	0.0339733	0.0829427					Line 7	0.00666667	0.00666667	0.00666667	0.00666667	0.00666667	0.00666667														Line 7	0.00666667	0.00666667	0.00666667	0.00666667	0.00666667	0.00666667
0.32768		11.4927	0.028512	0.0870117					Line 8	0.00666667	0.00666667	0.00666667	0.00666667	0.00666667	0.00666667	0.00666667													Line 8	0.00666667	0.00666667	0.00666667	0.00666667	0.00666667	0.00666667	0.00666667
0.262144		10.858	0.0241429	0.092098					Line 9	0.00666667	0.00666667	0.00666667	0.00666667	0.00666667	0.00666667	0.00666667	0.00666667												Line 9	0.00666667	0.00666667	0.00666667	0.00666667	0.00666667	0.00666667	0.00666667	0.00666667
0.209715		10.1568	0.0206477	0.0984558					Line 10	0.00666667	0.00666667	0.00666667	0.00666667	0.00666667	0.00666667	0.00666667	0.00666667	0.00666667											Line 10	0.00666667	0.00666667	0.00666667	0.00666667	0.00666667	0.00666667	0.00666667	0.00666667	0.00666667
0.167772		9.39822	0.0178515	0.106403					Line 11	0.00666667	0.00666667	0.00666667	0.00666667	0.00666667	0.00666667	0.00666667	0.00666667	0.00666667	0.00666667										Line 11	0.00666667	0.00666667	0.00666667	0.00666667	0.00666667	0.00666667	0.00666667	0.00666667	0.00666667	0.00666667
0.134218		8.5957	0.0156145	0.116337					Line 12	0.00666667	0.00666667	0.00666667	0.00666667	0.00666667	0.00666667	0.00666667	0.00666667	0.00666667	0.00666667	0.00666667									Line 12	0.00666667	0.00666667	0.00666667	0.00666667	0.00666667	0.00666667	0.00666667	0.00666667	0.00666667	0.00666667	0.00666667
0.107374		7.7667	0.0138249	0.128755					Line 13	0.00666667	0.00666667	0.00666667	0.00666667	0.00666667	0.00666667	0.00666667	0.00666667	0.00666667	0.00666667	0.00666667	0.00666667								Line 13	0.00666667	0.00666667	0.00666667	0.00666667	0.00666667	0.00666667	0.00666667	0.00666667	0.00666667	0.00666667	0.00666667	0.00666667
0.0858993		6.93112	0.0123933	0.144277					Line 14	0.00666667	0.00666667	0.00666667	0.00666667	0.00666667	0.00666667	0.00666667	0.00666667	0.00666667	0.00666667	0.00666667	0.00666667	0.00666667							Line 14	0.00666667	0.00666667	0.00666667	0.00666667	0.00666667	0.00666667	0.00666667	0.00666667	0.00666667	0.00666667	0.00666667	0.00666667	0.00666667
0.0687195		6.1095	0.011248	0.163679					Line 15	0.00666667	0.00666667	0.00666667	0.00666667	0.00666667	0.00666667	0.00666667	0.00666667	0.00666667	0.00666667	0.00666667	0.00666667	0.00666667	0.00666667						Line 15	0.00666667	0.00666667	0.00666667	0.00666667	0.00666667	0.00666667	0.00666667	0.00666667	0.00666667	0.00666667	0.00666667	0.00666667	0.00666667	0.00666667
0.0549756		5.32106	0.0103317	0.187933
0.0439805		4.58192	0.0095987	0.218249
																														Km/Vmax (x-axis):	0.00666667		Km:	0.1
																														Standard dev:	1.6544e-17
Line 1	x	y
	0	0.0733333		Slope:	-1
	0.0733333	0		y-intercept:	0.0733333				1/Intercept points y-axis																				1/Intercept points y-axis
										Line 1	Line 2	Line 3	Line 4	Line 5	Line 6	Line 7	Line 8	Line 9	Line 10	Line 11	Line 12	Line 13	Line 14	Line 15						Line 1	Line 2	Line 3	Line 4	Line 5	Line 6	Line 7	Line 8	Line 9	Line 10	Line 11	Line 12	Line 13	Line 14	Line 15
Line 2	x	y							Line 1																				Line 1
	0	0.075		Slope:	-1.25				Line 2	15																			Line 2	15
	0.06	0		y-intercept:	0.075				Line 3	15	15																		Line 3	15	15
									Line 4	15	15	15																	Line 4	15	15	15
Line 3	x	y							Line 5	15	15	15	15																Line 5	15	15	15	15
	0	0.0770833		Slope:	-1.5625				Line 6	15	15	15	15	15															Line 6	15	15	15	15	15
	0.0493333	0		y-intercept:	0.0770833				Line 7	15	15	15	15	15	15														Line 7	15	15	15	15	15	15
									Line 8	15	15	15	15	15	15	15													Line 8	15	15	15	15	15	15	15
Line 4	x	y							Line 9	15	15	15	15	15	15	15	15												Line 9	15	15	15	15	15	15	15	15
	0	0.0796875		Slope:	-1.95312				Line 10	15	15	15	15	15	15	15	15	15											Line 10	15	15	15	15	15	15	15	15	15
	0.0408	0		y-intercept:	0.0796875				Line 11	15	15	15	15	15	15	15	15	15	15										Line 11	15	15	15	15	15	15	15	15	15	15
									Line 12	15	15	15	15	15	15	15	15	15	15	15									Line 12	15	15	15	15	15	15	15	15	15	15	15
Line 5	x	y							Line 13	15	15	15	15	15	15	15	15	15	15	15	15								Line 13	15	15	15	15	15	15	15	15	15	15	15	15
	0	0.0829427		Slope:	-2.44141				Line 14	15	15	15	15	15	15	15	15	15	15	15	15	15							Line 14	15	15	15	15	15	15	15	15	15	15	15	15	15
	0.0339733	0		y-intercept:	0.0829427				Line 15	15	15	15	15	15	15	15	15	15	15	15	15	15	15						Line 15	15	15	15	15	15	15	15	15	15	15	15	15	15	15
Line 6	x	y
	0	0.0870117		Slope:	-3.05176
	0.028512	0		y-intercept:	0.0870117
Line 7	x	y																												Vmax:	15
	0	0.092098		Slope:	-3.8147																									Standard dev:	1.10385e-14
	0.0241429	0		y-intercept:	0.092098
Line 8	x	y
	0	0.0984558		Slope:	-4.76837
	0.0206477	0		y-intercept:	0.0984558
Line 9	x	y
	0	0.106403		Slope:	-5.96046
	0.0178515	0		y-intercept:	0.106403
Line 10	x	y
	0	0.116337		Slope:	-7.45058
	0.0156145	0		y-intercept:	0.116337
Line 11	x	y										0	0.0733333	0.075	0.0770833	0.0796875	0.0829427	0.0870117	0.092098	0.0984558	0.106403	0.116337	0.128755	0.144277	0.163679	0.187933	0.218249	0	0	0	0
	0	0.128755		Slope:	-9.31323							0.0733333	0
	0.0138249	0		y-intercept:	0.128755							0.06		0
												0.0493333			0
Line 12	x	y										0.0408				0
	0	0.144277		Slope:	-11.6415							0.0339733					0
	0.0123933	0		y-intercept:	0.144277							0.028512						0
												0.0241429							0
Line 13	x	y										0.0206477								0
	0	0.163679		Slope:	-14.5519							0.0178515									0
	0.011248	0		y-intercept:	0.163679							0.0156145										0
												0.0138249											0
Line 14	x	y										0.0123933												0
	0	0.187933		Slope:	-18.1899							0.011248													0
	0.0103317	0		y-intercept:	0.187933							0.0103317														0
												0.0095987															0
Line 15	x	y										0																0
	0	0.218249		Slope:	-22.7374							0																	0
	0.0095987	0		y-intercept:	0.218249							0																		0
												0																			0

## Sheet: Part Non-competitive
														(V_max*([S]/K_s )+bV_max*(([S]*[I])/(K_s*K_i )))/((1+([S]/K_s )+([I]/K_i )+(([S]*[I])/(K_s*K_i ))) )									Calculated values
		No Inhibitor	[I]1	[I]2	[I]3	[I]4	[I]5	[I]6	[I]7	[I]8	[I]9	[I]10	[I]11	[I]12	[I]13	[I]14	[I]15						No Inhibitor	[I]1	[I]2	[I]3	[I]4	[I]5	[I]6	[I]7	[I]8	[I]9	[I]10	[I]11	[I]12	[I]13	[I]14	[I]15
		0	0.0439805	0.0549756	0.0687195	0.0858993	0.107374	0.134218	0.167772	0.209715	0.262144	0.32768	0.4096	0.512	0.64	0.8	1	Km	Vmax	bVmax	Ki		0	0.0439805	0.0549756	0.0687195	0.0858993	0.107374	0.134218	0.167772	0.209715	0.262144	0.32768	0.4096	0.512	0.64	0.8	1
[S]1	1	13.6364	10.1892	9.58357	8.92075	8.2109	7.46807	6.70934	5.9533	5.21827	4.5206	3.87329	3.28526	2.76126	2.30224	1.90616	1.56879	0.1	15	0	0.13		13.6364	10.1892	9.58357	8.92075	8.2109	7.46807	6.70934	5.9533	5.21827	4.5206	3.87329	3.28526	2.76126	2.30224	1.90616	1.56879		13.6364	10.1892	9.58357	8.92075	8.2109	7.46807	6.70934	5.9533	5.21827	4.5206
[S]2	0.8	13.3333	9.9628	9.37061	8.72251	8.02843	7.30211	6.56025	5.82101	5.10231	4.42014	3.78722	3.21226	2.6999	2.25108	1.8638	1.53392						13.3333	9.9628	9.37061	8.72251	8.02843	7.30211	6.56025	5.82101	5.10231	4.42014	3.78722	3.21226	2.6999	2.25108	1.8638	1.53392		13.3333	9.9628	9.37061	8.72251	8.02843	7.30211	6.56025	5.82101	5.10231	4.42014
[S]3	0.64	12.973	9.69354	9.11735	8.48677	7.81145	7.10476	6.38294	5.66368	4.96441	4.30068	3.68486	3.12544	2.62693	2.19024	1.81343	1.49247						12.973	9.69354	9.11735	8.48677	7.81145	7.10476	6.38294	5.66368	4.96441	4.30068	3.68486	3.12544	2.62693	2.19024	1.81343	1.49247		12.973	9.69354	9.11735	8.48677	7.81145	7.10476	6.38294	5.66368	4.96441	4.30068
[S]4	0.512	12.549	9.37676	8.81939	8.20942	7.55617	6.87258	6.17435	5.47859	4.80218	4.16014	3.56444	3.0233	2.54108	2.11867	1.75416	1.44369						12.549	9.37676	8.81939	8.20942	7.55617	6.87258	6.17435	5.47859	4.80218	4.16014	3.56444	3.0233	2.54108	2.11867	1.75416	1.44369		12.549	9.37676	8.81939	8.20942	7.55617	6.87258	6.17435	5.47859	4.80218	4.16014
[S]5	0.4096	12.0565	9.00875	8.47326	7.88723	7.25962	6.60285	5.93203	5.26358	4.61371	3.99687	3.42455	2.90465	2.44135	2.03552	1.68532	1.38703						12.0565	9.00875	8.47326	7.88723	7.25962	6.60285	5.93203	5.26358	4.61371	3.99687	3.42455	2.90465	2.44135	2.03552	1.68532	1.38703		12.0565	9.00875	8.47326	7.88723	7.25962	6.60285	5.93203	5.26358	4.61371	3.99687
[S]6	0.32768	11.4927	8.58747	8.07702	7.5184	6.92013	6.29408	5.65462	5.01743	4.39795	3.80996	3.2644	2.76881	2.32718	1.94033	1.60651	1.32217			Sum R2	1.18613e-28		11.4927	8.58747	8.07702	7.5184	6.92013	6.29408	5.65462	5.01743	4.39795	3.80996	3.2644	2.76881	2.32718	1.94033	1.60651	1.32217		11.4927	8.58747	8.07702	7.5184	6.92013	6.29408	5.65462	5.01743	4.39795	3.80996
[S]7	0.262144	10.858	8.11321	7.63095	7.10318	6.53795	5.94648	5.34234	4.74034	4.15507	3.59955	3.08412	2.6159	2.19866	1.83317	1.51779	1.24915			Sum residuals %	2.787e-14		10.858	8.11321	7.63095	7.10318	6.53795	5.94648	5.34234	4.74034	4.15507	3.59955	3.08412	2.6159	2.19866	1.83317	1.51779	1.24915		10.858	8.11321	7.63095	7.10318	6.53795	5.94648	5.34234	4.74034	4.15507	3.59955
[S]8	0.209715	10.1568	7.5893	7.13818	6.64449	6.11576	5.56248	4.99735	4.43423	3.88675	3.3671	2.88496	2.44698	2.05668	1.71479	1.41977	1.16849						10.1568	7.5893	7.13818	6.64449	6.11576	5.56248	4.99735	4.43423	3.88675	3.3671	2.88496	2.44698	2.05668	1.71479	1.41977	1.16849		10.1568	7.5893	7.13818	6.64449	6.11576	5.56248	4.99735	4.43423	3.88675	3.3671
[S]9	0.167772	9.39822	7.02245	6.60503	6.14821	5.65897	5.14702	4.6241	4.10303	3.59645	3.11561	2.66948	2.26421	1.90307	1.58671	1.31373	1.08121						9.39822	7.02245	6.60503	6.14821	5.65897	5.14702	4.6241	4.10303	3.59645	3.11561	2.66948	2.26421	1.90307	1.58671	1.31373	1.08121		9.39822	7.02245	6.60503	6.14821	5.65897	5.14702	4.6241	4.10303	3.59645	3.11561
[S]10	0.134218	8.5957	6.4228	6.04102	5.62321	5.17575	4.70751	4.22924	3.75267	3.28935	2.84957	2.44153	2.07087	1.74056	1.45122	1.20155	0.988886						8.5957	6.4228	6.04102	5.62321	5.17575	4.70751	4.22924	3.75267	3.28935	2.84957	2.44153	2.07087	1.74056	1.45122	1.20155	0.988886		8.5957	6.4228	6.04102	5.62321	5.17575	4.70751	4.22924	3.75267	3.28935	2.84957
[S]11	0.107374	7.7667	5.80336	5.4584	5.08088	4.67658	4.2535	3.82136	3.39075	2.97211	2.57474	2.20606	1.87115	1.5727	1.31126	1.08567	0.893514						7.7667	5.80336	5.4584	5.08088	4.67658	4.2535	3.82136	3.39075	2.97211	2.57474	2.20606	1.87115	1.5727	1.31126	1.08567	0.893514		7.7667	5.80336	5.4584	5.08088	4.67658	4.2535	3.82136	3.39075	2.97211	2.57474
[S]12	0.0858993	6.93112	5.179	4.87116	4.53426	4.17345	3.79589	3.41024	3.02596	2.65235	2.29774	1.96872	1.66984	1.4035	1.17019	0.968866	0.797385						6.93112	5.179	4.87116	4.53426	4.17345	3.79589	3.41024	3.02596	2.65235	2.29774	1.96872	1.66984	1.4035	1.17019	0.968866	0.797385		6.93112	5.179	4.87116	4.53426	4.17345	3.79589	3.41024	3.02596	2.65235	2.29774
[S]13	0.0687195	6.1095	4.56508	4.29373	3.99677	3.67873	3.34592	3.00599	2.66726	2.33794	2.02537	1.73535	1.4719	1.23713	1.03147	0.854017	0.702863						6.1095	4.56508	4.29373	3.99677	3.67873	3.34592	3.00599	2.66726	2.33794	2.02537	1.73535	1.4719	1.23713	1.03147	0.854017	0.702863		6.1095	4.56508	4.29373	3.99677	3.67873	3.34592	3.00599	2.66726	2.33794	2.02537
[S]14	0.0549756	5.32106	3.97595	3.73961	3.48097	3.20398	2.91412	2.61806	2.32304	2.03623	1.76399	1.5114	1.28194	1.07747	0.89836	0.743804	0.612157						5.32106	3.97595	3.73961	3.48097	3.20398	2.91412	2.61806	2.32304	2.03623	1.76399	1.5114	1.28194	1.07747	0.89836	0.743804	0.612157		5.32106	3.97595	3.73961	3.48097	3.20398	2.91412	2.61806	2.32304	2.03623	1.76399
[S]15	0.0439805	4.58192	3.42366	3.22015	2.99744	2.75892	2.50933	2.25439	2.00035	1.75338	1.51896	1.30145	1.10387	0.927803	0.773571	0.640483	0.527124						4.58192	3.42366	3.22015	2.99744	2.75892	2.50933	2.25439	2.00035	1.75338	1.51896	1.30145	1.10387	0.927803	0.773571	0.640483	0.527124		4.58192	3.42366	3.22015	2.99744	2.75892	2.50933	2.25439	2.00035	1.75338	1.51896
	1	1	1	1	1	1	1	1	1	1	1	1	1	1	1	1	1																					1	1	13.6364	10.1892	9.58357	8.92075	8.2109	7.46807	6.70934	5.9533	5.21827	4.5206
	1	1	1	1	1	1	1	1	1	1	1	1	1	1	1	1	1					13.6364	13.6364	13.6364		0	0	1										0.8	0.8	13.3333	9.9628	9.37061	8.72251	8.02843	7.30211	6.56025	5.82101	5.10231	4.42014
	1	1	1	1	1	1	1	1	1	1	1	1	1	1	1	1	1					13.3333	13.3333	13.3333		0	0	1										0.64	0.64	12.973	9.69354	9.11735	8.48677	7.81145	7.10476	6.38294	5.66368	4.96441	4.30068
	1	1	1	1	1	1	1	1	1	1	1	1	1	1	1	1	1					12.973	12.973	12.973		0	0	1										0.512	0.512	12.549	9.37676	8.81939	8.20942	7.55617	6.87258	6.17435	5.47859	4.80218	4.16014
	1	1	1	1	1	1	1	1	1	1	1	1	1	1	1	1	1					12.549	12.549	12.549		0	0	1										0.4096	0.4096	12.0565	9.00875	8.47326	7.88723	7.25962	6.60285	5.93203	5.26358	4.61371	3.99687
	1	1	1	1	1	1	1	1	1	1	1	1	1	1	1	1	1					12.0565	12.0565	12.0565		0	0	1										0.32768	0.32768	11.4927	8.58747	8.07702	7.5184	6.92013	6.29408	5.65462	5.01743	4.39795	3.80996
	1	1	1	1	1	1	1	1	1	1	1	1	1	1	1	1	1					11.4927	11.4927	11.4927		0	0	1										0.262144	0.262144	10.858	8.11321	7.63095	7.10318	6.53795	5.94648	5.34234	4.74034	4.15507	3.59955
	1	1	1	1	1	1	1	1	1	1	1	1	1	1	1	1	1					10.858	10.858	10.858		0	0	1										0.209715	0.209715	10.1568	7.5893	7.13818	6.64449	6.11576	5.56248	4.99735	4.43423	3.88675	3.3671
	1	1	1	1	1	1	1	1	1	1	1	1	1	1	1	1	1					10.1568	10.1568	10.1568		0	0	1										0.167772	0.167772	9.39822	7.02245	6.60503	6.14821	5.65897	5.14702	4.6241	4.10303	3.59645	3.11561
	1	1	1	1	1	1	1	1	1	1	1	1	1	1	1	1	1					9.39822	9.39822	9.39822		0	0	1										0.134218	0.134218	8.5957	6.4228	6.04102	5.62321	5.17575	4.70751	4.22924	3.75267	3.28935	2.84957
	1	1	1	1	1	1	1	1	1	1	1	1	1	1	1	1	1					8.5957	8.5957	8.5957		0	0	1										0.107374	0.107374	7.7667	5.80336	5.4584	5.08088	4.67658	4.2535	3.82136	3.39075	2.97211	2.57474
	1	1	1	1	1	1	1	1	1	1	1	1	1	1	1	1	1					7.7667	7.7667	7.7667		0	0	1										0.0858993	0.0858993	6.93112	5.179	4.87116	4.53426	4.17345	3.79589	3.41024	3.02596	2.65235	2.29774
	1	1	1	1	1	1	1	1	1	1	1	1	1	1	1	1	1					6.93112	6.93112	6.93112		0	0	1										0.0687195	0.0687195	6.1095	4.56508	4.29373	3.99677	3.67873	3.34592	3.00599	2.66726	2.33794	2.02537
	1	1	1	1	1	1	1	1	1	1	1	1	1	1	1	1	1					6.1095	6.1095	6.1095		0	0	1										0.0549756	0.0549756	5.32106	3.97595	3.73961	3.48097	3.20398	2.91412	2.61806	2.32304	2.03623	1.76399
	1	1	1	1	1	1	1	1	1	1	1	1	1	1	1	1	1					5.32106	5.32106	5.32106		0	0	1										0.0439805	0.0439805	4.58192	3.42366	3.22015	2.99744	2.75892	2.50933	2.25439	2.00035	1.75338	1.51896
																						4.58192	4.58192	4.58192		0	0	1
		1	1	1	1	1	1	1	1	1	1	1	1	1	1	1	1					10.1892	10.1892	10.1892		0	0	1											1	0.0733333	0.0981428	0.104345	0.112098	0.121789	0.133903	0.149046	0.167974	0.191634	0.221209
		1	1	1	1	1	1	1	1	1	1	1	1	1	1	1	1					9.9628	9.9628	9.9628		0	0	1											1.25	0.075	0.100373	0.106717	0.114646	0.124557	0.136947	0.152433	0.171792	0.19599	0.226237
		1	1	1	1	1	1	1	1	1	1	1	1	1	1	1	1					9.69354	9.69354	9.69354		0	0	1											1.5625	0.0770833	0.103161	0.109681	0.11783	0.128017	0.140751	0.156668	0.176564	0.201434	0.232521
		1	1	1	1	1	1	1	1	1	1	1	1	1	1	1	1					9.37676	9.37676	9.37676		0	0	1											1.95312	0.0796875	0.106647	0.113386	0.121811	0.132342	0.145506	0.16196	0.182529	0.208239	0.240377
		1	1	1	1	1	1	1	1	1	1	1	1	1	1	1	1					9.00875	9.00875	9.00875		0	0	1											2.44141	0.0829427	0.111003	0.118018	0.126787	0.137748	0.15145	0.168576	0.189985	0.216745	0.250196
		1	1	1	1	1	1	1	1	1	1	1	1	1	1	1	1					8.58747	8.58747	8.58747		0	0	1											3.05176	0.0870117	0.116449	0.123808	0.133007	0.144506	0.15888	0.176846	0.199305	0.227378	0.26247
		1	1	1	1	1	1	1	1	1	1	1	1	1	1	1	1					8.11321	8.11321	8.11321		0	0	1											3.8147	0.092098	0.123256	0.131045	0.140782	0.152953	0.168167	0.187184	0.210955	0.24067	0.277813
		1	1	1	1	1	1	1	1	1	1	1	1	1	1	1	1					7.5893	7.5893	7.5893		0	0	1											4.76837	0.0984558	0.131765	0.140092	0.150501	0.163512	0.179776	0.200106	0.225518	0.257284	0.296991
		1	1	1	1	1	1	1	1	1	1	1	1	1	1	1	1					7.02245	7.02245	7.02245		0	0	1											5.96046	0.106403	0.1424	0.1514	0.162649	0.17671	0.194287	0.216258	0.243722	0.278052	0.320964
		1	1	1	1	1	1	1	1	1	1	1	1	1	1	1	1					6.4228	6.4228	6.4228		0	0	1											7.45058	0.116337	0.155695	0.165535	0.177834	0.193209	0.212427	0.236449	0.266477	0.304012	0.35093
		1	1	1	1	1	1	1	1	1	1	1	1	1	1	1	1					5.80336	5.80336	5.80336		0	0	1											9.31323	0.128755	0.172314	0.183204	0.196816	0.213831	0.235101	0.261687	0.29492	0.336461	0.388388
		1	1	1	1	1	1	1	1	1	1	1	1	1	1	1	1					5.179	5.179	5.179		0	0	1											11.6415	0.144277	0.193087	0.20529	0.220543	0.23961	0.263443	0.293235	0.330474	0.377023	0.43521
		1	1	1	1	1	1	1	1	1	1	1	1	1	1	1	1					4.56508	4.56508	4.56508		0	0	1											14.5519	0.163679	0.219054	0.232898	0.250202	0.271833	0.298871	0.332669	0.374917	0.427726	0.493738
		1	1	1	1	1	1	1	1	1	1	1	1	1	1	1	1					3.97595	3.97595	3.97595		0	0	1											18.1899	0.187933	0.251512	0.267407	0.287276	0.312112	0.343157	0.381963	0.43047	0.491104	0.566897
		1	1	1	1	1	1	1	1	1	1	1	1	1	1	1	1					3.42366	3.42366	3.42366		0	0	1											22.7374	0.218249	0.292085	0.310544	0.333618	0.36246	0.398513	0.443579	0.499912	0.570327	0.658347
																						9.58357	9.58357	9.58357		0	0	1
n	240																					9.37061	9.37061	9.37061		0	0	1												13.6364	10.1892	9.58357	8.92075	8.2109	7.46807	6.70934	5.9533	5.21827	4.5206
																						9.11735	9.11735	9.11735		0	0	1												13.3333	9.9628	9.37061	8.72251	8.02843	7.30211	6.56025	5.82101	5.10231	4.42014
																						8.81939	8.81939	8.81939		0	0	1												12.973	9.69354	9.11735	8.48677	7.81145	7.10476	6.38294	5.66368	4.96441	4.30068
																						8.47326	8.47326	8.47326		0	0	1												12.549	9.37676	8.81939	8.20942	7.55617	6.87258	6.17435	5.47859	4.80218	4.16014
																						8.07702	8.07702	8.07702		0	0	1												12.0565	9.00875	8.47326	7.88723	7.25962	6.60285	5.93203	5.26358	4.61371	3.99687
																						7.63095	7.63095	7.63095		0	0	1												11.4927	8.58747	8.07702	7.5184	6.92013	6.29408	5.65462	5.01743	4.39795	3.80996
																						7.13818	7.13818	7.13818		0	0	1												10.858	8.11321	7.63095	7.10318	6.53795	5.94648	5.34234	4.74034	4.15507	3.59955
																						6.60503	6.60503	6.60503		0	0	1												10.1568	7.5893	7.13818	6.64449	6.11576	5.56248	4.99735	4.43423	3.88675	3.3671
																						6.04102	6.04102	6.04102		0	0	1												9.39822	7.02245	6.60503	6.14821	5.65897	5.14702	4.6241	4.10303	3.59645	3.11561
																						5.4584	5.4584	5.4584		0	0	1												8.5957	6.4228	6.04102	5.62321	5.17575	4.70751	4.22924	3.75267	3.28935	2.84957
																						4.87116	4.87116	4.87116		0	0	1												7.7667	5.80336	5.4584	5.08088	4.67658	4.2535	3.82136	3.39075	2.97211	2.57474
																						4.29373	4.29373	4.29373		0	0	1												6.93112	5.179	4.87116	4.53426	4.17345	3.79589	3.41024	3.02596	2.65235	2.29774
																						3.73961	3.73961	3.73961		0	0	1												6.1095	4.56508	4.29373	3.99677	3.67873	3.34592	3.00599	2.66726	2.33794	2.02537
																						3.22015	3.22015	3.22015		0	0	1												5.32106	3.97595	3.73961	3.48097	3.20398	2.91412	2.61806	2.32304	2.03623	1.76399
																						8.92075	8.92075	8.92075		0	0	1												4.58192	3.42366	3.22015	2.99744	2.75892	2.50933	2.25439	2.00035	1.75338	1.51896
																						8.72251	8.72251	8.72251		0	0	1
																						8.48677	8.48677	8.48677		0	0	1												1/s	0	0.0439805	0.0549756	0.0687195	0.0858993	0.107374	0.134218	0.167772	0.209715
																						8.20942	8.20942	8.20942		0	0	1											1	1	0.0733333	0.0981428	0.104345	0.112098	0.121789	0.133903	0.149046	0.167974	0.191634
																						7.88723	7.88723	7.88723		0	0	1											2	1.25	0.075	0.100373	0.106717	0.114646	0.124557	0.136947	0.152433	0.171792	0.19599
																						7.5184	7.5184	7.5184		0	0	1											3	1.5625	0.0770833	0.103161	0.109681	0.11783	0.128017	0.140751	0.156668	0.176564	0.201434
																						7.10318	7.10318	7.10318		0	0	1											4	1.95312	0.0796875	0.106647	0.113386	0.121811	0.132342	0.145506	0.16196	0.182529	0.208239
																						6.64449	6.64449	6.64449		0	0	1											5	2.44141	0.0829427	0.111003	0.118018	0.126787	0.137748	0.15145	0.168576	0.189985	0.216745
																						6.14821	6.14821	6.14821		0	0	1											6	3.05176	0.0870117	0.116449	0.123808	0.133007	0.144506	0.15888	0.176846	0.199305	0.227378
																						5.62321	5.62321	5.62321		0	0	1											7	3.8147	0.092098	0.123256	0.131045	0.140782	0.152953	0.168167	0.187184	0.210955	0.24067
																						5.08088	5.08088	5.08088		0	0	1											8	4.76837	0.0984558	0.131765	0.140092	0.150501	0.163512	0.179776	0.200106	0.225518	0.257284
																						4.53426	4.53426	4.53426		0	0	1											9	5.96046	0.106403	0.1424	0.1514	0.162649	0.17671	0.194287	0.216258	0.243722	0.278052
																						3.99677	3.99677	3.99677		0	0	1											10	7.45058	0.116337	0.155695	0.165535	0.177834	0.193209	0.212427	0.236449	0.266477	0.304012
																						3.48097	3.48097	3.48097		0	0	1											11	9.31323	0.128755	0.172314	0.183204	0.196816	0.213831	0.235101	0.261687	0.29492	0.336461
																						2.99744	2.99744	2.99744		0	0	1											12	11.6415	0.144277	0.193087	0.20529	0.220543	0.23961	0.263443	0.293235	0.330474	0.377023
																						8.2109	8.2109	8.2109		0	0	1											13	14.5519	0.163679	0.219054	0.232898	0.250202	0.271833	0.298871	0.332669	0.374917	0.427726
																						8.02843	8.02843	8.02843		0	0	1											14	18.1899	0.187933	0.251512	0.267407	0.287276	0.312112	0.343157	0.381963	0.43047	0.491104
																						7.81145	7.81145	7.81145		0	0	1											15	22.7374	0.218249	0.292085	0.310544	0.333618	0.36246	0.398513	0.443579	0.499912	0.570327
																						7.55617	7.55617	7.55617		0	0	1
																						7.25962	7.25962	7.25962		0	0	1
																						6.92013	6.92013	6.92013		0	0	1
																						6.53795	6.53795	6.53795		0	0	1
																						6.11576	6.11576	6.11576		0	0	1
																						5.65897	5.65897	5.65897		0	0	1
																						5.17575	5.17575	5.17575		0	0	1
																						4.67658	4.67658	4.67658		0	0	1
																						4.17345	4.17345	4.17345		0	0	1
																						3.67873	3.67873	3.67873		0	0	1
																						3.20398	3.20398	3.20398		0	0	1
																						2.75892	2.75892	2.75892		0	0	1
																						7.46807	7.46807	7.46807		0	0	1
																						7.30211	7.30211	7.30211		0	0	1
																						7.10476	7.10476	7.10476		0	0	1
																						6.87258	6.87258	6.87258		0	0	1
																						6.60285	6.60285	6.60285		0	0	1
																						6.29408	6.29408	6.29408		0	0	1
																						5.94648	5.94648	5.94648		0	0	1
																						5.56248	5.56248	5.56248		0	0	1
																						5.14702	5.14702	5.14702		0	0	1
																						4.70751	4.70751	4.70751		0	0	1
																						4.2535	4.2535	4.2535		0	0	1
																						3.79589	3.79589	3.79589		0	0	1
																						3.34592	3.34592	3.34592		0	0	1
																						2.91412	2.91412	2.91412		0	0	1
																						2.50933	2.50933	2.50933		0	0	1
																						6.70934	6.70934	6.70934		0	0	1
																						6.56025	6.56025	6.56025		0	0	1
																						6.38294	6.38294	6.38294		0	0	1
																						6.17435	6.17435	6.17435		0	0	1
																						5.93203	5.93203	5.93203		0	0	1
																						5.65462	5.65462	5.65462		0	0	1
																						5.34234	5.34234	5.34234		0	0	1
																						4.99735	4.99735	4.99735		0	0	1
																						4.6241	4.6241	4.6241		0	0	1
																						4.22924	4.22924	4.22924		0	0	1
																						3.82136	3.82136	3.82136		0	0	1
																						3.41024	3.41024	3.41024		0	0	1
																						3.00599	3.00599	3.00599		0	0	1
																						2.61806	2.61806	2.61806		0	0	1
																						2.25439	2.25439	2.25439		0	0	1
																						5.9533	5.9533	5.9533		0	0	1
																						5.82101	5.82101	5.82101		0	0	1
																						5.66368	5.66368	5.66368		0	0	1
																						5.47859	5.47859	5.47859		0	0	1
																						5.26358	5.26358	5.26358		0	0	1
																						5.01743	5.01743	5.01743		0	0	1
																						4.74034	4.74034	4.74034		0	0	1
																						4.43423	4.43423	4.43423		0	0	1
																						4.10303	4.10303	4.10303		0	0	1
																						3.75267	3.75267	3.75267		0	0	1
																						3.39075	3.39075	3.39075		0	0	1
																						3.02596	3.02596	3.02596		0	0	1
																						2.66726	2.66726	2.66726		0	0	1
																						2.32304	2.32304	2.32304		0	0	1
																						2.00035	2.00035	2.00035		0	0	1
																						5.21827	5.21827	5.21827		0	0	1
																						5.10231	5.10231	5.10231		0	0	1
																						4.96441	4.96441	4.96441		0	0	1
																						4.80218	4.80218	4.80218		0	0	1
																						4.61371	4.61371	4.61371		0	0	1
																						4.39795	4.39795	4.39795		0	0	1
																						4.15507	4.15507	4.15507		0	0	1
																						3.88675	3.88675	3.88675		0	0	1
																						3.59645	3.59645	3.59645		0	0	1
																						3.28935	3.28935	3.28935		0	0	1
																						2.97211	2.97211	2.97211		0	0	1
																						2.65235	2.65235	2.65235		0	0	1
																						2.33794	2.33794	2.33794		0	0	1
																						2.03623	2.03623	2.03623		0	0	1
																						1.75338	1.75338	1.75338		0	0	1
																						4.5206	4.5206	4.5206		0	0	1
																						4.42014	4.42014	4.42014		0	0	1
																						4.30068	4.30068	4.30068		0	0	1
																						4.16014	4.16014	4.16014		0	0	1
																						3.99687	3.99687	3.99687		0	0	1
																						3.80996	3.80996	3.80996		0	0	1
																						3.59955	3.59955	3.59955		0	0	1
																						3.3671	3.3671	3.3671		0	0	1
																						3.11561	3.11561	3.11561		0	0	1
																						2.84957	2.84957	2.84957		0	0	1
																						2.57474	2.57474	2.57474		0	0	1
																						2.29774	2.29774	2.29774		0	0	1
																						2.02537	2.02537	2.02537		0	0	1
																						1.76399	1.76399	1.76399		0	0	1
																						1.51896	1.51896	1.51896		0	0	1
																						3.87329	3.87329	3.87329		0	0	1
																						3.78722	3.78722	3.78722		0	0	1
																						3.68486	3.68486	3.68486		0	0	1
																						3.56444	3.56444	3.56444		0	0	1
																						3.42455	3.42455	3.42455		0	0	1
																						3.2644	3.2644	3.2644		0	0	1
																						3.08412	3.08412	3.08412		0	0	1
																						2.88496	2.88496	2.88496		0	0	1
																						2.66948	2.66948	2.66948		0	0	1
																						2.44153	2.44153	2.44153		0	0	1
																						2.20606	2.20606	2.20606		0	0	1
																						1.96872	1.96872	1.96872		0	0	1
																						1.73535	1.73535	1.73535		0	0	1
																						1.5114	1.5114	1.5114		0	0	1
																						1.30145	1.30145	1.30145		0	0	1
																						3.28526	3.28526	3.28526		0	0	1
																						3.21226	3.21226	3.21226		0	0	1
																						3.12544	3.12544	3.12544		0	0	1
																						3.0233	3.0233	3.0233		0	0	1
																						2.90465	2.90465	2.90465		0	0	1
																						2.76881	2.76881	2.76881		0	0	1
																						2.6159	2.6159	2.6159		0	0	1
																						2.44698	2.44698	2.44698		0	0	1
																						2.26421	2.26421	2.26421		0	0	1
																						2.07087	2.07087	2.07087		0	0	1
																						1.87115	1.87115	1.87115		0	0	1
																						1.66984	1.66984	1.66984		0	0	1
																						1.4719	1.4719	1.4719		0	0	1
																						1.28194	1.28194	1.28194		0	0	1
																						1.10387	1.10387	1.10387		0	0	1
																						2.76126	2.76126	2.76126		0	0	1
																						2.6999	2.6999	2.6999		0	0	1
																						2.62693	2.62693	2.62693		0	0	1
																						2.54108	2.54108	2.54108		0	0	1
																						2.44135	2.44135	2.44135		0	0	1
																						2.32718	2.32718	2.32718		0	0	1
																						2.19866	2.19866	2.19866		0	0	1
																						2.05668	2.05668	2.05668		0	0	1
																						1.90307	1.90307	1.90307		0	0	1
																						1.74056	1.74056	1.74056		0	0	1
																						1.5727	1.5727	1.5727		0	0	1
																						1.4035	1.4035	1.4035		0	0	1
																						1.23713	1.23713	1.23713		0	0	1
																						1.07747	1.07747	1.07747		0	0	1
																						0.927803	0.927803	0.927803		0	0	1
																						2.30224	2.30224	2.30224		0	0	1
																						2.25108	2.25108	2.25108		0	0	1
																						2.19024	2.19024	2.19024		0	0	1
																						2.11867	2.11867	2.11867		0	0	1
																						2.03552	2.03552	2.03552		0	0	1
																						1.94033	1.94033	1.94033		0	0	1
																						1.83317	1.83317	1.83317		0	0	1
																						1.71479	1.71479	1.71479		0	0	1
																						1.58671	1.58671	1.58671		0	0	1
																						1.45122	1.45122	1.45122		0	0	1
																						1.31126	1.31126	1.31126		0	0	1
																						1.17019	1.17019	1.17019		0	0	1
																						1.03147	1.03147	1.03147		0	0	1
																						0.89836	0.89836	0.89836		0	0	1
																						0.773571	0.773571	0.773571		0	0	1
																						1.90616	1.90616	1.90616		0	0	1
																						1.8638	1.8638	1.8638		0	0	1
																						1.81343	1.81343	1.81343		0	0	1
																						1.75416	1.75416	1.75416		0	0	1
																						1.68532	1.68532	1.68532		0	0	1
																						1.60651	1.60651	1.60651		0	0	1
																						1.51779	1.51779	1.51779		0	0	1
																						1.41977	1.41977	1.41977		0	0	1
																						1.31373	1.31373	1.31373		0	0	1
																						1.20155	1.20155	1.20155		0	0	1
																						1.08567	1.08567	1.08567		0	0	1
																						0.968866	0.968866	0.968866		0	0	1
																						0.854017	0.854017	0.854017		0	0	1
																						0.743804	0.743804	0.743804		0	0	1
																						0.640483	0.640483	0.640483		0	0	1
																						1.56879	1.56879	1.56879		0	0	1
																						1.53392	1.53392	1.53392		0	0	1
																						1.49247	1.49247	1.49247		0	0	1
																						1.44369	1.44369	1.44369		0	0	1
																						1.38703	1.38703	1.38703		0	0	1
																						1.32217	1.32217	1.32217		0	0	1
																						1.24915	1.24915	1.24915		0	0	1
																						1.16849	1.16849	1.16849		0	0	1
																						1.08121	1.08121	1.08121		0	0	1
																						0.988886	0.988886	0.988886		0	0	1
																						0.893514	0.893514	0.893514		0	0	1
																						0.797385	0.797385	0.797385		0	0	1
																						0.702863	0.702863	0.702863		0	0	1
																						0.612157	0.612157	0.612157		0	0	1
																						0.527124	0.527124	0.527124		0	0	1
[truncated: 54 more columns]

## Sheet: Partial Competitive
																V_max*(([S]/K_s )+([S]/(aK_s*K_i )))/((1+([S]/K_s )+([I]/K_i )+(([S]*[I])/(aK_s*K_i ))) )							Calculated values
		No Inhibitor	[I]1	[I]2	[I]3	[I]4	[I]5	[I]6	[I]7	[I]8	[I]9	[I]10	[I]11	[I]12	[I]13	[I]14	[I]15						No Inhibitor	[I]1	[I]2	[I]3	[I]4	[I]5	[I]6	[I]7	[I]8	[I]9	[I]10	[I]11	[I]12	[I]13	[I]14	[I]15
		0	0.0439805	0.0549756	0.0687195	0.0858993	0.107374	0.134218	0.167772	0.209715	0.262144	0.32768	0.4096	0.512	0.64	0.8	1	Km	aKm	Vmax	Ki		0	0.0439805	0.0549756	0.0687195	0.0858993	0.107374	0.134218	0.167772	0.209715	0.262144	0.32768	0.4096	0.512	0.64	0.8	1
[S]1	1	13.6364	10.1892	9.58357	8.92075	8.2109	7.46807	6.70934	5.9533	5.21827	4.5206	3.87329	3.28526	2.76126	2.30224	1.90616	1.56879	0.100001	0.099921	1.72543	0.130088		13.6361	10.1889	9.58322	8.9204	8.21055	7.46773	6.70902	5.95299	5.21799	4.52034	3.87306	3.28506	2.76108	2.30209	1.90603	1.56868		13.6361	10.1889	9.58322	8.9204	8.21055	7.46773	6.70902	5.95299	5.21799	4.52034
[S]2	0.8	13.3333	9.9628	9.37061	8.72251	8.02843	7.30211	6.56025	5.82101	5.10231	4.42014	3.78722	3.21226	2.6999	2.25108	1.8638	1.53392						13.3331	9.9625	9.3703	8.72221	8.02814	7.30183	6.55998	5.82076	5.10208	4.41994	3.78703	3.21209	2.69976	2.25096	1.8637	1.53384		13.3331	9.9625	9.3703	8.72221	8.02814	7.30183	6.55998	5.82076	5.10208	4.41994
[S]3	0.64	12.973	9.69354	9.11735	8.48677	7.81145	7.10476	6.38294	5.66368	4.96441	4.30068	3.68486	3.12544	2.62693	2.19024	1.81343	1.49247						12.9727	9.69328	9.1171	8.48653	7.81122	7.10454	6.38274	5.6635	4.96425	4.30053	3.68473	3.12533	2.62683	2.19016	1.81336	1.49241		12.9727	9.69328	9.1171	8.48653	7.81122	7.10454	6.38274	5.6635	4.96425	4.30053
[S]4	0.512	12.549	9.37676	8.81939	8.20942	7.55617	6.87258	6.17435	5.47859	4.80218	4.16014	3.56444	3.0233	2.54108	2.11867	1.75416	1.44369						12.5487	9.37656	8.81921	8.20925	7.55602	6.87244	6.17422	5.47848	4.80208	4.16005	3.56437	3.02324	2.54103	2.11863	1.75413	1.44367		12.5487	9.37656	8.81921	8.20925	7.55602	6.87244	6.17422	5.47848	4.80208	4.16005
[S]5	0.4096	12.0565	9.00875	8.47326	7.88723	7.25962	6.60285	5.93203	5.26358	4.61371	3.99687	3.42455	2.90465	2.44135	2.03552	1.68532	1.38703						12.0562	9.00862	8.47315	7.88714	7.25954	6.6028	5.93199	5.26355	4.61369	3.99686	3.42454	2.90465	2.44135	2.03552	1.68532	1.38704		12.0562	9.00862	8.47315	7.88714	7.25954	6.6028	5.93199	5.26355	4.61369	3.99686
[S]6	0.32768	11.4927	8.58747	8.07702	7.5184	6.92013	6.29408	5.65462	5.01743	4.39795	3.80996	3.2644	2.76881	2.32718	1.94033	1.60651	1.32217			Sum R2	1.53723e-05		11.4924	8.5874	8.07698	7.51838	6.92014	6.29411	5.65467	5.01749	4.39802	3.81002	3.26447	2.76888	2.32724	1.94038	1.60655	1.32221		11.4924	8.5874	8.07698	7.51838	6.92014	6.29411	5.65467	5.01749	4.39802	3.81002
[S]7	0.262144	10.858	8.11321	7.63095	7.10318	6.53795	5.94648	5.34234	4.74034	4.15507	3.59955	3.08412	2.6159	2.19866	1.83317	1.51779	1.24915			Sum residuals %	0.0204189		10.8577	8.11321	7.63099	7.10324	6.53805	5.94659	5.34247	4.74048	4.15521	3.59969	3.08426	2.61603	2.19877	1.83327	1.51787	1.24923		10.8577	8.11321	7.63099	7.10324	6.53805	5.94659	5.34247	4.74048	4.15521	3.59969
[S]8	0.209715	10.1568	7.5893	7.13818	6.64449	6.11576	5.56248	4.99735	4.43423	3.88675	3.3671	2.88496	2.44698	2.05668	1.71479	1.41977	1.16849						10.1566	7.58937	7.13829	6.64463	6.11594	5.56268	4.99757	4.43445	3.88698	3.36732	2.88516	2.44716	2.05685	1.71494	1.4199	1.16859		10.1566	7.58937	7.13829	6.64463	6.11594	5.56268	4.99757	4.43445	3.88698	3.36732
[S]9	0.167772	9.39822	7.02245	6.60503	6.14821	5.65897	5.14702	4.6241	4.10303	3.59645	3.11561	2.66948	2.26421	1.90307	1.58671	1.31373	1.08121						9.39799	7.02258	6.6052	6.14842	5.65922	5.14729	4.62439	4.10333	3.59674	3.11589	2.66975	2.26445	1.90328	1.5869	1.31389	1.08135		9.39799	7.02258	6.6052	6.14842	5.65922	5.14729	4.62439	4.10333	3.59674	3.11589
[S]10	0.134218	8.5957	6.4228	6.04102	5.62321	5.17575	4.70751	4.22924	3.75267	3.28935	2.84957	2.44153	2.07087	1.74056	1.45122	1.20155	0.988886						8.59548	6.42298	6.04125	5.62349	5.17606	4.70785	4.2296	3.75303	3.2897	2.84991	2.44185	2.07116	1.74082	1.45145	1.20174	0.989049		8.59548	6.42298	6.04125	5.62349	5.17606	4.70785	4.2296	3.75303	3.2897	2.84991
[S]11	0.107374	7.7667	5.80336	5.4584	5.08088	4.67658	4.2535	3.82136	3.39075	2.97211	2.57474	2.20606	1.87115	1.5727	1.31126	1.08567	0.893514						7.7665	5.80359	5.45868	5.08121	4.67694	4.25389	3.82176	3.39116	2.97251	2.57512	2.20642	1.87147	1.57298	1.31151	1.08588	0.893696		7.7665	5.80359	5.45868	5.08121	4.67694	4.25389	3.82176	3.39116	2.97251	2.57512
[S]12	0.0858993	6.93112	5.179	4.87116	4.53426	4.17345	3.79589	3.41024	3.02596	2.65235	2.29774	1.96872	1.66984	1.4035	1.17019	0.968866	0.797385						6.93093	5.17926	4.87147	4.53461	4.17384	3.79631	3.41067	3.02639	2.65278	2.29815	1.9691	1.67018	1.4038	1.17045	0.969094	0.797579		6.93093	5.17926	4.87147	4.53461	4.17384	3.79631	3.41067	3.02639	2.65278	2.29815
[S]13	0.0687195	6.1095	4.56508	4.29373	3.99677	3.67873	3.34592	3.00599	2.66726	2.33794	2.02537	1.73535	1.4719	1.23713	1.03147	0.854017	0.702863						6.10933	4.56536	4.29406	3.99714	3.67914	3.34636	3.00644	2.66771	2.33838	2.02578	1.73574	1.47225	1.23744	1.03174	0.854249	0.703061		6.10933	4.56536	4.29406	3.99714	3.67914	3.34636	3.00644	2.66771	2.33838	2.02578
[S]14	0.0549756	5.32106	3.97595	3.73961	3.48097	3.20398	2.91412	2.61806	2.32304	2.03623	1.76399	1.5114	1.28194	1.07747	0.89836	0.743804	0.612157						5.32091	3.97623	3.73994	3.48135	3.20439	2.91455	2.6185	2.32349	2.03666	1.7644	1.51178	1.28229	1.07778	0.898626	0.744032	0.612351		5.32091	3.97623	3.73994	3.48135	3.20439	2.91455	2.6185	2.32349	2.03666	1.7644
[S]15	0.0439805	4.58192	3.42366	3.22015	2.99744	2.75892	2.50933	2.25439	2.00035	1.75338	1.51896	1.30145	1.10387	0.927803	0.773571	0.640483	0.527124						4.58179	3.42393	3.22047	2.9978	2.75932	2.50974	2.25482	2.00078	1.75379	1.51935	1.30182	1.1042	0.928095	0.773825	0.640702	0.527309		4.58179	3.42393	3.22047	2.9978	2.75932	2.50974	2.25482	2.00078	1.75379	1.51935
	1	1	1	1	1	1	1	1	1	1	1	1	1	1	1	1	1																					1	1	13.6361	10.1889	9.58322	8.9204	8.21055	7.46773	6.70902	5.95299	5.21799	4.52034
	1	1	1	1	1	1	1	1	1	1	1	1	1	1	1	1	1					13.6364	13.6364	13.6361		-0.000285096	-0.000285096	2										0.8	0.8	13.3331	9.9625	9.3703	8.72221	8.02814	7.30183	6.55998	5.82076	5.10208	4.41994
	1	1	1	1	1	1	1	1	1	1	1	1	1	1	1	1	1					13.3333	13.3333	13.3331		-0.000282327	-0.000282327	2										0.64	0.64	12.9727	9.69328	9.1171	8.48653	7.81122	7.10454	6.38274	5.6635	4.96425	4.30053
	1	1	1	1	1	1	1	1	1	1	1	1	1	1	1	1	1					12.973	12.973	12.9727		-0.000278824	-0.000278824	2										0.512	0.512	12.5487	9.37656	8.81921	8.20925	7.55602	6.87244	6.17422	5.47848	4.80208	4.16005
	1	1	1	1	1	1	1	1	1	1	1	1	1	1	1	1	1					12.549	12.549	12.5487		-0.000274408	-0.000274408	2										0.4096	0.4096	12.0562	9.00862	8.47315	7.88714	7.25954	6.6028	5.93199	5.26355	4.61369	3.99686
	1	1	1	1	1	1	1	1	1	1	1	1	1	1	1	1	1					12.0565	12.0565	12.0562		-0.000268881	-0.000268881	2										0.32768	0.32768	11.4924	8.5874	8.07698	7.51838	6.92014	6.29411	5.65467	5.01749	4.39802	3.81002
	1	1	1	1	1	1	1	1	1	1	1	1	1	1	1	1	1					11.4927	11.4927	11.4924		-0.000262027	-0.000262027	2										0.262144	0.262144	10.8577	8.11321	7.63099	7.10324	6.53805	5.94659	5.34247	4.74048	4.15521	3.59969
	1	1	1	1	1	1	1	1	1	1	1	1	1	1	1	1	1					10.858	10.858	10.8577		-0.00025364	-0.00025364	2										0.209715	0.209715	10.1566	7.58937	7.13829	6.64463	6.11594	5.56268	4.99757	4.43445	3.88698	3.36732
	1	1	1	1	1	1	1	1	1	1	1	1	1	1	1	1	1					10.1568	10.1568	10.1566		-0.000243548	-0.000243548	2										0.167772	0.167772	9.39799	7.02258	6.6052	6.14842	5.65922	5.14729	4.62439	4.10333	3.59674	3.11589
	1	1	1	1	1	1	1	1	1	1	1	1	1	1	1	1	1					9.39822	9.39822	9.39799		-0.000231651	-0.000231651	2										0.134218	0.134218	8.59548	6.42298	6.04125	5.62349	5.17606	4.70785	4.2296	3.75303	3.2897	2.84991
	1	1	1	1	1	1	1	1	1	1	1	1	1	1	1	1	1					8.5957	8.5957	8.59548		-0.00021796	-0.00021796	2										0.107374	0.107374	7.7665	5.80359	5.45868	5.08121	4.67694	4.25389	3.82176	3.39116	2.97251	2.57512
	1	1	1	1	1	1	1	1	1	1	1	1	1	1	1	1	1					7.7667	7.7667	7.7665		-0.000202623	-0.000202623	2										0.0858993	0.0858993	6.93093	5.17926	4.87147	4.53461	4.17384	3.79631	3.41067	3.02639	2.65278	2.29815
	1	1	1	1	1	1	1	1	1	1	1	1	1	1	1	1	1					6.93112	6.93112	6.93093		-0.000185936	-0.000185936	2										0.0687195	0.0687195	6.10933	4.56536	4.29406	3.99714	3.67914	3.34636	3.00644	2.66771	2.33838	2.02578
	1	1	1	1	1	1	1	1	1	1	1	1	1	1	1	1	1					6.1095	6.1095	6.10933		-0.000168326	-0.000168326	2										0.0549756	0.0549756	5.32091	3.97623	3.73994	3.48135	3.20439	2.91455	2.6185	2.32349	2.03666	1.7644
	1	1	1	1	1	1	1	1	1	1	1	1	1	1	1	1	1					5.32106	5.32106	5.32091		-0.000150307	-0.000150307	2										0.0439805	0.0439805	4.58179	3.42393	3.22047	2.9978	2.75932	2.50974	2.25482	2.00078	1.75379	1.51935
																						4.58192	4.58192	4.58179		-0.000132418	-0.000132418	2
																						10.1892	10.1892	10.1889		-0.000354315	-0.000354315	2											1	0.0733349	0.0981462	0.104349	0.112103	0.121795	0.13391	0.149053	0.167983	0.191645	0.221222
																						9.9628	9.9628	9.9625		-0.000308225	-0.000308225	2											1.25	0.0750016	0.100376	0.10672	0.11465	0.124562	0.136952	0.15244	0.171799	0.195998	0.226248
																						9.69354	9.69354	9.69328		-0.000255676	-0.000255676	2											1.5625	0.077085	0.103164	0.109684	0.117834	0.128021	0.140755	0.156672	0.176569	0.20144	0.232529
																						9.37676	9.37676	9.37656		-0.000196999	-0.000196999	2											1.95312	0.0796892	0.106649	0.113389	0.121814	0.132345	0.145509	0.161964	0.182532	0.208243	0.240381
																						9.00875	9.00875	9.00862		-0.000133102	-0.000133102	2											2.44141	0.0829446	0.111005	0.11802	0.126789	0.13775	0.151451	0.168578	0.189986	0.216746	0.250197
																						8.58747	8.58747	8.5874		-6.55866e-05	-6.55866e-05	2											3.05176	0.0870137	0.11645	0.123809	0.133007	0.144506	0.158879	0.176845	0.199303	0.227375	0.262466
																						8.11321	8.11321	8.11321		3.22377e-06	3.22377e-06	2											3.8147	0.0921001	0.123256	0.131045	0.140781	0.152951	0.168164	0.187179	0.210949	0.240662	0.277802
																						7.5893	7.5893	7.58937		7.03802e-05	7.03802e-05	2											4.76837	0.0984582	0.131763	0.14009	0.150497	0.163507	0.17977	0.200097	0.225507	0.257269	0.296972
																						7.02245	7.02245	7.02258		0.000132566	0.000132566	2											5.96046	0.106406	0.142398	0.151396	0.162643	0.176703	0.194277	0.216245	0.243705	0.278029	0.320935
																						6.4228	6.4228	6.42298		0.0001865	0.0001865	2											7.45058	0.11634	0.155691	0.165529	0.177826	0.193197	0.212411	0.236429	0.266451	0.303979	0.350889
																						5.80336	5.80336	5.80359		0.000229421	0.000229421	2											9.31323	0.128758	0.172307	0.183194	0.196804	0.213815	0.235079	0.261659	0.294885	0.336416	0.388331
																						5.179	5.179	5.17926		0.000259527	0.000259527	2											11.6415	0.144281	0.193078	0.205277	0.220526	0.239587	0.263414	0.293197	0.330426	0.376963	0.435133
																						4.56508	4.56508	4.56536		0.000276249	0.000276249	2											14.5519	0.163684	0.219041	0.23288	0.250179	0.271803	0.298832	0.33262	0.374854	0.427646	0.493636
																						3.97595	3.97595	3.97623		0.000280288	0.000280288	2											18.1899	0.187938	0.251495	0.267384	0.287245	0.312072	0.343106	0.381898	0.430387	0.491	0.566765
																						3.42366	3.42366	3.42393		0.000273394	0.000273394	2											22.7374	0.218255	0.292062	0.310514	0.333578	0.362409	0.398447	0.443495	0.499805	0.570192	0.658176
																						9.58357	9.58357	9.58322		-0.000356602	-0.000356602	2
																						9.37061	9.37061	9.3703		-0.000305978	-0.000305978	2												13.6364	10.1892	9.58357	8.92075	8.2109	7.46807	6.70934	5.9533	5.21827	4.5206
																						9.11735	9.11735	9.1171		-0.000248301	-0.000248301	2												13.3333	9.9628	9.37061	8.72251	8.02843	7.30211	6.56025	5.82101	5.10231	4.42014
																						8.81939	8.81939	8.81921		-0.00018396	-0.00018396	2												12.973	9.69354	9.11735	8.48677	7.81145	7.10476	6.38294	5.66368	4.96441	4.30068
																						8.47326	8.47326	8.47315		-0.000113984	-0.000113984	2												12.549	9.37676	8.81939	8.20942	7.55617	6.87258	6.17435	5.47859	4.80218	4.16014
																						8.07702	8.07702	8.07698		-4.0171e-05	-4.0171e-05	2												12.0565	9.00875	8.47326	7.88723	7.25962	6.60285	5.93203	5.26358	4.61371	3.99687
																						7.63095	7.63095	7.63099		3.48853e-05	3.48853e-05	2												11.4927	8.58747	8.07702	7.5184	6.92013	6.29408	5.65462	5.01743	4.39795	3.80996
																						7.13818	7.13818	7.13829		0.000107902	0.000107902	2												10.858	8.11321	7.63095	7.10318	6.53795	5.94648	5.34234	4.74034	4.15507	3.59955
																						6.60503	6.60503	6.6052		0.0001752	0.0001752	2												10.1568	7.5893	7.13818	6.64449	6.11576	5.56248	4.99735	4.43423	3.88675	3.3671
																						6.04102	6.04102	6.04125		0.000233152	0.000233152	2												9.39822	7.02245	6.60503	6.14821	5.65897	5.14702	4.6241	4.10303	3.59645	3.11561
																						5.4584	5.4584	5.45868		0.000278722	0.000278722	2												8.5957	6.4228	6.04102	5.62321	5.17575	4.70751	4.22924	3.75267	3.28935	2.84957
																						4.87116	4.87116	4.87147		0.000309954	0.000309954	2												7.7667	5.80336	5.4584	5.08088	4.67658	4.2535	3.82136	3.39075	2.97211	2.57474
																						4.29373	4.29373	4.29406		0.000326272	0.000326272	2												6.93112	5.179	4.87116	4.53426	4.17345	3.79589	3.41024	3.02596	2.65235	2.29774
																						3.73961	3.73961	3.73994		0.000328514	0.000328514	2												6.1095	4.56508	4.29373	3.99677	3.67873	3.34592	3.00599	2.66726	2.33794	2.02537
																						3.22015	3.22015	3.22047		0.000318682	0.000318682	2												5.32106	3.97595	3.73961	3.48097	3.20398	2.91412	2.61806	2.32304	2.03623	1.76399
																						8.92075	8.92075	8.9204		-0.000355724	-0.000355724	2												4.58192	3.42366	3.22015	2.99744	2.75892	2.50933	2.25439	2.00035	1.75338	1.51896
																						8.72251	8.72251	8.72221		-0.00030119	-0.00030119	2
																						8.48677	8.48677	8.48653		-0.000239097	-0.000239097	2												1/s	0	0.0439805	0.0549756	0.0687195	0.0858993	0.107374	0.134218	0.167772	0.209715
																						8.20942	8.20942	8.20925		-0.000169883	-0.000169883	2											1	1	0.0733349	0.0981462	0.104349	0.112103	0.121795	0.13391	0.149053	0.167983	0.191645
																						7.88723	7.88723	7.88714		-9.46857e-05	-9.46857e-05	2											2	1.25	0.0750016	0.100376	0.10672	0.11465	0.124562	0.136952	0.15244	0.171799	0.195998
																						7.5184	7.5184	7.51838		-1.54733e-05	-1.54733e-05	2											3	1.5625	0.077085	0.103164	0.109684	0.117834	0.128021	0.140755	0.156672	0.176569	0.20144
																						7.10318	7.10318	7.10324		6.49215e-05	6.49215e-05	2											4	1.95312	0.0796892	0.106649	0.113389	0.121814	0.132345	0.145509	0.161964	0.182532	0.208243
																						6.64449	6.64449	6.64463		0.000142925	0.000142925	2											5	2.44141	0.0829446	0.111005	0.11802	0.126789	0.13775	0.151451	0.168578	0.189986	0.216746
																						6.14821	6.14821	6.14842		0.000214542	0.000214542	2											6	3.05176	0.0870137	0.11645	0.123809	0.133007	0.144506	0.158879	0.176845	0.199303	0.227375
																						5.62321	5.62321	5.62349		0.000275845	0.000275845	2											7	3.8147	0.0921001	0.123256	0.131045	0.140781	0.152951	0.168164	0.187179	0.210949	0.240662
																						5.08088	5.08088	5.08121		0.000323561	0.000323561	2											8	4.76837	0.0984582	0.131763	0.14009	0.150497	0.163507	0.17977	0.200097	0.225507	0.257269
																						4.53426	4.53426	4.53461		0.000355603	0.000355603	2											9	5.96046	0.106406	0.142398	0.151396	0.162643	0.176703	0.194277	0.216245	0.243705	0.278029
																						3.99677	3.99677	3.99714		0.000371394	0.000371394	2											10	7.45058	0.11634	0.155691	0.165529	0.177826	0.193197	0.212411	0.236429	0.266451	0.303979
																						3.48097	3.48097	3.48135		0.000371896	0.000371896	2											11	9.31323	0.128758	0.172307	0.183194	0.196804	0.213815	0.235079	0.261659	0.294885	0.336416
																						2.99744	2.99744	2.9978		0.000359332	0.000359332	2											12	11.6415	0.144281	0.193078	0.205277	0.220526	0.239587	0.263414	0.293197	0.330426	0.376963
																						8.2109	8.2109	8.21055		-0.000350863	-0.000350863	2											13	14.5519	0.163684	0.219041	0.23288	0.250179	0.271803	0.298832	0.33262	0.374854	0.427646
																						8.02843	8.02843	8.02814		-0.000293364	-0.000293364	2											14	18.1899	0.187938	0.251495	0.267384	0.287245	0.312072	0.343106	0.381898	0.430387	0.491
																						7.81145	7.81145	7.81122		-0.000227926	-0.000227926	2											15	22.7374	0.218255	0.292062	0.310514	0.333578	0.362409	0.398447	0.443495	0.499805	0.570192
																						7.55617	7.55617	7.55602		-0.00015503	-0.00015503	2
																						7.25962	7.25962	7.25954		-7.58986e-05	-7.58986e-05	2
																						6.92013	6.92013	6.92014		7.36498e-06	7.36498e-06	2
																						6.53795	6.53795	6.53805		9.1742e-05	9.1742e-05	2
																						6.11576	6.11576	6.11594		0.000173433	0.000173433	2
																						5.65897	5.65897	5.65922		0.000248197	0.000248197	2
																						5.17575	5.17575	5.17606		0.000311876	0.000311876	2
																						4.67658	4.67658	4.67694		0.000361018	0.000361018	2
																						4.17345	4.17345	4.17384		0.000393438	0.000393438	2
																						3.67873	3.67873	3.67914		0.000408566	0.000408566	2
																						3.20398	3.20398	3.20439		0.000407464	0.000407464	2
																						2.75892	2.75892	2.75932		0.000392539	0.000392539	2
																						7.46807	7.46807	7.46773		-0.000341435	-0.000341435	2
																						7.30211	7.30211	7.30183		-0.000282186	-0.000282186	2
																						7.10476	7.10476	7.10454		-0.000214782	-0.000214782	2
																						6.87258	6.87258	6.87244		-0.000139735	-0.000139735	2
																						6.60285	6.60285	6.6028		-5.83223e-05	-5.83223e-05	2
																						6.29408	6.29408	6.29411		2.72638e-05	2.72638e-05	2
																						5.94648	5.94648	5.94659		0.000113887	0.000113887	2
																						5.56248	5.56248	5.56268		0.000197604	0.000197604	2
																						5.14702	5.14702	5.14729		0.000274024	0.000274024	2
																						4.70751	4.70751	4.70785		0.000338847	0.000338847	2
																						4.2535	4.2535	4.25389		0.000388514	0.000388514	2
																						3.79589	3.79589	3.79631		0.00042079	0.00042079	2
																						3.34592	3.34592	3.34636		0.000435113	0.000435113	2
																						2.91412	2.91412	2.91455		0.000432624	0.000432624	2
																						2.50933	2.50933	2.50974		0.00041585	0.00041585	2
																						6.70934	6.70934	6.70902		-0.000327223	-0.000327223	2
																						6.56025	6.56025	6.55998		-0.000267613	-0.000267613	2
																						6.38294	6.38294	6.38274		-0.000199822	-0.000199822	2
																						6.17435	6.17435	6.17422		-0.000124373	-0.000124373	2
																						5.93203	5.93203	5.93199		-4.2569e-05	-4.2569e-05	2
																						5.65462	5.65462	5.65467		4.33654e-05	4.33654e-05	2
																						5.34234	5.34234	5.34247		0.000130253	0.000130253	2
																						4.99735	4.99735	4.99757		0.000214107	0.000214107	2
																						4.6241	4.6241	4.62439		0.000290489	0.000290489	2
																						4.22924	4.22924	4.2296		0.000355063	0.000355063	2
																						3.82136	3.82136	3.82176		0.000404246	0.000404246	2
																						3.41024	3.41024	3.41067		0.000435801	0.000435801	2
																						3.00599	3.00599	3.00644		0.000449188	0.000449188	2
																						2.61806	2.61806	2.6185		0.000445587	0.000445587	2
																						2.25439	2.25439	2.25482		0.000427581	0.000427581	2
																						5.9533	5.9533	5.95299		-0.000308455	-0.000308455	2
																						5.82101	5.82101	5.82076		-0.000249921	-0.000249921	2
																						5.66368	5.66368	5.6635		-0.000183371	-0.000183371	2
																						5.47859	5.47859	5.47848		-0.000109327	-0.000109327	2
																						5.26358	5.26358	5.26355		-2.90826e-05	-2.90826e-05	2
																						5.01743	5.01743	5.01749		5.51645e-05	5.51645e-05	2
																						4.74034	4.74034	4.74048		0.000140277	0.000140277	2
																						4.43423	4.43423	4.43445		0.000222323	0.000222323	2
																						4.10303	4.10303	4.10333		0.00029693	0.00029693	2
																						3.75267	3.75267	3.75303		0.00035983	0.00035983	2
																						3.39075	3.39075	3.39116		0.000407505	0.000407505	2
																						3.02596	3.02596	3.02639		0.000437767	0.000437767	2
																						2.66726	2.66726	2.66771		0.000450104	0.000450104	2
																						2.32304	2.32304	2.32349		0.000445702	0.000445702	2
																						2.00035	2.00035	2.00078		0.00042713	0.00042713	2
																						5.21827	5.21827	5.21799		-0.0002858	-0.0002858	2
																						5.10231	5.10231	5.10208		-0.000229686	-0.000229686	2
																						4.96441	4.96441	4.96425		-0.0001659	-0.0001659	2
																						4.80218	4.80218	4.80208		-9.49509e-05	-9.49509e-05	2
																						4.61371	4.61371	4.61369		-1.80868e-05	-1.80868e-05	2
																						4.39795	4.39795	4.39802		6.25728e-05	6.25728e-05	2
																						4.15507	4.15507	4.15521		0.000144008	0.000144008	2
																						3.88675	3.88675	3.88698		0.000222436	0.000222436	2
																						3.59645	3.59645	3.59674		0.000293653	0.000293653	2
																						3.28935	3.28935	3.2897		0.000353562	0.000353562	2
																						2.97211	2.97211	2.97251		0.000398789	0.000398789	2
																						2.65235	2.65235	2.65278		0.000427243	0.000427243	2
																						2.33794	2.33794	2.33838		0.000438448	0.000438448	2
																						2.03623	2.03623	2.03666		0.000433562	0.000433562	2
																						1.75338	1.75338	1.75379		0.00041507	0.00041507	2
																						4.5206	4.5206	4.52034		-0.000260275	-0.000260275	2
																						4.42014	4.42014	4.41994		-0.000207711	-0.000207711	2
																						4.30068	4.30068	4.30053		-0.00014797	-0.00014797	2
																						4.16014	4.16014	4.16005		-8.1534e-05	-8.1534e-05	2
																						3.99687	3.99687	3.99686		-9.57968e-06	-9.57968e-06	2
																						3.80996	3.80996	3.81002		6.58991e-05	6.58991e-05	2
																						3.59955	3.59955	3.59969		0.000142063	0.000142063	2
																						3.3671	3.3671	3.36732		0.00021536	0.00021536	2
																						3.11561	3.11561	3.11589		0.000281843	0.000281843	2
																						2.84957	2.84957	2.84991		0.000337669	0.000337669	2
																						2.57474	2.57474	2.57512		0.000379677	0.000379677	2
																						2.29774	2.29774	2.29815		0.000405912	0.000405912	2
																						2.02537	2.02537	2.02578		0.000415941	0.000415941	2
																						1.76399	1.76399	1.7644		0.000410863	0.000410863	2
																						1.51896	1.51896	1.51935		0.000393025	0.000393025	2
																						3.87329	3.87329	3.87306		-0.000233091	-0.000233091	2
																						3.78722	3.78722	3.78703		-0.000184912	-0.000184912	2
																						3.68486	3.68486	3.68473		-0.000130161	-0.000130161	2
																						3.56444	3.56444	3.56437		-6.92849e-05	-6.92849e-05	2
																						3.42455	3.42455	3.42454		-3.36741e-06	-3.36741e-06	2
																						3.2644	3.2644	3.26447		6.57578e-05	6.57578e-05	2
																						3.08412	3.08412	3.08426		0.000135481	0.000135481	2
																						2.88496	2.88496	2.88516		0.000202539	0.000202539	2
																						2.66948	2.66948	2.66975		0.000263309	0.000263309	2
																						2.44153	2.44153	2.44185		0.000314262	0.000314262	2
																						2.20606	2.20606	2.20642		0.000352502	0.000352502	2
																						1.96872	1.96872	1.9691		0.000376242	0.000376242	2
																						1.73535	1.73535	1.73574		0.000385091	0.000385091	2
																						1.5114	1.5114	1.51178		0.000380068	0.000380068	2
																						1.30145	1.30145	1.30182		0.000363338	0.000363338	2
																						3.28526	3.28526	3.28506		-0.000205474	-0.000205474	2
																						3.21226	3.21226	3.21209		-0.000162189	-0.000162189	2
																						3.12544	3.12544	3.12533		-0.000113004	-0.000113004	2
																						3.0233	3.0233	3.02324		-5.8324e-05	-5.8324e-05	2
																						2.90465	2.90465	2.90465		8.73477e-07	8.73477e-07	2
																						2.76881	2.76881	2.76888		6.29365e-05	6.29365e-05	2
																						2.6159	2.6159	2.61603		0.000125516	0.000125516	2
																						2.44698	2.44698	2.44716		0.000185673	0.000185673	2
																						2.26421	2.26421	2.26445		0.000240149	0.000240149	2
																						2.07087	2.07087	2.07116		0.000285772	0.000285772	2
																						1.87115	1.87115	1.87147		0.000319939	0.000319939	2
																						1.66984	1.66984	1.67018		0.000341046	0.000341046	2
																						1.4719	1.4719	1.47225		0.000348749	0.000348749	2
																						1.28194	1.28194	1.28229		0.000343971	0.000343971	2
																						1.10387	1.10387	1.1042		0.000328667	0.000328667	2
																						2.76126	2.76126	2.76108		-0.000178521	-0.000178521	2
																						2.6999	2.6999	2.69976		-0.000140326	-0.000140326	2
																						2.62693	2.62693	2.62683		-9.69294e-05	-9.69294e-05	2
																						2.54108	2.54108	2.54103		-4.869e-05	-4.869e-05	2
																						2.44135	2.44135	2.44135		3.52762e-06	3.52762e-06	2
																						2.32718	2.32718	2.32724		5.82621e-05	5.82621e-05	2
																						2.19866	2.19866	2.19877		0.000113437	0.000113437	2
																						2.05668	2.05668	2.05685		0.000166456	0.000166456	2
																						1.90307	1.90307	1.90328		0.000214439	0.000214439	2
																						1.74056	1.74056	1.74082		0.000254587	0.000254587	2
																						1.5727	1.5727	1.57298		0.000284602	0.000284602	2
																						1.4035	1.4035	1.4038		0.00030307	0.00030307	2
																						1.23713	1.23713	1.23744		0.000309692	0.000309692	2
																						1.07747	1.07747	1.07778		0.000305288	0.000305288	2
																						0.927803	0.927803	0.928095		0.000291591	0.000291591	2
																						2.30224	2.30224	2.30209		-0.000153095	-0.000153095	2
																						2.25108	2.25108	2.25096		-0.000119925	-0.000119925	2
																						2.19024	2.19024	2.19016		-8.22406e-05	-8.22406e-05	2
																						2.11867	2.11867	2.11863		-4.03541e-05	-4.03541e-05	2
																						2.03552	2.03552	2.03552		4.98145e-06	4.98145e-06	2
																						1.94033	1.94033	1.94038		5.24947e-05	5.24947e-05	2
																						1.83317	1.83317	1.83327		0.00010038	0.00010038	2
																						1.71479	1.71479	1.71494		0.000146379	0.000146379	2
																						1.58671	1.58671	1.5869		0.000187991	0.000187991	2
																						1.45122	1.45122	1.45145		0.000222781	0.000222781	2
																						1.31126	1.31126	1.31151		0.000248753	0.000248753	2
																						1.17019	1.17019	1.17045		0.000264683	0.000264683	2
																						1.03147	1.03147	1.03174		0.000270312	0.000270312	2
																						0.89836	0.89836	0.898626		0.000266358	0.000266358	2
																						0.773571	0.773571	0.773825		0.000254328	0.000254328	2
																						1.90616	1.90616	1.90603		-0.000129793	-0.000129793	2
																						1.8638	1.8638	1.8637		-0.000101384	-0.000101384	2
																						1.81343	1.81343	1.81336		-6.91092e-05	-6.91092e-05	2
																						1.75416	1.75416	1.75413		-3.32386e-05	-3.32386e-05	2
																						1.68532	1.68532	1.68532		5.58207e-06	5.58207e-06	2
																						1.60651	1.60651	1.60655		4.62624e-05	4.62624e-05	2
																						1.51779	1.51779	1.51787		8.72537e-05	8.72537e-05	2
																						1.41977	1.41977	1.4199		0.000126621	0.000126621	2
																						1.31373	1.31373	1.31389		0.00016222	0.00016222	2
																						1.20155	1.20155	1.20174		0.000191965	0.000191965	2
																						1.08567	1.08567	1.08588		0.000214146	0.000214146	2
																						0.968866	0.968866	0.969094		0.000227715	0.000227715	2
																						0.854017	0.854017	0.854249		0.000232453	0.000232453	2
																						0.743804	0.743804	0.744032		0.000228977	0.000228977	2
																						0.640483	0.640483	0.640702		0.000218581	0.000218581	2
																						1.56879	1.56879	1.56868		-0.00010895	-0.00010895	2
																						1.53392	1.53392	1.53384		-8.49053e-05	-8.49053e-05	2
																						1.49247	1.49247	1.49241		-5.75907e-05	-5.75907e-05	2
																						1.44369	1.44369	1.44367		-2.72345e-05	-2.72345e-05	2
																						1.38703	1.38703	1.38704		5.61592e-06	5.61592e-06	2
																						1.32217	1.32217	1.32221		4.00365e-05	4.00365e-05	2
																						1.24915	1.24915	1.24923		7.47154e-05	7.47154e-05	2
																						1.16849	1.16849	1.16859		0.000108014	0.000108014	2
																						1.08121	1.08121	1.08135		0.000138116	0.000138116	2
																						0.988886	0.988886	0.989049		0.000163255	0.000163255	2
																						0.893514	0.893514	0.893696		0.000181985	0.000181985	2
																						0.797385	0.797385	0.797579		0.000193418	0.000193418	2
																						0.702863	0.702863	0.703061		0.000197372	0.000197372	2
																						0.612157	0.612157	0.612351		0.000194369	0.000194369	2
																						0.527124	0.527124	0.527309		0.000185509	0.000185509	2
[truncated: 54 more columns]

## Sheet: Partial Uncompetitive
																	((V_max+(V2*[I])/K_i )*[S])/(K_s+((1+[I])/K_i )*[S] )						Calculated values
		No Inhibitor	[I]1	[I]2	[I]3	[I]4	[I]5	[I]6	[I]7	[I]8	[I]9	[I]10	[I]11	[I]12	[I]13	[I]14	[I]15			0.141751	#DIV/0!	#DIV/0!	No Inhibitor	[I]1	[I]2	[I]3	[I]4	[I]5	[I]6	[I]7	[I]8	[I]9	[I]10	[I]11	[I]12	[I]13	[I]14	[I]15
		0	0.0439805	0.0549756	0.0687195	0.0858993	0.107374	0.134218	0.167772	0.209715	0.262144	0.32768	0.4096	0.512	0.64	0.8	1	Km	Vmax	Ki	V2	0	0	0.0439805	0.0549756	0.0687195	0.0858993	0.107374	0.134218	0.167772	0.209715	0.262144	0.32768	0.4096	0.512	0.64	0.8	1
[S]1	1	13.6364	10.1892	9.58357	8.92075	8.2109	7.46807	6.70934	5.9533	5.21827	4.5206	3.87329	3.28526	2.76126	2.30224	1.90616	1.56879	0.141751	13.4242	0.594309	0		7.35824	7.0714	7.00315	6.91967	6.81807	6.6952	6.5477	6.37222	6.16567	5.92557	5.65053	5.34067	4.99806	4.62703	4.23412	3.82783		7.35824	7.0714	7.00315	6.91967	6.81807	6.6952	6.5477	6.37222	6.16567	5.92557
[S]2	0.8	13.3333	9.9628	9.37061	8.72251	8.02843	7.30211	6.56025	5.82101	5.10231	4.42014	3.78722	3.21226	2.6999	2.25108	1.8638	1.53392						7.21803	6.94181	6.87603	6.79553	6.69753	6.57892	6.43645	6.2668	6.06692	5.83431	5.56748	5.26642	4.93297	4.57119	4.18732	3.78953		7.21803	6.94181	6.87603	6.79553	6.69753	6.57892	6.43645	6.2668	6.06692	5.83431
[S]3	0.64	12.973	9.69354	9.11735	8.48677	7.81145	7.10476	6.38294	5.66368	4.96441	4.30068	3.68486	3.12544	2.62693	2.19024	1.81343	1.49247						7.05011	6.78636	6.72348	6.64649	6.55271	6.43913	6.30259	6.13983	5.94785	5.72411	5.46705	5.17646	4.85396	4.50326	4.13025	3.74273		7.05011	6.78636	6.72348	6.64649	6.55271	6.43913	6.30259	6.13983	5.94785	5.72411
[S]4	0.512	12.549	9.37676	8.81939	8.20942	7.55617	6.87258	6.17435	5.47859	4.80218	4.16014	3.56444	3.0233	2.54108	2.11867	1.75416	1.44369						6.85088	6.60157	6.54205	6.46914	6.38026	6.27254	6.14289	5.98818	5.80542	5.59208	5.34648	5.06824	4.75869	4.42114	4.06107	3.68583		6.85088	6.60157	6.54205	6.46914	6.38026	6.27254	6.14289	5.98818	5.80542	5.59208
[S]5	0.4096	12.0565	9.00875	8.47326	7.88723	7.25962	6.60285	5.93203	5.26358	4.61371	3.99687	3.42455	2.90465	2.44135	2.03552	1.68532	1.38703						6.61715	6.38426	6.32858	6.26033	6.17706	6.07603	5.9543	5.80884	5.6367	5.43536	5.20305	4.93918	4.64472	4.32261	3.97778	3.61709		6.61715	6.38426	6.32858	6.26033	6.17706	6.07603	5.9543	5.80884	5.6367	5.43536
[S]6	0.32768	11.4927	8.58747	8.07702	7.5184	6.92013	6.29408	5.65462	5.01743	4.39795	3.80996	3.2644	2.76881	2.32718	1.94033	1.60651	1.32217						6.34649	6.13196	6.08057	6.01754	5.94056	5.84706	5.73425	5.59922	5.43911	5.2514	5.03424	4.7868	4.50973	4.20545	3.87835	3.53469		6.34649	6.13196	6.08057	6.01754	5.94056	5.84706	5.73425	5.59922	5.43911	5.2514
[S]7	0.262144	10.858	8.11321	7.63095	7.10318	6.53795	5.94648	5.34234	4.74034	4.15507	3.59955	3.08412	2.6159	2.19866	1.83317	1.51779	1.24915						6.03779	5.8433	5.79662	5.73931	5.66924	5.58403	5.48105	5.35755	5.21078	5.03825	4.83803	4.60906	4.35163	4.06764	3.76084	3.43682		6.03779	5.8433	5.79662	5.73931	5.66924	5.58403	5.48105	5.35755	5.21078	5.03825
[S]8	0.209715	10.1568	7.5893	7.13818	6.64449	6.11576	5.56248	4.99735	4.43423	3.88675	3.3671	2.88496	2.44698	2.05668	1.71479	1.41977	1.16849			Sum R2	860.012		5.69172	5.51857	5.47691	5.42572	5.36306	5.28674	5.19435	5.08329	4.95098	4.79498	4.61327	4.40462	4.16894	3.90758	3.62361	3.32186		5.69172	5.51857	5.47691	5.42572	5.36306	5.28674	5.19435	5.08329	4.95098	4.79498
[S]9	0.167772	9.39822	7.02245	6.60503	6.14821	5.65897	5.14702	4.6241	4.10303	3.59645	3.11561	2.66948	2.26421	1.90307	1.58671	1.31373	1.08121			Sum residuals %	86.2741		5.3112	5.16011	5.12368	5.07885	5.0239	4.95687	4.87556	4.77759	4.66053	4.52203	4.36007	4.17324	3.96107	3.72438	3.46553	3.18853		5.3112	5.16011	5.12368	5.07885	5.0239	4.95687	4.87556	4.77759	4.66053	4.52203
[S]10	0.134218	8.5957	6.4228	6.04102	5.62321	5.17575	4.70751	4.22924	3.75267	3.28935	2.84957	2.44153	2.07087	1.74056	1.45122	1.20155	0.988886						4.90157	4.77261	4.74143	4.70301	4.65586	4.59823	4.52818	4.44355	4.34211	4.22165	4.08016	3.91609	3.72868	3.51821	3.28633	3.0362		4.90157	4.77261	4.74143	4.70301	4.65586	4.59823	4.52818	4.44355	4.34211	4.22165
[S]11	0.107374	7.7667	5.80336	5.4584	5.08088	4.67658	4.2535	3.82136	3.39075	2.97211	2.57474	2.20606	1.87115	1.5727	1.31126	1.08567	0.893514						4.47058	4.36305	4.33698	4.30481	4.26528	4.21686	4.15787	4.08641	4.00047	3.89799	3.77705	3.63603	3.47391	3.29051	3.08681	2.8651		4.47058	4.36305	4.33698	4.30481	4.26528	4.21686	4.15787	4.08641	4.00047	3.89799
[S]12	0.0858993	6.93112	5.179	4.87116	4.53426	4.17345	3.79589	3.41024	3.02596	2.65235	2.29774	1.96872	1.66984	1.4035	1.17019	0.968866	0.797385						4.02787	3.94038	3.9191	3.89281	3.86045	3.82075	3.77226	3.71334	3.64224	3.5571	3.45611	3.33767	3.20056	3.04424	2.86908	2.67657		4.02787	3.94038	3.9191	3.89281	3.86045	3.82075	3.77226	3.71334	3.64224	3.5571
[S]13	0.0687195	6.1095	4.56508	4.29373	3.99677	3.67873	3.34592	3.00599	2.66726	2.33794	2.02537	1.73535	1.4719	1.23713	1.03147	0.854017	0.702863						3.58421	3.51476	3.49782	3.47687	3.45103	3.41927	3.38038	3.33299	3.27559	3.20657	3.12428	3.02716	2.91395	2.7838	2.6366	2.47314		3.58421	3.51476	3.49782	3.47687	3.45103	3.41927	3.38038	3.33299	3.27559	3.20657
[S]14	0.0549756	5.32106	3.97595	3.73961	3.48097	3.20398	2.91412	2.61806	2.32304	2.03623	1.76399	1.5114	1.28194	1.07747	0.89836	0.743804	0.612157						3.15043	3.09665	3.08349	3.0672	3.04708	3.02229	2.99186	2.95468	2.90949	2.8549	2.78949	2.71181	2.6206	2.51486	2.39412	2.25856		3.15043	3.09665	3.08349	3.0672	3.04708	3.02229	2.99186	2.95468	2.90949	2.8549
[S]15	0.0439805	4.58192	3.42366	3.22015	2.99744	2.75892	2.50933	2.25439	2.00035	1.75338	1.51896	1.30145	1.10387	0.927803	0.773571	0.640483	0.527124						2.73646	2.6958	2.68582	2.67345	2.65815	2.63926	2.61603	2.58756	2.55283	2.51071	2.45998	2.39937	2.32769	2.24389	2.14726	2.03758		2.73646	2.6958	2.68582	2.67345	2.65815	2.63926	2.61603	2.58756	2.55283	2.51071
	1	1	1	1	1	1	1	1	1	1	1	1	1	1	1	1	1																					1	1	7.35824	7.0714	7.00315	6.91967	6.81807	6.6952	6.5477	6.37222	6.16567	5.92557
	1	1	1	1	1	1	1	1	1	1	1	1	1	1	1	1	1					13.6364	13.6364	7.35824		-6.27813	-6.27813	3										0.8	0.8	7.21803	6.94181	6.87603	6.79553	6.69753	6.57892	6.43645	6.2668	6.06692	5.83431
	1	1	1	1	1	1	1	1	1	1	1	1	1	1	1	1	1					13.3333	13.3333	7.21803		-6.11531	-6.11531	3										0.64	0.64	7.05011	6.78636	6.72348	6.64649	6.55271	6.43913	6.30259	6.13983	5.94785	5.72411
	1	1	1	1	1	1	1	1	1	1	1	1	1	1	1	1	1					12.973	12.973	7.05011		-5.92287	-5.92287	3										0.512	0.512	6.85088	6.60157	6.54205	6.46914	6.38026	6.27254	6.14289	5.98818	5.80542	5.59208
	1	1	1	1	1	1	1	1	1	1	1	1	1	1	1	1	1					12.549	12.549	6.85088		-5.69814	-5.69814	3										0.4096	0.4096	6.61715	6.38426	6.32858	6.26033	6.17706	6.07603	5.9543	5.80884	5.6367	5.43536
	1	1	1	1	1	1	1	1	1	1	1	1	1	1	1	1	1					12.0565	12.0565	6.61715		-5.43937	-5.43937	3										0.32768	0.32768	6.34649	6.13196	6.08057	6.01754	5.94056	5.84706	5.73425	5.59922	5.43911	5.2514
	1	1	1	1	1	1	1	1	1	1	1	1	1	1	1	1	1					11.4927	11.4927	6.34649		-5.14622	-5.14622	3										0.262144	0.262144	6.03779	5.8433	5.79662	5.73931	5.66924	5.58403	5.48105	5.35755	5.21078	5.03825
	1	1	1	1	1	1	1	1	1	1	1	1	1	1	1	1	1					10.858	10.858	6.03779		-4.82021	-4.82021	3										0.209715	0.209715	5.69172	5.51857	5.47691	5.42572	5.36306	5.28674	5.19435	5.08329	4.95098	4.79498
	1	1	1	1	1	1	1	1	1	1	1	1	1	1	1	1	1					10.1568	10.1568	5.69172		-4.46512	-4.46512	3										0.167772	0.167772	5.3112	5.16011	5.12368	5.07885	5.0239	4.95687	4.87556	4.77759	4.66053	4.52203
	1	1	1	1	1	1	1	1	1	1	1	1	1	1	1	1	1					9.39822	9.39822	5.3112		-4.08703	-4.08703	3										0.134218	0.134218	4.90157	4.77261	4.74143	4.70301	4.65586	4.59823	4.52818	4.44355	4.34211	4.22165
	1	1	1	1	1	1	1	1	1	1	1	1	1	1	1	1	1					8.5957	8.5957	4.90157		-3.69413	-3.69413	3										0.107374	0.107374	4.47058	4.36305	4.33698	4.30481	4.26528	4.21686	4.15787	4.08641	4.00047	3.89799
	1	1	1	1	1	1	1	1	1	1	1	1	1	1	1	1	1					7.7667	7.7667	4.47058		-3.29612	-3.29612	3										0.0858993	0.0858993	4.02787	3.94038	3.9191	3.89281	3.86045	3.82075	3.77226	3.71334	3.64224	3.5571
	1	1	1	1	1	1	1	1	1	1	1	1	1	1	1	1	1					6.93112	6.93112	4.02787		-2.90325	-2.90325	3										0.0687195	0.0687195	3.58421	3.51476	3.49782	3.47687	3.45103	3.41927	3.38038	3.33299	3.27559	3.20657
	1	1	1	1	1	1	1	1	1	1	1	1	1	1	1	1	1					6.1095	6.1095	3.58421		-2.5253	-2.5253	3										0.0549756	0.0549756	3.15043	3.09665	3.08349	3.0672	3.04708	3.02229	2.99186	2.95468	2.90949	2.8549
	1	1	1	1	1	1	1	1	1	1	1	1	1	1	1	1	1					5.32106	5.32106	3.15043		-2.17062	-2.17062	3										0.0439805	0.0439805	2.73646	2.6958	2.68582	2.67345	2.65815	2.63926	2.61603	2.58756	2.55283	2.51071
																						4.58192	4.58192	2.73646		-1.84546	-1.84546	3
																						10.1892	10.1892	7.0714		-3.11784	-3.11784	3											1	0.135902	0.141415	0.142793	0.144516	0.146669	0.149361	0.152725	0.156931	0.162188	0.16876
																						9.9628	9.9628	6.94181		-3.02099	-3.02099	3											1.25	0.138542	0.144055	0.145433	0.147155	0.149309	0.152001	0.155365	0.159571	0.164828	0.1714
																						9.69354	9.69354	6.78636		-2.90718	-2.90718	3											1.5625	0.141842	0.147354	0.148733	0.150455	0.152609	0.1553	0.158665	0.162871	0.168128	0.1747
																						9.37676	9.37676	6.60157		-2.77519	-2.77519	3											1.95312	0.145967	0.151479	0.152857	0.15458	0.156733	0.159425	0.16279	0.166996	0.172253	0.178824
																						9.00875	9.00875	6.38426		-2.62449	-2.62449	3											2.44141	0.151122	0.156635	0.158013	0.159736	0.161889	0.164581	0.167946	0.172152	0.177409	0.18398
																						8.58747	8.58747	6.13196		-2.45551	-2.45551	3											3.05176	0.157567	0.16308	0.164458	0.166181	0.168334	0.171026	0.174391	0.178596	0.183854	0.190425
																						8.11321	8.11321	5.8433		-2.26991	-2.26991	3											3.8147	0.165624	0.171136	0.172514	0.174237	0.17639	0.179082	0.182447	0.186653	0.19191	0.198481
																						7.5893	7.5893	5.51857		-2.07073	-2.07073	3											4.76837	0.175694	0.181206	0.182585	0.184307	0.186461	0.189152	0.192517	0.196723	0.20198	0.208552
																						7.02245	7.02245	5.16011		-1.86234	-1.86234	3											5.96046	0.188282	0.193794	0.195172	0.196895	0.199048	0.20174	0.205105	0.209311	0.214568	0.221139
																						6.4228	6.4228	4.77261		-1.65019	-1.65019	3											7.45058	0.204016	0.209529	0.210907	0.21263	0.214783	0.217475	0.220839	0.225045	0.230303	0.236874
																						5.80336	5.80336	4.36305		-1.4403	-1.4403	3											9.31323	0.223685	0.229197	0.230575	0.232298	0.234451	0.237143	0.240508	0.244714	0.249971	0.256542
																						5.179	5.179	3.94038		-1.23862	-1.23862	3											11.6415	0.24827	0.253783	0.255161	0.256884	0.259037	0.261729	0.265093	0.269299	0.274556	0.281128
																						4.56508	4.56508	3.51476		-1.05032	-1.05032	3											14.5519	0.279002	0.284514	0.285893	0.287615	0.289769	0.29246	0.295825	0.300031	0.305288	0.31186
																						3.97595	3.97595	3.09665		-0.879295	-0.879295	3											18.1899	0.317417	0.322929	0.324307	0.32603	0.328183	0.330875	0.33424	0.338446	0.343703	0.350274
																						3.42366	3.42366	2.6958		-0.72786	-0.72786	3											22.7374	0.365435	0.370948	0.372326	0.374049	0.376202	0.378894	0.382258	0.386464	0.391721	0.398293
																						9.58357	9.58357	7.00315		-2.58043	-2.58043	3
																						9.37061	9.37061	6.87603		-2.49458	-2.49458	3												13.6364	10.1892	9.58357	8.92075	8.2109	7.46807	6.70934	5.9533	5.21827	4.5206
																						9.11735	9.11735	6.72348		-2.39387	-2.39387	3												13.3333	9.9628	9.37061	8.72251	8.02843	7.30211	6.56025	5.82101	5.10231	4.42014
																						8.81939	8.81939	6.54205		-2.27735	-2.27735	3												12.973	9.69354	9.11735	8.48677	7.81145	7.10476	6.38294	5.66368	4.96441	4.30068
																						8.47326	8.47326	6.32858		-2.14468	-2.14468	3												12.549	9.37676	8.81939	8.20942	7.55617	6.87258	6.17435	5.47859	4.80218	4.16014
																						8.07702	8.07702	6.08057		-1.99645	-1.99645	3												12.0565	9.00875	8.47326	7.88723	7.25962	6.60285	5.93203	5.26358	4.61371	3.99687
																						7.63095	7.63095	5.79662		-1.83434	-1.83434	3												11.4927	8.58747	8.07702	7.5184	6.92013	6.29408	5.65462	5.01743	4.39795	3.80996
																						7.13818	7.13818	5.47691		-1.66127	-1.66127	3												10.858	8.11321	7.63095	7.10318	6.53795	5.94648	5.34234	4.74034	4.15507	3.59955
																						6.60503	6.60503	5.12368		-1.48135	-1.48135	3												10.1568	7.5893	7.13818	6.64449	6.11576	5.56248	4.99735	4.43423	3.88675	3.3671
																						6.04102	6.04102	4.74143		-1.2996	-1.2996	3												9.39822	7.02245	6.60503	6.14821	5.65897	5.14702	4.6241	4.10303	3.59645	3.11561
																						5.4584	5.4584	4.33698		-1.12142	-1.12142	3												8.5957	6.4228	6.04102	5.62321	5.17575	4.70751	4.22924	3.75267	3.28935	2.84957
																						4.87116	4.87116	3.9191		-0.952061	-0.952061	3												7.7667	5.80336	5.4584	5.08088	4.67658	4.2535	3.82136	3.39075	2.97211	2.57474
																						4.29373	4.29373	3.49782		-0.795915	-0.795915	3												6.93112	5.179	4.87116	4.53426	4.17345	3.79589	3.41024	3.02596	2.65235	2.29774
																						3.73961	3.73961	3.08349		-0.65612	-0.65612	3												6.1095	4.56508	4.29373	3.99677	3.67873	3.34592	3.00599	2.66726	2.33794	2.02537
																						3.22015	3.22015	2.68582		-0.534333	-0.534333	3												5.32106	3.97595	3.73961	3.48097	3.20398	2.91412	2.61806	2.32304	2.03623	1.76399
																						8.92075	8.92075	6.91967		-2.00109	-2.00109	3												4.58192	3.42366	3.22015	2.99744	2.75892	2.50933	2.25439	2.00035	1.75338	1.51896
																						8.72251	8.72251	6.79553		-1.92698	-1.92698	3
																						8.48677	8.48677	6.64649		-1.84028	-1.84028	3												1/s	0	0.0439805	0.0549756	0.0687195	0.0858993	0.107374	0.134218	0.167772	0.209715
																						8.20942	8.20942	6.46914		-1.74028	-1.74028	3											1	1	0.135902	0.141415	0.142793	0.144516	0.146669	0.149361	0.152725	0.156931	0.162188
																						7.88723	7.88723	6.26033		-1.6269	-1.6269	3											2	1.25	0.138542	0.144055	0.145433	0.147155	0.149309	0.152001	0.155365	0.159571	0.164828
																						7.5184	7.5184	6.01754		-1.50086	-1.50086	3											3	1.5625	0.141842	0.147354	0.148733	0.150455	0.152609	0.1553	0.158665	0.162871	0.168128
																						7.10318	7.10318	5.73931		-1.36387	-1.36387	3											4	1.95312	0.145967	0.151479	0.152857	0.15458	0.156733	0.159425	0.16279	0.166996	0.172253
																						6.64449	6.64449	5.42572		-1.21877	-1.21877	3											5	2.44141	0.151122	0.156635	0.158013	0.159736	0.161889	0.164581	0.167946	0.172152	0.177409
																						6.14821	6.14821	5.07885		-1.06936	-1.06936	3											6	3.05176	0.157567	0.16308	0.164458	0.166181	0.168334	0.171026	0.174391	0.178596	0.183854
																						5.62321	5.62321	4.70301		-0.920199	-0.920199	3											7	3.8147	0.165624	0.171136	0.172514	0.174237	0.17639	0.179082	0.182447	0.186653	0.19191
																						5.08088	5.08088	4.30481		-0.776071	-0.776071	3											8	4.76837	0.175694	0.181206	0.182585	0.184307	0.186461	0.189152	0.192517	0.196723	0.20198
																						4.53426	4.53426	3.89281		-0.641443	-0.641443	3											9	5.96046	0.188282	0.193794	0.195172	0.196895	0.199048	0.20174	0.205105	0.209311	0.214568
																						3.99677	3.99677	3.47687		-0.519901	-0.519901	3											10	7.45058	0.204016	0.209529	0.210907	0.21263	0.214783	0.217475	0.220839	0.225045	0.230303
																						3.48097	3.48097	3.0672		-0.413772	-0.413772	3											11	9.31323	0.223685	0.229197	0.230575	0.232298	0.234451	0.237143	0.240508	0.244714	0.249971
																						2.99744	2.99744	2.67345		-0.32399	-0.32399	3											12	11.6415	0.24827	0.253783	0.255161	0.256884	0.259037	0.261729	0.265093	0.269299	0.274556
																						8.2109	8.2109	6.81807		-1.39282	-1.39282	3											13	14.5519	0.279002	0.284514	0.285893	0.287615	0.289769	0.29246	0.295825	0.300031	0.305288
																						8.02843	8.02843	6.69753		-1.33091	-1.33091	3											14	18.1899	0.317417	0.322929	0.324307	0.32603	0.328183	0.330875	0.33424	0.338446	0.343703
																						7.81145	7.81145	6.55271		-1.25874	-1.25874	3											15	22.7374	0.365435	0.370948	0.372326	0.374049	0.376202	0.378894	0.382258	0.386464	0.391721
																						7.55617	7.55617	6.38026		-1.17591	-1.17591	3
																						7.25962	7.25962	6.17706		-1.08256	-1.08256	3
																						6.92013	6.92013	5.94056		-0.97957	-0.97957	3
																						6.53795	6.53795	5.66924		-0.868714	-0.868714	3
																						6.11576	6.11576	5.36306		-0.752702	-0.752702	3
																						5.65897	5.65897	5.0239		-0.635071	-0.635071	3
																						5.17575	5.17575	4.65586		-0.519891	-0.519891	3
																						4.67658	4.67658	4.26528		-0.411306	-0.411306	3
																						4.17345	4.17345	3.86045		-0.312997	-0.312997	3
																						3.67873	3.67873	3.45103		-0.227702	-0.227702	3
																						3.20398	3.20398	3.04708		-0.156905	-0.156905	3
																						2.75892	2.75892	2.65815		-0.100776	-0.100776	3
																						7.46807	7.46807	6.6952		-0.772871	-0.772871	3
																						7.30211	7.30211	6.57892		-0.723192	-0.723192	3
																						7.10476	7.10476	6.43913		-0.665625	-0.665625	3
																						6.87258	6.87258	6.27254		-0.600041	-0.600041	3
																						6.60285	6.60285	6.07603		-0.526821	-0.526821	3
																						6.29408	6.29408	5.84706		-0.447014	-0.447014	3
																						5.94648	5.94648	5.58403		-0.362448	-0.362448	3
																						5.56248	5.56248	5.28674		-0.275738	-0.275738	3
																						5.14702	5.14702	4.95687		-0.190145	-0.190145	3
																						4.70751	4.70751	4.59823		-0.109276	-0.109276	3
																						4.2535	4.2535	4.21686		-0.0366369	-0.0366369	3
																						3.79589	3.79589	3.82075		0.0248656	0.0248656	3
																						3.34592	3.34592	3.41927		0.0733443	0.0733443	3
																						2.91412	2.91412	3.02229		0.108166	0.108166	3
																						2.50933	2.50933	2.63926		0.129935	0.129935	3
																						6.70934	6.70934	6.5477		-0.161642	-0.161642	3
																						6.56025	6.56025	6.43645		-0.123799	-0.123799	3
																						6.38294	6.38294	6.30259		-0.080356	-0.080356	3
																						6.17435	6.17435	6.14289		-0.0314575	-0.0314575	3
																						5.93203	5.93203	5.9543		0.0222768	0.0222768	3
																						5.65462	5.65462	5.73425		0.0796294	0.0796294	3
																						5.34234	5.34234	5.48105		0.138712	0.138712	3
																						4.99735	4.99735	5.19435		0.196993	0.196993	3
																						4.6241	4.6241	4.87556		0.251458	0.251458	3
																						4.22924	4.22924	4.52818		0.298932	0.298932	3
																						3.82136	3.82136	4.15787		0.33651	0.33651	3
																						3.41024	3.41024	3.77226		0.362019	0.362019	3
																						3.00599	3.00599	3.38038		0.374388	0.374388	3
																						2.61806	2.61806	2.99186		0.373806	0.373806	3
																						2.25439	2.25439	2.61603		0.361643	0.361643	3
																						5.9533	5.9533	6.37222		0.418919	0.418919	3
																						5.82101	5.82101	6.2668		0.445796	0.445796	3
																						5.66368	5.66368	6.13983		0.476154	0.476154	3
																						5.47859	5.47859	5.98818		0.509589	0.509589	3
																						5.26358	5.26358	5.80884		0.545258	0.545258	3
																						5.01743	5.01743	5.59922		0.581783	0.581783	3
																						4.74034	4.74034	5.35755		0.61721	0.61721	3
																						4.43423	4.43423	5.08329		0.649067	0.649067	3
																						4.10303	4.10303	4.77759		0.674557	0.674557	3
																						3.75267	3.75267	4.44355		0.690878	0.690878	3
																						3.39075	3.39075	4.08641		0.69566	0.69566	3
																						3.02596	3.02596	3.71334		0.687388	0.687388	3
																						2.66726	2.66726	3.33299		0.665731	0.665731	3
																						2.32304	2.32304	2.95468		0.631642	0.631642	3
																						2.00035	2.00035	2.58756		0.587209	0.587209	3
																						5.21827	5.21827	6.16567		0.947393	0.947393	3
																						5.10231	5.10231	6.06692		0.964607	0.964607	3
																						4.96441	4.96441	5.94785		0.983433	0.983433	3
																						4.80218	4.80218	5.80542		1.00324	1.00324	3
																						4.61371	4.61371	5.6367		1.02299	1.02299	3
																						4.39795	4.39795	5.43911		1.04115	1.04115	3
																						4.15507	4.15507	5.21078		1.05571	1.05571	3
																						3.88675	3.88675	4.95098		1.06423	1.06423	3
																						3.59645	3.59645	4.66053		1.06408	1.06408	3
																						3.28935	3.28935	4.34211		1.05277	1.05277	3
																						2.97211	2.97211	4.00047		1.02836	1.02836	3
																						2.65235	2.65235	3.64224		0.989885	0.989885	3
																						2.33794	2.33794	3.27559		0.937649	0.937649	3
																						2.03623	2.03623	2.90949		0.873262	0.873262	3
																						1.75338	1.75338	2.55283		0.799456	0.799456	3
																						4.5206	4.5206	5.92557		1.40497	1.40497	3
																						4.42014	4.42014	5.83431		1.41417	1.41417	3
																						4.30068	4.30068	5.72411		1.42343	1.42343	3
																						4.16014	4.16014	5.59208		1.43194	1.43194	3
																						3.99687	3.99687	5.43536		1.4385	1.4385	3
																						3.80996	3.80996	5.2514		1.44145	1.44145	3
																						3.59955	3.59955	5.03825		1.43871	1.43871	3
																						3.3671	3.3671	4.79498		1.42787	1.42787	3
																						3.11561	3.11561	4.52203		1.40642	1.40642	3
																						2.84957	2.84957	4.22165		1.37208	1.37208	3
																						2.57474	2.57474	3.89799		1.32325	1.32325	3
																						2.29774	2.29774	3.5571		1.25936	1.25936	3
																						2.02537	2.02537	3.20657		1.1812	1.1812	3
																						1.76399	1.76399	2.8549		1.09092	1.09092	3
																						1.51896	1.51896	2.51071		0.991758	0.991758	3
																						3.87329	3.87329	5.65053		1.77724	1.77724	3
																						3.78722	3.78722	5.56748		1.78027	1.78027	3
																						3.68486	3.68486	5.46705		1.78219	1.78219	3
																						3.56444	3.56444	5.34648		1.78204	1.78204	3
																						3.42455	3.42455	5.20305		1.77851	1.77851	3
																						3.2644	3.2644	5.03424		1.76984	1.76984	3
																						3.08412	3.08412	4.83803		1.7539	1.7539	3
																						2.88496	2.88496	4.61327		1.72831	1.72831	3
																						2.66948	2.66948	4.36007		1.69059	1.69059	3
																						2.44153	2.44153	4.08016		1.63862	1.63862	3
																						2.20606	2.20606	3.77705		1.57099	1.57099	3
																						1.96872	1.96872	3.45611		1.48739	1.48739	3
																						1.73535	1.73535	3.12428		1.38892	1.38892	3
																						1.5114	1.5114	2.78949		1.27809	1.27809	3
																						1.30145	1.30145	2.45998		1.15853	1.15853	3
																						3.28526	3.28526	5.34067		2.0554	2.0554	3
																						3.21226	3.21226	5.26642		2.05416	2.05416	3
																						3.12544	3.12544	5.17646		2.05102	2.05102	3
																						3.0233	3.0233	5.06824		2.04495	2.04495	3
																						2.90465	2.90465	4.93918		2.03453	2.03453	3
																						2.76881	2.76881	4.7868		2.01799	2.01799	3
																						2.6159	2.6159	4.60906		1.99316	1.99316	3
																						2.44698	2.44698	4.40462		1.95764	1.95764	3
																						2.26421	2.26421	4.17324		1.90903	1.90903	3
																						2.07087	2.07087	3.91609		1.84522	1.84522	3
																						1.87115	1.87115	3.63603		1.76489	1.76489	3
																						1.66984	1.66984	3.33767		1.66783	1.66783	3
																						1.4719	1.4719	3.02716		1.55527	1.55527	3
																						1.28194	1.28194	2.71181		1.42987	1.42987	3
																						1.10387	1.10387	2.39937		1.2955	1.2955	3
																						2.76126	2.76126	4.99806		2.2368	2.2368	3
																						2.6999	2.6999	4.93297		2.23308	2.23308	3
																						2.62693	2.62693	4.85396		2.22704	2.22704	3
																						2.54108	2.54108	4.75869		2.21761	2.21761	3
																						2.44135	2.44135	4.64472		2.20337	2.20337	3
																						2.32718	2.32718	4.50973		2.18254	2.18254	3
																						2.19866	2.19866	4.35163		2.15297	2.15297	3
																						2.05668	2.05668	4.16894		2.11226	2.11226	3
																						1.90307	1.90307	3.96107		2.058	2.058	3
																						1.74056	1.74056	3.72868		1.98811	1.98811	3
																						1.5727	1.5727	3.47391		1.90121	1.90121	3
																						1.4035	1.4035	3.20056		1.79706	1.79706	3
																						1.23713	1.23713	2.91395		1.67682	1.67682	3
																						1.07747	1.07747	2.6206		1.54313	1.54313	3
																						0.927803	0.927803	2.32769		1.39989	1.39989	3
																						2.30224	2.30224	4.62703		2.32478	2.32478	3
																						2.25108	2.25108	4.57119		2.32011	2.32011	3
																						2.19024	2.19024	4.50326		2.31302	2.31302	3
																						2.11867	2.11867	4.42114		2.30248	2.30248	3
																						2.03552	2.03552	4.32261		2.28709	2.28709	3
																						1.94033	1.94033	4.20545		2.26512	2.26512	3
																						1.83317	1.83317	4.06764		2.23447	2.23447	3
																						1.71479	1.71479	3.90758		2.19278	2.19278	3
																						1.58671	1.58671	3.72438		2.13767	2.13767	3
																						1.45122	1.45122	3.51821		2.06699	2.06699	3
																						1.31126	1.31126	3.29051		1.97925	1.97925	3
																						1.17019	1.17019	3.04424		1.87405	1.87405	3
																						1.03147	1.03147	2.7838		1.75233	1.75233	3
																						0.89836	0.89836	2.51486		1.6165	1.6165	3
																						0.773571	0.773571	2.24389		1.47032	1.47032	3
																						1.90616	1.90616	4.23412		2.32797	2.32797	3
																						1.8638	1.8638	4.18732		2.32352	2.32352	3
																						1.81343	1.81343	4.13025		2.31682	2.31682	3
																						1.75416	1.75416	4.06107		2.3069	2.3069	3
																						1.68532	1.68532	3.97778		2.29246	2.29246	3
																						1.60651	1.60651	3.87835		2.27184	2.27184	3
																						1.51779	1.51779	3.76084		2.24306	2.24306	3
																						1.41977	1.41977	3.62361		2.20383	2.20383	3
																						1.31373	1.31373	3.46553		2.1518	2.1518	3
																						1.20155	1.20155	3.28633		2.08478	2.08478	3
																						1.08567	1.08567	3.08681		2.00114	2.00114	3
																						0.968866	0.968866	2.86908		1.90021	1.90021	3
																						0.854017	0.854017	2.6366		1.78259	1.78259	3
																						0.743804	0.743804	2.39412		1.65031	1.65031	3
																						0.640483	0.640483	2.14726		1.50678	1.50678	3
																						1.56879	1.56879	3.82783		2.25904	2.25904	3
																						1.53392	1.53392	3.78953		2.25561	2.25561	3
																						1.49247	1.49247	3.74273		2.25026	2.25026	3
																						1.44369	1.44369	3.68583		2.24214	2.24214	3
																						1.38703	1.38703	3.61709		2.23006	2.23006	3
																						1.32217	1.32217	3.53469		2.21252	2.21252	3
																						1.24915	1.24915	3.43682		2.18767	2.18767	3
																						1.16849	1.16849	3.32186		2.15337	2.15337	3
																						1.08121	1.08121	3.18853		2.10732	2.10732	3
																						0.988886	0.988886	3.0362		2.04731	2.04731	3
																						0.893514	0.893514	2.8651		1.97159	1.97159	3
																						0.797385	0.797385	2.67657		1.87918	1.87918	3
																						0.702863	0.702863	2.47314		1.77027	1.77027	3
																						0.612157	0.612157	2.25856		1.64641	1.64641	3
																						0.527124	0.527124	2.03758		1.51046	1.51046	3
[truncated: 54 more columns]

## Sheet: partial Mixed Non-competitive
																		(V_max*((1+([I]/(K_i^' ))*(β))*([S]/K_s )))/((1+([I]/(K_i^' )))*(([S]/K_s )+((1+([I]/(K_i^' ))*((K_s^')/K_s )))/((1+([I]/(K_i^' ))) )) )					Calculated values
		No Inhibitor	[I]1	[I]2	[I]3	[I]4	[I]5	[I]6	[I]7	[I]8	[I]9	[I]10	[I]11	[I]12	[I]13	[I]14	[I]15	Ks			Ks'		No Inhibitor	[I]1	[I]2	[I]3	[I]4	[I]5	[I]6	[I]7	[I]8	[I]9	[I]10	[I]11	[I]12	[I]13	[I]14	[I]15
		0	0.0439805	0.0549756	0.0687195	0.0858993	0.107374	0.134218	0.167772	0.209715	0.262144	0.32768	0.4096	0.512	0.64	0.8	1	Km	Vmax	Ki'	Km'	b	0	0.0439805	0.0549756	0.0687195	0.0858993	0.107374	0.134218	0.167772	0.209715	0.262144	0.32768	0.4096	0.512	0.64	0.8	1
[S]1	1	13.6364	10.1892	9.58357	8.92075	8.2109	7.46807	6.70934	5.9533	5.21827	4.5206	3.87329	3.28526	2.76126	2.30224	1.90616	1.56879	0.0999978	14.9999	0.130002	0.100001	0	13.6363	10.1892	9.58354	8.92073	8.21088	7.46806	6.70933	5.9533	5.21827	4.5206	3.87329	3.28527	2.76126	2.30225	1.90616	1.56879		13.6363	10.1892	9.58354	8.92073	8.21088	7.46806	6.70933	5.9533	5.21827	4.5206
[S]2	0.8	13.3333	9.9628	9.37061	8.72251	8.02843	7.30211	6.56025	5.82101	5.10231	4.42014	3.78722	3.21226	2.6999	2.25108	1.8638	1.53392						13.3333	9.96277	9.37058	8.72249	8.02842	7.3021	6.56024	5.821	5.10231	4.42015	3.78722	3.21226	2.6999	2.25109	1.8638	1.53393		13.3333	9.96277	9.37058	8.72249	8.02842	7.3021	6.56024	5.821	5.10231	4.42015
[S]3	0.64	12.973	9.69354	9.11735	8.48677	7.81145	7.10476	6.38294	5.66368	4.96441	4.30068	3.68486	3.12544	2.62693	2.19024	1.81343	1.49247			Sum R2	4.44334e-08		12.9729	9.69351	9.11732	8.48675	7.81143	7.10475	6.38294	5.66368	4.96441	4.30068	3.68486	3.12544	2.62693	2.19025	1.81343	1.49247		12.9729	9.69351	9.11732	8.48675	7.81143	7.10475	6.38294	5.66368	4.96441	4.30068
[S]4	0.512	12.549	9.37676	8.81939	8.20942	7.55617	6.87258	6.17435	5.47859	4.80218	4.16014	3.56444	3.0233	2.54108	2.11867	1.75416	1.44369			Sum residuals %	0.000398793		12.549	9.37673	8.81937	8.20941	7.55616	6.87257	6.17435	5.47859	4.80218	4.16014	3.56444	3.0233	2.54108	2.11867	1.75417	1.4437		12.549	9.37673	8.81937	8.20941	7.55616	6.87257	6.17435	5.47859	4.80218	4.16014
[S]5	0.4096	12.0565	9.00875	8.47326	7.88723	7.25962	6.60285	5.93203	5.26358	4.61371	3.99687	3.42455	2.90465	2.44135	2.03552	1.68532	1.38703						12.0565	9.00873	8.47325	7.88722	7.25961	6.60285	5.93203	5.26358	4.61371	3.99687	3.42455	2.90465	2.44135	2.03552	1.68532	1.38704		12.0565	9.00873	8.47325	7.88722	7.25961	6.60285	5.93203	5.26358	4.61371	3.99687
[S]6	0.32768	11.4927	8.58747	8.07702	7.5184	6.92013	6.29408	5.65462	5.01743	4.39795	3.80996	3.2644	2.76881	2.32718	1.94033	1.60651	1.32217						11.4927	8.58745	8.07701	7.51839	6.92013	6.29408	5.65462	5.01743	4.39796	3.80996	3.26441	2.76882	2.32719	1.94033	1.60651	1.32217		11.4927	8.58745	8.07701	7.51839	6.92013	6.29408	5.65462	5.01743	4.39796	3.80996
[S]7	0.262144	10.858	8.11321	7.63095	7.10318	6.53795	5.94648	5.34234	4.74034	4.15507	3.59955	3.08412	2.6159	2.19866	1.83317	1.51779	1.24915						10.858	8.1132	7.63095	7.10318	6.53795	5.94648	5.34234	4.74034	4.15507	3.59955	3.08412	2.6159	2.19866	1.83317	1.51779	1.24915		10.858	8.1132	7.63095	7.10318	6.53795	5.94648	5.34234	4.74034	4.15507	3.59955
[S]8	0.209715	10.1568	7.5893	7.13818	6.64449	6.11576	5.56248	4.99735	4.43423	3.88675	3.3671	2.88496	2.44698	2.05668	1.71479	1.41977	1.16849						10.1568	7.58929	7.13818	6.64449	6.11576	5.56248	4.99736	4.43423	3.88676	3.36711	2.88497	2.44698	2.05668	1.71479	1.41978	1.16849		10.1568	7.58929	7.13818	6.64449	6.11576	5.56248	4.99736	4.43423	3.88676	3.36711
[S]9	0.167772	9.39822	7.02245	6.60503	6.14821	5.65897	5.14702	4.6241	4.10303	3.59645	3.11561	2.66948	2.26421	1.90307	1.58671	1.31373	1.08121						9.39822	7.02245	6.60503	6.14821	5.65898	5.14702	4.6241	4.10304	3.59645	3.11562	2.66949	2.26422	1.90307	1.58672	1.31373	1.08121		9.39822	7.02245	6.60503	6.14821	5.65898	5.14702	4.6241	4.10304	3.59645	3.11562
[S]10	0.134218	8.5957	6.4228	6.04102	5.62321	5.17575	4.70751	4.22924	3.75267	3.28935	2.84957	2.44153	2.07087	1.74056	1.45122	1.20155	0.988886						8.59571	6.42281	6.04103	5.62322	5.17576	4.70752	4.22925	3.75268	3.28935	2.84957	2.44154	2.07087	1.74057	1.45122	1.20155	0.988887		8.59571	6.42281	6.04103	5.62322	5.17576	4.70752	4.22925	3.75268	3.28935	2.84957
[S]11	0.107374	7.7667	5.80336	5.4584	5.08088	4.67658	4.2535	3.82136	3.39075	2.97211	2.57474	2.20606	1.87115	1.5727	1.31126	1.08567	0.893514						7.76672	5.80337	5.45841	5.08089	4.67659	4.25351	3.82137	3.39075	2.97211	2.57475	2.20607	1.87115	1.5727	1.31126	1.08567	0.893515		7.76672	5.80337	5.45841	5.08089	4.67659	4.25351	3.82137	3.39075	2.97211	2.57475
[S]12	0.0858993	6.93112	5.179	4.87116	4.53426	4.17345	3.79589	3.41024	3.02596	2.65235	2.29774	1.96872	1.66984	1.4035	1.17019	0.968866	0.797385						6.93114	5.17902	4.87117	4.53427	4.17346	3.79589	3.41024	3.02596	2.65236	2.29774	1.96873	1.66984	1.4035	1.17019	0.968867	0.797386		6.93114	5.17902	4.87117	4.53427	4.17346	3.79589	3.41024	3.02596	2.65236	2.29774
[S]13	0.0687195	6.1095	4.56508	4.29373	3.99677	3.67873	3.34592	3.00599	2.66726	2.33794	2.02537	1.73535	1.4719	1.23713	1.03147	0.854017	0.702863						6.10953	4.5651	4.29375	3.99678	3.67874	3.34593	3.006	2.66726	2.33795	2.02537	1.73535	1.4719	1.23713	1.03148	0.854017	0.702864		6.10953	4.5651	4.29375	3.99678	3.67874	3.34593	3.006	2.66726	2.33795	2.02537
[S]14	0.0549756	5.32106	3.97595	3.73961	3.48097	3.20398	2.91412	2.61806	2.32304	2.03623	1.76399	1.5114	1.28194	1.07747	0.89836	0.743804	0.612157						5.32109	3.97597	3.73963	3.48099	3.20399	2.91413	2.61807	2.32305	2.03623	1.76399	1.5114	1.28195	1.07747	0.898361	0.743804	0.612157		5.32109	3.97597	3.73963	3.48099	3.20399	2.91413	2.61807	2.32305	2.03623	1.76399
[S]15	0.0439805	4.58192	3.42366	3.22015	2.99744	2.75892	2.50933	2.25439	2.00035	1.75338	1.51896	1.30145	1.10387	0.927803	0.773571	0.640483	0.527124						4.58195	3.42368	3.22017	2.99745	2.75893	2.50934	2.2544	2.00036	1.75338	1.51896	1.30146	1.10387	0.927804	0.773572	0.640484	0.527124		4.58195	3.42368	3.22017	2.99745	2.75893	2.50934	2.2544	2.00036	1.75338	1.51896
	1	1	1	1	1	1	1	1	1	1	1	1	1	1	1	1	1																					1	1	13.6363	10.1892	9.58354	8.92073	8.21088	7.46806	6.70933	5.9533	5.21827	4.5206
	1	1	1	1	1	1	1	1	1	1	1	1	1	1	1	1	1					13.6364	13.6364	13.6363		-8.22485e-05	-8.22485e-05	4										0.8	0.8	13.3333	9.96277	9.37058	8.72249	8.02842	7.3021	6.56024	5.821	5.10231	4.42015
	1	1	1	1	1	1	1	1	1	1	1	1	1	1	1	1	1					13.3333	13.3333	13.3333		-7.45806e-05	-7.45806e-05	4										0.64	0.64	12.9729	9.69351	9.11732	8.48675	7.81143	7.10475	6.38294	5.66368	4.96441	4.30068
	1	1	1	1	1	1	1	1	1	1	1	1	1	1	1	1	1					12.973	12.973	12.9729		-6.58075e-05	-6.58075e-05	4										0.512	0.512	12.549	9.37673	8.81937	8.20941	7.55616	6.87257	6.17435	5.47859	4.80218	4.16014
	1	1	1	1	1	1	1	1	1	1	1	1	1	1	1	1	1					12.549	12.549	12.549		-5.59668e-05	-5.59668e-05	4										0.4096	0.4096	12.0565	9.00873	8.47325	7.88722	7.25961	6.60285	5.93203	5.26358	4.61371	3.99687
	1	1	1	1	1	1	1	1	1	1	1	1	1	1	1	1	1					12.0565	12.0565	12.0565		-4.51874e-05	-4.51874e-05	4										0.32768	0.32768	11.4927	8.58745	8.07701	7.51839	6.92013	6.29408	5.65462	5.01743	4.39796	3.80996
	1	1	1	1	1	1	1	1	1	1	1	1	1	1	1	1	1					11.4927	11.4927	11.4927		-3.37081e-05	-3.37081e-05	4										0.262144	0.262144	10.858	8.1132	7.63095	7.10318	6.53795	5.94648	5.34234	4.74034	4.15507	3.59955
	1	1	1	1	1	1	1	1	1	1	1	1	1	1	1	1	1					10.858	10.858	10.858		-2.1885e-05	-2.1885e-05	4										0.209715	0.209715	10.1568	7.58929	7.13818	6.64449	6.11576	5.56248	4.99736	4.43423	3.88676	3.36711
	1	1	1	1	1	1	1	1	1	1	1	1	1	1	1	1	1					10.1568	10.1568	10.1568		-1.01778e-05	-1.01778e-05	4										0.167772	0.167772	9.39822	7.02245	6.60503	6.14821	5.65898	5.14702	4.6241	4.10304	3.59645	3.11562
	1	1	1	1	1	1	1	1	1	1	1	1	1	1	1	1	1					9.39822	9.39822	9.39822		8.88e-07	8.88e-07	4										0.134218	0.134218	8.59571	6.42281	6.04103	5.62322	5.17576	4.70752	4.22925	3.75268	3.28935	2.84957
	1	1	1	1	1	1	1	1	1	1	1	1	1	1	1	1	1					8.5957	8.5957	8.59571		1.07833e-05	1.07833e-05	4										0.107374	0.107374	7.76672	5.80337	5.45841	5.08089	4.67659	4.25351	3.82137	3.39075	2.97211	2.57475
	1	1	1	1	1	1	1	1	1	1	1	1	1	1	1	1	1					7.7667	7.7667	7.76672		1.90502e-05	1.90502e-05	4										0.0858993	0.0858993	6.93114	5.17902	4.87117	4.53427	4.17346	3.79589	3.41024	3.02596	2.65236	2.29774
	1	1	1	1	1	1	1	1	1	1	1	1	1	1	1	1	1					6.93112	6.93112	6.93114		2.53721e-05	2.53721e-05	4										0.0687195	0.0687195	6.10953	4.5651	4.29375	3.99678	3.67874	3.34593	3.006	2.66726	2.33795	2.02537
	1	1	1	1	1	1	1	1	1	1	1	1	1	1	1	1	1					6.1095	6.1095	6.10953		2.96203e-05	2.96203e-05	4										0.0549756	0.0549756	5.32109	3.97597	3.73963	3.48099	3.20399	2.91413	2.61807	2.32305	2.03623	1.76399
	1	1	1	1	1	1	1	1	1	1	1	1	1	1	1	1	1					5.32106	5.32106	5.32109		3.1862e-05	3.1862e-05	4										0.0439805	0.0439805	4.58195	3.42368	3.22017	2.99745	2.75893	2.50934	2.2544	2.00036	1.75338	1.51896
																						4.58192	4.58192	4.58195		3.23315e-05	3.23315e-05	4
																						10.1892	10.1892	10.1892		-3.68378e-05	-3.68378e-05	4											1	0.0733338	0.0981432	0.104346	0.112098	0.12179	0.133904	0.149046	0.167974	0.191634	0.221209
																						9.9628	9.9628	9.96277		-3.30952e-05	-3.30952e-05	4											1.25	0.0750004	0.100374	0.106717	0.114646	0.124558	0.136947	0.152433	0.171792	0.19599	0.226237
																						9.69354	9.69354	9.69351		-2.88176e-05	-2.88176e-05	4											1.5625	0.0770837	0.103162	0.109681	0.117831	0.128017	0.140751	0.156668	0.176564	0.201434	0.232521
																						9.37676	9.37676	9.37673		-2.40257e-05	-2.40257e-05	4											1.95312	0.0796879	0.106647	0.113387	0.121811	0.132342	0.145506	0.16196	0.182529	0.208239	0.240377
																						9.00875	9.00875	9.00873		-1.87856e-05	-1.87856e-05	4											2.44141	0.082943	0.111003	0.118018	0.126787	0.137748	0.15145	0.168576	0.189985	0.216745	0.250196
																						8.58747	8.58747	8.58745		-1.32178e-05	-1.32178e-05	4											3.05176	0.087012	0.116449	0.123808	0.133007	0.144506	0.15888	0.176846	0.199305	0.227378	0.26247
																						8.11321	8.11321	8.1132		-7.50049e-06	-7.50049e-06	4											3.8147	0.0920982	0.123256	0.131045	0.140782	0.152953	0.168167	0.187184	0.210955	0.24067	0.277813
																						7.5893	7.5893	7.58929		-1.86234e-06	-1.86234e-06	4											4.76837	0.0984559	0.131765	0.140092	0.150501	0.163512	0.179776	0.200106	0.225518	0.257284	0.296991
																						7.02245	7.02245	7.02245		3.43641e-06	3.43641e-06	4											5.96046	0.106403	0.1424	0.1514	0.162649	0.17671	0.194287	0.216258	0.243722	0.278052	0.320964
																						6.4228	6.4228	6.42281		8.13515e-06	8.13515e-06	4											7.45058	0.116337	0.155695	0.165535	0.177834	0.193208	0.212426	0.236449	0.266476	0.304011	0.35093
																						5.80336	5.80336	5.80337		1.20101e-05	1.20101e-05	4											9.31323	0.128755	0.172314	0.183203	0.196816	0.213831	0.2351	0.261687	0.29492	0.336461	0.388387
																						5.179	5.179	5.17902		1.49093e-05	1.49093e-05	4											11.6415	0.144276	0.193087	0.205289	0.220543	0.239609	0.263443	0.293234	0.330474	0.377023	0.435209
																						4.56508	4.56508	4.5651		1.67746e-05	1.67746e-05	4											14.5519	0.163679	0.219053	0.232897	0.250201	0.271832	0.298871	0.332668	0.374916	0.427725	0.493737
																						3.97595	3.97595	3.97597		1.7646e-05	1.7646e-05	4											18.1899	0.187932	0.251511	0.267406	0.287275	0.312111	0.343155	0.381961	0.430469	0.491103	0.566896
																						3.42366	3.42366	3.42368		1.76458e-05	1.76458e-05	4											22.7374	0.218248	0.292084	0.310543	0.333617	0.362459	0.398512	0.443578	0.49991	0.570326	0.658345
																						9.58357	9.58357	9.58354		-3.05797e-05	-3.05797e-05	4
																						9.37061	9.37061	9.37058		-2.73879e-05	-2.73879e-05	4												13.6364	10.1892	9.58357	8.92075	8.2109	7.46807	6.70934	5.9533	5.21827	4.5206
																						9.11735	9.11735	9.11732		-2.3741e-05	-2.3741e-05	4												13.3333	9.9628	9.37061	8.72251	8.02843	7.30211	6.56025	5.82101	5.10231	4.42014
																						8.81939	8.81939	8.81937		-1.96571e-05	-1.96571e-05	4												12.973	9.69354	9.11735	8.48677	7.81145	7.10476	6.38294	5.66368	4.96441	4.30068
																						8.47326	8.47326	8.47325		-1.51936e-05	-1.51936e-05	4												12.549	9.37676	8.81939	8.20942	7.55617	6.87258	6.17435	5.47859	4.80218	4.16014
																						8.07702	8.07702	8.07701		-1.04542e-05	-1.04542e-05	4												12.0565	9.00875	8.47326	7.88723	7.25962	6.60285	5.93203	5.26358	4.61371	3.99687
																						7.63095	7.63095	7.63095		-5.59178e-06	-5.59178e-06	4												11.4927	8.58747	8.07702	7.5184	6.92013	6.29408	5.65462	5.01743	4.39795	3.80996
																						7.13818	7.13818	7.13818		-8.02642e-07	-8.02642e-07	4												10.858	8.11321	7.63095	7.10318	6.53795	5.94648	5.34234	4.74034	4.15507	3.59955
																						6.60503	6.60503	6.60503		3.69038e-06	3.69038e-06	4												10.1568	7.5893	7.13818	6.64449	6.11576	5.56248	4.99735	4.43423	3.88675	3.3671
																						6.04102	6.04102	6.04103		7.66444e-06	7.66444e-06	4												9.39822	7.02245	6.60503	6.14821	5.65897	5.14702	4.6241	4.10303	3.59645	3.11561
																						5.4584	5.4584	5.45841		1.09287e-05	1.09287e-05	4												8.5957	6.4228	6.04102	5.62321	5.17575	4.70751	4.22924	3.75267	3.28935	2.84957
																						4.87116	4.87116	4.87117		1.3354e-05	1.3354e-05	4												7.7667	5.80336	5.4584	5.08088	4.67658	4.2535	3.82136	3.39075	2.97211	2.57474
																						4.29373	4.29373	4.29375		1.48921e-05	1.48921e-05	4												6.93112	5.179	4.87116	4.53426	4.17345	3.79589	3.41024	3.02596	2.65235	2.29774
																						3.73961	3.73961	3.73963		1.55789e-05	1.55789e-05	4												6.1095	4.56508	4.29373	3.99677	3.67873	3.34592	3.00599	2.66726	2.33794	2.02537
																						3.22015	3.22015	3.22017		1.55206e-05	1.55206e-05	4												5.32106	3.97595	3.73961	3.48097	3.20398	2.91412	2.61806	2.32304	2.03623	1.76399
																						8.92075	8.92075	8.92073		-2.43202e-05	-2.43202e-05	4												4.58192	3.42366	3.22015	2.99744	2.75892	2.50933	2.25439	2.00035	1.75338	1.51896
																						8.72251	8.72251	8.72249		-2.16837e-05	-2.16837e-05	4
																						8.48677	8.48677	8.48675		-1.86724e-05	-1.86724e-05	4												1/s	0	0.0439805	0.0549756	0.0687195	0.0858993	0.107374	0.134218	0.167772	0.209715
																						8.20942	8.20942	8.20941		-1.53022e-05	-1.53022e-05	4											1	1	0.0733338	0.0981432	0.104346	0.112098	0.12179	0.133904	0.149046	0.167974	0.191634
																						7.88723	7.88723	7.88722		-1.16212e-05	-1.16212e-05	4											2	1.25	0.0750004	0.100374	0.106717	0.114646	0.124558	0.136947	0.152433	0.171792	0.19599
																						7.5184	7.5184	7.51839		-7.71618e-06	-7.71618e-06	4											3	1.5625	0.0770837	0.103162	0.109681	0.117831	0.128017	0.140751	0.156668	0.176564	0.201434
																						7.10318	7.10318	7.10318		-3.71481e-06	-3.71481e-06	4											4	1.95312	0.0796879	0.106647	0.113387	0.121811	0.132342	0.145506	0.16196	0.182529	0.208239
																						6.64449	6.64449	6.64449		2.19615e-07	2.19615e-07	4											5	2.44141	0.082943	0.111003	0.118018	0.126787	0.137748	0.15145	0.168576	0.189985	0.216745
																						6.14821	6.14821	6.14821		3.90195e-06	3.90195e-06	4											6	3.05176	0.087012	0.116449	0.123808	0.133007	0.144506	0.15888	0.176846	0.199305	0.227378
																						5.62321	5.62321	5.62322		7.14744e-06	7.14744e-06	4											7	3.8147	0.0920982	0.123256	0.131045	0.140782	0.152953	0.168167	0.187184	0.210955	0.24067
																						5.08088	5.08088	5.08089		9.79836e-06	9.79836e-06	4											8	4.76837	0.0984559	0.131765	0.140092	0.150501	0.163512	0.179776	0.200106	0.225518	0.257284
																						4.53426	4.53426	4.53427		1.17487e-05	1.17487e-05	4											9	5.96046	0.106403	0.1424	0.1514	0.162649	0.17671	0.194287	0.216258	0.243722	0.278052
																						3.99677	3.99677	3.99678		1.29602e-05	1.29602e-05	4											10	7.45058	0.116337	0.155695	0.165535	0.177834	0.193208	0.212426	0.236449	0.266476	0.304011
																						3.48097	3.48097	3.48099		1.34641e-05	1.34641e-05	4											11	9.31323	0.128755	0.172314	0.183203	0.196816	0.213831	0.2351	0.261687	0.29492	0.336461
																						2.99744	2.99744	2.99745		1.33508e-05	1.33508e-05	4											12	11.6415	0.144276	0.193087	0.205289	0.220543	0.239609	0.263443	0.293234	0.330474	0.377023
																						8.2109	8.2109	8.21088		-1.82996e-05	-1.82996e-05	4											13	14.5519	0.163679	0.219053	0.232897	0.250201	0.271832	0.298871	0.332668	0.374916	0.427725
																						8.02843	8.02843	8.02842		-1.62026e-05	-1.62026e-05	4											14	18.1899	0.187932	0.251511	0.267406	0.287275	0.312111	0.343155	0.381961	0.430469	0.491103
																						7.81145	7.81145	7.81143		-1.38089e-05	-1.38089e-05	4											15	22.7374	0.218248	0.292084	0.310543	0.333617	0.362459	0.398512	0.443578	0.49991	0.570326
																						7.55617	7.55617	7.55616		-1.11318e-05	-1.11318e-05	4
																						7.25962	7.25962	7.25961		-8.21077e-06	-8.21077e-06	4
																						6.92013	6.92013	6.92013		-5.11595e-06	-5.11595e-06	4
																						6.53795	6.53795	6.53795		-1.95023e-06	-1.95023e-06	4
																						6.11576	6.11576	6.11576		1.1551e-06	1.1551e-06	4
																						5.65897	5.65897	5.65898		4.0516e-06	4.0516e-06	4
																						5.17575	5.17575	5.17576		6.59159e-06	6.59159e-06	4
																						4.67658	4.67658	4.67659		8.64955e-06	8.64955e-06	4
																						4.17345	4.17345	4.17346		1.01419e-05	1.01419e-05	4
																						3.67873	3.67873	3.67874		1.10398e-05	1.10398e-05	4
																						3.20398	3.20398	3.20399		1.13702e-05	1.13702e-05	4
																						2.75892	2.75892	2.75893		1.12077e-05	1.12077e-05	4
																						7.46807	7.46807	7.46806		-1.27557e-05	-1.27557e-05	4
																						7.30211	7.30211	7.3021		-1.11622e-05	-1.11622e-05	4
																						7.10476	7.10476	7.10475		-9.34478e-06	-9.34478e-06	4
																						6.87258	6.87258	6.87257		-7.31445e-06	-7.31445e-06	4
																						6.60285	6.60285	6.60285		-5.10216e-06	-5.10216e-06	4
																						6.29408	6.29408	6.29408		-2.76268e-06	-2.76268e-06	4
																						5.94648	5.94648	5.94648		-3.75661e-07	-3.75661e-07	4
																						5.56248	5.56248	5.56248		1.9576e-06	1.9576e-06	4
																						5.14702	5.14702	5.14702		4.12302e-06	4.12302e-06	4
																						4.70751	4.70751	4.70752		6.00754e-06	6.00754e-06	4
																						4.2535	4.2535	4.25351		7.51573e-06	7.51573e-06	4
																						3.79589	3.79589	3.79589		8.58492e-06	8.58492e-06	4
																						3.34592	3.34592	3.34593		9.19478e-06	9.19478e-06	4
																						2.91412	2.91412	2.91413		9.36843e-06	9.36843e-06	4
																						2.50933	2.50933	2.50934		9.16513e-06	9.16513e-06	4
																						6.70934	6.70934	6.70933		-7.89159e-06	-7.89159e-06	4
																						6.56025	6.56025	6.56024		-6.748e-06	-6.748e-06	4
																						6.38294	6.38294	6.38294		-5.44534e-06	-5.44534e-06	4
																						6.17435	6.17435	6.17435		-3.99248e-06	-3.99248e-06	4
																						5.93203	5.93203	5.93203		-2.41286e-06	-2.41286e-06	4
																						5.65462	5.65462	5.65462		-7.47257e-07	-7.47257e-07	4
																						5.34234	5.34234	5.34234		9.45488e-07	9.45488e-07	4
																						4.99735	4.99735	4.99736		2.59102e-06	2.59102e-06	4
																						4.6241	4.6241	4.6241		4.10602e-06	4.10602e-06	4
																						4.22924	4.22924	4.22925		5.40847e-06	5.40847e-06	4
																						3.82136	3.82136	3.82137		6.42978e-06	6.42978e-06	4
																						3.41024	3.41024	3.41024		7.12589e-06	7.12589e-06	4
																						3.00599	3.00599	3.006		7.48408e-06	7.48408e-06	4
																						2.61806	2.61806	2.61807		7.52361e-06	7.52361e-06	4
																						2.25439	2.25439	2.2544		7.29009e-06	7.29009e-06	4
																						5.9533	5.9533	5.9533		-3.84747e-06	-3.84747e-06	4
																						5.82101	5.82101	5.821		-3.08737e-06	-3.08737e-06	4
																						5.66368	5.66368	5.66368		-2.22338e-06	-2.22338e-06	4
																						5.47859	5.47859	5.47859		-1.26243e-06	-1.26243e-06	4
																						5.26358	5.26358	5.26358		-2.21474e-07	-2.21474e-07	4
																						5.01743	5.01743	5.01743		8.70761e-07	8.70761e-07	4
																						4.74034	4.74034	4.74034		1.97333e-06	1.97333e-06	4
																						4.43423	4.43423	4.43423		3.03495e-06	3.03495e-06	4
																						4.10303	4.10303	4.10304		3.99867e-06	3.99867e-06	4
																						3.75267	3.75267	3.75268		4.80898e-06	4.80898e-06	4
																						3.39075	3.39075	3.39075		5.4202e-06	5.4202e-06	4
																						3.02596	3.02596	3.02596		5.80405e-06	5.80405e-06	4
																						2.66726	2.66726	2.66726		5.95414e-06	5.95414e-06	4
																						2.32304	2.32304	2.32305		5.88622e-06	5.88622e-06	4
																						2.00035	2.00035	2.00036		5.63404e-06	5.63404e-06	4
																						5.21827	5.21827	5.21827		-6.83962e-07	-6.83962e-07	4
																						5.10231	5.10231	5.10231		-2.34691e-07	-2.34691e-07	4
																						4.96441	4.96441	4.96441		2.73895e-07	2.73895e-07	4
																						4.80218	4.80218	4.80218		8.36509e-07	8.36509e-07	4
																						4.61371	4.61371	4.61371		1.4416e-06	1.4416e-06	4
																						4.39795	4.39795	4.39796		2.07032e-06	2.07032e-06	4
																						4.15507	4.15507	4.15507		2.69637e-06	2.69637e-06	4
																						3.88675	3.88675	3.88676		3.28735e-06	3.28735e-06	4
																						3.59645	3.59645	3.59645		3.80777e-06	3.80777e-06	4
																						3.28935	3.28935	3.28935		4.22372e-06	4.22372e-06	4
																						2.97211	2.97211	2.97211		4.50809e-06	4.50809e-06	4
																						2.65235	2.65235	2.65236		4.64529e-06	4.64529e-06	4
																						2.33794	2.33794	2.33795		4.63392e-06	4.63392e-06	4
																						2.03623	2.03623	2.03623		4.48662e-06	4.48662e-06	4
																						1.75338	1.75338	1.75338		4.22723e-06	4.22723e-06	4
																						4.5206	4.5206	4.5206		1.61816e-06	1.61816e-06	4
																						4.42014	4.42014	4.42015		1.82894e-06	1.82894e-06	4
																						4.30068	4.30068	4.30068		2.065e-06	2.065e-06	4
																						4.16014	4.16014	4.16014		2.32242e-06	2.32242e-06	4
																						3.99687	3.99687	3.99687		2.59389e-06	2.59389e-06	4
																						3.80996	3.80996	3.80996		2.8683e-06	2.8683e-06	4
																						3.59955	3.59955	3.59955		3.13076e-06	3.13076e-06	4
																						3.3671	3.3671	3.36711		3.36349e-06	3.36349e-06	4
																						3.11561	3.11561	3.11562		3.54767e-06	3.54767e-06	4
																						2.84957	2.84957	2.84957		3.666e-06	3.666e-06	4
																						2.57474	2.57474	2.57475		3.70564e-06	3.70564e-06	4
																						2.29774	2.29774	2.29774		3.66065e-06	3.66065e-06	4
																						2.02537	2.02537	2.02537		3.53326e-06	3.53326e-06	4
																						1.76399	1.76399	1.76399		3.33349e-06	3.33349e-06	4
																						1.51896	1.51896	1.51896		3.07726e-06	3.07726e-06	4
																						3.87329	3.87329	3.87329		3.14385e-06	3.14385e-06	4
																						3.78722	3.78722	3.78722		3.18262e-06	3.18262e-06	4
																						3.68486	3.68486	3.68486		3.22229e-06	3.22229e-06	4
																						3.56444	3.56444	3.56444		3.26002e-06	3.26002e-06	4
																						3.42455	3.42455	3.42455		3.29171e-06	3.29171e-06	4
																						3.2644	3.2644	3.26441		3.31199e-06	3.31199e-06	4
																						3.08412	3.08412	3.08412		3.31436e-06	3.31436e-06	4
																						2.88496	2.88496	2.88497		3.2918e-06	3.2918e-06	4
																						2.66948	2.66948	2.66949		3.23761e-06	3.23761e-06	4
																						2.44153	2.44153	2.44154		3.14661e-06	3.14661e-06	4
																						2.20606	2.20606	2.20607		3.01624e-06	3.01624e-06	4
																						1.96872	1.96872	1.96873		2.84744e-06	2.84744e-06	4
																						1.73535	1.73535	1.73535		2.64486e-06	2.64486e-06	4
																						1.5114	1.5114	1.5114		2.41633e-06	2.41633e-06	4
																						1.30145	1.30145	1.30146		2.17173e-06	2.17173e-06	4
																						3.28526	3.28526	3.28527		4.02065e-06	4.02065e-06	4
																						3.21226	3.21226	3.21226		3.94424e-06	3.94424e-06	4
																						3.12544	3.12544	3.12544		3.85261e-06	3.85261e-06	4
																						3.0233	3.0233	3.0233		3.74375e-06	3.74375e-06	4
																						2.90465	2.90465	2.90465		3.61584e-06	3.61584e-06	4
																						2.76881	2.76881	2.76882		3.4675e-06	3.4675e-06	4
																						2.6159	2.6159	2.6159		3.29807e-06	3.29807e-06	4
																						2.44698	2.44698	2.44698		3.1079e-06	3.1079e-06	4
																						2.26421	2.26421	2.26422		2.8986e-06	2.8986e-06	4
																						2.07087	2.07087	2.07087		2.67318e-06	2.67318e-06	4
																						1.87115	1.87115	1.87115		2.43599e-06	2.43599e-06	4
																						1.66984	1.66984	1.66984		2.19246e-06	2.19246e-06	4
																						1.4719	1.4719	1.4719		1.94864e-06	1.94864e-06	4
																						1.28194	1.28194	1.28195		1.7106e-06	1.7106e-06	4
																						1.10387	1.10387	1.10387		1.48383e-06	1.48383e-06	4
																						2.76126	2.76126	2.76126		4.39354e-06	4.39354e-06	4
																						2.6999	2.6999	2.6999		4.24747e-06	4.24747e-06	4
																						2.62693	2.62693	2.62693		4.07662e-06	4.07662e-06	4
																						2.54108	2.54108	2.54108		3.87961e-06	3.87961e-06	4
																						2.44135	2.44135	2.44135		3.65616e-06	3.65616e-06	4
																						2.32718	2.32718	2.32719		3.4075e-06	3.4075e-06	4
																						2.19866	2.19866	2.19866		3.13669e-06	3.13669e-06	4
																						2.05668	2.05668	2.05668		2.84875e-06	2.84875e-06	4
																						1.90307	1.90307	1.90307		2.5505e-06	2.5505e-06	4
																						1.74056	1.74056	1.74057		2.25001e-06	2.25001e-06	4
																						1.5727	1.5727	1.5727		1.95581e-06	1.95581e-06	4
																						1.4035	1.4035	1.4035		1.67596e-06	1.67596e-06	4
																						1.23713	1.23713	1.23713		1.41711e-06	1.41711e-06	4
																						1.07747	1.07747	1.07747		1.18393e-06	1.18393e-06	4
																						0.927803	0.927803	0.927804		9.78869e-07	9.78869e-07	4
																						2.30224	2.30224	2.30225		4.40391e-06	4.40391e-06	4
																						2.25108	2.25108	2.25109		4.22233e-06	4.22233e-06	4
																						2.19024	2.19024	2.19025		4.01136e-06	4.01136e-06	4
																						2.11867	2.11867	2.11867		3.77004e-06	3.77004e-06	4
																						2.03552	2.03552	2.03552		3.49906e-06	3.49906e-06	4
																						1.94033	1.94033	1.94033		3.20118e-06	3.20118e-06	4
																						1.83317	1.83317	1.83317		2.8816e-06	2.8816e-06	4
																						1.71479	1.71479	1.71479		2.54797e-06	2.54797e-06	4
																						1.58671	1.58671	1.58672		2.20995e-06	2.20995e-06	4
																						1.45122	1.45122	1.45122		1.87832e-06	1.87832e-06	4
																						1.31126	1.31126	1.31126		1.56377e-06	1.56377e-06	4
																						1.17019	1.17019	1.17019		1.27554e-06	1.27554e-06	4
																						1.03147	1.03147	1.03148		1.02034e-06	1.02034e-06	4
																						0.89836	0.89836	0.898361		8.01737e-07	8.01737e-07	4
																						0.773571	0.773571	0.773572		6.20203e-07	6.20203e-07	4
																						1.90616	1.90616	1.90616		4.17546e-06	4.17546e-06	4
																						1.8638	1.8638	1.8638		3.98241e-06	3.98241e-06	4
																						1.81343	1.81343	1.81343		3.75877e-06	3.75877e-06	4
																						1.75416	1.75416	1.75417		3.50391e-06	3.50391e-06	4
																						1.68532	1.68532	1.68532		3.21905e-06	3.21905e-06	4
																						1.60651	1.60651	1.60651		2.90772e-06	2.90772e-06	4
																						1.51779	1.51779	1.51779		2.57613e-06	2.57613e-06	4
																						1.41977	1.41977	1.41978		2.23305e-06	2.23305e-06	4
																						1.31373	1.31373	1.31373		1.88935e-06	1.88935e-06	4
																						1.20155	1.20155	1.20155		1.55684e-06	1.55684e-06	4
																						1.08567	1.08567	1.08567		1.24692e-06	1.24692e-06	4
																						0.968866	0.968866	0.968867		9.69055e-07	9.69055e-07	4
																						0.854017	0.854017	0.854017		7.29623e-07	7.29623e-07	4
																						0.743804	0.743804	0.743804		5.31357e-07	5.31357e-07	4
																						0.640483	0.640483	0.640484		3.73509e-07	3.73509e-07	4
																						1.56879	1.56879	1.56879		3.80742e-06	3.80742e-06	4
																						1.53392	1.53392	1.53393		3.6186e-06	3.6186e-06	4
																						1.49247	1.49247	1.49247		3.40022e-06	3.40022e-06	4
																						1.44369	1.44369	1.4437		3.15188e-06	3.15188e-06	4
																						1.38703	1.38703	1.38704		2.87502e-06	2.87502e-06	4
																						1.32217	1.32217	1.32217		2.57344e-06	2.57344e-06	4
																						1.24915	1.24915	1.24915		2.25357e-06	2.25357e-06	4
																						1.16849	1.16849	1.16849		1.92436e-06	1.92436e-06	4
																						1.08121	1.08121	1.08121		1.59673e-06	1.59673e-06	4
																						0.988886	0.988886	0.988887		1.28246e-06	1.28246e-06	4
																						0.893514	0.893514	0.893515		9.92708e-07	9.92708e-07	4
																						0.797385	0.797385	0.797386		7.36528e-07	7.36528e-07	4
																						0.702863	0.702863	0.702864		5.1975e-07	5.1975e-07	4
																						0.612157	0.612157	0.612157		3.44465e-07	3.44465e-07	4
																						0.527124	0.527124	0.527124		2.09265e-07	2.09265e-07	4
[truncated: 54 more columns]

## Sheet: Modifier equation
																							Calculated values
		No Inhibitor	[I]1	[I]2	[I]3	[I]4	[I]5	[I]6	[I]7	[I]8	[I]9	[I]10	[I]11	[I]12	[I]13	[I]14	[I]15					Ki	No Inhibitor	[I]1	[I]2	[I]3	[I]4	[I]5	[I]6	[I]7	[I]8	[I]9	[I]10	[I]11	[I]12	[I]13	[I]14	[I]15
		0	0.0439805	0.0549756	0.0687195	0.0858993	0.107374	0.134218	0.167772	0.209715	0.262144	0.32768	0.4096	0.512	0.64	0.8	1	K1	0.1	V1	15	0.13	0	0.0439805	0.0549756	0.0687195	0.0858993	0.107374	0.134218	0.167772	0.209715	0.262144	0.32768	0.4096	0.512	0.64	0.8	1
[S]1	1	13.6364	10.1892	9.58357	8.92075	8.2109	7.46807	6.70934	5.9533	5.21827	4.5206	3.87329	3.28526	2.76126	2.30224	1.90616	1.56879	K2	0.1	V2	0		13.6364	10.1892	9.58357	8.92075	8.2109	7.46807	6.70934	5.9533	5.21827	4.5206	3.87329	3.28526	2.76126	2.30224	1.90616	1.56879		13.6364	10.1892	9.58357	8.92075	8.2109	7.46807	6.70934	5.9533	5.21827	4.5206
[S]2	0.8	13.3333	9.9628	9.37061	8.72251	8.02843	7.30211	6.56025	5.82101	5.10231	4.42014	3.78722	3.21226	2.6999	2.25108	1.8638	1.53392						13.3333	9.9628	9.37061	8.72251	8.02843	7.30211	6.56025	5.82101	5.10231	4.42014	3.78722	3.21226	2.6999	2.25108	1.8638	1.53392		13.3333	9.9628	9.37061	8.72251	8.02843	7.30211	6.56025	5.82101	5.10231	4.42014
[S]3	0.64	12.973	9.69354	9.11735	8.48677	7.81145	7.10476	6.38294	5.66368	4.96441	4.30068	3.68486	3.12544	2.62693	2.19024	1.81343	1.49247						12.973	9.69354	9.11735	8.48677	7.81145	7.10476	6.38294	5.66368	4.96441	4.30068	3.68486	3.12544	2.62693	2.19024	1.81343	1.49247		12.973	9.69354	9.11735	8.48677	7.81145	7.10476	6.38294	5.66368	4.96441	4.30068
[S]4	0.512	12.549	9.37676	8.81939	8.20942	7.55617	6.87258	6.17435	5.47859	4.80218	4.16014	3.56444	3.0233	2.54108	2.11867	1.75416	1.44369						12.549	9.37676	8.81939	8.20942	7.55617	6.87258	6.17435	5.47859	4.80218	4.16014	3.56444	3.0233	2.54108	2.11867	1.75416	1.44369		12.549	9.37676	8.81939	8.20942	7.55617	6.87258	6.17435	5.47859	4.80218	4.16014
[S]5	0.4096	12.0565	9.00875	8.47326	7.88723	7.25962	6.60285	5.93203	5.26358	4.61371	3.99687	3.42455	2.90465	2.44135	2.03552	1.68532	1.38703						12.0565	9.00875	8.47326	7.88723	7.25962	6.60285	5.93203	5.26358	4.61371	3.99687	3.42455	2.90465	2.44135	2.03552	1.68532	1.38703		12.0565	9.00875	8.47326	7.88723	7.25962	6.60285	5.93203	5.26358	4.61371	3.99687
[S]6	0.32768	11.4927	8.58747	8.07702	7.5184	6.92013	6.29408	5.65462	5.01743	4.39795	3.80996	3.2644	2.76881	2.32718	1.94033	1.60651	1.32217			Sum R2	2.07532e-28		11.4927	8.58747	8.07702	7.5184	6.92013	6.29408	5.65462	5.01743	4.39795	3.80996	3.2644	2.76881	2.32718	1.94033	1.60651	1.32217		11.4927	8.58747	8.07702	7.5184	6.92013	6.29408	5.65462	5.01743	4.39795	3.80996
[S]7	0.262144	10.858	8.11321	7.63095	7.10318	6.53795	5.94648	5.34234	4.74034	4.15507	3.59955	3.08412	2.6159	2.19866	1.83317	1.51779	1.24915			Sum residuals %	4.49181e-14		10.858	8.11321	7.63095	7.10318	6.53795	5.94648	5.34234	4.74034	4.15507	3.59955	3.08412	2.6159	2.19866	1.83317	1.51779	1.24915		10.858	8.11321	7.63095	7.10318	6.53795	5.94648	5.34234	4.74034	4.15507	3.59955
[S]8	0.209715	10.1568	7.5893	7.13818	6.64449	6.11576	5.56248	4.99735	4.43423	3.88675	3.3671	2.88496	2.44698	2.05668	1.71479	1.41977	1.16849						10.1568	7.5893	7.13818	6.64449	6.11576	5.56248	4.99735	4.43423	3.88675	3.3671	2.88496	2.44698	2.05668	1.71479	1.41977	1.16849		10.1568	7.5893	7.13818	6.64449	6.11576	5.56248	4.99735	4.43423	3.88675	3.3671
[S]9	0.167772	9.39822	7.02245	6.60503	6.14821	5.65897	5.14702	4.6241	4.10303	3.59645	3.11561	2.66948	2.26421	1.90307	1.58671	1.31373	1.08121						9.39822	7.02245	6.60503	6.14821	5.65897	5.14702	4.6241	4.10303	3.59645	3.11561	2.66948	2.26421	1.90307	1.58671	1.31373	1.08121		9.39822	7.02245	6.60503	6.14821	5.65897	5.14702	4.6241	4.10303	3.59645	3.11561
[S]10	0.134218	8.5957	6.4228	6.04102	5.62321	5.17575	4.70751	4.22924	3.75267	3.28935	2.84957	2.44153	2.07087	1.74056	1.45122	1.20155	0.988886						8.5957	6.4228	6.04102	5.62321	5.17575	4.70751	4.22924	3.75267	3.28935	2.84957	2.44153	2.07087	1.74056	1.45122	1.20155	0.988886		8.5957	6.4228	6.04102	5.62321	5.17575	4.70751	4.22924	3.75267	3.28935	2.84957
[S]11	0.107374	7.7667	5.80336	5.4584	5.08088	4.67658	4.2535	3.82136	3.39075	2.97211	2.57474	2.20606	1.87115	1.5727	1.31126	1.08567	0.893514						7.7667	5.80336	5.4584	5.08088	4.67658	4.2535	3.82136	3.39075	2.97211	2.57474	2.20606	1.87115	1.5727	1.31126	1.08567	0.893514		7.7667	5.80336	5.4584	5.08088	4.67658	4.2535	3.82136	3.39075	2.97211	2.57474
[S]12	0.0858993	6.93112	5.179	4.87116	4.53426	4.17345	3.79589	3.41024	3.02596	2.65235	2.29774	1.96872	1.66984	1.4035	1.17019	0.968866	0.797385						6.93112	5.179	4.87116	4.53426	4.17345	3.79589	3.41024	3.02596	2.65235	2.29774	1.96872	1.66984	1.4035	1.17019	0.968866	0.797385		6.93112	5.179	4.87116	4.53426	4.17345	3.79589	3.41024	3.02596	2.65235	2.29774
[S]13	0.0687195	6.1095	4.56508	4.29373	3.99677	3.67873	3.34592	3.00599	2.66726	2.33794	2.02537	1.73535	1.4719	1.23713	1.03147	0.854017	0.702863						6.1095	4.56508	4.29373	3.99677	3.67873	3.34592	3.00599	2.66726	2.33794	2.02537	1.73535	1.4719	1.23713	1.03147	0.854017	0.702863		6.1095	4.56508	4.29373	3.99677	3.67873	3.34592	3.00599	2.66726	2.33794	2.02537
[S]14	0.0549756	5.32106	3.97595	3.73961	3.48097	3.20398	2.91412	2.61806	2.32304	2.03623	1.76399	1.5114	1.28194	1.07747	0.89836	0.743804	0.612157						5.32106	3.97595	3.73961	3.48097	3.20398	2.91412	2.61806	2.32304	2.03623	1.76399	1.5114	1.28194	1.07747	0.89836	0.743804	0.612157		5.32106	3.97595	3.73961	3.48097	3.20398	2.91412	2.61806	2.32304	2.03623	1.76399
[S]15	0.0439805	4.58192	3.42366	3.22015	2.99744	2.75892	2.50933	2.25439	2.00035	1.75338	1.51896	1.30145	1.10387	0.927803	0.773571	0.640483	0.527124						4.58192	3.42366	3.22015	2.99744	2.75892	2.50933	2.25439	2.00035	1.75338	1.51896	1.30145	1.10387	0.927803	0.773571	0.640483	0.527124		4.58192	3.42366	3.22015	2.99744	2.75892	2.50933	2.25439	2.00035	1.75338	1.51896
	1	1	1	1	1	1	1	1	1	1	1	1	1	1	1	1	1																					1	1	13.6364	10.1892	9.58357	8.92075	8.2109	7.46807	6.70934	5.9533	5.21827	4.5206
	1	1	1	1	1	1	1	1	1	1	1	1	1	1	1	1	1					13.6364	13.6364	13.6364		0	0	5										0.8	0.8	13.3333	9.9628	9.37061	8.72251	8.02843	7.30211	6.56025	5.82101	5.10231	4.42014
	1	1	1	1	1	1	1	1	1	1	1	1	1	1	1	1	1					13.3333	13.3333	13.3333		0	0	5										0.64	0.64	12.973	9.69354	9.11735	8.48677	7.81145	7.10476	6.38294	5.66368	4.96441	4.30068
	1	1	1	1	1	1	1	1	1	1	1	1	1	1	1	1	1					12.973	12.973	12.973		0	0	5										0.512	0.512	12.549	9.37676	8.81939	8.20942	7.55617	6.87258	6.17435	5.47859	4.80218	4.16014
	1	1	1	1	1	1	1	1	1	1	1	1	1	1	1	1	1					12.549	12.549	12.549		0	0	5										0.4096	0.4096	12.0565	9.00875	8.47326	7.88723	7.25962	6.60285	5.93203	5.26358	4.61371	3.99687
	1	1	1	1	1	1	1	1	1	1	1	1	1	1	1	1	1					12.0565	12.0565	12.0565		0	0	5										0.32768	0.32768	11.4927	8.58747	8.07702	7.5184	6.92013	6.29408	5.65462	5.01743	4.39795	3.80996
	1	1	1	1	1	1	1	1	1	1	1	1	1	1	1	1	1					11.4927	11.4927	11.4927		0	0	5										0.262144	0.262144	10.858	8.11321	7.63095	7.10318	6.53795	5.94648	5.34234	4.74034	4.15507	3.59955
	1	1	1	1	1	1	1	1	1	1	1	1	1	1	1	1	1					10.858	10.858	10.858		0	0	5										0.209715	0.209715	10.1568	7.5893	7.13818	6.64449	6.11576	5.56248	4.99735	4.43423	3.88675	3.3671
	1	1	1	1	1	1	1	1	1	1	1	1	1	1	1	1	1					10.1568	10.1568	10.1568		0	0	5										0.167772	0.167772	9.39822	7.02245	6.60503	6.14821	5.65897	5.14702	4.6241	4.10303	3.59645	3.11561
	1	1	1	1	1	1	1	1	1	1	1	1	1	1	1	1	1					9.39822	9.39822	9.39822		0	0	5										0.134218	0.134218	8.5957	6.4228	6.04102	5.62321	5.17575	4.70751	4.22924	3.75267	3.28935	2.84957
	1	1	1	1	1	1	1	1	1	1	1	1	1	1	1	1	1					8.5957	8.5957	8.5957		0	0	5										0.107374	0.107374	7.7667	5.80336	5.4584	5.08088	4.67658	4.2535	3.82136	3.39075	2.97211	2.57474
	1	1	1	1	1	1	1	1	1	1	1	1	1	1	1	1	1					7.7667	7.7667	7.7667		0	0	5										0.0858993	0.0858993	6.93112	5.179	4.87116	4.53426	4.17345	3.79589	3.41024	3.02596	2.65235	2.29774
	1	1	1	1	1	1	1	1	1	1	1	1	1	1	1	1	1					6.93112	6.93112	6.93112		0	0	5										0.0687195	0.0687195	6.1095	4.56508	4.29373	3.99677	3.67873	3.34592	3.00599	2.66726	2.33794	2.02537
	1	1	1	1	1	1	1	1	1	1	1	1	1	1	1	1	1					6.1095	6.1095	6.1095		0	0	5										0.0549756	0.0549756	5.32106	3.97595	3.73961	3.48097	3.20398	2.91412	2.61806	2.32304	2.03623	1.76399
	1	1	1	1	1	1	1	1	1	1	1	1	1	1	1	1	1					5.32106	5.32106	5.32106		0	0	5										0.0439805	0.0439805	4.58192	3.42366	3.22015	2.99744	2.75892	2.50933	2.25439	2.00035	1.75338	1.51896
																						4.58192	4.58192	4.58192		0	0	5
																						10.1892	10.1892	10.1892		0	0	5											1	0.0733333	0.0981428	0.104345	0.112098	0.121789	0.133903	0.149046	0.167974	0.191634	0.221209
																						9.9628	9.9628	9.9628		0	0	5											1.25	0.075	0.100373	0.106717	0.114646	0.124557	0.136947	0.152433	0.171792	0.19599	0.226237
																						9.69354	9.69354	9.69354		0	0	5											1.5625	0.0770833	0.103161	0.109681	0.11783	0.128017	0.140751	0.156668	0.176564	0.201434	0.232521
																						9.37676	9.37676	9.37676		0	0	5											1.95312	0.0796875	0.106647	0.113386	0.121811	0.132342	0.145506	0.16196	0.182529	0.208239	0.240377
																						9.00875	9.00875	9.00875		0	0	5											2.44141	0.0829427	0.111003	0.118018	0.126787	0.137748	0.15145	0.168576	0.189985	0.216745	0.250196
																						8.58747	8.58747	8.58747		0	0	5											3.05176	0.0870117	0.116449	0.123808	0.133007	0.144506	0.15888	0.176846	0.199305	0.227378	0.26247
																						8.11321	8.11321	8.11321		0	0	5											3.8147	0.092098	0.123256	0.131045	0.140782	0.152953	0.168167	0.187184	0.210955	0.24067	0.277813
																						7.5893	7.5893	7.5893		0	0	5											4.76837	0.0984558	0.131765	0.140092	0.150501	0.163512	0.179776	0.200106	0.225518	0.257284	0.296991
																						7.02245	7.02245	7.02245		0	0	5											5.96046	0.106403	0.1424	0.1514	0.162649	0.17671	0.194287	0.216258	0.243722	0.278052	0.320964
																						6.4228	6.4228	6.4228		0	0	5											7.45058	0.116337	0.155695	0.165535	0.177834	0.193209	0.212427	0.236449	0.266477	0.304012	0.35093
																						5.80336	5.80336	5.80336		0	0	5											9.31323	0.128755	0.172314	0.183204	0.196816	0.213831	0.235101	0.261687	0.29492	0.336461	0.388388
																						5.179	5.179	5.179		0	0	5											11.6415	0.144277	0.193087	0.20529	0.220543	0.23961	0.263443	0.293235	0.330474	0.377023	0.43521
																						4.56508	4.56508	4.56508		0	0	5											14.5519	0.163679	0.219054	0.232898	0.250202	0.271833	0.298871	0.332669	0.374917	0.427726	0.493738
																						3.97595	3.97595	3.97595		0	0	5											18.1899	0.187933	0.251512	0.267407	0.287276	0.312112	0.343157	0.381963	0.43047	0.491104	0.566897
																						3.42366	3.42366	3.42366		0	0	5											22.7374	0.218249	0.292085	0.310544	0.333618	0.36246	0.398513	0.443579	0.499912	0.570327	0.658347
																						9.58357	9.58357	9.58357		0	0	5
																						9.37061	9.37061	9.37061		0	0	5												13.6364	10.1892	9.58357	8.92075	8.2109	7.46807	6.70934	5.9533	5.21827	4.5206
																						9.11735	9.11735	9.11735		0	0	5												13.3333	9.9628	9.37061	8.72251	8.02843	7.30211	6.56025	5.82101	5.10231	4.42014
																						8.81939	8.81939	8.81939		0	0	5												12.973	9.69354	9.11735	8.48677	7.81145	7.10476	6.38294	5.66368	4.96441	4.30068
																						8.47326	8.47326	8.47326		0	0	5												12.549	9.37676	8.81939	8.20942	7.55617	6.87258	6.17435	5.47859	4.80218	4.16014
																						8.07702	8.07702	8.07702		0	0	5												12.0565	9.00875	8.47326	7.88723	7.25962	6.60285	5.93203	5.26358	4.61371	3.99687
																						7.63095	7.63095	7.63095		0	0	5												11.4927	8.58747	8.07702	7.5184	6.92013	6.29408	5.65462	5.01743	4.39795	3.80996
																						7.13818	7.13818	7.13818		0	0	5												10.858	8.11321	7.63095	7.10318	6.53795	5.94648	5.34234	4.74034	4.15507	3.59955
																						6.60503	6.60503	6.60503		0	0	5												10.1568	7.5893	7.13818	6.64449	6.11576	5.56248	4.99735	4.43423	3.88675	3.3671
																						6.04102	6.04102	6.04102		0	0	5												9.39822	7.02245	6.60503	6.14821	5.65897	5.14702	4.6241	4.10303	3.59645	3.11561
																						5.4584	5.4584	5.4584		0	0	5												8.5957	6.4228	6.04102	5.62321	5.17575	4.70751	4.22924	3.75267	3.28935	2.84957
																						4.87116	4.87116	4.87116		0	0	5												7.7667	5.80336	5.4584	5.08088	4.67658	4.2535	3.82136	3.39075	2.97211	2.57474
																						4.29373	4.29373	4.29373		0	0	5												6.93112	5.179	4.87116	4.53426	4.17345	3.79589	3.41024	3.02596	2.65235	2.29774
																						3.73961	3.73961	3.73961		0	0	5												6.1095	4.56508	4.29373	3.99677	3.67873	3.34592	3.00599	2.66726	2.33794	2.02537
																						3.22015	3.22015	3.22015		0	0	5												5.32106	3.97595	3.73961	3.48097	3.20398	2.91412	2.61806	2.32304	2.03623	1.76399
																						8.92075	8.92075	8.92075		0	0	5												4.58192	3.42366	3.22015	2.99744	2.75892	2.50933	2.25439	2.00035	1.75338	1.51896
																						8.72251	8.72251	8.72251		0	0	5
																						8.48677	8.48677	8.48677		0	0	5												1/s	0	0.0439805	0.0549756	0.0687195	0.0858993	0.107374	0.134218	0.167772	0.209715
																						8.20942	8.20942	8.20942		0	0	5											1	1	0.0733333	0.0981428	0.104345	0.112098	0.121789	0.133903	0.149046	0.167974	0.191634
																						7.88723	7.88723	7.88723		0	0	5											2	1.25	0.075	0.100373	0.106717	0.114646	0.124557	0.136947	0.152433	0.171792	0.19599
																						7.5184	7.5184	7.5184		0	0	5											3	1.5625	0.0770833	0.103161	0.109681	0.11783	0.128017	0.140751	0.156668	0.176564	0.201434
																						7.10318	7.10318	7.10318		0	0	5											4	1.95312	0.0796875	0.106647	0.113386	0.121811	0.132342	0.145506	0.16196	0.182529	0.208239
																						6.64449	6.64449	6.64449		0	0	5											5	2.44141	0.0829427	0.111003	0.118018	0.126787	0.137748	0.15145	0.168576	0.189985	0.216745
																						6.14821	6.14821	6.14821		0	0	5											6	3.05176	0.0870117	0.116449	0.123808	0.133007	0.144506	0.15888	0.176846	0.199305	0.227378
																						5.62321	5.62321	5.62321		0	0	5											7	3.8147	0.092098	0.123256	0.131045	0.140782	0.152953	0.168167	0.187184	0.210955	0.24067
																						5.08088	5.08088	5.08088		0	0	5											8	4.76837	0.0984558	0.131765	0.140092	0.150501	0.163512	0.179776	0.200106	0.225518	0.257284
																						4.53426	4.53426	4.53426		0	0	5											9	5.96046	0.106403	0.1424	0.1514	0.162649	0.17671	0.194287	0.216258	0.243722	0.278052
																						3.99677	3.99677	3.99677		0	0	5											10	7.45058	0.116337	0.155695	0.165535	0.177834	0.193209	0.212427	0.236449	0.266477	0.304012
																						3.48097	3.48097	3.48097		0	0	5											11	9.31323	0.128755	0.172314	0.183204	0.196816	0.213831	0.235101	0.261687	0.29492	0.336461
																						2.99744	2.99744	2.99744		0	0	5											12	11.6415	0.144277	0.193087	0.20529	0.220543	0.23961	0.263443	0.293235	0.330474	0.377023
																						8.2109	8.2109	8.2109		0	0	5											13	14.5519	0.163679	0.219054	0.232898	0.250202	0.271833	0.298871	0.332669	0.374917	0.427726
																						8.02843	8.02843	8.02843		0	0	5											14	18.1899	0.187933	0.251512	0.267407	0.287276	0.312112	0.343157	0.381963	0.43047	0.491104
																						7.81145	7.81145	7.81145		0	0	5											15	22.7374	0.218249	0.292085	0.310544	0.333618	0.36246	0.398513	0.443579	0.499912	0.570327
																						7.55617	7.55617	7.55617		0	0	5
																						7.25962	7.25962	7.25962		0	0	5
																						6.92013	6.92013	6.92013		0	0	5
																						6.53795	6.53795	6.53795		0	0	5
																						6.11576	6.11576	6.11576		0	0	5
																						5.65897	5.65897	5.65897		0	0	5
																						5.17575	5.17575	5.17575		0	0	5
																						4.67658	4.67658	4.67658		0	0	5
																						4.17345	4.17345	4.17345		0	0	5
																						3.67873	3.67873	3.67873		0	0	5
																						3.20398	3.20398	3.20398		0	0	5
																						2.75892	2.75892	2.75892		0	0	5
																						7.46807	7.46807	7.46807		0	0	5
																						7.30211	7.30211	7.30211		0	0	5
																						7.10476	7.10476	7.10476		0	0	5
																						6.87258	6.87258	6.87258		0	0	5
																						6.60285	6.60285	6.60285		0	0	5
																						6.29408	6.29408	6.29408		0	0	5
																						5.94648	5.94648	5.94648		0	0	5
																						5.56248	5.56248	5.56248		0	0	5
																						5.14702	5.14702	5.14702		0	0	5
																						4.70751	4.70751	4.70751		0	0	5
																						4.2535	4.2535	4.2535		0	0	5
																						3.79589	3.79589	3.79589		0	0	5
																						3.34592	3.34592	3.34592		0	0	5
																						2.91412	2.91412	2.91412		0	0	5
																						2.50933	2.50933	2.50933		0	0	5
																						6.70934	6.70934	6.70934		0	0	5
																						6.56025	6.56025	6.56025		0	0	5
																						6.38294	6.38294	6.38294		0	0	5
																						6.17435	6.17435	6.17435		0	0	5
																						5.93203	5.93203	5.93203		0	0	5
																						5.65462	5.65462	5.65462		0	0	5
																						5.34234	5.34234	5.34234		0	0	5
																						4.99735	4.99735	4.99735		0	0	5
																						4.6241	4.6241	4.6241		0	0	5
																						4.22924	4.22924	4.22924		0	0	5
																						3.82136	3.82136	3.82136		0	0	5
																						3.41024	3.41024	3.41024		0	0	5
																						3.00599	3.00599	3.00599		0	0	5
																						2.61806	2.61806	2.61806		0	0	5
																						2.25439	2.25439	2.25439		0	0	5
																						5.9533	5.9533	5.9533		0	0	5
																						5.82101	5.82101	5.82101		0	0	5
																						5.66368	5.66368	5.66368		0	0	5
																						5.47859	5.47859	5.47859		0	0	5
																						5.26358	5.26358	5.26358		0	0	5
																						5.01743	5.01743	5.01743		0	0	5
																						4.74034	4.74034	4.74034		0	0	5
																						4.43423	4.43423	4.43423		0	0	5
																						4.10303	4.10303	4.10303		0	0	5
																						3.75267	3.75267	3.75267		0	0	5
																						3.39075	3.39075	3.39075		0	0	5
																						3.02596	3.02596	3.02596		0	0	5
																						2.66726	2.66726	2.66726		0	0	5
																						2.32304	2.32304	2.32304		0	0	5
																						2.00035	2.00035	2.00035		0	0	5
																						5.21827	5.21827	5.21827		0	0	5
																						5.10231	5.10231	5.10231		0	0	5
																						4.96441	4.96441	4.96441		0	0	5
																						4.80218	4.80218	4.80218		0	0	5
																						4.61371	4.61371	4.61371		0	0	5
																						4.39795	4.39795	4.39795		0	0	5
																						4.15507	4.15507	4.15507		0	0	5
																						3.88675	3.88675	3.88675		0	0	5
																						3.59645	3.59645	3.59645		0	0	5
																						3.28935	3.28935	3.28935		0	0	5
																						2.97211	2.97211	2.97211		0	0	5
																						2.65235	2.65235	2.65235		0	0	5
																						2.33794	2.33794	2.33794		0	0	5
																						2.03623	2.03623	2.03623		0	0	5
																						1.75338	1.75338	1.75338		0	0	5
																						4.5206	4.5206	4.5206		0	0	5
																						4.42014	4.42014	4.42014		0	0	5
																						4.30068	4.30068	4.30068		0	0	5
																						4.16014	4.16014	4.16014		0	0	5
																						3.99687	3.99687	3.99687		0	0	5
																						3.80996	3.80996	3.80996		0	0	5
																						3.59955	3.59955	3.59955		0	0	5
																						3.3671	3.3671	3.3671		0	0	5
																						3.11561	3.11561	3.11561		0	0	5
																						2.84957	2.84957	2.84957		0	0	5
																						2.57474	2.57474	2.57474		0	0	5
																						2.29774	2.29774	2.29774		0	0	5
																						2.02537	2.02537	2.02537		0	0	5
																						1.76399	1.76399	1.76399		0	0	5
																						1.51896	1.51896	1.51896		0	0	5
																						3.87329	3.87329	3.87329		0	0	5
																						3.78722	3.78722	3.78722		0	0	5
																						3.68486	3.68486	3.68486		0	0	5
																						3.56444	3.56444	3.56444		0	0	5
																						3.42455	3.42455	3.42455		0	0	5
																						3.2644	3.2644	3.2644		0	0	5
																						3.08412	3.08412	3.08412		0	0	5
																						2.88496	2.88496	2.88496		0	0	5
																						2.66948	2.66948	2.66948		0	0	5
																						2.44153	2.44153	2.44153		0	0	5
																						2.20606	2.20606	2.20606		0	0	5
																						1.96872	1.96872	1.96872		0	0	5
																						1.73535	1.73535	1.73535		0	0	5
																						1.5114	1.5114	1.5114		0	0	5
																						1.30145	1.30145	1.30145		0	0	5
																						3.28526	3.28526	3.28526		0	0	5
																						3.21226	3.21226	3.21226		0	0	5
																						3.12544	3.12544	3.12544		0	0	5
																						3.0233	3.0233	3.0233		0	0	5
																						2.90465	2.90465	2.90465		0	0	5
																						2.76881	2.76881	2.76881		0	0	5
																						2.6159	2.6159	2.6159		0	0	5
																						2.44698	2.44698	2.44698		0	0	5
																						2.26421	2.26421	2.26421		0	0	5
																						2.07087	2.07087	2.07087		0	0	5
																						1.87115	1.87115	1.87115		0	0	5
																						1.66984	1.66984	1.66984		0	0	5
																						1.4719	1.4719	1.4719		0	0	5
																						1.28194	1.28194	1.28194		0	0	5
																						1.10387	1.10387	1.10387		0	0	5
																						2.76126	2.76126	2.76126		0	0	5
																						2.6999	2.6999	2.6999		0	0	5
																						2.62693	2.62693	2.62693		0	0	5
																						2.54108	2.54108	2.54108		0	0	5
																						2.44135	2.44135	2.44135		0	0	5
																						2.32718	2.32718	2.32718		0	0	5
																						2.19866	2.19866	2.19866		0	0	5
																						2.05668	2.05668	2.05668		0	0	5
																						1.90307	1.90307	1.90307		0	0	5
																						1.74056	1.74056	1.74056		0	0	5
																						1.5727	1.5727	1.5727		0	0	5
																						1.4035	1.4035	1.4035		0	0	5
																						1.23713	1.23713	1.23713		0	0	5
																						1.07747	1.07747	1.07747		0	0	5
																						0.927803	0.927803	0.927803		0	0	5
																						2.30224	2.30224	2.30224		0	0	5
																						2.25108	2.25108	2.25108		0	0	5
																						2.19024	2.19024	2.19024		0	0	5
																						2.11867	2.11867	2.11867		0	0	5
																						2.03552	2.03552	2.03552		0	0	5
																						1.94033	1.94033	1.94033		0	0	5
																						1.83317	1.83317	1.83317		0	0	5
																						1.71479	1.71479	1.71479		0	0	5
																						1.58671	1.58671	1.58671		0	0	5
																						1.45122	1.45122	1.45122		0	0	5
																						1.31126	1.31126	1.31126		0	0	5
																						1.17019	1.17019	1.17019		0	0	5
																						1.03147	1.03147	1.03147		0	0	5
																						0.89836	0.89836	0.89836		0	0	5
																						0.773571	0.773571	0.773571		0	0	5
																						1.90616	1.90616	1.90616		0	0	5
																						1.8638	1.8638	1.8638		0	0	5
																						1.81343	1.81343	1.81343		0	0	5
																						1.75416	1.75416	1.75416		0	0	5
																						1.68532	1.68532	1.68532		0	0	5
																						1.60651	1.60651	1.60651		0	0	5
																						1.51779	1.51779	1.51779		0	0	5
																						1.41977	1.41977	1.41977		0	0	5
																						1.31373	1.31373	1.31373		0	0	5
																						1.20155	1.20155	1.20155		0	0	5
																						1.08567	1.08567	1.08567		0	0	5
																						0.968866	0.968866	0.968866		0	0	5
																						0.854017	0.854017	0.854017		0	0	5
																						0.743804	0.743804	0.743804		0	0	5
																						0.640483	0.640483	0.640483		0	0	5
																						1.56879	1.56879	1.56879		0	0	5
																						1.53392	1.53392	1.53392		0	0	5
																						1.49247	1.49247	1.49247		0	0	5
																						1.44369	1.44369	1.44369		0	0	5
																						1.38703	1.38703	1.38703		0	0	5
																						1.32217	1.32217	1.32217		0	0	5
																						1.24915	1.24915	1.24915		0	0	5
																						1.16849	1.16849	1.16849		0	0	5
																						1.08121	1.08121	1.08121		0	0	5
																						0.988886	0.988886	0.988886		0	0	5
																						0.893514	0.893514	0.893514		0	0	5
																						0.797385	0.797385	0.797385		0	0	5
																						0.702863	0.702863	0.702863		0	0	5
																						0.612157	0.612157	0.612157		0	0	5
																						0.527124	0.527124	0.527124		0	0	5
[truncated: 54 more columns]
