# Supplementary material for: Comparing enzyme activity modifier equations through the development of global data fitting templates in Excel
Source: PeerJ. 2018 Dec 14;6:e6082. doi: 10.7717/peerj.6082 (PMC6296338; doi:10.7717/peerj.6082)
Supplement: Supplemental Information 21 [file peerj-06-6082-s021.xlsx]

## Sheet: Raw data and fitting summary
		No Inhibitor	[I]1	[I]2	[I]3	[I]4	[I]5	[I]6	[I]7	[I]8	[I]9	[I]10	[I]11	[I]12	[I]13	[I]14	[I]15
		0	0.0439805	0.0549756	0.0687195	0.0858993	0.107374	0.134218	0.167772	0.209715	0.262144	0.32768	0.4096	0.512	0.64	0.8	1
[S]1	1	13.6364	13.2295	13.1315	13.0111	12.8637	12.684	12.4663	12.2045	11.8923	11.5238	11.0942	10.6001	10.0412	9.42029	8.74439	8.02469
[S]2	0.8	13.3333	12.8503	12.7349	12.5937	12.4214	12.2126	11.9612	11.6612	11.3067	10.8928	10.4161	9.87592	9.27467	8.61878	7.91878	7.18894
[S]3	0.64	12.973	12.4058	12.2717	12.108	11.9095	11.6704	11.3846	11.0465	10.6511	10.1949	9.67682	9.09886	8.46676	7.79026	7.08286	6.36086
[S]4	0.512	12.549	11.8917	11.7379	11.5513	11.3262	11.0568	10.7376	10.3636	9.93121	9.43896	8.88826	8.2841	7.63536	6.95458	6.25721	5.56026
[S]5	0.4096	12.0565	11.3059	11.1327	10.9234	10.6727	10.375	10.0254	9.62021	9.15758	8.63832	8.06658	7.45019	6.80063	6.1323	5.46141	4.80439
[S]6	0.32768	11.4927	10.6502	10.4586	10.2285	9.95471	9.63244	9.25782	8.82861	8.345	7.81022	7.23098	6.61751	5.98301	5.34268	4.71227	4.10657
[S]7	0.262144	10.858	9.93032	9.72265	9.47497	9.18256	8.84149	8.4492	8.00522	7.51181	6.97447	6.40203	5.80632	5.20134	4.60197	4.02255	3.47556
[S]8	0.209715	10.1568	9.15663	8.93662	8.67604	8.37094	8.01846	7.61752	7.16941	6.67834	6.15164	5.59961	5.03484	4.47115	3.92224	3.40042	2.91556
[S]9	0.167772	9.39822	8.34402	8.11641	7.84879	7.5381	7.18269	6.78294	6.34175	5.86491	5.36103	4.84113	4.31773	3.80368	3.31094	2.84953	2.42678
[S]10	0.134218	8.5957	7.51082	7.28108	7.01294	6.70431	6.35474	5.9659	5.54202	5.08995	4.61899	4.14014	3.66518	3.20551	2.77109	2.36966	2.00635
[S]11	0.107374	7.7667	6.67735	6.45114	6.18906	5.88996	5.55442	5.18518	4.78737	4.36843	3.9377	3.50563	3.0828	2.67891	2.30192	1.95758	1.6492
[S]12	0.0858993	6.93112	5.86396	5.64661	5.39658	5.11355	4.79894	4.45623	4.09103	3.71089	3.32472	2.94202	2.57196	2.22251	1.89985	1.60803	1.34902
[S]13	0.0687195	6.1095	5.08906	4.88508	4.652	4.39016	4.10159	3.79018	3.46165	3.12324	2.78315	2.44971	2.13063	1.83231	1.55938	1.31461	1.09898
[S]14	0.0549756	5.32106	4.36761	4.18035	3.9677	3.7305	3.4711	3.19353	2.90332	2.60717	2.31233	2.02594	1.75434	1.50255	1.27399	1.07045	0.892261
[S]15	0.0439805	4.58192	3.71015	3.54168	3.35146	3.14061	2.91164	2.66845	2.41619	2.16085	1.90871	1.66575	1.43709	1.22662	1.03681	0.868761	0.722403
		Direct linear plot Km, Vmax estimates
							1.18717	1	13.6364	1	1	1	13.6364	1	13.6364
		Km	0.1				1.06042	0.8	13.3333	1	1	0.8	13.3333	0.8	13.3333
		Vmax	15					0.64	12.973	1	1	0.64	12.973	0.64	12.973
								0.512	12.549	1	1	0.512	12.549	0.512	12.549
	Ki estimate based on linear decrease in activity							0.4096	12.0565	1	1	0.4096	12.0565	0.4096	12.0565
								0.32768	11.4927	1	1	0.32768	11.4927	0.32768	11.4927
		Ki	1.18717					0.262144	10.858	1	1	0.262144	10.858	0.262144	10.858
								0.209715	10.1568	1	1	0.209715	10.1568	0.209715	10.1568
								0.167772	9.39822	1	1	0.167772	9.39822	0.167772	9.39822
								0.134218	8.5957	1	1	0.134218	8.5957	0.134218	8.5957
								0.107374	7.7667	1	1	0.107374	7.7667	0.107374	7.7667
								0.0858993	6.93112	1	1	0.0858993	6.93112	0.0858993	6.93112
								0.0687195	6.1095	1	1	0.0687195	6.1095	0.0687195	6.1095
								0.0549756	5.32106	1	1	0.0549756	5.32106	0.0549756	5.32106
								0.0439805	4.58192	1	1	0.0439805	4.58192	0.0439805	4.58192
			Km	Km2	Vmax	Vmax2	Ki	aKi	RSS	RSE	n	k	BIC
		Non-competitive	0.205183		18.1652		0.673057		95.926	0.6362	240	3	-88.4453
		Competitive	0.0999956		14.9998		0.129995		3.2881e-07	3.72476e-05	240	3	-2120.04
		Uncompetitive	0.265962		19.4234		0.455698		225.482	0.975399	240	3	0.636994
		Mixed Non-competitive	0.0999986		15		0.13	31267.6	1.90902e-07	2.84412e-05	240	4	-2174.34
		Modifier equation	0.100096	85.0789	15.0081	8.01884	110.395		0.00133173	0.00238053	240	5	-1249.49
													Residual distribution
													Non-competitive	Competitive	Uncompetitive	Mixed Non-competitive	Modifier equation
												Minimum value	-1.96113	-8.71869e-05	-2.41163	-9.54082e-05	-0.00646208
												First quartile	-0.332375	-2.04028e-05	-0.557244	-7.51382e-06	-0.000908979
												Median value	0.0731073	3.72926e-06	0.0480273	1.53517e-05	-0.000126351
					Non-competitive	Competitive	Uncompetitive	Mixed Non-competitive	Modifier equation			Third quartile	0.551551	2.36875e-05	0.796761	2.64218e-05	0.00169485
				Q1	-0.332375	-2.04028e-05	-0.557244	-7.51382e-06	-0.000908979			Maximum value	1.43618	9.47523e-05	1.77561	3.67262e-05	0.00664725
				Min	-1.96113	-8.71869e-05	-2.41163	-9.54082e-05	-0.00646208
				Median	0.0731073	3.72926e-06	0.0480273	1.53517e-05	-0.000126351
				Max	1.43618	9.47523e-05	1.77561	3.67262e-05	0.00664725
				Q3	0.551551	2.36875e-05	0.796761	2.64218e-05	0.00169485
	Non-competitive
	Km	0.205183
	Vmax	18.1652
	Ki	0.673057
	RSS	95.926
	Competitive
	Km	0.0999956
	Vmax	14.9998
	Ki	0.129995
	RSS	3.2881e-07
	Uncompetitive
	Km	0.265962
	Vmax	19.4234
	Ki	0.455698
	RSS	225.482
	Mixed Non-competitive
	Km	0.0999986
	Vmax	15
	Ki	0.13
	aKi	31267.6
	RSS	1.90902e-07
	Modifier equation
	Km	0.100096
	Km2	85.0789
	Vmax	15.0081
	Vmax2	8.01884
	Ki	110.395
	RSS	0.00133173

## Sheet: modified direct linear plot
Km/Vmax direct plot
									Intercept points x-axis																				Intercept points x-axis
										Line 1	Line 2	Line 3	Line 4	Line 5	Line 6	Line 7	Line 8	Line 9	Line 10	Line 11	Line 12	Line 13	Line 14	Line 15						Line 1	Line 2	Line 3	Line 4	Line 5	Line 6	Line 7	Line 8	Line 9	Line 10	Line 11	Line 12	Line 13	Line 14	Line 15
			x-intercept	y-interecept					Line 1																				Line 1
[Substrate]		v	[Substrate]/v	1/v					Line 2	0.00666667																			Line 2	0.00666667
1		13.6364	0.0733333	0.0733333					Line 3	0.00666667	0.00666667																		Line 3	0.00666667	0.00666667
0.8		13.3333	0.06	0.075					Line 4	0.00666667	0.00666667	0.00666667																	Line 4	0.00666667	0.00666667	0.00666667
0.64		12.973	0.0493333	0.0770833					Line 5	0.00666667	0.00666667	0.00666667	0.00666667																Line 5	0.00666667	0.00666667	0.00666667	0.00666667
0.512		12.549	0.0408	0.0796875					Line 6	0.00666667	0.00666667	0.00666667	0.00666667	0.00666667															Line 6	0.00666667	0.00666667	0.00666667	0.00666667	0.00666667
0.4096		12.0565	0.0339733	0.0829427					Line 7	0.00666667	0.00666667	0.00666667	0.00666667	0.00666667	0.00666667														Line 7	0.00666667	0.00666667	0.00666667	0.00666667	0.00666667	0.00666667
0.32768		11.4927	0.028512	0.0870117					Line 8	0.00666667	0.00666667	0.00666667	0.00666667	0.00666667	0.00666667	0.00666667													Line 8	0.00666667	0.00666667	0.00666667	0.00666667	0.00666667	0.00666667	0.00666667
0.262144		10.858	0.0241429	0.092098					Line 9	0.00666667	0.00666667	0.00666667	0.00666667	0.00666667	0.00666667	0.00666667	0.00666667												Line 9	0.00666667	0.00666667	0.00666667	0.00666667	0.00666667	0.00666667	0.00666667	0.00666667
0.209715		10.1568	0.0206477	0.0984558					Line 10	0.00666667	0.00666667	0.00666667	0.00666667	0.00666667	0.00666667	0.00666667	0.00666667	0.00666667											Line 10	0.00666667	0.00666667	0.00666667	0.00666667	0.00666667	0.00666667	0.00666667	0.00666667	0.00666667
0.167772		9.39822	0.0178515	0.106403					Line 11	0.00666667	0.00666667	0.00666667	0.00666667	0.00666667	0.00666667	0.00666667	0.00666667	0.00666667	0.00666667										Line 11	0.00666667	0.00666667	0.00666667	0.00666667	0.00666667	0.00666667	0.00666667	0.00666667	0.00666667	0.00666667
0.134218		8.5957	0.0156145	0.116337					Line 12	0.00666667	0.00666667	0.00666667	0.00666667	0.00666667	0.00666667	0.00666667	0.00666667	0.00666667	0.00666667	0.00666667									Line 12	0.00666667	0.00666667	0.00666667	0.00666667	0.00666667	0.00666667	0.00666667	0.00666667	0.00666667	0.00666667	0.00666667
0.107374		7.7667	0.0138249	0.128755					Line 13	0.00666667	0.00666667	0.00666667	0.00666667	0.00666667	0.00666667	0.00666667	0.00666667	0.00666667	0.00666667	0.00666667	0.00666667								Line 13	0.00666667	0.00666667	0.00666667	0.00666667	0.00666667	0.00666667	0.00666667	0.00666667	0.00666667	0.00666667	0.00666667	0.00666667
0.0858993		6.93112	0.0123933	0.144277					Line 14	0.00666667	0.00666667	0.00666667	0.00666667	0.00666667	0.00666667	0.00666667	0.00666667	0.00666667	0.00666667	0.00666667	0.00666667	0.00666667							Line 14	0.00666667	0.00666667	0.00666667	0.00666667	0.00666667	0.00666667	0.00666667	0.00666667	0.00666667	0.00666667	0.00666667	0.00666667	0.00666667
0.0687195		6.1095	0.011248	0.163679					Line 15	0.00666667	0.00666667	0.00666667	0.00666667	0.00666667	0.00666667	0.00666667	0.00666667	0.00666667	0.00666667	0.00666667	0.00666667	0.00666667	0.00666667						Line 15	0.00666667	0.00666667	0.00666667	0.00666667	0.00666667	0.00666667	0.00666667	0.00666667	0.00666667	0.00666667	0.00666667	0.00666667	0.00666667	0.00666667
0.0549756		5.32106	0.0103317	0.187933
0.0439805		4.58192	0.0095987	0.218249
																														Km/Vmax (x-axis):	0.00666667		Km:	0.1
																														Standard dev:	1.56806e-17
Line 1	x	y
	0	0.0733333		Slope:	-1
	0.0733333	0		y-intercept:	0.0733333				1/Intercept points y-axis																				1/Intercept points y-axis
										Line 1	Line 2	Line 3	Line 4	Line 5	Line 6	Line 7	Line 8	Line 9	Line 10	Line 11	Line 12	Line 13	Line 14	Line 15						Line 1	Line 2	Line 3	Line 4	Line 5	Line 6	Line 7	Line 8	Line 9	Line 10	Line 11	Line 12	Line 13	Line 14	Line 15
Line 2	x	y							Line 1																				Line 1
	0	0.075		Slope:	-1.25				Line 2	15																			Line 2	15
	0.06	0		y-intercept:	0.075				Line 3	15	15																		Line 3	15	15
									Line 4	15	15	15																	Line 4	15	15	15
Line 3	x	y							Line 5	15	15	15	15																Line 5	15	15	15	15
	0	0.0770833		Slope:	-1.5625				Line 6	15	15	15	15	15															Line 6	15	15	15	15	15
	0.0493333	0		y-intercept:	0.0770833				Line 7	15	15	15	15	15	15														Line 7	15	15	15	15	15	15
									Line 8	15	15	15	15	15	15	15													Line 8	15	15	15	15	15	15	15
Line 4	x	y							Line 9	15	15	15	15	15	15	15	15												Line 9	15	15	15	15	15	15	15	15
	0	0.0796875		Slope:	-1.95312				Line 10	15	15	15	15	15	15	15	15	15											Line 10	15	15	15	15	15	15	15	15	15
	0.0408	0		y-intercept:	0.0796875				Line 11	15	15	15	15	15	15	15	15	15	15										Line 11	15	15	15	15	15	15	15	15	15	15
									Line 12	15	15	15	15	15	15	15	15	15	15	15									Line 12	15	15	15	15	15	15	15	15	15	15	15
Line 5	x	y							Line 13	15	15	15	15	15	15	15	15	15	15	15	15								Line 13	15	15	15	15	15	15	15	15	15	15	15	15
	0	0.0829427		Slope:	-2.44141				Line 14	15	15	15	15	15	15	15	15	15	15	15	15	15							Line 14	15	15	15	15	15	15	15	15	15	15	15	15	15
	0.0339733	0		y-intercept:	0.0829427				Line 15	15	15	15	15	15	15	15	15	15	15	15	15	15	15						Line 15	15	15	15	15	15	15	15	15	15	15	15	15	15	15
Line 6	x	y
	0	0.0870117		Slope:	-3.05176
	0.028512	0		y-intercept:	0.0870117
Line 7	x	y																												Vmax:	15
	0	0.092098		Slope:	-3.8147																									Standard dev:	9.7482e-15
	0.0241429	0		y-intercept:	0.092098
Line 8	x	y
	0	0.0984558		Slope:	-4.76837
	0.0206477	0		y-intercept:	0.0984558
Line 9	x	y
	0	0.106403		Slope:	-5.96046
	0.0178515	0		y-intercept:	0.106403
Line 10	x	y
	0	0.116337		Slope:	-7.45058
	0.0156145	0		y-intercept:	0.116337
Line 11	x	y										0	0.0733333	0.075	0.0770833	0.0796875	0.0829427	0.0870117	0.092098	0.0984558	0.106403	0.116337	0.128755	0.144277	0.163679	0.187933	0.218249	0	0	0	0
	0	0.128755		Slope:	-9.31323							0.0733333	0
	0.0138249	0		y-intercept:	0.128755							0.06		0
												0.0493333			0
Line 12	x	y										0.0408				0
	0	0.144277		Slope:	-11.6415							0.0339733					0
	0.0123933	0		y-intercept:	0.144277							0.028512						0
												0.0241429							0
Line 13	x	y										0.0206477								0
	0	0.163679		Slope:	-14.5519							0.0178515									0
	0.011248	0		y-intercept:	0.163679							0.0156145										0
												0.0138249											0
Line 14	x	y										0.0123933												0
	0	0.187933		Slope:	-18.1899							0.011248													0
	0.0103317	0		y-intercept:	0.187933							0.0103317														0
												0.0095987															0
Line 15	x	y										0																0
	0	0.218249		Slope:	-22.7374							0																	0
	0.0095987	0		y-intercept:	0.218249							0																		0
												0																			0

## Sheet: Non-competitive
																							Calculated values
		No Inhibitor	[I]1	[I]2	[I]3	[I]4	[I]5	[I]6	[I]7	[I]8	[I]9	[I]10	[I]11	[I]12	[I]13	[I]14	[I]15						No Inhibitor	[I]1	[I]2	[I]3	[I]4	[I]5	[I]6	[I]7	[I]8	[I]9	[I]10	[I]11	[I]12	[I]13	[I]14	[I]15
		0	0.0439805	0.0549756	0.0687195	0.0858993	0.107374	0.134218	0.167772	0.209715	0.262144	0.32768	0.4096	0.512	0.64	0.8	1		Km	Vmax	Ki		0	0.0439805	0.0549756	0.0687195	0.0858993	0.107374	0.134218	0.167772	0.209715	0.262144	0.32768	0.4096	0.512	0.64	0.8	1
[S]1	1	13.6364	13.2295	13.1315	13.0111	12.8637	12.684	12.4663	12.2045	11.8923	11.5238	11.0942	10.6001	10.0412	9.42029	8.74439	8.02469		0.205183	18.1652	0.673057		15.0725	14.148	13.9344	13.6762	13.3666	12.9988	12.5666	12.0651	11.4918	10.8476	10.1372	9.37017	8.5605	7.726	6.88682	6.06356		15.0725	14.148	13.9344	13.6762	13.3666	12.9988	12.5666	12.0651	11.4918	10.8476
[S]2	0.8	13.3333	12.8503	12.7349	12.5937	12.4214	12.2126	11.9612	11.6612	11.3067	10.8928	10.4161	9.87592	9.27467	8.61878	7.91878	7.18894						14.4572	13.5705	13.3655	13.1179	12.8209	12.4681	12.0535	11.5725	11.0227	10.4047	9.72336	8.98764	8.21102	7.41059	6.60567	5.81602		14.4572	13.5705	13.3655	13.1179	12.8209	12.4681	12.0535	11.5725	11.0227	10.4047
[S]3	0.64	12.973	12.4058	12.2717	12.108	11.9095	11.6704	11.3846	11.0465	10.6511	10.1949	9.67682	9.09886	8.46676	7.79026	7.08286	6.36086						13.7553	12.9116	12.7166	12.4809	12.1984	11.8628	11.4683	11.0106	10.4875	9.89956	9.25126	8.55125	7.81235	7.05078	6.28494	5.53363		13.7553	12.9116	12.7166	12.4809	12.1984	11.8628	11.4683	11.0106	10.4875	9.89956
[S]4	0.512	12.549	11.8917	11.7379	11.5513	11.3262	11.0568	10.7376	10.3636	9.93121	9.43896	8.88826	8.2841	7.63536	6.95458	6.25721	5.56026						12.9682	12.1728	11.9889	11.7668	11.5004	11.184	10.8121	10.3806	9.88741	9.33311	8.72191	8.06196	7.36533	6.64734	5.92532	5.217		12.9682	12.1728	11.9889	11.7668	11.5004	11.184	10.8121	10.3806	9.88741	9.33311
[S]5	0.4096	12.0565	11.3059	11.1327	10.9234	10.6727	10.375	10.0254	9.62021	9.15758	8.63832	8.06658	7.45019	6.80063	6.1323	5.46141	4.80439						12.1026	11.3602	11.1887	10.9814	10.7328	10.4375	10.0904	9.68772	9.22743	8.71013	8.13972	7.52382	6.8737	6.20363	5.52981	4.86877		12.1026	11.3602	11.1887	10.9814	10.7328	10.4375	10.0904	9.68772	9.22743	8.71013
[S]6	0.32768	11.4927	10.6502	10.4586	10.2285	9.95471	9.63244	9.25782	8.82861	8.345	7.81022	7.23098	6.61751	5.98301	5.34268	4.71227	4.10657			Sum R2	95.926		11.1705	10.4854	10.327	10.1357	9.90624	9.63365	9.31332	8.94166	8.51681	8.03935	7.51287	6.9444	6.34434	5.72588	5.10395	4.49381		11.1705	10.4854	10.327	10.1357	9.90624	9.63365	9.31332	8.94166	8.51681	8.03935
[S]7	0.262144	10.858	9.93032	9.72265	9.47497	9.18256	8.84149	8.4492	8.00522	7.51181	6.97447	6.40203	5.80632	5.20134	4.60197	4.02255	3.47556			Sum residuals %	26.3127		10.1896	9.56464	9.42019	9.24565	9.03636	8.78771	8.4955	8.15648	7.76894	7.3334	6.85315	6.3346	5.78724	5.22308	4.65576	4.09921		10.1896	9.56464	9.42019	9.24565	9.03636	8.78771	8.4955	8.15648	7.76894	7.3334
[S]8	0.209715	10.1568	9.15663	8.93662	8.67604	8.37094	8.01846	7.61752	7.16941	6.67834	6.15164	5.59961	5.03484	4.47115	3.92224	3.40042	2.91556						9.1818	8.61862	8.48846	8.33118	8.14259	7.91854	7.65523	7.34974	7.00053	6.60807	6.17532	5.70806	5.21483	4.70648	4.19527	3.69376		9.1818	8.61862	8.48846	8.33118	8.14259	7.91854	7.65523	7.34974	7.00053	6.60807
[S]9	0.167772	9.39822	8.34402	8.11641	7.84879	7.5381	7.18269	6.78294	6.34175	5.86491	5.36103	4.84113	4.31773	3.80368	3.31094	2.84953	2.42678						8.17152	7.6703	7.55446	7.41449	7.24666	7.04725	6.81292	6.54104	6.23026	5.88098	5.49585	5.08	4.64104	4.18862	3.73366	3.28733		8.17152	7.6703	7.55446	7.41449	7.24666	7.04725	6.81292	6.54104	6.23026	5.88098
[S]10	0.134218	8.5957	7.51082	7.28108	7.01294	6.70431	6.35474	5.9659	5.54202	5.08995	4.61899	4.14014	3.66518	3.20551	2.77109	2.36966	2.00635						7.18351	6.7429	6.64106	6.51801	6.37047	6.19518	5.98917	5.75017	5.47696	5.16991	4.83135	4.46578	4.0799	3.68218	3.28223	2.88987		7.18351	6.7429	6.64106	6.51801	6.37047	6.19518	5.98917	5.75017	5.47696	5.16991
[S]11	0.107374	7.7667	6.67735	6.45114	6.18906	5.88996	5.55442	5.18518	4.78737	4.36843	3.9377	3.50563	3.0828	2.67891	2.30192	1.95758	1.6492						6.24036	5.8576	5.76913	5.66224	5.53407	5.38179	5.20284	4.99521	4.75787	4.49114	4.19703	3.87945	3.54423	3.19873	2.85129	2.51045		6.24036	5.8576	5.76913	5.66224	5.53407	5.38179	5.20284	4.99521	4.75787	4.49114
[S]12	0.0858993	6.93112	5.86396	5.64661	5.39658	5.11355	4.79894	4.45623	4.09103	3.71089	3.32472	2.94202	2.57196	2.22251	1.89985	1.60803	1.34902						5.3606	5.0318	4.95581	4.86398	4.75388	4.62307	4.46934	4.29099	4.08711	3.85798	3.60533	3.33253	3.04457	2.74778	2.44932	2.15653		5.3606	5.0318	4.95581	4.86398	4.75388	4.62307	4.46934	4.29099	4.08711	3.85798
[S]13	0.0687195	6.1095	5.08906	4.88508	4.652	4.39016	4.10159	3.79018	3.46165	3.12324	2.78315	2.44971	2.13063	1.83231	1.55938	1.31461	1.09898						4.55746	4.27792	4.21332	4.13525	4.04165	3.93043	3.79974	3.6481	3.47477	3.27997	3.06517	2.83325	2.58843	2.3361	2.08236	1.83343		4.55746	4.27792	4.21332	4.13525	4.04165	3.93043	3.79974	3.6481	3.47477	3.27997
[S]14	0.0549756	5.32106	4.36761	4.18035	3.9677	3.7305	3.4711	3.19353	2.90332	2.60717	2.31233	2.02594	1.75434	1.50255	1.27399	1.07045	0.892261						3.83858	3.60314	3.54872	3.48297	3.40413	3.31046	3.20038	3.07266	2.92667	2.7626	2.58168	2.38634	2.18014	1.96761	1.75389	1.54423		3.83858	3.60314	3.54872	3.48297	3.40413	3.31046	3.20038	3.07266	2.92667	2.7626
[S]15	0.0439805	4.58192	3.71015	3.54168	3.35146	3.14061	2.91164	2.66845	2.41619	2.16085	1.90871	1.66575	1.43709	1.22662	1.03681	0.868761	0.722403						3.20638	3.00971	2.96426	2.90933	2.84348	2.76523	2.67328	2.5666	2.44466	2.30761	2.15649	1.99331	1.82107	1.64355	1.46503	1.2899		3.20638	3.00971	2.96426	2.90933	2.84348	2.76523	2.67328	2.5666	2.44466	2.30761
	1	1	1	1	1	1	1	1	1	1	1	1	1	1	1	1	1																					1	1	15.0725	14.148	13.9344	13.6762	13.3666	12.9988	12.5666	12.0651	11.4918	10.8476
	1	1	1	1	1	1	1	1	1	1	1	1	1	1	1	1	1					13.6364	13.6364	15.0725		1.43618	1.43618	1										0.8	0.8	14.4572	13.5705	13.3655	13.1179	12.8209	12.4681	12.0535	11.5725	11.0227	10.4047
	1	1	1	1	1	1	1	1	1	1	1	1	1	1	1	1	1					13.3333	13.3333	14.4572		1.12387	1.12387	1										0.64	0.64	13.7553	12.9116	12.7166	12.4809	12.1984	11.8628	11.4683	11.0106	10.4875	9.89956
	1	1	1	1	1	1	1	1	1	1	1	1	1	1	1	1	1					12.973	12.973	13.7553		0.782284	0.782284	1										0.512	0.512	12.9682	12.1728	11.9889	11.7668	11.5004	11.184	10.8121	10.3806	9.88741	9.33311
	1	1	1	1	1	1	1	1	1	1	1	1	1	1	1	1	1					12.549	12.549	12.9682		0.419173	0.419173	1										0.4096	0.4096	12.1026	11.3602	11.1887	10.9814	10.7328	10.4375	10.0904	9.68772	9.22743	8.71013
	1	1	1	1	1	1	1	1	1	1	1	1	1	1	1	1	1					12.0565	12.0565	12.1026		0.0460535	0.0460535	1										0.32768	0.32768	11.1705	10.4854	10.327	10.1357	9.90624	9.63365	9.31332	8.94166	8.51681	8.03935
	1	1	1	1	1	1	1	1	1	1	1	1	1	1	1	1	1					11.4927	11.4927	11.1705		-0.322175	-0.322175	1										0.262144	0.262144	10.1896	9.56464	9.42019	9.24565	9.03636	8.78771	8.4955	8.15648	7.76894	7.3334
	1	1	1	1	1	1	1	1	1	1	1	1	1	1	1	1	1					10.858	10.858	10.1896		-0.668371	-0.668371	1										0.209715	0.209715	9.1818	8.61862	8.48846	8.33118	8.14259	7.91854	7.65523	7.34974	7.00053	6.60807
	1	1	1	1	1	1	1	1	1	1	1	1	1	1	1	1	1					10.1568	10.1568	9.1818		-0.975043	-0.975043	1										0.167772	0.167772	8.17152	7.6703	7.55446	7.41449	7.24666	7.04725	6.81292	6.54104	6.23026	5.88098
	1	1	1	1	1	1	1	1	1	1	1	1	1	1	1	1	1					9.39822	9.39822	8.17152		-1.22671	-1.22671	1										0.134218	0.134218	7.18351	6.7429	6.64106	6.51801	6.37047	6.19518	5.98917	5.75017	5.47696	5.16991
	1	1	1	1	1	1	1	1	1	1	1	1	1	1	1	1	1					8.5957	8.5957	7.18351		-1.4122	-1.4122	1										0.107374	0.107374	6.24036	5.8576	5.76913	5.66224	5.53407	5.38179	5.20284	4.99521	4.75787	4.49114
	1	1	1	1	1	1	1	1	1	1	1	1	1	1	1	1	1					7.7667	7.7667	6.24036		-1.52634	-1.52634	1										0.0858993	0.0858993	5.3606	5.0318	4.95581	4.86398	4.75388	4.62307	4.46934	4.29099	4.08711	3.85798
	1	1	1	1	1	1	1	1	1	1	1	1	1	1	1	1	1					6.93112	6.93112	5.3606		-1.57052	-1.57052	1										0.0687195	0.0687195	4.55746	4.27792	4.21332	4.13525	4.04165	3.93043	3.79974	3.6481	3.47477	3.27997
	1	1	1	1	1	1	1	1	1	1	1	1	1	1	1	1	1					6.1095	6.1095	4.55746		-1.55204	-1.55204	1										0.0549756	0.0549756	3.83858	3.60314	3.54872	3.48297	3.40413	3.31046	3.20038	3.07266	2.92667	2.7626
	1	1	1	1	1	1	1	1	1	1	1	1	1	1	1	1	1					5.32106	5.32106	3.83858		-1.48247	-1.48247	1										0.0439805	0.0439805	3.20638	3.00971	2.96426	2.90933	2.84348	2.76523	2.67328	2.5666	2.44466	2.30761
																						4.58192	4.58192	3.20638		-1.37554	-1.37554	1
		1	1	1	1	1	1	1	1	1	1	1	1	1	1	1	1					13.2295	13.2295	14.148		0.918566	0.918566	1											1	0.0663458	0.0706811	0.071765	0.0731197	0.0748132	0.0769301	0.0795761	0.0828837	0.0870182	0.0921863
		1	1	1	1	1	1	1	1	1	1	1	1	1	1	1	1					12.8503	12.8503	13.5705		0.720165	0.720165	1											1.25	0.0691697	0.0736895	0.0748195	0.0762319	0.0779975	0.0802044	0.0829631	0.0864115	0.0907219	0.09611
		1	1	1	1	1	1	1	1	1	1	1	1	1	1	1	1					12.4058	12.4058	12.9116		0.505753	0.505753	1											1.5625	0.0726995	0.07745	0.0786376	0.0801221	0.0819778	0.0842974	0.0871968	0.0908212	0.0953516	0.101015
		1	1	1	1	1	1	1	1	1	1	1	1	1	1	1	1					11.8917	11.8917	12.1728		0.281118	0.281118	1											1.95312	0.0771117	0.0821506	0.0834103	0.0849849	0.0869532	0.0894135	0.092489	0.0963333	0.101139	0.107145
		1	1	1	1	1	1	1	1	1	1	1	1	1	1	1	1					11.3059	11.3059	11.3602		0.0543009	0.0543009	1											2.44141	0.0826271	0.0880263	0.0893761	0.0910634	0.0931724	0.0958088	0.0991042	0.103223	0.108373	0.114809
		1	1	1	1	1	1	1	1	1	1	1	1	1	1	1	1					10.6502	10.6502	10.4854		-0.16486	-0.16486	1											3.05176	0.0895213	0.095371	0.0968334	0.0986614	0.100946	0.103803	0.107373	0.111836	0.117415	0.124388
		1	1	1	1	1	1	1	1	1	1	1	1	1	1	1	1					9.93032	9.93032	9.56464		-0.365685	-0.365685	1											3.8147	0.098139	0.104552	0.106155	0.108159	0.110664	0.113795	0.117709	0.122602	0.128718	0.136362
		1	1	1	1	1	1	1	1	1	1	1	1	1	1	1	1					9.15663	9.15663	8.61862		-0.538014	-0.538014	1											4.76837	0.108911	0.116028	0.117807	0.120031	0.122811	0.126286	0.13063	0.136059	0.142846	0.15133
		1	1	1	1	1	1	1	1	1	1	1	1	1	1	1	1					8.34402	8.34402	7.6703		-0.673711	-0.673711	1											5.96046	0.122376	0.130373	0.132372	0.134871	0.137995	0.141899	0.14678	0.152881	0.160507	0.17004
		1	1	1	1	1	1	1	1	1	1	1	1	1	1	1	1					7.51082	7.51082	6.7429		-0.767922	-0.767922	1											7.45058	0.139208	0.148304	0.150578	0.153421	0.156974	0.161416	0.166968	0.173908	0.182583	0.193427
		1	1	1	1	1	1	1	1	1	1	1	1	1	1	1	1					6.67735	6.67735	5.8576		-0.819753	-0.819753	1											9.31323	0.160247	0.170718	0.173336	0.176608	0.180699	0.185812	0.192203	0.200192	0.210178	0.222661
		1	1	1	1	1	1	1	1	1	1	1	1	1	1	1	1					5.86396	5.86396	5.0318		-0.832159	-0.832159	1											11.6415	0.186546	0.198736	0.201784	0.205593	0.210354	0.216306	0.223746	0.233047	0.244672	0.259203
		1	1	1	1	1	1	1	1	1	1	1	1	1	1	1	1					5.08906	5.08906	4.27792		-0.811136	-0.811136	1											14.5519	0.21942	0.233758	0.237343	0.241823	0.247424	0.254425	0.263176	0.274115	0.287789	0.304881
		1	1	1	1	1	1	1	1	1	1	1	1	1	1	1	1					4.36761	4.36761	3.60314		-0.76447	-0.76447	1											18.1899	0.260513	0.277536	0.281792	0.287111	0.293761	0.302073	0.312463	0.325451	0.341685	0.361978
		1	1	1	1	1	1	1	1	1	1	1	1	1	1	1	1					3.71015	3.71015	3.00971		-0.700436	-0.700436	1											22.7374	0.311878	0.332258	0.337353	0.343721	0.351682	0.361633	0.374072	0.38962	0.409055	0.43335
																						13.1315	13.1315	13.9344		0.802849	0.802849	1
n	240																					12.7349	12.7349	13.3655		0.630559	0.630559	1												13.6364	13.2295	13.1315	13.0111	12.8637	12.684	12.4663	12.2045	11.8923	11.5238
																						12.2717	12.2717	12.7166		0.444883	0.444883	1												13.3333	12.8503	12.7349	12.5937	12.4214	12.2126	11.9612	11.6612	11.3067	10.8928
																						11.7379	11.7379	11.9889		0.250998	0.250998	1												12.973	12.4058	12.2717	12.108	11.9095	11.6704	11.3846	11.0465	10.6511	10.1949
																						11.1327	11.1327	11.1887		0.0559981	0.0559981	1												12.549	11.8917	11.7379	11.5513	11.3262	11.0568	10.7376	10.3636	9.93121	9.43896
																						10.4586	10.4586	10.327		-0.131548	-0.131548	1												12.0565	11.3059	11.1327	10.9234	10.6727	10.375	10.0254	9.62021	9.15758	8.63832
																						9.72265	9.72265	9.42019		-0.302465	-0.302465	1												11.4927	10.6502	10.4586	10.2285	9.95471	9.63244	9.25782	8.82861	8.345	7.81022
																						8.93662	8.93662	8.48846		-0.448166	-0.448166	1												10.858	9.93032	9.72265	9.47497	9.18256	8.84149	8.4492	8.00522	7.51181	6.97447
																						8.11641	8.11641	7.55446		-0.561945	-0.561945	1												10.1568	9.15663	8.93662	8.67604	8.37094	8.01846	7.61752	7.16941	6.67834	6.15164
																						7.28108	7.28108	6.64106		-0.640016	-0.640016	1												9.39822	8.34402	8.11641	7.84879	7.5381	7.18269	6.78294	6.34175	5.86491	5.36103
																						6.45114	6.45114	5.76913		-0.68201	-0.68201	1												8.5957	7.51082	7.28108	7.01294	6.70431	6.35474	5.9659	5.54202	5.08995	4.61899
																						5.64661	5.64661	4.95581		-0.690805	-0.690805	1												7.7667	6.67735	6.45114	6.18906	5.88996	5.55442	5.18518	4.78737	4.36843	3.9377
																						4.88508	4.88508	4.21332		-0.67176	-0.67176	1												6.93112	5.86396	5.64661	5.39658	5.11355	4.79894	4.45623	4.09103	3.71089	3.32472
																						4.18035	4.18035	3.54872		-0.631624	-0.631624	1												6.1095	5.08906	4.88508	4.652	4.39016	4.10159	3.79018	3.46165	3.12324	2.78315
																						3.54168	3.54168	2.96426		-0.577427	-0.577427	1												5.32106	4.36761	4.18035	3.9677	3.7305	3.4711	3.19353	2.90332	2.60717	2.31233
																						13.0111	13.0111	13.6762		0.66509	0.66509	1												4.58192	3.71015	3.54168	3.35146	3.14061	2.91164	2.66845	2.41619	2.16085	1.90871
																						12.5937	12.5937	13.1179		0.524216	0.524216	1
																						12.108	12.108	12.4809		0.3729	0.3729	1												1/s	0	0.0439805	0.0549756	0.0687195	0.0858993	0.107374	0.134218	0.167772	0.209715
																						11.5513	11.5513	11.7668		0.215513	0.215513	1											1	1	0.0663458	0.0706811	0.071765	0.0731197	0.0748132	0.0769301	0.0795761	0.0828837	0.0870182
																						10.9234	10.9234	10.9814		0.0579445	0.0579445	1											2	1.25	0.0691697	0.0736895	0.0748195	0.0762319	0.0779975	0.0802044	0.0829631	0.0864115	0.0907219
																						10.2285	10.2285	10.1357		-0.0927955	-0.0927955	1											3	1.5625	0.0726995	0.07745	0.0786376	0.0801221	0.0819778	0.0842974	0.0871968	0.0908212	0.0953516
																						9.47497	9.47497	9.24565		-0.229321	-0.229321	1											4	1.95312	0.0771117	0.0821506	0.0834103	0.0849849	0.0869532	0.0894135	0.092489	0.0963333	0.101139
																						8.67604	8.67604	8.33118		-0.344863	-0.344863	1											5	2.44141	0.0826271	0.0880263	0.0893761	0.0910634	0.0931724	0.0958088	0.0991042	0.103223	0.108373
																						7.84879	7.84879	7.41449		-0.434295	-0.434295	1											6	3.05176	0.0895213	0.095371	0.0968334	0.0986614	0.100946	0.103803	0.107373	0.111836	0.117415
																						7.01294	7.01294	6.51801		-0.494924	-0.494924	1											7	3.8147	0.098139	0.104552	0.106155	0.108159	0.110664	0.113795	0.117709	0.122602	0.128718
																						6.18906	6.18906	5.66224		-0.52682	-0.52682	1											8	4.76837	0.108911	0.116028	0.117807	0.120031	0.122811	0.126286	0.13063	0.136059	0.142846
																						5.39658	5.39658	4.86398		-0.532598	-0.532598	1											9	5.96046	0.122376	0.130373	0.132372	0.134871	0.137995	0.141899	0.14678	0.152881	0.160507
																						4.652	4.652	4.13525		-0.516745	-0.516745	1											10	7.45058	0.139208	0.148304	0.150578	0.153421	0.156974	0.161416	0.166968	0.173908	0.182583
																						3.9677	3.9677	3.48297		-0.48473	-0.48473	1											11	9.31323	0.160247	0.170718	0.173336	0.176608	0.180699	0.185812	0.192203	0.200192	0.210178
																						3.35146	3.35146	2.90933		-0.442128	-0.442128	1											12	11.6415	0.186546	0.198736	0.201784	0.205593	0.210354	0.216306	0.223746	0.233047	0.244672
																						12.8637	12.8637	13.3666		0.50297	0.50297	1											13	14.5519	0.21942	0.233758	0.237343	0.241823	0.247424	0.254425	0.263176	0.274115	0.287789
																						12.4214	12.4214	12.8209		0.39955	0.39955	1											14	18.1899	0.260513	0.277536	0.281792	0.287111	0.293761	0.302073	0.312463	0.325451	0.341685
																						11.9095	11.9095	12.1984		0.288885	0.288885	1											15	22.7374	0.311878	0.332258	0.337353	0.343721	0.351682	0.361633	0.374072	0.38962	0.409055
																						11.3262	11.3262	11.5004		0.174285	0.174285	1
																						10.6727	10.6727	10.7328		0.0601276	0.0601276	1
																						9.95471	9.95471	9.90624		-0.0484655	-0.0484655	1
																						9.18256	9.18256	9.03636		-0.146201	-0.146201	1
																						8.37094	8.37094	8.14259		-0.228343	-0.228343	1
																						7.5381	7.5381	7.24666		-0.291439	-0.291439	1
																						6.70431	6.70431	6.37047		-0.333843	-0.333843	1
																						5.88996	5.88996	5.53407		-0.355888	-0.355888	1
																						5.11355	5.11355	4.75388		-0.359667	-0.359667	1
																						4.39016	4.39016	4.04165		-0.348518	-0.348518	1
																						3.7305	3.7305	3.40413		-0.326368	-0.326368	1
																						3.14061	3.14061	2.84348		-0.297134	-0.297134	1
																						12.684	12.684	12.9988		0.314852	0.314852	1
																						12.2126	12.2126	12.4681		0.255586	0.255586	1
																						11.6704	11.6704	11.8628		0.19239	0.19239	1
																						11.0568	11.0568	11.184		0.127194	0.127194	1
																						10.375	10.375	10.4375		0.0625081	0.0625081	1
																						9.63244	9.63244	9.63365		0.00121111	0.00121111	1
																						8.84149	8.84149	8.78771		-0.0537801	-0.0537801	1
																						8.01846	8.01846	7.91854		-0.0999228	-0.0999228	1
																						7.18269	7.18269	7.04725		-0.135437	-0.135437	1
																						6.35474	6.35474	6.19518		-0.159564	-0.159564	1
																						5.55442	5.55442	5.38179		-0.172625	-0.172625	1
																						4.79894	4.79894	4.62307		-0.175868	-0.175868	1
																						4.10159	4.10159	3.93043		-0.171162	-0.171162	1
																						3.4711	3.4711	3.31046		-0.160644	-0.160644	1
																						2.91164	2.91164	2.76523		-0.146403	-0.146403	1
																						12.4663	12.4663	12.5666		0.100284	0.100284	1
																						11.9612	11.9612	12.0535		0.0923552	0.0923552	1
																						11.3846	11.3846	11.4683		0.0837059	0.0837059	1
																						10.7376	10.7376	10.8121		0.07451	0.07451	1
																						10.0254	10.0254	10.0904		0.0650098	0.0650098	1
																						9.25782	9.25782	9.31332		0.0555005	0.0555005	1
																						8.4492	8.4492	8.4955		0.0462999	0.0462999	1
																						7.61752	7.61752	7.65523		0.0377102	0.0377102	1
																						6.78294	6.78294	6.81292		0.0299794	0.0299794	1
																						5.9659	5.9659	5.98917		0.0232724	0.0232724	1
																						5.18518	5.18518	5.20284		0.0176583	0.0176583	1
																						4.45623	4.45623	4.46934		0.0131167	0.0131167	1
																						3.79018	3.79018	3.79974		0.00955744	0.00955744	1
																						3.19353	3.19353	3.20038		0.00684711	0.00684711	1
																						2.66845	2.66845	2.67328		0.00483524	0.00483524	1
																						12.2045	12.2045	12.0651		-0.1394	-0.1394	1
																						11.6612	11.6612	11.5725		-0.0886433	-0.0886433	1
																						11.0465	11.0465	11.0106		-0.0358276	-0.0358276	1
																						10.3636	10.3636	10.3806		0.0170309	0.0170309	1
																						9.62021	9.62021	9.68772		0.0675125	0.0675125	1
																						8.82861	8.82861	8.94166		0.113047	0.113047	1
																						8.00522	8.00522	8.15648		0.151256	0.151256	1
																						7.16941	7.16941	7.34974		0.180326	0.180326	1
																						6.34175	6.34175	6.54104		0.199288	0.199288	1
																						5.54202	5.54202	5.75017		0.208153	0.208153	1
																						4.78737	4.78737	4.99521		0.207842	0.207842	1
																						4.09103	4.09103	4.29099		0.199957	0.199957	1
																						3.46165	3.46165	3.6481		0.186456	0.186456	1
																						2.90332	2.90332	3.07266		0.169341	0.169341	1
																						2.41619	2.41619	2.5666		0.150413	0.150413	1
																						11.8923	11.8923	11.4918		-0.400463	-0.400463	1
																						11.3067	11.3067	11.0227		-0.28399	-0.28399	1
																						10.6511	10.6511	10.4875		-0.163552	-0.163552	1
																						9.93121	9.93121	9.88741		-0.0437997	-0.0437997	1
																						9.15758	9.15758	9.22743		0.069848	0.069848	1
																						8.345	8.345	8.51681		0.171812	0.171812	1
																						7.51181	7.51181	7.76894		0.257124	0.257124	1
																						6.67834	6.67834	7.00053		0.322193	0.322193	1
																						5.86491	5.86491	6.23026		0.365348	0.365348	1
																						5.08995	5.08995	5.47696		0.387007	0.387007	1
																						4.36843	4.36843	4.75787		0.389442	0.389442	1
																						3.71089	3.71089	4.08711		0.376222	0.376222	1
																						3.12324	3.12324	3.47477		0.351528	0.351528	1
																						2.60717	2.60717	2.92667		0.319506	0.319506	1
																						2.16085	2.16085	2.44466		0.283807	0.283807	1
																						11.5238	11.5238	10.8476		-0.676246	-0.676246	1
																						10.8928	10.8928	10.4047		-0.488017	-0.488017	1
																						10.1949	10.1949	9.89956		-0.295324	-0.295324	1
																						9.43896	9.43896	9.33311		-0.105846	-0.105846	1
																						8.63832	8.63832	8.71013		0.0718052	0.0718052	1
																						7.81022	7.81022	8.03935		0.229126	0.229126	1
																						6.97447	6.97447	7.3334		0.358929	0.358929	1
																						6.15164	6.15164	6.60807		0.456434	0.456434	1
																						5.36103	5.36103	5.88098		0.519948	0.519948	1
																						4.61899	4.61899	5.16991		0.550923	0.550923	1
																						3.9377	3.9377	4.49114		0.553437	0.553437	1
																						3.32472	3.32472	3.85798		0.533263	0.533263	1
																						2.78315	2.78315	3.27997		0.49682	0.49682	1
																						2.31233	2.31233	2.7626		0.45027	0.45027	1
																						1.90871	1.90871	2.30761		0.398895	0.398895	1
																						11.0942	11.0942	10.1372		-0.956958	-0.956958	1
																						10.4161	10.4161	9.72336		-0.69275	-0.69275	1
																						9.67682	9.67682	9.25126		-0.425563	-0.425563	1
																						8.88826	8.88826	8.72191		-0.166349	-0.166349	1
																						8.06658	8.06658	8.13972		0.0731461	0.0731461	1
																						7.23098	7.23098	7.51287		0.281884	0.281884	1
																						6.40203	6.40203	6.85315		0.451127	0.451127	1
																						5.59961	5.59961	6.17532		0.575718	0.575718	1
																						4.84113	4.84113	5.49585		0.654716	0.654716	1
																						4.14014	4.14014	4.83135		0.691205	0.691205	1
																						3.50563	3.50563	4.19703		0.691393	0.691393	1
																						2.94202	2.94202	3.60533		0.66331	0.66331	1
																						2.44971	2.44971	3.06517		0.615462	0.615462	1
																						2.02594	2.02594	2.58168		0.55574	0.55574	1
																						1.66575	1.66575	2.15649		0.490736	0.490736	1
																						10.6001	10.6001	9.37017		-1.22996	-1.22996	1
																						9.87592	9.87592	8.98764		-0.888283	-0.888283	1
																						9.09886	9.09886	8.55125		-0.547609	-0.547609	1
																						8.2841	8.2841	8.06196		-0.222145	-0.222145	1
																						7.45019	7.45019	7.52382		0.0736334	0.0736334	1
																						6.61751	6.61751	6.9444		0.326894	0.326894	1
																						5.80632	5.80632	6.3346		0.528286	0.528286	1
																						5.03484	5.03484	5.70806		0.673224	0.673224	1
																						4.31773	4.31773	5.08		0.762274	0.762274	1
																						3.66518	3.66518	4.46578		0.800598	0.800598	1
																						3.0828	3.0828	3.87945		0.796654	0.796654	1
																						2.57196	2.57196	3.33253		0.760573	0.760573	1
																						2.13063	2.13063	2.83325		0.702613	0.702613	1
																						1.75434	1.75434	2.38634		0.631994	0.631994	1
																						1.43709	1.43709	1.99331		0.556223	0.556223	1
																						10.0412	10.0412	8.5605		-1.48069	-1.48069	1
																						9.27467	9.27467	8.21102		-1.06365	-1.06365	1
																						8.46676	8.46676	7.81235		-0.654411	-0.654411	1
																						7.63536	7.63536	7.36533		-0.270033	-0.270033	1
																						6.80063	6.80063	6.8737		0.0730686	0.0730686	1
																						5.98301	5.98301	6.34434		0.36133	0.36133	1
																						5.20134	5.20134	5.78724		0.585898	0.585898	1
																						4.47115	4.47115	5.21483		0.743684	0.743684	1
																						3.80368	3.80368	4.64104		0.837363	0.837363	1
																						3.20551	3.20551	4.0799		0.874385	0.874385	1
																						2.67891	2.67891	3.54423		0.865328	0.865328	1
																						2.22251	2.22251	3.04457		0.82206	0.82206	1
																						1.83231	1.83231	2.58843		0.756121	0.756121	1
																						1.50255	1.50255	2.18014		0.677583	0.677583	1
																						1.22662	1.22662	1.82107		0.594456	0.594456	1
																						9.42029	9.42029	7.726		-1.69429	-1.69429	1
																						8.61878	8.61878	7.41059		-1.20819	-1.20819	1
																						7.79026	7.79026	7.05078		-0.739483	-0.739483	1
																						6.95458	6.95458	6.64734		-0.307244	-0.307244	1
																						6.1323	6.1323	6.20363		0.0713295	0.0713295	1
																						5.34268	5.34268	5.72588		0.383199	0.383199	1
																						4.60197	4.60197	5.22308		0.621113	0.621113	1
																						3.92224	3.92224	4.70648		0.784237	0.784237	1
																						3.31094	3.31094	4.18862		0.877676	0.877676	1
																						2.77109	2.77109	3.68218		0.91109	0.91109	1
																						2.30192	2.30192	3.19873		0.896812	0.896812	1
																						1.89985	1.89985	2.74778		0.84793	0.84793	1
																						1.55938	1.55938	2.3361		0.776721	0.776721	1
																						1.27399	1.27399	1.96761		0.693619	0.693619	1
																						1.03681	1.03681	1.64355		0.606745	0.606745	1
																						8.74439	8.74439	6.88682		-1.85757	-1.85757	1
																						7.91878	7.91878	6.60567		-1.31311	-1.31311	1
																						7.08286	7.08286	6.28494		-0.79792	-0.79792	1
																						6.25721	6.25721	5.92532		-0.331886	-0.331886	1
																						5.46141	5.46141	5.52981		0.0683992	0.0683992	1
																						4.71227	4.71227	5.10395		0.39168	0.39168	1
																						4.02255	4.02255	4.65576		0.633211	0.633211	1
																						3.40042	3.40042	4.19527		0.794852	0.794852	1
																						2.84953	2.84953	3.73366		0.884132	0.884132	1
																						2.36966	2.36966	3.28223		0.912572	0.912572	1
																						1.95758	1.95758	2.85129		0.893719	0.893719	1
																						1.60803	1.60803	2.44932		0.841289	0.841289	1
																						1.31461	1.31461	2.08236		0.767747	0.767747	1
																						1.07045	1.07045	1.75389		0.683442	0.683442	1
																						0.868761	0.868761	1.46503		0.596271	0.596271	1
																						8.02469	8.02469	6.06356		-1.96113	-1.96113	1
																						7.18894	7.18894	5.81602		-1.37292	-1.37292	1
																						6.36086	6.36086	5.53363		-0.827228	-0.827228	1
																						5.56026	5.56026	5.217		-0.34326	-0.34326	1
																						4.80439	4.80439	4.86877		0.0643765	0.0643765	1
																						4.10657	4.10657	4.49381		0.387242	0.387242	1
																						3.47556	3.47556	4.09921		0.623646	0.623646	1
																						2.91556	2.91556	3.69376		0.778206	0.778206	1
																						2.42678	2.42678	3.28733		0.86055	0.86055	1
																						2.00635	2.00635	2.88987		0.883519	0.883519	1
																						1.6492	1.6492	2.51045		0.86125	0.86125	1
																						1.34902	1.34902	2.15653		0.807504	0.807504	1
																						1.09898	1.09898	1.83343		0.734446	0.734446	1
																						0.892261	0.892261	1.54423		0.651969	0.651969	1
																						0.722403	0.722403	1.2899		0.567496	0.567496	1
[truncated: 54 more columns]

## Sheet: Competitive
																							Calculated values
		No Inhibitor	[I]1	[I]2	[I]3	[I]4	[I]5	[I]6	[I]7	[I]8	[I]9	[I]10	[I]11	[I]12	[I]13	[I]14	[I]15						No Inhibitor	[I]1	[I]2	[I]3	[I]4	[I]5	[I]6	[I]7	[I]8	[I]9	[I]10	[I]11	[I]12	[I]13	[I]14	[I]15
		0	0.0439805	0.0549756	0.0687195	0.0858993	0.107374	0.134218	0.167772	0.209715	0.262144	0.32768	0.4096	0.512	0.64	0.8	1		Km	Vmax	Ki		0	0.0439805	0.0549756	0.0687195	0.0858993	0.107374	0.134218	0.167772	0.209715	0.262144	0.32768	0.4096	0.512	0.64	0.8	1
[S]1	1	13.6364	13.2295	13.1315	13.0111	12.8637	12.684	12.4663	12.2045	11.8923	11.5238	11.0942	10.6001	10.0412	9.42029	8.74439	8.02469		0.0999956	14.9998	0.129995		13.6363	13.2294	13.1314	13.011	12.8636	12.6839	12.4662	12.2044	11.8922	11.5238	11.0941	10.6001	10.0411	9.42024	8.74435	8.02466		13.6363	13.2294	13.1314	13.011	12.8636	12.6839	12.4662	12.2044	11.8922	11.5238
[S]2	0.8	13.3333	12.8503	12.7349	12.5937	12.4214	12.2126	11.9612	11.6612	11.3067	10.8928	10.4161	9.87592	9.27467	8.61878	7.91878	7.18894						13.3333	12.8502	12.7349	12.5936	12.4213	12.2125	11.9611	11.6611	11.3066	10.8927	10.4161	9.87587	9.27463	8.61875	7.91875	7.18891		13.3333	12.8502	12.7349	12.5936	12.4213	12.2125	11.9611	11.6611	11.3066	10.8927
[S]3	0.64	12.973	12.4058	12.2717	12.108	11.9095	11.6704	11.3846	11.0465	10.6511	10.1949	9.67682	9.09886	8.46676	7.79026	7.08286	6.36086						12.9729	12.4058	12.2716	12.108	11.9095	11.6703	11.3846	11.0464	10.651	10.1948	9.67678	9.09883	8.46673	7.79024	7.08284	6.36084		12.9729	12.4058	12.2716	12.108	11.9095	11.6703	11.3846	11.0464	10.651	10.1948
[S]4	0.512	12.549	11.8917	11.7379	11.5513	11.3262	11.0568	10.7376	10.3636	9.93121	9.43896	8.88826	8.2841	7.63536	6.95458	6.25721	5.56026						12.549	11.8916	11.7379	11.5512	11.3261	11.0568	10.7376	10.3636	9.93119	9.43893	8.88823	8.28408	7.63534	6.95457	6.25719	5.56025		12.549	11.8916	11.7379	11.5512	11.3261	11.0568	10.7376	10.3636	9.93119	9.43893
[S]5	0.4096	12.0565	11.3059	11.1327	10.9234	10.6727	10.375	10.0254	9.62021	9.15758	8.63832	8.06658	7.45019	6.80063	6.1323	5.46141	4.80439						12.0565	11.3059	11.1327	10.9234	10.6726	10.3749	10.0254	9.62019	9.15757	8.63831	8.06656	7.45018	6.80062	6.13229	5.4614	4.80438		12.0565	11.3059	11.1327	10.9234	10.6726	10.3749	10.0254	9.62019	9.15757	8.63831
[S]6	0.32768	11.4927	10.6502	10.4586	10.2285	9.95471	9.63244	9.25782	8.82861	8.345	7.81022	7.23098	6.61751	5.98301	5.34268	4.71227	4.10657			Sum R2	3.2881e-07		11.4927	10.6502	10.4586	10.2285	9.9547	9.63244	9.25781	8.8286	8.345	7.81022	7.23098	6.6175	5.98301	5.34268	4.71226	4.10657		11.4927	10.6502	10.4586	10.2285	9.9547	9.63244	9.25781	8.8286	8.345	7.81022
[S]7	0.262144	10.858	9.93032	9.72265	9.47497	9.18256	8.84149	8.4492	8.00522	7.51181	6.97447	6.40203	5.80632	5.20134	4.60197	4.02255	3.47556			Sum residuals %	0.0010856		10.858	9.93033	9.72266	9.47498	9.18257	8.8415	8.44921	8.00523	7.51182	6.97448	6.40203	5.80632	5.20134	4.60197	4.02255	3.47556		10.858	9.93033	9.72266	9.47498	9.18257	8.8415	8.44921	8.00523	7.51182	6.97448
[S]8	0.209715	10.1568	9.15663	8.93662	8.67604	8.37094	8.01846	7.61752	7.16941	6.67834	6.15164	5.59961	5.03484	4.47115	3.92224	3.40042	2.91556						10.1569	9.15666	8.93665	8.67607	8.37096	8.01848	7.61754	7.16943	6.67835	6.15165	5.59961	5.03485	4.47115	3.92224	3.40042	2.91556		10.1569	9.15666	8.93665	8.67607	8.37096	8.01848	7.61754	7.16943	6.67835	6.15165
[S]9	0.167772	9.39822	8.34402	8.11641	7.84879	7.5381	7.18269	6.78294	6.34175	5.86491	5.36103	4.84113	4.31773	3.80368	3.31094	2.84953	2.42678						9.39828	8.34406	8.11645	7.84882	7.53813	7.18272	6.78296	6.34177	5.86493	5.36105	4.84114	4.31773	3.80368	3.31095	2.84953	2.42679		9.39828	8.34406	8.11645	7.84882	7.53813	7.18272	6.78296	6.34177	5.86493	5.36105
[S]10	0.134218	8.5957	7.51082	7.28108	7.01294	6.70431	6.35474	5.9659	5.54202	5.08995	4.61899	4.14014	3.66518	3.20551	2.77109	2.36966	2.00635						8.59577	7.51087	7.28113	7.01298	6.70435	6.35478	5.96593	5.54204	5.08998	4.61901	4.14016	3.66519	3.20552	2.77109	2.36966	2.00635		8.59577	7.51087	7.28113	7.01298	6.70435	6.35478	5.96593	5.54204	5.08998	4.61901
[S]11	0.107374	7.7667	6.67735	6.45114	6.18906	5.88996	5.55442	5.18518	4.78737	4.36843	3.9377	3.50563	3.0828	2.67891	2.30192	1.95758	1.6492						7.76678	6.67741	6.4512	6.18911	5.89	5.55446	5.18521	4.7874	4.36846	3.93772	3.50565	3.08281	2.67891	2.30193	1.95758	1.6492		7.76678	6.67741	6.4512	6.18911	5.89	5.55446	5.18521	4.7874	4.36846	3.93772
[S]12	0.0858993	6.93112	5.86396	5.64661	5.39658	5.11355	4.79894	4.45623	4.09103	3.71089	3.32472	2.94202	2.57196	2.22251	1.89985	1.60803	1.34902						6.93121	5.86402	5.64667	5.39663	5.1136	4.79898	4.45626	4.09106	3.71091	3.32474	2.94204	2.57197	2.22252	1.89985	1.60804	1.34902		6.93121	5.86402	5.64667	5.39663	5.1136	4.79898	4.45626	4.09106	3.71091	3.32474
[S]13	0.0687195	6.1095	5.08906	4.88508	4.652	4.39016	4.10159	3.79018	3.46165	3.12324	2.78315	2.44971	2.13063	1.83231	1.55938	1.31461	1.09898						6.1096	5.08912	4.88514	4.65205	4.39021	4.10164	3.79021	3.46168	3.12327	2.78317	2.44972	2.13064	1.83231	1.55938	1.31461	1.09899		6.1096	5.08912	4.88514	4.65205	4.39021	4.10164	3.79021	3.46168	3.12327	2.78317
[S]14	0.0549756	5.32106	4.36761	4.18035	3.9677	3.7305	3.4711	3.19353	2.90332	2.60717	2.31233	2.02594	1.75434	1.50255	1.27399	1.07045	0.892261						5.32115	4.36767	4.1804	3.96775	3.73054	3.47114	3.19356	2.90335	2.60719	2.31234	2.02595	1.75435	1.50256	1.274	1.07045	0.892263		5.32115	4.36767	4.1804	3.96775	3.73054	3.47114	3.19356	2.90335	2.60719	2.31234
[S]15	0.0439805	4.58192	3.71015	3.54168	3.35146	3.14061	2.91164	2.66845	2.41619	2.16085	1.90871	1.66575	1.43709	1.22662	1.03681	0.868761	0.722403						4.58201	3.71021	3.54174	3.35151	3.14065	2.91167	2.66848	2.41621	2.16087	1.90872	1.66576	1.4371	1.22662	1.03681	0.868764	0.722405		4.58201	3.71021	3.54174	3.35151	3.14065	2.91167	2.66848	2.41621	2.16087	1.90872
	1	1	1	1	1	1	1	1	1	1	1	1	1	1	1	1	1																					1	1	13.6363	13.2294	13.1314	13.011	12.8636	12.6839	12.4662	12.2044	11.8922	11.5238
	1	1	1	1	1	1	1	1	1	1	1	1	1	1	1	1	1					13.6364	13.6364	13.6363		-8.71869e-05	-8.71869e-05	2										0.8	0.8	13.3333	12.8502	12.7349	12.5936	12.4213	12.2125	11.9611	11.6611	11.3066	10.8927
	1	1	1	1	1	1	1	1	1	1	1	1	1	1	1	1	1					13.3333	13.3333	13.3333		-7.34924e-05	-7.34924e-05	2										0.64	0.64	12.9729	12.4058	12.2716	12.108	11.9095	11.6703	11.3846	11.0464	10.651	10.1948
	1	1	1	1	1	1	1	1	1	1	1	1	1	1	1	1	1					12.973	12.973	12.9729		-5.79026e-05	-5.79026e-05	2										0.512	0.512	12.549	11.8916	11.7379	11.5512	11.3261	11.0568	10.7376	10.3636	9.93119	9.43893
	1	1	1	1	1	1	1	1	1	1	1	1	1	1	1	1	1					12.549	12.549	12.549		-4.05291e-05	-4.05291e-05	2										0.4096	0.4096	12.0565	11.3059	11.1327	10.9234	10.6726	10.3749	10.0254	9.62019	9.15757	8.63831
	1	1	1	1	1	1	1	1	1	1	1	1	1	1	1	1	1					12.0565	12.0565	12.0565		-2.16598e-05	-2.16598e-05	2										0.32768	0.32768	11.4927	10.6502	10.4586	10.2285	9.9547	9.63244	9.25781	8.8286	8.345	7.81022
	1	1	1	1	1	1	1	1	1	1	1	1	1	1	1	1	1					11.4927	11.4927	11.4927		-1.79161e-06	-1.79161e-06	2										0.262144	0.262144	10.858	9.93033	9.72266	9.47498	9.18257	8.8415	8.44921	8.00523	7.51182	6.97448
	1	1	1	1	1	1	1	1	1	1	1	1	1	1	1	1	1					10.858	10.858	10.858		1.83614e-05	1.83614e-05	2										0.209715	0.209715	10.1569	9.15666	8.93665	8.67607	8.37096	8.01848	7.61754	7.16943	6.67835	6.15165
	1	1	1	1	1	1	1	1	1	1	1	1	1	1	1	1	1					10.1568	10.1568	10.1569		3.78989e-05	3.78989e-05	2										0.167772	0.167772	9.39828	8.34406	8.11645	7.84882	7.53813	7.18272	6.78296	6.34177	5.86493	5.36105
	1	1	1	1	1	1	1	1	1	1	1	1	1	1	1	1	1					9.39822	9.39822	9.39828		5.58151e-05	5.58151e-05	2										0.134218	0.134218	8.59577	7.51087	7.28113	7.01298	6.70435	6.35478	5.96593	5.54204	5.08998	4.61901
	1	1	1	1	1	1	1	1	1	1	1	1	1	1	1	1	1					8.5957	8.5957	8.59577		7.11226e-05	7.11226e-05	2										0.107374	0.107374	7.76678	6.67741	6.4512	6.18911	5.89	5.55446	5.18521	4.7874	4.36846	3.93772
	1	1	1	1	1	1	1	1	1	1	1	1	1	1	1	1	1					7.7667	7.7667	7.76678		8.29994e-05	8.29994e-05	2										0.0858993	0.0858993	6.93121	5.86402	5.64667	5.39663	5.1136	4.79898	4.45626	4.09106	3.71091	3.32474
	1	1	1	1	1	1	1	1	1	1	1	1	1	1	1	1	1					6.93112	6.93112	6.93121		9.09231e-05	9.09231e-05	2										0.0687195	0.0687195	6.1096	5.08912	4.88514	4.65205	4.39021	4.10164	3.79021	3.46168	3.12327	2.78317
	1	1	1	1	1	1	1	1	1	1	1	1	1	1	1	1	1					6.1095	6.1095	6.1096		9.47523e-05	9.47523e-05	2										0.0549756	0.0549756	5.32115	4.36767	4.1804	3.96775	3.73054	3.47114	3.19356	2.90335	2.60719	2.31234
	1	1	1	1	1	1	1	1	1	1	1	1	1	1	1	1	1					5.32106	5.32106	5.32115		9.47328e-05	9.47328e-05	2										0.0439805	0.0439805	4.58201	3.71021	3.54174	3.35151	3.14065	2.91167	2.66848	2.41621	2.16087	1.90872
																						4.58192	4.58192	4.58201		9.14289e-05	9.14289e-05	2
																						13.2295	13.2295	13.2294		-8.26071e-05	-8.26071e-05	2											1	0.0733338	0.0755892	0.0761531	0.0768579	0.0777389	0.0788402	0.0802168	0.0819375	0.0840884	0.0867771
																						12.8503	12.8503	12.8502		-6.89071e-05	-6.89071e-05	2											1.25	0.0750004	0.0778197	0.0785245	0.0794055	0.0805068	0.0818834	0.0836041	0.0857551	0.0884437	0.0918045
																						12.4058	12.4058	12.4058		-5.36998e-05	-5.36998e-05	2											1.5625	0.0770837	0.0806078	0.0814888	0.0825901	0.0839666	0.0856874	0.0878383	0.090527	0.0938878	0.0980888
																						11.8917	11.8917	11.8916		-3.7255e-05	-3.7255e-05	2											1.95312	0.0796878	0.0840929	0.0851941	0.0865707	0.0882915	0.0904424	0.0931311	0.0964919	0.100693	0.105944
																						11.3059	11.3059	11.3059		-2.00195e-05	-2.00195e-05	2											2.44141	0.0829429	0.0884492	0.0898258	0.0915466	0.0936975	0.0963862	0.099747	0.103948	0.109199	0.115763
																						10.6502	10.6502	10.6502		-2.61739e-06	-2.61739e-06	2											3.05176	0.0870117	0.0938947	0.0956154	0.0977664	0.100455	0.103816	0.108017	0.113268	0.119832	0.128037
																						9.93032	9.93032	9.93033		1.41855e-05	1.41855e-05	2											3.8147	0.0920978	0.100702	0.102852	0.105541	0.108902	0.113103	0.118354	0.124918	0.133124	0.14338
																						9.15663	9.15663	9.15666		2.95561e-05	2.95561e-05	2											4.76837	0.0984554	0.10921	0.111899	0.11526	0.119461	0.124712	0.131276	0.139481	0.149738	0.162558
																						8.34402	8.34402	8.34406		4.27024e-05	4.27024e-05	2											5.96046	0.106402	0.119846	0.123207	0.127408	0.132659	0.139223	0.147428	0.157685	0.170505	0.186531
																						7.51082	7.51082	7.51087		5.29924e-05	5.29924e-05	2											7.45058	0.116336	0.13314	0.137341	0.142593	0.149157	0.157362	0.167618	0.180439	0.196465	0.216497
																						6.67735	6.67735	6.67741		6.00552e-05	6.00552e-05	2											9.31323	0.128753	0.149759	0.15501	0.161574	0.169779	0.180036	0.192856	0.208882	0.228914	0.253954
																						5.86396	5.86396	5.86402		6.38325e-05	6.38325e-05	2											11.6415	0.144275	0.170531	0.177096	0.185301	0.195557	0.208378	0.224403	0.244435	0.269475	0.300776
																						5.08906	5.08906	5.08912		6.45687e-05	6.45687e-05	2											14.5519	0.163677	0.196497	0.204703	0.214959	0.22778	0.243805	0.263837	0.288877	0.320178	0.359303
																						4.36761	4.36761	4.36767		6.27435e-05	6.27435e-05	2											18.1899	0.187929	0.228955	0.239211	0.252032	0.268058	0.28809	0.31313	0.34443	0.383555	0.432461
																						3.71015	3.71015	3.71021		5.89717e-05	5.89717e-05	2											22.7374	0.218245	0.269527	0.282347	0.298373	0.318405	0.343445	0.374745	0.413871	0.462777	0.52391
																						13.1315	13.1315	13.1314		-8.15227e-05	-8.15227e-05	2
																						12.7349	12.7349	12.7349		-6.78337e-05	-6.78337e-05	2												13.6364	13.2295	13.1315	13.0111	12.8637	12.684	12.4663	12.2045	11.8923	11.5238
																						12.2717	12.2717	12.2716		-5.27283e-05	-5.27283e-05	2												13.3333	12.8503	12.7349	12.5937	12.4214	12.2126	11.9612	11.6612	11.3067	10.8928
																						11.7379	11.7379	11.7379		-3.65077e-05	-3.65077e-05	2												12.973	12.4058	12.2717	12.108	11.9095	11.6704	11.3846	11.0465	10.6511	10.1949
																						11.1327	11.1327	11.1327		-1.96464e-05	-1.96464e-05	2												12.549	11.8917	11.7379	11.5513	11.3262	11.0568	10.7376	10.3636	9.93121	9.43896
																						10.4586	10.4586	10.4586		-2.78412e-06	-2.78412e-06	2												12.0565	11.3059	11.1327	10.9234	10.6727	10.375	10.0254	9.62021	9.15758	8.63832
																						9.72265	9.72265	9.72266		1.33174e-05	1.33174e-05	2												11.4927	10.6502	10.4586	10.2285	9.95471	9.63244	9.25782	8.82861	8.345	7.81022
																						8.93662	8.93662	8.93665		2.78562e-05	2.78562e-05	2												10.858	9.93032	9.72265	9.47497	9.18256	8.84149	8.4492	8.00522	7.51181	6.97447
																						8.11641	8.11641	8.11645		4.00985e-05	4.00985e-05	2												10.1568	9.15663	8.93662	8.67604	8.37094	8.01846	7.61752	7.16941	6.67834	6.15164
																						7.28108	7.28108	7.28113		4.94923e-05	4.94923e-05	2												9.39822	8.34402	8.11641	7.84879	7.5381	7.18269	6.78294	6.34175	5.86491	5.36103
																						6.45114	6.45114	6.4512		5.57531e-05	5.57531e-05	2												8.5957	7.51082	7.28108	7.01294	6.70431	6.35474	5.9659	5.54202	5.08995	4.61899
																						5.64661	5.64661	5.64667		5.88991e-05	5.88991e-05	2												7.7667	6.67735	6.45114	6.18906	5.88996	5.55442	5.18518	4.78737	4.36843	3.9377
																						4.88508	4.88508	4.88514		5.92257e-05	5.92257e-05	2												6.93112	5.86396	5.64661	5.39658	5.11355	4.79894	4.45623	4.09103	3.71089	3.32472
																						4.18035	4.18035	4.1804		5.72308e-05	5.72308e-05	2												6.1095	5.08906	4.88508	4.652	4.39016	4.10159	3.79018	3.46165	3.12324	2.78315
																						3.54168	3.54168	3.54174		5.35157e-05	5.35157e-05	2												5.32106	4.36761	4.18035	3.9677	3.7305	3.4711	3.19353	2.90332	2.60717	2.31233
																						13.0111	13.0111	13.011		-8.01992e-05	-8.01992e-05	2												4.58192	3.71015	3.54168	3.35146	3.14061	2.91164	2.66845	2.41619	2.16085	1.90871
																						12.5937	12.5937	12.5936		-6.65298e-05	-6.65298e-05	2
																						12.108	12.108	12.108		-5.15546e-05	-5.15546e-05	2												1/s	0	0.0439805	0.0549756	0.0687195	0.0858993	0.107374	0.134218	0.167772	0.209715
																						11.5513	11.5513	11.5512		-3.56097e-05	-3.56097e-05	2											1	1	0.0733338	0.0755892	0.0761531	0.0768579	0.0777389	0.0788402	0.0802168	0.0819375	0.0840884
																						10.9234	10.9234	10.9234		-1.91985e-05	-1.91985e-05	2											2	1.25	0.0750004	0.0778197	0.0785245	0.0794055	0.0805068	0.0818834	0.0836041	0.0857551	0.0884437
																						10.2285	10.2285	10.2285		-2.97392e-06	-2.97392e-06	2											3	1.5625	0.0770837	0.0806078	0.0814888	0.0825901	0.0839666	0.0856874	0.0878383	0.090527	0.0938878
																						9.47497	9.47497	9.47498		1.2314e-05	1.2314e-05	2											4	1.95312	0.0796878	0.0840929	0.0851941	0.0865707	0.0882915	0.0904424	0.0931311	0.0964919	0.100693
																						8.67604	8.67604	8.67607		2.59058e-05	2.59058e-05	2											5	2.44141	0.0829429	0.0884492	0.0898258	0.0915466	0.0936975	0.0963862	0.099747	0.103948	0.109199
																						7.84879	7.84879	7.84882		3.71402e-05	3.71402e-05	2											6	3.05176	0.0870117	0.0938947	0.0956154	0.0977664	0.100455	0.103816	0.108017	0.113268	0.119832
																						7.01294	7.01294	7.01298		4.55573e-05	4.55573e-05	2											7	3.8147	0.0920978	0.100702	0.102852	0.105541	0.108902	0.113103	0.118354	0.124918	0.133124
																						6.18906	6.18906	6.18911		5.09677e-05	5.09677e-05	2											8	4.76837	0.0984554	0.10921	0.111899	0.11526	0.119461	0.124712	0.131276	0.139481	0.149738
																						5.39658	5.39658	5.39663		5.34683e-05	5.34683e-05	2											9	5.96046	0.106402	0.119846	0.123207	0.127408	0.132659	0.139223	0.147428	0.157685	0.170505
																						4.652	4.652	4.65205		5.34021e-05	5.34021e-05	2											10	7.45058	0.116336	0.13314	0.137341	0.142593	0.149157	0.157362	0.167618	0.180439	0.196465
																						3.9677	3.9677	3.96775		5.12776e-05	5.12776e-05	2											11	9.31323	0.128753	0.149759	0.15501	0.161574	0.169779	0.180036	0.192856	0.208882	0.228914
																						3.35146	3.35146	3.35151		4.76727e-05	4.76727e-05	2											12	11.6415	0.144275	0.170531	0.177096	0.185301	0.195557	0.208378	0.224403	0.244435	0.269475
																						12.8637	12.8637	12.8636		-7.85932e-05	-7.85932e-05	2											13	14.5519	0.163677	0.196497	0.204703	0.214959	0.22778	0.243805	0.263837	0.288877	0.320178
																						12.4214	12.4214	12.4213		-6.49569e-05	-6.49569e-05	2											14	18.1899	0.187929	0.228955	0.239211	0.252032	0.268058	0.28809	0.31313	0.34443	0.383555
																						11.9095	11.9095	11.9095		-5.01478e-05	-5.01478e-05	2											15	22.7374	0.218245	0.269527	0.282347	0.298373	0.318405	0.343445	0.374745	0.413871	0.462777
																						11.3262	11.3262	11.3261		-3.45402e-05	-3.45402e-05	2
																						10.6727	10.6727	10.6726		-1.86657e-05	-1.86657e-05	2
																						9.95471	9.95471	9.9547		-3.18503e-06	-3.18503e-06	2
																						9.18256	9.18256	9.18257		1.11741e-05	1.11741e-05	2
																						8.37094	8.37094	8.37096		2.3709e-05	2.3709e-05	2
																						7.5381	7.5381	7.53813		3.38457e-05	3.38457e-05	2
																						6.70431	6.70431	6.70435		4.1228e-05	4.1228e-05	2
																						5.88996	5.88996	5.89		4.5767e-05	4.5767e-05	2
																						5.11355	5.11355	5.1136		4.76363e-05	4.76363e-05	2
																						4.39016	4.39016	4.39021		4.72184e-05	4.72184e-05	2
																						3.7305	3.7305	3.73054		4.50215e-05	4.50215e-05	2
																						3.14061	3.14061	3.14065		4.15899e-05	4.15899e-05	2
																						12.684	12.684	12.6839		-7.66577e-05	-7.66577e-05	2
																						12.2126	12.2126	12.2125		-6.30749e-05	-6.30749e-05	2
																						11.6704	11.6704	11.6703		-4.84778e-05	-4.84778e-05	2
																						11.0568	11.0568	11.0568		-3.32802e-05	-3.32802e-05	2
																						10.375	10.375	10.3749		-1.80388e-05	-1.80388e-05	2
																						9.63244	9.63244	9.63244		-3.41305e-06	-3.41305e-06	2
																						8.84149	8.84149	8.8415		9.90563e-06	9.90563e-06	2
																						8.01846	8.01846	8.01848		2.12878e-05	2.12878e-05	2
																						7.18269	7.18269	7.18272		3.02614e-05	3.02614e-05	2
																						6.35474	6.35474	6.35478		3.65829e-05	3.65829e-05	2
																						5.55442	5.55442	5.55446		4.02637e-05	4.02637e-05	2
																						4.79894	4.79894	4.79898		4.15469e-05	4.15469e-05	2
																						4.10159	4.10159	4.10164		4.08425e-05	4.08425e-05	2
																						3.4711	3.4711	3.47114		3.86446e-05	3.86446e-05	2
																						2.91164	2.91164	2.91167		3.54531e-05	3.54531e-05	2
																						12.4663	12.4663	12.4662		-7.43448e-05	-7.43448e-05	2
																						11.9612	11.9612	11.9611		-6.08454e-05	-6.08454e-05	2
																						11.3846	11.3846	11.3846		-4.65179e-05	-4.65179e-05	2
																						10.7376	10.7376	10.7376		-3.18148e-05	-3.18148e-05	2
																						10.0254	10.0254	10.0254		-1.73105e-05	-1.73105e-05	2
																						9.25782	9.25782	9.25781		-3.65027e-06	-3.65027e-06	2
																						8.4492	8.4492	8.44921		8.52809e-06	8.52809e-06	2
																						7.61752	7.61752	7.61754		1.86858e-05	1.86858e-05	2
																						6.78294	6.78294	6.78296		2.64651e-05	2.64651e-05	2
																						5.9659	5.9659	5.96593		3.17385e-05	3.17385e-05	2
																						5.18518	5.18518	5.18521		3.46121e-05	3.46121e-05	2
																						4.45623	4.45623	4.45626		3.5385e-05	3.5385e-05	2
																						3.79018	3.79018	3.79021		3.44783e-05	3.44783e-05	2
																						3.19353	3.19353	3.19356		3.23583e-05	3.23583e-05	2
																						2.66845	2.66845	2.66848		2.94702e-05	2.94702e-05	2
																						12.2045	12.2045	12.2044		-7.16092e-05	-7.16092e-05	2
																						11.6612	11.6612	11.6611		-5.82356e-05	-5.82356e-05	2
																						11.0465	11.0465	11.0464		-4.42491e-05	-4.42491e-05	2
																						10.3636	10.3636	10.3636		-3.01359e-05	-3.01359e-05	2
																						9.62021	9.62021	9.62019		-1.64768e-05	-1.64768e-05	2
																						8.82861	8.82861	8.8286		-3.88525e-06	-3.88525e-06	2
																						8.00522	8.00522	8.00523		7.07411e-06	7.07411e-06	2
																						7.16941	7.16941	7.16943		1.59693e-05	1.59693e-05	2
																						6.34175	6.34175	6.34177		2.25643e-05	2.25643e-05	2
																						5.54202	5.54202	5.54204		2.68444e-05	2.68444e-05	2
																						4.78737	4.78737	4.7874		2.89974e-05	2.89974e-05	2
																						4.09103	4.09103	4.09106		2.93596e-05	2.93596e-05	2
																						3.46165	3.46165	3.46168		2.83455e-05	2.83455e-05	2
																						2.90332	2.90332	2.90335		2.63798e-05	2.63798e-05	2
																						2.41619	2.41619	2.41621		2.3846e-05	2.3846e-05	2
																						11.8923	11.8923	11.8922		-6.8413e-05	-6.8413e-05	2
																						11.3067	11.3067	11.3066		-5.52237e-05	-5.52237e-05	2
																						10.6511	10.6511	10.651		-4.16647e-05	-4.16647e-05	2
																						9.93121	9.93121	9.93119		-2.82463e-05	-2.82463e-05	2
																						9.15758	9.15758	9.15757		-1.55387e-05	-1.55387e-05	2
																						8.345	8.345	8.345		-4.10292e-06	-4.10292e-06	2
																						7.51181	7.51181	7.51182		5.58917e-06	5.58917e-06	2
																						6.67834	6.67834	6.67835		1.32244e-05	1.32244e-05	2
																						5.86491	5.86491	5.86493		1.86892e-05	1.86892e-05	2
																						5.08995	5.08995	5.08998		2.20699e-05	2.20699e-05	2
																						4.36843	4.36843	4.36846		2.36161e-05	2.36161e-05	2
																						3.71089	3.71089	3.71091		2.36803e-05	2.36803e-05	2
																						3.12324	3.12324	3.12327		2.26525e-05	2.26525e-05	2
																						2.60717	2.60717	2.60719		2.0905e-05	2.0905e-05	2
																						2.16085	2.16085	2.16087		1.87567e-05	1.87567e-05	2
																						11.5238	11.5238	11.5238		-6.47327e-05	-6.47327e-05	2
																						10.8928	10.8928	10.8927		-5.18054e-05	-5.18054e-05	2
																						10.1949	10.1949	10.1948		-3.87756e-05	-3.87756e-05	2
																						9.43896	9.43896	9.43893		-2.61621e-05	-2.61621e-05	2
																						8.63832	8.63832	8.63831		-1.45034e-05	-1.45034e-05	2
																						7.81022	7.81022	7.81022		-4.28553e-06	-4.28553e-06	2
																						6.97447	6.97447	6.97448		4.12874e-06	4.12874e-06	2
																						6.15164	6.15164	6.15165		1.05503e-05	1.05503e-05	2
																						5.36103	5.36103	5.36105		1.49794e-05	1.49794e-05	2
																						4.61899	4.61899	4.61901		1.75841e-05	1.75841e-05	2
																						3.9377	3.9377	3.93772		1.86521e-05	1.86521e-05	2
																						3.32472	3.32472	3.32474		1.85301e-05	1.85301e-05	2
																						2.78315	2.78315	2.78317		1.7569e-05	1.7569e-05	2
																						2.31233	2.31233	2.31234		1.60828e-05	1.60828e-05	2
																						1.90871	1.90871	1.90872		1.4327e-05	1.4327e-05	2
																						11.0942	11.0942	11.0941		-6.05671e-05	-6.05671e-05	2
																						10.4161	10.4161	10.4161		-4.80006e-05	-4.80006e-05	2
																						9.67682	9.67682	9.67678		-3.56144e-05	-3.56144e-05	2
																						8.88826	8.88826	8.88823		-2.39149e-05	-2.39149e-05	2
																						8.06658	8.06658	8.06656		-1.33848e-05	-1.33848e-05	2
																						7.23098	7.23098	7.23098		-4.41449e-06	-4.41449e-06	2
																						6.40203	6.40203	6.40203		2.7527e-06	2.7527e-06	2
																						5.59961	5.59961	5.59961		8.0474e-06	8.0474e-06	2
																						4.84113	4.84113	4.84114		1.15662e-05	1.15662e-05	2
																						4.14014	4.14014	4.14016		1.35341e-05	1.35341e-05	2
																						3.50563	3.50563	3.50565		1.42518e-05	1.42518e-05	2
																						2.94202	2.94202	2.94204		1.40418e-05	1.40418e-05	2
																						2.44971	2.44971	2.44972		1.32058e-05	1.32058e-05	2
																						2.02594	2.02594	2.02595		1.1999e-05	1.1999e-05	2
																						1.66575	1.66575	1.66576		1.06188e-05	1.06188e-05	2
																						10.6001	10.6001	10.6001		-5.59452e-05	-5.59452e-05	2
																						9.87592	9.87592	9.87587		-4.38587e-05	-4.38587e-05	2
																						9.09886	9.09886	9.09883		-3.22382e-05	-3.22382e-05	2
																						8.2841	8.2841	8.28408		-2.15524e-05	-2.15524e-05	2
																						7.45019	7.45019	7.45018		-1.22041e-05	-1.22041e-05	2
																						6.61751	6.61751	6.6175		-4.47302e-06	-4.47302e-06	2
																						5.80632	5.80632	5.80632		1.51768e-06	1.51768e-06	2
																						5.03484	5.03484	5.03485		5.80426e-06	5.80426e-06	2
																						4.31773	4.31773	4.31773		8.55531e-06	8.55531e-06	2
																						3.66518	3.66518	3.66519		1.00259e-05	1.00259e-05	2
																						3.0828	3.0828	3.08281		1.05074e-05	1.05074e-05	2
																						2.57196	2.57196	2.57197		1.02844e-05	1.02844e-05	2
																						2.13063	2.13063	2.13064		9.60621e-06	9.60621e-06	2
																						1.75434	1.75434	1.75435		8.67246e-06	8.67246e-06	2
																						1.43709	1.43709	1.4371		7.63096e-06	7.63096e-06	2
																						10.0412	10.0412	10.0411		-5.09325e-05	-5.09325e-05	2
																						9.27467	9.27467	9.27463		-3.94613e-05	-3.94613e-05	2
																						8.46676	8.46676	8.46673		-2.87273e-05	-2.87273e-05	2
																						7.63536	7.63536	7.63534		-1.91352e-05	-1.91352e-05	2
																						6.80063	6.80063	6.80062		-1.09881e-05	-1.09881e-05	2
																						5.98301	5.98301	5.98301		-4.44908e-06	-4.44908e-06	2
																						5.20134	5.20134	5.20134		4.6901e-07	4.6901e-07	2
																						4.47115	4.47115	4.47115		3.88563e-06	3.88563e-06	2
																						3.80368	3.80368	3.80368		6.0137e-06	6.0137e-06	2
																						3.20551	3.20551	3.20552		7.11326e-06	7.11326e-06	2
																						2.67891	2.67891	2.67891		7.44948e-06	7.44948e-06	2
																						2.22251	2.22251	2.22252		7.26232e-06	7.26232e-06	2
																						1.83231	1.83231	1.83231		6.74993e-06	6.74993e-06	2
																						1.50255	1.50255	1.50256		6.06368e-06	6.06368e-06	2
																						1.22662	1.22662	1.22662		5.31116e-06	5.31116e-06	2
																						9.42029	9.42029	9.42024		-4.56333e-05	-4.56333e-05	2
																						8.61878	8.61878	8.61875		-3.49196e-05	-3.49196e-05	2
																						7.79026	7.79026	7.79024		-2.51802e-05	-2.51802e-05	2
																						6.95458	6.95458	6.95457		-1.6732e-05	-1.6732e-05	2
																						6.1323	6.1323	6.13229		-9.76728e-06	-9.76728e-06	2
																						5.34268	5.34268	5.34268		-4.33785e-06	-4.33785e-06	2
																						4.60197	4.60197	4.60197		-3.65644e-07	-3.65644e-07	2
																						3.92224	3.92224	3.92224		2.32476e-06	2.32476e-06	2
																						3.31094	3.31094	3.31095		3.96389e-06	3.96389e-06	2
																						2.77109	2.77109	2.77109		4.79693e-06	4.79693e-06	2
																						2.30192	2.30192	2.30193		5.05274e-06	5.05274e-06	2
																						1.89985	1.89985	1.89985		4.92557e-06	4.92557e-06	2
																						1.55938	1.55938	1.55938		4.56789e-06	4.56789e-06	2
																						1.27399	1.27399	1.274		4.09144e-06	4.09144e-06	2
																						1.03681	1.03681	1.03681		3.57289e-06	3.57289e-06	2
																						8.74439	8.74439	8.74435		-4.01869e-05	-4.01869e-05	2
																						7.91878	7.91878	7.91875		-3.03665e-05	-3.03665e-05	2
																						7.08286	7.08286	7.08284		-2.17036e-05	-2.17036e-05	2
																						6.25721	6.25721	6.25719		-1.44116e-05	-1.44116e-05	2
																						5.46141	5.46141	5.4614		-8.57269e-06	-8.57269e-06	2
																						4.71227	4.71227	4.71226		-4.14289e-06	-4.14289e-06	2
																						4.02255	4.02255	4.02255		-9.79219e-07	-9.79219e-07	2
																						3.40042	3.40042	3.40042		1.12218e-06	1.12218e-06	2
																						2.84953	2.84953	2.84953		2.38731e-06	2.38731e-06	2
																						2.36966	2.36966	2.36966		3.03343e-06	3.03343e-06	2
																						1.95758	1.95758	1.95758		3.24947e-06	3.24947e-06	2
																						1.60803	1.60803	1.60804		3.18734e-06	3.18734e-06	2
																						1.31461	1.31461	1.31461		2.96129e-06	2.96129e-06	2
																						1.07045	1.07045	1.07045		2.65221e-06	2.65221e-06	2
																						0.868761	0.868761	0.868764		2.314e-06	2.314e-06	2
																						8.02469	8.02469	8.02466		-3.47567e-05	-3.47567e-05	2
																						7.18894	7.18894	7.18891		-2.59425e-05	-2.59425e-05	2
																						6.36086	6.36086	6.36084		-1.84003e-05	-1.84003e-05	2
																						5.56026	5.56026	5.56025		-1.22358e-05	-1.22358e-05	2
																						4.80439	4.80439	4.80438		-7.4328e-06	-7.4328e-06	2
																						4.10657	4.10657	4.10657		-3.87571e-06	-3.87571e-06	2
																						3.47556	3.47556	3.47556		-1.38409e-06	-1.38409e-06	2
																						2.91556	2.91556	2.91556		2.50509e-07	2.50509e-07	2
																						2.42678	2.42678	2.42679		1.23401e-06	1.23401e-06	2
																						2.00635	2.00635	2.00635		1.74951e-06	1.74951e-06	2
																						1.6492	1.6492	1.6492		1.94732e-06	1.94732e-06	2
																						1.34902	1.34902	1.34902		1.94298e-06	1.94298e-06	2
																						1.09898	1.09898	1.09899		1.82042e-06	1.82042e-06	2
																						0.892261	0.892261	0.892263		1.63747e-06	1.63747e-06	2
																						0.722403	0.722403	0.722405		1.43183e-06	1.43183e-06	2
[truncated: 54 more columns]

## Sheet: Uncompetitive
																							Calculated values
		No Inhibitor	[I]1	[I]2	[I]3	[I]4	[I]5	[I]6	[I]7	[I]8	[I]9	[I]10	[I]11	[I]12	[I]13	[I]14	[I]15						No Inhibitor	[I]1	[I]2	[I]3	[I]4	[I]5	[I]6	[I]7	[I]8	[I]9	[I]10	[I]11	[I]12	[I]13	[I]14	[I]15
		0	0.0439805	0.0549756	0.0687195	0.0858993	0.107374	0.134218	0.167772	0.209715	0.262144	0.32768	0.4096	0.512	0.64	0.8	1		Km	Vmax	Ki		0	0.0439805	0.0549756	0.0687195	0.0858993	0.107374	0.134218	0.167772	0.209715	0.262144	0.32768	0.4096	0.512	0.64	0.8	1
[S]1	1	13.6364	13.2295	13.1315	13.0111	12.8637	12.684	12.4663	12.2045	11.8923	11.5238	11.0942	10.6001	10.0412	9.42029	8.74439	8.02469		0.265962	19.4234	0.455698		15.3428	14.256	14.0079	13.7097	13.3544	12.9353	12.447	11.8861	11.2523	10.5492	9.78494	8.97238	8.12862	7.2736	6.42839	5.61307		15.3428	14.256	14.0079	13.7097	13.3544	12.9353	12.447	11.8861	11.2523	10.5492
[S]2	0.8	13.3333	12.8503	12.7349	12.5937	12.4214	12.2126	11.9612	11.6612	11.3067	10.8928	10.4161	9.87592	9.27467	8.61878	7.91878	7.18894						14.5772	13.5927	13.367	13.0952	12.7706	12.3868	11.9383	11.4214	10.835	10.1815	9.4678	8.70501	7.90855	7.0969	6.28997	5.50725		14.5772	13.5927	13.367	13.0952	12.7706	12.3868	11.9383	11.4214	10.835	10.1815
[S]3	0.64	12.973	12.4058	12.2717	12.108	11.9095	11.6704	11.3846	11.0465	10.6511	10.1949	9.67682	9.09886	8.46676	7.79026	7.08286	6.36086						13.7213	12.8455	12.6438	12.4003	12.1089	11.7633	11.3581	10.8892	10.3549	9.75648	9.09917	8.39241	7.64968	6.88773	6.12512	5.38045		13.7213	12.8455	12.6438	12.4003	12.1089	11.7633	11.3581	10.8892	10.3549	9.75648
[S]4	0.512	12.549	11.8917	11.7379	11.5513	11.3262	11.0568	10.7376	10.3636	9.93121	9.43896	8.88826	8.2841	7.63536	6.95458	6.25721	5.56026						12.7831	12.0197	11.8429	11.629	11.3723	11.067	10.7076	10.2899	9.81148	9.27259	8.67687	8.03186	7.34899	6.643	5.93081	5.22994		12.7831	12.0197	11.8429	11.629	11.3723	11.067	10.7076	10.2899	9.81148	9.27259
[S]5	0.4096	12.0565	11.3059	11.1327	10.9234	10.6727	10.375	10.0254	9.62021	9.15758	8.63832	8.06658	7.45019	6.80063	6.1323	5.46141	4.80439						11.7766	11.1256	10.9739	10.7901	10.5687	10.3045	9.99223	9.62754	9.20748	8.73128	8.2011	7.62253	7.00481	6.3605	5.70461	5.05324		11.7766	11.1256	10.9739	10.7901	10.5687	10.3045	9.99223	9.62754	9.20748	8.73128
[S]6	0.32768	11.4927	10.6502	10.4586	10.2285	9.95471	9.63244	9.25782	8.82861	8.345	7.81022	7.23098	6.61751	5.98301	5.34268	4.71227	4.10657			Sum R2	225.482		10.7214	10.1791	10.052	9.89753	9.71098	9.48745	9.2221	8.91058	8.54958	8.13748	7.67505	7.16602	6.61741	6.03946	5.44501	4.84848		10.7214	10.1791	10.052	9.89753	9.71098	9.48745	9.2221	8.91058	8.54958	8.13748
[S]7	0.262144	10.858	9.93032	9.72265	9.47497	9.18256	8.84149	8.4492	8.00522	7.51181	6.97447	6.40203	5.80632	5.20134	4.60197	4.02255	3.47556			Sum residuals %	39.4152		9.6415	9.20072	9.09675	8.97005	8.81655	8.63191	8.4117	8.15176	7.84858	7.49991	7.10534	6.66692	6.18952	5.68102	5.15195	4.61474		9.6415	9.20072	9.09675	8.97005	8.81655	8.63191	8.4117	8.15176	7.84858	7.49991
[S]8	0.209715	10.1568	9.15663	8.93662	8.67604	8.37094	8.01846	7.61752	7.16941	6.67834	6.15164	5.59961	5.03484	4.47115	3.92224	3.40042	2.91556						8.56335	8.21385	8.13088	8.02951	7.90629	7.75748	7.57917	7.36749	7.11895	6.83091	6.50205	6.13298	5.72666	5.28868	4.82719	4.35245		8.56335	8.21385	8.13088	8.02951	7.90629	7.75748	7.57917	7.36749	7.11895	6.83091
[S]9	0.167772	9.39822	8.34402	8.11641	7.84879	7.5381	7.18269	6.78294	6.34175	5.86491	5.36103	4.84113	4.31773	3.80368	3.31094	2.84953	2.42678						7.51315	7.24277	7.17818	7.09906	7.00257	6.88559	6.74474	6.57659	6.37783	6.14565	5.87818	5.57488	5.23711	4.8684	4.47462	4.06374		7.51315	7.24277	7.17818	7.09906	7.00257	6.88559	6.74474	6.57659	6.37783	6.14565
[S]10	0.134218	8.5957	7.51082	7.28108	7.01294	6.70431	6.35474	5.9659	5.54202	5.08995	4.61899	4.14014	3.66518	3.20551	2.77109	2.36966	2.00635						6.51449	6.31024	6.26116	6.20087	6.12713	6.03738	5.92882	5.7985	5.64343	5.46088	5.24866	5.00551	4.73151	4.4285	4.10026	3.75259		6.51449	6.31024	6.26116	6.20087	6.12713	6.03738	5.92882	5.7985	5.64343	5.46088
[S]11	0.107374	7.7667	6.67735	6.45114	6.18906	5.88996	5.55442	5.18518	4.78737	4.36843	3.9377	3.50563	3.0828	2.67891	2.30192	1.95758	1.6492						5.58632	5.43544	5.39899	5.3541	5.29904	5.23177	5.15006	5.05144	4.93335	4.79328	4.629	4.43883	4.22201	3.97907	3.71207	3.4248		5.58632	5.43544	5.39899	5.3541	5.29904	5.23177	5.15006	5.05144	4.93335	4.79328
[S]12	0.0858993	6.93112	5.86396	5.64661	5.39658	5.11355	4.79894	4.45623	4.09103	3.71089	3.32472	2.94202	2.57196	2.22251	1.89985	1.60803	1.34902						4.74181	4.63266	4.60615	4.57344	4.5332	4.48389	4.42373	4.35077	4.26288	4.15789	4.03371	3.88854	3.72114	3.53112	3.31925	3.08767		4.74181	4.63266	4.60615	4.57344	4.5332	4.48389	4.42373	4.35077	4.26288	4.15789
[S]13	0.0687195	6.1095	5.08906	4.88508	4.652	4.39016	4.10159	3.79018	3.46165	3.12324	2.78315	2.44971	2.13063	1.83231	1.55938	1.31461	1.09898						3.98817	3.91068	3.89177	3.8684	3.83957	3.80413	3.76074	3.70788	3.64385	3.56687	3.47509	3.36681	3.24058	3.09552	2.93148	2.74937		3.98817	3.91068	3.89177	3.8684	3.83957	3.80413	3.76074	3.70788	3.64385	3.56687
[S]14	0.0549756	5.32106	4.36761	4.18035	3.9677	3.7305	3.4711	3.19353	2.90332	2.60717	2.31233	2.02594	1.75434	1.50255	1.27399	1.07045	0.892261						3.32717	3.27306	3.25981	3.24339	3.2231	3.19809	3.16737	3.12979	3.08405	3.02872	2.96229	2.88324	2.79017	2.68196	2.55795	2.41818		3.32717	3.27306	3.25981	3.24339	3.2231	3.19809	3.16737	3.12979	3.08405	3.02872
[S]15	0.0439805	4.58192	3.71015	3.54168	3.35146	3.14061	2.91164	2.66845	2.41619	2.16085	1.90871	1.66575	1.43709	1.22662	1.03681	0.868761	0.722403						2.75616	2.71893	2.70977	2.69842	2.68436	2.66699	2.64559	2.61932	2.58721	2.54816	2.50097	2.44439	2.37717	2.29817	2.2065	2.10171		2.75616	2.71893	2.70977	2.69842	2.68436	2.66699	2.64559	2.61932	2.58721	2.54816
	1	1	1	1	1	1	1	1	1	1	1	1	1	1	1	1	1																					1	1	15.3428	14.256	14.0079	13.7097	13.3544	12.9353	12.447	11.8861	11.2523	10.5492
	1	1	1	1	1	1	1	1	1	1	1	1	1	1	1	1	1					13.6364	13.6364	15.3428		1.70646	1.70646	3										0.8	0.8	14.5772	13.5927	13.367	13.0952	12.7706	12.3868	11.9383	11.4214	10.835	10.1815
	1	1	1	1	1	1	1	1	1	1	1	1	1	1	1	1	1					13.3333	13.3333	14.5772		1.24387	1.24387	3										0.64	0.64	13.7213	12.8455	12.6438	12.4003	12.1089	11.7633	11.3581	10.8892	10.3549	9.75648
	1	1	1	1	1	1	1	1	1	1	1	1	1	1	1	1	1					12.973	12.973	13.7213		0.748348	0.748348	3										0.512	0.512	12.7831	12.0197	11.8429	11.629	11.3723	11.067	10.7076	10.2899	9.81148	9.27259
	1	1	1	1	1	1	1	1	1	1	1	1	1	1	1	1	1					12.549	12.549	12.7831		0.234119	0.234119	3										0.4096	0.4096	11.7766	11.1256	10.9739	10.7901	10.5687	10.3045	9.99223	9.62754	9.20748	8.73128
	1	1	1	1	1	1	1	1	1	1	1	1	1	1	1	1	1					12.0565	12.0565	11.7766		-0.279895	-0.279895	3										0.32768	0.32768	10.7214	10.1791	10.052	9.89753	9.71098	9.48745	9.2221	8.91058	8.54958	8.13748
	1	1	1	1	1	1	1	1	1	1	1	1	1	1	1	1	1					11.4927	11.4927	10.7214		-0.771311	-0.771311	3										0.262144	0.262144	9.6415	9.20072	9.09675	8.97005	8.81655	8.63191	8.4117	8.15176	7.84858	7.49991
	1	1	1	1	1	1	1	1	1	1	1	1	1	1	1	1	1					10.858	10.858	9.6415		-1.2165	-1.2165	3										0.209715	0.209715	8.56335	8.21385	8.13088	8.02951	7.90629	7.75748	7.57917	7.36749	7.11895	6.83091
	1	1	1	1	1	1	1	1	1	1	1	1	1	1	1	1	1					10.1568	10.1568	8.56335		-1.59349	-1.59349	3										0.167772	0.167772	7.51315	7.24277	7.17818	7.09906	7.00257	6.88559	6.74474	6.57659	6.37783	6.14565
	1	1	1	1	1	1	1	1	1	1	1	1	1	1	1	1	1					9.39822	9.39822	7.51315		-1.88507	-1.88507	3										0.134218	0.134218	6.51449	6.31024	6.26116	6.20087	6.12713	6.03738	5.92882	5.7985	5.64343	5.46088
	1	1	1	1	1	1	1	1	1	1	1	1	1	1	1	1	1					8.5957	8.5957	6.51449		-2.08121	-2.08121	3										0.107374	0.107374	5.58632	5.43544	5.39899	5.3541	5.29904	5.23177	5.15006	5.05144	4.93335	4.79328
	1	1	1	1	1	1	1	1	1	1	1	1	1	1	1	1	1					7.7667	7.7667	5.58632		-2.18038	-2.18038	3										0.0858993	0.0858993	4.74181	4.63266	4.60615	4.57344	4.5332	4.48389	4.42373	4.35077	4.26288	4.15789
	1	1	1	1	1	1	1	1	1	1	1	1	1	1	1	1	1					6.93112	6.93112	4.74181		-2.18931	-2.18931	3										0.0687195	0.0687195	3.98817	3.91068	3.89177	3.8684	3.83957	3.80413	3.76074	3.70788	3.64385	3.56687
	1	1	1	1	1	1	1	1	1	1	1	1	1	1	1	1	1					6.1095	6.1095	3.98817		-2.12133	-2.12133	3										0.0549756	0.0549756	3.32717	3.27306	3.25981	3.24339	3.2231	3.19809	3.16737	3.12979	3.08405	3.02872
	1	1	1	1	1	1	1	1	1	1	1	1	1	1	1	1	1					5.32106	5.32106	3.32717		-1.99388	-1.99388	3										0.0439805	0.0439805	2.75616	2.71893	2.70977	2.69842	2.68436	2.66699	2.64559	2.61932	2.58721	2.54816
																						4.58192	4.58192	2.75616		-1.82576	-1.82576	3
																						13.2295	13.2295	14.256		1.02651	1.02651	3											1	0.0651771	0.0701459	0.0713881	0.0729409	0.0748819	0.0773081	0.0803408	0.0841317	0.0888704	0.0947937
																						12.8503	12.8503	13.5927		0.74237	0.74237	3											1.25	0.0686003	0.0735691	0.0748113	0.0763641	0.0783051	0.0807313	0.083764	0.0875549	0.0922936	0.098217
																						12.4058	12.4058	12.8455		0.439715	0.439715	3											1.5625	0.0728793	0.0778481	0.0790904	0.0806431	0.0825841	0.0850103	0.088043	0.091834	0.0965726	0.102496
																						11.8917	11.8917	12.0197		0.128025	0.128025	3											1.95312	0.078228	0.0831969	0.0844391	0.0859919	0.0879328	0.090359	0.0933918	0.0971827	0.101921	0.107845
																						11.3059	11.3059	11.1256		-0.180349	-0.180349	3											2.44141	0.084914	0.0898829	0.0911251	0.0926778	0.0946188	0.097045	0.100078	0.103869	0.108607	0.114531
																						10.6502	10.6502	10.1791		-0.47111	-0.47111	3											3.05176	0.0932715	0.0982403	0.0994825	0.101035	0.102976	0.105402	0.108435	0.112226	0.116965	0.122888
																						9.93032	9.93032	9.20072		-0.729598	-0.729598	3											3.8147	0.103718	0.108687	0.109929	0.111482	0.113423	0.115849	0.118882	0.122673	0.127412	0.133335
																						9.15663	9.15663	8.21385		-0.942787	-0.942787	3											4.76837	0.116777	0.121746	0.122988	0.124541	0.126482	0.128908	0.131941	0.135731	0.14047	0.146393
																						8.34402	8.34402	7.24277		-1.10125	-1.10125	3											5.96046	0.1331	0.138069	0.139311	0.140864	0.142805	0.145231	0.148264	0.152055	0.156793	0.162717
																						7.51082	7.51082	6.31024		-1.20058	-1.20058	3											7.45058	0.153504	0.158473	0.159715	0.161268	0.163209	0.165635	0.168668	0.172459	0.177197	0.183121
																						6.67735	6.67735	5.43544		-1.24191	-1.24191	3											9.31323	0.179009	0.183978	0.18522	0.186773	0.188714	0.19114	0.194172	0.197963	0.202702	0.208625
																						5.86396	5.86396	4.63266		-1.2313	-1.2313	3											11.6415	0.21089	0.215859	0.217101	0.218654	0.220595	0.223021	0.226054	0.229845	0.234583	0.240507
																						5.08906	5.08906	3.91068		-1.17838	-1.17838	3											14.5519	0.250741	0.25571	0.256952	0.258505	0.260446	0.262872	0.265905	0.269696	0.274435	0.280358
																						4.36761	4.36761	3.27306		-1.09455	-1.09455	3											18.1899	0.300556	0.305524	0.306767	0.308319	0.31026	0.312687	0.315719	0.31951	0.324249	0.330172
																						3.71015	3.71015	2.71893		-0.99122	-0.99122	3											22.7374	0.362823	0.367792	0.369034	0.370587	0.372528	0.374954	0.377987	0.381778	0.386517	0.39244
																						13.1315	13.1315	14.0079		0.876402	0.876402	3
																						12.7349	12.7349	13.367		0.63201	0.63201	3												13.6364	13.2295	13.1315	13.0111	12.8637	12.684	12.4663	12.2045	11.8923	11.5238
																						12.2717	12.2717	12.6438		0.372086	0.372086	3												13.3333	12.8503	12.7349	12.5937	12.4214	12.2126	11.9612	11.6612	11.3067	10.8928
																						11.7379	11.7379	11.8429		0.104918	0.104918	3												12.973	12.4058	12.2717	12.108	11.9095	11.6704	11.3846	11.0465	10.6511	10.1949
																						11.1327	11.1327	10.9739		-0.158747	-0.158747	3												12.549	11.8917	11.7379	11.5513	11.3262	11.0568	10.7376	10.3636	9.93121	9.43896
																						10.4586	10.4586	10.052		-0.406547	-0.406547	3												12.0565	11.3059	11.1327	10.9234	10.6727	10.375	10.0254	9.62021	9.15758	8.63832
																						9.72265	9.72265	9.09675		-0.625898	-0.625898	3												11.4927	10.6502	10.4586	10.2285	9.95471	9.63244	9.25782	8.82861	8.345	7.81022
																						8.93662	8.93662	8.13088		-0.805738	-0.805738	3												10.858	9.93032	9.72265	9.47497	9.18256	8.84149	8.4492	8.00522	7.51181	6.97447
																						8.11641	8.11641	7.17818		-0.938224	-0.938224	3												10.1568	9.15663	8.93662	8.67604	8.37094	8.01846	7.61752	7.16941	6.67834	6.15164
																						7.28108	7.28108	6.26116		-1.01992	-1.01992	3												9.39822	8.34402	8.11641	7.84879	7.5381	7.18269	6.78294	6.34175	5.86491	5.36103
																						6.45114	6.45114	5.39899		-1.05215	-1.05215	3												8.5957	7.51082	7.28108	7.01294	6.70431	6.35474	5.9659	5.54202	5.08995	4.61899
																						5.64661	5.64661	4.60615		-1.04046	-1.04046	3												7.7667	6.67735	6.45114	6.18906	5.88996	5.55442	5.18518	4.78737	4.36843	3.9377
																						4.88508	4.88508	3.89177		-0.993305	-0.993305	3												6.93112	5.86396	5.64661	5.39658	5.11355	4.79894	4.45623	4.09103	3.71089	3.32472
																						4.18035	4.18035	3.25981		-0.920539	-0.920539	3												6.1095	5.08906	4.88508	4.652	4.39016	4.10159	3.79018	3.46165	3.12324	2.78315
																						3.54168	3.54168	2.70977		-0.831909	-0.831909	3												5.32106	4.36761	4.18035	3.9677	3.7305	3.4711	3.19353	2.90332	2.60717	2.31233
																						13.0111	13.0111	13.7097		0.698623	0.698623	3												4.58192	3.71015	3.54168	3.35146	3.14061	2.91164	2.66845	2.41619	2.16085	1.90871
																						12.5937	12.5937	13.0952		0.501507	0.501507	3
																						12.108	12.108	12.4003		0.292267	0.292267	3												1/s	0	0.0439805	0.0549756	0.0687195	0.0858993	0.107374	0.134218	0.167772	0.209715
																						11.5513	11.5513	11.629		0.07772	0.07772	3											1	1	0.0651771	0.0701459	0.0713881	0.0729409	0.0748819	0.0773081	0.0803408	0.0841317	0.0888704
																						10.9234	10.9234	10.7901		-0.133356	-0.133356	3											2	1.25	0.0686003	0.0735691	0.0748113	0.0763641	0.0783051	0.0807313	0.083764	0.0875549	0.0922936
																						10.2285	10.2285	9.89753		-0.330937	-0.330937	3											3	1.5625	0.0728793	0.0778481	0.0790904	0.0806431	0.0825841	0.0850103	0.088043	0.091834	0.0965726
																						9.47497	9.47497	8.97005		-0.504917	-0.504917	3											4	1.95312	0.078228	0.0831969	0.0844391	0.0859919	0.0879328	0.090359	0.0933918	0.0971827	0.101921
																						8.67604	8.67604	8.02951		-0.646534	-0.646534	3											5	2.44141	0.084914	0.0898829	0.0911251	0.0926778	0.0946188	0.097045	0.100078	0.103869	0.108607
																						7.84879	7.84879	7.09906		-0.749728	-0.749728	3											6	3.05176	0.0932715	0.0982403	0.0994825	0.101035	0.102976	0.105402	0.108435	0.112226	0.116965
																						7.01294	7.01294	6.20087		-0.812066	-0.812066	3											7	3.8147	0.103718	0.108687	0.109929	0.111482	0.113423	0.115849	0.118882	0.122673	0.127412
																						6.18906	6.18906	5.3541		-0.834958	-0.834958	3											8	4.76837	0.116777	0.121746	0.122988	0.124541	0.126482	0.128908	0.131941	0.135731	0.14047
																						5.39658	5.39658	4.57344		-0.823139	-0.823139	3											9	5.96046	0.1331	0.138069	0.139311	0.140864	0.142805	0.145231	0.148264	0.152055	0.156793
																						4.652	4.652	3.8684		-0.783601	-0.783601	3											10	7.45058	0.153504	0.158473	0.159715	0.161268	0.163209	0.165635	0.168668	0.172459	0.177197
																						3.9677	3.9677	3.24339		-0.72431	-0.72431	3											11	9.31323	0.179009	0.183978	0.18522	0.186773	0.188714	0.19114	0.194172	0.197963	0.202702
																						3.35146	3.35146	2.69842		-0.653041	-0.653041	3											12	11.6415	0.21089	0.215859	0.217101	0.218654	0.220595	0.223021	0.226054	0.229845	0.234583
																						12.8637	12.8637	13.3544		0.490719	0.490719	3											13	14.5519	0.250741	0.25571	0.256952	0.258505	0.260446	0.262872	0.265905	0.269696	0.274435
																						12.4214	12.4214	12.7706		0.349189	0.349189	3											14	18.1899	0.300556	0.305524	0.306767	0.308319	0.31026	0.312687	0.315719	0.31951	0.324249
																						11.9095	11.9095	12.1089		0.199331	0.199331	3											15	22.7374	0.362823	0.367792	0.369034	0.370587	0.372528	0.374954	0.377987	0.381778	0.386517
																						11.3262	11.3262	11.3723		0.046158	0.046158	3
																						10.6727	10.6727	10.5687		-0.103938	-0.103938	3
																						9.95471	9.95471	9.71098		-0.243729	-0.243729	3
																						9.18256	9.18256	8.81655		-0.366011	-0.366011	3
																						8.37094	8.37094	7.90629		-0.464647	-0.464647	3
																						7.5381	7.5381	7.00257		-0.535525	-0.535525	3
																						6.70431	6.70431	6.12713		-0.577186	-0.577186	3
																						5.88996	5.88996	5.29904		-0.590922	-0.590922	3
																						5.11355	5.11355	4.5332		-0.580347	-0.580347	3
																						4.39016	4.39016	3.83957		-0.550596	-0.550596	3
																						3.7305	3.7305	3.2231		-0.507397	-0.507397	3
																						3.14061	3.14061	2.68436		-0.456251	-0.456251	3
																						12.684	12.684	12.9353		0.251298	0.251298	3
																						12.2126	12.2126	12.3868		0.174222	0.174222	3
																						11.6704	11.6704	11.7633		0.0929066	0.0929066	3
																						11.0568	11.0568	11.067		0.0101665	0.0101665	3
																						10.375	10.375	10.3045		-0.0704539	-0.0704539	3
																						9.63244	9.63244	9.48745		-0.144998	-0.144998	3
																						8.84149	8.84149	8.63191		-0.209583	-0.209583	3
																						8.01846	8.01846	7.75748		-0.260976	-0.260976	3
																						7.18269	7.18269	6.88559		-0.297103	-0.297103	3
																						6.35474	6.35474	6.03738		-0.317363	-0.317363	3
																						5.55442	5.55442	5.23177		-0.322643	-0.322643	3
																						4.79894	4.79894	4.48389		-0.315053	-0.315053	3
																						4.10159	4.10159	3.80413		-0.297466	-0.297466	3
																						3.4711	3.4711	3.19809		-0.273012	-0.273012	3
																						2.91164	2.91164	2.66699		-0.244646	-0.244646	3
																						12.4663	12.4663	12.447		-0.0193195	-0.0193195	3
																						11.9612	11.9612	11.9383		-0.0228918	-0.0228918	3
																						11.3846	11.3846	11.3581		-0.0265165	-0.0265165	3
																						10.7376	10.7376	10.7076		-0.0300091	-0.0300091	3
																						10.0254	10.0254	9.99223		-0.0331521	-0.0331521	3
																						9.25782	9.25782	9.2221		-0.0357173	-0.0357173	3
																						8.4492	8.4492	8.4117		-0.0374987	-0.0374987	3
																						7.61752	7.61752	7.57917		-0.038347	-0.038347	3
																						6.78294	6.78294	6.74474		-0.0381969	-0.0381969	3
																						5.9659	5.9659	5.92882		-0.0370802	-0.0370802	3
																						5.18518	5.18518	5.15006		-0.0351181	-0.0351181	3
																						4.45623	4.45623	4.42373		-0.0324978	-0.0324978	3
																						3.79018	3.79018	3.76074		-0.0294392	-0.0294392	3
																						3.19353	3.19353	3.16737		-0.0261613	-0.0261613	3
																						2.66845	2.66845	2.64559		-0.0228565	-0.0228565	3
																						12.2045	12.2045	11.8861		-0.318373	-0.318373	3
																						11.6612	11.6612	11.4214		-0.239779	-0.239779	3
																						11.0465	11.0465	10.8892		-0.157257	-0.157257	3
																						10.3636	10.3636	10.2899		-0.0737017	-0.0737017	3
																						9.62021	9.62021	9.62754		0.00733094	0.00733094	3
																						8.82861	8.82861	8.91058		0.0819718	0.0819718	3
																						8.00522	8.00522	8.15176		0.146537	0.146537	3
																						7.16941	7.16941	7.36749		0.198077	0.198077	3
																						6.34175	6.34175	6.57659		0.234834	0.234834	3
																						5.54202	5.54202	5.7985		0.25648	0.25648	3
																						4.78737	4.78737	5.05144		0.26407	0.26407	3
																						4.09103	4.09103	4.35077		0.259735	0.259735	3
																						3.46165	3.46165	3.70788		0.246231	0.246231	3
																						2.90332	2.90332	3.12979		0.226468	0.226468	3
																						2.41619	2.41619	2.61932		0.203132	0.203132	3
																						11.8923	11.8923	11.2523		-0.639969	-0.639969	3
																						11.3067	11.3067	10.835		-0.471696	-0.471696	3
																						10.6511	10.6511	10.3549		-0.296152	-0.296152	3
																						9.93121	9.93121	9.81148		-0.119731	-0.119731	3
																						9.15758	9.15758	9.20748		0.0498965	0.0498965	3
																						8.345	8.345	8.54958		0.20458	0.20458	3
																						7.51181	7.51181	7.84858		0.336763	0.336763	3
																						6.67834	6.67834	7.11895		0.440614	0.440614	3
																						5.86491	5.86491	6.37783		0.512917	0.512917	3
																						5.08995	5.08995	5.64343		0.553476	0.553476	3
																						4.36843	4.36843	4.93335		0.564916	0.564916	3
																						3.71089	3.71089	4.26288		0.55199	0.55199	3
																						3.12324	3.12324	3.64385		0.52061	0.52061	3
																						2.60717	2.60717	3.08405		0.476884	0.476884	3
																						2.16085	2.16085	2.58721		0.426361	0.426361	3
																						11.5238	11.5238	10.5492		-0.974622	-0.974622	3
																						10.8928	10.8928	10.1815		-0.711218	-0.711218	3
																						10.1949	10.1949	9.75648		-0.438398	-0.438398	3
																						9.43896	9.43896	9.27259		-0.166367	-0.166367	3
																						8.63832	8.63832	8.73128		0.0929619	0.0929619	3
																						7.81022	7.81022	8.13748		0.327261	0.327261	3
																						6.97447	6.97447	7.49991		0.525437	0.525437	3
																						6.15164	6.15164	6.83091		0.67927	0.67927	3
																						5.36103	5.36103	6.14565		0.784624	0.784624	3
																						4.61899	4.61899	5.46088		0.841892	0.841892	3
																						3.9377	3.9377	4.79328		0.855576	0.855576	3
																						3.32472	3.32472	4.15789		0.833171	0.833171	3
																						2.78315	2.78315	3.56687		0.783717	0.783717	3
																						2.31233	2.31233	3.02872		0.716394	0.716394	3
																						1.90871	1.90871	2.54816		0.639449	0.639449	3
																						11.0942	11.0942	9.78494		-1.30923	-1.30923	3
																						10.4161	10.4161	9.4678		-0.948307	-0.948307	3
																						9.67682	9.67682	9.09917		-0.577649	-0.577649	3
																						8.88826	8.88826	8.67687		-0.211384	-0.211384	3
																						8.06658	8.06658	8.2011		0.134525	0.134525	3
																						7.23098	7.23098	7.67505		0.444066	0.444066	3
																						6.40203	6.40203	7.10534		0.703319	0.703319	3
																						5.59961	5.59961	6.50205		0.902445	0.902445	3
																						4.84113	4.84113	5.87818		1.03705	1.03705	3
																						4.14014	4.14014	5.24866		1.10852	1.10852	3
																						3.50563	3.50563	4.629		1.12336	1.12336	3
																						2.94202	2.94202	4.03371		1.09169	1.09169	3
																						2.44971	2.44971	3.47509		1.02538	1.02538	3
																						2.02594	2.02594	2.96229		0.93635	0.93635	3
																						1.66575	1.66575	2.50097		0.835224	0.835224	3
																						10.6001	10.6001	8.97238		-1.62775	-1.62775	3
																						9.87592	9.87592	8.70501		-1.17091	-1.17091	3
																						9.09886	9.09886	8.39241		-0.706457	-0.706457	3
																						8.2841	8.2841	8.03186		-0.252239	-0.252239	3
																						7.45019	7.45019	7.62253		0.172337	0.172337	3
																						6.61751	6.61751	7.16602		0.548509	0.548509	3
																						5.80632	5.80632	6.66692		0.860601	0.860601	3
																						5.03484	5.03484	6.13298		1.09814	1.09814	3
																						4.31773	4.31773	5.57488		1.25716	1.25716	3
																						3.66518	3.66518	5.00551		1.34032	1.34032	3
																						3.0828	3.0828	4.43883		1.35602	1.35602	3
																						2.57196	2.57196	3.88854		1.31658	1.31658	3
																						2.13063	2.13063	3.36681		1.23617	1.23617	3
																						1.75434	1.75434	2.88324		1.1289	1.1289	3
																						1.43709	1.43709	2.44439		1.0073	1.0073	3
																						10.0412	10.0412	8.12862		-1.91258	-1.91258	3
																						9.27467	9.27467	7.90855		-1.36612	-1.36612	3
																						8.46676	8.46676	7.64968		-0.817074	-0.817074	3
																						7.63536	7.63536	7.34899		-0.286373	-0.286373	3
																						6.80063	6.80063	7.00481		0.204181	0.204181	3
																						5.98301	5.98301	6.61741		0.634398	0.634398	3
																						5.20134	5.20134	6.18952		0.988185	0.988185	3
																						4.47115	4.47115	5.72666		1.25551	1.25551	3
																						3.80368	3.80368	5.23711		1.43343	1.43343	3
																						3.20551	3.20551	4.73151		1.526	1.526	3
																						2.67891	2.67891	4.22201		1.54311	1.54311	3
																						2.22251	2.22251	3.72114		1.49863	1.49863	3
																						1.83231	1.83231	3.24058		1.40828	1.40828	3
																						1.50255	1.50255	2.79017		1.28762	1.28762	3
																						1.22662	1.22662	2.37717		1.15055	1.15055	3
																						9.42029	9.42029	7.2736		-2.14669	-2.14669	3
																						8.61878	8.61878	7.0969		-1.52189	-1.52189	3
																						7.79026	7.79026	6.88773		-0.902529	-0.902529	3
																						6.95458	6.95458	6.643		-0.311584	-0.311584	3
																						6.1323	6.1323	6.3605		0.228198	0.228198	3
																						5.34268	5.34268	6.03946		0.696776	0.696776	3
																						4.60197	4.60197	5.68102		1.07905	1.07905	3
																						3.92224	3.92224	5.28868		1.36644	1.36644	3
																						3.31094	3.31094	4.8684		1.55746	1.55746	3
																						2.77109	2.77109	4.4285		1.65741	1.65741	3
																						2.30192	2.30192	3.97907		1.67715	1.67715	3
																						1.89985	1.89985	3.53112		1.63127	1.63127	3
																						1.55938	1.55938	3.09552		1.53614	1.53614	3
																						1.27399	1.27399	2.68196		1.40797	1.40797	3
																						1.03681	1.03681	2.29817		1.26136	1.26136	3
																						8.74439	8.74439	6.42839		-2.31601	-2.31601	3
																						7.91878	7.91878	6.28997		-1.62881	-1.62881	3
																						7.08286	7.08286	6.12512		-0.957745	-0.957745	3
																						6.25721	6.25721	5.93081		-0.326396	-0.326396	3
																						5.46141	5.46141	5.70461		0.243198	0.243198	3
																						4.71227	4.71227	5.44501		0.732742	0.732742	3
																						4.02255	4.02255	5.15195		1.1294	1.1294	3
																						3.40042	3.40042	4.82719		1.42677	1.42677	3
																						2.84953	2.84953	4.47462		1.62509	1.62509	3
																						2.36966	2.36966	4.10026		1.73061	1.73061	3
																						1.95758	1.95758	3.71207		1.75449	1.75449	3
																						1.60803	1.60803	3.31925		1.71122	1.71122	3
																						1.31461	1.31461	2.93148		1.61687	1.61687	3
																						1.07045	1.07045	2.55795		1.48749	1.48749	3
																						0.868761	0.868761	2.2065		1.33774	1.33774	3
																						8.02469	8.02469	5.61307		-2.41163	-2.41163	3
																						7.18894	7.18894	5.50725		-1.68169	-1.68169	3
																						6.36086	6.36086	5.38045		-0.980404	-0.980404	3
																						5.56026	5.56026	5.22994		-0.330317	-0.330317	3
																						4.80439	4.80439	5.05324		0.248855	0.248855	3
																						4.10657	4.10657	4.84848		0.74191	0.74191	3
																						3.47556	3.47556	4.61474		1.13918	1.13918	3
																						2.91556	2.91556	4.35245		1.4369	1.4369	3
																						2.42678	2.42678	4.06374		1.63696	1.63696	3
																						2.00635	2.00635	3.75259		1.74624	1.74624	3
																						1.6492	1.6492	3.4248		1.77561	1.77561	3
																						1.34902	1.34902	3.08767		1.73865	1.73865	3
																						1.09898	1.09898	2.74937		1.65038	1.65038	3
																						0.892261	0.892261	2.41818		1.52592	1.52592	3
																						0.722403	0.722403	2.10171		1.37931	1.37931	3
[truncated: 54 more columns]

## Sheet: Mixed Non-competitive
																							Calculated values
		No Inhibitor	[I]1	[I]2	[I]3	[I]4	[I]5	[I]6	[I]7	[I]8	[I]9	[I]10	[I]11	[I]12	[I]13	[I]14	[I]15						No Inhibitor	[I]1	[I]2	[I]3	[I]4	[I]5	[I]6	[I]7	[I]8	[I]9	[I]10	[I]11	[I]12	[I]13	[I]14	[I]15
		0	0.0439805	0.0549756	0.0687195	0.0858993	0.107374	0.134218	0.167772	0.209715	0.262144	0.32768	0.4096	0.512	0.64	0.8	1	Km	Vmax	Ki	aKi		0	0.0439805	0.0549756	0.0687195	0.0858993	0.107374	0.134218	0.167772	0.209715	0.262144	0.32768	0.4096	0.512	0.64	0.8	1
[S]1	1	13.6364	13.2295	13.1315	13.0111	12.8637	12.684	12.4663	12.2045	11.8923	11.5238	11.0942	10.6001	10.0412	9.42029	8.74439	8.02469	0.0999986	15	0.13	31267.6		13.6364	13.2295	13.1315	13.0111	12.8636	12.6839	12.4663	12.2044	11.8923	11.5238	11.0941	10.6001	10.0411	9.4202	8.7443	8.0246		13.6364	13.2295	13.1315	13.0111	12.8636	12.6839	12.4663	12.2044	11.8923	11.5238
[S]2	0.8	13.3333	12.8503	12.7349	12.5937	12.4214	12.2126	11.9612	11.6612	11.3067	10.8928	10.4161	9.87592	9.27467	8.61878	7.91878	7.18894						13.3333	12.8503	12.7349	12.5936	12.4214	12.2125	11.9612	11.6611	11.3066	10.8927	10.4161	9.87586	9.27461	8.61872	7.91872	7.18887		13.3333	12.8503	12.7349	12.5936	12.4214	12.2125	11.9612	11.6611	11.3066	10.8927
[S]3	0.64	12.973	12.4058	12.2717	12.108	11.9095	11.6704	11.3846	11.0465	10.6511	10.1949	9.67682	9.09886	8.46676	7.79026	7.08286	6.36086						12.973	12.4058	12.2717	12.108	11.9095	11.6704	11.3846	11.0465	10.651	10.1948	9.67679	9.09883	8.46672	7.79022	7.08282	6.36081		12.973	12.4058	12.2717	12.108	11.9095	11.6704	11.3846	11.0465	10.651	10.1948
[S]4	0.512	12.549	11.8917	11.7379	11.5513	11.3262	11.0568	10.7376	10.3636	9.93121	9.43896	8.88826	8.2841	7.63536	6.95458	6.25721	5.56026						12.549	11.8916	11.7379	11.5513	11.3261	11.0568	10.7376	10.3636	9.9312	9.43894	8.88824	8.28408	7.63534	6.95456	6.25718	5.56024		12.549	11.8916	11.7379	11.5513	11.3261	11.0568	10.7376	10.3636	9.9312	9.43894
[S]5	0.4096	12.0565	11.3059	11.1327	10.9234	10.6727	10.375	10.0254	9.62021	9.15758	8.63832	8.06658	7.45019	6.80063	6.1323	5.46141	4.80439						12.0565	11.3059	11.1327	10.9234	10.6727	10.375	10.0254	9.62021	9.15758	8.63832	8.06657	7.45018	6.80062	6.13229	5.4614	4.80438		12.0565	11.3059	11.1327	10.9234	10.6727	10.375	10.0254	9.62021	9.15758	8.63832
[S]6	0.32768	11.4927	10.6502	10.4586	10.2285	9.95471	9.63244	9.25782	8.82861	8.345	7.81022	7.23098	6.61751	5.98301	5.34268	4.71227	4.10657			Sum R2	1.90902e-07		11.4927	10.6502	10.4586	10.2285	9.95472	9.63245	9.25782	8.82862	8.34501	7.81023	7.23099	6.61751	5.98302	5.34268	4.71227	4.10657		11.4927	10.6502	10.4586	10.2285	9.95472	9.63245	9.25782	8.82862	8.34501	7.81023
[S]7	0.262144	10.858	9.93032	9.72265	9.47497	9.18256	8.84149	8.4492	8.00522	7.51181	6.97447	6.40203	5.80632	5.20134	4.60197	4.02255	3.47556			Sum residuals %	0.00114901		10.858	9.93034	9.72267	9.47498	9.18258	8.84151	8.44922	8.00524	7.51183	6.97449	6.40204	5.80633	5.20135	4.60198	4.02256	3.47557		10.858	9.93034	9.72267	9.47498	9.18258	8.84151	8.44922	8.00524	7.51183	6.97449
[S]8	0.209715	10.1568	9.15663	8.93662	8.67604	8.37094	8.01846	7.61752	7.16941	6.67834	6.15164	5.59961	5.03484	4.47115	3.92224	3.40042	2.91556						10.1569	9.15666	8.93665	8.67607	8.37096	8.01848	7.61754	7.16943	6.67836	6.15166	5.59963	5.03486	4.47117	3.92226	3.40043	2.91557		10.1569	9.15666	8.93665	8.67607	8.37096	8.01848	7.61754	7.16943	6.67836	6.15166
[S]9	0.167772	9.39822	8.34402	8.11641	7.84879	7.5381	7.18269	6.78294	6.34175	5.86491	5.36103	4.84113	4.31773	3.80368	3.31094	2.84953	2.42678						9.39825	8.34404	8.11644	7.84882	7.53812	7.18272	6.78297	6.34178	5.86493	5.36106	4.84115	4.31775	3.8037	3.31096	2.84955	2.4268		9.39825	8.34404	8.11644	7.84882	7.53812	7.18272	6.78297	6.34178	5.86493	5.36106
[S]10	0.134218	8.5957	7.51082	7.28108	7.01294	6.70431	6.35474	5.9659	5.54202	5.08995	4.61899	4.14014	3.66518	3.20551	2.77109	2.36966	2.00635						8.59573	7.51085	7.28111	7.01297	6.70434	6.35477	5.96593	5.54205	5.08998	4.61902	4.14017	3.66521	3.20553	2.77111	2.36967	2.00636		8.59573	7.51085	7.28111	7.01297	6.70434	6.35477	5.96593	5.54205	5.08998	4.61902
[S]11	0.107374	7.7667	6.67735	6.45114	6.18906	5.88996	5.55442	5.18518	4.78737	4.36843	3.9377	3.50563	3.0828	2.67891	2.30192	1.95758	1.6492						7.76673	6.67739	6.45118	6.1891	5.88999	5.55445	5.18521	4.7874	4.36846	3.93773	3.50566	3.08282	2.67893	2.30194	1.95759	1.64921		7.76673	6.67739	6.45118	6.1891	5.88999	5.55445	5.18521	4.7874	4.36846	3.93773
[S]12	0.0858993	6.93112	5.86396	5.64661	5.39658	5.11355	4.79894	4.45623	4.09103	3.71089	3.32472	2.94202	2.57196	2.22251	1.89985	1.60803	1.34902						6.93115	5.86399	5.64665	5.39662	5.11358	4.79897	4.45626	4.09106	3.71092	3.32475	2.94205	2.57198	2.22253	1.89986	1.60805	1.34903		6.93115	5.86399	5.64665	5.39662	5.11358	4.79897	4.45626	4.09106	3.71092	3.32475
[S]13	0.0687195	6.1095	5.08906	4.88508	4.652	4.39016	4.10159	3.79018	3.46165	3.12324	2.78315	2.44971	2.13063	1.83231	1.55938	1.31461	1.09898						6.10954	5.08909	4.88511	4.65203	4.3902	4.10163	3.79021	3.46168	3.12327	2.78318	2.44973	2.13065	1.83232	1.55939	1.31462	1.099		6.10954	5.08909	4.88511	4.65203	4.3902	4.10163	3.79021	3.46168	3.12327	2.78318
[S]14	0.0549756	5.32106	4.36761	4.18035	3.9677	3.7305	3.4711	3.19353	2.90332	2.60717	2.31233	2.02594	1.75434	1.50255	1.27399	1.07045	0.892261						5.32109	4.36764	4.18038	3.96773	3.73053	3.47113	3.19356	2.90335	2.60719	2.31235	2.02596	1.75436	1.50257	1.27401	1.07046	0.892271		5.32109	4.36764	4.18038	3.96773	3.73053	3.47113	3.19356	2.90335	2.60719	2.31235
[S]15	0.0439805	4.58192	3.71015	3.54168	3.35146	3.14061	2.91164	2.66845	2.41619	2.16085	1.90871	1.66575	1.43709	1.22662	1.03681	0.868761	0.722403						4.58195	3.71018	3.54171	3.35149	3.14064	2.91166	2.66847	2.41621	2.16087	1.90873	1.66577	1.43711	1.22663	1.03682	0.868771	0.722412		4.58195	3.71018	3.54171	3.35149	3.14064	2.91166	2.66847	2.41621	2.16087	1.90873
	1	1	1	1	1	1	1	1	1	1	1	1	1	1	1	1	1																					1	1	13.6364	13.2295	13.1315	13.0111	12.8636	12.6839	12.4663	12.2044	11.8923	11.5238
	1	1	1	1	1	1	1	1	1	1	1	1	1	1	1	1	1					13.6364	13.6364	13.6364		-1.26269e-05	-1.26269e-05	4										0.8	0.8	13.3333	12.8503	12.7349	12.5936	12.4214	12.2125	11.9612	11.6611	11.3066	10.8927
	1	1	1	1	1	1	1	1	1	1	1	1	1	1	1	1	1					13.3333	13.3333	13.3333		-8.62238e-06	-8.62238e-06	4										0.64	0.64	12.973	12.4058	12.2717	12.108	11.9095	11.6704	11.3846	11.0465	10.651	10.1948
	1	1	1	1	1	1	1	1	1	1	1	1	1	1	1	1	1					12.973	12.973	12.973		-4.0806e-06	-4.0806e-06	4										0.512	0.512	12.549	11.8916	11.7379	11.5513	11.3261	11.0568	10.7376	10.3636	9.9312	9.43894
	1	1	1	1	1	1	1	1	1	1	1	1	1	1	1	1	1					12.549	12.549	12.549		9.56207e-07	9.56207e-07	4										0.4096	0.4096	12.0565	11.3059	11.1327	10.9234	10.6727	10.375	10.0254	9.62021	9.15758	8.63832
	1	1	1	1	1	1	1	1	1	1	1	1	1	1	1	1	1					12.0565	12.0565	12.0565		6.39144e-06	6.39144e-06	4										0.32768	0.32768	11.4927	10.6502	10.4586	10.2285	9.95472	9.63245	9.25782	8.82862	8.34501	7.81023
	1	1	1	1	1	1	1	1	1	1	1	1	1	1	1	1	1					11.4927	11.4927	11.4927		1.20647e-05	1.20647e-05	4										0.262144	0.262144	10.858	9.93034	9.72267	9.47498	9.18258	8.84151	8.44922	8.00524	7.51183	6.97449
	1	1	1	1	1	1	1	1	1	1	1	1	1	1	1	1	1					10.858	10.858	10.858		1.77502e-05	1.77502e-05	4										0.209715	0.209715	10.1569	9.15666	8.93665	8.67607	8.37096	8.01848	7.61754	7.16943	6.67836	6.15166
	1	1	1	1	1	1	1	1	1	1	1	1	1	1	1	1	1					10.1568	10.1568	10.1569		2.31677e-05	2.31677e-05	4										0.167772	0.167772	9.39825	8.34404	8.11644	7.84882	7.53812	7.18272	6.78297	6.34178	5.86493	5.36106
	1	1	1	1	1	1	1	1	1	1	1	1	1	1	1	1	1					9.39822	9.39822	9.39825		2.80085e-05	2.80085e-05	4										0.134218	0.134218	8.59573	7.51085	7.28111	7.01297	6.70434	6.35477	5.96593	5.54205	5.08998	4.61902
	1	1	1	1	1	1	1	1	1	1	1	1	1	1	1	1	1					8.5957	8.5957	8.59573		3.19748e-05	3.19748e-05	4										0.107374	0.107374	7.76673	6.67739	6.45118	6.1891	5.88999	5.55445	5.18521	4.7874	4.36846	3.93773
	1	1	1	1	1	1	1	1	1	1	1	1	1	1	1	1	1					7.7667	7.7667	7.76673		3.48253e-05	3.48253e-05	4										0.0858993	0.0858993	6.93115	5.86399	5.64665	5.39662	5.11358	4.79897	4.45626	4.09106	3.71092	3.32475
	1	1	1	1	1	1	1	1	1	1	1	1	1	1	1	1	1					6.93112	6.93112	6.93115		3.64165e-05	3.64165e-05	4										0.0687195	0.0687195	6.10954	5.08909	4.88511	4.65203	4.3902	4.10163	3.79021	3.46168	3.12327	2.78318
	1	1	1	1	1	1	1	1	1	1	1	1	1	1	1	1	1					6.1095	6.1095	6.10954		3.67262e-05	3.67262e-05	4										0.0549756	0.0549756	5.32109	4.36764	4.18038	3.96773	3.73053	3.47113	3.19356	2.90335	2.60719	2.31235
	1	1	1	1	1	1	1	1	1	1	1	1	1	1	1	1	1					5.32106	5.32106	5.32109		3.58534e-05	3.58534e-05	4										0.0439805	0.0439805	4.58195	3.71018	3.54171	3.35149	3.14064	2.91166	2.66847	2.41621	2.16087	1.90873
																						4.58192	4.58192	4.58195		3.39945e-05	3.39945e-05	4
																						13.2295	13.2295	13.2295		-2.27665e-05	-2.27665e-05	4											1	0.0733334	0.0755889	0.0761527	0.0768576	0.0777386	0.0788399	0.0802166	0.0819373	0.0840883	0.0867771
																						12.8503	12.8503	12.8503		-1.69716e-05	-1.69716e-05	4											1.25	0.075	0.0778194	0.0785242	0.0794052	0.0805065	0.0818831	0.0836039	0.0857549	0.0884436	0.0918045
																						12.4058	12.4058	12.4058		-1.05653e-05	-1.05653e-05	4											1.5625	0.0770834	0.0806075	0.0814885	0.0825898	0.0839664	0.0856872	0.0878381	0.0905268	0.0938877	0.0980888
																						11.8917	11.8917	11.8916		-3.67496e-06	-3.67496e-06	4											1.95312	0.0796875	0.0840926	0.0851939	0.0865705	0.0882913	0.0904422	0.0931309	0.0964917	0.100693	0.105944
																						11.3059	11.3059	11.3059		3.49449e-06	3.49449e-06	4											2.44141	0.0829427	0.088449	0.0898256	0.0915464	0.0936973	0.096386	0.0997468	0.103948	0.109199	0.115763
																						10.6502	10.6502	10.6502		1.06617e-05	1.06617e-05	4											3.05176	0.0870116	0.0938946	0.0956153	0.0977662	0.100455	0.103816	0.108017	0.113268	0.119832	0.128037
																						9.93032	9.93032	9.93034		1.74855e-05	1.74855e-05	4											3.8147	0.0920978	0.100702	0.102852	0.105541	0.108902	0.113103	0.118354	0.124918	0.133123	0.14338
																						9.15663	9.15663	9.15666		2.35996e-05	2.35996e-05	4											4.76837	0.0984556	0.10921	0.111899	0.11526	0.119461	0.124712	0.131276	0.139481	0.149737	0.162558
																						8.34402	8.34402	8.34404		2.8661e-05	2.8661e-05	4											5.96046	0.106403	0.119846	0.123207	0.127408	0.132659	0.139223	0.147428	0.157684	0.170505	0.18653
																						7.51082	7.51082	7.51085		3.24033e-05	3.24033e-05	4											7.45058	0.116337	0.133141	0.137342	0.142593	0.149157	0.157362	0.167618	0.180439	0.196464	0.216496
																						6.67735	6.67735	6.67739		3.46809e-05	3.46809e-05	4											9.31323	0.128754	0.149759	0.15501	0.161574	0.16978	0.180036	0.192856	0.208882	0.228914	0.253953
																						5.86396	5.86396	5.86399		3.549e-05	3.549e-05	4											11.6415	0.144276	0.170532	0.177096	0.185301	0.195558	0.208378	0.224403	0.244435	0.269475	0.300775
																						5.08906	5.08906	5.08909		3.49619e-05	3.49619e-05	4											14.5519	0.163678	0.196499	0.204704	0.21496	0.22778	0.243806	0.263838	0.288877	0.320177	0.359302
																						4.36761	4.36761	4.36764		3.33309e-05	3.33309e-05	4											18.1899	0.187931	0.228957	0.239213	0.252033	0.268059	0.28809	0.31313	0.34443	0.383555	0.43246
																						3.71015	3.71015	3.71018		3.08879e-05	3.08879e-05	4											22.7374	0.218247	0.269529	0.282349	0.298375	0.318407	0.343446	0.374746	0.413871	0.462776	0.523909
																						13.1315	13.1315	13.1315		-2.51109e-05	-2.51109e-05	4
																						12.7349	12.7349	12.7349		-1.88689e-05	-1.88689e-05	4												13.6364	13.2295	13.1315	13.0111	12.8637	12.684	12.4663	12.2045	11.8923	11.5238
																						12.2717	12.2717	12.2717		-1.20097e-05	-1.20097e-05	4												13.3333	12.8503	12.7349	12.5937	12.4214	12.2126	11.9612	11.6612	11.3067	10.8928
																						11.7379	11.7379	11.7379		-4.68486e-06	-4.68486e-06	4												12.973	12.4058	12.2717	12.108	11.9095	11.6704	11.3846	11.0465	10.6511	10.1949
																						11.1327	11.1327	11.1327		2.87289e-06	2.87289e-06	4												12.549	11.8917	11.7379	11.5513	11.3262	11.0568	10.7376	10.3636	9.93121	9.43896
																						10.4586	10.4586	10.4586		1.0354e-05	1.0354e-05	4												12.0565	11.3059	11.1327	10.9234	10.6727	10.375	10.0254	9.62021	9.15758	8.63832
																						9.72265	9.72265	9.72267		1.73943e-05	1.73943e-05	4												11.4927	10.6502	10.4586	10.2285	9.95471	9.63244	9.25782	8.82861	8.345	7.81022
																						8.93662	8.93662	8.93665		2.36151e-05	2.36151e-05	4												10.858	9.93032	9.72265	9.47497	9.18256	8.84149	8.4492	8.00522	7.51181	6.97447
																						8.11641	8.11641	8.11644		2.8676e-05	2.8676e-05	4												10.1568	9.15663	8.93662	8.67604	8.37094	8.01846	7.61752	7.16941	6.67834	6.15164
																						7.28108	7.28108	7.28111		3.23286e-05	3.23286e-05	4												9.39822	8.34402	8.11641	7.84879	7.5381	7.18269	6.78294	6.34175	5.86491	5.36103
																						6.45114	6.45114	6.45118		3.4457e-05	3.4457e-05	4												8.5957	7.51082	7.28108	7.01294	6.70431	6.35474	5.9659	5.54202	5.08995	4.61899
																						5.64661	5.64661	5.64665		3.50925e-05	3.50925e-05	4												7.7667	6.67735	6.45114	6.18906	5.88996	5.55442	5.18518	4.78737	4.36843	3.9377
																						4.88508	4.88508	4.88511		3.4399e-05	3.4399e-05	4												6.93112	5.86396	5.64661	5.39658	5.11355	4.79894	4.45623	4.09103	3.71089	3.32472
																						4.18035	4.18035	4.18038		3.26353e-05	3.26353e-05	4												6.1095	5.08906	4.88508	4.652	4.39016	4.10159	3.79018	3.46165	3.12324	2.78315
																						3.54168	3.54168	3.54171		3.01054e-05	3.01054e-05	4												5.32106	4.36761	4.18035	3.9677	3.7305	3.4711	3.19353	2.90332	2.60717	2.31233
																						13.0111	13.0111	13.0111		-2.79417e-05	-2.79417e-05	4												4.58192	3.71015	3.54168	3.35146	3.14061	2.91164	2.66845	2.41619	2.16085	1.90871
																						12.5937	12.5937	12.5936		-2.11426e-05	-2.11426e-05	4
																						12.108	12.108	12.108		-1.37258e-05	-1.37258e-05	4												1/s	0	0.0439805	0.0549756	0.0687195	0.0858993	0.107374	0.134218	0.167772	0.209715
																						11.5513	11.5513	11.5513		-5.87386e-06	-5.87386e-06	4											1	1	0.0733334	0.0755889	0.0761527	0.0768576	0.0777386	0.0788399	0.0802166	0.0819373	0.0840883
																						10.9234	10.9234	10.9234		2.14575e-06	2.14575e-06	4											2	1.25	0.075	0.0778194	0.0785242	0.0794052	0.0805065	0.0818831	0.0836039	0.0857549	0.0884436
																						10.2285	10.2285	10.2285		9.99015e-06	9.99015e-06	4											3	1.5625	0.0770834	0.0806075	0.0814885	0.0825898	0.0839664	0.0856872	0.0878381	0.0905268	0.0938877
																						9.47497	9.47497	9.47498		1.72701e-05	1.72701e-05	4											4	1.95312	0.0796875	0.0840926	0.0851939	0.0865705	0.0882913	0.0904422	0.0931309	0.0964917	0.100693
																						8.67604	8.67604	8.67607		2.35963e-05	2.35963e-05	4											5	2.44141	0.0829427	0.088449	0.0898256	0.0915464	0.0936973	0.096386	0.0997468	0.103948	0.109199
																						7.84879	7.84879	7.84882		2.86365e-05	2.86365e-05	4											6	3.05176	0.0870116	0.0938946	0.0956153	0.0977662	0.100455	0.103816	0.108017	0.113268	0.119832
																						7.01294	7.01294	7.01297		3.21683e-05	3.21683e-05	4											7	3.8147	0.0920978	0.100702	0.102852	0.105541	0.108902	0.113103	0.118354	0.124918	0.133123
																						6.18906	6.18906	6.1891		3.41142e-05	3.41142e-05	4											8	4.76837	0.0984556	0.10921	0.111899	0.11526	0.119461	0.124712	0.131276	0.139481	0.149737
																						5.39658	5.39658	5.39662		3.45478e-05	3.45478e-05	4											9	5.96046	0.106403	0.119846	0.123207	0.127408	0.132659	0.139223	0.147428	0.157684	0.170505
																						4.652	4.652	4.65203		3.36702e-05	3.36702e-05	4											10	7.45058	0.116337	0.133141	0.137342	0.142593	0.149157	0.157362	0.167618	0.180439	0.196464
																						3.9677	3.9677	3.96773		3.17658e-05	3.17658e-05	4											11	9.31323	0.128754	0.149759	0.15501	0.161574	0.16978	0.180036	0.192856	0.208882	0.228914
																						3.35146	3.35146	3.35149		2.9151e-05	2.9151e-05	4											12	11.6415	0.144276	0.170532	0.177096	0.185301	0.195558	0.208378	0.224403	0.244435	0.269475
																						12.8637	12.8637	12.8636		-3.13309e-05	-3.13309e-05	4											13	14.5519	0.163678	0.196499	0.204704	0.21496	0.22778	0.243806	0.263838	0.288877	0.320177
																						12.4214	12.4214	12.4214		-2.38393e-05	-2.38393e-05	4											14	18.1899	0.187931	0.228957	0.239213	0.252033	0.268059	0.28809	0.31313	0.34443	0.383555
																						11.9095	11.9095	11.9095		-1.57396e-05	-1.57396e-05	4											15	22.7374	0.218247	0.269529	0.282349	0.298375	0.318407	0.343446	0.374746	0.413871	0.462776
																						11.3262	11.3262	11.3261		-7.25365e-06	-7.25365e-06	4
																						10.6727	10.6727	10.6727		1.30835e-06	1.30835e-06	4
																						9.95471	9.95471	9.95472		9.56526e-06	9.56526e-06	4
																						9.18256	9.18256	9.18258		1.7102e-05	1.7102e-05	4
																						8.37094	8.37094	8.37096		2.35232e-05	2.35232e-05	4
																						7.5381	7.5381	7.53812		2.85131e-05	2.85131e-05	4
																						6.70431	6.70431	6.70434		3.18862e-05	3.18862e-05	4
																						5.88996	5.88996	5.88999		3.36135e-05	3.36135e-05	4
																						5.11355	5.11355	5.11358		3.38183e-05	3.38183e-05	4
																						4.39016	4.39016	4.3902		3.27423e-05	3.27423e-05	4
																						3.7305	3.7305	3.73053		3.06958e-05	3.06958e-05	4
																						3.14061	3.14061	3.14064		2.80052e-05	2.80052e-05	4
																						12.684	12.684	12.6839		-3.53459e-05	-3.53459e-05	4
																						12.2126	12.2126	12.2125		-2.69971e-05	-2.69971e-05	4
																						11.6704	11.6704	11.6704		-1.80666e-05	-1.80666e-05	4
																						11.0568	11.0568	11.0568		-8.8265e-06	-8.8265e-06	4
																						10.375	10.375	10.375		3.62243e-07	3.62243e-07	4
																						9.63244	9.63244	9.63245		9.07619e-06	9.07619e-06	4
																						8.84149	8.84149	8.84151		1.68765e-05	1.68765e-05	4
																						8.01846	8.01846	8.01848		2.337e-05	2.337e-05	4
																						7.18269	7.18269	7.18272		2.82699e-05	2.82699e-05	4
																						6.35474	6.35474	6.35477		3.14406e-05	3.14406e-05	4
																						5.55442	5.55442	5.55445		3.29132e-05	3.29132e-05	4
																						4.79894	4.79894	4.79897		3.28669e-05	3.28669e-05	4
																						4.10159	4.10159	4.10163		3.15861e-05	3.15861e-05	4
																						3.4711	3.4711	3.47113		2.94051e-05	2.94051e-05	4
																						2.91164	2.91164	2.91166		2.66563e-05	2.66563e-05	4
																						12.4663	12.4663	12.4663		-4.00407e-05	-4.00407e-05	4
																						11.9612	11.9612	11.9612		-3.06368e-05	-3.06368e-05	4
																						11.3846	11.3846	11.3846		-2.07052e-05	-2.07052e-05	4
																						10.7376	10.7376	10.7376		-1.05803e-05	-1.05803e-05	4
																						10.0254	10.0254	10.0254		-6.82029e-07	-6.82029e-07	4
																						9.25782	9.25782	9.25782		8.52274e-06	8.52274e-06	4
																						8.4492	8.4492	8.44922		1.65782e-05	1.65782e-05	4
																						7.61752	7.61752	7.61754		2.31063e-05	2.31063e-05	4
																						6.78294	6.78294	6.78297		2.78661e-05	2.78661e-05	4
																						5.9659	5.9659	5.96593		3.07877e-05	3.07877e-05	4
																						5.18518	5.18518	5.18521		3.19729e-05	3.19729e-05	4
																						4.45623	4.45623	4.45626		3.1662e-05	3.1662e-05	4
																						3.79018	3.79018	3.79021		3.01812e-05	3.01812e-05	4
																						3.19353	3.19353	3.19356		2.78843e-05	2.78843e-05	4
																						2.66845	2.66845	2.66847		2.51042e-05	2.51042e-05	4
																						12.2045	12.2045	12.2044		-4.54422e-05	-4.54422e-05	4
																						11.6612	11.6612	11.6611		-3.47502e-05	-3.47502e-05	4
																						11.0465	11.0465	11.0465		-2.36273e-05	-2.36273e-05	4
																						10.3636	10.3636	10.3636		-1.24832e-05	-1.24832e-05	4
																						9.62021	9.62021	9.62021		-1.80235e-06	-1.80235e-06	4
																						8.82861	8.82861	8.82862		7.9086e-06	7.9086e-06	4
																						8.00522	8.00522	8.00524		1.619e-05	1.619e-05	4
																						7.16941	7.16941	7.16943		2.26989e-05	2.26989e-05	4
																						6.34175	6.34175	6.34178		2.72604e-05	2.72604e-05	4
																						5.54202	5.54202	5.54205		2.98872e-05	2.98872e-05	4
																						4.78737	4.78737	4.7874		3.07609e-05	3.07609e-05	4
																						4.09103	4.09103	4.09106		3.01846e-05	3.01846e-05	4
																						3.46165	3.46165	3.46168		2.8522e-05	2.8522e-05	4
																						2.90332	2.90332	2.90335		2.61398e-05	2.61398e-05	4
																						2.41619	2.41619	2.41621		2.33645e-05	2.33645e-05	4
																						11.8923	11.8923	11.8923		-5.1533e-05	-5.1533e-05	4
																						11.3067	11.3067	11.3066		-3.92867e-05	-3.92867e-05	4
																						10.6511	10.6511	10.651		-2.67698e-05	-2.67698e-05	4
																						9.93121	9.93121	9.9312		-1.44788e-05	-1.44788e-05	4
																						9.15758	9.15758	9.15758		-2.96331e-06	-2.96331e-06	4
																						8.345	8.345	8.34501		7.24214e-06	7.24214e-06	4
																						7.51181	7.51181	7.51183		1.56958e-05	1.56958e-05	4
																						6.67834	6.67834	6.67836		2.21157e-05	2.21157e-05	4
																						5.86491	5.86491	5.86493		2.6417e-05	2.6417e-05	4
																						5.08995	5.08995	5.08998		2.871e-05	2.871e-05	4
																						4.36843	4.36843	4.36846		2.92617e-05	2.92617e-05	4
																						3.71089	3.71089	3.71092		2.84349e-05	2.84349e-05	4
																						3.12324	3.12324	3.12327		2.66232e-05	2.66232e-05	4
																						2.60717	2.60717	2.60719		2.41969e-05	2.41969e-05	4
																						2.16085	2.16085	2.16087		2.14687e-05	2.14687e-05	4
																						11.5238	11.5238	11.5238		-5.82319e-05	-5.82319e-05	4
																						10.8928	10.8928	10.8927		-4.41399e-05	-4.41399e-05	4
																						10.1949	10.1949	10.1948		-3.00273e-05	-3.00273e-05	4
																						9.43896	9.43896	9.43894		-1.6484e-05	-1.6484e-05	4
																						8.63832	8.63832	8.63832		-4.11624e-06	-4.11624e-06	4
																						7.81022	7.81022	7.81023		6.53663e-06	6.53663e-06	4
																						6.97447	6.97447	6.97449		1.50823e-05	1.50823e-05	4
																						6.15164	6.15164	6.15166		2.13314e-05	2.13314e-05	4
																						5.36103	5.36103	5.36106		2.53126e-05	2.53126e-05	4
																						4.61899	4.61899	4.61902		2.72453e-05	2.72453e-05	4
																						3.9377	3.9377	3.93773		2.74818e-05	2.74818e-05	4
																						3.32472	3.32472	3.32475		2.64361e-05	2.64361e-05	4
																						2.78315	2.78315	2.78318		2.45206e-05	2.45206e-05	4
																						2.31233	2.31233	2.31235		2.20993e-05	2.20993e-05	4
																						1.90871	1.90871	1.90873		1.94638e-05	1.94638e-05	4
																						11.0942	11.0942	11.0941		-6.53736e-05	-6.53736e-05	4
																						10.4161	10.4161	10.4161		-4.91363e-05	-4.91363e-05	4
																						9.67682	9.67682	9.67679		-3.32488e-05	-3.32488e-05	4
																						8.88826	8.88826	8.88824		-1.83908e-05	-1.83908e-05	4
																						8.06658	8.06658	8.06657		-5.20201e-06	-5.20201e-06	4
																						7.23098	7.23098	7.23099		5.80977e-06	5.80977e-06	4
																						6.40203	6.40203	6.40204		1.43425e-05	1.43425e-05	4
																						5.59961	5.59961	5.59963		2.0333e-05	2.0333e-05	4
																						4.84113	4.84113	4.84115		2.39434e-05	2.39434e-05	4
																						4.14014	4.14014	4.14017		2.55069e-05	2.55069e-05	4
																						3.50563	3.50563	3.50566		2.54533e-05	2.54533e-05	4
																						2.94202	2.94202	2.94205		2.42353e-05	2.42353e-05	4
																						2.44971	2.44971	2.44973		2.22702e-05	2.22702e-05	4
																						2.02594	2.02594	2.02596		1.99059e-05	1.99059e-05	4
																						1.66575	1.66575	1.66577		1.74068e-05	1.74068e-05	4
																						10.6001	10.6001	10.6001		-7.26936e-05	-7.26936e-05	4
																						9.87592	9.87592	9.87586		-5.40322e-05	-5.40322e-05	4
																						9.09886	9.09886	9.09883		-3.62429e-05	-3.62429e-05	4
																						8.2841	8.2841	8.28408		-2.00737e-05	-2.00737e-05	4
																						7.45019	7.45019	7.45018		-6.15688e-06	-6.15688e-06	4
																						6.61751	6.61751	6.61751		5.08223e-06	5.08223e-06	4
																						5.80632	5.80632	5.80633		1.34779e-05	1.34779e-05	4
																						5.03484	5.03484	5.03486		1.91247e-05	1.91247e-05	4
																						4.31773	4.31773	4.31775		2.23296e-05	2.23296e-05	4
																						3.66518	3.66518	3.66521		2.35345e-05	2.35345e-05	4
																						3.0828	3.0828	3.08282		2.32327e-05	2.32327e-05	4
																						2.57196	2.57196	2.57198		2.18987e-05	2.18987e-05	4
																						2.13063	2.13063	2.13065		1.99416e-05	1.99416e-05	4
																						1.75434	1.75434	1.75436		1.76838e-05	1.76838e-05	4
																						1.43709	1.43709	1.43711		1.53589e-05	1.53589e-05	4
																						10.0412	10.0412	10.0411		-7.98252e-05	-7.98252e-05	4
																						9.27467	9.27467	9.27461		-5.85239e-05	-5.85239e-05	4
																						8.46676	8.46676	8.46672		-3.87932e-05	-3.87932e-05	4
																						7.63536	7.63536	7.63534		-2.14045e-05	-2.14045e-05	4
																						6.80063	6.80063	6.80062		-6.92098e-06	-6.92098e-06	4
																						5.98301	5.98301	5.98302		4.37553e-06	4.37553e-06	4
																						5.20134	5.20134	5.20135		1.25012e-05	1.25012e-05	4
																						4.47115	4.47115	4.47117		1.77302e-05	1.77302e-05	4
																						3.80368	3.80368	3.8037		2.05145e-05	2.05145e-05	4
																						3.20551	3.20551	3.20553		2.13901e-05	2.13901e-05	4
																						2.67891	2.67891	2.67893		2.0894e-05	2.0894e-05	4
																						2.22251	2.22251	2.22253		1.95042e-05	1.95042e-05	4
																						1.83231	1.83231	1.83232		1.76094e-05	1.76094e-05	4
																						1.50255	1.50255	1.50257		1.55002e-05	1.55002e-05	4
																						1.22662	1.22662	1.22663		1.33777e-05	1.33777e-05	4
																						9.42029	9.42029	9.4202		-8.63164e-05	-8.63164e-05	4
																						8.61878	8.61878	8.61872		-6.22732e-05	-6.22732e-05	4
																						7.79026	7.79026	7.79022		-4.06842e-05	-4.06842e-05	4
																						6.95458	6.95458	6.95456		-2.22706e-05	-2.22706e-05	4
																						6.1323	6.1323	6.13229		-7.44776e-06	-7.44776e-06	4
																						5.34268	5.34268	5.34268		3.70951e-06	3.70951e-06	4
																						4.60197	4.60197	4.60198		1.14355e-05	1.14355e-05	4
																						3.92224	3.92224	3.92226		1.61914e-05	1.61914e-05	4
																						3.31094	3.31094	3.31096		1.85607e-05	1.85607e-05	4
																						2.77109	2.77109	2.77111		1.91508e-05	1.91508e-05	4
																						2.30192	2.30192	2.30194		1.85192e-05	1.85192e-05	4
																						1.89985	1.89985	1.89986		1.71311e-05	1.71311e-05	4
																						1.55938	1.55938	1.55939		1.53445e-05	1.53445e-05	4
																						1.27399	1.27399	1.27401		1.34152e-05	1.34152e-05	4
																						1.03681	1.03681	1.03682		1.15121e-05	1.15121e-05	4
																						8.74439	8.74439	8.7443		-9.16699e-05	-9.16699e-05	4
																						7.91878	7.91878	7.91872		-6.49503e-05	-6.49503e-05	4
																						7.08286	7.08286	7.08282		-4.17345e-05	-4.17345e-05	4
																						6.25721	6.25721	6.25718		-2.25946e-05	-2.25946e-05	4
																						5.46141	5.46141	5.4614		-7.71198e-06	-7.71198e-06	4
																						4.71227	4.71227	4.71227		3.10011e-06	3.10011e-06	4
																						4.02255	4.02255	4.02256		1.03124e-05	1.03124e-05	4
																						3.40042	3.40042	3.40043		1.4563e-05	1.4563e-05	4
																						2.84953	2.84953	2.84955		1.65412e-05	1.65412e-05	4
																						2.36966	2.36966	2.36967		1.68977e-05	1.68977e-05	4
																						1.95758	1.95758	1.95759		1.61882e-05	1.61882e-05	4
																						1.60803	1.60803	1.60805		1.48508e-05	1.48508e-05	4
																						1.31461	1.31461	1.31462		1.32068e-05	1.32068e-05	4
																						1.07045	1.07045	1.07046		1.14761e-05	1.14761e-05	4
																						0.868761	0.868761	0.868771		9.79797e-06	9.79797e-06	4
																						8.02469	8.02469	8.0246		-9.54082e-05	-9.54082e-05	4
																						7.18894	7.18894	7.18887		-6.62853e-05	-6.62853e-05	4
																						6.36086	6.36086	6.36081		-4.18293e-05	-4.18293e-05	4
																						5.56026	5.56026	5.56024		-2.23489e-05	-2.23489e-05	4
																						4.80439	4.80439	4.80438		-7.7138e-06	-7.7138e-06	4
																						4.10657	4.10657	4.10657		2.55787e-06	2.55787e-06	4
																						3.47556	3.47556	3.47557		9.16849e-06	9.16849e-06	4
																						2.91556	2.91556	2.91557		1.29053e-05	1.29053e-05	4
																						2.42678	2.42678	2.4268		1.45297e-05	1.45297e-05	4
																						2.00635	2.00635	2.00636		1.47063e-05	1.47063e-05	4
																						1.6492	1.6492	1.64921		1.39695e-05	1.39695e-05	4
																						1.34902	1.34902	1.34903		1.272e-05	1.272e-05	4
																						1.09898	1.09898	1.099		1.12399e-05	1.12399e-05	4
																						0.892261	0.892261	0.892271		9.71472e-06	9.71472e-06	4
																						0.722403	0.722403	0.722412		8.25721e-06	8.25721e-06	4
[truncated: 54 more columns]

## Sheet: Modifier equation
																							Calculated values
		No Inhibitor	[I]1	[I]2	[I]3	[I]4	[I]5	[I]6	[I]7	[I]8	[I]9	[I]10	[I]11	[I]12	[I]13	[I]14	[I]15					Ki	No Inhibitor	[I]1	[I]2	[I]3	[I]4	[I]5	[I]6	[I]7	[I]8	[I]9	[I]10	[I]11	[I]12	[I]13	[I]14	[I]15
		0	0.0439805	0.0549756	0.0687195	0.0858993	0.107374	0.134218	0.167772	0.209715	0.262144	0.32768	0.4096	0.512	0.64	0.8	1	K1	0.100096	V1	15.0081	110.395	0	0.0439805	0.0549756	0.0687195	0.0858993	0.107374	0.134218	0.167772	0.209715	0.262144	0.32768	0.4096	0.512	0.64	0.8	1
[S]1	1	13.6364	13.2295	13.1315	13.0111	12.8637	12.684	12.4663	12.2045	11.8923	11.5238	11.0942	10.6001	10.0412	9.42029	8.74439	8.02469	K2	85.0789	V2	8.01884		13.6425	13.2329	13.1344	13.0132	12.8649	12.6843	12.4655	12.2025	11.8891	11.5195	11.0887	10.5939	10.0347	9.41425	8.73968	8.02238		13.6425	13.2329	13.1344	13.0132	12.8649	12.6843	12.4655	12.2025	11.8891	11.5195
[S]2	0.8	13.3333	12.8503	12.7349	12.5937	12.4214	12.2126	11.9612	11.6612	11.3067	10.8928	10.4161	9.87592	9.27467	8.61878	7.91878	7.18894						13.3391	12.8534	12.7375	12.5955	12.4224	12.2127	11.9604	11.6593	11.3038	10.889	10.4116	9.87113	9.27009	8.61512	7.91689	7.18977		13.3391	12.8534	12.7375	12.5955	12.4224	12.2127	11.9604	11.6593	11.3038	10.889
[S]3	0.64	12.973	12.4058	12.2717	12.108	11.9095	11.6704	11.3846	11.0465	10.6511	10.1949	9.67682	9.09886	8.46676	7.79026	7.08286	6.36086						12.9783	12.4085	12.2738	12.1095	11.9103	11.6703	11.3837	11.0447	10.6485	10.1917	9.67331	9.09541	8.46391	7.7887	7.08333	6.36414		12.9783	12.4085	12.2738	12.1095	11.9103	11.6703	11.3837	11.0447	10.6485	10.1917
[S]4	0.512	12.549	11.8917	11.7379	11.5513	11.3262	11.0568	10.7376	10.3636	9.93121	9.43896	8.88826	8.2841	7.63536	6.95458	6.25721	5.56026						12.5538	11.8939	11.7397	11.5524	11.3267	11.0566	10.7367	10.362	9.92904	9.43642	8.88567	8.28188	7.63404	6.95476	6.25951	5.56528		12.5538	11.8939	11.7397	11.5524	11.3267	11.0566	10.7367	10.362	9.92904	9.43642
[S]5	0.4096	12.0565	11.3059	11.1327	10.9234	10.6727	10.375	10.0254	9.62021	9.15758	8.63832	8.06658	7.45019	6.80063	6.1323	5.46141	4.80439						12.0608	11.3077	11.134	10.9242	10.6729	10.3746	10.0244	9.61874	9.15576	8.63637	8.06482	7.44904	6.80056	6.13382	5.465	4.81048		12.0608	11.3077	11.134	10.9242	10.6729	10.3746	10.0244	9.61874	9.15576	8.63637
[S]6	0.32768	11.4927	10.6502	10.4586	10.2285	9.95471	9.63244	9.25782	8.82861	8.345	7.81022	7.23098	6.61751	5.98301	5.34268	4.71227	4.10657			Sum R2	0.00133173		11.4963	10.6516	10.4595	10.2289	9.95464	9.63189	9.25683	8.82728	8.3435	7.8088	7.22995	6.61724	5.98391	5.34515	4.71666	4.11317		11.4963	10.6516	10.4595	10.2289	9.95464	9.63189	9.25683	8.82728	8.3435	7.8088
[S]7	0.262144	10.858	9.93032	9.72265	9.47497	9.18256	8.84149	8.4492	8.00522	7.51181	6.97447	6.40203	5.80632	5.20134	4.60197	4.02255	3.47556			Sum residuals %	0.100867		10.861	9.93118	9.72313	9.47505	9.18224	8.8408	8.4482	8.00404	7.51062	6.97351	6.40159	5.80672	5.20291	4.60502	4.02731	3.48221		10.861	9.93118	9.72313	9.47505	9.18224	8.8408	8.4482	8.00404	7.51062	6.97351
[S]8	0.209715	10.1568	9.15663	8.93662	8.67604	8.37094	8.01846	7.61752	7.16941	6.67834	6.15164	5.59961	5.03484	4.47115	3.92224	3.40042	2.91556						10.1592	9.15705	8.93672	8.67582	8.3704	8.01766	7.61653	7.16837	6.67742	6.15106	5.59963	5.03572	4.47314	3.92556	3.40522	2.92192		10.1592	9.15705	8.93672	8.67582	8.3704	8.01766	7.61653	7.16837	6.67742	6.15106
[S]9	0.167772	9.39822	8.34402	8.11641	7.84879	7.5381	7.18269	6.78294	6.34175	5.86491	5.36103	4.84113	4.31773	3.80368	3.31094	2.84953	2.42678						9.39994	8.34404	8.11618	7.8483	7.53738	7.18181	6.78198	6.34084	5.86422	5.36075	4.84148	4.3189	3.80587	3.31429	2.85413	2.43266		9.39994	8.34404	8.11618	7.8483	7.53738	7.18181	6.78198	6.34084	5.86422	5.36075
[S]10	0.134218	8.5957	7.51082	7.28108	7.01294	6.70431	6.35474	5.9659	5.54202	5.08995	4.61899	4.14014	3.66518	3.20551	2.77109	2.36966	2.00635						8.59683	7.51051	7.28057	7.01225	6.70348	6.35382	5.96499	5.54123	5.08945	4.61894	4.1407	3.66651	3.20774	2.7743	2.37389	2.01161		8.59683	7.51051	7.28057	7.01225	6.70348	6.35382	5.96499	5.54123	5.08945	4.61894
[S]11	0.107374	7.7667	6.67735	6.45114	6.18906	5.88996	5.55442	5.18518	4.78737	4.36843	3.9377	3.50563	3.0828	2.67891	2.30192	1.95758	1.6492						7.76731	6.67678	6.45043	6.18823	5.88905	5.55349	5.18433	4.7867	4.36808	3.9378	3.5063	3.08416	2.68104	2.30488	1.96137	1.65381		7.76731	6.67678	6.45043	6.18823	5.88905	5.55349	5.18433	4.7867	4.36808	3.9378
[S]12	0.0858993	6.93112	5.86396	5.64661	5.39658	5.11355	4.79894	4.45623	4.09103	3.71089	3.32472	2.94202	2.57196	2.22251	1.89985	1.60803	1.34902						6.93129	5.86321	5.64577	5.39567	5.11261	4.79804	4.45545	4.09047	3.71065	3.32491	2.94273	2.57327	2.22448	1.9025	1.61136	1.35299		6.93129	5.86321	5.64577	5.39567	5.11261	4.79804	4.45545	4.09047	3.71065	3.32491
[S]13	0.0687195	6.1095	5.08906	4.88508	4.652	4.39016	4.10159	3.79018	3.46165	3.12324	2.78315	2.44971	2.13063	1.83231	1.55938	1.31461	1.09898						6.10934	5.0882	4.88417	4.65106	4.38925	4.10075	3.78949	3.46118	3.12309	2.78339	2.45041	2.13185	1.83407	1.5617	1.31747	1.10235		6.10934	5.0882	4.88417	4.65106	4.38925	4.10075	3.78949	3.46118	3.12309	2.78339
[S]14	0.0549756	5.32106	4.36761	4.18035	3.9677	3.7305	3.4711	3.19353	2.90332	2.60717	2.31233	2.02594	1.75434	1.50255	1.27399	1.07045	0.892261						5.32064	4.3667	4.17942	3.96678	3.72963	3.47033	3.19292	2.90293	2.60707	2.31258	2.0266	1.75544	1.5041	1.27598	1.07288	0.895087		5.32064	4.3667	4.17942	3.96678	3.72963	3.47033	3.19292	2.90293	2.60707	2.31258
[S]15	0.0439805	4.58192	3.71015	3.54168	3.35146	3.14061	2.91164	2.66845	2.41619	2.16085	1.90871	1.66575	1.43709	1.22662	1.03681	0.868761	0.722403						4.58135	3.70925	3.54079	3.3506	3.13981	2.91095	2.66792	2.41587	2.16079	1.90896	1.66634	1.43805	1.22794	1.03849	0.870792	0.724751		4.58135	3.70925	3.54079	3.3506	3.13981	2.91095	2.66792	2.41587	2.16079	1.90896
	1	1	1	1	1	1	1	1	1	1	1	1	1	1	1	1	1																					1	1	13.6425	13.2329	13.1344	13.0132	12.8649	12.6843	12.4655	12.2025	11.8891	11.5195
	1	1	1	1	1	1	1	1	1	1	1	1	1	1	1	1	1					13.6364	13.6364	13.6425		0.00617134	0.00617134	5										0.8	0.8	13.3391	12.8534	12.7375	12.5955	12.4224	12.2127	11.9604	11.6593	11.3038	10.889
	1	1	1	1	1	1	1	1	1	1	1	1	1	1	1	1	1					13.3333	13.3333	13.3391		0.00577656	0.00577656	5										0.64	0.64	12.9783	12.4085	12.2738	12.1095	11.9103	11.6703	11.3837	11.0447	10.6485	10.1917
	1	1	1	1	1	1	1	1	1	1	1	1	1	1	1	1	1					12.973	12.973	12.9783		0.00532236	0.00532236	5										0.512	0.512	12.5538	11.8939	11.7397	11.5524	11.3267	11.0566	10.7367	10.362	9.92904	9.43642
	1	1	1	1	1	1	1	1	1	1	1	1	1	1	1	1	1					12.549	12.549	12.5538		0.00480922	0.00480922	5										0.4096	0.4096	12.0608	11.3077	11.134	10.9242	10.6729	10.3746	10.0244	9.61874	9.15576	8.63637
	1	1	1	1	1	1	1	1	1	1	1	1	1	1	1	1	1					12.0565	12.0565	12.0608		0.00424191	0.00424191	5										0.32768	0.32768	11.4963	10.6516	10.4595	10.2289	9.95464	9.63189	9.25683	8.82728	8.3435	7.8088
	1	1	1	1	1	1	1	1	1	1	1	1	1	1	1	1	1					11.4927	11.4927	11.4963		0.00363046	0.00363046	5										0.262144	0.262144	10.861	9.93118	9.72313	9.47505	9.18224	8.8408	8.4482	8.00404	7.51062	6.97351
	1	1	1	1	1	1	1	1	1	1	1	1	1	1	1	1	1					10.858	10.858	10.861		0.00299065	0.00299065	5										0.209715	0.209715	10.1592	9.15705	8.93672	8.67582	8.3704	8.01766	7.61653	7.16837	6.67742	6.15106
	1	1	1	1	1	1	1	1	1	1	1	1	1	1	1	1	1					10.1568	10.1568	10.1592		0.0023436	0.0023436	5										0.167772	0.167772	9.39994	8.34404	8.11618	7.8483	7.53738	7.18181	6.78198	6.34084	5.86422	5.36075
	1	1	1	1	1	1	1	1	1	1	1	1	1	1	1	1	1					9.39822	9.39822	9.39994		0.00171415	0.00171415	5										0.134218	0.134218	8.59683	7.51051	7.28057	7.01225	6.70348	6.35382	5.96499	5.54123	5.08945	4.61894
	1	1	1	1	1	1	1	1	1	1	1	1	1	1	1	1	1					8.5957	8.5957	8.59683		0.00112817	0.00112817	5										0.107374	0.107374	7.76731	6.67678	6.45043	6.18823	5.88905	5.55349	5.18433	4.7867	4.36808	3.9378
	1	1	1	1	1	1	1	1	1	1	1	1	1	1	1	1	1					7.7667	7.7667	7.76731		0.000609091	0.000609091	5										0.0858993	0.0858993	6.93129	5.86321	5.64577	5.39567	5.11261	4.79804	4.45545	4.09047	3.71065	3.32491
	1	1	1	1	1	1	1	1	1	1	1	1	1	1	1	1	1					6.93112	6.93112	6.93129		0.00017456	0.00017456	5										0.0687195	0.0687195	6.10934	5.0882	4.88417	4.65106	4.38925	4.10075	3.78949	3.46118	3.12309	2.78339
	1	1	1	1	1	1	1	1	1	1	1	1	1	1	1	1	1					6.1095	6.1095	6.10934		-0.000165923	-0.000165923	5										0.0549756	0.0549756	5.32064	4.3667	4.17942	3.96678	3.72963	3.47033	3.19292	2.90293	2.60707	2.31258
	1	1	1	1	1	1	1	1	1	1	1	1	1	1	1	1	1					5.32106	5.32106	5.32064		-0.00041176	-0.00041176	5										0.0439805	0.0439805	4.58135	3.70925	3.54079	3.3506	3.13981	2.91095	2.66792	2.41587	2.16079	1.90896
																						4.58192	4.58192	4.58135		-0.000570276	-0.000570276	5
																						13.2295	13.2295	13.2329		0.00344664	0.00344664	5											1	0.0733002	0.0755691	0.0761361	0.0768449	0.0777307	0.0788378	0.0802213	0.0819501	0.0841104	0.0868096
																						12.8503	12.8503	12.8534		0.00309072	0.00309072	5											1.25	0.0749675	0.0778005	0.0785086	0.0793936	0.0804997	0.081882	0.0836095	0.0857682	0.0884656	0.0918359
																						12.4058	12.4058	12.4085		0.00269284	0.00269284	5											1.5625	0.0770517	0.0805899	0.0814742	0.0825795	0.0839609	0.0856872	0.0878447	0.0905408	0.0939096	0.0981188
																						11.8917	11.8917	11.8939		0.00225863	0.00225863	5											1.95312	0.079657	0.0840766	0.0851812	0.0865619	0.0882874	0.0904438	0.0931388	0.0965065	0.100715	0.105972
																						11.3059	11.3059	11.3077		0.00179799	0.00179799	5											2.44141	0.0829135	0.088435	0.089815	0.0915398	0.0936955	0.0963896	0.0997564	0.103964	0.109221	0.115789
																						10.6502	10.6502	10.6516		0.00132528	0.00132528	5											3.05176	0.0869842	0.093883	0.0956072	0.0977623	0.100456	0.103822	0.108028	0.113285	0.119854	0.128061
																						9.93032	9.93032	9.93118		0.000858554	0.000858554	5											3.8147	0.0920726	0.100693	0.102847	0.10554	0.108906	0.113112	0.118368	0.124937	0.133145	0.1434
																						9.15663	9.15663	9.15705		0.000417959	0.000417959	5											4.76837	0.0984331	0.109205	0.111898	0.115263	0.119469	0.124725	0.131293	0.139502	0.149759	0.162574
																						8.34402	8.34402	8.34404		2.32217e-05	2.32217e-05	5											5.96046	0.106384	0.119846	0.123211	0.127416	0.132672	0.139241	0.14745	0.157708	0.170526	0.186541
																						7.51082	7.51082	7.51051		-0.000309153	-0.000309153	5											7.45058	0.116322	0.133147	0.137352	0.142608	0.149176	0.157386	0.167645	0.180465	0.196485	0.2165
																						6.67735	6.67735	6.67678		-0.000568345	-0.000568345	5											9.31323	0.128745	0.149773	0.155028	0.161597	0.169807	0.180067	0.192889	0.208912	0.228934	0.253949
																						5.86396	5.86396	5.86321		-0.00075063	-0.00075063	5											11.6415	0.144273	0.170555	0.177124	0.185334	0.195595	0.208418	0.224444	0.244471	0.269495	0.30076
																						5.08906	5.08906	5.0882		-0.00085937	-0.00085937	5											14.5519	0.163684	0.196533	0.204743	0.215005	0.22783	0.243858	0.263888	0.288919	0.320196	0.359274
																						4.36761	4.36761	4.3667		-0.000903674	-0.000903674	5											18.1899	0.187947	0.229006	0.239268	0.252093	0.268123	0.288157	0.313193	0.344479	0.383572	0.432417
																						3.71015	3.71015	3.70925		-0.000896242	-0.000896242	5											22.7374	0.218276	0.269596	0.282423	0.298454	0.31849	0.343531	0.374824	0.413929	0.462793	0.523845
																						13.1315	13.1315	13.1344		0.0028402	0.0028402	5
																						12.7349	12.7349	12.7375		0.00250764	0.00250764	5												13.6364	13.2295	13.1315	13.0111	12.8637	12.684	12.4663	12.2045	11.8923	11.5238
																						12.2717	12.2717	12.2738		0.00213862	0.00213862	5												13.3333	12.8503	12.7349	12.5937	12.4214	12.2126	11.9612	11.6612	11.3067	10.8928
																						11.7379	11.7379	11.7397		0.00173949	0.00173949	5												12.973	12.4058	12.2717	12.108	11.9095	11.6704	11.3846	11.0465	10.6511	10.1949
																						11.1327	11.1327	11.134		0.00132058	0.00132058	5												12.549	11.8917	11.7379	11.5513	11.3262	11.0568	10.7376	10.3636	9.93121	9.43896
																						10.4586	10.4586	10.4595		0.000896179	0.000896179	5												12.0565	11.3059	11.1327	10.9234	10.6727	10.375	10.0254	9.62021	9.15758	8.63832
																						9.72265	9.72265	9.72313		0.000483585	0.000483585	5												11.4927	10.6502	10.4586	10.2285	9.95471	9.63244	9.25782	8.82861	8.345	7.81022
																						8.93662	8.93662	8.93672		0.00010136	0.00010136	5												10.858	9.93032	9.72265	9.47497	9.18256	8.84149	8.4492	8.00522	7.51181	6.97447
																						8.11641	8.11641	8.11618		-0.000233107	-0.000233107	5												10.1568	9.15663	8.93662	8.67604	8.37094	8.01846	7.61752	7.16941	6.67834	6.15164
																						7.28108	7.28108	7.28057		-0.000506168	-0.000506168	5												9.39822	8.34402	8.11641	7.84879	7.5381	7.18269	6.78294	6.34175	5.86491	5.36103
																						6.45114	6.45114	6.45043		-0.000709942	-0.000709942	5												8.5957	7.51082	7.28108	7.01294	6.70431	6.35474	5.9659	5.54202	5.08995	4.61899
																						5.64661	5.64661	5.64577		-0.000843243	-0.000843243	5												7.7667	6.67735	6.45114	6.18906	5.88996	5.55442	5.18518	4.78737	4.36843	3.9377
																						4.88508	4.88508	4.88417		-0.000911168	-0.000911168	5												6.93112	5.86396	5.64661	5.39658	5.11355	4.79894	4.45623	4.09103	3.71089	3.32472
																						4.18035	4.18035	4.17942		-0.000923561	-0.000923561	5												6.1095	5.08906	4.88508	4.652	4.39016	4.10159	3.79018	3.46165	3.12324	2.78315
																						3.54168	3.54168	3.54079		-0.000892894	-0.000892894	5												5.32106	4.36761	4.18035	3.9677	3.7305	3.4711	3.19353	2.90332	2.60717	2.31233
																						13.0111	13.0111	13.0132		0.00212098	0.00212098	5												4.58192	3.71015	3.54168	3.35146	3.14061	2.91164	2.66845	2.41619	2.16085	1.90871
																						12.5937	12.5937	12.5955		0.00182392	0.00182392	5
																						12.108	12.108	12.1095		0.00149748	0.00149748	5												1/s	0	0.0439805	0.0549756	0.0687195	0.0858993	0.107374	0.134218	0.167772	0.209715
																						11.5513	11.5513	11.5524		0.0011485	0.0011485	5											1	1	0.0733002	0.0755691	0.0761361	0.0768449	0.0777307	0.0788378	0.0802213	0.0819501	0.0841104
																						10.9234	10.9234	10.9242		0.000787367	0.000787367	5											2	1.25	0.0749675	0.0778005	0.0785086	0.0793936	0.0804997	0.081882	0.0836095	0.0857682	0.0884656
																						10.2285	10.2285	10.2289		0.000427699	0.000427699	5											3	1.5625	0.0770517	0.0805899	0.0814742	0.0825795	0.0839609	0.0856872	0.0878447	0.0905408	0.0939096
																						9.47497	9.47497	9.47505		8.52823e-05	8.52823e-05	5											4	1.95312	0.079657	0.0840766	0.0851812	0.0865619	0.0882874	0.0904438	0.0931388	0.0965065	0.100715
																						8.67604	8.67604	8.67582		-0.000223744	-0.000223744	5											5	2.44141	0.0829135	0.088435	0.089815	0.0915398	0.0936955	0.0963896	0.0997564	0.103964	0.109221
																						7.84879	7.84879	7.8483		-0.000485129	-0.000485129	5											6	3.05176	0.0869842	0.093883	0.0956072	0.0977623	0.100456	0.103822	0.108028	0.113285	0.119854
																						7.01294	7.01294	7.01225		-0.000688682	-0.000688682	5											7	3.8147	0.0920726	0.100693	0.102847	0.10554	0.108906	0.113112	0.118368	0.124937	0.133145
																						6.18906	6.18906	6.18823		-0.000829767	-0.000829767	5											8	4.76837	0.0984331	0.109205	0.111898	0.115263	0.119469	0.124725	0.131293	0.139502	0.149759
																						5.39658	5.39658	5.39567		-0.000909697	-0.000909697	5											9	5.96046	0.106384	0.119846	0.123211	0.127416	0.132672	0.139241	0.14745	0.157708	0.170526
																						4.652	4.652	4.65106		-0.000934963	-0.000934963	5											10	7.45058	0.116322	0.133147	0.137352	0.142608	0.149176	0.157386	0.167645	0.180465	0.196485
																						3.9677	3.9677	3.96678		-0.000915613	-0.000915613	5											11	9.31323	0.128745	0.149773	0.155028	0.161597	0.169807	0.180067	0.192889	0.208912	0.228934
																						3.35146	3.35146	3.3506		-0.000863297	-0.000863297	5											12	11.6415	0.144273	0.170555	0.177124	0.185334	0.195595	0.208418	0.224444	0.244471	0.269495
																						12.8637	12.8637	12.8649		0.0012798	0.0012798	5											13	14.5519	0.163684	0.196533	0.204743	0.215005	0.22783	0.243858	0.263888	0.288919	0.320196
																						12.4214	12.4214	12.4224		0.00103586	0.00103586	5											14	18.1899	0.187947	0.229006	0.239268	0.252093	0.268123	0.288157	0.313193	0.344479	0.383572
																						11.9095	11.9095	11.9103		0.000771336	0.000771336	5											15	22.7374	0.218276	0.269596	0.282423	0.298454	0.31849	0.343531	0.374824	0.413929	0.462793
																						11.3262	11.3262	11.3267		0.000493098	0.000493098	5
																						10.6727	10.6727	10.6729		0.000210848	0.000210848	5
																						9.95471	9.95471	9.95464		-6.34003e-05	-6.34003e-05	5
																						9.18256	9.18256	9.18224		-0.000316467	-0.000316467	5
																						8.37094	8.37094	8.3704		-0.000535687	-0.000535687	5
																						7.5381	7.5381	7.53738		-0.000710795	-0.000710795	5
																						6.70431	6.70431	6.70348		-0.000835532	-0.000835532	5
																						5.88996	5.88996	5.88905		-0.000908525	-0.000908525	5
																						5.11355	5.11355	5.11261		-0.00093318	-0.00093318	5
																						4.39016	4.39016	4.38925		-0.000916681	-0.000916681	5
																						3.7305	3.7305	3.72963		-0.000868446	-0.000868446	5
																						3.14061	3.14061	3.13981		-0.000798501	-0.000798501	5
																						12.684	12.684	12.6843		0.000313531	0.000313531	5
																						12.2126	12.2126	12.2127		0.000147657	0.000147657	5
																						11.6704	11.6704	11.6703		-2.83911e-05	-2.83911e-05	5
																						11.0568	11.0568	11.0566		-0.000208623	-0.000208623	5
																						10.375	10.375	10.3746		-0.00038524	-0.00038524	5
																						9.63244	9.63244	9.63189		-0.000549236	-0.000549236	5
																						8.84149	8.84149	8.8408		-0.000691437	-0.000691437	5
																						8.01846	8.01846	8.01766		-0.000803819	-0.000803819	5
																						7.18269	7.18269	7.18181		-0.000880805	-0.000880805	5
																						6.35474	6.35474	6.35382		-0.000920173	-0.000920173	5
																						5.55442	5.55442	5.55349		-0.000923325	-0.000923325	5
																						4.79894	4.79894	4.79804		-0.000894821	-0.000894821	5
																						4.10159	4.10159	4.10075		-0.000841379	-0.000841379	5
																						3.4711	3.4711	3.47033		-0.000770641	-0.000770641	5
																						2.91164	2.91164	2.91095		-0.000690046	-0.000690046	5
																						12.4663	12.4663	12.4655		-0.000770559	-0.000770559	5
																						11.9612	11.9612	11.9604		-0.000824041	-0.000824041	5
																						11.3846	11.3846	11.3837		-0.000876347	-0.000876347	5
																						10.7376	10.7376	10.7367		-0.00092394	-0.00092394	5
																						10.0254	10.0254	10.0244		-0.000962755	-0.000962755	5
																						9.25782	9.25782	9.25683		-0.000988662	-0.000988662	5
																						8.4492	8.4492	8.4482		-0.000998085	-0.000998085	5
																						7.61752	7.61752	7.61653		-0.000988651	-0.000988651	5
																						6.78294	6.78294	6.78198		-0.000959688	-0.000959688	5
																						5.9659	5.9659	5.96499		-0.000912415	-0.000912415	5
																						5.18518	5.18518	5.18433		-0.000849757	-0.000849757	5
																						4.45623	4.45623	4.45545		-0.000775828	-0.000775828	5
																						3.79018	3.79018	3.78949		-0.000695253	-0.000695253	5
																						3.19353	3.19353	3.19292		-0.000612514	-0.000612514	5
																						2.66845	2.66845	2.66792		-0.000531443	-0.000531443	5
																						12.2045	12.2045	12.2025		-0.00194909	-0.00194909	5
																						11.6612	11.6612	11.6593		-0.00184459	-0.00184459	5
																						11.0465	11.0465	11.0447		-0.00172835	-0.00172835	5
																						10.3636	10.3636	10.362		-0.0016017	-0.0016017	5
																						9.62021	9.62021	9.61874		-0.0014668	-0.0014668	5
																						8.82861	8.82861	8.82728		-0.00132654	-0.00132654	5
																						8.00522	8.00522	8.00404		-0.00118438	-0.00118438	5
																						7.16941	7.16941	7.16837		-0.00104395	-0.00104395	5
																						6.34175	6.34175	6.34084		-0.00090874	-0.00090874	5
																						5.54202	5.54202	5.54123		-0.000781738	-0.000781738	5
																						4.78737	4.78737	4.7867		-0.000665179	-0.000665179	5
																						4.09103	4.09103	4.09047		-0.000560454	-0.000560454	5
																						3.46165	3.46165	3.46118		-0.000468133	-0.000468133	5
																						2.90332	2.90332	2.90293		-0.000388092	-0.000388092	5
																						2.41619	2.41619	2.41587		-0.000319682	-0.000319682	5
																						11.8923	11.8923	11.8891		-0.00317562	-0.00317562	5
																						11.3067	11.3067	11.3038		-0.00285533	-0.00285533	5
																						10.6511	10.6511	10.6485		-0.00251689	-0.00251689	5
																						9.93121	9.93121	9.92904		-0.00216981	-0.00216981	5
																						9.15758	9.15758	9.15576		-0.00182539	-0.00182539	5
																						8.345	8.345	8.3435		-0.00149553	-0.00149553	5
																						7.51181	7.51181	7.51062		-0.00119126	-0.00119126	5
																						6.67834	6.67834	6.67742		-0.000921258	-0.000921258	5
																						5.86491	5.86491	5.86422		-0.000690921	-0.000690921	5
																						5.08995	5.08995	5.08945		-0.000501953	-0.000501953	5
																						4.36843	4.36843	4.36808		-0.000352748	-0.000352748	5
																						3.71089	3.71089	3.71065		-0.000239227	-0.000239227	5
																						3.12324	3.12324	3.12309		-0.000155892	-0.000155892	5
																						2.60717	2.60717	2.60707		-9.68109e-05	-9.68109e-05	5
																						2.16085	2.16085	2.16079		-5.63531e-05	-5.63531e-05	5
																						11.5238	11.5238	11.5195		-0.00437325	-0.00437325	5
																						10.8928	10.8928	10.889		-0.00376822	-0.00376822	5
																						10.1949	10.1949	10.1917		-0.00314844	-0.00314844	5
																						9.43896	9.43896	9.43642		-0.00253553	-0.00253553	5
																						8.63832	8.63832	8.63637		-0.00195261	-0.00195261	5
																						7.81022	7.81022	7.8088		-0.0014214	-0.0014214	5
																						6.97447	6.97447	6.97351		-0.000959219	-0.000959219	5
																						6.15164	6.15164	6.15106		-0.000576759	-0.000576759	5
																						5.36103	5.36103	5.36075		-0.000277123	-0.000277123	5
																						4.61899	4.61899	4.61894		-5.63892e-05	-5.63892e-05	5
																						3.9377	3.9377	3.9378		9.46865e-05	9.46865e-05	5
																						3.32472	3.32472	3.32491		0.000188405	0.000188405	5
																						2.78315	2.78315	2.78339		0.000237934	0.000237934	5
																						2.31233	2.31233	2.31258		0.000255627	0.000255627	5
																						1.90871	1.90871	1.90896		0.000252013	0.000252013	5
																						11.0942	11.0942	11.0887		-0.00542832	-0.00542832	5
																						10.4161	10.4161	10.4116		-0.00446313	-0.00446313	5
																						9.67682	9.67682	9.67331		-0.00350468	-0.00350468	5
																						8.88826	8.88826	8.88567		-0.00259033	-0.00259033	5
																						8.06658	8.06658	8.06482		-0.00175618	-0.00175618	5
																						7.23098	7.23098	7.22995		-0.00103208	-0.00103208	5
																						6.40203	6.40203	6.40159		-0.000437473	-0.000437473	5
																						5.59961	5.59961	5.59963		2.06745e-05	2.06745e-05	5
																						4.84113	4.84113	4.84148		0.000347509	0.000347509	5
																						4.14014	4.14014	4.1407		0.000557763	0.000557763	5
																						3.50563	3.50563	3.5063		0.000672019	0.000672019	5
																						2.94202	2.94202	2.94273		0.000712887	0.000712887	5
																						2.44971	2.44971	2.45041		0.000701911	0.000701911	5
																						2.02594	2.02594	2.0266		0.000657604	0.000657604	5
																						1.66575	1.66575	1.66634		0.000594584	0.000594584	5
																						10.6001	10.6001	10.5939		-0.00618757	-0.00618757	5
																						9.87592	9.87592	9.87113		-0.00479014	-0.00479014	5
																						9.09886	9.09886	9.09541		-0.00344953	-0.00344953	5
																						8.2841	8.2841	8.28188		-0.00222044	-0.00222044	5
																						7.45019	7.45019	7.44904		-0.00114971	-0.00114971	5
																						6.61751	6.61751	6.61724		-0.000269634	-0.000269634	5
																						5.80632	5.80632	5.80672		0.000405991	0.000405991	5
																						5.03484	5.03484	5.03572		0.000882079	0.000882079	5
																						4.31773	4.31773	4.3189		0.00117904	0.00117904	5
																						3.66518	3.66518	3.66651		0.00132734	0.00132734	5
																						3.0828	3.0828	3.08416		0.00136155	0.00136155	5
																						2.57196	2.57196	2.57327		0.00131535	0.00131535	5
																						2.13063	2.13063	2.13185		0.00121806	0.00121806	5
																						1.75434	1.75434	1.75544		0.00109311	0.00109311	5
																						1.43709	1.43709	1.43805		0.000957709	0.000957709	5
																						10.0412	10.0412	10.0347		-0.00646208	-0.00646208	5
																						9.27467	9.27467	9.27009		-0.00457949	-0.00457949	5
																						8.46676	8.46676	8.46391		-0.0028434	-0.0028434	5
																						7.63536	7.63536	7.63404		-0.00132288	-0.00132288	5
																						6.80063	6.80063	6.80056		-6.7845e-05	-6.7845e-05	5
																						5.98301	5.98301	5.98391		0.000897494	0.000897494	5
																						5.20134	5.20134	5.20291		0.00157603	0.00157603	5
																						4.47115	4.47115	4.47314		0.00199399	0.00199399	5
																						3.80368	3.80368	3.80587		0.00219354	0.00219354	5
																						3.20551	3.20551	3.20774		0.00222419	0.00222419	5
																						2.67891	2.67891	2.68104		0.00213521	0.00213521	5
																						2.22251	2.22251	2.22448		0.00197023	0.00197023	5
																						1.83231	1.83231	1.83407		0.00176445	0.00176445	5
																						1.50255	1.50255	1.5041		0.00154404	0.00154404	5
																						1.22662	1.22662	1.22794		0.00132684	0.00132684	5
																						9.42029	9.42029	9.41425		-0.00604074	-0.00604074	5
																						8.61878	8.61878	8.61512		-0.00366035	-0.00366035	5
																						7.79026	7.79026	7.7887		-0.00156385	-0.00156385	5
																						6.95458	6.95458	6.95476		0.000175554	0.000175554	5
																						6.1323	6.1323	6.13382		0.00151901	0.00151901	5
																						5.34268	5.34268	5.34515		0.00246526	0.00246526	5
																						4.60197	4.60197	4.60502		0.00304647	0.00304647	5
																						3.92224	3.92224	3.92556		0.00331868	0.00331868	5
																						3.31094	3.31094	3.31429		0.00334989	0.00334989	5
																						2.77109	2.77109	2.7743		0.00320918	0.00320918	5
																						2.30192	2.30192	2.30488		0.00295866	0.00295866	5
																						1.89985	1.89985	1.9025		0.00264904	0.00264904	5
																						1.55938	1.55938	1.5617		0.00231832	0.00231832	5
																						1.27399	1.27399	1.27598		0.00199267	0.00199267	5
																						1.03681	1.03681	1.03849		0.00168841	0.00168841	5
																						8.74439	8.74439	8.73968		-0.00471468	-0.00471468	5
																						7.91878	7.91878	7.91689		-0.00188719	-0.00188719	5
																						7.08286	7.08286	7.08333		0.00047079	0.00047079	5
																						6.25721	6.25721	6.25951		0.00230075	0.00230075	5
																						5.46141	5.46141	5.465		0.00359471	0.00359471	5
																						4.71227	4.71227	4.71666		0.00439103	0.00439103	5
																						4.02255	4.02255	4.02731		0.00476224	0.00476224	5
																						3.40042	3.40042	3.40522		0.00479918	0.00479918	5
																						2.84953	2.84953	2.85413		0.00459588	0.00459588	5
																						2.36966	2.36966	2.37389		0.00423801	0.00423801	5
																						1.95758	1.95758	1.96137		0.0037963	0.0037963	5
																						1.60803	1.60803	1.61136		0.00332423	0.00332423	5
																						1.31461	1.31461	1.31747		0.00285892	0.00285892	5
																						1.07045	1.07045	1.07288		0.00242367	0.00242367	5
																						0.868761	0.868761	0.870792		0.00203121	0.00203121	5
																						8.02469	8.02469	8.02238		-0.00231067	-0.00231067	5
																						7.18894	7.18894	7.18977		0.000831053	0.000831053	5
																						6.36086	6.36086	6.36414		0.00328072	0.00328072	5
																						5.56026	5.56026	5.56528		0.00502066	0.00502066	5
																						4.80439	4.80439	4.81048		0.00609574	0.00609574	5
																						4.10657	4.10657	4.11317		0.00659827	0.00659827	5
																						3.47556	3.47556	3.48221		0.00664725	0.00664725	5
																						2.91556	2.91556	2.92192		0.00636794	0.00636794	5
																						2.42678	2.42678	2.43266		0.00587588	0.00587588	5
																						2.00635	2.00635	2.01161		0.00526733	0.00526733	5
																						1.6492	1.6492	1.65381		0.00461569	0.00461569	5
																						1.34902	1.34902	1.35299		0.00397226	0.00397226	5
																						1.09898	1.09898	1.10235		0.00336952	0.00336952	5
																						0.892261	0.892261	0.895087		0.00282533	0.00282533	5
																						0.722403	0.722403	0.724751		0.00234712	0.00234712	5
[truncated: 54 more columns]
