# Supplementary material for: Comparing enzyme activity modifier equations through the development of global data fitting templates in Excel
Source: PeerJ. 2018 Dec 14;6:e6082. doi: 10.7717/peerj.6082 (PMC6296338; doi:10.7717/peerj.6082)
Supplement: Supplemental Information 23 [file peerj-06-6082-s023.xlsx]

## Sheet: Raw data and fitting summary
		No Inhibitor	[I]1	[I]2	[I]3	[I]4	[I]5	[I]6	[I]7	[I]8	[I]9	[I]10	[I]11	[I]12	[I]13	[I]14	[I]15
		0	0.0439805	0.0549756	0.0687195	0.0858993	0.107374	0.134218	0.167772	0.209715	0.262144	0.32768	0.4096	0.512	0.64	0.8	1
[S]1	1	13.6364	10.4289	9.8497	9.2103	8.51903	7.78834	7.03418	6.27469	5.52854	4.8131	4.14294	3.52877	2.9771	2.49042	2.06787	1.70604
[S]2	0.8	13.3333	10.2507	9.69062	9.07106	8.39977	7.68854	6.95267	6.20975	5.47806	4.7748	4.11453	3.50814	2.9624	2.48013	2.06077	1.7012
[S]3	0.64	12.973	10.0364	9.49885	8.90281	8.2553	7.56733	6.8534	6.13044	5.41625	4.72777	4.07956	3.48269	2.94423	2.46738	2.05196	1.69519
[S]4	0.512	12.549	9.78076	9.26955	8.70108	8.08156	7.42109	6.73323	6.03411	5.34092	4.67027	4.03668	3.45138	2.92183	2.45163	2.04105	1.68774
[S]5	0.4096	12.0565	9.47896	8.99804	8.46142	7.87441	7.24604	6.58882	5.91787	5.24965	4.60033	3.98432	3.41304	2.8943	2.43222	2.02758	1.67852
[S]6	0.32768	11.4927	9.12694	8.68023	8.17979	7.62994	7.03852	6.41678	5.77872	5.13986	4.5158	3.92076	3.36629	2.86061	2.40838	2.01099	1.66713
[S]7	0.262144	10.858	8.72204	8.3132	7.85307	7.3449	6.79525	6.21398	5.61372	5.00891	4.41441	3.8441	3.30962	2.81959	2.37924	1.99063	1.65312
[S]8	0.209715	10.1568	8.26379	7.89587	7.47962	7.01721	6.51383	5.97781	5.42027	4.85432	4.2939	3.75239	3.24142	2.76993	2.34378	1.96575	1.63592
[S]9	0.167772	9.39822	7.75451	7.42966	7.05996	6.64655	6.19322	5.7067	5.19642	4.674	4.1522	3.64373	3.16001	2.71027	2.30092	1.93551	1.61493
[S]10	0.134218	8.5957	7.19988	6.91899	6.59727	6.23487	5.83428	5.40054	4.94134	4.46661	3.98772	3.51644	3.06383	2.63921	2.2495	1.899	1.58943
[S]11	0.107374	7.7667	6.609	6.37156	6.09772	5.78684	5.44015	5.06113	4.65567	4.23189	3.79957	3.36932	2.95154	2.55546	2.18838	1.85525	1.55866
[S]12	0.0858993	6.93112	5.99409	5.79813	5.57048	5.30989	5.01654	4.69249	4.3419	3.97104	3.58796	3.20187	2.82224	2.45796	2.11648	1.80332	1.52184
[S]13	0.0687195	6.1095	5.3696	5.21181	5.02714	4.81393	4.57157	4.30091	4.00454	3.68697	3.35444	3.01459	2.67572	2.34608	2.033	1.74236	1.4782
[S]14	0.0549756	5.32106	4.75089	4.62695	4.48082	4.31065	4.11529	3.89465	3.65004	3.38434	3.10207	2.8092	2.51266	2.21977	1.93747	1.67171	1.42704
[S]15	0.0439805	4.58192	4.15277	4.05775	3.94493	3.81243	3.65881	3.48337	3.28638	3.06941	2.83542	2.58873	2.33481	2.07981	1.82998	1.59108	1.36786
		Direct linear plot Km, Vmax estimates
							0.679231	1	13.6364	1	1	1	13.6364	1	13.6364
		Km	0.1				0.677742	0.8	13.3333	1	1	0.8	13.3333	0.8	13.3333
		Vmax	15					0.64	12.973	1	1	0.64	12.973	0.64	12.973
								0.512	12.549	1	1	0.512	12.549	0.512	12.549
	Ki estimate based on linear decrease in activity							0.4096	12.0565	1	1	0.4096	12.0565	0.4096	12.0565
								0.32768	11.4927	1	1	0.32768	11.4927	0.32768	11.4927
		Ki	0.679231					0.262144	10.858	1	1	0.262144	10.858	0.262144	10.858
								0.209715	10.1568	1	1	0.209715	10.1568	0.209715	10.1568
								0.167772	9.39822	1	1	0.167772	9.39822	0.167772	9.39822
								0.134218	8.5957	1	1	0.134218	8.5957	0.134218	8.5957
								0.107374	7.7667	1	1	0.107374	7.7667	0.107374	7.7667
								0.0858993	6.93112	1	1	0.0858993	6.93112	0.0858993	6.93112
								0.0687195	6.1095	1	1	0.0687195	6.1095	0.0687195	6.1095
								0.0549756	5.32106	1	1	0.0549756	5.32106	0.0549756	5.32106
								0.0439805	4.58192	1	1	0.0439805	4.58192	0.0439805	4.58192
			Km	Km2	Vmax	Vmax2	Ki	aKi	RSS	RSE	n	k	BIC
		Non-competitive	0.0617629		13.3867		0.182505		21.7369	0.302848	240	3	-243.183
		Competitive	0.0126278		9.94788		0.0103756		416.439	1.32557	240	3	64.5823
		Uncompetitive	0.1		15		0.13		2.60571e-28	1.04855e-15	240	3	-7184.29
		Mixed Non-competitive	0.0999939		14.9998		1708.89	0.130006	6.13733e-07	5.09957e-05	240	4	-2052.61
		Modifier equation	0.0999976	4.56839e-07	14.9999	0	0.130002		6.12764e-08	1.61478e-05	240	5	-2290.4
													Residual distribution
													Non-competitive	Competitive	Uncompetitive	Mixed Non-competitive	Modifier equation
												Minimum value	-1.02832	-3.81254	0	-0.000137128	-8.69061e-05
												First quartile	-0.217618	-1.09773	0	-3.24732e-05	-2.72858e-06
												Median value	0.00746088	-0.602525	0	6.19668e-06	1.95934e-06
					Non-competitive	Competitive	Uncompetitive	Mixed Non-competitive	Modifier equation			Third quartile	0.162735	0.498562	0	2.63334e-05	3.75817e-06
				Q1	-0.217618	-1.09773	0	-3.24732e-05	-2.72858e-06			Maximum value	0.985855	3.14685	0	0.000126076	3.60045e-05
				Min	-1.02832	-3.81254	0	-0.000137128	-8.69061e-05
				Median	0.00746088	-0.602525	0	6.19668e-06	1.95934e-06
				Max	0.985855	3.14685	0	0.000126076	3.60045e-05
				Q3	0.162735	0.498562	0	2.63334e-05	3.75817e-06
	Non-competitive
	Km	0.0617629
	Vmax	13.3867
	Ki	0.182505
	RSS	21.7369
	Competitive
	Km	0.0126278
	Vmax	9.94788
	Ki	0.0103756
	RSS	416.439
	Uncompetitive
	Km	0.1
	Vmax	15
	Ki	0.13
	RSS	2.60571e-28
	Mixed Non-competitive
	Km	0.0999939
	Vmax	14.9998
	Ki	1708.89
	aKi	0.130006
	RSS	6.13733e-07
	Modifier equation
	Km	0.0999976
	Km2	4.56839e-07
	Vmax	14.9999
	Vmax2	0
	Ki	0.130002
	RSS	6.12764e-08

## Sheet: modified direct linear plot
Km/Vmax direct plot
									Intercept points x-axis																				Intercept points x-axis
										Line 1	Line 2	Line 3	Line 4	Line 5	Line 6	Line 7	Line 8	Line 9	Line 10	Line 11	Line 12	Line 13	Line 14	Line 15						Line 1	Line 2	Line 3	Line 4	Line 5	Line 6	Line 7	Line 8	Line 9	Line 10	Line 11	Line 12	Line 13	Line 14	Line 15
			x-intercept	y-interecept					Line 1																				Line 1
[Substrate]		v	[Substrate]/v	1/v					Line 2	0.00666667																			Line 2	0.00666667
1		13.6364	0.0733333	0.0733333					Line 3	0.00666667	0.00666667																		Line 3	0.00666667	0.00666667
0.8		13.3333	0.06	0.075					Line 4	0.00666667	0.00666667	0.00666667																	Line 4	0.00666667	0.00666667	0.00666667
0.64		12.973	0.0493333	0.0770833					Line 5	0.00666667	0.00666667	0.00666667	0.00666667																Line 5	0.00666667	0.00666667	0.00666667	0.00666667
0.512		12.549	0.0408	0.0796875					Line 6	0.00666667	0.00666667	0.00666667	0.00666667	0.00666667															Line 6	0.00666667	0.00666667	0.00666667	0.00666667	0.00666667
0.4096		12.0565	0.0339733	0.0829427					Line 7	0.00666667	0.00666667	0.00666667	0.00666667	0.00666667	0.00666667														Line 7	0.00666667	0.00666667	0.00666667	0.00666667	0.00666667	0.00666667
0.32768		11.4927	0.028512	0.0870117					Line 8	0.00666667	0.00666667	0.00666667	0.00666667	0.00666667	0.00666667	0.00666667													Line 8	0.00666667	0.00666667	0.00666667	0.00666667	0.00666667	0.00666667	0.00666667
0.262144		10.858	0.0241429	0.092098					Line 9	0.00666667	0.00666667	0.00666667	0.00666667	0.00666667	0.00666667	0.00666667	0.00666667												Line 9	0.00666667	0.00666667	0.00666667	0.00666667	0.00666667	0.00666667	0.00666667	0.00666667
0.209715		10.1568	0.0206477	0.0984558					Line 10	0.00666667	0.00666667	0.00666667	0.00666667	0.00666667	0.00666667	0.00666667	0.00666667	0.00666667											Line 10	0.00666667	0.00666667	0.00666667	0.00666667	0.00666667	0.00666667	0.00666667	0.00666667	0.00666667
0.167772		9.39822	0.0178515	0.106403					Line 11	0.00666667	0.00666667	0.00666667	0.00666667	0.00666667	0.00666667	0.00666667	0.00666667	0.00666667	0.00666667										Line 11	0.00666667	0.00666667	0.00666667	0.00666667	0.00666667	0.00666667	0.00666667	0.00666667	0.00666667	0.00666667
0.134218		8.5957	0.0156145	0.116337					Line 12	0.00666667	0.00666667	0.00666667	0.00666667	0.00666667	0.00666667	0.00666667	0.00666667	0.00666667	0.00666667	0.00666667									Line 12	0.00666667	0.00666667	0.00666667	0.00666667	0.00666667	0.00666667	0.00666667	0.00666667	0.00666667	0.00666667	0.00666667
0.107374		7.7667	0.0138249	0.128755					Line 13	0.00666667	0.00666667	0.00666667	0.00666667	0.00666667	0.00666667	0.00666667	0.00666667	0.00666667	0.00666667	0.00666667	0.00666667								Line 13	0.00666667	0.00666667	0.00666667	0.00666667	0.00666667	0.00666667	0.00666667	0.00666667	0.00666667	0.00666667	0.00666667	0.00666667
0.0858993		6.93112	0.0123933	0.144277					Line 14	0.00666667	0.00666667	0.00666667	0.00666667	0.00666667	0.00666667	0.00666667	0.00666667	0.00666667	0.00666667	0.00666667	0.00666667	0.00666667							Line 14	0.00666667	0.00666667	0.00666667	0.00666667	0.00666667	0.00666667	0.00666667	0.00666667	0.00666667	0.00666667	0.00666667	0.00666667	0.00666667
0.0687195		6.1095	0.011248	0.163679					Line 15	0.00666667	0.00666667	0.00666667	0.00666667	0.00666667	0.00666667	0.00666667	0.00666667	0.00666667	0.00666667	0.00666667	0.00666667	0.00666667	0.00666667						Line 15	0.00666667	0.00666667	0.00666667	0.00666667	0.00666667	0.00666667	0.00666667	0.00666667	0.00666667	0.00666667	0.00666667	0.00666667	0.00666667	0.00666667
0.0549756		5.32106	0.0103317	0.187933
0.0439805		4.58192	0.0095987	0.218249
																														Km/Vmax (x-axis):	0.00666667		Km:	0.1
																														Standard dev:	1.6544e-17
Line 1	x	y
	0	0.0733333		Slope:	-1
	0.0733333	0		y-intercept:	0.0733333				1/Intercept points y-axis																				1/Intercept points y-axis
										Line 1	Line 2	Line 3	Line 4	Line 5	Line 6	Line 7	Line 8	Line 9	Line 10	Line 11	Line 12	Line 13	Line 14	Line 15						Line 1	Line 2	Line 3	Line 4	Line 5	Line 6	Line 7	Line 8	Line 9	Line 10	Line 11	Line 12	Line 13	Line 14	Line 15
Line 2	x	y							Line 1																				Line 1
	0	0.075		Slope:	-1.25				Line 2	15																			Line 2	15
	0.06	0		y-intercept:	0.075				Line 3	15	15																		Line 3	15	15
									Line 4	15	15	15																	Line 4	15	15	15
Line 3	x	y							Line 5	15	15	15	15																Line 5	15	15	15	15
	0	0.0770833		Slope:	-1.5625				Line 6	15	15	15	15	15															Line 6	15	15	15	15	15
	0.0493333	0		y-intercept:	0.0770833				Line 7	15	15	15	15	15	15														Line 7	15	15	15	15	15	15
									Line 8	15	15	15	15	15	15	15													Line 8	15	15	15	15	15	15	15
Line 4	x	y							Line 9	15	15	15	15	15	15	15	15												Line 9	15	15	15	15	15	15	15	15
	0	0.0796875		Slope:	-1.95312				Line 10	15	15	15	15	15	15	15	15	15											Line 10	15	15	15	15	15	15	15	15	15
	0.0408	0		y-intercept:	0.0796875				Line 11	15	15	15	15	15	15	15	15	15	15										Line 11	15	15	15	15	15	15	15	15	15	15
									Line 12	15	15	15	15	15	15	15	15	15	15	15									Line 12	15	15	15	15	15	15	15	15	15	15	15
Line 5	x	y							Line 13	15	15	15	15	15	15	15	15	15	15	15	15								Line 13	15	15	15	15	15	15	15	15	15	15	15	15
	0	0.0829427		Slope:	-2.44141				Line 14	15	15	15	15	15	15	15	15	15	15	15	15	15							Line 14	15	15	15	15	15	15	15	15	15	15	15	15	15
	0.0339733	0		y-intercept:	0.0829427				Line 15	15	15	15	15	15	15	15	15	15	15	15	15	15	15						Line 15	15	15	15	15	15	15	15	15	15	15	15	15	15	15
Line 6	x	y
	0	0.0870117		Slope:	-3.05176
	0.028512	0		y-intercept:	0.0870117
Line 7	x	y																												Vmax:	15
	0	0.092098		Slope:	-3.8147																									Standard dev:	1.10385e-14
	0.0241429	0		y-intercept:	0.092098
Line 8	x	y
	0	0.0984558		Slope:	-4.76837
	0.0206477	0		y-intercept:	0.0984558
Line 9	x	y
	0	0.106403		Slope:	-5.96046
	0.0178515	0		y-intercept:	0.106403
Line 10	x	y
	0	0.116337		Slope:	-7.45058
	0.0156145	0		y-intercept:	0.116337
Line 11	x	y										0	0.0733333	0.075	0.0770833	0.0796875	0.0829427	0.0870117	0.092098	0.0984558	0.106403	0.116337	0.128755	0.144277	0.163679	0.187933	0.218249	0	0	0	0
	0	0.128755		Slope:	-9.31323							0.0733333	0
	0.0138249	0		y-intercept:	0.128755							0.06		0
												0.0493333			0
Line 12	x	y										0.0408				0
	0	0.144277		Slope:	-11.6415							0.0339733					0
	0.0123933	0		y-intercept:	0.144277							0.028512						0
												0.0241429							0
Line 13	x	y										0.0206477								0
	0	0.163679		Slope:	-14.5519							0.0178515									0
	0.011248	0		y-intercept:	0.163679							0.0156145										0
												0.0138249											0
Line 14	x	y										0.0123933												0
	0	0.187933		Slope:	-18.1899							0.011248													0
	0.0103317	0		y-intercept:	0.187933							0.0103317														0
												0.0095987															0
Line 15	x	y										0																0
	0	0.218249		Slope:	-22.7374							0																	0
	0.0095987	0		y-intercept:	0.218249							0																		0
												0																			0

## Sheet: Non-competitive
																							Calculated values
		No Inhibitor	[I]1	[I]2	[I]3	[I]4	[I]5	[I]6	[I]7	[I]8	[I]9	[I]10	[I]11	[I]12	[I]13	[I]14	[I]15						No Inhibitor	[I]1	[I]2	[I]3	[I]4	[I]5	[I]6	[I]7	[I]8	[I]9	[I]10	[I]11	[I]12	[I]13	[I]14	[I]15
		0	0.0439805	0.0549756	0.0687195	0.0858993	0.107374	0.134218	0.167772	0.209715	0.262144	0.32768	0.4096	0.512	0.64	0.8	1		Km	Vmax	Ki		0	0.0439805	0.0549756	0.0687195	0.0858993	0.107374	0.134218	0.167772	0.209715	0.262144	0.32768	0.4096	0.512	0.64	0.8	1
[S]1	1	13.6364	10.4289	9.8497	9.2103	8.51903	7.78834	7.03418	6.27469	5.52854	4.8131	4.14294	3.52877	2.9771	2.49042	2.06787	1.70604		0.0617629	13.3867	0.182505		12.608	10.1597	9.68934	9.15926	8.573	7.93789	7.26513	6.56917	5.86668	5.17494	4.51019	3.88619	3.31319	2.79759	2.342	1.94589		12.608	10.1597	9.68934	9.15926	8.573	7.93789	7.26513	6.56917	5.86668	5.17494
[S]2	0.8	13.3333	10.2507	9.69062	9.07106	8.39977	7.68854	6.95267	6.20975	5.47806	4.7748	4.11453	3.50814	2.9624	2.48013	2.06077	1.7012						12.4273	10.0141	9.55045	9.02797	8.45011	7.82411	7.16099	6.47501	5.78259	5.10076	4.44554	3.83048	3.2657	2.75749	2.30843	1.918		12.4273	10.0141	9.55045	9.02797	8.45011	7.82411	7.16099	6.47501	5.78259	5.10076
[S]3	0.64	12.973	10.0364	9.49885	8.90281	8.2553	7.56733	6.8534	6.13044	5.41625	4.72777	4.07956	3.48269	2.94423	2.46738	2.05196	1.69519						12.2086	9.83783	9.38234	8.86906	8.30137	7.68639	7.03494	6.36103	5.6808	5.01097	4.36729	3.76306	3.20822	2.70895	2.2678	1.88424		12.2086	9.83783	9.38234	8.86906	8.30137	7.68639	7.03494	6.36103	5.6808	5.01097
[S]4	0.512	12.549	9.78076	9.26955	8.70108	8.08156	7.42109	6.73323	6.03411	5.34092	4.67027	4.03668	3.45138	2.92183	2.45163	2.04105	1.68774						11.9457	9.62603	9.18035	8.67812	8.12265	7.52091	6.88348	6.22409	5.5585	4.90309	4.27326	3.68204	3.13915	2.65063	2.21898	1.84368		11.9457	9.62603	9.18035	8.67812	8.12265	7.52091	6.88348	6.22409	5.5585	4.90309
[S]5	0.4096	12.0565	9.47896	8.99804	8.46142	7.87441	7.24604	6.58882	5.91787	5.24965	4.60033	3.98432	3.41304	2.8943	2.43222	2.02758	1.67852						11.6327	9.37377	8.93977	8.4507	7.90979	7.32382	6.70309	6.06098	5.41283	4.7746	4.16128	3.58555	3.05688	2.58117	2.16083	1.79536		11.6327	9.37377	8.93977	8.4507	7.90979	7.32382	6.70309	6.06098	5.41283	4.7746
[S]6	0.32768	11.4927	9.12694	8.68023	8.17979	7.62994	7.03852	6.41678	5.77872	5.13986	4.5158	3.92076	3.36629	2.86061	2.40838	2.01099	1.66713			Sum R2	21.7369		11.2637	9.07644	8.65621	8.18265	7.6589	7.09151	6.49048	5.86873	5.24114	4.62316	4.02929	3.47182	2.95992	2.49929	2.09229	1.73841		11.2637	9.07644	8.65621	8.18265	7.6589	7.09151	6.49048	5.86873	5.24114	4.62316
[S]7	0.262144	10.858	8.72204	8.3132	7.85307	7.3449	6.79525	6.21398	5.61372	5.00891	4.41441	3.8441	3.30962	2.81959	2.37924	1.99063	1.65312			Sum residuals %	18.1242		10.8341	8.7303	8.3261	7.8706	7.36682	6.82107	6.24296	5.64492	5.04127	4.44685	3.87563	3.33942	2.84704	2.40398	2.0125	1.67212		10.8341	8.7303	8.3261	7.8706	7.36682	6.82107	6.24296	5.64492	5.04127	4.44685
[S]8	0.209715	10.1568	8.26379	7.89587	7.47962	7.01721	6.51383	5.97781	5.42027	4.85432	4.2939	3.75239	3.24142	2.76993	2.34378	1.96575	1.63592						10.3412	8.33306	7.94725	7.51247	7.03162	6.5107	5.9589	5.38807	4.81188	4.24451	3.69928	3.18747	2.7175	2.2946	1.92092	1.59603		10.3412	8.33306	7.94725	7.51247	7.03162	6.5107	5.9589	5.38807	4.81188	4.24451
[S]9	0.167772	9.39822	7.75451	7.42966	7.05996	6.64655	6.19322	5.7067	5.19642	4.674	4.1522	3.64373	3.16001	2.71027	2.30092	1.93551	1.61493						9.78466	7.88461	7.51956	7.10819	6.65321	6.16033	5.63821	5.09811	4.55293	4.01609	3.5002	3.01594	2.57126	2.17111	1.81755	1.51014		9.78466	7.88461	7.51956	7.10819	6.65321	6.16033	5.63821	5.09811	4.55293	4.01609
[S]10	0.134218	8.5957	7.19988	6.91899	6.59727	6.23487	5.83428	5.40054	4.94134	4.46661	3.98772	3.51644	3.06383	2.63921	2.2495	1.899	1.58943						9.16794	7.38765	7.04561	6.66016	6.23386	5.77204	5.28284	4.77677	4.26596	3.76296	3.27959	2.82584	2.40919	2.03427	1.70299	1.41496		9.16794	7.38765	7.04561	6.66016	6.23386	5.77204	5.28284	4.77677	4.26596	3.76296
[S]11	0.107374	7.7667	6.609	6.37156	6.09772	5.78684	5.44015	5.06113	4.65567	4.23189	3.79957	3.36932	2.95154	2.55546	2.18838	1.85525	1.55866						8.49838	6.84811	6.53105	6.17375	5.77858	5.35049	4.89702	4.42791	3.9544	3.48814	3.04007	2.61946	2.23324	1.8857	1.57861	1.31162		8.49838	6.84811	6.53105	6.17375	5.77858	5.35049	4.89702	4.42791	3.9544	3.48814
[S]12	0.0858993	6.93112	5.99409	5.79813	5.57048	5.30989	5.01654	4.69249	4.3419	3.97104	3.58796	3.20187	2.82224	2.45796	2.11648	1.80332	1.52184						7.78745	6.27523	5.9847	5.65729	5.29518	4.9029	4.48736	4.0575	3.6236	3.19634	2.78575	2.40033	2.04642	1.72795	1.44656	1.2019		7.78745	6.27523	5.9847	5.65729	5.29518	4.9029	4.48736	4.0575	3.6236	3.19634
[S]13	0.0687195	6.1095	5.3696	5.21181	5.02714	4.81393	4.57157	4.30091	4.00454	3.68697	3.35444	3.01459	2.67572	2.34608	2.033	1.74236	1.4782						7.05023	5.68117	5.41813	5.12172	4.79389	4.43875	4.06255	3.67338	3.28056	2.89375	2.52203	2.1731	1.85269	1.56437	1.30961	1.08812		7.05023	5.68117	5.41813	5.12172	4.79389	4.43875	4.06255	3.67338	3.28056	2.89375
[S]14	0.0549756	5.32106	4.75089	4.62695	4.48082	4.31065	4.11529	3.89465	3.65004	3.38434	3.10207	2.8092	2.51266	2.21977	1.93747	1.67171	1.42704						6.30421	5.08002	4.84482	4.57977	4.28663	3.96907	3.63267	3.28469	2.93343	2.58755	2.25516	1.94315	1.65665	1.39884	1.17104	0.972977		6.30421	5.08002	4.84482	4.57977	4.28663	3.96907	3.63267	3.28469	2.93343	2.58755
[S]15	0.0439805	4.58192	4.15277	4.05775	3.94493	3.81243	3.65881	3.48337	3.28638	3.06941	2.83542	2.58873	2.33481	2.07981	1.82998	1.59108	1.36786						5.56778	4.48659	4.27886	4.04478	3.78588	3.50542	3.20832	2.90098	2.59076	2.28528	1.99172	1.71616	1.46312	1.23543	1.03424	0.859317		5.56778	4.48659	4.27886	4.04478	3.78588	3.50542	3.20832	2.90098	2.59076	2.28528
	1	1	1	1	1	1	1	1	1	1	1	1	1	1	1	1	1																					1	1	12.608	10.1597	9.68934	9.15926	8.573	7.93789	7.26513	6.56917	5.86668	5.17494
	1	1	1	1	1	1	1	1	1	1	1	1	1	1	1	1	1					13.6364	13.6364	12.608		-1.02832	-1.02832	1										0.8	0.8	12.4273	10.0141	9.55045	9.02797	8.45011	7.82411	7.16099	6.47501	5.78259	5.10076
	1	1	1	1	1	1	1	1	1	1	1	1	1	1	1	1	1					13.3333	13.3333	12.4273		-0.906019	-0.906019	1										0.64	0.64	12.2086	9.83783	9.38234	8.86906	8.30137	7.68639	7.03494	6.36103	5.6808	5.01097
	1	1	1	1	1	1	1	1	1	1	1	1	1	1	1	1	1					12.973	12.973	12.2086		-0.764407	-0.764407	1										0.512	0.512	11.9457	9.62603	9.18035	8.67812	8.12265	7.52091	6.88348	6.22409	5.5585	4.90309
	1	1	1	1	1	1	1	1	1	1	1	1	1	1	1	1	1					12.549	12.549	11.9457		-0.603293	-0.603293	1										0.4096	0.4096	11.6327	9.37377	8.93977	8.4507	7.90979	7.32382	6.70309	6.06098	5.41283	4.7746
	1	1	1	1	1	1	1	1	1	1	1	1	1	1	1	1	1					12.0565	12.0565	11.6327		-0.423839	-0.423839	1										0.32768	0.32768	11.2637	9.07644	8.65621	8.18265	7.6589	7.09151	6.49048	5.86873	5.24114	4.62316
	1	1	1	1	1	1	1	1	1	1	1	1	1	1	1	1	1					11.4927	11.4927	11.2637		-0.229001	-0.229001	1										0.262144	0.262144	10.8341	8.7303	8.3261	7.8706	7.36682	6.82107	6.24296	5.64492	5.04127	4.44685
	1	1	1	1	1	1	1	1	1	1	1	1	1	1	1	1	1					10.858	10.858	10.8341		-0.0238525	-0.0238525	1										0.209715	0.209715	10.3412	8.33306	7.94725	7.51247	7.03162	6.5107	5.9589	5.38807	4.81188	4.24451
	1	1	1	1	1	1	1	1	1	1	1	1	1	1	1	1	1					10.1568	10.1568	10.3412		0.184341	0.184341	1										0.167772	0.167772	9.78466	7.88461	7.51956	7.10819	6.65321	6.16033	5.63821	5.09811	4.55293	4.01609
	1	1	1	1	1	1	1	1	1	1	1	1	1	1	1	1	1					9.39822	9.39822	9.78466		0.386441	0.386441	1										0.134218	0.134218	9.16794	7.38765	7.04561	6.66016	6.23386	5.77204	5.28284	4.77677	4.26596	3.76296
	1	1	1	1	1	1	1	1	1	1	1	1	1	1	1	1	1					8.5957	8.5957	9.16794		0.572238	0.572238	1										0.107374	0.107374	8.49838	6.84811	6.53105	6.17375	5.77858	5.35049	4.89702	4.42791	3.9544	3.48814
	1	1	1	1	1	1	1	1	1	1	1	1	1	1	1	1	1					7.7667	7.7667	8.49838		0.73168	0.73168	1										0.0858993	0.0858993	7.78745	6.27523	5.9847	5.65729	5.29518	4.9029	4.48736	4.0575	3.6236	3.19634
	1	1	1	1	1	1	1	1	1	1	1	1	1	1	1	1	1					6.93112	6.93112	7.78745		0.856335	0.856335	1										0.0687195	0.0687195	7.05023	5.68117	5.41813	5.12172	4.79389	4.43875	4.06255	3.67338	3.28056	2.89375
	1	1	1	1	1	1	1	1	1	1	1	1	1	1	1	1	1					6.1095	6.1095	7.05023		0.940723	0.940723	1										0.0549756	0.0549756	6.30421	5.08002	4.84482	4.57977	4.28663	3.96907	3.63267	3.28469	2.93343	2.58755
	1	1	1	1	1	1	1	1	1	1	1	1	1	1	1	1	1					5.32106	5.32106	6.30421		0.983156	0.983156	1										0.0439805	0.0439805	5.56778	4.48659	4.27886	4.04478	3.78588	3.50542	3.20832	2.90098	2.59076	2.28528
																						4.58192	4.58192	5.56778		0.985855	0.985855	1
		1	1	1	1	1	1	1	1	1	1	1	1	1	1	1	1					10.4289	10.4289	10.1597		-0.269171	-0.269171	1											1	0.0793145	0.0984279	0.103206	0.109179	0.116645	0.125978	0.137644	0.152226	0.170454	0.193239
		1	1	1	1	1	1	1	1	1	1	1	1	1	1	1	1					10.2507	10.2507	10.0141		-0.236629	-0.236629	1											1.25	0.0804679	0.0998592	0.104707	0.110767	0.118342	0.12781	0.139646	0.15444	0.172933	0.196049
		1	1	1	1	1	1	1	1	1	1	1	1	1	1	1	1					10.0364	10.0364	9.83783		-0.198565	-0.198565	1											1.5625	0.0819097	0.101648	0.106583	0.112752	0.120462	0.1301	0.142148	0.157207	0.176032	0.199562
		1	1	1	1	1	1	1	1	1	1	1	1	1	1	1	1					9.78076	9.78076	9.62603		-0.15473	-0.15473	1											1.95312	0.0837119	0.103885	0.108928	0.115232	0.123113	0.132963	0.145275	0.160666	0.179905	0.203953
		1	1	1	1	1	1	1	1	1	1	1	1	1	1	1	1					9.47896	9.47896	9.37377		-0.105196	-0.105196	1											2.44141	0.0859647	0.106681	0.11186	0.118333	0.126426	0.136541	0.149185	0.16499	0.184746	0.209442
		1	1	1	1	1	1	1	1	1	1	1	1	1	1	1	1					9.12694	9.12694	9.07644		-0.0504928	-0.0504928	1											3.05176	0.0887807	0.110175	0.115524	0.12221	0.130567	0.141014	0.154072	0.170395	0.190798	0.216302
		1	1	1	1	1	1	1	1	1	1	1	1	1	1	1	1					8.72204	8.72204	8.7303		0.0082606	0.0082606	1											3.8147	0.0923007	0.114544	0.120104	0.127055	0.135744	0.146605	0.16018	0.17715	0.198363	0.224878
		1	1	1	1	1	1	1	1	1	1	1	1	1	1	1	1					8.26379	8.26379	8.33306		0.0692751	0.0692751	1											4.76837	0.0967007	0.120004	0.12583	0.133112	0.142215	0.153593	0.167816	0.185595	0.207819	0.235598
		1	1	1	1	1	1	1	1	1	1	1	1	1	1	1	1					7.75451	7.75451	7.88461		0.130101	0.130101	1											5.96046	0.102201	0.126829	0.132986	0.140683	0.150303	0.162329	0.177361	0.196151	0.219639	0.248998
		1	1	1	1	1	1	1	1	1	1	1	1	1	1	1	1					7.19988	7.19988	7.38765		0.187773	0.187773	1											7.45058	0.109076	0.135361	0.141932	0.150147	0.160414	0.173249	0.189292	0.209346	0.234414	0.265748
		1	1	1	1	1	1	1	1	1	1	1	1	1	1	1	1					6.609	6.609	6.84811		0.239111	0.239111	1											9.31323	0.11767	0.146026	0.153115	0.161976	0.173053	0.186899	0.204206	0.22584	0.252883	0.286686
		1	1	1	1	1	1	1	1	1	1	1	1	1	1	1	1					5.99409	5.99409	6.27523		0.281142	0.281142	1											11.6415	0.128412	0.159357	0.167093	0.176763	0.188851	0.203961	0.222848	0.246457	0.275969	0.312858
		1	1	1	1	1	1	1	1	1	1	1	1	1	1	1	1					5.3696	5.3696	5.68117		0.311563	0.311563	1											14.5519	0.141839	0.17602	0.184565	0.195247	0.208599	0.225289	0.246151	0.272229	0.304826	0.345573
		1	1	1	1	1	1	1	1	1	1	1	1	1	1	1	1					4.75089	4.75089	5.08002		0.329124	0.329124	1											18.1899	0.158624	0.19685	0.206406	0.218352	0.233283	0.251948	0.275279	0.304443	0.340898	0.386466
		1	1	1	1	1	1	1	1	1	1	1	1	1	1	1	1					4.15277	4.15277	4.48659		0.333819	0.333819	1											22.7374	0.179605	0.222887	0.233707	0.247232	0.264139	0.285273	0.31169	0.344711	0.385988	0.437583
																						9.8497	9.8497	9.68934		-0.160359	-0.160359	1
n	240																					9.69062	9.69062	9.55045		-0.140164	-0.140164	1												13.6364	10.4289	9.8497	9.2103	8.51903	7.78834	7.03418	6.27469	5.52854	4.8131
																						9.49885	9.49885	9.38234		-0.116503	-0.116503	1												13.3333	10.2507	9.69062	9.07106	8.39977	7.68854	6.95267	6.20975	5.47806	4.7748
																						9.26955	9.26955	9.18035		-0.0891993	-0.0891993	1												12.973	10.0364	9.49885	8.90281	8.2553	7.56733	6.8534	6.13044	5.41625	4.72777
																						8.99804	8.99804	8.93977		-0.0582708	-0.0582708	1												12.549	9.78076	9.26955	8.70108	8.08156	7.42109	6.73323	6.03411	5.34092	4.67027
																						8.68023	8.68023	8.65621		-0.0240174	-0.0240174	1												12.0565	9.47896	8.99804	8.46142	7.87441	7.24604	6.58882	5.91787	5.24965	4.60033
																						8.3132	8.3132	8.3261		0.0128947	0.0128947	1												11.4927	9.12694	8.68023	8.17979	7.62994	7.03852	6.41678	5.77872	5.13986	4.5158
																						7.89587	7.89587	7.94725		0.0513751	0.0513751	1												10.858	8.72204	8.3132	7.85307	7.3449	6.79525	6.21398	5.61372	5.00891	4.41441
																						7.42966	7.42966	7.51956		0.0899053	0.0899053	1												10.1568	8.26379	7.89587	7.47962	7.01721	6.51383	5.97781	5.42027	4.85432	4.2939
																						6.91899	6.91899	7.04561		0.12662	0.12662	1												9.39822	7.75451	7.42966	7.05996	6.64655	6.19322	5.7067	5.19642	4.674	4.1522
																						6.37156	6.37156	6.53105		0.159487	0.159487	1												8.5957	7.19988	6.91899	6.59727	6.23487	5.83428	5.40054	4.94134	4.46661	3.98772
																						5.79813	5.79813	5.9847		0.186569	0.186569	1												7.7667	6.609	6.37156	6.09772	5.78684	5.44015	5.06113	4.65567	4.23189	3.79957
																						5.21181	5.21181	5.41813		0.206327	0.206327	1												6.93112	5.99409	5.79813	5.57048	5.30989	5.01654	4.69249	4.3419	3.97104	3.58796
																						4.62695	4.62695	4.84482		0.217871	0.217871	1												6.1095	5.3696	5.21181	5.02714	4.81393	4.57157	4.30091	4.00454	3.68697	3.35444
																						4.05775	4.05775	4.27886		0.221109	0.221109	1												5.32106	4.75089	4.62695	4.48082	4.31065	4.11529	3.89465	3.65004	3.38434	3.10207
																						9.2103	9.2103	9.15926		-0.0510407	-0.0510407	1												4.58192	4.15277	4.05775	3.94493	3.81243	3.65881	3.48337	3.28638	3.06941	2.83542
																						9.07106	9.07106	9.02797		-0.0430851	-0.0430851	1
																						8.90281	8.90281	8.86906		-0.0337518	-0.0337518	1												1/s	0	0.0439805	0.0549756	0.0687195	0.0858993	0.107374	0.134218	0.167772	0.209715
																						8.70108	8.70108	8.67812		-0.0229651	-0.0229651	1											1	1	0.0793145	0.0984279	0.103206	0.109179	0.116645	0.125978	0.137644	0.152226	0.170454
																						8.46142	8.46142	8.4507		-0.0107248	-0.0107248	1											2	1.25	0.0804679	0.0998592	0.104707	0.110767	0.118342	0.12781	0.139646	0.15444	0.172933
																						8.17979	8.17979	8.18265		0.00285805	0.00285805	1											3	1.5625	0.0819097	0.101648	0.106583	0.112752	0.120462	0.1301	0.142148	0.157207	0.176032
																						7.85307	7.85307	7.8706		0.0175264	0.0175264	1											4	1.95312	0.0837119	0.103885	0.108928	0.115232	0.123113	0.132963	0.145275	0.160666	0.179905
																						7.47962	7.47962	7.51247		0.0328509	0.0328509	1											5	2.44141	0.0859647	0.106681	0.11186	0.118333	0.126426	0.136541	0.149185	0.16499	0.184746
																						7.05996	7.05996	7.10819		0.0482252	0.0482252	1											6	3.05176	0.0887807	0.110175	0.115524	0.12221	0.130567	0.141014	0.154072	0.170395	0.190798
																						6.59727	6.59727	6.66016		0.0628943	0.0628943	1											7	3.8147	0.0923007	0.114544	0.120104	0.127055	0.135744	0.146605	0.16018	0.17715	0.198363
																						6.09772	6.09772	6.17375		0.0760235	0.0760235	1											8	4.76837	0.0967007	0.120004	0.12583	0.133112	0.142215	0.153593	0.167816	0.185595	0.207819
																						5.57048	5.57048	5.65729		0.0868044	0.0868044	1											9	5.96046	0.102201	0.126829	0.132986	0.140683	0.150303	0.162329	0.177361	0.196151	0.219639
																						5.02714	5.02714	5.12172		0.0945785	0.0945785	1											10	7.45058	0.109076	0.135361	0.141932	0.150147	0.160414	0.173249	0.189292	0.209346	0.234414
																						4.48082	4.48082	4.57977		0.0989488	0.0989488	1											11	9.31323	0.11767	0.146026	0.153115	0.161976	0.173053	0.186899	0.204206	0.22584	0.252883
																						3.94493	3.94493	4.04478		0.0998459	0.0998459	1											12	11.6415	0.128412	0.159357	0.167093	0.176763	0.188851	0.203961	0.222848	0.246457	0.275969
																						8.51903	8.51903	8.573		0.053971	0.053971	1											13	14.5519	0.141839	0.17602	0.184565	0.195247	0.208599	0.225289	0.246151	0.272229	0.304826
																						8.39977	8.39977	8.45011		0.0503479	0.0503479	1											14	18.1899	0.158624	0.19685	0.206406	0.218352	0.233283	0.251948	0.275279	0.304443	0.340898
																						8.2553	8.2553	8.30137		0.0460709	0.0460709	1											15	22.7374	0.179605	0.222887	0.233707	0.247232	0.264139	0.285273	0.31169	0.344711	0.385988
																						8.08156	8.08156	8.12265		0.041089	0.041089	1
																						7.87441	7.87441	7.90979		0.0353794	0.0353794	1
																						7.62994	7.62994	7.6589		0.0289632	0.0289632	1
																						7.3449	7.3449	7.36682		0.0219216	0.0219216	1
																						7.01721	7.01721	7.03162		0.0144093	0.0144093	1
																						6.64655	6.64655	6.65321		0.00666117	0.00666117	1
																						6.23487	6.23487	6.23386		-0.00101469	-0.00101469	1
																						5.78684	5.78684	5.77858		-0.0082607	-0.0082607	1
																						5.30989	5.30989	5.29518		-0.0147104	-0.0147104	1
																						4.81393	4.81393	4.79389		-0.0200402	-0.0200402	1
																						4.31065	4.31065	4.28663		-0.0240194	-0.0240194	1
																						3.81243	3.81243	3.78588		-0.0265467	-0.0265467	1
																						7.78834	7.78834	7.93789		0.149551	0.149551	1
																						7.68854	7.68854	7.82411		0.13557	0.13557	1
																						7.56733	7.56733	7.68639		0.119061	0.119061	1
																						7.42109	7.42109	7.52091		0.099824	0.099824	1
																						7.24604	7.24604	7.32382		0.0777742	0.0777742	1
																						7.03852	7.03852	7.09151		0.0529982	0.0529982	1
																						6.79525	6.79525	6.82107		0.0258228	0.0258228	1
																						6.51383	6.51383	6.5107		-0.00312698	-0.00312698	1
																						6.19322	6.19322	6.16033		-0.0328985	-0.0328985	1
																						5.83428	5.83428	5.77204		-0.0622326	-0.0622326	1
																						5.44015	5.44015	5.35049		-0.0896547	-0.0896547	1
																						5.01654	5.01654	4.9029		-0.113639	-0.113639	1
																						4.57157	4.57157	4.43875		-0.132821	-0.132821	1
																						4.11529	4.11529	3.96907		-0.14622	-0.14622	1
																						3.65881	3.65881	3.50542		-0.153396	-0.153396	1
																						7.03418	7.03418	7.26513		0.230943	0.230943	1
																						6.95267	6.95267	7.16099		0.208315	0.208315	1
																						6.8534	6.8534	7.03494		0.181535	0.181535	1
																						6.73323	6.73323	6.88348		0.15025	0.15025	1
																						6.58882	6.58882	6.70309		0.114275	0.114275	1
																						6.41678	6.41678	6.49048		0.0736962	0.0736962	1
																						6.21398	6.21398	6.24296		0.0289822	0.0289822	1
																						5.97781	5.97781	5.9589		-0.0189124	-0.0189124	1
																						5.7067	5.7067	5.63821		-0.0684843	-0.0684843	1
																						5.40054	5.40054	5.28284		-0.117697	-0.117697	1
																						5.06113	5.06113	4.89702		-0.16411	-0.16411	1
																						4.69249	4.69249	4.48736		-0.205129	-0.205129	1
																						4.30091	4.30091	4.06255		-0.238359	-0.238359	1
																						3.89465	3.89465	3.63267		-0.26198	-0.26198	1
																						3.48337	3.48337	3.20832		-0.275048	-0.275048	1
																						6.27469	6.27469	6.56917		0.294477	0.294477	1
																						6.20975	6.20975	6.47501		0.265254	0.265254	1
																						6.13044	6.13044	6.36103		0.230589	0.230589	1
																						6.03411	6.03411	6.22409		0.189975	0.189975	1
																						5.91787	5.91787	6.06098		0.143106	0.143106	1
																						5.77872	5.77872	5.86873		0.0900116	0.0900116	1
																						5.61372	5.61372	5.64492		0.0311994	0.0311994	1
																						5.42027	5.42027	5.38807		-0.0321962	-0.0321962	1
																						5.19642	5.19642	5.09811		-0.0983156	-0.0983156	1
																						4.94134	4.94134	4.77677		-0.164566	-0.164566	1
																						4.65567	4.65567	4.42791		-0.227757	-0.227757	1
																						4.3419	4.3419	4.0575		-0.284402	-0.284402	1
																						4.00454	4.00454	3.67338		-0.331161	-0.331161	1
																						3.65004	3.65004	3.28469		-0.365354	-0.365354	1
																						3.28638	3.28638	2.90098		-0.385401	-0.385401	1
																						5.52854	5.52854	5.86668		0.33814	0.33814	1
																						5.47806	5.47806	5.78259		0.304523	0.304523	1
																						5.41625	5.41625	5.6808		0.26455	0.26455	1
																						5.34092	5.34092	5.5585		0.21758	0.21758	1
																						5.24965	5.24965	5.41283		0.163183	0.163183	1
																						5.13986	5.13986	5.24114		0.101288	0.101288	1
																						5.00891	5.00891	5.04127		0.0323564	0.0323564	1
																						4.85432	4.85432	4.81188		-0.0424377	-0.0424377	1
																						4.674	4.674	4.55293		-0.121076	-0.121076	1
																						4.46661	4.46661	4.26596		-0.200651	-0.200651	1
																						4.23189	4.23189	3.9544		-0.277486	-0.277486	1
																						3.97104	3.97104	3.6236		-0.347441	-0.347441	1
																						3.68697	3.68697	3.28056		-0.406407	-0.406407	1
																						3.38434	3.38434	2.93343		-0.450907	-0.450907	1
																						3.06941	3.06941	2.59076		-0.478655	-0.478655	1
																						4.8131	4.8131	5.17494		0.361833	0.361833	1
																						4.7748	4.7748	5.10076		0.325958	0.325958	1
																						4.72777	4.72777	5.01097		0.283203	0.283203	1
																						4.67027	4.67027	4.90309		0.232821	0.232821	1
																						4.60033	4.60033	4.7746		0.174267	0.174267	1
																						4.5158	4.5158	4.62316		0.107354	0.107354	1
																						4.41441	4.41441	4.44685		0.0324372	0.0324372	1
																						4.2939	4.2939	4.24451		-0.0493869	-0.0493869	1
																						4.1522	4.1522	4.01609		-0.136115	-0.136115	1
																						3.98772	3.98772	3.76296		-0.22476	-0.22476	1
																						3.79957	3.79957	3.48814		-0.311433	-0.311433	1
																						3.58796	3.58796	3.19634		-0.391623	-0.391623	1
																						3.35444	3.35444	2.89375		-0.460694	-0.460694	1
																						3.10207	3.10207	2.58755		-0.514522	-0.514522	1
																						2.83542	2.83542	2.28528		-0.550137	-0.550137	1
																						4.14294	4.14294	4.51019		0.367246	0.367246	1
																						4.11453	4.11453	4.44554		0.331007	0.331007	1
																						4.07956	4.07956	4.36729		0.287726	0.287726	1
																						4.03668	4.03668	4.27326		0.236587	0.236587	1
																						3.98432	3.98432	4.16128		0.176956	0.176956	1
																						3.92076	3.92076	4.02929		0.108531	0.108531	1
																						3.8441	3.8441	3.87563		0.0315279	0.0315279	1
																						3.75239	3.75239	3.69928		-0.053109	-0.053109	1
																						3.64373	3.64373	3.5002		-0.143527	-0.143527	1
																						3.51644	3.51644	3.27959		-0.236858	-0.236858	1
																						3.36932	3.36932	3.04007		-0.329252	-0.329252	1
																						3.20187	3.20187	2.78575		-0.416113	-0.416113	1
																						3.01459	3.01459	2.52203		-0.492557	-0.492557	1
																						2.8092	2.8092	2.25516		-0.554034	-0.554034	1
																						2.58873	2.58873	1.99172		-0.597005	-0.597005	1
																						3.52877	3.52877	3.88619		0.357413	0.357413	1
																						3.50814	3.50814	3.83048		0.322341	0.322341	1
																						3.48269	3.48269	3.76306		0.280369	0.280369	1
																						3.45138	3.45138	3.68204		0.230657	0.230657	1
																						3.41304	3.41304	3.58555		0.17251	0.17251	1
																						3.36629	3.36629	3.47182		0.105532	0.105532	1
																						3.30962	3.30962	3.33942		0.0297962	0.0297962	1
																						3.24142	3.24142	3.18747		-0.0539455	-0.0539455	1
																						3.16001	3.16001	3.01594		-0.144078	-0.144078	1
																						3.06383	3.06383	2.82584		-0.237992	-0.237992	1
																						2.95154	2.95154	2.61946		-0.332078	-0.332078	1
																						2.82224	2.82224	2.40033		-0.421909	-0.421909	1
																						2.67572	2.67572	2.1731		-0.502626	-0.502626	1
																						2.51266	2.51266	1.94315		-0.569512	-0.569512	1
																						2.33481	2.33481	1.71616		-0.61865	-0.61865	1
																						2.9771	2.9771	3.31319		0.336096	0.336096	1
																						2.9624	2.9624	3.2657		0.303303	0.303303	1
																						2.94423	2.94423	3.20822		0.26399	0.26399	1
																						2.92183	2.92183	3.13915		0.217323	0.217323	1
																						2.8943	2.8943	3.05688		0.162586	0.162586	1
																						2.86061	2.86061	2.95992		0.0993149	0.0993149	1
																						2.81959	2.81959	2.84704		0.027459	0.027459	1
																						2.76993	2.76993	2.7175		-0.05243	-0.05243	1
																						2.71027	2.71027	2.57126		-0.139012	-0.139012	1
																						2.63921	2.63921	2.40919		-0.230019	-0.230019	1
																						2.55546	2.55546	2.23324		-0.32222	-0.32222	1
																						2.45796	2.45796	2.04642		-0.411542	-0.411542	1
																						2.34608	2.34608	1.85269		-0.493388	-0.493388	1
																						2.21977	2.21977	1.65665		-0.563124	-0.563124	1
																						2.07981	2.07981	1.46312		-0.616686	-0.616686	1
																						2.49042	2.49042	2.79759		0.307167	0.307167	1
																						2.48013	2.48013	2.75749		0.27736	0.27736	1
																						2.46738	2.46738	2.70895		0.241571	0.241571	1
																						2.45163	2.45163	2.65063		0.199003	0.199003	1
																						2.43222	2.43222	2.58117		0.148951	0.148951	1
																						2.40838	2.40838	2.49929		0.0909147	0.0909147	1
																						2.37924	2.37924	2.40398		0.0247459	0.0247459	1
																						2.34378	2.34378	2.2946		-0.0491844	-0.0491844	1
																						2.30092	2.30092	2.17111		-0.129811	-0.129811	1
																						2.2495	2.2495	2.03427		-0.215237	-0.215237	1
																						2.18838	2.18838	1.8857		-0.302677	-0.302677	1
																						2.11648	2.11648	1.72795		-0.388531	-0.388531	1
																						2.033	2.033	1.56437		-0.468628	-0.468628	1
																						1.93747	1.93747	1.39884		-0.53863	-0.53863	1
																						1.82998	1.82998	1.23543		-0.59455	-0.59455	1
																						2.06787	2.06787	2.342		0.274135	0.274135	1
																						2.06077	2.06077	2.30843		0.247667	0.247667	1
																						2.05196	2.05196	2.2678		0.215843	0.215843	1
																						2.04105	2.04105	2.21898		0.177926	0.177926	1
																						2.02758	2.02758	2.16083		0.133247	0.133247	1
																						2.01099	2.01099	2.09229		0.0812995	0.0812995	1
																						1.99063	1.99063	2.0125		0.0218686	0.0218686	1
																						1.96575	1.96575	1.92092		-0.0448238	-0.0448238	1
																						1.93551	1.93551	1.81755		-0.117962	-0.117962	1
																						1.899	1.899	1.70299		-0.196009	-0.196009	1
																						1.85525	1.85525	1.57861		-0.276634	-0.276634	1
																						1.80332	1.80332	1.44656		-0.356761	-0.356761	1
																						1.74236	1.74236	1.30961		-0.432742	-0.432742	1
																						1.67171	1.67171	1.17104		-0.500675	-0.500675	1
																						1.59108	1.59108	1.03424		-0.556835	-0.556835	1
																						1.70604	1.70604	1.94589		0.239858	0.239858	1
																						1.7012	1.7012	1.918		0.216803	0.216803	1
																						1.69519	1.69519	1.88424		0.18905	0.18905	1
																						1.68774	1.68774	1.84368		0.155934	0.155934	1
																						1.67852	1.67852	1.79536		0.11684	0.11684	1
																						1.66713	1.66713	1.73841		0.0712805	0.0712805	1
																						1.65312	1.65312	1.67212		0.0190016	0.0190016	1
																						1.63592	1.63592	1.59603		-0.0398879	-0.0398879	1
																						1.61493	1.61493	1.51014		-0.104784	-0.104784	1
																						1.58943	1.58943	1.41496		-0.174468	-0.174468	1
																						1.55866	1.55866	1.31162		-0.247044	-0.247044	1
																						1.52184	1.52184	1.2019		-0.319947	-0.319947	1
																						1.4782	1.4782	1.08812		-0.390082	-0.390082	1
																						1.42704	1.42704	0.972977		-0.454059	-0.454059	1
																						1.36786	1.36786	0.859317		-0.508541	-0.508541	1
[truncated: 54 more columns]

## Sheet: Competitive
																							Calculated values
		No Inhibitor	[I]1	[I]2	[I]3	[I]4	[I]5	[I]6	[I]7	[I]8	[I]9	[I]10	[I]11	[I]12	[I]13	[I]14	[I]15						No Inhibitor	[I]1	[I]2	[I]3	[I]4	[I]5	[I]6	[I]7	[I]8	[I]9	[I]10	[I]11	[I]12	[I]13	[I]14	[I]15
		0	0.0439805	0.0549756	0.0687195	0.0858993	0.107374	0.134218	0.167772	0.209715	0.262144	0.32768	0.4096	0.512	0.64	0.8	1		Km	Vmax	Ki		0	0.0439805	0.0549756	0.0687195	0.0858993	0.107374	0.134218	0.167772	0.209715	0.262144	0.32768	0.4096	0.512	0.64	0.8	1
[S]1	1	13.6364	10.4289	9.8497	9.2103	8.51903	7.78834	7.03418	6.27469	5.52854	4.8131	4.14294	3.52877	2.9771	2.49042	2.06787	1.70604		0.0126278	9.94788	0.0103756		9.82383	9.33061	9.21495	9.07435	8.90451	8.70095	8.45923	8.17532	7.84616	7.4702	7.04805	6.58304	6.08148	5.55266	5.00829	4.46154		9.82383	9.33061	9.21495	9.07435	8.90451	8.70095	8.45923	8.17532	7.84616	7.4702
[S]2	0.8	13.3333	10.2507	9.69062	9.07106	8.39977	7.68854	6.95267	6.20975	5.47806	4.7748	4.11453	3.50814	2.9624	2.48013	2.06077	1.7012						9.79329	9.18808	9.04829	8.87942	8.67699	8.43658	8.15417	7.82668	7.45254	7.03233	6.56931	6.06977	5.5429	5.00035	4.45524	3.92094		9.79329	9.18808	9.04829	8.87942	8.67699	8.43658	8.15417	7.82668	7.45254	7.03233
[S]3	0.64	12.973	10.0364	9.49885	8.90281	8.2553	7.56733	6.8534	6.13044	5.41625	4.72777	4.07956	3.48269	2.94423	2.46738	2.05196	1.69519						9.7554	9.01593	8.84825	8.64723	8.40844	8.12788	7.80245	7.43057	7.01276	6.55224	6.05519	5.53074	4.99045	4.44738	3.91485	3.40518		9.7554	9.01593	8.84825	8.64723	8.40844	8.12788	7.80245	7.43057	7.01276	6.55224
[S]4	0.512	12.549	9.78076	9.26955	8.70108	8.08156	7.42109	6.73323	6.03411	5.34092	4.67027	4.03668	3.45138	2.92183	2.45163	2.04105	1.68774						9.70843	8.8096	8.61031	8.37353	8.09525	7.77238	7.40329	6.98846	6.53102	6.03706	5.51561	4.97813	4.43759	3.90726	3.39944	2.92434		9.70843	8.8096	8.61031	8.37353	8.09525	7.77238	7.40329	6.98846	6.53102	6.03706
[S]5	0.4096	12.0565	9.47896	8.99804	8.46142	7.87441	7.24604	6.58882	5.91787	5.24965	4.60033	3.98432	3.41304	2.8943	2.43222	2.02758	1.67852						9.65036	8.5646	8.33029	8.05484	7.73512	7.36947	6.95832	6.50469	6.01455	5.49682	4.96282	4.42542	3.89782	3.39229	2.91905	2.48561		9.65036	8.5646	8.33029	8.05484	7.73512	7.36947	6.95832	6.50469	6.01455	5.49682
[S]6	0.32768	11.4927	9.12694	8.68023	8.17979	7.62994	7.03852	6.41678	5.77872	5.13986	4.5158	3.92076	3.36629	2.86061	2.40838	2.01099	1.66713			Sum R2	416.439		9.57874	8.27687	8.00488	7.68904	7.32764	6.92101	6.47207	5.98666	5.47351	4.94381	4.4103	3.88609	3.3834	2.91247	2.48084	2.09309		9.57874	8.27687	8.00488	7.68904	7.32764	6.92101	6.47207	5.98666	5.47351	4.94381
[S]7	0.262144	10.858	8.72204	8.3132	7.85307	7.3449	6.79525	6.21398	5.61372	5.00891	4.41441	3.8441	3.30962	2.81959	2.37924	1.99063	1.65312			Sum residuals %	100.07		9.4907	7.9433	7.6322	7.276	6.87493	6.43176	5.95215	5.44465	4.92025	4.39154	3.87152	3.37235	2.90427	2.47489	2.08885	1.74803		9.4907	7.9433	7.6322	7.276	6.87493	6.43176	5.95215	5.44465	4.92025	4.39154
[S]8	0.209715	10.1568	8.26379	7.89587	7.47962	7.01721	6.51383	5.97781	5.42027	4.85432	4.2939	3.75239	3.24142	2.76993	2.34378	1.96575	1.63592						9.3829	7.56233	7.21247	6.81818	6.38206	5.90956	5.40899	4.89111	4.36831	3.85346	3.35864	2.8941	2.4675	2.08358	1.74434	1.44936		9.3829	7.56233	7.21247	6.81818	6.38206	5.90956	5.40899	4.89111	4.36831	3.85346
[S]9	0.167772	9.39822	7.75451	7.42966	7.05996	6.64655	6.19322	5.7067	5.19642	4.674	4.1522	3.64373	3.16001	2.71027	2.30092	1.93551	1.61493						9.25154	7.1346	6.74855	6.32102	5.85719	5.36508	4.85518	4.33963	3.83112	3.34165	2.88148	2.45832	2.07704	1.73975	1.44619	1.19429		9.25154	7.1346	6.74855	6.32102	5.85719	5.36508	4.85518	4.33963	3.83112	3.34165
[S]10	0.134218	8.5957	7.19988	6.91899	6.59727	6.23487	5.83428	5.40054	4.94134	4.46661	3.98772	3.51644	3.06383	2.63921	2.2495	1.899	1.58943						9.09242	6.66349	6.24633	5.793	5.31118	4.811	4.3043	3.80355	3.32066	2.86586	2.44694	2.06891	1.73404	1.44224	1.1916	0.978935		9.09242	6.66349	6.24633	5.793	5.31118	4.811	4.3043	3.80355	3.32066	2.86586
[S]11	0.107374	7.7667	6.609	6.37156	6.09772	5.78684	5.44015	5.06113	4.65567	4.23189	3.79957	3.36932	2.95154	2.55546	2.18838	1.85525	1.55866						8.90106	6.15542	5.71473	5.24531	4.75689	4.26093	3.76965	3.29479	2.84657	2.43286	2.05884	1.72696	1.43734	1.18825	0.976675	0.798871		8.90106	6.15542	5.71473	5.24531	4.75689	4.26093	3.76965	3.29479	2.84657	2.43286
[S]12	0.0858993	6.93112	5.99409	5.79813	5.57048	5.30989	5.01654	4.69249	4.3419	3.97104	3.58796	3.20187	2.82224	2.45796	2.11648	1.80332	1.52184						8.6729	5.61981	5.16523	4.69093	4.20794	3.72811	3.26302	2.82282	2.41549	2.04638	1.71819	1.43126	1.18409	0.973863	0.796989	0.649529		8.6729	5.61981	5.16523	4.69093	4.20794	3.72811	3.26302	2.82282	2.41549	2.04638
[S]13	0.0687195	6.1095	5.3696	5.21181	5.02714	4.81393	4.57157	4.30091	4.00454	3.68697	3.35444	3.01459	2.67572	2.34608	2.033	1.74236	1.4782						8.40364	5.06851	4.61102	4.14352	3.67746	3.22415	2.79369	2.39413	2.03103	1.70735	1.42373	1.17893	0.970372	0.794649	0.647974	0.526499		8.40364	5.06851	4.61102	4.14352	3.67746	3.22415	2.79369	2.39413	2.03103	1.70735
[S]14	0.0549756	5.32106	4.75089	4.62695	4.48082	4.31065	4.11529	3.89465	3.65004	3.38434	3.10207	2.8092	2.51266	2.21977	1.93747	1.67171	1.42704						8.08969	4.51488	4.06573	3.61605	3.17685	2.7581	2.36795	2.01216	1.69399	1.41443	1.17255	0.966043	0.791744	0.646041	0.525222	0.425705		8.08969	4.51488	4.06573	3.61605	3.17685	2.7581	2.36795	2.01216	1.69399	1.41443
[S]15	0.0439805	4.58192	4.15277	4.05775	3.94493	3.81243	3.65881	3.48337	3.28638	3.06941	2.83542	2.58873	2.33481	2.07981	1.82998	1.59108	1.36786						7.72877	3.97249	3.54212	3.11964	2.71488	2.33602	1.98905	1.67759	1.40298	1.16467	0.960686	0.788142	0.643641	0.523634	0.424661	0.343504		7.72877	3.97249	3.54212	3.11964	2.71488	2.33602	1.98905	1.67759	1.40298	1.16467
	1	1	1	1	1	1	1	1	1	1	1	1	1	1	1	1	1																					1	1	9.82383	9.33061	9.21495	9.07435	8.90451	8.70095	8.45923	8.17532	7.84616	7.4702
	1	1	1	1	1	1	1	1	1	1	1	1	1	1	1	1	1					13.6364	13.6364	9.82383		-3.81254	-3.81254	2										0.8	0.8	9.79329	9.18808	9.04829	8.87942	8.67699	8.43658	8.15417	7.82668	7.45254	7.03233
	1	1	1	1	1	1	1	1	1	1	1	1	1	1	1	1	1					13.3333	13.3333	9.79329		-3.54004	-3.54004	2										0.64	0.64	9.7554	9.01593	8.84825	8.64723	8.40844	8.12788	7.80245	7.43057	7.01276	6.55224
	1	1	1	1	1	1	1	1	1	1	1	1	1	1	1	1	1					12.973	12.973	9.7554		-3.21758	-3.21758	2										0.512	0.512	9.70843	8.8096	8.61031	8.37353	8.09525	7.77238	7.40329	6.98846	6.53102	6.03706
	1	1	1	1	1	1	1	1	1	1	1	1	1	1	1	1	1					12.549	12.549	9.70843		-2.84059	-2.84059	2										0.4096	0.4096	9.65036	8.5646	8.33029	8.05484	7.73512	7.36947	6.95832	6.50469	6.01455	5.49682
	1	1	1	1	1	1	1	1	1	1	1	1	1	1	1	1	1					12.0565	12.0565	9.65036		-2.40615	-2.40615	2										0.32768	0.32768	9.57874	8.27687	8.00488	7.68904	7.32764	6.92101	6.47207	5.98666	5.47351	4.94381
	1	1	1	1	1	1	1	1	1	1	1	1	1	1	1	1	1					11.4927	11.4927	9.57874		-1.91396	-1.91396	2										0.262144	0.262144	9.4907	7.9433	7.6322	7.276	6.87493	6.43176	5.95215	5.44465	4.92025	4.39154
	1	1	1	1	1	1	1	1	1	1	1	1	1	1	1	1	1					10.858	10.858	9.4907		-1.3673	-1.3673	2										0.209715	0.209715	9.3829	7.56233	7.21247	6.81818	6.38206	5.90956	5.40899	4.89111	4.36831	3.85346
	1	1	1	1	1	1	1	1	1	1	1	1	1	1	1	1	1					10.1568	10.1568	9.3829		-0.773945	-0.773945	2										0.167772	0.167772	9.25154	7.1346	6.74855	6.32102	5.85719	5.36508	4.85518	4.33963	3.83112	3.34165
	1	1	1	1	1	1	1	1	1	1	1	1	1	1	1	1	1					9.39822	9.39822	9.25154		-0.146685	-0.146685	2										0.134218	0.134218	9.09242	6.66349	6.24633	5.793	5.31118	4.811	4.3043	3.80355	3.32066	2.86586
	1	1	1	1	1	1	1	1	1	1	1	1	1	1	1	1	1					8.5957	8.5957	9.09242		0.49672	0.49672	2										0.107374	0.107374	8.90106	6.15542	5.71473	5.24531	4.75689	4.26093	3.76965	3.29479	2.84657	2.43286
	1	1	1	1	1	1	1	1	1	1	1	1	1	1	1	1	1					7.7667	7.7667	8.90106		1.13436	1.13436	2										0.0858993	0.0858993	8.6729	5.61981	5.16523	4.69093	4.20794	3.72811	3.26302	2.82282	2.41549	2.04638
	1	1	1	1	1	1	1	1	1	1	1	1	1	1	1	1	1					6.93112	6.93112	8.6729		1.74178	1.74178	2										0.0687195	0.0687195	8.40364	5.06851	4.61102	4.14352	3.67746	3.22415	2.79369	2.39413	2.03103	1.70735
	1	1	1	1	1	1	1	1	1	1	1	1	1	1	1	1	1					6.1095	6.1095	8.40364		2.29413	2.29413	2										0.0549756	0.0549756	8.08969	4.51488	4.06573	3.61605	3.17685	2.7581	2.36795	2.01216	1.69399	1.41443
	1	1	1	1	1	1	1	1	1	1	1	1	1	1	1	1	1					5.32106	5.32106	8.08969		2.76863	2.76863	2										0.0439805	0.0439805	7.72877	3.97249	3.54212	3.11964	2.71488	2.33602	1.98905	1.67759	1.40298	1.16467
																						4.58192	4.58192	7.72877		3.14685	3.14685	2
																						10.4289	10.4289	9.33061		-1.09828	-1.09828	2											1	0.101793	0.107174	0.108519	0.110201	0.112303	0.11493	0.118214	0.122319	0.127451	0.133865
																						10.2507	10.2507	9.18808		-1.06264	-1.06264	2											1.25	0.102111	0.108837	0.110518	0.11262	0.115247	0.118531	0.122637	0.127768	0.134183	0.1422
																						10.0364	10.0364	9.01593		-1.02046	-1.02046	2											1.5625	0.102507	0.110915	0.113017	0.115644	0.118928	0.123033	0.128165	0.134579	0.142597	0.15262
																						9.78076	9.78076	8.8096		-0.971156	-0.971156	2											1.95312	0.103003	0.113513	0.11614	0.119424	0.123529	0.128661	0.135075	0.143093	0.153115	0.165644
																						9.47896	9.47896	8.5646		-0.914361	-0.914361	2											2.44141	0.103623	0.11676	0.120044	0.124149	0.129281	0.135695	0.143713	0.153735	0.166263	0.181923
																						9.12694	9.12694	8.27687		-0.850065	-0.850065	2											3.05176	0.104398	0.120819	0.124924	0.130055	0.13647	0.144488	0.15451	0.167038	0.182698	0.202273
																						8.72204	8.72204	7.9433		-0.778742	-0.778742	2											3.8147	0.105366	0.125892	0.131024	0.137438	0.145456	0.155479	0.168007	0.183667	0.203242	0.227711
																						8.26379	8.26379	7.56233		-0.701456	-0.701456	2											4.76837	0.106577	0.132234	0.138649	0.146667	0.156689	0.169217	0.184877	0.204452	0.228921	0.259507
																						7.75451	7.75451	7.1346		-0.619909	-0.619909	2											5.96046	0.10809	0.140162	0.14818	0.158202	0.17073	0.186391	0.205966	0.230434	0.261021	0.299253
																						7.19988	7.19988	6.66349		-0.536384	-0.536384	2											7.45058	0.109982	0.150071	0.160094	0.172622	0.188282	0.207857	0.232326	0.262912	0.301145	0.348935
																						6.609	6.609	6.15542		-0.453572	-0.453572	2											9.31323	0.112346	0.162458	0.174986	0.190647	0.210222	0.23469	0.265277	0.303509	0.3513	0.411038
																						5.99409	5.99409	5.61981		-0.374282	-0.374282	2											11.6415	0.115302	0.177942	0.193602	0.213177	0.237646	0.268232	0.306465	0.354255	0.413994	0.488667
																						5.3696	5.3696	5.06851		-0.301089	-0.301089	2											14.5519	0.118996	0.197296	0.216872	0.24134	0.271927	0.310159	0.35795	0.417688	0.492361	0.585703
																						4.75089	4.75089	4.51488		-0.23601	-0.23601	2											18.1899	0.123614	0.22149	0.245958	0.276545	0.314777	0.362568	0.422306	0.496979	0.590321	0.706997
																						4.15277	4.15277	3.97249		-0.180275	-0.180275	2											22.7374	0.129387	0.251731	0.282317	0.32055	0.36834	0.428079	0.502752	0.596093	0.71277	0.858616
																						9.8497	9.8497	9.21495		-0.634748	-0.634748	2
																						9.69062	9.69062	9.04829		-0.642327	-0.642327	2												13.6364	10.4289	9.8497	9.2103	8.51903	7.78834	7.03418	6.27469	5.52854	4.8131
																						9.49885	9.49885	8.84825		-0.650594	-0.650594	2												13.3333	10.2507	9.69062	9.07106	8.39977	7.68854	6.95267	6.20975	5.47806	4.7748
																						9.26955	9.26955	8.61031		-0.659241	-0.659241	2												12.973	10.0364	9.49885	8.90281	8.2553	7.56733	6.8534	6.13044	5.41625	4.72777
																						8.99804	8.99804	8.33029		-0.66775	-0.66775	2												12.549	9.78076	9.26955	8.70108	8.08156	7.42109	6.73323	6.03411	5.34092	4.67027
																						8.68023	8.68023	8.00488		-0.67535	-0.67535	2												12.0565	9.47896	8.99804	8.46142	7.87441	7.24604	6.58882	5.91787	5.24965	4.60033
																						8.3132	8.3132	7.6322		-0.681	-0.681	2												11.4927	9.12694	8.68023	8.17979	7.62994	7.03852	6.41678	5.77872	5.13986	4.5158
																						7.89587	7.89587	7.21247		-0.683403	-0.683403	2												10.858	8.72204	8.3132	7.85307	7.3449	6.79525	6.21398	5.61372	5.00891	4.41441
																						7.42966	7.42966	6.74855		-0.681106	-0.681106	2												10.1568	8.26379	7.89587	7.47962	7.01721	6.51383	5.97781	5.42027	4.85432	4.2939
																						6.91899	6.91899	6.24633		-0.672655	-0.672655	2												9.39822	7.75451	7.42966	7.05996	6.64655	6.19322	5.7067	5.19642	4.674	4.1522
																						6.37156	6.37156	5.71473		-0.656831	-0.656831	2												8.5957	7.19988	6.91899	6.59727	6.23487	5.83428	5.40054	4.94134	4.46661	3.98772
																						5.79813	5.79813	5.16523		-0.632893	-0.632893	2												7.7667	6.609	6.37156	6.09772	5.78684	5.44015	5.06113	4.65567	4.23189	3.79957
																						5.21181	5.21181	4.61102		-0.600783	-0.600783	2												6.93112	5.99409	5.79813	5.57048	5.30989	5.01654	4.69249	4.3419	3.97104	3.58796
																						4.62695	4.62695	4.06573		-0.56122	-0.56122	2												6.1095	5.3696	5.21181	5.02714	4.81393	4.57157	4.30091	4.00454	3.68697	3.35444
																						4.05775	4.05775	3.54212		-0.515639	-0.515639	2												5.32106	4.75089	4.62695	4.48082	4.31065	4.11529	3.89465	3.65004	3.38434	3.10207
																						9.2103	9.2103	9.07435		-0.135954	-0.135954	2												4.58192	4.15277	4.05775	3.94493	3.81243	3.65881	3.48337	3.28638	3.06941	2.83542
																						9.07106	9.07106	8.87942		-0.191636	-0.191636	2
																						8.90281	8.90281	8.64723		-0.255582	-0.255582	2												1/s	0	0.0439805	0.0549756	0.0687195	0.0858993	0.107374	0.134218	0.167772	0.209715
																						8.70108	8.70108	8.37353		-0.327555	-0.327555	2											1	1	0.101793	0.107174	0.108519	0.110201	0.112303	0.11493	0.118214	0.122319	0.127451
																						8.46142	8.46142	8.05484		-0.406585	-0.406585	2											2	1.25	0.102111	0.108837	0.110518	0.11262	0.115247	0.118531	0.122637	0.127768	0.134183
																						8.17979	8.17979	7.68904		-0.490757	-0.490757	2											3	1.5625	0.102507	0.110915	0.113017	0.115644	0.118928	0.123033	0.128165	0.134579	0.142597
																						7.85307	7.85307	7.276		-0.577069	-0.577069	2											4	1.95312	0.103003	0.113513	0.11614	0.119424	0.123529	0.128661	0.135075	0.143093	0.153115
																						7.47962	7.47962	6.81818		-0.661443	-0.661443	2											5	2.44141	0.103623	0.11676	0.120044	0.124149	0.129281	0.135695	0.143713	0.153735	0.166263
																						7.05996	7.05996	6.32102		-0.738943	-0.738943	2											6	3.05176	0.104398	0.120819	0.124924	0.130055	0.13647	0.144488	0.15451	0.167038	0.182698
																						6.59727	6.59727	5.793		-0.80426	-0.80426	2											7	3.8147	0.105366	0.125892	0.131024	0.137438	0.145456	0.155479	0.168007	0.183667	0.203242
																						6.09772	6.09772	5.24531		-0.852415	-0.852415	2											8	4.76837	0.106577	0.132234	0.138649	0.146667	0.156689	0.169217	0.184877	0.204452	0.228921
																						5.57048	5.57048	4.69093		-0.879549	-0.879549	2											9	5.96046	0.10809	0.140162	0.14818	0.158202	0.17073	0.186391	0.205966	0.230434	0.261021
																						5.02714	5.02714	4.14352		-0.883617	-0.883617	2											10	7.45058	0.109982	0.150071	0.160094	0.172622	0.188282	0.207857	0.232326	0.262912	0.301145
																						4.48082	4.48082	3.61605		-0.864767	-0.864767	2											11	9.31323	0.112346	0.162458	0.174986	0.190647	0.210222	0.23469	0.265277	0.303509	0.3513
																						3.94493	3.94493	3.11964		-0.82529	-0.82529	2											12	11.6415	0.115302	0.177942	0.193602	0.213177	0.237646	0.268232	0.306465	0.354255	0.413994
																						8.51903	8.51903	8.90451		0.385482	0.385482	2											13	14.5519	0.118996	0.197296	0.216872	0.24134	0.271927	0.310159	0.35795	0.417688	0.492361
																						8.39977	8.39977	8.67699		0.277227	0.277227	2											14	18.1899	0.123614	0.22149	0.245958	0.276545	0.314777	0.362568	0.422306	0.496979	0.590321
																						8.2553	8.2553	8.40844		0.153137	0.153137	2											15	22.7374	0.129387	0.251731	0.282317	0.32055	0.36834	0.428079	0.502752	0.596093	0.71277
																						8.08156	8.08156	8.09525		0.0136891	0.0136891	2
																						7.87441	7.87441	7.73512		-0.139292	-0.139292	2
																						7.62994	7.62994	7.32764		-0.302302	-0.302302	2
																						7.3449	7.3449	6.87493		-0.469972	-0.469972	2
																						7.01721	7.01721	6.38206		-0.635148	-0.635148	2
																						6.64655	6.64655	5.85719		-0.789362	-0.789362	2
																						6.23487	6.23487	5.31118		-0.923694	-0.923694	2
																						5.78684	5.78684	4.75689		-1.02996	-1.02996	2
																						5.30989	5.30989	4.20794		-1.10195	-1.10195	2
																						4.81393	4.81393	3.67746		-1.13647	-1.13647	2
																						4.31065	4.31065	3.17685		-1.1338	-1.1338	2
																						3.81243	3.81243	2.71488		-1.09755	-1.09755	2
																						7.78834	7.78834	8.70095		0.912609	0.912609	2
																						7.68854	7.68854	8.43658		0.748037	0.748037	2
																						7.56733	7.56733	8.12788		0.560548	0.560548	2
																						7.42109	7.42109	7.77238		0.351296	0.351296	2
																						7.24604	7.24604	7.36947		0.123433	0.123433	2
																						7.03852	7.03852	6.92101		-0.117508	-0.117508	2
																						6.79525	6.79525	6.43176		-0.363492	-0.363492	2
																						6.51383	6.51383	5.90956		-0.604266	-0.604266	2
																						6.19322	6.19322	5.36508		-0.828145	-0.828145	2
																						5.83428	5.83428	4.811		-1.02328	-1.02328	2
																						5.44015	5.44015	4.26093		-1.17922	-1.17922	2
																						5.01654	5.01654	3.72811		-1.28843	-1.28843	2
																						4.57157	4.57157	3.22415		-1.34742	-1.34742	2
																						4.11529	4.11529	2.7581		-1.35719	-1.35719	2
																						3.65881	3.65881	2.33602		-1.32279	-1.32279	2
																						7.03418	7.03418	8.45923		1.42504	1.42504	2
																						6.95267	6.95267	8.15417		1.2015	1.2015	2
																						6.8534	6.8534	7.80245		0.94905	0.94905	2
																						6.73323	6.73323	7.40329		0.67006	0.67006	2
																						6.58882	6.58882	6.95832		0.369503	0.369503	2
																						6.41678	6.41678	6.47207		0.0552866	0.0552866	2
																						6.21398	6.21398	5.95215		-0.261828	-0.261828	2
																						5.97781	5.97781	5.40899		-0.568814	-0.568814	2
																						5.7067	5.7067	4.85518		-0.851518	-0.851518	2
																						5.40054	5.40054	4.3043		-1.09624	-1.09624	2
																						5.06113	5.06113	3.76965		-1.29148	-1.29148	2
																						4.69249	4.69249	3.26302		-1.42947	-1.42947	2
																						4.30091	4.30091	2.79369		-1.50722	-1.50722	2
																						3.89465	3.89465	2.36795		-1.5267	-1.5267	2
																						3.48337	3.48337	1.98905		-1.49431	-1.49431	2
																						6.27469	6.27469	8.17532		1.90063	1.90063	2
																						6.20975	6.20975	7.82668		1.61692	1.61692	2
																						6.13044	6.13044	7.43057		1.30013	1.30013	2
																						6.03411	6.03411	6.98846		0.95435	0.95435	2
																						5.91787	5.91787	6.50469		0.586817	0.586817	2
																						5.77872	5.77872	5.98666		0.207938	0.207938	2
																						5.61372	5.61372	5.44465		-0.169075	-0.169075	2
																						5.42027	5.42027	4.89111		-0.529151	-0.529151	2
																						5.19642	5.19642	4.33963		-0.856794	-0.856794	2
																						4.94134	4.94134	3.80355		-1.13779	-1.13779	2
																						4.65567	4.65567	3.29479		-1.36088	-1.36088	2
																						4.3419	4.3419	2.82282		-1.51908	-1.51908	2
																						4.00454	4.00454	2.39413		-1.61041	-1.61041	2
																						3.65004	3.65004	2.01216		-1.63788	-1.63788	2
																						3.28638	3.28638	1.67759		-1.60879	-1.60879	2
																						5.52854	5.52854	7.84616		2.31763	2.31763	2
																						5.47806	5.47806	7.45254		1.97447	1.97447	2
																						5.41625	5.41625	7.01276		1.59651	1.59651	2
																						5.34092	5.34092	6.53102		1.1901	1.1901	2
																						5.24965	5.24965	6.01455		0.764907	0.764907	2
																						5.13986	5.13986	5.47351		0.333651	0.333651	2
																						5.00891	5.00891	4.92025		-0.0886616	-0.0886616	2
																						4.85432	4.85432	4.36831		-0.486006	-0.486006	2
																						4.674	4.674	3.83112		-0.842888	-0.842888	2
																						4.46661	4.46661	3.32066		-1.14595	-1.14595	2
																						4.23189	4.23189	2.84657		-1.38532	-1.38532	2
																						3.97104	3.97104	2.41549		-1.55555	-1.55555	2
																						3.68697	3.68697	2.03103		-1.65594	-1.65594	2
																						3.38434	3.38434	1.69399		-1.69034	-1.69034	2
																						3.06941	3.06941	1.40298		-1.66643	-1.66643	2
																						4.8131	4.8131	7.4702		2.6571	2.6571	2
																						4.7748	4.7748	7.03233		2.25752	2.25752	2
																						4.72777	4.72777	6.55224		1.82447	1.82447	2
																						4.67027	4.67027	6.03706		1.36679	1.36679	2
																						4.60033	4.60033	5.49682		0.896484	0.896484	2
																						4.5158	4.5158	4.94381		0.428003	0.428003	2
																						4.41441	4.41441	4.39154		-0.0228725	-0.0228725	2
																						4.2939	4.2939	3.85346		-0.440442	-0.440442	2
																						4.1522	4.1522	3.34165		-0.810552	-0.810552	2
																						3.98772	3.98772	2.86586		-1.12186	-1.12186	2
																						3.79957	3.79957	2.43286		-1.36671	-1.36671	2
																						3.58796	3.58796	2.04638		-1.54158	-1.54158	2
																						3.35444	3.35444	1.70735		-1.64709	-1.64709	2
																						3.10207	3.10207	1.41443		-1.68764	-1.68764	2
																						2.83542	2.83542	1.16467		-1.67075	-1.67075	2
																						4.14294	4.14294	7.04805		2.90511	2.90511	2
																						4.11453	4.11453	6.56931		2.45478	2.45478	2
																						4.07956	4.07956	6.05519		1.97562	1.97562	2
																						4.03668	4.03668	5.51561		1.47893	1.47893	2
																						3.98432	3.98432	4.96282		0.978494	0.978494	2
																						3.92076	3.92076	4.4103		0.489538	0.489538	2
																						3.8441	3.8441	3.87152		0.0274177	0.0274177	2
																						3.75239	3.75239	3.35864		-0.393754	-0.393754	2
																						3.64373	3.64373	2.88148		-0.762249	-0.762249	2
																						3.51644	3.51644	2.44694		-1.0695	-1.0695	2
																						3.36932	3.36932	2.05884		-1.31048	-1.31048	2
																						3.20187	3.20187	1.71819		-1.48368	-1.48368	2
																						3.01459	3.01459	1.42373		-1.59085	-1.59085	2
																						2.8092	2.8092	1.17255		-1.63665	-1.63665	2
																						2.58873	2.58873	0.960686		-1.62804	-1.62804	2
																						3.52877	3.52877	6.58304		3.05426	3.05426	2
																						3.50814	3.50814	6.06977		2.56163	2.56163	2
																						3.48269	3.48269	5.53074		2.04805	2.04805	2
																						3.45138	3.45138	4.97813		1.52674	1.52674	2
																						3.41304	3.41304	4.42542		1.01238	1.01238	2
																						3.36629	3.36629	3.88609		0.519798	0.519798	2
																						3.30962	3.30962	3.37235		0.0627252	0.0627252	2
																						3.24142	3.24142	2.8941		-0.347318	-0.347318	2
																						3.16001	3.16001	2.45832		-0.701696	-0.701696	2
																						3.06383	3.06383	2.06891		-0.994926	-0.994926	2
																						2.95154	2.95154	1.72696		-1.22458	-1.22458	2
																						2.82224	2.82224	1.43126		-1.39098	-1.39098	2
																						2.67572	2.67572	1.17893		-1.49679	-1.49679	2
																						2.51266	2.51266	0.966043		-1.54662	-1.54662	2
																						2.33481	2.33481	0.788142		-1.54667	-1.54667	2
																						2.9771	2.9771	6.08148		3.10438	3.10438	2
																						2.9624	2.9624	5.5429		2.5805	2.5805	2
																						2.94423	2.94423	4.99045		2.04622	2.04622	2
																						2.92183	2.92183	4.43759		1.51576	1.51576	2
																						2.8943	2.8943	3.89782		1.00352	1.00352	2
																						2.86061	2.86061	3.3834		0.522788	0.522788	2
																						2.81959	2.81959	2.90427		0.084689	0.084689	2
																						2.76993	2.76993	2.4675		-0.302434	-0.302434	2
																						2.71027	2.71027	2.07704		-0.633233	-0.633233	2
																						2.63921	2.63921	1.73404		-0.905171	-0.905171	2
																						2.55546	2.55546	1.43734		-1.11812	-1.11812	2
																						2.45796	2.45796	1.18409		-1.27387	-1.27387	2
																						2.34608	2.34608	0.970372		-1.3757	-1.3757	2
																						2.21977	2.21977	0.791744		-1.42803	-1.42803	2
																						2.07981	2.07981	0.643641		-1.43617	-1.43617	2
																						2.49042	2.49042	5.55266		3.06224	3.06224	2
																						2.48013	2.48013	5.00035		2.52022	2.52022	2
																						2.46738	2.46738	4.44738		1.98	1.98	2
																						2.45163	2.45163	3.90726		1.45564	1.45564	2
																						2.43222	2.43222	3.39229		0.960075	0.960075	2
																						2.40838	2.40838	2.91247		0.504086	0.504086	2
																						2.37924	2.37924	2.47489		0.0956536	0.0956536	2
																						2.34378	2.34378	2.08358		-0.260197	-0.260197	2
																						2.30092	2.30092	1.73975		-0.561177	-0.561177	2
																						2.2495	2.2495	1.44224		-0.807263	-0.807263	2
																						2.18838	2.18838	1.18825		-1.00013	-1.00013	2
																						2.11648	2.11648	0.973863		-1.14262	-1.14262	2
																						2.033	2.033	0.794649		-1.23835	-1.23835	2
																						1.93747	1.93747	0.646041		-1.29143	-1.29143	2
																						1.82998	1.82998	0.523634		-1.30635	-1.30635	2
																						2.06787	2.06787	5.00829		2.94043	2.94043	2
																						2.06077	2.06077	4.45524		2.39447	2.39447	2
																						2.05196	2.05196	3.91485		1.86289	1.86289	2
																						2.04105	2.04105	3.39944		1.35839	1.35839	2
																						2.02758	2.02758	2.91905		0.891475	0.891475	2
																						2.01099	2.01099	2.48084		0.469848	0.469848	2
																						1.99063	1.99063	2.08885		0.0982266	0.0982266	2
																						1.96575	1.96575	1.74434		-0.22141	-0.22141	2
																						1.93551	1.93551	1.44619		-0.489323	-0.489323	2
																						1.899	1.899	1.1916		-0.707402	-0.707402	2
																						1.85525	1.85525	0.976675		-0.878574	-0.878574	2
																						1.80332	1.80332	0.796989		-1.00633	-1.00633	2
																						1.74236	1.74236	0.647974		-1.09438	-1.09438	2
																						1.67171	1.67171	0.525222		-1.14649	-1.14649	2
																						1.59108	1.59108	0.424661		-1.16641	-1.16641	2
																						1.70604	1.70604	4.46154		2.75551	2.75551	2
																						1.7012	1.7012	3.92094		2.21974	2.21974	2
																						1.69519	1.69519	3.40518		1.70999	1.70999	2
																						1.68774	1.68774	2.92434		1.2366	1.2366	2
																						1.67852	1.67852	2.48561		0.807094	0.807094	2
																						1.66713	1.66713	2.09309		0.425955	0.425955	2
																						1.65312	1.65312	1.74803		0.0949137	0.0949137	2
																						1.63592	1.63592	1.44936		-0.186562	-0.186562	2
																						1.61493	1.61493	1.19429		-0.420638	-0.420638	2
																						1.58943	1.58943	0.978935		-0.610491	-0.610491	2
																						1.55866	1.55866	0.798871		-0.759792	-0.759792	2
																						1.52184	1.52184	0.649529		-0.872315	-0.872315	2
																						1.4782	1.4782	0.526499		-0.951698	-0.951698	2
																						1.42704	1.42704	0.425705		-1.00133	-1.00133	2
																						1.36786	1.36786	0.343504		-1.02435	-1.02435	2
[truncated: 54 more columns]

## Sheet: Uncompetitive
																							Calculated values
		No Inhibitor	[I]1	[I]2	[I]3	[I]4	[I]5	[I]6	[I]7	[I]8	[I]9	[I]10	[I]11	[I]12	[I]13	[I]14	[I]15						No Inhibitor	[I]1	[I]2	[I]3	[I]4	[I]5	[I]6	[I]7	[I]8	[I]9	[I]10	[I]11	[I]12	[I]13	[I]14	[I]15
		0	0.0439805	0.0549756	0.0687195	0.0858993	0.107374	0.134218	0.167772	0.209715	0.262144	0.32768	0.4096	0.512	0.64	0.8	1		Km	Vmax	Ki		0	0.0439805	0.0549756	0.0687195	0.0858993	0.107374	0.134218	0.167772	0.209715	0.262144	0.32768	0.4096	0.512	0.64	0.8	1
[S]1	1	13.6364	10.4289	9.8497	9.2103	8.51903	7.78834	7.03418	6.27469	5.52854	4.8131	4.14294	3.52877	2.9771	2.49042	2.06787	1.70604		0.1	15	0.13		13.6364	10.4289	9.8497	9.2103	8.51903	7.78834	7.03418	6.27469	5.52854	4.8131	4.14294	3.52877	2.9771	2.49042	2.06787	1.70604		13.6364	10.4289	9.8497	9.2103	8.51903	7.78834	7.03418	6.27469	5.52854	4.8131
[S]2	0.8	13.3333	10.2507	9.69062	9.07106	8.39977	7.68854	6.95267	6.20975	5.47806	4.7748	4.11453	3.50814	2.9624	2.48013	2.06077	1.7012						13.3333	10.2507	9.69062	9.07106	8.39977	7.68854	6.95267	6.20975	5.47806	4.7748	4.11453	3.50814	2.9624	2.48013	2.06077	1.7012		13.3333	10.2507	9.69062	9.07106	8.39977	7.68854	6.95267	6.20975	5.47806	4.7748
[S]3	0.64	12.973	10.0364	9.49885	8.90281	8.2553	7.56733	6.8534	6.13044	5.41625	4.72777	4.07956	3.48269	2.94423	2.46738	2.05196	1.69519						12.973	10.0364	9.49885	8.90281	8.2553	7.56733	6.8534	6.13044	5.41625	4.72777	4.07956	3.48269	2.94423	2.46738	2.05196	1.69519		12.973	10.0364	9.49885	8.90281	8.2553	7.56733	6.8534	6.13044	5.41625	4.72777
[S]4	0.512	12.549	9.78076	9.26955	8.70108	8.08156	7.42109	6.73323	6.03411	5.34092	4.67027	4.03668	3.45138	2.92183	2.45163	2.04105	1.68774						12.549	9.78076	9.26955	8.70108	8.08156	7.42109	6.73323	6.03411	5.34092	4.67027	4.03668	3.45138	2.92183	2.45163	2.04105	1.68774		12.549	9.78076	9.26955	8.70108	8.08156	7.42109	6.73323	6.03411	5.34092	4.67027
[S]5	0.4096	12.0565	9.47896	8.99804	8.46142	7.87441	7.24604	6.58882	5.91787	5.24965	4.60033	3.98432	3.41304	2.8943	2.43222	2.02758	1.67852						12.0565	9.47896	8.99804	8.46142	7.87441	7.24604	6.58882	5.91787	5.24965	4.60033	3.98432	3.41304	2.8943	2.43222	2.02758	1.67852		12.0565	9.47896	8.99804	8.46142	7.87441	7.24604	6.58882	5.91787	5.24965	4.60033
[S]6	0.32768	11.4927	9.12694	8.68023	8.17979	7.62994	7.03852	6.41678	5.77872	5.13986	4.5158	3.92076	3.36629	2.86061	2.40838	2.01099	1.66713			Sum R2	2.60571e-28		11.4927	9.12694	8.68023	8.17979	7.62994	7.03852	6.41678	5.77872	5.13986	4.5158	3.92076	3.36629	2.86061	2.40838	2.01099	1.66713		11.4927	9.12694	8.68023	8.17979	7.62994	7.03852	6.41678	5.77872	5.13986	4.5158
[S]7	0.262144	10.858	8.72204	8.3132	7.85307	7.3449	6.79525	6.21398	5.61372	5.00891	4.41441	3.8441	3.30962	2.81959	2.37924	1.99063	1.65312			Sum residuals %	3.49424e-14		10.858	8.72204	8.3132	7.85307	7.3449	6.79525	6.21398	5.61372	5.00891	4.41441	3.8441	3.30962	2.81959	2.37924	1.99063	1.65312		10.858	8.72204	8.3132	7.85307	7.3449	6.79525	6.21398	5.61372	5.00891	4.41441
[S]8	0.209715	10.1568	8.26379	7.89587	7.47962	7.01721	6.51383	5.97781	5.42027	4.85432	4.2939	3.75239	3.24142	2.76993	2.34378	1.96575	1.63592						10.1568	8.26379	7.89587	7.47962	7.01721	6.51383	5.97781	5.42027	4.85432	4.2939	3.75239	3.24142	2.76993	2.34378	1.96575	1.63592		10.1568	8.26379	7.89587	7.47962	7.01721	6.51383	5.97781	5.42027	4.85432	4.2939
[S]9	0.167772	9.39822	7.75451	7.42966	7.05996	6.64655	6.19322	5.7067	5.19642	4.674	4.1522	3.64373	3.16001	2.71027	2.30092	1.93551	1.61493						9.39822	7.75451	7.42966	7.05996	6.64655	6.19322	5.7067	5.19642	4.674	4.1522	3.64373	3.16001	2.71027	2.30092	1.93551	1.61493		9.39822	7.75451	7.42966	7.05996	6.64655	6.19322	5.7067	5.19642	4.674	4.1522
[S]10	0.134218	8.5957	7.19988	6.91899	6.59727	6.23487	5.83428	5.40054	4.94134	4.46661	3.98772	3.51644	3.06383	2.63921	2.2495	1.899	1.58943						8.5957	7.19988	6.91899	6.59727	6.23487	5.83428	5.40054	4.94134	4.46661	3.98772	3.51644	3.06383	2.63921	2.2495	1.899	1.58943		8.5957	7.19988	6.91899	6.59727	6.23487	5.83428	5.40054	4.94134	4.46661	3.98772
[S]11	0.107374	7.7667	6.609	6.37156	6.09772	5.78684	5.44015	5.06113	4.65567	4.23189	3.79957	3.36932	2.95154	2.55546	2.18838	1.85525	1.55866						7.7667	6.609	6.37156	6.09772	5.78684	5.44015	5.06113	4.65567	4.23189	3.79957	3.36932	2.95154	2.55546	2.18838	1.85525	1.55866		7.7667	6.609	6.37156	6.09772	5.78684	5.44015	5.06113	4.65567	4.23189	3.79957
[S]12	0.0858993	6.93112	5.99409	5.79813	5.57048	5.30989	5.01654	4.69249	4.3419	3.97104	3.58796	3.20187	2.82224	2.45796	2.11648	1.80332	1.52184						6.93112	5.99409	5.79813	5.57048	5.30989	5.01654	4.69249	4.3419	3.97104	3.58796	3.20187	2.82224	2.45796	2.11648	1.80332	1.52184		6.93112	5.99409	5.79813	5.57048	5.30989	5.01654	4.69249	4.3419	3.97104	3.58796
[S]13	0.0687195	6.1095	5.3696	5.21181	5.02714	4.81393	4.57157	4.30091	4.00454	3.68697	3.35444	3.01459	2.67572	2.34608	2.033	1.74236	1.4782						6.1095	5.3696	5.21181	5.02714	4.81393	4.57157	4.30091	4.00454	3.68697	3.35444	3.01459	2.67572	2.34608	2.033	1.74236	1.4782		6.1095	5.3696	5.21181	5.02714	4.81393	4.57157	4.30091	4.00454	3.68697	3.35444
[S]14	0.0549756	5.32106	4.75089	4.62695	4.48082	4.31065	4.11529	3.89465	3.65004	3.38434	3.10207	2.8092	2.51266	2.21977	1.93747	1.67171	1.42704						5.32106	4.75089	4.62695	4.48082	4.31065	4.11529	3.89465	3.65004	3.38434	3.10207	2.8092	2.51266	2.21977	1.93747	1.67171	1.42704		5.32106	4.75089	4.62695	4.48082	4.31065	4.11529	3.89465	3.65004	3.38434	3.10207
[S]15	0.0439805	4.58192	4.15277	4.05775	3.94493	3.81243	3.65881	3.48337	3.28638	3.06941	2.83542	2.58873	2.33481	2.07981	1.82998	1.59108	1.36786						4.58192	4.15277	4.05775	3.94493	3.81243	3.65881	3.48337	3.28638	3.06941	2.83542	2.58873	2.33481	2.07981	1.82998	1.59108	1.36786		4.58192	4.15277	4.05775	3.94493	3.81243	3.65881	3.48337	3.28638	3.06941	2.83542
	1	1	1	1	1	1	1	1	1	1	1	1	1	1	1	1	1																					1	1	13.6364	10.4289	9.8497	9.2103	8.51903	7.78834	7.03418	6.27469	5.52854	4.8131
	1	1	1	1	1	1	1	1	1	1	1	1	1	1	1	1	1					13.6364	13.6364	13.6364		0	0	3										0.8	0.8	13.3333	10.2507	9.69062	9.07106	8.39977	7.68854	6.95267	6.20975	5.47806	4.7748
	1	1	1	1	1	1	1	1	1	1	1	1	1	1	1	1	1					13.3333	13.3333	13.3333		0	0	3										0.64	0.64	12.973	10.0364	9.49885	8.90281	8.2553	7.56733	6.8534	6.13044	5.41625	4.72777
	1	1	1	1	1	1	1	1	1	1	1	1	1	1	1	1	1					12.973	12.973	12.973		0	0	3										0.512	0.512	12.549	9.78076	9.26955	8.70108	8.08156	7.42109	6.73323	6.03411	5.34092	4.67027
	1	1	1	1	1	1	1	1	1	1	1	1	1	1	1	1	1					12.549	12.549	12.549		0	0	3										0.4096	0.4096	12.0565	9.47896	8.99804	8.46142	7.87441	7.24604	6.58882	5.91787	5.24965	4.60033
	1	1	1	1	1	1	1	1	1	1	1	1	1	1	1	1	1					12.0565	12.0565	12.0565		0	0	3										0.32768	0.32768	11.4927	9.12694	8.68023	8.17979	7.62994	7.03852	6.41678	5.77872	5.13986	4.5158
	1	1	1	1	1	1	1	1	1	1	1	1	1	1	1	1	1					11.4927	11.4927	11.4927		0	0	3										0.262144	0.262144	10.858	8.72204	8.3132	7.85307	7.3449	6.79525	6.21398	5.61372	5.00891	4.41441
	1	1	1	1	1	1	1	1	1	1	1	1	1	1	1	1	1					10.858	10.858	10.858		0	0	3										0.209715	0.209715	10.1568	8.26379	7.89587	7.47962	7.01721	6.51383	5.97781	5.42027	4.85432	4.2939
	1	1	1	1	1	1	1	1	1	1	1	1	1	1	1	1	1					10.1568	10.1568	10.1568		0	0	3										0.167772	0.167772	9.39822	7.75451	7.42966	7.05996	6.64655	6.19322	5.7067	5.19642	4.674	4.1522
	1	1	1	1	1	1	1	1	1	1	1	1	1	1	1	1	1					9.39822	9.39822	9.39822		0	0	3										0.134218	0.134218	8.5957	7.19988	6.91899	6.59727	6.23487	5.83428	5.40054	4.94134	4.46661	3.98772
	1	1	1	1	1	1	1	1	1	1	1	1	1	1	1	1	1					8.5957	8.5957	8.5957		0	0	3										0.107374	0.107374	7.7667	6.609	6.37156	6.09772	5.78684	5.44015	5.06113	4.65567	4.23189	3.79957
	1	1	1	1	1	1	1	1	1	1	1	1	1	1	1	1	1					7.7667	7.7667	7.7667		0	0	3										0.0858993	0.0858993	6.93112	5.99409	5.79813	5.57048	5.30989	5.01654	4.69249	4.3419	3.97104	3.58796
	1	1	1	1	1	1	1	1	1	1	1	1	1	1	1	1	1					6.93112	6.93112	6.93112		0	0	3										0.0687195	0.0687195	6.1095	5.3696	5.21181	5.02714	4.81393	4.57157	4.30091	4.00454	3.68697	3.35444
	1	1	1	1	1	1	1	1	1	1	1	1	1	1	1	1	1					6.1095	6.1095	6.1095		0	0	3										0.0549756	0.0549756	5.32106	4.75089	4.62695	4.48082	4.31065	4.11529	3.89465	3.65004	3.38434	3.10207
	1	1	1	1	1	1	1	1	1	1	1	1	1	1	1	1	1					5.32106	5.32106	5.32106		0	0	3										0.0439805	0.0439805	4.58192	4.15277	4.05775	3.94493	3.81243	3.65881	3.48337	3.28638	3.06941	2.83542
																						4.58192	4.58192	4.58192		0	0	3
																						10.4289	10.4289	10.4289		0	0	3											1	0.0733333	0.0958874	0.101526	0.108574	0.117384	0.128397	0.142163	0.15937	0.18088	0.207766
																						10.2507	10.2507	10.2507		0	0	3											1.25	0.075	0.0975541	0.103193	0.110241	0.119051	0.130064	0.14383	0.161037	0.182546	0.209433
																						10.0364	10.0364	10.0364		0	0	3											1.5625	0.0770833	0.0996374	0.105276	0.112324	0.121134	0.132147	0.145913	0.16312	0.18463	0.211516
																						9.78076	9.78076	9.78076		0	0	3											1.95312	0.0796875	0.102242	0.10788	0.114928	0.123738	0.134751	0.148517	0.165725	0.187234	0.21412
																						9.47896	9.47896	9.47896		0	0	3											2.44141	0.0829427	0.105497	0.111135	0.118183	0.126994	0.138006	0.151772	0.16898	0.190489	0.217376
																						9.12694	9.12694	9.12694		0	0	3											3.05176	0.0870117	0.109566	0.115204	0.122252	0.131063	0.142075	0.155841	0.173049	0.194558	0.221445
																						8.72204	8.72204	8.72204		0	0	3											3.8147	0.092098	0.114652	0.120291	0.127339	0.136149	0.147162	0.160928	0.178135	0.199644	0.226531
																						8.26379	8.26379	8.26379		0	0	3											4.76837	0.0984558	0.12101	0.126648	0.133697	0.142507	0.153519	0.167285	0.184493	0.206002	0.232889
																						7.75451	7.75451	7.75451		0	0	3											5.96046	0.106403	0.128957	0.134596	0.141644	0.150454	0.161467	0.175233	0.19244	0.213949	0.240836
																						7.19988	7.19988	7.19988		0	0	3											7.45058	0.116337	0.138891	0.14453	0.151578	0.160388	0.171401	0.185167	0.202374	0.223883	0.25077
																						6.609	6.609	6.609		0	0	3											9.31323	0.128755	0.151309	0.156947	0.163996	0.172806	0.183819	0.197584	0.214792	0.236301	0.263188
																						5.99409	5.99409	5.99409		0	0	3											11.6415	0.144277	0.166831	0.172469	0.179518	0.188328	0.199341	0.213106	0.230314	0.251823	0.27871
																						5.3696	5.3696	5.3696		0	0	3											14.5519	0.163679	0.186234	0.191872	0.19892	0.20773	0.218743	0.232509	0.249716	0.271226	0.298112
																						4.75089	4.75089	4.75089		0	0	3											18.1899	0.187933	0.210487	0.216125	0.223173	0.231984	0.242996	0.256762	0.27397	0.295479	0.322365
																						4.15277	4.15277	4.15277		0	0	3											22.7374	0.218249	0.240803	0.246442	0.25349	0.2623	0.273313	0.287079	0.304286	0.325795	0.352682
																						9.8497	9.8497	9.8497		0	0	3
																						9.69062	9.69062	9.69062		0	0	3												13.6364	10.4289	9.8497	9.2103	8.51903	7.78834	7.03418	6.27469	5.52854	4.8131
																						9.49885	9.49885	9.49885		0	0	3												13.3333	10.2507	9.69062	9.07106	8.39977	7.68854	6.95267	6.20975	5.47806	4.7748
																						9.26955	9.26955	9.26955		0	0	3												12.973	10.0364	9.49885	8.90281	8.2553	7.56733	6.8534	6.13044	5.41625	4.72777
																						8.99804	8.99804	8.99804		0	0	3												12.549	9.78076	9.26955	8.70108	8.08156	7.42109	6.73323	6.03411	5.34092	4.67027
																						8.68023	8.68023	8.68023		0	0	3												12.0565	9.47896	8.99804	8.46142	7.87441	7.24604	6.58882	5.91787	5.24965	4.60033
																						8.3132	8.3132	8.3132		0	0	3												11.4927	9.12694	8.68023	8.17979	7.62994	7.03852	6.41678	5.77872	5.13986	4.5158
																						7.89587	7.89587	7.89587		0	0	3												10.858	8.72204	8.3132	7.85307	7.3449	6.79525	6.21398	5.61372	5.00891	4.41441
																						7.42966	7.42966	7.42966		0	0	3												10.1568	8.26379	7.89587	7.47962	7.01721	6.51383	5.97781	5.42027	4.85432	4.2939
																						6.91899	6.91899	6.91899		0	0	3												9.39822	7.75451	7.42966	7.05996	6.64655	6.19322	5.7067	5.19642	4.674	4.1522
																						6.37156	6.37156	6.37156		0	0	3												8.5957	7.19988	6.91899	6.59727	6.23487	5.83428	5.40054	4.94134	4.46661	3.98772
																						5.79813	5.79813	5.79813		0	0	3												7.7667	6.609	6.37156	6.09772	5.78684	5.44015	5.06113	4.65567	4.23189	3.79957
																						5.21181	5.21181	5.21181		0	0	3												6.93112	5.99409	5.79813	5.57048	5.30989	5.01654	4.69249	4.3419	3.97104	3.58796
																						4.62695	4.62695	4.62695		0	0	3												6.1095	5.3696	5.21181	5.02714	4.81393	4.57157	4.30091	4.00454	3.68697	3.35444
																						4.05775	4.05775	4.05775		0	0	3												5.32106	4.75089	4.62695	4.48082	4.31065	4.11529	3.89465	3.65004	3.38434	3.10207
																						9.2103	9.2103	9.2103		0	0	3												4.58192	4.15277	4.05775	3.94493	3.81243	3.65881	3.48337	3.28638	3.06941	2.83542
																						9.07106	9.07106	9.07106		0	0	3
																						8.90281	8.90281	8.90281		0	0	3												1/s	0	0.0439805	0.0549756	0.0687195	0.0858993	0.107374	0.134218	0.167772	0.209715
																						8.70108	8.70108	8.70108		0	0	3											1	1	0.0733333	0.0958874	0.101526	0.108574	0.117384	0.128397	0.142163	0.15937	0.18088
																						8.46142	8.46142	8.46142		0	0	3											2	1.25	0.075	0.0975541	0.103193	0.110241	0.119051	0.130064	0.14383	0.161037	0.182546
																						8.17979	8.17979	8.17979		0	0	3											3	1.5625	0.0770833	0.0996374	0.105276	0.112324	0.121134	0.132147	0.145913	0.16312	0.18463
																						7.85307	7.85307	7.85307		0	0	3											4	1.95312	0.0796875	0.102242	0.10788	0.114928	0.123738	0.134751	0.148517	0.165725	0.187234
																						7.47962	7.47962	7.47962		0	0	3											5	2.44141	0.0829427	0.105497	0.111135	0.118183	0.126994	0.138006	0.151772	0.16898	0.190489
																						7.05996	7.05996	7.05996		0	0	3											6	3.05176	0.0870117	0.109566	0.115204	0.122252	0.131063	0.142075	0.155841	0.173049	0.194558
																						6.59727	6.59727	6.59727		0	0	3											7	3.8147	0.092098	0.114652	0.120291	0.127339	0.136149	0.147162	0.160928	0.178135	0.199644
																						6.09772	6.09772	6.09772		0	0	3											8	4.76837	0.0984558	0.12101	0.126648	0.133697	0.142507	0.153519	0.167285	0.184493	0.206002
																						5.57048	5.57048	5.57048		0	0	3											9	5.96046	0.106403	0.128957	0.134596	0.141644	0.150454	0.161467	0.175233	0.19244	0.213949
																						5.02714	5.02714	5.02714		0	0	3											10	7.45058	0.116337	0.138891	0.14453	0.151578	0.160388	0.171401	0.185167	0.202374	0.223883
																						4.48082	4.48082	4.48082		0	0	3											11	9.31323	0.128755	0.151309	0.156947	0.163996	0.172806	0.183819	0.197584	0.214792	0.236301
																						3.94493	3.94493	3.94493		0	0	3											12	11.6415	0.144277	0.166831	0.172469	0.179518	0.188328	0.199341	0.213106	0.230314	0.251823
																						8.51903	8.51903	8.51903		0	0	3											13	14.5519	0.163679	0.186234	0.191872	0.19892	0.20773	0.218743	0.232509	0.249716	0.271226
																						8.39977	8.39977	8.39977		0	0	3											14	18.1899	0.187933	0.210487	0.216125	0.223173	0.231984	0.242996	0.256762	0.27397	0.295479
																						8.2553	8.2553	8.2553		0	0	3											15	22.7374	0.218249	0.240803	0.246442	0.25349	0.2623	0.273313	0.287079	0.304286	0.325795
																						8.08156	8.08156	8.08156		0	0	3
																						7.87441	7.87441	7.87441		0	0	3
																						7.62994	7.62994	7.62994		0	0	3
																						7.3449	7.3449	7.3449		0	0	3
																						7.01721	7.01721	7.01721		0	0	3
																						6.64655	6.64655	6.64655		0	0	3
																						6.23487	6.23487	6.23487		0	0	3
																						5.78684	5.78684	5.78684		0	0	3
																						5.30989	5.30989	5.30989		0	0	3
																						4.81393	4.81393	4.81393		0	0	3
																						4.31065	4.31065	4.31065		0	0	3
																						3.81243	3.81243	3.81243		0	0	3
																						7.78834	7.78834	7.78834		0	0	3
																						7.68854	7.68854	7.68854		0	0	3
																						7.56733	7.56733	7.56733		0	0	3
																						7.42109	7.42109	7.42109		0	0	3
																						7.24604	7.24604	7.24604		0	0	3
																						7.03852	7.03852	7.03852		0	0	3
																						6.79525	6.79525	6.79525		0	0	3
																						6.51383	6.51383	6.51383		0	0	3
																						6.19322	6.19322	6.19322		0	0	3
																						5.83428	5.83428	5.83428		0	0	3
																						5.44015	5.44015	5.44015		0	0	3
																						5.01654	5.01654	5.01654		0	0	3
																						4.57157	4.57157	4.57157		0	0	3
																						4.11529	4.11529	4.11529		0	0	3
																						3.65881	3.65881	3.65881		0	0	3
																						7.03418	7.03418	7.03418		0	0	3
																						6.95267	6.95267	6.95267		0	0	3
																						6.8534	6.8534	6.8534		0	0	3
																						6.73323	6.73323	6.73323		0	0	3
																						6.58882	6.58882	6.58882		0	0	3
																						6.41678	6.41678	6.41678		0	0	3
																						6.21398	6.21398	6.21398		0	0	3
																						5.97781	5.97781	5.97781		0	0	3
																						5.7067	5.7067	5.7067		0	0	3
																						5.40054	5.40054	5.40054		0	0	3
																						5.06113	5.06113	5.06113		0	0	3
																						4.69249	4.69249	4.69249		0	0	3
																						4.30091	4.30091	4.30091		0	0	3
																						3.89465	3.89465	3.89465		0	0	3
																						3.48337	3.48337	3.48337		0	0	3
																						6.27469	6.27469	6.27469		0	0	3
																						6.20975	6.20975	6.20975		0	0	3
																						6.13044	6.13044	6.13044		0	0	3
																						6.03411	6.03411	6.03411		0	0	3
																						5.91787	5.91787	5.91787		0	0	3
																						5.77872	5.77872	5.77872		0	0	3
																						5.61372	5.61372	5.61372		0	0	3
																						5.42027	5.42027	5.42027		0	0	3
																						5.19642	5.19642	5.19642		0	0	3
																						4.94134	4.94134	4.94134		0	0	3
																						4.65567	4.65567	4.65567		0	0	3
																						4.3419	4.3419	4.3419		0	0	3
																						4.00454	4.00454	4.00454		0	0	3
																						3.65004	3.65004	3.65004		0	0	3
																						3.28638	3.28638	3.28638		0	0	3
																						5.52854	5.52854	5.52854		0	0	3
																						5.47806	5.47806	5.47806		0	0	3
																						5.41625	5.41625	5.41625		0	0	3
																						5.34092	5.34092	5.34092		0	0	3
																						5.24965	5.24965	5.24965		0	0	3
																						5.13986	5.13986	5.13986		0	0	3
																						5.00891	5.00891	5.00891		0	0	3
																						4.85432	4.85432	4.85432		0	0	3
																						4.674	4.674	4.674		0	0	3
																						4.46661	4.46661	4.46661		0	0	3
																						4.23189	4.23189	4.23189		0	0	3
																						3.97104	3.97104	3.97104		0	0	3
																						3.68697	3.68697	3.68697		0	0	3
																						3.38434	3.38434	3.38434		0	0	3
																						3.06941	3.06941	3.06941		0	0	3
																						4.8131	4.8131	4.8131		0	0	3
																						4.7748	4.7748	4.7748		0	0	3
																						4.72777	4.72777	4.72777		0	0	3
																						4.67027	4.67027	4.67027		0	0	3
																						4.60033	4.60033	4.60033		0	0	3
																						4.5158	4.5158	4.5158		0	0	3
																						4.41441	4.41441	4.41441		0	0	3
																						4.2939	4.2939	4.2939		0	0	3
																						4.1522	4.1522	4.1522		0	0	3
																						3.98772	3.98772	3.98772		0	0	3
																						3.79957	3.79957	3.79957		0	0	3
																						3.58796	3.58796	3.58796		0	0	3
																						3.35444	3.35444	3.35444		0	0	3
																						3.10207	3.10207	3.10207		0	0	3
																						2.83542	2.83542	2.83542		0	0	3
																						4.14294	4.14294	4.14294		0	0	3
																						4.11453	4.11453	4.11453		0	0	3
																						4.07956	4.07956	4.07956		0	0	3
																						4.03668	4.03668	4.03668		0	0	3
																						3.98432	3.98432	3.98432		0	0	3
																						3.92076	3.92076	3.92076		0	0	3
																						3.8441	3.8441	3.8441		0	0	3
																						3.75239	3.75239	3.75239		0	0	3
																						3.64373	3.64373	3.64373		0	0	3
																						3.51644	3.51644	3.51644		0	0	3
																						3.36932	3.36932	3.36932		0	0	3
																						3.20187	3.20187	3.20187		0	0	3
																						3.01459	3.01459	3.01459		0	0	3
																						2.8092	2.8092	2.8092		0	0	3
																						2.58873	2.58873	2.58873		0	0	3
																						3.52877	3.52877	3.52877		0	0	3
																						3.50814	3.50814	3.50814		0	0	3
																						3.48269	3.48269	3.48269		0	0	3
																						3.45138	3.45138	3.45138		0	0	3
																						3.41304	3.41304	3.41304		0	0	3
																						3.36629	3.36629	3.36629		0	0	3
																						3.30962	3.30962	3.30962		0	0	3
																						3.24142	3.24142	3.24142		0	0	3
																						3.16001	3.16001	3.16001		0	0	3
																						3.06383	3.06383	3.06383		0	0	3
																						2.95154	2.95154	2.95154		0	0	3
																						2.82224	2.82224	2.82224		0	0	3
																						2.67572	2.67572	2.67572		0	0	3
																						2.51266	2.51266	2.51266		0	0	3
																						2.33481	2.33481	2.33481		0	0	3
																						2.9771	2.9771	2.9771		0	0	3
																						2.9624	2.9624	2.9624		0	0	3
																						2.94423	2.94423	2.94423		0	0	3
																						2.92183	2.92183	2.92183		0	0	3
																						2.8943	2.8943	2.8943		0	0	3
																						2.86061	2.86061	2.86061		0	0	3
																						2.81959	2.81959	2.81959		0	0	3
																						2.76993	2.76993	2.76993		0	0	3
																						2.71027	2.71027	2.71027		0	0	3
																						2.63921	2.63921	2.63921		0	0	3
																						2.55546	2.55546	2.55546		0	0	3
																						2.45796	2.45796	2.45796		0	0	3
																						2.34608	2.34608	2.34608		0	0	3
																						2.21977	2.21977	2.21977		0	0	3
																						2.07981	2.07981	2.07981		0	0	3
																						2.49042	2.49042	2.49042		0	0	3
																						2.48013	2.48013	2.48013		0	0	3
																						2.46738	2.46738	2.46738		0	0	3
																						2.45163	2.45163	2.45163		0	0	3
																						2.43222	2.43222	2.43222		0	0	3
																						2.40838	2.40838	2.40838		0	0	3
																						2.37924	2.37924	2.37924		0	0	3
																						2.34378	2.34378	2.34378		0	0	3
																						2.30092	2.30092	2.30092		0	0	3
																						2.2495	2.2495	2.2495		0	0	3
																						2.18838	2.18838	2.18838		0	0	3
																						2.11648	2.11648	2.11648		0	0	3
																						2.033	2.033	2.033		0	0	3
																						1.93747	1.93747	1.93747		0	0	3
																						1.82998	1.82998	1.82998		0	0	3
																						2.06787	2.06787	2.06787		0	0	3
																						2.06077	2.06077	2.06077		0	0	3
																						2.05196	2.05196	2.05196		0	0	3
																						2.04105	2.04105	2.04105		0	0	3
																						2.02758	2.02758	2.02758		0	0	3
																						2.01099	2.01099	2.01099		0	0	3
																						1.99063	1.99063	1.99063		0	0	3
																						1.96575	1.96575	1.96575		0	0	3
																						1.93551	1.93551	1.93551		0	0	3
																						1.899	1.899	1.899		0	0	3
																						1.85525	1.85525	1.85525		0	0	3
																						1.80332	1.80332	1.80332		0	0	3
																						1.74236	1.74236	1.74236		0	0	3
																						1.67171	1.67171	1.67171		0	0	3
																						1.59108	1.59108	1.59108		0	0	3
																						1.70604	1.70604	1.70604		0	0	3
																						1.7012	1.7012	1.7012		0	0	3
																						1.69519	1.69519	1.69519		0	0	3
																						1.68774	1.68774	1.68774		0	0	3
																						1.67852	1.67852	1.67852		0	0	3
																						1.66713	1.66713	1.66713		0	0	3
																						1.65312	1.65312	1.65312		0	0	3
																						1.63592	1.63592	1.63592		0	0	3
																						1.61493	1.61493	1.61493		0	0	3
																						1.58943	1.58943	1.58943		0	0	3
																						1.55866	1.55866	1.55866		0	0	3
																						1.52184	1.52184	1.52184		0	0	3
																						1.4782	1.4782	1.4782		0	0	3
																						1.42704	1.42704	1.42704		0	0	3
																						1.36786	1.36786	1.36786		0	0	3
[truncated: 54 more columns]

## Sheet: Mixed Non-competitive
																							Calculated values
		No Inhibitor	[I]1	[I]2	[I]3	[I]4	[I]5	[I]6	[I]7	[I]8	[I]9	[I]10	[I]11	[I]12	[I]13	[I]14	[I]15						No Inhibitor	[I]1	[I]2	[I]3	[I]4	[I]5	[I]6	[I]7	[I]8	[I]9	[I]10	[I]11	[I]12	[I]13	[I]14	[I]15
		0	0.0439805	0.0549756	0.0687195	0.0858993	0.107374	0.134218	0.167772	0.209715	0.262144	0.32768	0.4096	0.512	0.64	0.8	1	Km	Vmax	Ki	aKi		0	0.0439805	0.0549756	0.0687195	0.0858993	0.107374	0.134218	0.167772	0.209715	0.262144	0.32768	0.4096	0.512	0.64	0.8	1
[S]1	1	13.6364	10.4289	9.8497	9.2103	8.51903	7.78834	7.03418	6.27469	5.52854	4.8131	4.14294	3.52877	2.9771	2.49042	2.06787	1.70604	0.0999939	14.9998	1708.89	0.130006		13.6362	10.4289	9.84969	9.21031	8.51905	7.78837	7.03422	6.27474	5.52859	4.81316	4.143	3.52882	2.97715	2.49046	2.06791	1.70607		13.6362	10.4289	9.84969	9.21031	8.51905	7.78837	7.03422	6.27474	5.52859	4.81316
[S]2	0.8	13.3333	10.2507	9.69062	9.07106	8.39977	7.68854	6.95267	6.20975	5.47806	4.7748	4.11453	3.50814	2.9624	2.48013	2.06077	1.7012						13.3332	10.2507	9.69061	9.07106	8.39978	7.68857	6.95271	6.2098	5.47811	4.77485	4.11458	3.50819	2.96244	2.48017	2.0608	1.70123		13.3332	10.2507	9.69061	9.07106	8.39978	7.68857	6.95271	6.2098	5.47811	4.77485
[S]3	0.64	12.973	10.0364	9.49885	8.90281	8.2553	7.56733	6.8534	6.13044	5.41625	4.72777	4.07956	3.48269	2.94423	2.46738	2.05196	1.69519						12.9729	10.0364	9.49884	8.90282	8.25532	7.56736	6.85344	6.13048	5.41629	4.72781	4.0796	3.48273	2.94427	2.46741	2.05199	1.69522		12.9729	10.0364	9.49884	8.90282	8.25532	7.56736	6.85344	6.13048	5.41629	4.72781
[S]4	0.512	12.549	9.78076	9.26955	8.70108	8.08156	7.42109	6.73323	6.03411	5.34092	4.67027	4.03668	3.45138	2.92183	2.45163	2.04105	1.68774						12.5489	9.78075	9.26955	8.70109	8.08158	7.42111	6.73326	6.03414	5.34095	4.67031	4.03671	3.45142	2.92186	2.45165	2.04107	1.68776		12.5489	9.78075	9.26955	8.70109	8.08158	7.42111	6.73326	6.03414	5.34095	4.67031
[S]5	0.4096	12.0565	9.47896	8.99804	8.46142	7.87441	7.24604	6.58882	5.91787	5.24965	4.60033	3.98432	3.41304	2.8943	2.43222	2.02758	1.67852						12.0565	9.47896	8.99804	8.46143	7.87442	7.24606	6.58884	5.9179	5.24967	4.60036	3.98435	3.41306	2.89432	2.43224	2.0276	1.67854		12.0565	9.47896	8.99804	8.46143	7.87442	7.24606	6.58884	5.9179	5.24967	4.60036
[S]6	0.32768	11.4927	9.12694	8.68023	8.17979	7.62994	7.03852	6.41678	5.77872	5.13986	4.5158	3.92076	3.36629	2.86061	2.40838	2.01099	1.66713			Sum R2	6.13733e-07		11.4927	9.12694	8.68024	8.1798	7.62995	7.03853	6.4168	5.77874	5.13987	4.51582	3.92077	3.36631	2.86062	2.40839	2.011	1.66714		11.4927	9.12694	8.68024	8.1798	7.62995	7.03853	6.4168	5.77874	5.13987	4.51582
[S]7	0.262144	10.858	8.72204	8.3132	7.85307	7.3449	6.79525	6.21398	5.61372	5.00891	4.41441	3.8441	3.30962	2.81959	2.37924	1.99063	1.65312			Sum residuals %	0.00283522		10.858	8.72205	8.31321	7.85308	7.34491	6.79526	6.21398	5.61373	5.00892	4.41442	3.8441	3.30963	2.81959	2.37924	1.99063	1.65312		10.858	8.72205	8.31321	7.85308	7.34491	6.79526	6.21398	5.61373	5.00892	4.41442
[S]8	0.209715	10.1568	8.26379	7.89587	7.47962	7.01721	6.51383	5.97781	5.42027	4.85432	4.2939	3.75239	3.24142	2.76993	2.34378	1.96575	1.63592						10.1569	8.26381	7.89589	7.47963	7.01722	6.51383	5.97781	5.42026	4.85431	4.29389	3.75238	3.24141	2.76992	2.34377	1.96574	1.63591		10.1569	8.26381	7.89589	7.47963	7.01722	6.51383	5.97781	5.42026	4.85431	4.29389
[S]9	0.167772	9.39822	7.75451	7.42966	7.05996	6.64655	6.19322	5.7067	5.19642	4.674	4.1522	3.64373	3.16001	2.71027	2.30092	1.93551	1.61493						9.39829	7.75454	7.42968	7.05997	6.64655	6.19322	5.70669	5.19641	4.67399	4.15218	3.64371	3.15999	2.71024	2.3009	1.93549	1.61491		9.39829	7.75454	7.42968	7.05997	6.64655	6.19322	5.70669	5.19641	4.67399	4.15218
[S]10	0.134218	8.5957	7.19988	6.91899	6.59727	6.23487	5.83428	5.40054	4.94134	4.46661	3.98772	3.51644	3.06383	2.63921	2.2495	1.899	1.58943						8.59579	7.19991	6.91901	6.59728	6.23488	5.83427	5.40052	4.94132	4.46658	3.98768	3.5164	3.06379	2.63917	2.24947	1.89896	1.5894		8.59579	7.19991	6.91901	6.59728	6.23488	5.83427	5.40052	4.94132	4.46658	3.98768
[S]11	0.107374	7.7667	6.609	6.37156	6.09772	5.78684	5.44015	5.06113	4.65567	4.23189	3.79957	3.36932	2.95154	2.55546	2.18838	1.85525	1.55866						7.76681	6.60903	6.37159	6.09774	5.78684	5.44013	5.0611	4.65563	4.23184	3.79952	3.36926	2.95148	2.5554	2.18832	1.8552	1.55862		7.76681	6.60903	6.37159	6.09774	5.78684	5.44013	5.0611	4.65563	4.23184	3.79952
[S]12	0.0858993	6.93112	5.99409	5.79813	5.57048	5.30989	5.01654	4.69249	4.3419	3.97104	3.58796	3.20187	2.82224	2.45796	2.11648	1.80332	1.52184						6.93124	5.99413	5.79816	5.5705	5.30989	5.01652	4.69246	4.34185	3.97098	3.58789	3.20179	2.82216	2.45789	2.11641	1.80325	1.52178		6.93124	5.99413	5.79816	5.5705	5.30989	5.01652	4.69246	4.34185	3.97098	3.58789
[S]13	0.0687195	6.1095	5.3696	5.21181	5.02714	4.81393	4.57157	4.30091	4.00454	3.68697	3.35444	3.01459	2.67572	2.34608	2.033	1.74236	1.4782						6.10963	5.36965	5.21184	5.02716	4.81393	4.57155	4.30087	4.00449	3.68689	3.35436	3.01449	2.67563	2.34598	2.0329	1.74227	1.47811		6.10963	5.36965	5.21184	5.02716	4.81393	4.57155	4.30087	4.00449	3.68689	3.35436
[S]14	0.0549756	5.32106	4.75089	4.62695	4.48082	4.31065	4.11529	3.89465	3.65004	3.38434	3.10207	2.8092	2.51266	2.21977	1.93747	1.67171	1.42704						5.32118	4.75094	4.62698	4.48083	4.31064	4.11526	3.89461	3.64998	3.38425	3.10197	2.80909	2.51255	2.21965	1.93735	1.6716	1.42693		5.32118	4.75094	4.62698	4.48083	4.31064	4.11526	3.89461	3.64998	3.38425	3.10197
[S]15	0.0439805	4.58192	4.15277	4.05775	3.94493	3.81243	3.65881	3.48337	3.28638	3.06941	2.83542	2.58873	2.33481	2.07981	1.82998	1.59108	1.36786						4.58204	4.15281	4.05778	3.94494	3.81242	3.65878	3.48332	3.28631	3.06932	2.83531	2.58861	2.33468	2.07967	1.82984	1.59094	1.36773		4.58204	4.15281	4.05778	3.94494	3.81242	3.65878	3.48332	3.28631	3.06932	2.83531
	1	1	1	1	1	1	1	1	1	1	1	1	1	1	1	1	1																					1	1	13.6362	10.4289	9.84969	9.21031	8.51905	7.78837	7.03422	6.27474	5.52859	4.81316
	1	1	1	1	1	1	1	1	1	1	1	1	1	1	1	1	1					13.6364	13.6364	13.6362		-0.000136654	-0.000136654	4										0.8	0.8	13.3332	10.2507	9.69061	9.07106	8.39978	7.68857	6.95271	6.2098	5.47811	4.77485
	1	1	1	1	1	1	1	1	1	1	1	1	1	1	1	1	1					13.3333	13.3333	13.3332		-0.000117235	-0.000117235	4										0.64	0.64	12.9729	10.0364	9.49884	8.90282	8.25532	7.56736	6.85344	6.13048	5.41629	4.72781
	1	1	1	1	1	1	1	1	1	1	1	1	1	1	1	1	1					12.973	12.973	12.9729		-9.51123e-05	-9.51123e-05	4										0.512	0.512	12.5489	9.78075	9.26955	8.70109	8.08158	7.42111	6.73326	6.03414	5.34095	4.67031
	1	1	1	1	1	1	1	1	1	1	1	1	1	1	1	1	1					12.549	12.549	12.5489		-7.04334e-05	-7.04334e-05	4										0.4096	0.4096	12.0565	9.47896	8.99804	8.46143	7.87442	7.24606	6.58884	5.9179	5.24967	4.60036
	1	1	1	1	1	1	1	1	1	1	1	1	1	1	1	1	1					12.0565	12.0565	12.0565		-4.35941e-05	-4.35941e-05	4										0.32768	0.32768	11.4927	9.12694	8.68024	8.1798	7.62995	7.03853	6.4168	5.77874	5.13987	4.51582
	1	1	1	1	1	1	1	1	1	1	1	1	1	1	1	1	1					11.4927	11.4927	11.4927		-1.52835e-05	-1.52835e-05	4										0.262144	0.262144	10.858	8.72205	8.31321	7.85308	7.34491	6.79526	6.21398	5.61373	5.00892	4.41442
	1	1	1	1	1	1	1	1	1	1	1	1	1	1	1	1	1					10.858	10.858	10.858		1.35028e-05	1.35028e-05	4										0.209715	0.209715	10.1569	8.26381	7.89589	7.47963	7.01722	6.51383	5.97781	5.42026	4.85431	4.29389
	1	1	1	1	1	1	1	1	1	1	1	1	1	1	1	1	1					10.1568	10.1568	10.1569		4.15056e-05	4.15056e-05	4										0.167772	0.167772	9.39829	7.75454	7.42968	7.05997	6.64655	6.19322	5.70669	5.19641	4.67399	4.15218
	1	1	1	1	1	1	1	1	1	1	1	1	1	1	1	1	1					9.39822	9.39822	9.39829		6.73133e-05	6.73133e-05	4										0.134218	0.134218	8.59579	7.19991	6.91901	6.59728	6.23488	5.83427	5.40052	4.94132	4.46658	3.98768
	1	1	1	1	1	1	1	1	1	1	1	1	1	1	1	1	1					8.5957	8.5957	8.59579		8.95349e-05	8.95349e-05	4										0.107374	0.107374	7.76681	6.60903	6.37159	6.09774	5.78684	5.44013	5.0611	4.65563	4.23184	3.79952
	1	1	1	1	1	1	1	1	1	1	1	1	1	1	1	1	1					7.7667	7.7667	7.76681		0.000107006	0.000107006	4										0.0858993	0.0858993	6.93124	5.99413	5.79816	5.5705	5.30989	5.01652	4.69246	4.34185	3.97098	3.58789
	1	1	1	1	1	1	1	1	1	1	1	1	1	1	1	1	1					6.93112	6.93112	6.93124		0.000118976	0.000118976	4										0.0687195	0.0687195	6.10963	5.36965	5.21184	5.02716	4.81393	4.57155	4.30087	4.00449	3.68689	3.35436
	1	1	1	1	1	1	1	1	1	1	1	1	1	1	1	1	1					6.1095	6.1095	6.10963		0.000125226	0.000125226	4										0.0549756	0.0549756	5.32118	4.75094	4.62698	4.48083	4.31064	4.11526	3.89461	3.64998	3.38425	3.10197
	1	1	1	1	1	1	1	1	1	1	1	1	1	1	1	1	1					5.32106	5.32106	5.32118		0.000126076	0.000126076	4										0.0439805	0.0439805	4.58204	4.15281	4.05778	3.94494	3.81242	3.65878	3.48332	3.28631	3.06932	2.83531
																						4.58192	4.58192	4.58204		0.000122295	0.000122295	4
																						10.4289	10.4289	10.4289		-2.39174e-05	-2.39174e-05	4											1	0.0733341	0.0958876	0.101526	0.108574	0.117384	0.128396	0.142162	0.159369	0.180878	0.207764
																						10.2507	10.2507	10.2507		-1.96864e-05	-1.96864e-05	4											1.25	0.0750007	0.0975543	0.103193	0.110241	0.119051	0.130063	0.143829	0.161036	0.182545	0.209431
																						10.0364	10.0364	10.0364		-1.47729e-05	-1.47729e-05	4											1.5625	0.0770839	0.0996376	0.105276	0.112324	0.121134	0.132147	0.145912	0.163119	0.184628	0.211514
																						9.78076	9.78076	9.78075		-9.16392e-06	-9.16392e-06	4											1.95312	0.0796879	0.102242	0.10788	0.114928	0.123738	0.134751	0.148516	0.165724	0.187233	0.214119
																						9.47896	9.47896	9.47896		-2.89421e-06	-2.89421e-06	4											2.44141	0.082943	0.105497	0.111135	0.118183	0.126993	0.138006	0.151772	0.168979	0.190488	0.217374
																						9.12694	9.12694	9.12694		3.93734e-06	3.93734e-06	4											3.05176	0.0870118	0.109566	0.115204	0.122252	0.131062	0.142075	0.155841	0.173048	0.194557	0.221444
																						8.72204	8.72204	8.72205		1.11535e-05	1.11535e-05	4											3.8147	0.0920979	0.114652	0.12029	0.127339	0.136149	0.147161	0.160927	0.178135	0.199644	0.22653
																						8.26379	8.26379	8.26381		1.84929e-05	1.84929e-05	4											4.76837	0.0984554	0.12101	0.126648	0.133696	0.142507	0.153519	0.167285	0.184493	0.206002	0.232889
																						7.75451	7.75451	7.75454		2.56182e-05	2.56182e-05	4											5.96046	0.106402	0.128957	0.134595	0.141644	0.150454	0.161467	0.175233	0.192441	0.21395	0.240837
																						7.19988	7.19988	7.19991		3.21433e-05	3.21433e-05	4											7.45058	0.116336	0.138891	0.144529	0.151578	0.160388	0.171401	0.185167	0.202375	0.223885	0.250772
																						6.609	6.609	6.60903		3.76781e-05	3.76781e-05	4											9.31323	0.128753	0.151308	0.156947	0.163995	0.172806	0.183819	0.197585	0.214794	0.236304	0.263191
																						5.99409	5.99409	5.99413		4.18864e-05	4.18864e-05	4											11.6415	0.144274	0.16683	0.172469	0.179517	0.188328	0.199341	0.213108	0.230316	0.251827	0.278715
																						5.3696	5.3696	5.36965		4.45404e-05	4.45404e-05	4											14.5519	0.163676	0.186232	0.191871	0.19892	0.207731	0.218744	0.232511	0.24972	0.271231	0.29812
																						4.75089	4.75089	4.75094		4.556e-05	4.556e-05	4											18.1899	0.187928	0.210485	0.216124	0.223173	0.231984	0.242998	0.256765	0.273974	0.295486	0.322376
																						4.15277	4.15277	4.15281		4.50226e-05	4.50226e-05	4											22.7374	0.218243	0.240801	0.24644	0.253489	0.262301	0.273315	0.287083	0.304293	0.325805	0.352695
																						9.8497	9.8497	9.84969		-8.84382e-06	-8.84382e-06	4
																						9.69062	9.69062	9.69061		-6.51034e-06	-6.51034e-06	4												13.6364	10.4289	9.8497	9.2103	8.51903	7.78834	7.03418	6.27469	5.52854	4.8131
																						9.49885	9.49885	9.49884		-3.79299e-06	-3.79299e-06	4												13.3333	10.2507	9.69062	9.07106	8.39977	7.68854	6.95267	6.20975	5.47806	4.7748
																						9.26955	9.26955	9.26955		-6.81094e-07	-6.81094e-07	4												12.973	10.0364	9.49885	8.90281	8.2553	7.56733	6.8534	6.13044	5.41625	4.72777
																						8.99804	8.99804	8.99804		2.81048e-06	2.81048e-06	4												12.549	9.78076	9.26955	8.70108	8.08156	7.42109	6.73323	6.03411	5.34092	4.67027
																						8.68023	8.68023	8.68024		6.63132e-06	6.63132e-06	4												12.0565	9.47896	8.99804	8.46142	7.87441	7.24604	6.58882	5.91787	5.24965	4.60033
																						8.3132	8.3132	8.31321		1.06867e-05	1.06867e-05	4												11.4927	9.12694	8.68023	8.17979	7.62994	7.03852	6.41678	5.77872	5.13986	4.5158
																						7.89587	7.89587	7.89589		1.48327e-05	1.48327e-05	4												10.858	8.72204	8.3132	7.85307	7.3449	6.79525	6.21398	5.61372	5.00891	4.41441
																						7.42966	7.42966	7.42968		1.88791e-05	1.88791e-05	4												10.1568	8.26379	7.89587	7.47962	7.01721	6.51383	5.97781	5.42027	4.85432	4.2939
																						6.91899	6.91899	6.91901		2.26024e-05	2.26024e-05	4												9.39822	7.75451	7.42966	7.05996	6.64655	6.19322	5.7067	5.19642	4.674	4.1522
																						6.37156	6.37156	6.37159		2.57706e-05	2.57706e-05	4												8.5957	7.19988	6.91899	6.59727	6.23487	5.83428	5.40054	4.94134	4.46661	3.98772
																						5.79813	5.79813	5.79816		2.8176e-05	2.8176e-05	4												7.7667	6.609	6.37156	6.09772	5.78684	5.44015	5.06113	4.65567	4.23189	3.79957
																						5.21181	5.21181	5.21184		2.96691e-05	2.96691e-05	4												6.93112	5.99409	5.79813	5.57048	5.30989	5.01654	4.69249	4.3419	3.97104	3.58796
																						4.62695	4.62695	4.62698		3.01852e-05	3.01852e-05	4												6.1095	5.3696	5.21181	5.02714	4.81393	4.57157	4.30091	4.00454	3.68697	3.35444
																						4.05775	4.05775	4.05778		2.9754e-05	2.9754e-05	4												5.32106	4.75089	4.62695	4.48082	4.31065	4.11529	3.89465	3.65004	3.38434	3.10207
																						9.2103	9.2103	9.21031		5.9192e-06	5.9192e-06	4												4.58192	4.15277	4.05775	3.94493	3.81243	3.65881	3.48337	3.28638	3.06941	2.83542
																						9.07106	9.07106	9.07106		6.43502e-06	6.43502e-06	4
																						8.90281	8.90281	8.90282		7.03348e-06	7.03348e-06	4												1/s	0	0.0439805	0.0549756	0.0687195	0.0858993	0.107374	0.134218	0.167772	0.209715
																						8.70108	8.70108	8.70109		7.71527e-06	7.71527e-06	4											1	1	0.0733341	0.0958876	0.101526	0.108574	0.117384	0.128396	0.142162	0.159369	0.180878
																						8.46142	8.46142	8.46143		8.47457e-06	8.47457e-06	4											2	1.25	0.0750007	0.0975543	0.103193	0.110241	0.119051	0.130063	0.143829	0.161036	0.182545
																						8.17979	8.17979	8.1798		9.29647e-06	9.29647e-06	4											3	1.5625	0.0770839	0.0996376	0.105276	0.112324	0.121134	0.132147	0.145912	0.163119	0.184628
																						7.85307	7.85307	7.85308		1.01547e-05	1.01547e-05	4											4	1.95312	0.0796879	0.102242	0.10788	0.114928	0.123738	0.134751	0.148516	0.165724	0.187233
																						7.47962	7.47962	7.47963		1.10104e-05	1.10104e-05	4											5	2.44141	0.082943	0.105497	0.111135	0.118183	0.126993	0.138006	0.151772	0.168979	0.190488
																						7.05996	7.05996	7.05997		1.18125e-05	1.18125e-05	4											6	3.05176	0.0870118	0.109566	0.115204	0.122252	0.131062	0.142075	0.155841	0.173048	0.194557
																						6.59727	6.59727	6.59728		1.25012e-05	1.25012e-05	4											7	3.8147	0.0920979	0.114652	0.12029	0.127339	0.136149	0.147161	0.160927	0.178135	0.199644
																						6.09772	6.09772	6.09774		1.30144e-05	1.30144e-05	4											8	4.76837	0.0984554	0.12101	0.126648	0.133696	0.142507	0.153519	0.167285	0.184493	0.206002
																						5.57048	5.57048	5.5705		1.32965e-05	1.32965e-05	4											9	5.96046	0.106402	0.128957	0.134595	0.141644	0.150454	0.161467	0.175233	0.192441	0.21395
																						5.02714	5.02714	5.02716		1.33086e-05	1.33086e-05	4											10	7.45058	0.116336	0.138891	0.144529	0.151578	0.160388	0.171401	0.185167	0.202375	0.223885
																						4.48082	4.48082	4.48083		1.30354e-05	1.30354e-05	4											11	9.31323	0.128753	0.151308	0.156947	0.163995	0.172806	0.183819	0.197585	0.214794	0.236304
																						3.94493	3.94493	3.94494		1.24895e-05	1.24895e-05	4											12	11.6415	0.144274	0.16683	0.172469	0.179517	0.188328	0.199341	0.213108	0.230316	0.251827
																						8.51903	8.51903	8.51905		1.96637e-05	1.96637e-05	4											13	14.5519	0.163676	0.186232	0.191871	0.19892	0.207731	0.218744	0.232511	0.24972	0.271231
																						8.39977	8.39977	8.39978		1.85294e-05	1.85294e-05	4											14	18.1899	0.187928	0.210485	0.216124	0.223173	0.231984	0.242998	0.256765	0.273974	0.295486
																						8.2553	8.2553	8.25532		1.71882e-05	1.71882e-05	4											15	22.7374	0.218243	0.240801	0.24644	0.253489	0.262301	0.273315	0.287083	0.304293	0.325805
																						8.08156	8.08156	8.08158		1.56225e-05	1.56225e-05	4
																						7.87441	7.87441	7.87442		1.38234e-05	1.38234e-05	4
																						7.62994	7.62994	7.62995		1.17949e-05	1.17949e-05	4
																						7.3449	7.3449	7.34491		9.55911e-06	9.55911e-06	4
																						7.01721	7.01721	7.01722		7.16101e-06	7.16101e-06	4
																						6.64655	6.64655	6.64655		4.67034e-06	4.67034e-06	4
																						6.23487	6.23487	6.23488		2.18025e-06	2.18025e-06	4
																						5.78684	5.78684	5.78684		-1.99482e-07	-1.99482e-07	4
																						5.30989	5.30989	5.30989		-2.35456e-06	-2.35456e-06	4
																						4.81393	4.81393	4.81393		-4.18177e-06	-4.18177e-06	4
																						4.31065	4.31065	4.31064		-5.60476e-06	-5.60476e-06	4
																						3.81243	3.81243	3.81242		-6.58561e-06	-6.58561e-06	4
																						7.78834	7.78834	7.78837		3.16885e-05	3.16885e-05	4
																						7.68854	7.68854	7.68857		2.91513e-05	2.91513e-05	4
																						7.56733	7.56733	7.56736		2.61442e-05	2.61442e-05	4
																						7.42109	7.42109	7.42111		2.26247e-05	2.26247e-05	4
																						7.24604	7.24604	7.24606		1.85683e-05	1.85683e-05	4
																						7.03852	7.03852	7.03853		1.39796e-05	1.39796e-05	4
																						6.79525	6.79525	6.79526		8.9053e-06	8.9053e-06	4
																						6.51383	6.51383	6.51383		3.44531e-06	3.44531e-06	4
																						6.19322	6.19322	6.19322		-2.23895e-06	-2.23895e-06	4
																						5.83428	5.83428	5.83427		-7.92553e-06	-7.92553e-06	4
																						5.44015	5.44015	5.44013		-1.33451e-05	-1.33451e-05	4
																						5.01654	5.01654	5.01652		-1.82079e-05	-1.82079e-05	4
																						4.57157	4.57157	4.57155		-2.22425e-05	-2.22425e-05	4
																						4.11529	4.11529	4.11526		-2.52376e-05	-2.52376e-05	4
																						3.65881	3.65881	3.65878		-2.70768e-05	-2.70768e-05	4
																						7.03418	7.03418	7.03422		4.14017e-05	4.14017e-05	4
																						6.95267	6.95267	6.95271		3.77673e-05	3.77673e-05	4
																						6.8534	6.8534	6.85344		3.34409e-05	3.34409e-05	4
																						6.73323	6.73323	6.73326		2.83505e-05	2.83505e-05	4
																						6.58882	6.58882	6.58884		2.24458e-05	2.24458e-05	4
																						6.41678	6.41678	6.4168		1.57149e-05	1.57149e-05	4
																						6.21398	6.21398	6.21398		8.20304e-06	8.20304e-06	4
																						5.97781	5.97781	5.97781		3.2732e-08	3.2732e-08	4
																						5.7067	5.7067	5.70669		-8.58086e-06	-8.58086e-06	4
																						5.40054	5.40054	5.40052		-1.73243e-05	-1.73243e-05	4
																						5.06113	5.06113	5.0611		-2.57974e-05	-2.57974e-05	4
																						4.69249	4.69249	4.69246		-3.35473e-05	-3.35473e-05	4
																						4.30091	4.30091	4.30087		-4.01225e-05	-4.01225e-05	4
																						3.89465	3.89465	3.89461		-4.51398e-05	-4.51398e-05	4
																						3.48337	3.48337	3.48332		-4.83476e-05	-4.83476e-05	4
																						6.27469	6.27469	6.27474		4.84137e-05	4.84137e-05	4
																						6.20975	6.20975	6.2098		4.40166e-05	4.40166e-05	4
																						6.13044	6.13044	6.13048		3.87572e-05	3.87572e-05	4
																						6.03411	6.03411	6.03414		3.25323e-05	3.25323e-05	4
																						5.91787	5.91787	5.9179		2.52598e-05	2.52598e-05	4
																						5.77872	5.77872	5.77874		1.68972e-05	1.68972e-05	4
																						5.61372	5.61372	5.61373		7.46617e-06	7.46617e-06	4
																						5.42027	5.42027	5.42026		-2.92144e-06	-2.92144e-06	4
																						5.19642	5.19642	5.19641		-1.40383e-05	-1.40383e-05	4
																						4.94134	4.94134	4.94132		-2.55262e-05	-2.55262e-05	4
																						4.65567	4.65567	4.65563		-3.68993e-05	-3.68993e-05	4
																						4.3419	4.3419	4.34185		-4.75739e-05	-4.75739e-05	4
																						4.00454	4.00454	4.00449		-5.69289e-05	-5.69289e-05	4
																						3.65004	3.65004	3.64998		-6.43897e-05	-6.43897e-05	4
																						3.28638	3.28638	3.28631		-6.952e-05	-6.952e-05	4
																						5.52854	5.52854	5.52859		5.25957e-05	5.25957e-05	4
																						5.47806	5.47806	5.47811		4.77661e-05	4.77661e-05	4
																						5.41625	5.41625	5.41629		4.19608e-05	4.19608e-05	4
																						5.34092	5.34092	5.34095		3.50485e-05	3.50485e-05	4
																						5.24965	5.24965	5.24967		2.6913e-05	2.6913e-05	4
																						5.13986	5.13986	5.13987		1.74738e-05	1.74738e-05	4
																						5.00891	5.00891	5.00892		6.71169e-06	6.71169e-06	4
																						4.85432	4.85432	4.85431		-5.29921e-06	-5.29921e-06	4
																						4.674	4.674	4.67399		-1.8359e-05	-1.8359e-05	4
																						4.46661	4.46661	4.46658		-3.21151e-05	-3.21151e-05	4
																						4.23189	4.23189	4.23184		-4.60514e-05	-4.60514e-05	4
																						3.97104	3.97104	3.97098		-5.95055e-05	-5.95055e-05	4
																						3.68697	3.68697	3.68689		-7.17226e-05	-7.17226e-05	4
																						3.38434	3.38434	3.38425		-8.19449e-05	-8.19449e-05	4
																						3.06941	3.06941	3.06932		-8.95234e-05	-8.95234e-05	4
																						4.8131	4.8131	4.81316		5.40862e-05	5.40862e-05	4
																						4.7748	4.7748	4.77485		4.91201e-05	4.91201e-05	4
																						4.72777	4.72777	4.72781		4.31222e-05	4.31222e-05	4
																						4.67027	4.67027	4.67031		3.59379e-05	3.59379e-05	4
																						4.60033	4.60033	4.60036		2.74207e-05	2.74207e-05	4
																						4.5158	4.5158	4.51582		1.74502e-05	1.74502e-05	4
																						4.41441	4.41441	4.41442		5.95833e-06	5.95833e-06	4
																						4.2939	4.2939	4.29389		-7.03735e-06	-7.03735e-06	4
																						4.1522	4.1522	4.15218		-2.13956e-05	-2.13956e-05	4
																						3.98772	3.98772	3.98768		-3.68145e-05	-3.68145e-05	4
																						3.79957	3.79957	3.79952		-5.28058e-05	-5.28058e-05	4
																						3.58796	3.58796	3.58789		-6.86932e-05	-6.86932e-05	4
																						3.35444	3.35444	3.35436		-8.36478e-05	-8.36478e-05	4
																						3.10207	3.10207	3.10197		-9.67684e-05	-9.67684e-05	4
																						2.83542	2.83542	2.83531		-0.000107199	-0.000107199	4
																						4.14294	4.14294	4.143		5.3245e-05	5.3245e-05	4
																						4.11453	4.11453	4.11458		4.83843e-05	4.83843e-05	4
																						4.07956	4.07956	4.0796		4.24866e-05	4.24866e-05	4
																						4.03668	4.03668	4.03671		3.53824e-05	3.53824e-05	4
																						3.98432	3.98432	3.98435		2.69013e-05	2.69013e-05	4
																						3.92076	3.92076	3.92077		1.68877e-05	1.68877e-05	4
																						3.8441	3.8441	3.8441		5.22468e-06	5.22468e-06	4
																						3.75239	3.75239	3.75238		-8.13413e-06	-8.13413e-06	4
																						3.64373	3.64373	3.64371		-2.31248e-05	-2.31248e-05	4
																						3.51644	3.51644	3.5164		-3.95298e-05	-3.95298e-05	4
																						3.36932	3.36932	3.36926		-5.6939e-05	-5.6939e-05	4
																						3.20187	3.20187	3.20179		-7.47277e-05	-7.47277e-05	4
																						3.01459	3.01459	3.01449		-9.20674e-05	-9.20674e-05	4
																						2.8092	2.8092	2.80909		-0.000107982	-0.000107982	4
																						2.58873	2.58873	2.58861		-0.000121455	-0.000121455	4
																						3.52877	3.52877	3.52882		5.05736e-05	5.05736e-05	4
																						3.50814	3.50814	3.50819		4.59962e-05	4.59962e-05	4
																						3.48269	3.48269	3.48273		4.04185e-05	4.04185e-05	4
																						3.45138	3.45138	3.45142		3.36643e-05	3.36643e-05	4
																						3.41304	3.41304	3.41306		2.55484e-05	2.55484e-05	4
																						3.36629	3.36629	3.36631		1.5889e-05	1.5889e-05	4
																						3.30962	3.30962	3.30963		4.52739e-06	4.52739e-06	4
																						3.24142	3.24142	3.24141		-8.64389e-06	-8.64389e-06	4
																						3.16001	3.16001	3.15999		-2.36432e-05	-2.36432e-05	4
																						3.06383	3.06383	3.06379		-4.03546e-05	-4.03546e-05	4
																						2.95154	2.95154	2.95148		-5.84808e-05	-5.84808e-05	4
																						2.82224	2.82224	2.82216		-7.75038e-05	-7.75038e-05	4
																						2.67572	2.67572	2.67563		-9.66697e-05	-9.66697e-05	4
																						2.51266	2.51266	2.51255		-0.000115013	-0.000115013	4
																						2.33481	2.33481	2.33468		-0.000131433	-0.000131433	4
																						2.9771	2.9771	2.97715		4.66244e-05	4.66244e-05	4
																						2.9624	2.9624	2.96244		4.24451e-05	4.24451e-05	4
																						2.94423	2.94423	2.94427		3.73329e-05	3.73329e-05	4
																						2.92183	2.92183	2.92186		3.11125e-05	3.11125e-05	4
																						2.8943	2.8943	2.89432		2.35937e-05	2.35937e-05	4
																						2.86061	2.86061	2.86062		1.45791e-05	1.45791e-05	4
																						2.81959	2.81959	2.81959		3.87981e-06	3.87981e-06	4
																						2.76993	2.76993	2.76992		-8.66191e-06	-8.66191e-06	4
																						2.71027	2.71027	2.71024		-2.31396e-05	-2.31396e-05	4
																						2.63921	2.63921	2.63917		-3.95401e-05	-3.95401e-05	4
																						2.55546	2.55546	2.5554		-5.76937e-05	-5.76937e-05	4
																						2.45796	2.45796	2.45789		-7.72245e-05	-7.72245e-05	4
																						2.34608	2.34608	2.34598		-9.75128e-05	-9.75128e-05	4
																						2.21977	2.21977	2.21965		-0.000117687	-0.000117687	4
																						2.07981	2.07981	2.07967		-0.000136662	-0.000136662	4
																						2.49042	2.49042	2.49046		4.19229e-05	4.19229e-05	4
																						2.48013	2.48013	2.48017		3.82017e-05	3.82017e-05	4
																						2.46738	2.46738	2.46741		3.36342e-05	3.36342e-05	4
																						2.45163	2.45163	2.45165		2.80528e-05	2.80528e-05	4
																						2.43222	2.43222	2.43224		2.12704e-05	2.12704e-05	4
																						2.40838	2.40838	2.40839		1.30852e-05	1.30852e-05	4
																						2.37924	2.37924	2.37924		3.29114e-06	3.29114e-06	4
																						2.34378	2.34378	2.34377		-8.30465e-06	-8.30465e-06	4
																						2.30092	2.30092	2.3009		-2.18558e-05	-2.18558e-05	4
																						2.2495	2.2495	2.24947		-3.74395e-05	-3.74395e-05	4
																						2.18838	2.18838	2.18832		-5.501e-05	-5.501e-05	4
																						2.11648	2.11648	2.11641		-7.43452e-05	-7.43452e-05	4
																						2.033	2.033	2.0329		-9.49953e-05	-9.49953e-05	4
																						1.93747	1.93747	1.93735		-0.000116248	-0.000116248	4
																						1.82998	1.82998	1.82984		-0.000137128	-0.000137128	4
																						2.06787	2.06787	2.06791		3.69151e-05	3.69151e-05	4
																						2.06077	2.06077	2.0608		3.36689e-05	3.36689e-05	4
																						2.05196	2.05196	2.05199		2.96723e-05	2.96723e-05	4
																						2.04105	2.04105	2.04107		2.47703e-05	2.47703e-05	4
																						2.02758	2.02758	2.0276		1.87855e-05	1.87855e-05	4
																						2.01099	2.01099	2.011		1.1521e-05	1.1521e-05	4
																						1.99063	1.99063	1.99063		2.76633e-06	2.76633e-06	4
																						1.96575	1.96575	1.96574		-7.69085e-06	-7.69085e-06	4
																						1.93551	1.93551	1.93549		-2.00451e-05	-2.00451e-05	4
																						1.899	1.899	1.89896		-3.44439e-05	-3.44439e-05	4
																						1.85525	1.85525	1.8552		-5.09474e-05	-5.09474e-05	4
																						1.80332	1.80332	1.80325		-6.94781e-05	-6.94781e-05	4
																						1.74236	1.74236	1.74227		-8.97647e-05	-8.97647e-05	4
																						1.67171	1.67171	1.6716		-0.00011129	-0.00011129	4
																						1.59108	1.59108	1.59094		-0.000133261	-0.000133261	4
																						1.70604	1.70604	1.70607		3.19431e-05	3.19431e-05	4
																						1.7012	1.7012	1.70123		2.9158e-05	2.9158e-05	4
																						1.69519	1.69519	1.69522		2.57202e-05	2.57202e-05	4
																						1.68774	1.68774	1.68776		2.14897e-05	2.14897e-05	4
																						1.67852	1.67852	1.67854		1.6304e-05	1.6304e-05	4
																						1.66713	1.66713	1.66714		9.97782e-06	9.97782e-06	4
																						1.65312	1.65312	1.65312		2.30649e-06	2.30649e-06	4
																						1.63592	1.63592	1.63591		-6.92733e-06	-6.92733e-06	4
																						1.61493	1.61493	1.61491		-1.79403e-05	-1.79403e-05	4
																						1.58943	1.58943	1.5894		-3.09269e-05	-3.09269e-05	4
																						1.55866	1.55866	1.55862		-4.60275e-05	-4.60275e-05	4
																						1.52184	1.52184	1.52178		-6.32857e-05	-6.32857e-05	4
																						1.4782	1.4782	1.47811		-8.25942e-05	-8.25942e-05	4
																						1.42704	1.42704	1.42693		-0.000103637	-0.000103637	4
																						1.36786	1.36786	1.36773		-0.000125839	-0.000125839	4
[truncated: 54 more columns]

## Sheet: Modifier equation
																							Calculated values
		No Inhibitor	[I]1	[I]2	[I]3	[I]4	[I]5	[I]6	[I]7	[I]8	[I]9	[I]10	[I]11	[I]12	[I]13	[I]14	[I]15					Ki	No Inhibitor	[I]1	[I]2	[I]3	[I]4	[I]5	[I]6	[I]7	[I]8	[I]9	[I]10	[I]11	[I]12	[I]13	[I]14	[I]15
		0	0.0439805	0.0549756	0.0687195	0.0858993	0.107374	0.134218	0.167772	0.209715	0.262144	0.32768	0.4096	0.512	0.64	0.8	1	K1	0.0999976	V1	14.9999	0.130002	0	0.0439805	0.0549756	0.0687195	0.0858993	0.107374	0.134218	0.167772	0.209715	0.262144	0.32768	0.4096	0.512	0.64	0.8	1
[S]1	1	13.6364	10.4289	9.8497	9.2103	8.51903	7.78834	7.03418	6.27469	5.52854	4.8131	4.14294	3.52877	2.9771	2.49042	2.06787	1.70604	K2	4.56839e-07	V2	0		13.6363	10.4289	9.84966	9.21027	8.519	7.78833	7.03417	6.27469	5.52854	4.8131	4.14294	3.52878	2.9771	2.49043	2.06787	1.70604		13.6363	10.4289	9.84966	9.21027	8.519	7.78833	7.03417	6.27469	5.52854	4.8131
[S]2	0.8	13.3333	10.2507	9.69062	9.07106	8.39977	7.68854	6.95267	6.20975	5.47806	4.7748	4.11453	3.50814	2.9624	2.48013	2.06077	1.7012						13.3333	10.2507	9.69058	9.07103	8.39974	7.68853	6.95266	6.20975	5.47806	4.7748	4.11453	3.50814	2.9624	2.48013	2.06077	1.7012		13.3333	10.2507	9.69058	9.07103	8.39974	7.68853	6.95266	6.20975	5.47806	4.7748
[S]3	0.64	12.973	10.0364	9.49885	8.90281	8.2553	7.56733	6.8534	6.13044	5.41625	4.72777	4.07956	3.48269	2.94423	2.46738	2.05196	1.69519						12.9729	10.0364	9.49882	8.90279	8.25528	7.56732	6.85339	6.13044	5.41625	4.72777	4.07956	3.48269	2.94423	2.46738	2.05196	1.69519		12.9729	10.0364	9.49882	8.90279	8.25528	7.56732	6.85339	6.13044	5.41625	4.72777
[S]4	0.512	12.549	9.78076	9.26955	8.70108	8.08156	7.42109	6.73323	6.03411	5.34092	4.67027	4.03668	3.45138	2.92183	2.45163	2.04105	1.68774						12.549	9.78073	9.26952	8.70106	8.08155	7.42107	6.73322	6.03411	5.34092	4.67027	4.03668	3.45139	2.92183	2.45163	2.04105	1.68774		12.549	9.78073	9.26952	8.70106	8.08155	7.42107	6.73322	6.03411	5.34092	4.67027
[S]5	0.4096	12.0565	9.47896	8.99804	8.46142	7.87441	7.24604	6.58882	5.91787	5.24965	4.60033	3.98432	3.41304	2.8943	2.43222	2.02758	1.67852						12.0565	9.47894	8.99802	8.4614	7.8744	7.24603	6.58881	5.91787	5.24965	4.60033	3.98432	3.41304	2.8943	2.43222	2.02758	1.67852		12.0565	9.47894	8.99802	8.4614	7.8744	7.24603	6.58881	5.91787	5.24965	4.60033
[S]6	0.32768	11.4927	9.12694	8.68023	8.17979	7.62994	7.03852	6.41678	5.77872	5.13986	4.5158	3.92076	3.36629	2.86061	2.40838	2.01099	1.66713			Sum R2	6.12764e-08		11.4927	9.12692	8.68021	8.17978	7.62993	7.03851	6.41678	5.77872	5.13986	4.5158	3.92076	3.36629	2.86061	2.40838	2.01099	1.66714		11.4927	9.12692	8.68021	8.17978	7.62993	7.03851	6.41678	5.77872	5.13986	4.5158
[S]7	0.262144	10.858	8.72204	8.3132	7.85307	7.3449	6.79525	6.21398	5.61372	5.00891	4.41441	3.8441	3.30962	2.81959	2.37924	1.99063	1.65312			Sum residuals %	0.000398504		10.858	8.72203	8.31319	7.85306	7.34489	6.79524	6.21397	5.61372	5.00891	4.41441	3.8441	3.30962	2.81959	2.37924	1.99063	1.65312		10.858	8.72203	8.31319	7.85306	7.34489	6.79524	6.21397	5.61372	5.00891	4.41441
[S]8	0.209715	10.1568	8.26379	7.89587	7.47962	7.01721	6.51383	5.97781	5.42027	4.85432	4.2939	3.75239	3.24142	2.76993	2.34378	1.96575	1.63592						10.1568	8.26378	7.89587	7.47962	7.01721	6.51383	5.97781	5.42027	4.85432	4.2939	3.75239	3.24142	2.76993	2.34378	1.96575	1.63592		10.1568	8.26378	7.89587	7.47962	7.01721	6.51383	5.97781	5.42027	4.85432	4.2939
[S]9	0.167772	9.39822	7.75451	7.42966	7.05996	6.64655	6.19322	5.7067	5.19642	4.674	4.1522	3.64373	3.16001	2.71027	2.30092	1.93551	1.61493						9.39823	7.75451	7.42966	7.05996	6.64655	6.19323	5.7067	5.19643	4.67401	4.15221	3.64373	3.16002	2.71027	2.30092	1.93551	1.61493		9.39823	7.75451	7.42966	7.05996	6.64655	6.19323	5.7067	5.19643	4.67401	4.15221
[S]10	0.134218	8.5957	7.19988	6.91899	6.59727	6.23487	5.83428	5.40054	4.94134	4.46661	3.98772	3.51644	3.06383	2.63921	2.2495	1.899	1.58943						8.59572	7.19989	6.919	6.59727	6.23488	5.83428	5.40054	4.94135	4.46661	3.98772	3.51645	3.06384	2.63921	2.24951	1.899	1.58943		8.59572	7.19989	6.919	6.59727	6.23488	5.83428	5.40054	4.94135	4.46661	3.98772
[S]11	0.107374	7.7667	6.609	6.37156	6.09772	5.78684	5.44015	5.06113	4.65567	4.23189	3.79957	3.36932	2.95154	2.55546	2.18838	1.85525	1.55866						7.76672	6.60901	6.37157	6.09774	5.78685	5.44016	5.06114	4.65568	4.23189	3.79957	3.36932	2.95154	2.55546	2.18838	1.85525	1.55866		7.76672	6.60901	6.37157	6.09774	5.78685	5.44016	5.06114	4.65568	4.23189	3.79957
[S]12	0.0858993	6.93112	5.99409	5.79813	5.57048	5.30989	5.01654	4.69249	4.3419	3.97104	3.58796	3.20187	2.82224	2.45796	2.11648	1.80332	1.52184						6.93115	5.99411	5.79815	5.5705	5.3099	5.01655	4.6925	4.34191	3.97105	3.58797	3.20187	2.82224	2.45796	2.11648	1.80332	1.52184		6.93115	5.99411	5.79815	5.5705	5.3099	5.01655	4.6925	4.34191	3.97105	3.58797
[S]13	0.0687195	6.1095	5.3696	5.21181	5.02714	4.81393	4.57157	4.30091	4.00454	3.68697	3.35444	3.01459	2.67572	2.34608	2.033	1.74236	1.4782						6.10954	5.36963	5.21183	5.02716	4.81395	4.57159	4.30092	4.00455	3.68697	3.35445	3.01459	2.67573	2.34608	2.033	1.74235	1.4782		6.10954	5.36963	5.21183	5.02716	4.81395	4.57159	4.30092	4.00455	3.68697	3.35445
[S]14	0.0549756	5.32106	4.75089	4.62695	4.48082	4.31065	4.11529	3.89465	3.65004	3.38434	3.10207	2.8092	2.51266	2.21977	1.93747	1.67171	1.42704						5.32109	4.75092	4.62697	4.48084	4.31067	4.11531	3.89467	3.65005	3.38435	3.10208	2.8092	2.51267	2.21977	1.93747	1.67171	1.42703		5.32109	4.75092	4.62697	4.48084	4.31067	4.11531	3.89467	3.65005	3.38435	3.10208
[S]15	0.0439805	4.58192	4.15277	4.05775	3.94493	3.81243	3.65881	3.48337	3.28638	3.06941	2.83542	2.58873	2.33481	2.07981	1.82998	1.59108	1.36786						4.58196	4.1528	4.05778	3.94495	3.81245	3.65883	3.48338	3.28639	3.06942	2.83542	2.58873	2.33481	2.07981	1.82998	1.59107	1.36786		4.58196	4.1528	4.05778	3.94495	3.81245	3.65883	3.48338	3.28639	3.06942	2.83542
	1	1	1	1	1	1	1	1	1	1	1	1	1	1	1	1	1																					1	1	13.6363	10.4289	9.84966	9.21027	8.519	7.78833	7.03417	6.27469	5.52854	4.8131
	1	1	1	1	1	1	1	1	1	1	1	1	1	1	1	1	1					13.6364	13.6364	13.6363		-8.69061e-05	-8.69061e-05	5										0.8	0.8	13.3333	10.2507	9.69058	9.07103	8.39974	7.68853	6.95266	6.20975	5.47806	4.7748
	1	1	1	1	1	1	1	1	1	1	1	1	1	1	1	1	1					13.3333	13.3333	13.3333		-7.86246e-05	-7.86246e-05	5										0.64	0.64	12.9729	10.0364	9.49882	8.90279	8.25528	7.56732	6.85339	6.13044	5.41625	4.72777
	1	1	1	1	1	1	1	1	1	1	1	1	1	1	1	1	1					12.973	12.973	12.9729		-6.91519e-05	-6.91519e-05	5										0.512	0.512	12.549	9.78073	9.26952	8.70106	8.08155	7.42107	6.73322	6.03411	5.34092	4.67027
	1	1	1	1	1	1	1	1	1	1	1	1	1	1	1	1	1					12.549	12.549	12.549		-5.85303e-05	-5.85303e-05	5										0.4096	0.4096	12.0565	9.47894	8.99802	8.4614	7.8744	7.24603	6.58881	5.91787	5.24965	4.60033
	1	1	1	1	1	1	1	1	1	1	1	1	1	1	1	1	1					12.0565	12.0565	12.0565		-4.69006e-05	-4.69006e-05	5										0.32768	0.32768	11.4927	9.12692	8.68021	8.17978	7.62993	7.03851	6.41678	5.77872	5.13986	4.5158
	1	1	1	1	1	1	1	1	1	1	1	1	1	1	1	1	1					11.4927	11.4927	11.4927		-3.45231e-05	-3.45231e-05	5										0.262144	0.262144	10.858	8.72203	8.31319	7.85306	7.34489	6.79524	6.21397	5.61372	5.00891	4.41441
	1	1	1	1	1	1	1	1	1	1	1	1	1	1	1	1	1					10.858	10.858	10.858		-2.17849e-05	-2.17849e-05	5										0.209715	0.209715	10.1568	8.26378	7.89587	7.47962	7.01721	6.51383	5.97781	5.42027	4.85432	4.2939
	1	1	1	1	1	1	1	1	1	1	1	1	1	1	1	1	1					10.1568	10.1568	10.1568		-9.18508e-06	-9.18508e-06	5										0.167772	0.167772	9.39823	7.75451	7.42966	7.05996	6.64655	6.19323	5.7067	5.19643	4.67401	4.15221
	1	1	1	1	1	1	1	1	1	1	1	1	1	1	1	1	1					9.39822	9.39822	9.39823		2.70677e-06	2.70677e-06	5										0.134218	0.134218	8.59572	7.19989	6.919	6.59727	6.23488	5.83428	5.40054	4.94135	4.46661	3.98772
	1	1	1	1	1	1	1	1	1	1	1	1	1	1	1	1	1					8.5957	8.5957	8.59572		1.33177e-05	1.33177e-05	5										0.107374	0.107374	7.76672	6.60901	6.37157	6.09774	5.78685	5.44016	5.06114	4.65568	4.23189	3.79957
	1	1	1	1	1	1	1	1	1	1	1	1	1	1	1	1	1					7.7667	7.7667	7.76672		2.21531e-05	2.21531e-05	5										0.0858993	0.0858993	6.93115	5.99411	5.79815	5.5705	5.3099	5.01655	4.6925	4.34191	3.97105	3.58797
	1	1	1	1	1	1	1	1	1	1	1	1	1	1	1	1	1					6.93112	6.93112	6.93115		2.88724e-05	2.88724e-05	5										0.0687195	0.0687195	6.10954	5.36963	5.21183	5.02716	4.81395	4.57159	4.30092	4.00455	3.68697	3.35445
	1	1	1	1	1	1	1	1	1	1	1	1	1	1	1	1	1					6.1095	6.1095	6.10954		3.33394e-05	3.33394e-05	5										0.0549756	0.0549756	5.32109	4.75092	4.62697	4.48084	4.31067	4.11531	3.89467	3.65005	3.38435	3.10208
	1	1	1	1	1	1	1	1	1	1	1	1	1	1	1	1	1					5.32106	5.32106	5.32109		3.56309e-05	3.56309e-05	5										0.0439805	0.0439805	4.58196	4.1528	4.05778	3.94495	3.81245	3.65883	3.48338	3.28639	3.06942	2.83542
																						4.58192	4.58192	4.58196		3.60045e-05	3.60045e-05	5
																						10.4289	10.4289	10.4289		-4.30598e-05	-4.30598e-05	5											1	0.0733338	0.0958878	0.101526	0.108574	0.117385	0.128397	0.142163	0.159371	0.18088	0.207766
																						10.2507	10.2507	10.2507		-3.92344e-05	-3.92344e-05	5											1.25	0.0750004	0.0975545	0.103193	0.110241	0.119051	0.130064	0.14383	0.161037	0.182546	0.209433
																						10.0364	10.0364	10.0364		-3.4775e-05	-3.4775e-05	5											1.5625	0.0770837	0.0996378	0.105276	0.112324	0.121135	0.132147	0.145913	0.16312	0.18463	0.211516
																						9.78076	9.78076	9.78073		-2.96595e-05	-2.96595e-05	5											1.95312	0.0796879	0.102242	0.10788	0.114929	0.123739	0.134751	0.148517	0.165725	0.187234	0.21412
																						9.47896	9.47896	9.47894		-2.39048e-05	-2.39048e-05	5											2.44141	0.082943	0.105497	0.111136	0.118184	0.126994	0.138007	0.151772	0.16898	0.190489	0.217376
																						9.12694	9.12694	9.12692		-1.75817e-05	-1.75817e-05	5											3.05176	0.087012	0.109566	0.115205	0.122253	0.131063	0.142076	0.155841	0.173049	0.194558	0.221445
																						8.72204	8.72204	8.72203		-1.08275e-05	-1.08275e-05	5											3.8147	0.0920982	0.114652	0.120291	0.127339	0.136149	0.147162	0.160928	0.178135	0.199644	0.226531
																						8.26379	8.26379	8.26378		-3.85223e-06	-3.85223e-06	5											4.76837	0.0984559	0.12101	0.126648	0.133697	0.142507	0.15352	0.167285	0.184493	0.206002	0.232889
																						7.75451	7.75451	7.75451		3.06607e-06	3.06607e-06	5											5.96046	0.106403	0.128957	0.134596	0.141644	0.150454	0.161467	0.175233	0.19244	0.213949	0.240836
																						7.19988	7.19988	7.19989		9.60234e-06	9.60234e-06	5											7.45058	0.116337	0.138891	0.14453	0.151578	0.160388	0.171401	0.185167	0.202374	0.223883	0.25077
																						6.609	6.609	6.60901		1.54207e-05	1.54207e-05	5											9.31323	0.128754	0.151309	0.156947	0.163995	0.172805	0.183818	0.197584	0.214792	0.236301	0.263187
																						5.99409	5.99409	5.99411		2.02213e-05	2.02213e-05	5											11.6415	0.144276	0.16683	0.172469	0.179517	0.188327	0.19934	0.213106	0.230313	0.251823	0.278709
																						5.3696	5.3696	5.36963		2.37874e-05	2.37874e-05	5											14.5519	0.163679	0.186233	0.191871	0.198919	0.20773	0.218742	0.232508	0.249716	0.271225	0.298112
																						4.75089	4.75089	4.75092		2.60192e-05	2.60192e-05	5											18.1899	0.187931	0.210486	0.216124	0.223172	0.231983	0.242995	0.256761	0.273969	0.295478	0.322365
																						4.15277	4.15277	4.1528		2.69455e-05	2.69455e-05	5											22.7374	0.218247	0.240802	0.24644	0.253488	0.262299	0.273311	0.287077	0.304285	0.325794	0.352681
																						9.8497	9.8497	9.84966		-3.66767e-05	-3.66767e-05	5
																						9.69062	9.69062	9.69058		-3.34469e-05	-3.34469e-05	5												13.6364	10.4289	9.8497	9.2103	8.51903	7.78834	7.03418	6.27469	5.52854	4.8131
																						9.49885	9.49885	9.49882		-2.96686e-05	-2.96686e-05	5												13.3333	10.2507	9.69062	9.07106	8.39977	7.68854	6.95267	6.20975	5.47806	4.7748
																						9.26955	9.26955	9.26952		-2.53162e-05	-2.53162e-05	5												12.973	10.0364	9.49885	8.90281	8.2553	7.56733	6.8534	6.13044	5.41625	4.72777
																						8.99804	8.99804	8.99802		-2.0395e-05	-2.0395e-05	5												12.549	9.78076	9.26955	8.70108	8.08156	7.42109	6.73323	6.03411	5.34092	4.67027
																						8.68023	8.68023	8.68021		-1.49551e-05	-1.49551e-05	5												12.0565	9.47896	8.99804	8.46142	7.87441	7.24604	6.58882	5.91787	5.24965	4.60033
																						8.3132	8.3132	8.31319		-9.10274e-06	-9.10274e-06	5												11.4927	9.12694	8.68023	8.17979	7.62994	7.03852	6.41678	5.77872	5.13986	4.5158
																						7.89587	7.89587	7.89587		-3.00833e-06	-3.00833e-06	5												10.858	8.72204	8.3132	7.85307	7.3449	6.79525	6.21398	5.61372	5.00891	4.41441
																						7.42966	7.42966	7.42966		3.0953e-06	3.0953e-06	5												10.1568	8.26379	7.89587	7.47962	7.01721	6.51383	5.97781	5.42027	4.85432	4.2939
																						6.91899	6.91899	6.919		8.92744e-06	8.92744e-06	5												9.39822	7.75451	7.42966	7.05996	6.64655	6.19322	5.7067	5.19642	4.674	4.1522
																						6.37156	6.37156	6.37157		1.41884e-05	1.41884e-05	5												8.5957	7.19988	6.91899	6.59727	6.23487	5.83428	5.40054	4.94134	4.46661	3.98772
																						5.79813	5.79813	5.79815		1.85997e-05	1.85997e-05	5												7.7667	6.609	6.37156	6.09772	5.78684	5.44015	5.06113	4.65567	4.23189	3.79957
																						5.21181	5.21181	5.21183		2.19468e-05	2.19468e-05	5												6.93112	5.99409	5.79813	5.57048	5.30989	5.01654	4.69249	4.3419	3.97104	3.58796
																						4.62695	4.62695	4.62697		2.41137e-05	2.41137e-05	5												6.1095	5.3696	5.21181	5.02714	4.81393	4.57157	4.30091	4.00454	3.68697	3.35444
																						4.05775	4.05775	4.05778		2.50988e-05	2.50988e-05	5												5.32106	4.75089	4.62695	4.48082	4.31065	4.11529	3.89465	3.65004	3.38434	3.10207
																						9.2103	9.2103	9.21027		-3.01753e-05	-3.01753e-05	5												4.58192	4.15277	4.05775	3.94493	3.81243	3.65881	3.48337	3.28638	3.06941	2.83542
																						9.07106	9.07106	9.07103		-2.75358e-05	-2.75358e-05	5
																						8.90281	8.90281	8.90279		-2.44359e-05	-2.44359e-05	5												1/s	0	0.0439805	0.0549756	0.0687195	0.0858993	0.107374	0.134218	0.167772	0.209715
																						8.70108	8.70108	8.70106		-2.08481e-05	-2.08481e-05	5											1	1	0.0733338	0.0958878	0.101526	0.108574	0.117385	0.128397	0.142163	0.159371	0.18088
																						8.46142	8.46142	8.4614		-1.67686e-05	-1.67686e-05	5											2	1.25	0.0750004	0.0975545	0.103193	0.110241	0.119051	0.130064	0.14383	0.161037	0.182546
																						8.17979	8.17979	8.17978		-1.22284e-05	-1.22284e-05	5											3	1.5625	0.0770837	0.0996378	0.105276	0.112324	0.121135	0.132147	0.145913	0.16312	0.18463
																						7.85307	7.85307	7.85306		-7.30481e-06	-7.30481e-06	5											4	1.95312	0.0796879	0.102242	0.10788	0.114929	0.123739	0.134751	0.148517	0.165725	0.187234
																						7.47962	7.47962	7.47962		-2.12911e-06	-2.12911e-06	5											5	2.44141	0.082943	0.105497	0.111136	0.118184	0.126994	0.138007	0.151772	0.16898	0.190489
																						7.05996	7.05996	7.05996		3.11179e-06	3.11179e-06	5											6	3.05176	0.087012	0.109566	0.115205	0.122253	0.131063	0.142076	0.155841	0.173049	0.194558
																						6.59727	6.59727	6.59727		8.18439e-06	8.18439e-06	5											7	3.8147	0.0920982	0.114652	0.120291	0.127339	0.136149	0.147162	0.160928	0.178135	0.199644
																						6.09772	6.09772	6.09774		1.283e-05	1.283e-05	5											8	4.76837	0.0984559	0.12101	0.126648	0.133697	0.142507	0.15352	0.167285	0.184493	0.206002
																						5.57048	5.57048	5.5705		1.67975e-05	1.67975e-05	5											9	5.96046	0.106403	0.128957	0.134596	0.141644	0.150454	0.161467	0.175233	0.19244	0.213949
																						5.02714	5.02714	5.02716		1.98807e-05	1.98807e-05	5											10	7.45058	0.116337	0.138891	0.14453	0.151578	0.160388	0.171401	0.185167	0.202374	0.223883
																						4.48082	4.48082	4.48084		2.19517e-05	2.19517e-05	5											11	9.31323	0.128754	0.151309	0.156947	0.163995	0.172805	0.183818	0.197584	0.214792	0.236301
																						3.94493	3.94493	3.94495		2.29807e-05	2.29807e-05	5											12	11.6415	0.144276	0.16683	0.172469	0.179517	0.188327	0.19934	0.213106	0.230313	0.251823
																						8.51903	8.51903	8.519		-2.37901e-05	-2.37901e-05	5											13	14.5519	0.163679	0.186233	0.191871	0.198919	0.20773	0.218742	0.232508	0.249716	0.271225
																						8.39977	8.39977	8.39974		-2.17127e-05	-2.17127e-05	5											14	18.1899	0.187931	0.210486	0.216124	0.223172	0.231983	0.242995	0.256761	0.273969	0.295478
																						8.2553	8.2553	8.25528		-1.92628e-05	-1.92628e-05	5											15	22.7374	0.218247	0.240802	0.24644	0.253488	0.262299	0.273311	0.287077	0.304285	0.325794
																						8.08156	8.08156	8.08155		-1.64126e-05	-1.64126e-05	5
																						7.87441	7.87441	7.8744		-1.31516e-05	-1.31516e-05	5
																						7.62994	7.62994	7.62993		-9.49548e-06	-9.49548e-06	5
																						7.3449	7.3449	7.34489		-5.4954e-06	-5.4954e-06	5
																						7.01721	7.01721	7.01721		-1.24643e-06	-1.24643e-06	5
																						6.64655	6.64655	6.64655		3.10908e-06	3.10908e-06	5
																						6.23487	6.23487	6.23488		7.38572e-06	7.38572e-06	5
																						5.78684	5.78684	5.78685		1.13694e-05	1.13694e-05	5
																						5.30989	5.30989	5.3099		1.48421e-05	1.48421e-05	5
																						4.81393	4.81393	4.81395		1.76129e-05	1.76129e-05	5
																						4.31065	4.31065	4.31067		1.95491e-05	1.95491e-05	5
																						3.81243	3.81243	3.81245		2.05969e-05	2.05969e-05	5
																						7.78834	7.78834	7.78833		-1.77678e-05	-1.77678e-05	5
																						7.68854	7.68854	7.68853		-1.62034e-05	-1.62034e-05	5
																						7.56733	7.56733	7.56732		-1.43501e-05	-1.43501e-05	5
																						7.42109	7.42109	7.42107		-1.21822e-05	-1.21822e-05	5
																						7.24604	7.24604	7.24603		-9.6853e-06	-9.6853e-06	5
																						7.03852	7.03852	7.03851		-6.86341e-06	-6.86341e-06	5
																						6.79525	6.79525	6.79524		-3.74653e-06	-3.74653e-06	5
																						6.51383	6.51383	6.51383		-3.98075e-07	-3.98075e-07	5
																						6.19322	6.19322	6.19323		3.08045e-06	3.08045e-06	5
																						5.83428	5.83428	5.83428		6.55006e-06	6.55006e-06	5
																						5.44015	5.44015	5.44016		9.84267e-06	9.84267e-06	5
																						5.01654	5.01654	5.01655		1.27781e-05	1.27781e-05	5
																						4.57157	4.57157	4.57159		1.51883e-05	1.51883e-05	5
																						4.11529	4.11529	4.11531		1.69435e-05	1.69435e-05	5
																						3.65881	3.65881	3.65883		1.79736e-05	1.79736e-05	5
																						7.03418	7.03418	7.03417		-1.23355e-05	-1.23355e-05	5
																						6.95267	6.95267	6.95266		-1.1218e-05	-1.1218e-05	5
																						6.8534	6.8534	6.85339		-9.88788e-06	-9.88788e-06	5
																						6.73323	6.73323	6.73322		-8.32306e-06	-8.32306e-06	5
																						6.58882	6.58882	6.58881		-6.50826e-06	-6.50826e-06	5
																						6.41678	6.41678	6.41678		-4.43999e-06	-4.43999e-06	5
																						6.21398	6.21398	6.21397		-2.13247e-06	-2.13247e-06	5
																						5.97781	5.97781	5.97781		3.76339e-07	3.76339e-07	5
																						5.7067	5.7067	5.7067		3.01984e-06	3.01984e-06	5
																						5.40054	5.40054	5.40054		5.70118e-06	5.70118e-06	5
																						5.06113	5.06113	5.06114		8.29691e-06	8.29691e-06	5
																						4.69249	4.69249	4.6925		1.06673e-05	1.06673e-05	5
																						4.30091	4.30091	4.30092		1.26733e-05	1.26733e-05	5
																						3.89465	3.89465	3.89467		1.41972e-05	1.41972e-05	5
																						3.48337	3.48337	3.48338		1.51616e-05	1.51616e-05	5
																						6.27469	6.27469	6.27469		-7.66919e-06	-7.66919e-06	5
																						6.20975	6.20975	6.20975		-6.92234e-06	-6.92234e-06	5
																						6.13044	6.13044	6.13044		-6.02917e-06	-6.02917e-06	5
																						6.03411	6.03411	6.03411		-4.97229e-06	-4.97229e-06	5
																						5.91787	5.91787	5.91787		-3.7379e-06	-3.7379e-06	5
																						5.77872	5.77872	5.77872		-2.31904e-06	-2.31904e-06	5
																						5.61372	5.61372	5.61372		-7.19688e-07	-7.19688e-07	5
																						5.42027	5.42027	5.42027		1.04072e-06	1.04072e-06	5
																						5.19642	5.19642	5.19643		2.92304e-06	2.92304e-06	5
																						4.94134	4.94134	4.94135		4.86584e-06	4.86584e-06	5
																						4.65567	4.65567	4.65568		6.78594e-06	6.78594e-06	5
																						4.3419	4.3419	4.34191		8.58358e-06	8.58358e-06	5
																						4.00454	4.00454	4.00455		1.01528e-05	1.01528e-05	5
																						3.65004	3.65004	3.65005		1.13958e-05	1.13958e-05	5
																						3.28638	3.28638	3.28639		1.22386e-05	1.22386e-05	5
																						5.52854	5.52854	5.52854		-3.87089e-06	-3.87089e-06	5
																						5.47806	5.47806	5.47806		-3.41593e-06	-3.41593e-06	5
																						5.41625	5.41625	5.41625		-2.86931e-06	-2.86931e-06	5
																						5.34092	5.34092	5.34092		-2.21882e-06	-2.21882e-06	5
																						5.24965	5.24965	5.24965		-1.45379e-06	-1.45379e-06	5
																						5.13986	5.13986	5.13986		-5.67013e-07	-5.67013e-07	5
																						5.00891	5.00891	5.00891		4.42792e-07	4.42792e-07	5
																						4.85432	4.85432	4.85432		1.56794e-06	1.56794e-06	5
																						4.674	4.674	4.67401		2.7887e-06	2.7887e-06	5
																						4.46661	4.46661	4.46661		4.07074e-06	4.07074e-06	5
																						4.23189	4.23189	4.23189		5.36423e-06	5.36423e-06	5
																						3.97104	3.97104	3.97105		6.60553e-06	6.60553e-06	5
																						3.68697	3.68697	3.68697		7.72244e-06	7.72244e-06	5
																						3.38434	3.38434	3.38435		8.64286e-06	8.64286e-06	5
																						3.06941	3.06941	3.06942		9.30554e-06	9.30554e-06	5
																						4.8131	4.8131	4.8131		-9.60595e-07	-9.60595e-07	5
																						4.7748	4.7748	4.7748		-7.23183e-07	-7.23183e-07	5
																						4.72777	4.72777	4.72777		-4.36722e-07	-4.36722e-07	5
																						4.67027	4.67027	4.67027		-9.4035e-08	-9.4035e-08	5
																						4.60033	4.60033	4.60033		3.1158e-07	3.1158e-07	5
																						4.5158	4.5158	4.5158		7.85425e-07	7.85425e-07	5
																						4.41441	4.41441	4.41441		1.33011e-06	1.33011e-06	5
																						4.2939	4.2939	4.2939		1.94391e-06	1.94391e-06	5
																						4.1522	4.1522	4.15221		2.61891e-06	2.61891e-06	5
																						3.98772	3.98772	3.98772		3.33923e-06	3.33923e-06	5
																						3.79957	3.79957	3.79957		4.07981e-06	4.07981e-06	5
																						3.58796	3.58796	3.58797		4.80645e-06	4.80645e-06	5
																						3.35444	3.35444	3.35445		5.47775e-06	5.47775e-06	5
																						3.10207	3.10207	3.10208		6.04919e-06	6.04919e-06	5
																						2.83542	2.83542	2.83542		6.47908e-06	6.47908e-06	5
																						4.14294	4.14294	4.14294		1.11581e-06	1.11581e-06	5
																						4.11453	4.11453	4.11453		1.20056e-06	1.20056e-06	5
																						4.07956	4.07956	4.07956		1.30313e-06	1.30313e-06	5
																						4.03668	4.03668	4.03668		1.42628e-06	1.42628e-06	5
																						3.98432	3.98432	3.98432		1.57267e-06	1.57267e-06	5
																						3.92076	3.92076	3.92076		1.74458e-06	1.74458e-06	5
																						3.8441	3.8441	3.8441		1.94342e-06	1.94342e-06	5
																						3.75239	3.75239	3.75239		2.16908e-06	2.16908e-06	5
																						3.64373	3.64373	3.64373		2.41924e-06	2.41924e-06	5
																						3.51644	3.51644	3.51645		2.68855e-06	2.68855e-06	5
																						3.36932	3.36932	3.36932		2.96791e-06	2.96791e-06	5
																						3.20187	3.20187	3.20187		3.24423e-06	3.24423e-06	5
																						3.01459	3.01459	3.01459		3.50076e-06	3.50076e-06	5
																						2.8092	2.8092	2.8092		3.71834e-06	3.71834e-06	5
																						2.58873	2.58873	2.58873		3.87768e-06	3.87768e-06	5
																						3.52877	3.52877	3.52878		2.46682e-06	2.46682e-06	5
																						3.50814	3.50814	3.50814		2.45171e-06	2.45171e-06	5
																						3.48269	3.48269	3.48269		2.43307e-06	2.43307e-06	5
																						3.45138	3.45138	3.45139		2.41018e-06	2.41018e-06	5
																						3.41304	3.41304	3.41304		2.38215e-06	2.38215e-06	5
																						3.36629	3.36629	3.36629		2.34803e-06	2.34803e-06	5
																						3.30962	3.30962	3.30962		2.30672e-06	2.30672e-06	5
																						3.24142	3.24142	3.24142		2.25707e-06	2.25707e-06	5
																						3.16001	3.16001	3.16002		2.19794e-06	2.19794e-06	5
																						3.06383	3.06383	3.06384		2.12824e-06	2.12824e-06	5
																						2.95154	2.95154	2.95154		2.04708e-06	2.04708e-06	5
																						2.82224	2.82224	2.82224		1.95393e-06	1.95393e-06	5
																						2.67572	2.67572	2.67573		1.84876e-06	1.84876e-06	5
																						2.51266	2.51266	2.51267		1.7322e-06	1.7322e-06	5
																						2.33481	2.33481	2.33481		1.60563e-06	1.60563e-06	5
																						2.9771	2.9771	2.9771		3.23034e-06	3.23034e-06	5
																						2.9624	2.9624	2.9624		3.15562e-06	3.15562e-06	5
																						2.94423	2.94423	2.94423		3.06406e-06	3.06406e-06	5
																						2.92183	2.92183	2.92183		2.9524e-06	2.9524e-06	5
																						2.8943	2.8943	2.8943		2.81705e-06	2.81705e-06	5
																						2.86061	2.86061	2.86061		2.65419e-06	2.65419e-06	5
																						2.81959	2.81959	2.81959		2.46001e-06	2.46001e-06	5
																						2.76993	2.76993	2.76993		2.23105e-06	2.23105e-06	5
																						2.71027	2.71027	2.71027		1.96475e-06	1.96475e-06	5
																						2.63921	2.63921	2.63921		1.66013e-06	1.66013e-06	5
																						2.55546	2.55546	2.55546		1.3186e-06	1.3186e-06	5
																						2.45796	2.45796	2.45796		9.44849e-07	9.44849e-07	5
																						2.34608	2.34608	2.34608		5.47563e-07	5.47563e-07	5
																						2.21977	2.21977	2.21977		1.39683e-07	1.39683e-07	5
																						2.07981	2.07981	2.07981		-2.62003e-07	-2.62003e-07	5
																						2.49042	2.49042	2.49043		3.55031e-06	3.55031e-06	5
																						2.48013	2.48013	2.48013		3.44484e-06	3.44484e-06	5
																						2.46738	2.46738	2.46738		3.31527e-06	3.31527e-06	5
																						2.45163	2.45163	2.45163		3.15676e-06	3.15676e-06	5
																						2.43222	2.43222	2.43222		2.96387e-06	2.96387e-06	5
																						2.40838	2.40838	2.40838		2.73068e-06	2.73068e-06	5
																						2.37924	2.37924	2.37924		2.45103e-06	2.45103e-06	5
																						2.34378	2.34378	2.34378		2.11899e-06	2.11899e-06	5
																						2.30092	2.30092	2.30092		1.72954e-06	1.72954e-06	5
																						2.2495	2.2495	2.24951		1.27955e-06	1.27955e-06	5
																						2.18838	2.18838	2.18838		7.69038e-07	7.69038e-07	5
																						2.11648	2.11648	2.11648		2.02647e-07	2.02647e-07	5
																						2.033	2.033	2.033		-4.08942e-07	-4.08942e-07	5
																						1.93747	1.93747	1.93747		-1.04795e-06	-1.04795e-06	5
																						1.82998	1.82998	1.82998		-1.68933e-06	-1.68933e-06	5
																						2.06787	2.06787	2.06787		3.55931e-06	3.55931e-06	5
																						2.06077	2.06077	2.06077		3.44251e-06	3.44251e-06	5
																						2.05196	2.05196	2.05196		3.29863e-06	3.29863e-06	5
																						2.04105	2.04105	2.04105		3.12204e-06	3.12204e-06	5
																						2.02758	2.02758	2.02758		2.90628e-06	2.90628e-06	5
																						2.01099	2.01099	2.01099		2.6441e-06	2.6441e-06	5
																						1.99063	1.99063	1.99063		2.32774e-06	2.32774e-06	5
																						1.96575	1.96575	1.96575		1.94922e-06	1.94922e-06	5
																						1.93551	1.93551	1.93551		1.50107e-06	1.50107e-06	5
																						1.899	1.899	1.899		9.77333e-07	9.77333e-07	5
																						1.85525	1.85525	1.85525		3.74893e-07	3.74893e-07	5
																						1.80332	1.80332	1.80332		-3.04714e-07	-3.04714e-07	5
																						1.74236	1.74236	1.74235		-1.05335e-06	-1.05335e-06	5
																						1.67171	1.67171	1.67171		-1.85443e-06	-1.85443e-06	5
																						1.59108	1.59108	1.59107		-2.68167e-06	-2.68167e-06	5
																						1.70604	1.70604	1.70604		3.36843e-06	3.36843e-06	5
																						1.7012	1.7012	1.7012		3.25249e-06	3.25249e-06	5
																						1.69519	1.69519	1.69519		3.10933e-06	3.10933e-06	5
																						1.68774	1.68774	1.68774		2.93309e-06	2.93309e-06	5
																						1.67852	1.67852	1.67852		2.71695e-06	2.71695e-06	5
																						1.66713	1.66713	1.66714		2.4531e-06	2.4531e-06	5
																						1.65312	1.65312	1.65312		2.13289e-06	2.13289e-06	5
																						1.63592	1.63592	1.63592		1.74705e-06	1.74705e-06	5
																						1.61493	1.61493	1.61493		1.28627e-06	1.28627e-06	5
																						1.58943	1.58943	1.58943		7.41986e-07	7.41986e-07	5
																						1.55866	1.55866	1.55866		1.07712e-07	1.07712e-07	5
																						1.52184	1.52184	1.52184		-6.19248e-07	-6.19248e-07	5
																						1.4782	1.4782	1.4782		-1.43563e-06	-1.43563e-06	5
																						1.42704	1.42704	1.42703		-2.32982e-06	-2.32982e-06	5
																						1.36786	1.36786	1.36786		-3.27971e-06	-3.27971e-06	5
[truncated: 54 more columns]
