# Supplementary material for: Comparing enzyme activity modifier equations through the development of global data fitting templates in Excel
Source: PeerJ. 2018 Dec 14;6:e6082. doi: 10.7717/peerj.6082 (PMC6296338; doi:10.7717/peerj.6082)
Supplement: Supplemental Information 28 [file peerj-06-6082-s028.xlsx]

## Sheet: Raw data and fitting summary
		No Inhibitor	[I]1	[I]2	[I]3	[I]4	[I]5	[I]6	[I]7	[I]8	[I]9	[I]10	[I]11	[I]12	[I]13	[I]14	[I]15
		0	0.0439805	0.0549756	0.0687195	0.0858993	0.107374	0.134218	0.167772	0.209715	0.262144	0.32768	0.4096	0.512	0.64	0.8	1
[S]1	1	13.6364	16.6997	17.2238	17.7926	18.3964	19.0224	19.6557	20.2806	20.8825	21.4487	21.9695	22.439	22.8545	23.2162	23.5267	23.79
[S]2	0.8	13.3333	16.2475	16.7432	17.2802	17.8492	18.4379	19.0322	19.6175	20.1802	20.7084	21.1935	21.6301	22.0159	22.3514	22.639	22.8827
[S]3	0.64	12.973	15.7156	16.1788	16.6797	17.2092	17.7558	18.3063	18.8473	19.366	19.8519	20.2973	20.6974	21.0504	21.3569	21.6194	21.8415
[S]4	0.512	12.549	15.0977	15.5247	15.9854	16.4711	16.9711	17.4733	17.9655	18.4362	18.8761	19.2783	19.6389	19.9564	20.2317	20.4671	20.666
[S]5	0.4096	12.0565	14.3904	14.7779	15.1947	15.6329	16.0826	16.533	16.9729	17.3924	17.7834	18.1399	18.4588	18.7391	18.9816	19.1886	19.3634
[S]6	0.32768	11.4927	13.5944	13.9397	14.3099	14.6979	15.0948	15.4908	15.8764	16.2429	16.5834	16.893	17.1693	17.4115	17.6206	17.7989	17.9492
[S]7	0.262144	10.858	12.7152	13.0168	13.3391	13.6756	14.0185	14.3595	14.6902	15.0034	15.2934	15.5564	15.7903	15.995	16.1713	16.3213	16.4476
[S]8	0.209715	10.1568	11.7642	12.0219	12.2963	12.5816	12.8713	13.1582	13.4353	13.6969	13.9382	14.1563	14.3497	14.5185	14.6637	14.7869	14.8905
[S]9	0.167772	9.39822	10.7584	10.9735	11.2016	11.438	11.6769	11.9125	12.1392	12.3523	12.5482	12.7247	12.8808	13.0166	13.1332	13.232	13.3148
[S]10	0.134218	8.5957	9.71958	9.89481	10.0799	10.2709	10.4632	10.6519	10.8328	11.0022	11.1574	11.2967	11.4196	11.5262	11.6175	11.6947	11.7594
[S]11	0.107374	7.7667	8.67282	8.81207	8.9586	9.10914	9.26003	9.40757	9.5484	9.67975	9.79965	9.90696	10.0013	10.083	10.1528	10.2118	10.261
[S]12	0.0858993	6.93112	7.64381	7.75177	7.86494	7.98072	8.09631	8.20887	8.31589	8.41535	8.50582	8.58655	8.65735	8.7185	8.77063	8.81458	8.85128
[S]13	0.0687195	6.1095	6.65658	6.7383	6.82365	6.91064	6.99713	7.08105	7.16054	7.23416	7.30092	7.36032	7.41227	7.45706	7.49516	7.52723	7.55398
[S]14	0.0549756	5.32106	5.7313	5.79178	5.85472	5.91864	5.98198	6.0432	6.10101	6.15437	6.20262	6.24544	6.28281	6.31495	6.34226	6.36521	6.38432
[S]15	0.0439805	4.58192	4.88288	4.92671	4.97218	5.01821	5.06367	5.10747	5.1487	5.18665	5.22088	5.25118	5.27757	5.30024	5.31946	5.33559	5.34902
		Direct linear plot Km, Vmax estimates
							-0.833666	1	13.6364	1	1	1	13.6364	1	13.6364
		Km	0.1				-0.870771	0.8	13.3333	1	1	0.8	13.3333	0.8	13.3333
		Vmax	15					0.64	12.973	1	1	0.64	12.973	0.64	12.973
								0.512	12.549	1	1	0.512	12.549	0.512	12.549
	Ki estimate based on linear decrease in activity							0.4096	12.0565	1	1	0.4096	12.0565	0.4096	12.0565
								0.32768	11.4927	1	1	0.32768	11.4927	0.32768	11.4927
		Ki	-0.833666					0.262144	10.858	1	1	0.262144	10.858	0.262144	10.858
								0.209715	10.1568	1	1	0.209715	10.1568	0.209715	10.1568
								0.167772	9.39822	1	1	0.167772	9.39822	0.167772	9.39822
								0.134218	8.5957	1	1	0.134218	8.5957	0.134218	8.5957
								0.107374	7.7667	1	1	0.107374	7.7667	0.107374	7.7667
								0.0858993	6.93112	1	1	0.0858993	6.93112	0.0858993	6.93112
								0.0687195	6.1095	1	1	0.0687195	6.1095	0.0687195	6.1095
								0.0549756	5.32106	1	1	0.0549756	5.32106	0.0549756	5.32106
								0.0439805	4.58192	1	1	0.0439805	4.58192	0.0439805	4.58192
			Km	Km2	Vmax	Vmax2	Ki	b	RSS	RSE	n	k	BIC
		Partial Non-competitive	0.15696		23.3262	7.5	4.47571e+07		629.34	1.633	240	4	110.003
		Partial Competitive	0.156996	1466.24	23.3221		31665		629.365	1.63303	240	4	110.007
		Partial Uncompetitive	0.132514		14.2334	28.1905	1.57591		287.72	1.10415	240	4	28.423
		Partial Mixed Non-competitive	0.0999968	0.199994	14.9995		0.129981	2.00004	1.81446e-06	8.78699e-05	240	5	-1937.25
		Modifier equation	0.1	0.2	15	30	0.13		6.94198e-28	1.71873e-15	240	5	-7077.39
													Residual distribution
													Partial Non-competitive	Partial Competitive	Partial Uncompetitive	Partial Mixed Non-competitive	Modifier equation
												Minimum value	-3.62837	-3.6327	-1.44503	-0.000458635	0
												First quartile	-0.818691	-0.822404	-0.824515	-3.26766e-05	0
												Median value	-0.115254	-0.118296	-0.474202	1.29731e-05	0
					Partial Non-competitive	Partial Competitive	Partial Uncompetitive	Partial Mixed Non-competitive	Modifier equation			Third quartile	0.625893	0.622508	0.485692	3.50331e-05	0
				Q1	-0.818691	-0.822404	-0.824515	-3.26766e-05	0			Maximum value	6.52528	6.52105	4.91914	4.50528e-05	0
				Min	-3.62837	-3.6327	-1.44503	-0.000458635	0
				Median	-0.115254	-0.118296	-0.474202	1.29731e-05	0
				Max	6.52528	6.52105	4.91914	4.50528e-05	0
				Q3	0.625893	0.622508	0.485692	3.50331e-05	0
	Partial Non-competitive
	Km	0.15696
	Vmax	23.3262
	bVmax	7.5
	Ki	4.47571e+07
	RSS	629.34
	Partial Competitive
	Km	0.156996
	Km2	1466.24
	Vmax	23.3221
	Ki	31665
	RSS	629.365
	Partial Uncompetitive
	Km	0.132514
	Vmax	14.2334
	Vmax2	28.1905
	Ki	1.57591
	RSS	287.72
	Partial Mixed Non-competitive
	Km	0.0999968
	Km2	0.199994
	Vmax	14.9995
	Ki	0.129981
	b	2.00004
	RSS	1.81446e-06
	Modifier equation
	Km	0.1
	Km2	0.2
	Vmax	15
	Vmax2	30
	Kx	0.13
	RSS	6.94198e-28

## Sheet: modified direct linear plot
Km/Vmax direct plot
									Intercept points x-axis																				Intercept points x-axis
										Line 1	Line 2	Line 3	Line 4	Line 5	Line 6	Line 7	Line 8	Line 9	Line 10	Line 11	Line 12	Line 13	Line 14	Line 15						Line 1	Line 2	Line 3	Line 4	Line 5	Line 6	Line 7	Line 8	Line 9	Line 10	Line 11	Line 12	Line 13	Line 14	Line 15
			x-intercept	y-interecept					Line 1																				Line 1
[Substrate]		v	[Substrate]/v	1/v					Line 2	0.00666667																			Line 2	0.00666667
1		13.6364	0.0733333	0.0733333					Line 3	0.00666667	0.00666667																		Line 3	0.00666667	0.00666667
0.8		13.3333	0.06	0.075					Line 4	0.00666667	0.00666667	0.00666667																	Line 4	0.00666667	0.00666667	0.00666667
0.64		12.973	0.0493333	0.0770833					Line 5	0.00666667	0.00666667	0.00666667	0.00666667																Line 5	0.00666667	0.00666667	0.00666667	0.00666667
0.512		12.549	0.0408	0.0796875					Line 6	0.00666667	0.00666667	0.00666667	0.00666667	0.00666667															Line 6	0.00666667	0.00666667	0.00666667	0.00666667	0.00666667
0.4096		12.0565	0.0339733	0.0829427					Line 7	0.00666667	0.00666667	0.00666667	0.00666667	0.00666667	0.00666667														Line 7	0.00666667	0.00666667	0.00666667	0.00666667	0.00666667	0.00666667
0.32768		11.4927	0.028512	0.0870117					Line 8	0.00666667	0.00666667	0.00666667	0.00666667	0.00666667	0.00666667	0.00666667													Line 8	0.00666667	0.00666667	0.00666667	0.00666667	0.00666667	0.00666667	0.00666667
0.262144		10.858	0.0241429	0.092098					Line 9	0.00666667	0.00666667	0.00666667	0.00666667	0.00666667	0.00666667	0.00666667	0.00666667												Line 9	0.00666667	0.00666667	0.00666667	0.00666667	0.00666667	0.00666667	0.00666667	0.00666667
0.209715		10.1568	0.0206477	0.0984558					Line 10	0.00666667	0.00666667	0.00666667	0.00666667	0.00666667	0.00666667	0.00666667	0.00666667	0.00666667											Line 10	0.00666667	0.00666667	0.00666667	0.00666667	0.00666667	0.00666667	0.00666667	0.00666667	0.00666667
0.167772		9.39822	0.0178515	0.106403					Line 11	0.00666667	0.00666667	0.00666667	0.00666667	0.00666667	0.00666667	0.00666667	0.00666667	0.00666667	0.00666667										Line 11	0.00666667	0.00666667	0.00666667	0.00666667	0.00666667	0.00666667	0.00666667	0.00666667	0.00666667	0.00666667
0.134218		8.5957	0.0156145	0.116337					Line 12	0.00666667	0.00666667	0.00666667	0.00666667	0.00666667	0.00666667	0.00666667	0.00666667	0.00666667	0.00666667	0.00666667									Line 12	0.00666667	0.00666667	0.00666667	0.00666667	0.00666667	0.00666667	0.00666667	0.00666667	0.00666667	0.00666667	0.00666667
0.107374		7.7667	0.0138249	0.128755					Line 13	0.00666667	0.00666667	0.00666667	0.00666667	0.00666667	0.00666667	0.00666667	0.00666667	0.00666667	0.00666667	0.00666667	0.00666667								Line 13	0.00666667	0.00666667	0.00666667	0.00666667	0.00666667	0.00666667	0.00666667	0.00666667	0.00666667	0.00666667	0.00666667	0.00666667
0.0858993		6.93112	0.0123933	0.144277					Line 14	0.00666667	0.00666667	0.00666667	0.00666667	0.00666667	0.00666667	0.00666667	0.00666667	0.00666667	0.00666667	0.00666667	0.00666667	0.00666667							Line 14	0.00666667	0.00666667	0.00666667	0.00666667	0.00666667	0.00666667	0.00666667	0.00666667	0.00666667	0.00666667	0.00666667	0.00666667	0.00666667
0.0687195		6.1095	0.011248	0.163679					Line 15	0.00666667	0.00666667	0.00666667	0.00666667	0.00666667	0.00666667	0.00666667	0.00666667	0.00666667	0.00666667	0.00666667	0.00666667	0.00666667	0.00666667						Line 15	0.00666667	0.00666667	0.00666667	0.00666667	0.00666667	0.00666667	0.00666667	0.00666667	0.00666667	0.00666667	0.00666667	0.00666667	0.00666667	0.00666667
0.0549756		5.32106	0.0103317	0.187933
0.0439805		4.58192	0.0095987	0.218249
																														Km/Vmax (x-axis):	0.00666667		Km:	0.1
																														Standard dev:	1.6544e-17
Line 1	x	y
	0	0.0733333		Slope:	-1
	0.0733333	0		y-intercept:	0.0733333				1/Intercept points y-axis																				1/Intercept points y-axis
										Line 1	Line 2	Line 3	Line 4	Line 5	Line 6	Line 7	Line 8	Line 9	Line 10	Line 11	Line 12	Line 13	Line 14	Line 15						Line 1	Line 2	Line 3	Line 4	Line 5	Line 6	Line 7	Line 8	Line 9	Line 10	Line 11	Line 12	Line 13	Line 14	Line 15
Line 2	x	y							Line 1																				Line 1
	0	0.075		Slope:	-1.25				Line 2	15																			Line 2	15
	0.06	0		y-intercept:	0.075				Line 3	15	15																		Line 3	15	15
									Line 4	15	15	15																	Line 4	15	15	15
Line 3	x	y							Line 5	15	15	15	15																Line 5	15	15	15	15
	0	0.0770833		Slope:	-1.5625				Line 6	15	15	15	15	15															Line 6	15	15	15	15	15
	0.0493333	0		y-intercept:	0.0770833				Line 7	15	15	15	15	15	15														Line 7	15	15	15	15	15	15
									Line 8	15	15	15	15	15	15	15													Line 8	15	15	15	15	15	15	15
Line 4	x	y							Line 9	15	15	15	15	15	15	15	15												Line 9	15	15	15	15	15	15	15	15
	0	0.0796875		Slope:	-1.95312				Line 10	15	15	15	15	15	15	15	15	15											Line 10	15	15	15	15	15	15	15	15	15
	0.0408	0		y-intercept:	0.0796875				Line 11	15	15	15	15	15	15	15	15	15	15										Line 11	15	15	15	15	15	15	15	15	15	15
									Line 12	15	15	15	15	15	15	15	15	15	15	15									Line 12	15	15	15	15	15	15	15	15	15	15	15
Line 5	x	y							Line 13	15	15	15	15	15	15	15	15	15	15	15	15								Line 13	15	15	15	15	15	15	15	15	15	15	15	15
	0	0.0829427		Slope:	-2.44141				Line 14	15	15	15	15	15	15	15	15	15	15	15	15	15							Line 14	15	15	15	15	15	15	15	15	15	15	15	15	15
	0.0339733	0		y-intercept:	0.0829427				Line 15	15	15	15	15	15	15	15	15	15	15	15	15	15	15						Line 15	15	15	15	15	15	15	15	15	15	15	15	15	15	15
Line 6	x	y
	0	0.0870117		Slope:	-3.05176
	0.028512	0		y-intercept:	0.0870117
Line 7	x	y																												Vmax:	15
	0	0.092098		Slope:	-3.8147																									Standard dev:	1.10385e-14
	0.0241429	0		y-intercept:	0.092098
Line 8	x	y
	0	0.0984558		Slope:	-4.76837
	0.0206477	0		y-intercept:	0.0984558
Line 9	x	y
	0	0.106403		Slope:	-5.96046
	0.0178515	0		y-intercept:	0.106403
Line 10	x	y
	0	0.116337		Slope:	-7.45058
	0.0156145	0		y-intercept:	0.116337
Line 11	x	y										0	0.0733333	0.075	0.0770833	0.0796875	0.0829427	0.0870117	0.092098	0.0984558	0.106403	0.116337	0.128755	0.144277	0.163679	0.187933	0.218249	0	0	0	0
	0	0.128755		Slope:	-9.31323							0.0733333	0
	0.0138249	0		y-intercept:	0.128755							0.06		0
												0.0493333			0
Line 12	x	y										0.0408				0
	0	0.144277		Slope:	-11.6415							0.0339733					0
	0.0123933	0		y-intercept:	0.144277							0.028512						0
												0.0241429							0
Line 13	x	y										0.0206477								0
	0	0.163679		Slope:	-14.5519							0.0178515									0
	0.011248	0		y-intercept:	0.163679							0.0156145										0
												0.0138249											0
Line 14	x	y										0.0123933												0
	0	0.187933		Slope:	-18.1899							0.011248													0
	0.0103317	0		y-intercept:	0.187933							0.0103317														0
												0.0095987															0
Line 15	x	y										0																0
	0	0.218249		Slope:	-22.7374							0																	0
	0.0095987	0		y-intercept:	0.218249							0																		0
												0																			0

## Sheet: Part Non-competitive
														(V_max*([S]/K_s )+bV_max*(([S]*[I])/(K_s*K_i )))/((1+([S]/K_s )+([I]/K_i )+(([S]*[I])/(K_s*K_i ))) )									Calculated values
		No Inhibitor	[I]1	[I]2	[I]3	[I]4	[I]5	[I]6	[I]7	[I]8	[I]9	[I]10	[I]11	[I]12	[I]13	[I]14	[I]15						No Inhibitor	[I]1	[I]2	[I]3	[I]4	[I]5	[I]6	[I]7	[I]8	[I]9	[I]10	[I]11	[I]12	[I]13	[I]14	[I]15
		0	0.0439805	0.0549756	0.0687195	0.0858993	0.107374	0.134218	0.167772	0.209715	0.262144	0.32768	0.4096	0.512	0.64	0.8	1	Km	Vmax	bVmax	Ki		0	0.0439805	0.0549756	0.0687195	0.0858993	0.107374	0.134218	0.167772	0.209715	0.262144	0.32768	0.4096	0.512	0.64	0.8	1
[S]1	1	13.6364	16.6997	17.2238	17.7926	18.3964	19.0224	19.6557	20.2806	20.8825	21.4487	21.9695	22.439	22.8545	23.2162	23.5267	23.79	0.15696	23.3262	7.5	4.47571e+07		20.1616	20.1616	20.1616	20.1616	20.1616	20.1616	20.1616	20.1616	20.1616	20.1616	20.1616	20.1616	20.1616	20.1616	20.1616	20.1616		20.1616	20.1616	20.1616	20.1616	20.1616	20.1616	20.1616	20.1616	20.1616	20.1616
[S]2	0.8	13.3333	16.2475	16.7432	17.2802	17.8492	18.4379	19.0322	19.6175	20.1802	20.7084	21.1935	21.6301	22.0159	22.3514	22.639	22.8827						19.5003	19.5003	19.5003	19.5003	19.5003	19.5003	19.5003	19.5003	19.5003	19.5003	19.5003	19.5003	19.5003	19.5003	19.5003	19.5003		19.5003	19.5003	19.5003	19.5003	19.5003	19.5003	19.5003	19.5003	19.5003	19.5003
[S]3	0.64	12.973	15.7156	16.1788	16.6797	17.2092	17.7558	18.3063	18.8473	19.366	19.8519	20.2973	20.6974	21.0504	21.3569	21.6194	21.8415						18.7322	18.7322	18.7322	18.7322	18.7322	18.7322	18.7322	18.7322	18.7322	18.7322	18.7322	18.7322	18.7322	18.7322	18.7322	18.7322		18.7322	18.7322	18.7322	18.7322	18.7322	18.7322	18.7322	18.7322	18.7322	18.7322
[S]4	0.512	12.549	15.0977	15.5247	15.9854	16.4711	16.9711	17.4733	17.9655	18.4362	18.8761	19.2783	19.6389	19.9564	20.2317	20.4671	20.666						17.8531	17.8531	17.8531	17.8531	17.8531	17.8531	17.8531	17.8531	17.8531	17.8531	17.8531	17.8531	17.8531	17.8531	17.8531	17.8531		17.8531	17.8531	17.8531	17.8531	17.8531	17.8531	17.8531	17.8531	17.8531	17.8531
[S]5	0.4096	12.0565	14.3904	14.7779	15.1947	15.6329	16.0826	16.533	16.9729	17.3924	17.7834	18.1399	18.4588	18.7391	18.9816	19.1886	19.3634						16.8639	16.8639	16.8639	16.8639	16.8639	16.8639	16.8639	16.8639	16.8639	16.8639	16.8639	16.8639	16.8639	16.8639	16.8639	16.8639		16.8639	16.8639	16.8639	16.8639	16.8639	16.8639	16.8639	16.8639	16.8639	16.8639
[S]6	0.32768	11.4927	13.5944	13.9397	14.3099	14.6979	15.0948	15.4908	15.8764	16.2429	16.5834	16.893	17.1693	17.4115	17.6206	17.7989	17.9492			Sum R2	629.34		15.7716	15.7716	15.7716	15.7716	15.7716	15.7716	15.7716	15.7716	15.7716	15.7716	15.7716	15.7716	15.7716	15.7716	15.7716	15.7716		15.7716	15.7716	15.7716	15.7716	15.7716	15.7716	15.7716	15.7716	15.7716	15.7716
[S]7	0.262144	10.858	12.7152	13.0168	13.3391	13.6756	14.0185	14.3595	14.6902	15.0034	15.2934	15.5564	15.7903	15.995	16.1713	16.3213	16.4476			Sum residuals %	18.5239		14.5902	14.5902	14.5902	14.5902	14.5902	14.5902	14.5902	14.5902	14.5902	14.5902	14.5902	14.5902	14.5902	14.5902	14.5902	14.5902		14.5902	14.5902	14.5902	14.5902	14.5902	14.5902	14.5902	14.5902	14.5902	14.5902
[S]8	0.209715	10.1568	11.7642	12.0219	12.2963	12.5816	12.8713	13.1582	13.4353	13.6969	13.9382	14.1563	14.3497	14.5185	14.6637	14.7869	14.8905						13.3411	13.3411	13.3411	13.3411	13.3411	13.3411	13.3411	13.3411	13.3411	13.3411	13.3411	13.3411	13.3411	13.3411	13.3411	13.3411		13.3411	13.3411	13.3411	13.3411	13.3411	13.3411	13.3411	13.3411	13.3411	13.3411
[S]9	0.167772	9.39822	10.7584	10.9735	11.2016	11.438	11.6769	11.9125	12.1392	12.3523	12.5482	12.7247	12.8808	13.0166	13.1332	13.232	13.3148						12.0514	12.0514	12.0514	12.0514	12.0514	12.0514	12.0514	12.0514	12.0514	12.0514	12.0514	12.0514	12.0514	12.0514	12.0514	12.0514		12.0514	12.0514	12.0514	12.0514	12.0514	12.0514	12.0514	12.0514	12.0514	12.0514
[S]10	0.134218	8.5957	9.71958	9.89481	10.0799	10.2709	10.4632	10.6519	10.8328	11.0022	11.1574	11.2967	11.4196	11.5262	11.6175	11.6947	11.7594						10.7522	10.7522	10.7522	10.7522	10.7522	10.7522	10.7522	10.7522	10.7522	10.7522	10.7522	10.7522	10.7522	10.7522	10.7522	10.7522		10.7522	10.7522	10.7522	10.7522	10.7522	10.7522	10.7522	10.7522	10.7522	10.7522
[S]11	0.107374	7.7667	8.67282	8.81207	8.9586	9.10914	9.26003	9.40757	9.5484	9.67975	9.79965	9.90696	10.0013	10.083	10.1528	10.2118	10.261						9.47525	9.47525	9.47525	9.47525	9.47525	9.47525	9.47525	9.47525	9.47525	9.47525	9.47525	9.47525	9.47525	9.47525	9.47525	9.47525		9.47525	9.47525	9.47525	9.47525	9.47525	9.47525	9.47525	9.47525	9.47525	9.47525
[S]12	0.0858993	6.93112	7.64381	7.75177	7.86494	7.98072	8.09631	8.20887	8.31589	8.41535	8.50582	8.58655	8.65735	8.7185	8.77063	8.81458	8.85128						8.25047	8.25047	8.25047	8.25047	8.25047	8.25047	8.25047	8.25047	8.25047	8.25047	8.25047	8.25047	8.25047	8.25047	8.25047	8.25047		8.25047	8.25047	8.25047	8.25047	8.25047	8.25047	8.25047	8.25047	8.25047	8.25047
[S]13	0.0687195	6.1095	6.65658	6.7383	6.82365	6.91064	6.99713	7.08105	7.16054	7.23416	7.30092	7.36032	7.41227	7.45706	7.49516	7.52723	7.55398						7.10283	7.10283	7.10283	7.10283	7.10283	7.10283	7.10283	7.10283	7.10283	7.10283	7.10283	7.10283	7.10283	7.10283	7.10283	7.10283		7.10283	7.10283	7.10283	7.10283	7.10283	7.10283	7.10283	7.10283	7.10283	7.10283
[S]14	0.0549756	5.32106	5.7313	5.79178	5.85472	5.91864	5.98198	6.0432	6.10101	6.15437	6.20262	6.24544	6.28281	6.31495	6.34226	6.36521	6.38432						6.05076	6.05076	6.05076	6.05076	6.05076	6.05076	6.05076	6.05076	6.05076	6.05076	6.05076	6.05076	6.05076	6.05076	6.05076	6.05076		6.05076	6.05076	6.05076	6.05076	6.05076	6.05076	6.05076	6.05076	6.05076	6.05076
[S]15	0.0439805	4.58192	4.88288	4.92671	4.97218	5.01821	5.06367	5.10747	5.1487	5.18665	5.22088	5.25118	5.27757	5.30024	5.31946	5.33559	5.34902						5.10548	5.10548	5.10548	5.10548	5.10548	5.10548	5.10548	5.10548	5.10548	5.10548	5.10548	5.10548	5.10548	5.10548	5.10548	5.10548		5.10548	5.10548	5.10548	5.10548	5.10548	5.10548	5.10548	5.10548	5.10548	5.10548
	1	1	1	1	1	1	1	1	1	1	1	1	1	1	1	1	1																					1	1	20.1616	20.1616	20.1616	20.1616	20.1616	20.1616	20.1616	20.1616	20.1616	20.1616
	1	1	1	1	1	1	1	1	1	1	1	1	1	1	1	1	1					13.6364	13.6364	20.1616		6.52528	6.52528	1										0.8	0.8	19.5003	19.5003	19.5003	19.5003	19.5003	19.5003	19.5003	19.5003	19.5003	19.5003
	1	1	1	1	1	1	1	1	1	1	1	1	1	1	1	1	1					13.3333	13.3333	19.5003		6.16693	6.16693	1										0.64	0.64	18.7322	18.7322	18.7322	18.7322	18.7322	18.7322	18.7322	18.7322	18.7322	18.7322
	1	1	1	1	1	1	1	1	1	1	1	1	1	1	1	1	1					12.973	12.973	18.7322		5.75918	5.75918	1										0.512	0.512	17.8531	17.8531	17.8531	17.8531	17.8531	17.8531	17.8531	17.8531	17.8531	17.8531
	1	1	1	1	1	1	1	1	1	1	1	1	1	1	1	1	1					12.549	12.549	17.8531		5.3041	5.3041	1										0.4096	0.4096	16.8639	16.8639	16.8639	16.8639	16.8639	16.8639	16.8639	16.8639	16.8639	16.8639
	1	1	1	1	1	1	1	1	1	1	1	1	1	1	1	1	1					12.0565	12.0565	16.8639		4.8074	4.8074	1										0.32768	0.32768	15.7716	15.7716	15.7716	15.7716	15.7716	15.7716	15.7716	15.7716	15.7716	15.7716
	1	1	1	1	1	1	1	1	1	1	1	1	1	1	1	1	1					11.4927	11.4927	15.7716		4.27886	4.27886	1										0.262144	0.262144	14.5902	14.5902	14.5902	14.5902	14.5902	14.5902	14.5902	14.5902	14.5902	14.5902
	1	1	1	1	1	1	1	1	1	1	1	1	1	1	1	1	1					10.858	10.858	14.5902		3.73223	3.73223	1										0.209715	0.209715	13.3411	13.3411	13.3411	13.3411	13.3411	13.3411	13.3411	13.3411	13.3411	13.3411
	1	1	1	1	1	1	1	1	1	1	1	1	1	1	1	1	1					10.1568	10.1568	13.3411		3.18428	3.18428	1										0.167772	0.167772	12.0514	12.0514	12.0514	12.0514	12.0514	12.0514	12.0514	12.0514	12.0514	12.0514
	1	1	1	1	1	1	1	1	1	1	1	1	1	1	1	1	1					9.39822	9.39822	12.0514		2.65321	2.65321	1										0.134218	0.134218	10.7522	10.7522	10.7522	10.7522	10.7522	10.7522	10.7522	10.7522	10.7522	10.7522
	1	1	1	1	1	1	1	1	1	1	1	1	1	1	1	1	1					8.5957	8.5957	10.7522		2.15646	2.15646	1										0.107374	0.107374	9.47525	9.47525	9.47525	9.47525	9.47525	9.47525	9.47525	9.47525	9.47525	9.47525
	1	1	1	1	1	1	1	1	1	1	1	1	1	1	1	1	1					7.7667	7.7667	9.47525		1.70855	1.70855	1										0.0858993	0.0858993	8.25047	8.25047	8.25047	8.25047	8.25047	8.25047	8.25047	8.25047	8.25047	8.25047
	1	1	1	1	1	1	1	1	1	1	1	1	1	1	1	1	1					6.93112	6.93112	8.25047		1.31936	1.31936	1										0.0687195	0.0687195	7.10283	7.10283	7.10283	7.10283	7.10283	7.10283	7.10283	7.10283	7.10283	7.10283
	1	1	1	1	1	1	1	1	1	1	1	1	1	1	1	1	1					6.1095	6.1095	7.10283		0.993331	0.993331	1										0.0549756	0.0549756	6.05076	6.05076	6.05076	6.05076	6.05076	6.05076	6.05076	6.05076	6.05076	6.05076
	1	1	1	1	1	1	1	1	1	1	1	1	1	1	1	1	1					5.32106	5.32106	6.05076		0.729702	0.729702	1										0.0439805	0.0439805	5.10548	5.10548	5.10548	5.10548	5.10548	5.10548	5.10548	5.10548	5.10548	5.10548
																						4.58192	4.58192	5.10548		0.523556	0.523556	1
		1	1	1	1	1	1	1	1	1	1	1	1	1	1	1	1					16.6997	16.6997	20.1616		3.46193	3.46193	1											1	0.0495991	0.0495991	0.0495991	0.0495991	0.0495991	0.0495991	0.0495991	0.0495991	0.0495991	0.0495991
		1	1	1	1	1	1	1	1	1	1	1	1	1	1	1	1					16.2475	16.2475	19.5003		3.25276	3.25276	1											1.25	0.0512814	0.0512814	0.0512814	0.0512814	0.0512814	0.0512814	0.0512814	0.0512814	0.0512814	0.0512814
		1	1	1	1	1	1	1	1	1	1	1	1	1	1	1	1					15.7156	15.7156	18.7322		3.0166	3.0166	1											1.5625	0.0533841	0.0533841	0.0533841	0.0533841	0.0533841	0.0533841	0.0533841	0.0533841	0.0533841	0.0533841
		1	1	1	1	1	1	1	1	1	1	1	1	1	1	1	1					15.0977	15.0977	17.8531		2.75545	2.75545	1											1.95312	0.0560126	0.0560126	0.0560126	0.0560126	0.0560126	0.0560126	0.0560126	0.0560126	0.0560126	0.0560126
		1	1	1	1	1	1	1	1	1	1	1	1	1	1	1	1					14.3904	14.3904	16.8639		2.47348	2.47348	1											2.44141	0.0592982	0.0592982	0.0592982	0.0592982	0.0592982	0.0592982	0.0592982	0.0592982	0.0592982	0.0592982
		1	1	1	1	1	1	1	1	1	1	1	1	1	1	1	1					13.5944	13.5944	15.7716		2.17715	2.17715	1											3.05176	0.0634052	0.0634052	0.0634052	0.0634052	0.0634052	0.0634052	0.0634052	0.0634052	0.0634052	0.0634052
		1	1	1	1	1	1	1	1	1	1	1	1	1	1	1	1					12.7152	12.7152	14.5902		1.87501	1.87501	1											3.8147	0.068539	0.068539	0.068539	0.068539	0.068539	0.068539	0.068539	0.068539	0.068539	0.068539
		1	1	1	1	1	1	1	1	1	1	1	1	1	1	1	1					11.7642	11.7642	13.3411		1.57693	1.57693	1											4.76837	0.0749562	0.0749562	0.0749562	0.0749562	0.0749562	0.0749562	0.0749562	0.0749562	0.0749562	0.0749562
		1	1	1	1	1	1	1	1	1	1	1	1	1	1	1	1					10.7584	10.7584	12.0514		1.29308	1.29308	1											5.96046	0.0829777	0.0829777	0.0829777	0.0829777	0.0829777	0.0829777	0.0829777	0.0829777	0.0829777	0.0829777
		1	1	1	1	1	1	1	1	1	1	1	1	1	1	1	1					9.71958	9.71958	10.7522		1.03258	1.03258	1											7.45058	0.0930046	0.0930046	0.0930046	0.0930046	0.0930046	0.0930046	0.0930046	0.0930046	0.0930046	0.0930046
		1	1	1	1	1	1	1	1	1	1	1	1	1	1	1	1					8.67282	8.67282	9.47525		0.802426	0.802426	1											9.31323	0.105538	0.105538	0.105538	0.105538	0.105538	0.105538	0.105538	0.105538	0.105538	0.105538
		1	1	1	1	1	1	1	1	1	1	1	1	1	1	1	1					7.64381	7.64381	8.25047		0.606664	0.606664	1											11.6415	0.121205	0.121205	0.121205	0.121205	0.121205	0.121205	0.121205	0.121205	0.121205	0.121205
		1	1	1	1	1	1	1	1	1	1	1	1	1	1	1	1					6.65658	6.65658	7.10283		0.446256	0.446256	1											14.5519	0.140789	0.140789	0.140789	0.140789	0.140789	0.140789	0.140789	0.140789	0.140789	0.140789
		1	1	1	1	1	1	1	1	1	1	1	1	1	1	1	1					5.7313	5.7313	6.05076		0.31946	0.31946	1											18.1899	0.165269	0.165269	0.165269	0.165269	0.165269	0.165269	0.165269	0.165269	0.165269	0.165269
		1	1	1	1	1	1	1	1	1	1	1	1	1	1	1	1					4.88288	4.88288	5.10548		0.222592	0.222592	1											22.7374	0.195868	0.195868	0.195868	0.195868	0.195868	0.195868	0.195868	0.195868	0.195868	0.195868
																						17.2238	17.2238	20.1616		2.93786	2.93786	1
n	240																					16.7432	16.7432	19.5003		2.75711	2.75711	1												13.6364	16.6997	17.2238	17.7926	18.3964	19.0224	19.6557	20.2806	20.8825	21.4487
																						16.1788	16.1788	18.7322		2.55334	2.55334	1												13.3333	16.2475	16.7432	17.2802	17.8492	18.4379	19.0322	19.6175	20.1802	20.7084
																						15.5247	15.5247	17.8531		2.3284	2.3284	1												12.973	15.7156	16.1788	16.6797	17.2092	17.7558	18.3063	18.8473	19.366	19.8519
																						14.7779	14.7779	16.8639		2.08601	2.08601	1												12.549	15.0977	15.5247	15.9854	16.4711	16.9711	17.4733	17.9655	18.4362	18.8761
																						13.9397	13.9397	15.7716		1.83188	1.83188	1												12.0565	14.3904	14.7779	15.1947	15.6329	16.0826	16.533	16.9729	17.3924	17.7834
																						13.0168	13.0168	14.5902		1.57345	1.57345	1												11.4927	13.5944	13.9397	14.3099	14.6979	15.0948	15.4908	15.8764	16.2429	16.5834
																						12.0219	12.0219	13.3411		1.31925	1.31925	1												10.858	12.7152	13.0168	13.3391	13.6756	14.0185	14.3595	14.6902	15.0034	15.2934
																						10.9735	10.9735	12.0514		1.07798	1.07798	1												10.1568	11.7642	12.0219	12.2963	12.5816	12.8713	13.1582	13.4353	13.6969	13.9382
																						9.89481	9.89481	10.7522		0.857352	0.857352	1												9.39822	10.7584	10.9735	11.2016	11.438	11.6769	11.9125	12.1392	12.3523	12.5482
																						8.81207	8.81207	9.47525		0.663178	0.663178	1												8.5957	9.71958	9.89481	10.0799	10.2709	10.4632	10.6519	10.8328	11.0022	11.1574
																						7.75177	7.75177	8.25047		0.498704	0.498704	1												7.7667	8.67282	8.81207	8.9586	9.10914	9.26003	9.40757	9.5484	9.67975	9.79965
																						6.7383	6.7383	7.10283		0.364531	0.364531	1												6.93112	7.64381	7.75177	7.86494	7.98072	8.09631	8.20887	8.31589	8.41535	8.50582
																						5.79178	5.79178	6.05076		0.258979	0.258979	1												6.1095	6.65658	6.7383	6.82365	6.91064	6.99713	7.08105	7.16054	7.23416	7.30092
																						4.92671	4.92671	5.10548		0.178761	0.178761	1												5.32106	5.7313	5.79178	5.85472	5.91864	5.98198	6.0432	6.10101	6.15437	6.20262
																						17.7926	17.7926	20.1616		2.36903	2.36903	1												4.58192	4.88288	4.92671	4.97218	5.01821	5.06367	5.10747	5.1487	5.18665	5.22088
																						17.2802	17.2802	19.5003		2.22008	2.22008	1
																						16.6797	16.6797	18.7322		2.05244	2.05244	1												1/s	0	0.0439805	0.0549756	0.0687195	0.0858993	0.107374	0.134218	0.167772	0.209715
																						15.9854	15.9854	17.8531		1.86776	1.86776	1											1	1	0.0495991	0.0495991	0.0495991	0.0495991	0.0495991	0.0495991	0.0495991	0.0495991	0.0495991
																						15.1947	15.1947	16.8639		1.66922	1.66922	1											2	1.25	0.0512814	0.0512814	0.0512814	0.0512814	0.0512814	0.0512814	0.0512814	0.0512814	0.0512814
																						14.3099	14.3099	15.7716		1.46162	1.46162	1											3	1.5625	0.0533841	0.0533841	0.0533841	0.0533841	0.0533841	0.0533841	0.0533841	0.0533841	0.0533841
																						13.3391	13.3391	14.5902		1.25116	1.25116	1											4	1.95312	0.0560126	0.0560126	0.0560126	0.0560126	0.0560126	0.0560126	0.0560126	0.0560126	0.0560126
																						12.2963	12.2963	13.3411		1.04487	1.04487	1											5	2.44141	0.0592982	0.0592982	0.0592982	0.0592982	0.0592982	0.0592982	0.0592982	0.0592982	0.0592982
																						11.2016	11.2016	12.0514		0.849817	0.849817	1											6	3.05176	0.0634052	0.0634052	0.0634052	0.0634052	0.0634052	0.0634052	0.0634052	0.0634052	0.0634052
																						10.0799	10.0799	10.7522		0.672221	0.672221	1											7	3.8147	0.068539	0.068539	0.068539	0.068539	0.068539	0.068539	0.068539	0.068539	0.068539
																						8.9586	8.9586	9.47525		0.516646	0.516646	1											8	4.76837	0.0749562	0.0749562	0.0749562	0.0749562	0.0749562	0.0749562	0.0749562	0.0749562	0.0749562
																						7.86494	7.86494	8.25047		0.385539	0.385539	1											9	5.96046	0.0829777	0.0829777	0.0829777	0.0829777	0.0829777	0.0829777	0.0829777	0.0829777	0.0829777
																						6.82365	6.82365	7.10283		0.279186	0.279186	1											10	7.45058	0.0930046	0.0930046	0.0930046	0.0930046	0.0930046	0.0930046	0.0930046	0.0930046	0.0930046
																						5.85472	5.85472	6.05076		0.196038	0.196038	1											11	9.31323	0.105538	0.105538	0.105538	0.105538	0.105538	0.105538	0.105538	0.105538	0.105538
																						4.97218	4.97218	5.10548		0.133292	0.133292	1											12	11.6415	0.121205	0.121205	0.121205	0.121205	0.121205	0.121205	0.121205	0.121205	0.121205
																						18.3964	18.3964	20.1616		1.76521	1.76521	1											13	14.5519	0.140789	0.140789	0.140789	0.140789	0.140789	0.140789	0.140789	0.140789	0.140789
																						17.8492	17.8492	19.5003		1.6511	1.6511	1											14	18.1899	0.165269	0.165269	0.165269	0.165269	0.165269	0.165269	0.165269	0.165269	0.165269
																						17.2092	17.2092	18.7322		1.52293	1.52293	1											15	22.7374	0.195868	0.195868	0.195868	0.195868	0.195868	0.195868	0.195868	0.195868	0.195868
																						16.4711	16.4711	17.8531		1.38205	1.38205	1
																						15.6329	15.6329	16.8639		1.23103	1.23103	1
																						14.6979	14.6979	15.7716		1.07363	1.07363	1
																						13.6756	13.6756	14.5902		0.914648	0.914648	1
																						12.5816	12.5816	13.3411		0.759476	0.759476	1
																						11.438	11.438	12.0514		0.613464	0.613464	1
																						10.2709	10.2709	10.7522		0.481237	0.481237	1
																						9.10914	9.10914	9.47525		0.366107	0.366107	1
																						7.98072	7.98072	8.25047		0.26975	0.26975	1
																						6.91064	6.91064	7.10283		0.192197	0.192197	1
																						5.91864	5.91864	6.05076		0.132115	0.132115	1
																						5.01821	5.01821	5.10548		0.0872631	0.0872631	1
																						19.0224	19.0224	20.1616		1.13923	1.13923	1
																						18.4379	18.4379	19.5003		1.0624	1.0624	1
																						17.7558	17.7558	18.7322		0.976334	0.976334	1
																						16.9711	16.9711	17.8531		0.882025	0.882025	1
																						16.0826	16.0826	16.8639		0.781292	0.781292	1
																						15.0948	15.0948	15.7716		0.676759	0.676759	1
																						14.0185	14.0185	14.5902		0.571714	0.571714	1
																						12.8713	12.8713	13.3411		0.469793	0.469793	1
																						11.6769	11.6769	12.0514		0.374552	0.374552	1
																						10.4632	10.4632	10.7522		0.289001	0.289001	1
																						9.26003	9.26003	9.47525		0.21522	0.21522	1
																						8.09631	8.09631	8.25047		0.154168	0.154168	1
																						6.99713	6.99713	7.10283		0.1057	0.1057	1
																						5.98198	5.98198	6.05076		0.0687823	0.0687823	1
																						5.06367	5.06367	5.10548		0.0418086	0.0418086	1
																						19.6557	19.6557	20.1616		0.505965	0.505965	1
																						19.0322	19.0322	19.5003		0.468069	0.468069	1
																						18.3063	18.3063	18.7322		0.425812	0.425812	1
																						17.4733	17.4733	17.8531		0.379778	0.379778	1
																						16.533	16.533	16.8639		0.330953	0.330953	1
																						15.4908	15.4908	15.7716		0.280723	0.280723	1
																						14.3595	14.3595	14.5902		0.230779	0.230779	1
																						13.1582	13.1582	13.3411		0.182945	0.182945	1
																						11.9125	11.9125	12.0514		0.13896	0.13896	1
																						10.6519	10.6519	10.7522		0.100235	0.100235	1
																						9.40757	9.40757	9.47525		0.0676764	0.0676764	1
																						8.20887	8.20887	8.25047		0.0416032	0.0416032	1
																						7.08105	7.08105	7.10283		0.0217827	0.0217827	1
																						6.0432	6.0432	6.05076		0.00755516	0.00755516	1
																						5.10747	5.10747	5.10548		-0.00199429	-0.00199429	1
																						20.2806	20.2806	20.1616		-0.118996	-0.118996	1
																						19.6175	19.6175	19.5003		-0.117283	-0.117283	1
																						18.8473	18.8473	18.7322		-0.115108	-0.115108	1
																						17.9655	17.9655	17.8531		-0.112373	-0.112373	1
																						16.9729	16.9729	16.8639		-0.108983	-0.108983	1
																						15.8764	15.8764	15.7716		-0.104853	-0.104853	1
																						14.6902	14.6902	14.5902		-0.0999318	-0.0999318	1
																						13.4353	13.4353	13.3411		-0.0942126	-0.0942126	1
																						12.1392	12.1392	12.0514		-0.0877515	-0.0877515	1
																						10.8328	10.8328	10.7522		-0.0806707	-0.0806707	1
																						9.5484	9.5484	9.47525		-0.0731522	-0.0731522	1
																						8.31589	8.31589	8.25047		-0.0654194	-0.0654194	1
																						7.16054	7.16054	7.10283		-0.0577099	-0.0577099	1
																						6.10101	6.10101	6.05076		-0.050248	-0.050248	1
																						5.1487	5.1487	5.10548		-0.0432217	-0.0432217	1
																						20.8825	20.8825	20.1616		-0.720866	-0.720866	1
																						20.1802	20.1802	19.5003		-0.679893	-0.679893	1
																						19.366	19.366	18.7322		-0.633819	-0.633819	1
																						18.4362	18.4362	17.8531		-0.583078	-0.583078	1
																						17.3924	17.3924	16.8639		-0.528504	-0.528504	1
																						16.2429	16.2429	15.7716		-0.471337	-0.471337	1
																						15.0034	15.0034	14.5902		-0.413155	-0.413155	1
																						13.6969	13.6969	13.3411		-0.355734	-0.355734	1
																						12.3523	12.3523	12.0514		-0.300847	-0.300847	1
																						11.0022	11.0022	10.7522		-0.25005	-0.25005	1
																						9.67975	9.67975	9.47525		-0.204503	-0.204503	1
																						8.41535	8.41535	8.25047		-0.164873	-0.164873	1
																						7.23416	7.23416	7.10283		-0.131326	-0.131326	1
																						6.15437	6.15437	6.05076		-0.103609	-0.103609	1
																						5.18665	5.18665	5.10548		-0.0811727	-0.0811727	1
																						21.4487	21.4487	20.1616		-1.287	-1.287	1
																						20.7084	20.7084	19.5003		-1.20811	-1.20811	1
																						19.8519	19.8519	18.7322		-1.11976	-1.11976	1
																						18.8761	18.8761	17.8531		-1.02295	-1.02295	1
																						17.7834	17.7834	16.8639		-0.919447	-0.919447	1
																						16.5834	16.5834	15.7716		-0.811805	-0.811805	1
																						15.2934	15.2934	14.5902		-0.703179	-0.703179	1
																						13.9382	13.9382	13.3411		-0.59704	-0.59704	1
																						12.5482	12.5482	12.0514		-0.496763	-0.496763	1
																						11.1574	11.1574	10.7522		-0.405211	-0.405211	1
																						9.79965	9.79965	9.47525		-0.324402	-0.324402	1
																						8.50582	8.50582	8.25047		-0.255348	-0.255348	1
																						7.30092	7.30092	7.10283		-0.198084	-0.198084	1
																						6.20262	6.20262	6.05076		-0.151859	-0.151859	1
																						5.22088	5.22088	5.10548		-0.1154	-0.1154	1
																						21.9695	21.9695	20.1616		-1.80786	-1.80786	1
																						21.1935	21.1935	19.5003		-1.69322	-1.69322	1
																						20.2973	20.2973	18.7322		-1.56514	-1.56514	1
																						19.2783	19.2783	17.8531		-1.42518	-1.42518	1
																						18.1399	18.1399	16.8639		-1.27602	-1.27602	1
																						16.893	16.893	15.7716		-1.12146	-1.12146	1
																						15.5564	15.5564	14.5902		-0.96615	-0.96615	1
																						14.1563	14.1563	13.3411		-0.815136	-0.815136	1
																						12.7247	12.7247	12.0514		-0.673254	-0.673254	1
																						11.2967	11.2967	10.7522		-0.544529	-0.544529	1
																						9.90696	9.90696	9.47525		-0.431713	-0.431713	1
																						8.58655	8.58655	8.25047		-0.336077	-0.336077	1
																						7.36032	7.36032	7.10283		-0.257482	-0.257482	1
																						6.24544	6.24544	6.05076		-0.194678	-0.194678	1
																						5.25118	5.25118	5.10548		-0.145703	-0.145703	1
																						22.439	22.439	20.1616		-2.27736	-2.27736	1
																						21.6301	21.6301	19.5003		-2.12981	-2.12981	1
																						20.6974	20.6974	18.7322		-1.96524	-1.96524	1
																						19.6389	19.6389	17.8531		-1.78576	-1.78576	1
																						18.4588	18.4588	16.8639		-1.59492	-1.59492	1
																						17.1693	17.1693	15.7716		-1.39769	-1.39769	1
																						15.7903	15.7903	14.5902		-1.2001	-1.2001	1
																						14.3497	14.3497	13.3411		-1.0086	-1.0086	1
																						12.8808	12.8808	12.0514		-0.829355	-0.829355	1
																						11.4196	11.4196	10.7522		-0.66739	-0.66739	1
																						10.0013	10.0013	9.47525		-0.526079	-0.526079	1
																						8.65735	8.65735	8.25047		-0.406874	-0.406874	1
																						7.41227	7.41227	7.10283		-0.309441	-0.309441	1
																						6.28281	6.28281	6.05076		-0.232048	-0.232048	1
																						5.27757	5.27757	5.10548		-0.172097	-0.172097	1
																						22.8545	22.8545	20.1616		-2.69285	-2.69285	1
																						22.0159	22.0159	19.5003		-2.51563	-2.51563	1
																						21.0504	21.0504	18.7322		-2.31824	-2.31824	1
																						19.9564	19.9564	17.8531		-2.10329	-2.10329	1
																						18.7391	18.7391	16.8639		-1.87516	-1.87516	1
																						17.4115	17.4115	15.7716		-1.63989	-1.63989	1
																						15.995	15.995	14.5902		-1.40472	-1.40472	1
																						14.5185	14.5185	13.3411		-1.1774	-1.1774	1
																						13.0166	13.0166	12.0514		-0.965195	-0.965195	1
																						11.5262	11.5262	10.7522		-0.774031	-0.774031	1
																						10.083	10.083	9.47525		-0.607782	-0.607782	1
																						8.7185	8.7185	8.25047		-0.468027	-0.468027	1
																						7.45706	7.45706	7.10283		-0.354224	-0.354224	1
																						6.31495	6.31495	6.05076		-0.264193	-0.264193	1
																						5.30024	5.30024	5.10548		-0.194761	-0.194761	1
																						23.2162	23.2162	20.1616		-3.0546	-3.0546	1
																						22.3514	22.3514	19.5003		-2.85112	-2.85112	1
																						21.3569	21.3569	18.7322		-2.62474	-2.62474	1
																						20.2317	20.2317	17.8531		-2.37855	-2.37855	1
																						18.9816	18.9816	16.8639		-2.11767	-2.11767	1
																						17.6206	17.6206	15.7716		-1.84906	-1.84906	1
																						16.1713	16.1713	14.5902		-1.58107	-1.58107	1
																						14.6637	14.6637	13.3411		-1.32254	-1.32254	1
																						13.1332	13.1332	12.0514		-1.08174	-1.08174	1
																						11.6175	11.6175	10.7522		-0.865324	-0.865324	1
																						10.1528	10.1528	9.47525		-0.677575	-0.677575	1
																						8.77063	8.77063	8.25047		-0.52016	-0.52016	1
																						7.49516	7.49516	7.10283		-0.392329	-0.392329	1
																						6.34226	6.34226	6.05076		-0.291499	-0.291499	1
																						5.31946	5.31946	5.10548		-0.213983	-0.213983	1
																						23.5267	23.5267	20.1616		-3.3651	-3.3651	1
																						22.639	22.639	19.5003		-3.13877	-3.13877	1
																						21.6194	21.6194	18.7322		-2.88721	-2.88721	1
																						20.4671	20.4671	17.8531		-2.61395	-2.61395	1
																						19.1886	19.1886	16.8639		-2.32472	-2.32472	1
																						17.7989	17.7989	15.7716		-2.02735	-2.02735	1
																						16.3213	16.3213	14.5902		-1.73111	-1.73111	1
																						14.7869	14.7869	13.3411		-1.4458	-1.4458	1
																						13.232	13.232	12.0514		-1.18053	-1.18053	1
																						11.6947	11.6947	10.7522		-0.942558	-0.942558	1
																						10.2118	10.2118	9.47525		-0.736513	-0.736513	1
																						8.81458	8.81458	8.25047		-0.564108	-0.564108	1
																						7.52723	7.52723	7.10283		-0.424401	-0.424401	1
																						6.36521	6.36521	6.05076		-0.314448	-0.314448	1
																						5.33559	5.33559	5.10548		-0.230117	-0.230117	1
																						23.79	23.79	20.1616		-3.62837	-3.62837	1
																						22.8827	22.8827	19.5003		-3.38246	-3.38246	1
																						21.8415	21.8415	18.7322		-3.10933	-3.10933	1
																						20.666	20.666	17.8531		-2.81291	-2.81291	1
																						19.3634	19.3634	16.8639		-2.4995	-2.4995	1
																						17.9492	17.9492	15.7716		-2.17762	-2.17762	1
																						16.4476	16.4476	14.5902		-1.85738	-1.85738	1
																						14.8905	14.8905	13.3411		-1.54938	-1.54938	1
																						13.3148	13.3148	12.0514		-1.2634	-1.2634	1
																						11.7594	11.7594	10.7522		-1.00725	-1.00725	1
																						10.261	10.261	9.47525		-0.785802	-0.785802	1
																						8.85128	8.85128	8.25047		-0.600808	-0.600808	1
																						7.55398	7.55398	7.10283		-0.451147	-0.451147	1
																						6.38432	6.38432	6.05076		-0.333563	-0.333563	1
																						5.34902	5.34902	5.10548		-0.243542	-0.243542	1
[truncated: 54 more columns]

## Sheet: Partial Competitive
																V_max*(([S]/K_s )+([S]/(aK_s*K_i )))/((1+([S]/K_s )+([I]/K_i )+(([S]*[I])/(aK_s*K_i ))) )							Calculated values
		No Inhibitor	[I]1	[I]2	[I]3	[I]4	[I]5	[I]6	[I]7	[I]8	[I]9	[I]10	[I]11	[I]12	[I]13	[I]14	[I]15						No Inhibitor	[I]1	[I]2	[I]3	[I]4	[I]5	[I]6	[I]7	[I]8	[I]9	[I]10	[I]11	[I]12	[I]13	[I]14	[I]15
		0	0.0439805	0.0549756	0.0687195	0.0858993	0.107374	0.134218	0.167772	0.209715	0.262144	0.32768	0.4096	0.512	0.64	0.8	1	Km	aKm	Vmax	Ki		0	0.0439805	0.0549756	0.0687195	0.0858993	0.107374	0.134218	0.167772	0.209715	0.262144	0.32768	0.4096	0.512	0.64	0.8	1
[S]1	1	13.6364	16.6997	17.2238	17.7926	18.3964	19.0224	19.6557	20.2806	20.8825	21.4487	21.9695	22.439	22.8545	23.2162	23.5267	23.79	0.156996	1466.24	23.3221	31665		20.1574	20.1574	20.1574	20.1574	20.1574	20.1574	20.1574	20.1574	20.1574	20.1574	20.1574	20.1574	20.1574	20.1574	20.1573	20.1573		20.1574	20.1574	20.1574	20.1574	20.1574	20.1574	20.1574	20.1574	20.1574	20.1574
[S]2	0.8	13.3333	16.2475	16.7432	17.2802	17.8492	18.4379	19.0322	19.6175	20.1802	20.7084	21.1935	21.6301	22.0159	22.3514	22.639	22.8827						19.496	19.496	19.496	19.496	19.496	19.496	19.496	19.496	19.496	19.496	19.496	19.496	19.496	19.496	19.496	19.4959		19.496	19.496	19.496	19.496	19.496	19.496	19.496	19.496	19.496	19.496
[S]3	0.64	12.973	15.7156	16.1788	16.6797	17.2092	17.7558	18.3063	18.8473	19.366	19.8519	20.2973	20.6974	21.0504	21.3569	21.6194	21.8415						18.728	18.728	18.7279	18.7279	18.7279	18.7279	18.7279	18.7279	18.7279	18.7279	18.7279	18.7279	18.7279	18.7279	18.7279	18.7278		18.728	18.728	18.7279	18.7279	18.7279	18.7279	18.7279	18.7279	18.7279	18.7279
[S]4	0.512	12.549	15.0977	15.5247	15.9854	16.4711	16.9711	17.4733	17.9655	18.4362	18.8761	19.2783	19.6389	19.9564	20.2317	20.4671	20.666						17.849	17.849	17.849	17.849	17.8489	17.8489	17.8489	17.8489	17.8489	17.8489	17.8489	17.8489	17.8489	17.8489	17.8489	17.8488		17.849	17.849	17.849	17.849	17.8489	17.8489	17.8489	17.8489	17.8489	17.8489
[S]5	0.4096	12.0565	14.3904	14.7779	15.1947	15.6329	16.0826	16.533	16.9729	17.3924	17.7834	18.1399	18.4588	18.7391	18.9816	19.1886	19.3634						16.8598	16.8598	16.8598	16.8598	16.8598	16.8598	16.8598	16.8598	16.8598	16.8598	16.8598	16.8598	16.8597	16.8597	16.8597	16.8597		16.8598	16.8598	16.8598	16.8598	16.8598	16.8598	16.8598	16.8598	16.8598	16.8598
[S]6	0.32768	11.4927	13.5944	13.9397	14.3099	14.6979	15.0948	15.4908	15.8764	16.2429	16.5834	16.893	17.1693	17.4115	17.6206	17.7989	17.9492			Sum R2	629.365		15.7676	15.7676	15.7676	15.7676	15.7676	15.7676	15.7675	15.7675	15.7675	15.7675	15.7675	15.7675	15.7675	15.7675	15.7674	15.7674		15.7676	15.7676	15.7676	15.7676	15.7676	15.7676	15.7675	15.7675	15.7675	15.7675
[S]7	0.262144	10.858	12.7152	13.0168	13.3391	13.6756	14.0185	14.3595	14.6902	15.0034	15.2934	15.5564	15.7903	15.995	16.1713	16.3213	16.4476			Sum residuals %	18.5388		14.5864	14.5864	14.5864	14.5864	14.5864	14.5863	14.5863	14.5863	14.5863	14.5863	14.5863	14.5863	14.5863	14.5863	14.5862	14.5862		14.5864	14.5864	14.5864	14.5864	14.5864	14.5863	14.5863	14.5863	14.5863	14.5863
[S]8	0.209715	10.1568	11.7642	12.0219	12.2963	12.5816	12.8713	13.1582	13.4353	13.6969	13.9382	14.1563	14.3497	14.5185	14.6637	14.7869	14.8905						13.3374	13.3374	13.3374	13.3374	13.3374	13.3374	13.3374	13.3374	13.3374	13.3374	13.3374	13.3374	13.3373	13.3373	13.3373	13.3372		13.3374	13.3374	13.3374	13.3374	13.3374	13.3374	13.3374	13.3374	13.3374	13.3374
[S]9	0.167772	9.39822	10.7584	10.9735	11.2016	11.438	11.6769	11.9125	12.1392	12.3523	12.5482	12.7247	12.8808	13.0166	13.1332	13.232	13.3148						12.0479	12.0479	12.0479	12.0479	12.0479	12.0479	12.0479	12.0479	12.0479	12.0479	12.0479	12.0479	12.0478	12.0478	12.0478	12.0478		12.0479	12.0479	12.0479	12.0479	12.0479	12.0479	12.0479	12.0479	12.0479	12.0479
[S]10	0.134218	8.5957	9.71958	9.89481	10.0799	10.2709	10.4632	10.6519	10.8328	11.0022	11.1574	11.2967	11.4196	11.5262	11.6175	11.6947	11.7594						10.7489	10.7489	10.7489	10.7489	10.7489	10.7489	10.7489	10.7489	10.7489	10.7489	10.7488	10.7488	10.7488	10.7488	10.7488	10.7487		10.7489	10.7489	10.7489	10.7489	10.7489	10.7489	10.7489	10.7489	10.7489	10.7489
[S]11	0.107374	7.7667	8.67282	8.81207	8.9586	9.10914	9.26003	9.40757	9.5484	9.67975	9.79965	9.90696	10.0013	10.083	10.1528	10.2118	10.261						9.47226	9.47225	9.47225	9.47224	9.47224	9.47224	9.47223	9.47223	9.47222	9.47221	9.4722	9.47218	9.47217	9.47214	9.47211	9.47208		9.47226	9.47225	9.47225	9.47224	9.47224	9.47224	9.47223	9.47223	9.47222	9.47221
[S]12	0.0858993	6.93112	7.64381	7.75177	7.86494	7.98072	8.09631	8.20887	8.31589	8.41535	8.50582	8.58655	8.65735	8.7185	8.77063	8.81458	8.85128						8.24777	8.24776	8.24776	8.24776	8.24776	8.24775	8.24775	8.24774	8.24774	8.24773	8.24772	8.2477	8.24769	8.24766	8.24764	8.2476		8.24777	8.24776	8.24776	8.24776	8.24776	8.24775	8.24775	8.24774	8.24774	8.24773
[S]13	0.0687195	6.1095	6.65658	6.7383	6.82365	6.91064	6.99713	7.08105	7.16054	7.23416	7.30092	7.36032	7.41227	7.45706	7.49516	7.52723	7.55398						7.10043	7.10042	7.10042	7.10042	7.10041	7.10041	7.1004	7.1004	7.10039	7.10039	7.10037	7.10036	7.10035	7.10033	7.1003	7.10027		7.10043	7.10042	7.10042	7.10042	7.10041	7.10041	7.1004	7.1004	7.10039	7.10039
[S]14	0.0549756	5.32106	5.7313	5.79178	5.85472	5.91864	5.98198	6.0432	6.10101	6.15437	6.20262	6.24544	6.28281	6.31495	6.34226	6.36521	6.38432						6.04864	6.04864	6.04864	6.04863	6.04863	6.04863	6.04863	6.04862	6.04861	6.04861	6.0486	6.04859	6.04857	6.04855	6.04853	6.0485		6.04864	6.04864	6.04864	6.04863	6.04863	6.04863	6.04863	6.04862	6.04861	6.04861
[S]15	0.0439805	4.58192	4.88288	4.92671	4.97218	5.01821	5.06367	5.10747	5.1487	5.18665	5.22088	5.25118	5.27757	5.30024	5.31946	5.33559	5.34902						5.10364	5.10364	5.10364	5.10364	5.10363	5.10363	5.10363	5.10362	5.10362	5.10361	5.1036	5.10359	5.10358	5.10356	5.10354	5.10352		5.10364	5.10364	5.10364	5.10364	5.10363	5.10363	5.10363	5.10362	5.10362	5.10361
	1	1	1	1	1	1	1	1	1	1	1	1	1	1	1	1	1																					1	1	20.1574	20.1574	20.1574	20.1574	20.1574	20.1574	20.1574	20.1574	20.1574	20.1574
	1	1	1	1	1	1	1	1	1	1	1	1	1	1	1	1	1					13.6364	13.6364	20.1574		6.52105	6.52105	2										0.8	0.8	19.496	19.496	19.496	19.496	19.496	19.496	19.496	19.496	19.496	19.496
	1	1	1	1	1	1	1	1	1	1	1	1	1	1	1	1	1					13.3333	13.3333	19.496		6.16271	6.16271	2										0.64	0.64	18.728	18.728	18.7279	18.7279	18.7279	18.7279	18.7279	18.7279	18.7279	18.7279
	1	1	1	1	1	1	1	1	1	1	1	1	1	1	1	1	1					12.973	12.973	18.728		5.75498	5.75498	2										0.512	0.512	17.849	17.849	17.849	17.849	17.8489	17.8489	17.8489	17.8489	17.8489	17.8489
	1	1	1	1	1	1	1	1	1	1	1	1	1	1	1	1	1					12.549	12.549	17.849		5.29994	5.29994	2										0.4096	0.4096	16.8598	16.8598	16.8598	16.8598	16.8598	16.8598	16.8598	16.8598	16.8598	16.8598
	1	1	1	1	1	1	1	1	1	1	1	1	1	1	1	1	1					12.0565	12.0565	16.8598		4.8033	4.8033	2										0.32768	0.32768	15.7676	15.7676	15.7676	15.7676	15.7676	15.7676	15.7675	15.7675	15.7675	15.7675
	1	1	1	1	1	1	1	1	1	1	1	1	1	1	1	1	1					11.4927	11.4927	15.7676		4.27487	4.27487	2										0.262144	0.262144	14.5864	14.5864	14.5864	14.5864	14.5864	14.5863	14.5863	14.5863	14.5863	14.5863
	1	1	1	1	1	1	1	1	1	1	1	1	1	1	1	1	1					10.858	10.858	14.5864		3.72837	3.72837	2										0.209715	0.209715	13.3374	13.3374	13.3374	13.3374	13.3374	13.3374	13.3374	13.3374	13.3374	13.3374
	1	1	1	1	1	1	1	1	1	1	1	1	1	1	1	1	1					10.1568	10.1568	13.3374		3.18058	3.18058	2										0.167772	0.167772	12.0479	12.0479	12.0479	12.0479	12.0479	12.0479	12.0479	12.0479	12.0479	12.0479
	1	1	1	1	1	1	1	1	1	1	1	1	1	1	1	1	1					9.39822	9.39822	12.0479		2.64971	2.64971	2										0.134218	0.134218	10.7489	10.7489	10.7489	10.7489	10.7489	10.7489	10.7489	10.7489	10.7489	10.7489
	1	1	1	1	1	1	1	1	1	1	1	1	1	1	1	1	1					8.5957	8.5957	10.7489		2.1532	2.1532	2										0.107374	0.107374	9.47226	9.47225	9.47225	9.47224	9.47224	9.47224	9.47223	9.47223	9.47222	9.47221
	1	1	1	1	1	1	1	1	1	1	1	1	1	1	1	1	1					7.7667	7.7667	9.47226		1.70556	1.70556	2										0.0858993	0.0858993	8.24777	8.24776	8.24776	8.24776	8.24776	8.24775	8.24775	8.24774	8.24774	8.24773
	1	1	1	1	1	1	1	1	1	1	1	1	1	1	1	1	1					6.93112	6.93112	8.24777		1.31665	1.31665	2										0.0687195	0.0687195	7.10043	7.10042	7.10042	7.10042	7.10041	7.10041	7.1004	7.1004	7.10039	7.10039
	1	1	1	1	1	1	1	1	1	1	1	1	1	1	1	1	1					6.1095	6.1095	7.10043		0.990923	0.990923	2										0.0549756	0.0549756	6.04864	6.04864	6.04864	6.04863	6.04863	6.04863	6.04863	6.04862	6.04861	6.04861
	1	1	1	1	1	1	1	1	1	1	1	1	1	1	1	1	1					5.32106	5.32106	6.04864		0.727588	0.727588	2										0.0439805	0.0439805	5.10364	5.10364	5.10364	5.10364	5.10363	5.10363	5.10363	5.10362	5.10362	5.10361
																						4.58192	4.58192	5.10364		0.521724	0.521724	2
																						16.6997	16.6997	20.1574		3.45769	3.45769	2											1	0.0496095	0.0496096	0.0496096	0.0496096	0.0496096	0.0496096	0.0496096	0.0496096	0.0496096	0.0496096
																						16.2475	16.2475	19.496		3.24853	3.24853	2											1.25	0.0512925	0.0512925	0.0512925	0.0512925	0.0512925	0.0512925	0.0512925	0.0512925	0.0512925	0.0512925
																						15.7156	15.7156	18.728		3.0124	3.0124	2											1.5625	0.0533961	0.0533961	0.0533961	0.0533961	0.0533961	0.0533961	0.0533962	0.0533962	0.0533962	0.0533962
																						15.0977	15.0977	17.849		2.75129	2.75129	2											1.95312	0.0560257	0.0560257	0.0560257	0.0560257	0.0560257	0.0560257	0.0560257	0.0560257	0.0560258	0.0560258
																						14.3904	14.3904	16.8598		2.46938	2.46938	2											2.44141	0.0593126	0.0593126	0.0593126	0.0593127	0.0593127	0.0593127	0.0593127	0.0593127	0.0593127	0.0593128
																						13.5944	13.5944	15.7676		2.17315	2.17315	2											3.05176	0.0634213	0.0634213	0.0634213	0.0634214	0.0634214	0.0634214	0.0634214	0.0634214	0.0634214	0.0634215
																						12.7152	12.7152	14.5864		1.87114	1.87114	2											3.8147	0.0685572	0.0685572	0.0685572	0.0685572	0.0685572	0.0685573	0.0685573	0.0685573	0.0685573	0.0685574
																						11.7642	11.7642	13.3374		1.57323	1.57323	2											4.76837	0.074977	0.074977	0.074977	0.0749771	0.0749771	0.0749771	0.0749771	0.0749772	0.0749772	0.0749773
																						10.7584	10.7584	12.0479		1.28957	1.28957	2											5.96046	0.0830018	0.0830018	0.0830018	0.0830019	0.0830019	0.0830019	0.0830019	0.083002	0.083002	0.0830021
																						9.71958	9.71958	10.7489		1.02932	1.02932	2											7.45058	0.0930328	0.0930328	0.0930328	0.0930329	0.0930329	0.0930329	0.093033	0.093033	0.0930331	0.0930332
																						8.67282	8.67282	9.47225		0.799428	0.799428	2											9.31323	0.105571	0.105572	0.105572	0.105572	0.105572	0.105572	0.105572	0.105572	0.105572	0.105572
																						7.64381	7.64381	8.24776		0.603953	0.603953	2											11.6415	0.121245	0.121245	0.121245	0.121245	0.121245	0.121245	0.121245	0.121245	0.121245	0.121246
																						6.65658	6.65658	7.10042		0.443841	0.443841	2											14.5519	0.140837	0.140837	0.140837	0.140837	0.140837	0.140837	0.140837	0.140837	0.140837	0.140837
																						5.7313	5.7313	6.04864		0.317339	0.317339	2											18.1899	0.165326	0.165326	0.165327	0.165327	0.165327	0.165327	0.165327	0.165327	0.165327	0.165327
																						4.88288	4.88288	5.10364		0.220755	0.220755	2											22.7374	0.195938	0.195939	0.195939	0.195939	0.195939	0.195939	0.195939	0.195939	0.195939	0.19594
																						17.2238	17.2238	20.1574		2.93362	2.93362	2
																						16.7432	16.7432	19.496		2.75288	2.75288	2												13.6364	16.6997	17.2238	17.7926	18.3964	19.0224	19.6557	20.2806	20.8825	21.4487
																						16.1788	16.1788	18.7279		2.54914	2.54914	2												13.3333	16.2475	16.7432	17.2802	17.8492	18.4379	19.0322	19.6175	20.1802	20.7084
																						15.5247	15.5247	17.849		2.32423	2.32423	2												12.973	15.7156	16.1788	16.6797	17.2092	17.7558	18.3063	18.8473	19.366	19.8519
																						14.7779	14.7779	16.8598		2.08191	2.08191	2												12.549	15.0977	15.5247	15.9854	16.4711	16.9711	17.4733	17.9655	18.4362	18.8761
																						13.9397	13.9397	15.7676		1.82787	1.82787	2												12.0565	14.3904	14.7779	15.1947	15.6329	16.0826	16.533	16.9729	17.3924	17.7834
																						13.0168	13.0168	14.5864		1.56957	1.56957	2												11.4927	13.5944	13.9397	14.3099	14.6979	15.0948	15.4908	15.8764	16.2429	16.5834
																						12.0219	12.0219	13.3374		1.31554	1.31554	2												10.858	12.7152	13.0168	13.3391	13.6756	14.0185	14.3595	14.6902	15.0034	15.2934
																						10.9735	10.9735	12.0479		1.07447	1.07447	2												10.1568	11.7642	12.0219	12.2963	12.5816	12.8713	13.1582	13.4353	13.6969	13.9382
																						9.89481	9.89481	10.7489		0.854085	0.854085	2												9.39822	10.7584	10.9735	11.2016	11.438	11.6769	11.9125	12.1392	12.3523	12.5482
																						8.81207	8.81207	9.47225		0.660178	0.660178	2												8.5957	9.71958	9.89481	10.0799	10.2709	10.4632	10.6519	10.8328	11.0022	11.1574
																						7.75177	7.75177	8.24776		0.495991	0.495991	2												7.7667	8.67282	8.81207	8.9586	9.10914	9.26003	9.40757	9.5484	9.67975	9.79965
																						6.7383	6.7383	7.10042		0.362115	0.362115	2												6.93112	7.64381	7.75177	7.86494	7.98072	8.09631	8.20887	8.31589	8.41535	8.50582
																						5.79178	5.79178	6.04864		0.256857	0.256857	2												6.1095	6.65658	6.7383	6.82365	6.91064	6.99713	7.08105	7.16054	7.23416	7.30092
																						4.92671	4.92671	5.10364		0.176923	0.176923	2												5.32106	5.7313	5.79178	5.85472	5.91864	5.98198	6.0432	6.10101	6.15437	6.20262
																						17.7926	17.7926	20.1574		2.36479	2.36479	2												4.58192	4.88288	4.92671	4.97218	5.01821	5.06367	5.10747	5.1487	5.18665	5.22088
																						17.2802	17.2802	19.496		2.21585	2.21585	2
																						16.6797	16.6797	18.7279		2.04824	2.04824	2												1/s	0	0.0439805	0.0549756	0.0687195	0.0858993	0.107374	0.134218	0.167772	0.209715
																						15.9854	15.9854	17.849		1.86359	1.86359	2											1	1	0.0496095	0.0496096	0.0496096	0.0496096	0.0496096	0.0496096	0.0496096	0.0496096	0.0496096
																						15.1947	15.1947	16.8598		1.66511	1.66511	2											2	1.25	0.0512925	0.0512925	0.0512925	0.0512925	0.0512925	0.0512925	0.0512925	0.0512925	0.0512925
																						14.3099	14.3099	15.7676		1.45761	1.45761	2											3	1.5625	0.0533961	0.0533961	0.0533961	0.0533961	0.0533961	0.0533961	0.0533962	0.0533962	0.0533962
																						13.3391	13.3391	14.5864		1.24728	1.24728	2											4	1.95312	0.0560257	0.0560257	0.0560257	0.0560257	0.0560257	0.0560257	0.0560257	0.0560257	0.0560258
																						12.2963	12.2963	13.3374		1.04115	1.04115	2											5	2.44141	0.0593126	0.0593126	0.0593126	0.0593127	0.0593127	0.0593127	0.0593127	0.0593127	0.0593127
																						11.2016	11.2016	12.0479		0.846307	0.846307	2											6	3.05176	0.0634213	0.0634213	0.0634213	0.0634214	0.0634214	0.0634214	0.0634214	0.0634214	0.0634214
																						10.0799	10.0799	10.7489		0.668951	0.668951	2											7	3.8147	0.0685572	0.0685572	0.0685572	0.0685572	0.0685572	0.0685573	0.0685573	0.0685573	0.0685573
																						8.9586	8.9586	9.47224		0.513643	0.513643	2											8	4.76837	0.074977	0.074977	0.074977	0.0749771	0.0749771	0.0749771	0.0749771	0.0749772	0.0749772
																						7.86494	7.86494	8.24776		0.382824	0.382824	2											9	5.96046	0.0830018	0.0830018	0.0830018	0.0830019	0.0830019	0.0830019	0.0830019	0.083002	0.083002
																						6.82365	6.82365	7.10042		0.276767	0.276767	2											10	7.45058	0.0930328	0.0930328	0.0930328	0.0930329	0.0930329	0.0930329	0.093033	0.093033	0.0930331
																						5.85472	5.85472	6.04863		0.193915	0.193915	2											11	9.31323	0.105571	0.105572	0.105572	0.105572	0.105572	0.105572	0.105572	0.105572	0.105572
																						4.97218	4.97218	5.10364		0.131451	0.131451	2											12	11.6415	0.121245	0.121245	0.121245	0.121245	0.121245	0.121245	0.121245	0.121245	0.121245
																						18.3964	18.3964	20.1574		1.76097	1.76097	2											13	14.5519	0.140837	0.140837	0.140837	0.140837	0.140837	0.140837	0.140837	0.140837	0.140837
																						17.8492	17.8492	19.496		1.64687	1.64687	2											14	18.1899	0.165326	0.165326	0.165327	0.165327	0.165327	0.165327	0.165327	0.165327	0.165327
																						17.2092	17.2092	18.7279		1.51872	1.51872	2											15	22.7374	0.195938	0.195939	0.195939	0.195939	0.195939	0.195939	0.195939	0.195939	0.195939
																						16.4711	16.4711	17.8489		1.37788	1.37788	2
																						15.6329	15.6329	16.8598		1.22692	1.22692	2
																						14.6979	14.6979	15.7676		1.06962	1.06962	2
																						13.6756	13.6756	14.5864		0.910765	0.910765	2
																						12.5816	12.5816	13.3374		0.75576	0.75576	2
																						11.438	11.438	12.0479		0.609952	0.609952	2
																						10.2709	10.2709	10.7489		0.477964	0.477964	2
																						9.10914	9.10914	9.47224		0.363102	0.363102	2
																						7.98072	7.98072	8.24776		0.267032	0.267032	2
																						6.91064	6.91064	7.10041		0.189775	0.189775	2
																						5.91864	5.91864	6.04863		0.129989	0.129989	2
																						5.01821	5.01821	5.10363		0.0854209	0.0854209	2
																						19.0224	19.0224	20.1574		1.13499	1.13499	2
																						18.4379	18.4379	19.496		1.05817	1.05817	2
																						17.7558	17.7558	18.7279		0.972121	0.972121	2
																						16.9711	16.9711	17.8489		0.877853	0.877853	2
																						16.0826	16.0826	16.8598		0.777184	0.777184	2
																						15.0948	15.0948	15.7676		0.672745	0.672745	2
																						14.0185	14.0185	14.5863		0.567828	0.567828	2
																						12.8713	12.8713	13.3374		0.466073	0.466073	2
																						11.6769	11.6769	12.0479		0.371036	0.371036	2
																						10.4632	10.4632	10.7489		0.285724	0.285724	2
																						9.26003	9.26003	9.47224		0.212211	0.212211	2
																						8.09631	8.09631	8.24775		0.151446	0.151446	2
																						6.99713	6.99713	7.10041		0.103275	0.103275	2
																						5.98198	5.98198	6.04863		0.0666531	0.0666531	2
																						5.06367	5.06367	5.10363		0.0399637	0.0399637	2
																						19.6557	19.6557	20.1574		0.501718	0.501718	2
																						19.0322	19.0322	19.496		0.463831	0.463831	2
																						18.3063	18.3063	18.7279		0.421597	0.421597	2
																						17.4733	17.4733	17.8489		0.375602	0.375602	2
																						16.533	16.533	16.8598		0.326841	0.326841	2
																						15.4908	15.4908	15.7675		0.276705	0.276705	2
																						14.3595	14.3595	14.5863		0.226888	0.226888	2
																						13.1582	13.1582	13.3374		0.17922	0.17922	2
																						11.9125	11.9125	12.0479		0.135439	0.135439	2
																						10.6519	10.6519	10.7489		0.0969532	0.0969532	2
																						9.40757	9.40757	9.47223		0.0646624	0.0646624	2
																						8.20887	8.20887	8.24775		0.0388772	0.0388772	2
																						7.08105	7.08105	7.1004		0.019354	0.019354	2
																						6.0432	6.0432	6.04863		0.00542218	0.00542218	2
																						5.10747	5.10747	5.10363		-0.00384256	-0.00384256	2
																						20.2806	20.2806	20.1574		-0.123246	-0.123246	2
																						19.6175	19.6175	19.496		-0.121524	-0.121524	2
																						18.8473	18.8473	18.7279		-0.119327	-0.119327	2
																						17.9655	17.9655	17.8489		-0.116553	-0.116553	2
																						16.9729	16.9729	16.8598		-0.113099	-0.113099	2
																						15.8764	15.8764	15.7675		-0.108877	-0.108877	2
																						14.6902	14.6902	14.5863		-0.103828	-0.103828	2
																						13.4353	13.4353	13.3374		-0.0979439	-0.0979439	2
																						12.1392	12.1392	12.0479		-0.091279	-0.091279	2
																						10.8328	10.8328	10.7489		-0.083959	-0.083959	2
																						9.5484	9.5484	9.47223		-0.0761722	-0.0761722	2
																						8.31589	8.31589	8.24774		-0.068151	-0.068151	2
																						7.16054	7.16054	7.1004		-0.0601438	-0.0601438	2
																						6.10101	6.10101	6.04862		-0.0523857	-0.0523857	2
																						5.1487	5.1487	5.10362		-0.0450742	-0.0450742	2
																						20.8825	20.8825	20.1574		-0.725119	-0.725119	2
																						20.1802	20.1802	19.496		-0.684138	-0.684138	2
																						19.366	19.366	18.7279		-0.638043	-0.638043	2
																						18.4362	18.4362	17.8489		-0.587263	-0.587263	2
																						17.3924	17.3924	16.8598		-0.532627	-0.532627	2
																						16.2429	16.2429	15.7675		-0.475368	-0.475368	2
																						15.0034	15.0034	14.5863		-0.417059	-0.417059	2
																						13.6969	13.6969	13.3374		-0.359473	-0.359473	2
																						12.3523	12.3523	12.0479		-0.304383	-0.304383	2
																						11.0022	11.0022	10.7489		-0.253346	-0.253346	2
																						9.67975	9.67975	9.47222		-0.207531	-0.207531	2
																						8.41535	8.41535	8.24774		-0.167611	-0.167611	2
																						7.23416	7.23416	7.10039		-0.133766	-0.133766	2
																						6.15437	6.15437	6.04861		-0.105753	-0.105753	2
																						5.18665	5.18665	5.10362		-0.0830304	-0.0830304	2
																						21.4487	21.4487	20.1574		-1.29126	-1.29126	2
																						20.7084	20.7084	19.496		-1.21236	-1.21236	2
																						19.8519	19.8519	18.7279		-1.12399	-1.12399	2
																						18.8761	18.8761	17.8489		-1.02714	-1.02714	2
																						17.7834	17.7834	16.8598		-0.923578	-0.923578	2
																						16.5834	16.5834	15.7675		-0.815845	-0.815845	2
																						15.2934	15.2934	14.5863		-0.707092	-0.707092	2
																						13.9382	13.9382	13.3374		-0.600788	-0.600788	2
																						12.5482	12.5482	12.0479		-0.500308	-0.500308	2
																						11.1574	11.1574	10.7489		-0.408516	-0.408516	2
																						9.79965	9.79965	9.47221		-0.327439	-0.327439	2
																						8.50582	8.50582	8.24773		-0.258095	-0.258095	2
																						7.30092	7.30092	7.10039		-0.200533	-0.200533	2
																						6.20262	6.20262	6.04861		-0.15401	-0.15401	2
																						5.22088	5.22088	5.10361		-0.117264	-0.117264	2
																						21.9695	21.9695	20.1574		-1.81212	-1.81212	2
																						21.1935	21.1935	19.496		-1.69748	-1.69748	2
																						20.2973	20.2973	18.7279		-1.56938	-1.56938	2
																						19.2783	19.2783	17.8489		-1.42938	-1.42938	2
																						18.1399	18.1399	16.8598		-1.28016	-1.28016	2
																						16.893	16.893	15.7675		-1.12551	-1.12551	2
																						15.5564	15.5564	14.5863		-0.970074	-0.970074	2
																						14.1563	14.1563	13.3374		-0.818896	-0.818896	2
																						12.7247	12.7247	12.0479		-0.676811	-0.676811	2
																						11.2967	11.2967	10.7488		-0.547846	-0.547846	2
																						9.90696	9.90696	9.4722		-0.434762	-0.434762	2
																						8.58655	8.58655	8.24772		-0.338835	-0.338835	2
																						7.36032	7.36032	7.10037		-0.259941	-0.259941	2
																						6.24544	6.24544	6.0486		-0.196838	-0.196838	2
																						5.25118	5.25118	5.1036		-0.147576	-0.147576	2
																						22.439	22.439	20.1574		-2.28163	-2.28163	2
																						21.6301	21.6301	19.496		-2.13408	-2.13408	2
																						20.6974	20.6974	18.7279		-1.96949	-1.96949	2
																						19.6389	19.6389	17.8489		-1.78997	-1.78997	2
																						18.4588	18.4588	16.8598		-1.59907	-1.59907	2
																						17.1693	17.1693	15.7675		-1.40175	-1.40175	2
																						15.7903	15.7903	14.5863		-1.20403	-1.20403	2
																						14.3497	14.3497	13.3374		-1.01238	-1.01238	2
																						12.8808	12.8808	12.0479		-0.832927	-0.832927	2
																						11.4196	11.4196	10.7488		-0.670723	-0.670723	2
																						10.0013	10.0013	9.47218		-0.529142	-0.529142	2
																						8.65735	8.65735	8.2477		-0.409647	-0.409647	2
																						7.41227	7.41227	7.10036		-0.311913	-0.311913	2
																						6.28281	6.28281	6.04859		-0.23422	-0.23422	2
																						5.27757	5.27757	5.10359		-0.17398	-0.17398	2
																						22.8545	22.8545	20.1574		-2.69713	-2.69713	2
																						22.0159	22.0159	19.496		-2.51991	-2.51991	2
																						21.0504	21.0504	18.7279		-2.32249	-2.32249	2
																						19.9564	19.9564	17.8489		-2.10751	-2.10751	2
																						18.7391	18.7391	16.8597		-1.87933	-1.87933	2
																						17.4115	17.4115	15.7675		-1.64397	-1.64397	2
																						15.995	15.995	14.5863		-1.40868	-1.40868	2
																						14.5185	14.5185	13.3373		-1.18119	-1.18119	2
																						13.0166	13.0166	12.0478		-0.968786	-0.968786	2
																						11.5262	11.5262	10.7488		-0.777382	-0.777382	2
																						10.083	10.083	9.47217		-0.610863	-0.610863	2
																						8.7185	8.7185	8.24769		-0.470817	-0.470817	2
																						7.45706	7.45706	7.10035		-0.356711	-0.356711	2
																						6.31495	6.31495	6.04857		-0.26638	-0.26638	2
																						5.30024	5.30024	5.10358		-0.196656	-0.196656	2
																						23.2162	23.2162	20.1574		-3.05889	-3.05889	2
																						22.3514	22.3514	19.496		-2.85541	-2.85541	2
																						21.3569	21.3569	18.7279		-2.62901	-2.62901	2
																						20.2317	20.2317	17.8489		-2.3828	-2.3828	2
																						18.9816	18.9816	16.8597		-2.12185	-2.12185	2
																						17.6206	17.6206	15.7675		-1.85316	-1.85316	2
																						16.1713	16.1713	14.5863		-1.58505	-1.58505	2
																						14.6637	14.6637	13.3373		-1.32636	-1.32636	2
																						13.1332	13.1332	12.0478		-1.08536	-1.08536	2
																						11.6175	11.6175	10.7488		-0.868698	-0.868698	2
																						10.1528	10.1528	9.47214		-0.680679	-0.680679	2
																						8.77063	8.77063	8.24766		-0.522971	-0.522971	2
																						7.49516	7.49516	7.10033		-0.394836	-0.394836	2
																						6.34226	6.34226	6.04855		-0.293703	-0.293703	2
																						5.31946	5.31946	5.10356		-0.215895	-0.215895	2
																						23.5267	23.5267	20.1573		-3.3694	-3.3694	2
																						22.639	22.639	19.496		-3.14308	-3.14308	2
																						21.6194	21.6194	18.7279		-2.89151	-2.89151	2
																						20.4671	20.4671	17.8489		-2.61821	-2.61821	2
																						19.1886	19.1886	16.8597		-2.32893	-2.32893	2
																						17.7989	17.7989	15.7674		-2.03147	-2.03147	2
																						16.3213	16.3213	14.5862		-1.73511	-1.73511	2
																						14.7869	14.7869	13.3373		-1.44965	-1.44965	2
																						13.232	13.232	12.0478		-1.18417	-1.18417	2
																						11.6947	11.6947	10.7488		-0.945962	-0.945962	2
																						10.2118	10.2118	9.47211		-0.739645	-0.739645	2
																						8.81458	8.81458	8.24764		-0.566946	-0.566946	2
																						7.52723	7.52723	7.1003		-0.426933	-0.426933	2
																						6.36521	6.36521	6.04853		-0.316675	-0.316675	2
																						5.33559	5.33559	5.10354		-0.232049	-0.232049	2
																						23.79	23.79	20.1573		-3.6327	-3.6327	2
																						22.8827	22.8827	19.4959		-3.38678	-3.38678	2
																						21.8415	21.8415	18.7278		-3.11365	-3.11365	2
																						20.666	20.666	17.8488		-2.8172	-2.8172	2
																						19.3634	19.3634	16.8597		-2.50374	-2.50374	2
																						17.9492	17.9492	15.7674		-2.18178	-2.18178	2
																						16.4476	16.4476	14.5862		-1.86142	-1.86142	2
																						14.8905	14.8905	13.3372		-1.55326	-1.55326	2
																						13.3148	13.3148	12.0478		-1.26708	-1.26708	2
																						11.7594	11.7594	10.7487		-1.01069	-1.01069	2
																						10.261	10.261	9.47208		-0.788969	-0.788969	2
																						8.85128	8.85128	8.2476		-0.603679	-0.603679	2
																						7.55398	7.55398	7.10027		-0.453711	-0.453711	2
																						6.38432	6.38432	6.0485		-0.335819	-0.335819	2
																						5.34902	5.34902	5.10352		-0.245499	-0.245499	2
[truncated: 54 more columns]

## Sheet: Partial Uncompetitive
																	((V_max+(V2*[I])/K_i )*[S])/(K_s+((1+[I])/K_i )*[S] )						Calculated values
		No Inhibitor	[I]1	[I]2	[I]3	[I]4	[I]5	[I]6	[I]7	[I]8	[I]9	[I]10	[I]11	[I]12	[I]13	[I]14	[I]15			0.132514	#DIV/0!	1	No Inhibitor	[I]1	[I]2	[I]3	[I]4	[I]5	[I]6	[I]7	[I]8	[I]9	[I]10	[I]11	[I]12	[I]13	[I]14	[I]15
		0	0.0439805	0.0549756	0.0687195	0.0858993	0.107374	0.134218	0.167772	0.209715	0.262144	0.32768	0.4096	0.512	0.64	0.8	1	Km	Vmax	Ki	V2	0	0	0.0439805	0.0549756	0.0687195	0.0858993	0.107374	0.134218	0.167772	0.209715	0.262144	0.32768	0.4096	0.512	0.64	0.8	1
[S]1	1	13.6364	16.6997	17.2238	17.7926	18.3964	19.0224	19.6557	20.2806	20.8825	21.4487	21.9695	22.439	22.8545	23.2162	23.5267	23.79	0.132514	14.2334	1.57591	28.1905		18.5555	18.8937	18.9746	19.0738	19.1947	19.3415	19.5184	19.7298	19.9799	20.2726	20.6103	20.994	21.4222	21.8908	22.3926	22.9175		18.5555	18.8937	18.9746	19.0738	19.1947	19.3415	19.5184	19.7298	19.9799	20.2726
[S]2	0.8	13.3333	16.2475	16.7432	17.2802	17.8492	18.4379	19.0322	19.6175	20.1802	20.7084	21.1935	21.6301	22.0159	22.3514	22.639	22.8827						17.7873	18.1379	18.2219	18.3249	18.4508	18.6036	18.788	19.0089	19.2707	19.5777	19.933	20.3379	20.7914	21.2896	21.8253	22.3884		17.7873	18.1379	18.2219	18.3249	18.4508	18.6036	18.788	19.0089	19.2707	19.5777
[S]3	0.64	12.973	15.7156	16.1788	16.6797	17.2092	17.7558	18.3063	18.8473	19.366	19.8519	20.2973	20.6974	21.0504	21.3569	21.6194	21.8415						16.9121	17.2741	17.361	17.4677	17.5981	17.7568	17.9485	18.1786	18.452	18.7734	19.1465	19.5733	20.0533	20.583	21.1555	21.7603		16.9121	17.2741	17.361	17.4677	17.5981	17.7568	17.9485	18.1786	18.452	18.7734
[S]4	0.512	12.549	15.0977	15.5247	15.9854	16.4711	16.9711	17.4733	17.9655	18.4362	18.8761	19.2783	19.6389	19.9564	20.2317	20.4671	20.666						15.9322	16.3035	16.3929	16.5027	16.6371	16.8008	16.9991	17.2374	17.5214	17.8564	18.2466	18.6948	19.2013	19.7631	20.3739	21.0231		15.9322	16.3035	16.3929	16.5027	16.6371	16.8008	16.9991	17.2374	17.5214	17.8564
[S]5	0.4096	12.0565	14.3904	14.7779	15.1947	15.6329	16.0826	16.533	16.9729	17.3924	17.7834	18.1399	18.4588	18.7391	18.9816	19.1886	19.3634						14.8562	15.2336	15.3247	15.4367	15.574	15.7415	15.9448	16.1897	16.4824	16.8288	17.2341	17.7017	18.2329	18.8258	19.4745	20.169		14.8562	15.2336	15.3247	15.4367	15.574	15.7415	15.9448	16.1897	16.4824	16.8288
[S]6	0.32768	11.4927	13.5944	13.9397	14.3099	14.6979	15.0948	15.4908	15.8764	16.2429	16.5834	16.893	17.1693	17.4115	17.6206	17.7989	17.9492						13.6997	14.0787	14.1704	14.2834	14.422	14.5915	14.7976	15.0465	15.345	15.6996	16.1162	16.5994	17.1516	17.7721	18.456	19.1942		13.6997	14.0787	14.1704	14.2834	14.422	14.5915	14.7976	15.0465	15.345	15.6996
[S]7	0.262144	10.858	12.7152	13.0168	13.3391	13.6756	14.0185	14.3595	14.6902	15.0034	15.2934	15.5564	15.7903	15.995	16.1713	16.3213	16.4476						12.4848	12.8601	12.9511	13.0634	13.2014	13.3705	13.5765	13.8261	14.1264	14.4846	14.9074	15.4007	15.968	16.61	17.3236	18.1007		12.4848	12.8601	12.9511	13.0634	13.2014	13.3705	13.5765	13.8261	14.1264	14.4846
[S]8	0.209715	10.1568	11.7642	12.0219	12.2963	12.5816	12.8713	13.1582	13.4353	13.6969	13.9382	14.1563	14.3497	14.5185	14.6637	14.7869	14.8905			Sum R2	287.72		11.2389	11.6044	11.6934	11.8032	11.9384	12.1044	12.3071	12.5534	12.8508	13.207	13.6296	14.1255	14.6999	15.355	16.0896	16.8974		11.2389	11.6044	11.6934	11.8032	11.9384	12.1044	12.3071	12.5534	12.8508	13.207
[S]9	0.167772	9.39822	10.7584	10.9735	11.2016	11.438	11.6769	11.9125	12.1392	12.3523	12.5482	12.7247	12.8808	13.0166	13.1332	13.232	13.3148			Sum residuals %	18.3545		9.99252	10.3422	10.4275	10.5331	10.6632	10.8233	11.0192	11.2581	11.5474	11.8955	12.3106	12.8007	13.3724	14.0299	14.774	15.601		9.99252	10.3422	10.4275	10.5331	10.6632	10.8233	11.0192	11.2581	11.5474	11.8955
[S]10	0.134218	8.5957	9.71958	9.89481	10.0799	10.2709	10.4632	10.6519	10.8328	11.0022	11.1574	11.2967	11.4196	11.5262	11.6175	11.6947	11.7594						8.77593	9.10435	9.18473	9.28425	9.4072	9.55866	9.74458	9.97182	10.2481	10.5819	10.9821	11.4575	12.016	12.6638	13.4041	14.2357		8.77593	9.10435	9.18473	9.28425	9.4072	9.55866	9.74458	9.97182	10.2481	10.5819
[S]11	0.107374	7.7667	8.67282	8.81207	8.9586	9.10914	9.26003	9.40757	9.5484	9.67975	9.79965	9.90696	10.0013	10.083	10.1528	10.2118	10.261						7.61675	7.91949	7.99379	8.0859	8.19986	8.34051	8.51356	8.72568	8.98448	9.29846	9.67679	10.1289	10.6639	11.2897	12.0118	12.8321		7.61675	7.91949	7.99379	8.0859	8.19986	8.34051	8.51356	8.72568	8.98448	9.29846
[S]12	0.0858993	6.93112	7.64381	7.75177	7.86494	7.98072	8.09631	8.20887	8.31589	8.41535	8.50582	8.58655	8.65735	8.7185	8.77063	8.81458	8.85128						6.53739	6.81143	6.87886	6.96255	7.06624	7.19444	7.35253	7.54681	7.78463	8.07431	8.42504	8.84663	9.34898	9.94138	10.6315	11.424		6.53739	6.81143	6.87886	6.96255	7.06624	7.19444	7.35253	7.54681	7.78463	8.07431
[S]13	0.0687195	6.1095	6.65658	6.7383	6.82365	6.91064	6.99713	7.08105	7.16054	7.23416	7.30092	7.36032	7.41227	7.45706	7.49516	7.52723	7.55398						5.55363	5.79748	5.85762	5.93234	6.02505	6.13985	6.28169	6.45645	6.67101	6.93333	7.25237	7.63795	8.10041	8.65001	9.29613	10.0461		5.55363	5.79748	5.85762	5.93234	6.02505	6.13985	6.28169	6.45645	6.67101	6.93333
[S]14	0.0549756	5.32106	5.7313	5.79178	5.85472	5.91864	5.98198	6.0432	6.10101	6.15437	6.20262	6.24544	6.28281	6.31495	6.34226	6.36521	6.38432						4.67437	4.88795	4.94074	5.00639	5.08793	5.18906	5.31423	5.46879	5.65907	5.8925	6.17756	6.52381	6.94159	7.44169	8.03466	8.72986		4.67437	4.88795	4.94074	5.00639	5.08793	5.18906	5.31423	5.46879	5.65907	5.8925
[S]15	0.0439805	4.58192	4.88288	4.92671	4.97218	5.01821	5.06367	5.10747	5.1487	5.18665	5.22088	5.25118	5.27757	5.30024	5.31946	5.33559	5.34902						3.90214	4.08656	4.13223	4.18907	4.25975	4.34751	4.45631	4.59093	4.75707	4.96148	5.21203	5.51772	5.88858	6.33544	6.86945	7.50135		3.90214	4.08656	4.13223	4.18907	4.25975	4.34751	4.45631	4.59093	4.75707	4.96148
	1	1	1	1	1	1	1	1	1	1	1	1	1	1	1	1	1																					1	1	18.5555	18.8937	18.9746	19.0738	19.1947	19.3415	19.5184	19.7298	19.9799	20.2726
	1	1	1	1	1	1	1	1	1	1	1	1	1	1	1	1	1					13.6364	13.6364	18.5555		4.91914	4.91914	3										0.8	0.8	17.7873	18.1379	18.2219	18.3249	18.4508	18.6036	18.788	19.0089	19.2707	19.5777
	1	1	1	1	1	1	1	1	1	1	1	1	1	1	1	1	1					13.3333	13.3333	17.7873		4.45396	4.45396	3										0.64	0.64	16.9121	17.2741	17.361	17.4677	17.5981	17.7568	17.9485	18.1786	18.452	18.7734
	1	1	1	1	1	1	1	1	1	1	1	1	1	1	1	1	1					12.973	12.973	16.9121		3.93911	3.93911	3										0.512	0.512	15.9322	16.3035	16.3929	16.5027	16.6371	16.8008	16.9991	17.2374	17.5214	17.8564
	1	1	1	1	1	1	1	1	1	1	1	1	1	1	1	1	1					12.549	12.549	15.9322		3.38315	3.38315	3										0.4096	0.4096	14.8562	15.2336	15.3247	15.4367	15.574	15.7415	15.9448	16.1897	16.4824	16.8288
	1	1	1	1	1	1	1	1	1	1	1	1	1	1	1	1	1					12.0565	12.0565	14.8562		2.79967	2.79967	3										0.32768	0.32768	13.6997	14.0787	14.1704	14.2834	14.422	14.5915	14.7976	15.0465	15.345	15.6996
	1	1	1	1	1	1	1	1	1	1	1	1	1	1	1	1	1					11.4927	11.4927	13.6997		2.20696	2.20696	3										0.262144	0.262144	12.4848	12.8601	12.9511	13.0634	13.2014	13.3705	13.5765	13.8261	14.1264	14.4846
	1	1	1	1	1	1	1	1	1	1	1	1	1	1	1	1	1					10.858	10.858	12.4848		1.62678	1.62678	3										0.209715	0.209715	11.2389	11.6044	11.6934	11.8032	11.9384	12.1044	12.3071	12.5534	12.8508	13.207
	1	1	1	1	1	1	1	1	1	1	1	1	1	1	1	1	1					10.1568	10.1568	11.2389		1.0821	1.0821	3										0.167772	0.167772	9.99252	10.3422	10.4275	10.5331	10.6632	10.8233	11.0192	11.2581	11.5474	11.8955
	1	1	1	1	1	1	1	1	1	1	1	1	1	1	1	1	1					9.39822	9.39822	9.99252		0.594293	0.594293	3										0.134218	0.134218	8.77593	9.10435	9.18473	9.28425	9.4072	9.55866	9.74458	9.97182	10.2481	10.5819
	1	1	1	1	1	1	1	1	1	1	1	1	1	1	1	1	1					8.5957	8.5957	8.77593		0.180225	0.180225	3										0.107374	0.107374	7.61675	7.91949	7.99379	8.0859	8.19986	8.34051	8.51356	8.72568	8.98448	9.29846
	1	1	1	1	1	1	1	1	1	1	1	1	1	1	1	1	1					7.7667	7.7667	7.61675		-0.149944	-0.149944	3										0.0858993	0.0858993	6.53739	6.81143	6.87886	6.96255	7.06624	7.19444	7.35253	7.54681	7.78463	8.07431
	1	1	1	1	1	1	1	1	1	1	1	1	1	1	1	1	1					6.93112	6.93112	6.53739		-0.393732	-0.393732	3										0.0687195	0.0687195	5.55363	5.79748	5.85762	5.93234	6.02505	6.13985	6.28169	6.45645	6.67101	6.93333
	1	1	1	1	1	1	1	1	1	1	1	1	1	1	1	1	1					6.1095	6.1095	5.55363		-0.555872	-0.555872	3										0.0549756	0.0549756	4.67437	4.88795	4.94074	5.00639	5.08793	5.18906	5.31423	5.46879	5.65907	5.8925
	1	1	1	1	1	1	1	1	1	1	1	1	1	1	1	1	1					5.32106	5.32106	4.67437		-0.646682	-0.646682	3										0.0439805	0.0439805	3.90214	4.08656	4.13223	4.18907	4.25975	4.34751	4.45631	4.59093	4.75707	4.96148
																						4.58192	4.58192	3.90214		-0.679785	-0.679785	3
																						16.6997	16.6997	18.8937		2.19402	2.19402	3											1	0.0538924	0.0529276	0.052702	0.052428	0.0520976	0.0517023	0.0512338	0.0506848	0.0500502	0.0493277
																						16.2475	16.2475	18.1379		1.89039	1.89039	3											1.25	0.0562199	0.0551332	0.0548791	0.0545705	0.0541983	0.053753	0.0532253	0.0526071	0.0518923	0.0510785
																						15.7156	15.7156	17.2741		1.55853	1.55853	3											1.5625	0.0591293	0.0578902	0.0576004	0.0572486	0.0568243	0.0563165	0.0557148	0.0550098	0.0541948	0.0532669
																						15.0977	15.0977	16.3035		1.20585	1.20585	3											1.95312	0.0627661	0.0613365	0.0610022	0.0605963	0.0601067	0.0595209	0.0588267	0.0580133	0.057073	0.0560024
																						14.3904	14.3904	15.2336		0.843177	0.843177	3											2.44141	0.067312	0.0656443	0.0652543	0.0647808	0.0642097	0.0635263	0.0627165	0.0617676	0.0606707	0.0594218
																						13.5944	13.5944	14.0787		0.484316	0.484316	3											3.05176	0.0729945	0.0710291	0.0705695	0.0700115	0.0693384	0.0685331	0.0675787	0.0664606	0.0651678	0.063696
																						12.7152	12.7152	12.8601		0.144836	0.144836	3											3.8147	0.0800975	0.0777601	0.0772136	0.0765499	0.0757494	0.0747916	0.0736566	0.0723267	0.0707892	0.0690389
																						11.7642	11.7642	11.6044		-0.15975	-0.15975	3											4.76837	0.0889764	0.0861739	0.0855186	0.0847228	0.0837631	0.0826147	0.0812538	0.0796594	0.077816	0.0757174
																						10.7584	10.7584	10.3422		-0.416142	-0.416142	3											5.96046	0.100075	0.0966911	0.0958998	0.094939	0.0937802	0.0923936	0.0907504	0.0888253	0.0865995	0.0840655
																						9.71958	9.71958	9.10435		-0.615229	-0.615229	3											7.45058	0.113948	0.109838	0.108876	0.107709	0.106302	0.104617	0.102621	0.100283	0.0975788	0.0945007
																						8.67282	8.67282	7.91949		-0.753328	-0.753328	3											9.31323	0.13129	0.126271	0.125097	0.123672	0.121953	0.119897	0.11746	0.114604	0.111303	0.107545
																						7.64381	7.64381	6.81143		-0.832385	-0.832385	3											11.6415	0.152966	0.146812	0.145373	0.143626	0.141518	0.138996	0.136008	0.132506	0.128458	0.12385
																						6.65658	6.65658	5.79748		-0.859103	-0.859103	3											14.5519	0.180062	0.172489	0.170718	0.168567	0.165974	0.16287	0.159193	0.154884	0.149902	0.144231
																						5.7313	5.7313	4.88795		-0.84335	-0.84335	3											18.1899	0.213932	0.204585	0.202399	0.199745	0.196544	0.192713	0.188174	0.182856	0.176707	0.169707
																						4.88288	4.88288	4.08656		-0.796326	-0.796326	3											22.7374	0.25627	0.244705	0.242	0.238717	0.234756	0.230017	0.224401	0.217821	0.210214	0.201553
																						17.2238	17.2238	18.9746		1.75084	1.75084	3
																						16.7432	16.7432	18.2219		1.47873	1.47873	3												13.6364	16.6997	17.2238	17.7926	18.3964	19.0224	19.6557	20.2806	20.8825	21.4487
																						16.1788	16.1788	17.361		1.18216	1.18216	3												13.3333	16.2475	16.7432	17.2802	17.8492	18.4379	19.0322	19.6175	20.1802	20.7084
																						15.5247	15.5247	16.3929		0.868136	0.868136	3												12.973	15.7156	16.1788	16.6797	17.2092	17.7558	18.3063	18.8473	19.366	19.8519
																						14.7779	14.7779	15.3247		0.546749	0.546749	3												12.549	15.0977	15.5247	15.9854	16.4711	16.9711	17.4733	17.9655	18.4362	18.8761
																						13.9397	13.9397	14.1704		0.23073	0.23073	3												12.0565	14.3904	14.7779	15.1947	15.6329	16.0826	16.533	16.9729	17.3924	17.7834
																						13.0168	13.0168	12.9511		-0.0656918	-0.0656918	3												11.4927	13.5944	13.9397	14.3099	14.6979	15.0948	15.4908	15.8764	16.2429	16.5834
																						12.0219	12.0219	11.6934		-0.328506	-0.328506	3												10.858	12.7152	13.0168	13.3391	13.6756	14.0185	14.3595	14.6902	15.0034	15.2934
																						10.9735	10.9735	10.4275		-0.545907	-0.545907	3												10.1568	11.7642	12.0219	12.2963	12.5816	12.8713	13.1582	13.4353	13.6969	13.9382
																						9.89481	9.89481	9.18473		-0.710081	-0.710081	3												9.39822	10.7584	10.9735	11.2016	11.438	11.6769	11.9125	12.1392	12.3523	12.5482
																						8.81207	8.81207	7.99379		-0.818278	-0.818278	3												8.5957	9.71958	9.89481	10.0799	10.2709	10.4632	10.6519	10.8328	11.0022	11.1574
																						7.75177	7.75177	6.87886		-0.872915	-0.872915	3												7.7667	8.67282	8.81207	8.9586	9.10914	9.26003	9.40757	9.5484	9.67975	9.79965
																						6.7383	6.7383	5.85762		-0.880685	-0.880685	3												6.93112	7.64381	7.75177	7.86494	7.98072	8.09631	8.20887	8.31589	8.41535	8.50582
																						5.79178	5.79178	4.94074		-0.851042	-0.851042	3												6.1095	6.65658	6.7383	6.82365	6.91064	6.99713	7.08105	7.16054	7.23416	7.30092
																						4.92671	4.92671	4.13223		-0.794489	-0.794489	3												5.32106	5.7313	5.79178	5.85472	5.91864	5.98198	6.0432	6.10101	6.15437	6.20262
																						17.7926	17.7926	19.0738		1.28115	1.28115	3												4.58192	4.88288	4.92671	4.97218	5.01821	5.06367	5.10747	5.1487	5.18665	5.22088
																						17.2802	17.2802	18.3249		1.04473	1.04473	3
																						16.6797	16.6797	17.4677		0.787958	0.787958	3												1/s	0	0.0439805	0.0549756	0.0687195	0.0858993	0.107374	0.134218	0.167772	0.209715
																						15.9854	15.9854	16.5027		0.517308	0.517308	3											1	1	0.0538924	0.0529276	0.052702	0.052428	0.0520976	0.0517023	0.0512338	0.0506848	0.0500502
																						15.1947	15.1947	15.4367		0.241975	0.241975	3											2	1.25	0.0562199	0.0551332	0.0548791	0.0545705	0.0541983	0.053753	0.0532253	0.0526071	0.0518923
																						14.3099	14.3099	14.2834		-0.0265812	-0.0265812	3											3	1.5625	0.0591293	0.0578902	0.0576004	0.0572486	0.0568243	0.0563165	0.0557148	0.0550098	0.0541948
																						13.3391	13.3391	13.0634		-0.275695	-0.275695	3											4	1.95312	0.0627661	0.0613365	0.0610022	0.0605963	0.0601067	0.0595209	0.0588267	0.0580133	0.057073
																						12.2963	12.2963	11.8032		-0.493065	-0.493065	3											5	2.44141	0.067312	0.0656443	0.0652543	0.0647808	0.0642097	0.0635263	0.0627165	0.0617676	0.0606707
																						11.2016	11.2016	10.5331		-0.668539	-0.668539	3											6	3.05176	0.0729945	0.0710291	0.0705695	0.0700115	0.0693384	0.0685331	0.0675787	0.0664606	0.0651678
																						10.0799	10.0799	9.28425		-0.795688	-0.795688	3											7	3.8147	0.0800975	0.0777601	0.0772136	0.0765499	0.0757494	0.0747916	0.0736566	0.0723267	0.0707892
																						8.9586	8.9586	8.0859		-0.872701	-0.872701	3											8	4.76837	0.0889764	0.0861739	0.0855186	0.0847228	0.0837631	0.0826147	0.0812538	0.0796594	0.077816
																						7.86494	7.86494	6.96255		-0.902388	-0.902388	3											9	5.96046	0.100075	0.0966911	0.0958998	0.094939	0.0937802	0.0923936	0.0907504	0.0888253	0.0865995
																						6.82365	6.82365	5.93234		-0.891305	-0.891305	3											10	7.45058	0.113948	0.109838	0.108876	0.107709	0.106302	0.104617	0.102621	0.100283	0.0975788
																						5.85472	5.85472	5.00639		-0.848332	-0.848332	3											11	9.31323	0.13129	0.126271	0.125097	0.123672	0.121953	0.119897	0.11746	0.114604	0.111303
																						4.97218	4.97218	4.18907		-0.783115	-0.783115	3											12	11.6415	0.152966	0.146812	0.145373	0.143626	0.141518	0.138996	0.136008	0.132506	0.128458
																						18.3964	18.3964	19.1947		0.798308	0.798308	3											13	14.5519	0.180062	0.172489	0.170718	0.168567	0.165974	0.16287	0.159193	0.154884	0.149902
																						17.8492	17.8492	18.4508		0.601584	0.601584	3											14	18.1899	0.213932	0.204585	0.202399	0.199745	0.196544	0.192713	0.188174	0.182856	0.176707
																						17.2092	17.2092	17.5981		0.388889	0.388889	3											15	22.7374	0.25627	0.244705	0.242	0.238717	0.234756	0.230017	0.224401	0.217821	0.210214
																						16.4711	16.4711	16.6371		0.166024	0.166024	3
																						15.6329	15.6329	15.574		-0.0589041	-0.0589041	3
																						14.6979	14.6979	14.422		-0.275924	-0.275924	3
																						13.6756	13.6756	13.2014		-0.474158	-0.474158	3
																						12.5816	12.5816	11.9384		-0.643213	-0.643213	3
																						11.438	11.438	10.6632		-0.774732	-0.774732	3
																						10.2709	10.2709	9.4072		-0.863723	-0.863723	3
																						9.10914	9.10914	8.19986		-0.909277	-0.909277	3
																						7.98072	7.98072	7.06624		-0.914482	-0.914482	3
																						6.91064	6.91064	6.02505		-0.885588	-0.885588	3
																						5.91864	5.91864	5.08793		-0.830712	-0.830712	3
																						5.01821	5.01821	4.25975		-0.758466	-0.758466	3
																						19.0224	19.0224	19.3415		0.319099	0.319099	3
																						18.4379	18.4379	18.6036		0.165737	0.165737	3
																						17.7558	17.7558	17.7568		0.000957716	0.000957716	3
																						16.9711	16.9711	16.8008		-0.170263	-0.170263	3
																						16.0826	16.0826	15.7415		-0.341107	-0.341107	3
																						15.0948	15.0948	14.5915		-0.503318	-0.503318	3
																						14.0185	14.0185	13.3705		-0.648033	-0.648033	3
																						12.8713	12.8713	12.1044		-0.76695	-0.76695	3
																						11.6769	11.6769	10.8233		-0.853619	-0.853619	3
																						10.4632	10.4632	9.55866		-0.904503	-0.904503	3
																						9.26003	9.26003	8.34051		-0.919515	-0.919515	3
																						8.09631	8.09631	7.19444		-0.901863	-0.901863	3
																						6.99713	6.99713	6.13985		-0.857283	-0.857283	3
																						5.98198	5.98198	5.18906		-0.792918	-0.792918	3
																						5.06367	5.06367	4.34751		-0.716157	-0.716157	3
																						19.6557	19.6557	19.5184		-0.137301	-0.137301	3
																						19.0322	19.0322	18.788		-0.244154	-0.244154	3
																						18.3063	18.3063	17.9485		-0.357797	-0.357797	3
																						17.4733	17.4733	16.9991		-0.474247	-0.474247	3
																						16.533	16.533	15.9448		-0.588183	-0.588183	3
																						15.4908	15.4908	14.7976		-0.69329	-0.69329	3
																						14.3595	14.3595	13.5765		-0.782933	-0.782933	3
																						13.1582	13.1582	12.3071		-0.85107	-0.85107	3
																						11.9125	11.9125	11.0192		-0.893242	-0.893242	3
																						10.6519	10.6519	9.74458		-0.90735	-0.90735	3
																						9.40757	9.40757	8.51356		-0.894007	-0.894007	3
																						8.20887	8.20887	7.35253		-0.856347	-0.856347	3
																						7.08105	7.08105	6.28169		-0.799358	-0.799358	3
																						6.0432	6.0432	5.31423		-0.728975	-0.728975	3
																						5.10747	5.10747	4.45631		-0.651157	-0.651157	3
																						20.2806	20.2806	19.7298		-0.55088	-0.55088	3
																						19.6175	19.6175	19.0089		-0.608696	-0.608696	3
																						18.8473	18.8473	18.1786		-0.668698	-0.668698	3
																						17.9655	17.9655	17.2374		-0.728068	-0.728068	3
																						16.9729	16.9729	16.1897		-0.783188	-0.783188	3
																						15.8764	15.8764	15.0465		-0.829905	-0.829905	3
																						14.6902	14.6902	13.8261		-0.864017	-0.864017	3
																						13.4353	13.4353	12.5534		-0.881893	-0.881893	3
																						12.1392	12.1392	11.2581		-0.881125	-0.881125	3
																						10.8328	10.8328	9.97182		-0.861011	-0.861011	3
																						9.5484	9.5484	8.72568		-0.822718	-0.822718	3
																						8.31589	8.31589	7.54681		-0.769084	-0.769084	3
																						7.16054	7.16054	6.45645		-0.704095	-0.704095	3
																						6.10101	6.10101	5.46879		-0.632219	-0.632219	3
																						5.1487	5.1487	4.59093		-0.557769	-0.557769	3
																						20.8825	20.8825	19.9799		-0.902586	-0.902586	3
																						20.1802	20.1802	19.2707		-0.909463	-0.909463	3
																						19.366	19.366	18.452		-0.914019	-0.914019	3
																						18.4362	18.4362	17.5214		-0.914766	-0.914766	3
																						17.3924	17.3924	16.4824		-0.909987	-0.909987	3
																						16.2429	16.2429	15.345		-0.897908	-0.897908	3
																						15.0034	15.0034	14.1264		-0.87695	-0.87695	3
																						13.6969	13.6969	12.8508		-0.846037	-0.846037	3
																						12.3523	12.3523	11.5474		-0.804869	-0.804869	3
																						11.0022	11.0022	10.2481		-0.754088	-0.754088	3
																						9.67975	9.67975	8.98448		-0.695268	-0.695268	3
																						8.41535	8.41535	7.78463		-0.630718	-0.630718	3
																						7.23416	7.23416	6.67101		-0.563148	-0.563148	3
																						6.15437	6.15437	5.65907		-0.495292	-0.495292	3
																						5.18665	5.18665	4.75707		-0.429583	-0.429583	3
																						21.4487	21.4487	20.2726		-1.17608	-1.17608	3
																						20.7084	20.7084	19.5777		-1.13065	-1.13065	3
																						19.8519	19.8519	18.7734		-1.07852	-1.07852	3
																						18.8761	18.8761	17.8564		-1.01969	-1.01969	3
																						17.7834	17.7834	16.8288		-0.954516	-0.954516	3
																						16.5834	16.5834	15.6996		-0.883812	-0.883812	3
																						15.2934	15.2934	14.4846		-0.808817	-0.808817	3
																						13.9382	13.9382	13.207		-0.731156	-0.731156	3
																						12.5482	12.5482	11.8955		-0.652709	-0.652709	3
																						11.1574	11.1574	10.5819		-0.575437	-0.575437	3
																						9.79965	9.79965	9.29846		-0.501185	-0.501185	3
																						8.50582	8.50582	8.07431		-0.431514	-0.431514	3
																						7.30092	7.30092	6.93333		-0.367587	-0.367587	3
																						6.20262	6.20262	5.8925		-0.310119	-0.310119	3
																						5.22088	5.22088	4.96148		-0.2594	-0.2594	3
																						21.9695	21.9695	20.6103		-1.35921	-1.35921	3
																						21.1935	21.1935	19.933		-1.26048	-1.26048	3
																						20.2973	20.2973	19.1465		-1.15077	-1.15077	3
																						19.2783	19.2783	18.2466		-1.03169	-1.03169	3
																						18.1399	18.1399	17.2341		-0.905865	-0.905865	3
																						16.893	16.893	16.1162		-0.776866	-0.776866	3
																						15.5564	15.5564	14.9074		-0.648952	-0.648952	3
																						14.1563	14.1563	13.6296		-0.526624	-0.526624	3
																						12.7247	12.7247	12.3106		-0.414059	-0.414059	3
																						11.2967	11.2967	10.9821		-0.31456	-0.31456	3
																						9.90696	9.90696	9.67679		-0.230166	-0.230166	3
																						8.58655	8.58655	8.42504		-0.161508	-0.161508	3
																						7.36032	7.36032	7.25237		-0.107943	-0.107943	3
																						6.24544	6.24544	6.17756		-0.0678726	-0.0678726	3
																						5.25118	5.25118	5.21203		-0.0391511	-0.0391511	3
																						22.439	22.439	20.994		-1.44503	-1.44503	3
																						21.6301	21.6301	20.3379		-1.29216	-1.29216	3
																						20.6974	20.6974	19.5733		-1.12407	-1.12407	3
																						19.6389	19.6389	18.6948		-0.944062	-0.944062	3
																						18.4588	18.4588	17.7017		-0.757154	-0.757154	3
																						17.1693	17.1693	16.5994		-0.569864	-0.569864	3
																						15.7903	15.7903	15.4007		-0.389679	-0.389679	3
																						14.3497	14.3497	14.1255		-0.224192	-0.224192	3
																						12.8808	12.8808	12.8007		-0.0800614	-0.0800614	3
																						11.4196	11.4196	11.4575		0.0379477	0.0379477	3
																						10.0013	10.0013	10.1289		0.127593	0.127593	3
																						8.65735	8.65735	8.84663		0.18928	0.18928	3
																						7.41227	7.41227	7.63795		0.225679	0.225679	3
																						6.28281	6.28281	6.52381		0.240999	0.240999	3
																						5.27757	5.27757	5.51772		0.240146	0.240146	3
																						22.8545	22.8545	21.4222		-1.43228	-1.43228	3
																						22.0159	22.0159	20.7914		-1.22446	-1.22446	3
																						21.0504	21.0504	20.0533		-0.997051	-0.997051	3
																						19.9564	19.9564	19.2013		-0.755122	-0.755122	3
																						18.7391	18.7391	18.2329		-0.506173	-0.506173	3
																						17.4115	17.4115	17.1516		-0.259824	-0.259824	3
																						15.995	15.995	15.968		-0.0270062	-0.0270062	3
																						14.5185	14.5185	14.6999		0.181329	0.181329	3
																						13.0166	13.0166	13.3724		0.35576	0.35576	3
																						11.5262	11.5262	12.016		0.489818	0.489818	3
																						10.083	10.083	10.6639		0.580912	0.580912	3
																						8.7185	8.7185	9.34898		0.630477	0.630477	3
																						7.45706	7.45706	8.10041		0.643353	0.643353	3
																						6.31495	6.31495	6.94159		0.626636	0.626636	3
																						5.30024	5.30024	5.88858		0.588345	0.588345	3
																						23.2162	23.2162	21.8908		-1.32544	-1.32544	3
																						22.3514	22.3514	21.2896		-1.06176	-1.06176	3
																						21.3569	21.3569	20.583		-0.773849	-0.773849	3
																						20.2317	20.2317	19.7631		-0.468525	-0.468525	3
																						18.9816	18.9816	18.8258		-0.155806	-0.155806	3
																						17.6206	17.6206	17.7721		0.151471	0.151471	3
																						16.1713	16.1713	16.61		0.43872	0.43872	3
																						14.6637	14.6637	15.355		0.691324	0.691324	3
																						13.1332	13.1332	14.0299		0.896717	0.896717	3
																						11.6175	11.6175	12.6638		1.04633	1.04633	3
																						10.1528	10.1528	11.2897		1.13691	1.13691	3
																						8.77063	8.77063	9.94138		1.17074	1.17074	3
																						7.49516	7.49516	8.65001		1.15485	1.15485	3
																						6.34226	6.34226	7.44169		1.09943	1.09943	3
																						5.31946	5.31946	6.33544		1.01598	1.01598	3
																						23.5267	23.5267	22.3926		-1.13418	-1.13418	3
																						22.639	22.639	21.8253		-0.813691	-0.813691	3
																						21.6194	21.6194	21.1555		-0.463875	-0.463875	3
																						20.4671	20.4671	20.3739		-0.0932036	-0.0932036	3
																						19.1886	19.1886	19.4745		0.285826	0.285826	3
																						17.7989	17.7989	18.456		0.657115	0.657115	3
																						16.3213	16.3213	17.3236		1.00225	1.00225	3
																						14.7869	14.7869	16.0896		1.30263	1.30263	3
																						13.232	13.232	14.774		1.54207	1.54207	3
																						11.6947	11.6947	13.4041		1.70937	1.70937	3
																						10.2118	10.2118	12.0118		1.80006	1.80006	3
																						8.81458	8.81458	10.6315		1.81689	1.81689	3
																						7.52723	7.52723	9.29613		1.7689	1.7689	3
																						6.36521	6.36521	8.03466		1.66946	1.66946	3
																						5.33559	5.33559	6.86945		1.53385	1.53385	3
																						23.79	23.79	22.9175		-0.872474	-0.872474	3
																						22.8827	22.8827	22.3884		-0.494341	-0.494341	3
																						21.8415	21.8415	21.7603		-0.0811663	-0.0811663	3
																						20.666	20.666	21.0231		0.357094	0.357094	3
																						19.3634	19.3634	20.169		0.805601	0.805601	3
																						17.9492	17.9492	19.1942		1.24505	1.24505	3
																						16.4476	16.4476	18.1007		1.65312	1.65312	3
																						14.8905	14.8905	16.8974		2.00692	2.00692	3
																						13.3148	13.3148	15.601		2.28617	2.28617	3
																						11.7594	11.7594	14.2357		2.47633	2.47633	3
																						10.261	10.261	12.8321		2.57101	2.57101	3
																						8.85128	8.85128	11.424		2.57273	2.57273	3
																						7.55398	7.55398	10.0461		2.49209	2.49209	3
																						6.38432	6.38432	8.72986		2.34554	2.34554	3
																						5.34902	5.34902	7.50135		2.15233	2.15233	3
[truncated: 54 more columns]

## Sheet: partial Mixed Non-competitive
																		(V_max*((1+([I]/(K_i^' ))*(β))*([S]/K_s )))/((1+([I]/(K_i^' )))*(([S]/K_s )+((1+([I]/(K_i^' ))*((K_s^')/K_s )))/((1+([I]/(K_i^' ))) )) )					Calculated values
		No Inhibitor	[I]1	[I]2	[I]3	[I]4	[I]5	[I]6	[I]7	[I]8	[I]9	[I]10	[I]11	[I]12	[I]13	[I]14	[I]15	Ks			Ks'		No Inhibitor	[I]1	[I]2	[I]3	[I]4	[I]5	[I]6	[I]7	[I]8	[I]9	[I]10	[I]11	[I]12	[I]13	[I]14	[I]15
		0	0.0439805	0.0549756	0.0687195	0.0858993	0.107374	0.134218	0.167772	0.209715	0.262144	0.32768	0.4096	0.512	0.64	0.8	1	Km	Vmax	Ki'	Km'	b	0	0.0439805	0.0549756	0.0687195	0.0858993	0.107374	0.134218	0.167772	0.209715	0.262144	0.32768	0.4096	0.512	0.64	0.8	1
[S]1	1	13.6364	16.6997	17.2238	17.7926	18.3964	19.0224	19.6557	20.2806	20.8825	21.4487	21.9695	22.439	22.8545	23.2162	23.5267	23.79	0.0999968	14.9995	0.129981	0.199994	2.00004	13.6359	16.6996	17.2237	17.7926	18.3964	19.0224	19.6557	20.2807	20.8825	21.4486	21.9695	22.4389	22.8544	23.2161	23.5266	23.7898		13.6359	16.6996	17.2237	17.7926	18.3964	19.0224	19.6557	20.2807	20.8825	21.4486
[S]2	0.8	13.3333	16.2475	16.7432	17.2802	17.8492	18.4379	19.0322	19.6175	20.1802	20.7084	21.1935	21.6301	22.0159	22.3514	22.639	22.8827						13.3329	16.2474	16.7431	17.2802	17.8492	18.4379	19.0322	19.6176	20.1802	20.7084	21.1934	21.63	22.0158	22.3513	22.6389	22.8826		13.3329	16.2474	16.7431	17.2802	17.8492	18.4379	19.0322	19.6176	20.1802	20.7084
[S]3	0.64	12.973	15.7156	16.1788	16.6797	17.2092	17.7558	18.3063	18.8473	19.366	19.8519	20.2973	20.6974	21.0504	21.3569	21.6194	21.8415			Sum R2	1.81446e-06		12.9726	15.7155	16.1788	16.6797	17.2092	17.7558	18.3064	18.8473	19.366	19.8519	20.2973	20.6973	21.0503	21.3568	21.6192	21.8413		12.9726	15.7155	16.1788	16.6797	17.2092	17.7558	18.3064	18.8473	19.366	19.8519
[S]4	0.512	12.549	15.0977	15.5247	15.9854	16.4711	16.9711	17.4733	17.9655	18.4362	18.8761	19.2783	19.6389	19.9564	20.2317	20.4671	20.666			Sum residuals %	0.00105599		12.5486	15.0976	15.5247	15.9853	16.4711	16.9711	17.4734	17.9655	18.4362	18.8761	19.2783	19.6388	19.9564	20.2316	20.467	20.6659		12.5486	15.0976	15.5247	15.9853	16.4711	16.9711	17.4734	17.9655	18.4362	18.8761
[S]5	0.4096	12.0565	14.3904	14.7779	15.1947	15.6329	16.0826	16.533	16.9729	17.3924	17.7834	18.1399	18.4588	18.7391	18.9816	19.1886	19.3634						12.0561	14.3904	14.7779	15.1947	15.6329	16.0826	16.533	16.9729	17.3924	17.7834	18.1399	18.4588	18.739	18.9815	19.1886	19.3633		12.0561	14.3904	14.7779	15.1947	15.6329	16.0826	16.533	16.9729	17.3924	17.7834
[S]6	0.32768	11.4927	13.5944	13.9397	14.3099	14.6979	15.0948	15.4908	15.8764	16.2429	16.5834	16.893	17.1693	17.4115	17.6206	17.7989	17.9492						11.4924	13.5944	13.9397	14.3099	14.698	15.0948	15.4909	15.8765	16.2429	16.5834	16.893	17.1693	17.4114	17.6206	17.7989	17.9491		11.4924	13.5944	13.9397	14.3099	14.698	15.0948	15.4909	15.8765	16.2429	16.5834
[S]7	0.262144	10.858	12.7152	13.0168	13.3391	13.6756	14.0185	14.3595	14.6902	15.0034	15.2934	15.5564	15.7903	15.995	16.1713	16.3213	16.4476						10.8577	12.7152	13.0168	13.3391	13.6756	14.0185	14.3595	14.6902	15.0034	15.2934	15.5564	15.7903	15.995	16.1713	16.3213	16.4476		10.8577	12.7152	13.0168	13.3391	13.6756	14.0185	14.3595	14.6902	15.0034	15.2934
[S]8	0.209715	10.1568	11.7642	12.0219	12.2963	12.5816	12.8713	13.1582	13.4353	13.6969	13.9382	14.1563	14.3497	14.5185	14.6637	14.7869	14.8905						10.1566	11.7641	12.0219	12.2963	12.5817	12.8714	13.1582	13.4354	13.6969	13.9382	14.1563	14.3498	14.5185	14.6637	14.7869	14.8905		10.1566	11.7641	12.0219	12.2963	12.5817	12.8714	13.1582	13.4354	13.6969	13.9382
[S]9	0.167772	9.39822	10.7584	10.9735	11.2016	11.438	11.6769	11.9125	12.1392	12.3523	12.5482	12.7247	12.8808	13.0166	13.1332	13.232	13.3148						9.39799	10.7583	10.9734	11.2016	11.438	11.6769	11.9125	12.1392	12.3523	12.5482	12.7247	12.8808	13.0167	13.1332	13.232	13.3148		9.39799	10.7583	10.9734	11.2016	11.438	11.6769	11.9125	12.1392	12.3523	12.5482
[S]10	0.134218	8.5957	9.71958	9.89481	10.0799	10.2709	10.4632	10.6519	10.8328	11.0022	11.1574	11.2967	11.4196	11.5262	11.6175	11.6947	11.7594						8.5955	9.71955	9.8948	10.0799	10.2709	10.4632	10.652	10.8329	11.0023	11.1574	11.2967	11.4196	11.5262	11.6175	11.6947	11.7594		8.5955	9.71955	9.8948	10.0799	10.2709	10.4632	10.652	10.8329	11.0023	11.1574
[S]11	0.107374	7.7667	8.67282	8.81207	8.9586	9.10914	9.26003	9.40757	9.5484	9.67975	9.79965	9.90696	10.0013	10.083	10.1528	10.2118	10.261						7.76653	8.6728	8.81207	8.95861	9.10916	9.26006	9.40761	9.54844	9.67979	9.79969	9.907	10.0014	10.0831	10.1529	10.2118	10.2611		7.76653	8.6728	8.81207	8.95861	9.10916	9.26006	9.40761	9.54844	9.67979	9.79969
[S]12	0.0858993	6.93112	7.64381	7.75177	7.86494	7.98072	8.09631	8.20887	8.31589	8.41535	8.50582	8.58655	8.65735	8.7185	8.77063	8.81458	8.85128						6.93098	7.6438	7.75177	7.86495	7.98075	8.09634	8.20891	8.31594	8.41539	8.50587	8.5866	8.65739	8.71854	8.77068	8.81462	8.85132		6.93098	7.6438	7.75177	7.86495	7.98075	8.09634	8.20891	8.31594	8.41539	8.50587
[S]13	0.0687195	6.1095	6.65658	6.7383	6.82365	6.91064	6.99713	7.08105	7.16054	7.23416	7.30092	7.36032	7.41227	7.45706	7.49516	7.52723	7.55398						6.10939	6.65657	6.73831	6.82366	6.91066	6.99716	7.08109	7.16058	7.2342	7.30096	7.36036	7.41232	7.4571	7.49521	7.52728	7.55402		6.10939	6.65657	6.73831	6.82366	6.91066	6.99716	7.08109	7.16058	7.2342	7.30096
[S]14	0.0549756	5.32106	5.7313	5.79178	5.85472	5.91864	5.98198	6.0432	6.10101	6.15437	6.20262	6.24544	6.28281	6.31495	6.34226	6.36521	6.38432						5.32097	5.7313	5.79178	5.85473	5.91866	5.982	6.04323	6.10104	6.1544	6.20266	6.24548	6.28285	6.31499	6.3423	6.36525	6.38436		5.32097	5.7313	5.79178	5.85473	5.91866	5.982	6.04323	6.10104	6.1544	6.20266
[S]15	0.0439805	4.58192	4.88288	4.92671	4.97218	5.01821	5.06367	5.10747	5.1487	5.18665	5.22088	5.25118	5.27757	5.30024	5.31946	5.33559	5.34902						4.58185	4.88288	4.92672	4.9722	5.01823	5.06369	5.1075	5.14873	5.18668	5.22091	5.25122	5.27761	5.30027	5.3195	5.33563	5.34906		4.58185	4.88288	4.92672	4.9722	5.01823	5.06369	5.1075	5.14873	5.18668	5.22091
	1	1	1	1	1	1	1	1	1	1	1	1	1	1	1	1	1																					1	1	13.6359	16.6996	17.2237	17.7926	18.3964	19.0224	19.6557	20.2807	20.8825	21.4486
	1	1	1	1	1	1	1	1	1	1	1	1	1	1	1	1	1					13.6364	13.6364	13.6359		-0.000458635	-0.000458635	4										0.8	0.8	13.3329	16.2474	16.7431	17.2802	17.8492	18.4379	19.0322	19.6176	20.1802	20.7084
	1	1	1	1	1	1	1	1	1	1	1	1	1	1	1	1	1					13.3333	13.3333	13.3329		-0.000439928	-0.000439928	4										0.64	0.64	12.9726	15.7155	16.1788	16.6797	17.2092	17.7558	18.3064	18.8473	19.366	19.8519
	1	1	1	1	1	1	1	1	1	1	1	1	1	1	1	1	1					12.973	12.973	12.9726		-0.000418185	-0.000418185	4										0.512	0.512	12.5486	15.0976	15.5247	15.9853	16.4711	16.9711	17.4734	17.9655	18.4362	18.8761
	1	1	1	1	1	1	1	1	1	1	1	1	1	1	1	1	1					12.549	12.549	12.5486		-0.000393307	-0.000393307	4										0.4096	0.4096	12.0561	14.3904	14.7779	15.1947	15.6329	16.0826	16.533	16.9729	17.3924	17.7834
	1	1	1	1	1	1	1	1	1	1	1	1	1	1	1	1	1					12.0565	12.0565	12.0561		-0.000365357	-0.000365357	4										0.32768	0.32768	11.4924	13.5944	13.9397	14.3099	14.698	15.0948	15.4909	15.8765	16.2429	16.5834
	1	1	1	1	1	1	1	1	1	1	1	1	1	1	1	1	1					11.4927	11.4927	11.4924		-0.000334615	-0.000334615	4										0.262144	0.262144	10.8577	12.7152	13.0168	13.3391	13.6756	14.0185	14.3595	14.6902	15.0034	15.2934
	1	1	1	1	1	1	1	1	1	1	1	1	1	1	1	1	1					10.858	10.858	10.8577		-0.000301611	-0.000301611	4										0.209715	0.209715	10.1566	11.7641	12.0219	12.2963	12.5817	12.8714	13.1582	13.4354	13.6969	13.9382
	1	1	1	1	1	1	1	1	1	1	1	1	1	1	1	1	1					10.1568	10.1568	10.1566		-0.000267125	-0.000267125	4										0.167772	0.167772	9.39799	10.7583	10.9734	11.2016	11.438	11.6769	11.9125	12.1392	12.3523	12.5482
	1	1	1	1	1	1	1	1	1	1	1	1	1	1	1	1	1					9.39822	9.39822	9.39799		-0.000232147	-0.000232147	4										0.134218	0.134218	8.5955	9.71955	9.8948	10.0799	10.2709	10.4632	10.652	10.8329	11.0023	11.1574
	1	1	1	1	1	1	1	1	1	1	1	1	1	1	1	1	1					8.5957	8.5957	8.5955		-0.000197786	-0.000197786	4										0.107374	0.107374	7.76653	8.6728	8.81207	8.95861	9.10916	9.26006	9.40761	9.54844	9.67979	9.79969
	1	1	1	1	1	1	1	1	1	1	1	1	1	1	1	1	1					7.7667	7.7667	7.76653		-0.000165141	-0.000165141	4										0.0858993	0.0858993	6.93098	7.6438	7.75177	7.86495	7.98075	8.09634	8.20891	8.31594	8.41539	8.50587
	1	1	1	1	1	1	1	1	1	1	1	1	1	1	1	1	1					6.93112	6.93112	6.93098		-0.000135168	-0.000135168	4										0.0687195	0.0687195	6.10939	6.65657	6.73831	6.82366	6.91066	6.99716	7.08109	7.16058	7.2342	7.30096
	1	1	1	1	1	1	1	1	1	1	1	1	1	1	1	1	1					6.1095	6.1095	6.10939		-0.000108566	-0.000108566	4										0.0549756	0.0549756	5.32097	5.7313	5.79178	5.85473	5.91866	5.982	6.04323	6.10104	6.1544	6.20266
	1	1	1	1	1	1	1	1	1	1	1	1	1	1	1	1	1					5.32106	5.32106	5.32097		-8.57129e-05	-8.57129e-05	4										0.0439805	0.0439805	4.58185	4.88288	4.92672	4.9722	5.01823	5.06369	5.1075	5.14873	5.18668	5.22091
																						4.58192	4.58192	4.58185		-6.6669e-05	-6.6669e-05	4
																						16.6997	16.6997	16.6996		-0.000101838	-0.000101838	4											1	0.0733358	0.0598816	0.0580594	0.0562032	0.0543584	0.0525695	0.0508758	0.0493081	0.047887	0.046623
																						16.2475	16.2475	16.2474		-9.53937e-05	-9.53937e-05	4											1.25	0.0750025	0.0615483	0.0597261	0.0578698	0.056025	0.0542362	0.0525425	0.0509747	0.0495536	0.0482897
																						15.7156	15.7156	15.7155		-8.8076e-05	-8.8076e-05	4											1.5625	0.0770858	0.0636316	0.0618094	0.0599532	0.0581084	0.0563195	0.0546258	0.053058	0.0516369	0.050373
																						15.0977	15.0977	15.0976		-7.99326e-05	-7.99326e-05	4											1.95312	0.07969	0.0662358	0.0644136	0.0625573	0.0607125	0.0589237	0.05723	0.0556622	0.0542411	0.0529771
																						14.3904	14.3904	14.3904		-7.10818e-05	-7.10818e-05	4											2.44141	0.0829452	0.069491	0.0676688	0.0658125	0.0639677	0.0621788	0.0604851	0.0589174	0.0574963	0.0562323
																						13.5944	13.5944	13.5944		-6.17204e-05	-6.17204e-05	4											3.05176	0.0870143	0.07356	0.0717378	0.0698815	0.0680367	0.0662478	0.0645541	0.0629864	0.0615652	0.0603013
																						12.7152	12.7152	12.7152		-5.21198e-05	-5.21198e-05	4											3.8147	0.0921005	0.0786462	0.076824	0.0749677	0.0731229	0.0713341	0.0696403	0.0680726	0.0666514	0.0653875
																						11.7642	11.7642	11.7641		-4.2608e-05	-4.2608e-05	4											4.76837	0.0984584	0.085004	0.0831818	0.0813255	0.0794807	0.0776919	0.0759981	0.0744304	0.0730092	0.0717453
																						10.7584	10.7584	10.7583		-3.35356e-05	-3.35356e-05	4											5.96046	0.106406	0.0929513	0.0911291	0.0892728	0.087428	0.0856391	0.0839454	0.0823776	0.0809564	0.0796925
																						9.71958	9.71958	9.71955		-2.52318e-05	-2.52318e-05	4											7.45058	0.11634	0.102885	0.101063	0.0992069	0.097362	0.0955731	0.0938794	0.0923116	0.0908905	0.0896265
																						8.67282	8.67282	8.6728		-1.79594e-05	-1.79594e-05	4											9.31323	0.128758	0.115303	0.113481	0.111624	0.10978	0.107991	0.106297	0.104729	0.103308	0.102044
																						7.64381	7.64381	7.6438		-1.18821e-05	-1.18821e-05	4											11.6415	0.14428	0.130825	0.129003	0.127146	0.125302	0.123513	0.121819	0.120251	0.11883	0.117566
																						6.65658	6.65658	6.65657		-7.05024e-06	-7.05024e-06	4											14.5519	0.163682	0.150227	0.148405	0.146549	0.144704	0.142915	0.141221	0.139653	0.138232	0.136968
																						5.7313	5.7313	5.7313		-3.40948e-06	-3.40948e-06	4											18.1899	0.187936	0.174481	0.172658	0.170802	0.168957	0.167168	0.165474	0.163906	0.162485	0.161221
																						4.88288	4.88288	4.88288		-8.26192e-07	-8.26192e-07	4											22.7374	0.218252	0.204797	0.202975	0.201118	0.199273	0.197484	0.195791	0.194223	0.192801	0.191537
																						17.2238	17.2238	17.2237		-6.48129e-05	-6.48129e-05	4
																						16.7432	16.7432	16.7431		-5.97266e-05	-5.97266e-05	4												13.6364	16.6997	17.2238	17.7926	18.3964	19.0224	19.6557	20.2806	20.8825	21.4487
																						16.1788	16.1788	16.1788		-5.39946e-05	-5.39946e-05	4												13.3333	16.2475	16.7432	17.2802	17.8492	18.4379	19.0322	19.6175	20.1802	20.7084
																						15.5247	15.5247	15.5247		-4.76756e-05	-4.76756e-05	4												12.973	15.7156	16.1788	16.6797	17.2092	17.7558	18.3063	18.8473	19.366	19.8519
																						14.7779	14.7779	14.7779		-4.0887e-05	-4.0887e-05	4												12.549	15.0977	15.5247	15.9854	16.4711	16.9711	17.4733	17.9655	18.4362	18.8761
																						13.9397	13.9397	13.9397		-3.38087e-05	-3.38087e-05	4												12.0565	14.3904	14.7779	15.1947	15.6329	16.0826	16.533	16.9729	17.3924	17.7834
																						13.0168	13.0168	13.0168		-2.66773e-05	-2.66773e-05	4												11.4927	13.5944	13.9397	14.3099	14.6979	15.0948	15.4908	15.8764	16.2429	16.5834
																						12.0219	12.0219	12.0219		-1.97666e-05	-1.97666e-05	4												10.858	12.7152	13.0168	13.3391	13.6756	14.0185	14.3595	14.6902	15.0034	15.2934
																						10.9735	10.9735	10.9734		-1.33568e-05	-1.33568e-05	4												10.1568	11.7642	12.0219	12.2963	12.5816	12.8713	13.1582	13.4353	13.6969	13.9382
																						9.89481	9.89481	9.8948		-7.69666e-06	-7.69666e-06	4												9.39822	10.7584	10.9735	11.2016	11.438	11.6769	11.9125	12.1392	12.3523	12.5482
																						8.81207	8.81207	8.81207		-2.96825e-06	-2.96825e-06	4												8.5957	9.71958	9.89481	10.0799	10.2709	10.4632	10.6519	10.8328	11.0022	11.1574
																						7.75177	7.75177	7.75177		7.36639e-07	7.36639e-07	4												7.7667	8.67282	8.81207	8.9586	9.10914	9.26003	9.40757	9.5484	9.67975	9.79965
																						6.7383	6.7383	6.73831		3.42186e-06	3.42186e-06	4												6.93112	7.64381	7.75177	7.86494	7.98072	8.09631	8.20887	8.31589	8.41535	8.50582
																						5.79178	5.79178	5.79178		5.17409e-06	5.17409e-06	4												6.1095	6.65658	6.7383	6.82365	6.91064	6.99713	7.08105	7.16054	7.23416	7.30092
																						4.92671	4.92671	4.92672		6.1372e-06	6.1372e-06	4												5.32106	5.7313	5.79178	5.85472	5.91864	5.98198	6.0432	6.10101	6.15437	6.20262
																						17.7926	17.7926	17.7926		-3.25661e-05	-3.25661e-05	4												4.58192	4.88288	4.92671	4.97218	5.01821	5.06367	5.10747	5.1487	5.18665	5.22088
																						17.2802	17.2802	17.2802		-2.86061e-05	-2.86061e-05	4
																						16.6797	16.6797	16.6797		-2.41937e-05	-2.41937e-05	4												1/s	0	0.0439805	0.0549756	0.0687195	0.0858993	0.107374	0.134218	0.167772	0.209715
																						15.9854	15.9854	15.9853		-1.93984e-05	-1.93984e-05	4											1	1	0.0733358	0.0598816	0.0580594	0.0562032	0.0543584	0.0525695	0.0508758	0.0493081	0.047887
																						15.1947	15.1947	15.1947		-1.43386e-05	-1.43386e-05	4											2	1.25	0.0750025	0.0615483	0.0597261	0.0578698	0.056025	0.0542362	0.0525425	0.0509747	0.0495536
																						14.3099	14.3099	14.3099		-9.18268e-06	-9.18268e-06	4											3	1.5625	0.0770858	0.0636316	0.0618094	0.0599532	0.0581084	0.0563195	0.0546258	0.053058	0.0516369
																						13.3391	13.3391	13.3391		-4.13971e-06	-4.13971e-06	4											4	1.95312	0.07969	0.0662358	0.0644136	0.0625573	0.0607125	0.0589237	0.05723	0.0556622	0.0542411
																						12.2963	12.2963	12.2963		5.60258e-07	5.60258e-07	4											5	2.44141	0.0829452	0.069491	0.0676688	0.0658125	0.0639677	0.0621788	0.0604851	0.0589174	0.0574963
																						11.2016	11.2016	11.2016		4.69527e-06	4.69527e-06	4											6	3.05176	0.0870143	0.07356	0.0717378	0.0698815	0.0680367	0.0662478	0.0645541	0.0629864	0.0615652
																						10.0799	10.0799	10.0799		8.08395e-06	8.08395e-06	4											7	3.8147	0.0921005	0.0786462	0.076824	0.0749677	0.0731229	0.0713341	0.0696403	0.0680726	0.0666514
																						8.9586	8.9586	8.95861		1.06132e-05	1.06132e-05	4											8	4.76837	0.0984584	0.085004	0.0831818	0.0813255	0.0794807	0.0776919	0.0759981	0.0744304	0.0730092
																						7.86494	7.86494	7.86495		1.22532e-05	1.22532e-05	4											9	5.96046	0.106406	0.0929513	0.0911291	0.0892728	0.087428	0.0856391	0.0839454	0.0823776	0.0809564
																						6.82365	6.82365	6.82366		1.3056e-05	1.3056e-05	4											10	7.45058	0.11634	0.102885	0.101063	0.0992069	0.097362	0.0955731	0.0938794	0.0923116	0.0908905
																						5.85472	5.85472	5.85473		1.31382e-05	1.31382e-05	4											11	9.31323	0.128758	0.115303	0.113481	0.111624	0.10978	0.107991	0.106297	0.104729	0.103308
																						4.97218	4.97218	4.9722		1.26554e-05	1.26554e-05	4											12	11.6415	0.14428	0.130825	0.129003	0.127146	0.125302	0.123513	0.121819	0.120251	0.11883
																						18.3964	18.3964	18.3964		-7.37979e-06	-7.37979e-06	4											13	14.5519	0.163682	0.150227	0.148405	0.146549	0.144704	0.142915	0.141221	0.139653	0.138232
																						17.8492	17.8492	17.8492		-4.17234e-06	-4.17234e-06	4											14	18.1899	0.187936	0.174481	0.172658	0.170802	0.168957	0.167168	0.165474	0.163906	0.162485
																						17.2092	17.2092	17.2092		-6.54147e-07	-6.54147e-07	4											15	22.7374	0.218252	0.204797	0.202975	0.201118	0.199273	0.197484	0.195791	0.194223	0.192801
																						16.4711	16.4711	16.4711		3.09289e-06	3.09289e-06	4
																						15.6329	15.6329	15.6329		6.94351e-06	6.94351e-06	4
																						14.6979	14.6979	14.698		1.07316e-05	1.07316e-05	4
																						13.6756	13.6756	13.6756		1.42617e-05	1.42617e-05	4
																						12.5816	12.5816	12.5817		1.73309e-05	1.73309e-05	4
																						11.438	11.438	11.438		1.97568e-05	1.97568e-05	4
																						10.2709	10.2709	10.2709		2.14074e-05	2.14074e-05	4
																						9.10914	9.10914	9.10916		2.22231e-05	2.22231e-05	4
																						7.98072	7.98072	7.98075		2.22248e-05	2.22248e-05	4
																						6.91064	6.91064	6.91066		2.15068e-05	2.15068e-05	4
																						5.91864	5.91864	5.91866		2.02155e-05	2.02155e-05	4
																						5.01821	5.01821	5.01823		1.85221e-05	1.85221e-05	4
																						19.0224	19.0224	19.0224		8.89882e-06	8.89882e-06	4
																						18.4379	18.4379	18.4379		1.18617e-05	1.18617e-05	4
																						17.7558	17.7558	17.7558		1.50594e-05	1.50594e-05	4
																						16.9711	16.9711	16.9711		1.83928e-05	1.83928e-05	4
																						16.0826	16.0826	16.0826		2.17206e-05	2.17206e-05	4
																						15.0948	15.0948	15.0948		2.48639e-05	2.48639e-05	4
																						14.0185	14.0185	14.0185		2.76217e-05	2.76217e-05	4
																						12.8713	12.8713	12.8714		2.97952e-05	2.97952e-05	4
																						11.6769	11.6769	11.6769		3.12183e-05	3.12183e-05	4
																						10.4632	10.4632	10.4632		3.17868e-05	3.17868e-05	4
																						9.26003	9.26003	9.26006		3.14771e-05	3.14771e-05	4
																						8.09631	8.09631	8.09634		3.03505e-05	3.03505e-05	4
																						6.99713	6.99713	6.99716		2.85396e-05	2.85396e-05	4
																						5.98198	5.98198	5.982		2.62225e-05	2.62225e-05	4
																						5.06367	5.06367	5.06369		2.35933e-05	2.35933e-05	4
																						19.6557	19.6557	19.6557		1.51821e-05	1.51821e-05	4
																						19.0322	19.0322	19.0322		1.85102e-05	1.85102e-05	4
																						18.3063	18.3063	18.3064		2.20704e-05	2.20704e-05	4
																						17.4733	17.4733	17.4734		2.57392e-05	2.57392e-05	4
																						16.533	16.533	16.533		2.93455e-05	2.93455e-05	4
																						15.4908	15.4908	15.4909		3.26787e-05	3.26787e-05	4
																						14.3595	14.3595	14.3595		3.55079e-05	3.55079e-05	4
																						13.1582	13.1582	13.1582		3.76122e-05	3.76122e-05	4
																						11.9125	11.9125	11.9125		3.88157e-05	3.88157e-05	4
																						10.6519	10.6519	10.652		3.90192e-05	3.90192e-05	4
																						9.40757	9.40757	9.40761		3.82194e-05	3.82194e-05	4
																						8.20887	8.20887	8.20891		3.65088e-05	3.65088e-05	4
																						7.08105	7.08105	7.08109		3.40568e-05	3.40568e-05	4
																						6.0432	6.0432	6.04323		3.10789e-05	3.10789e-05	4
																						5.10747	5.10747	5.1075		2.7801e-05	2.7801e-05	4
																						20.2806	20.2806	20.2807		1.13401e-05	1.13401e-05	4
																						19.6175	19.6175	19.6176		1.569e-05	1.569e-05	4
																						18.8473	18.8473	18.8473		2.03424e-05	2.03424e-05	4
																						17.9655	17.9655	17.9655		2.51395e-05	2.51395e-05	4
																						16.9729	16.9729	16.9729		2.98644e-05	2.98644e-05	4
																						15.8764	15.8764	15.8765		3.42525e-05	3.42525e-05	4
																						14.6902	14.6902	14.6902		3.80172e-05	3.80172e-05	4
																						13.4353	13.4353	13.4354		4.08879e-05	4.08879e-05	4
																						12.1392	12.1392	12.1392		4.26532e-05	4.26532e-05	4
																						10.8328	10.8328	10.8329		4.31987e-05	4.31987e-05	4
																						9.5484	9.5484	9.54844		4.25274e-05	4.25274e-05	4
																						8.31589	8.31589	8.31594		4.07575e-05	4.07575e-05	4
																						7.16054	7.16054	7.16058		3.80972e-05	3.80972e-05	4
																						6.10101	6.10101	6.10104		3.48059e-05	3.48059e-05	4
																						5.1487	5.1487	5.14873		3.11524e-05	3.11524e-05	4
																						20.8825	20.8825	20.8825		-1.79007e-06	-1.79007e-06	4
																						20.1802	20.1802	20.1802		4.21749e-06	4.21749e-06	4
																						19.366	19.366	19.366		1.06635e-05	1.06635e-05	4
																						18.4362	18.4362	18.4362		1.73443e-05	1.73443e-05	4
																						17.3924	17.3924	17.3924		2.39798e-05	2.39798e-05	4
																						16.2429	16.2429	16.2429		3.02296e-05	3.02296e-05	4
																						15.0034	15.0034	15.0034		3.57262e-05	3.57262e-05	4
																						13.6969	13.6969	13.6969		4.01241e-05	4.01241e-05	4
																						12.3523	12.3523	12.3523		4.31544e-05	4.31544e-05	4
																						11.0022	11.0022	11.0023		4.46705e-05	4.46705e-05	4
																						9.67975	9.67975	9.67979		4.46726e-05	4.46726e-05	4
																						8.41535	8.41535	8.41539		4.33022e-05	4.33022e-05	4
																						7.23416	7.23416	7.2342		4.08098e-05	4.08098e-05	4
																						6.15437	6.15437	6.1544		3.75069e-05	3.75069e-05	4
																						5.18665	5.18665	5.18668		3.37154e-05	3.37154e-05	4
																						21.4487	21.4487	21.4486		-2.25856e-05	-2.25856e-05	4
																						20.7084	20.7084	20.7084		-1.43703e-05	-1.43703e-05	4
																						19.8519	19.8519	19.8519		-5.52893e-06	-5.52893e-06	4
																						18.8761	18.8761	18.8761		3.67761e-06	3.67761e-06	4
																						17.7834	17.7834	17.7834		1.28903e-05	1.28903e-05	4
																						16.5834	16.5834	16.5834		2.16729e-05	2.16729e-05	4
																						15.2934	15.2934	15.2934		2.95562e-05	2.95562e-05	4
																						13.9382	13.9382	13.9382		3.60995e-05	3.60995e-05	4
																						12.5482	12.5482	12.5482		4.09597e-05	4.09597e-05	4
																						11.1574	11.1574	11.1574		4.39468e-05	4.39468e-05	4
																						9.79965	9.79965	9.79969		4.50528e-05	4.50528e-05	4
																						8.50582	8.50582	8.50587		4.44427e-05	4.44427e-05	4
																						7.30092	7.30092	7.30096		4.24141e-05	4.24141e-05	4
																						6.20262	6.20262	6.20266		3.9338e-05	3.9338e-05	4
																						5.22088	5.22088	5.22091		3.55978e-05	3.55978e-05	4
																						21.9695	21.9695	21.9695		-4.8948e-05	-4.8948e-05	4
																						21.1935	21.1935	21.1934		-3.81099e-05	-3.81099e-05	4
																						20.2973	20.2973	20.2973		-2.64236e-05	-2.64236e-05	4
																						19.2783	19.2783	19.2783		-1.42166e-05	-1.42166e-05	4
																						18.1399	18.1399	18.1399		-1.9399e-06	-1.9399e-06	4
																						16.893	16.893	16.893		9.85997e-06	9.85997e-06	4
																						15.5564	15.5564	15.5564		2.05965e-05	2.05965e-05	4
																						14.1563	14.1563	14.1563		2.97206e-05	2.97206e-05	4
																						12.7247	12.7247	12.7247		3.68045e-05	3.68045e-05	4
																						11.2967	11.2967	11.2967		4.16089e-05	4.16089e-05	4
																						9.90696	9.90696	9.907		4.41158e-05	4.41158e-05	4
																						8.58655	8.58655	8.5866		4.45156e-05	4.45156e-05	4
																						7.36032	7.36032	7.36036		4.31573e-05	4.31573e-05	4
																						6.24544	6.24544	6.24548		4.04768e-05	4.04768e-05	4
																						5.25118	5.25118	5.25122		3.69247e-05	3.69247e-05	4
																						22.439	22.439	22.4389		-7.86493e-05	-7.86493e-05	4
																						21.6301	21.6301	21.63		-6.4934e-05	-6.4934e-05	4
																						20.6974	20.6974	20.6973		-5.01306e-05	-5.01306e-05	4
																						19.6389	19.6389	19.6388		-3.46404e-05	-3.46404e-05	4
																						18.4588	18.4588	18.4588		-1.90144e-05	-1.90144e-05	4
																						17.1693	17.1693	17.1693		-3.91839e-06	-3.91839e-06	4
																						15.7903	15.7903	15.7903		9.93558e-06	9.93558e-06	4
																						14.3497	14.3497	14.3498		2.18835e-05	2.18835e-05	4
																						12.8808	12.8808	12.8808		3.14089e-05	3.14089e-05	4
																						11.4196	11.4196	11.4196		3.82219e-05	3.82219e-05	4
																						10.0013	10.0013	10.0014		4.2295e-05	4.2295e-05	4
																						8.65735	8.65735	8.65739		4.38465e-05	4.38465e-05	4
																						7.41227	7.41227	7.41232		4.32793e-05	4.32793e-05	4
																						6.28281	6.28281	6.28285		4.10971e-05	4.10971e-05	4
																						5.27757	5.27757	5.27761		3.78206e-05	3.78206e-05	4
																						22.8545	22.8545	22.8544		-0.00010963	-0.00010963	4
																						22.0159	22.0159	22.0158		-9.29429e-05	-9.29429e-05	4
																						21.0504	21.0504	21.0503		-7.49258e-05	-7.49258e-05	4
																						19.9564	19.9564	19.9564		-5.60566e-05	-5.60566e-05	4
																						18.7391	18.7391	18.739		-3.69898e-05	-3.69898e-05	4
																						17.4115	17.4115	17.4114		-1.85133e-05	-1.85133e-05	4
																						15.995	15.995	15.995		-1.46593e-06	-1.46593e-06	4
																						14.5185	14.5185	14.5185		1.33729e-05	1.33729e-05	4
																						13.0166	13.0166	13.0167		2.53994e-05	2.53994e-05	4
																						11.5262	11.5262	11.5262		3.42749e-05	3.42749e-05	4
																						10.083	10.083	10.0831		3.99649e-05	3.99649e-05	4
																						8.7185	8.7185	8.71854		4.27169e-05	4.27169e-05	4
																						7.45706	7.45706	7.4571		4.29889e-05	4.29889e-05	4
																						6.31495	6.31495	6.31499		4.13521e-05	4.13521e-05	4
																						5.30024	5.30024	5.30027		3.83966e-05	3.83966e-05	4
																						23.2162	23.2162	23.2161		-0.000140193	-0.000140193	4
																						22.3514	22.3514	22.3513		-0.000120581	-0.000120581	4
																						21.3569	21.3569	21.3568		-9.94053e-05	-9.94053e-05	4
																						20.2317	20.2317	20.2316		-7.72219e-05	-7.72219e-05	4
																						18.9816	18.9816	18.9815		-5.47871e-05	-5.47871e-05	4
																						17.6206	17.6206	17.6206		-3.30078e-05	-3.30078e-05	4
																						16.1713	16.1713	16.1713		-1.28463e-05	-1.28463e-05	4
																						14.6637	14.6637	14.6637		4.80803e-06	4.80803e-06	4
																						13.1332	13.1332	13.1332		1.92687e-05	1.92687e-05	4
																						11.6175	11.6175	11.6175		3.01526e-05	3.01526e-05	4
																						10.1528	10.1528	10.1529		3.74207e-05	3.74207e-05	4
																						8.77063	8.77063	8.77068		4.13504e-05	4.13504e-05	4
																						7.49516	7.49516	7.49521		4.24534e-05	4.24534e-05	4
																						6.34226	6.34226	6.3423		4.13663e-05	4.13663e-05	4
																						5.31946	5.31946	5.3195		3.87454e-05	3.87454e-05	4
																						23.5267	23.5267	23.5266		-0.000169092	-0.000169092	4
																						22.639	22.639	22.6389		-0.000146709	-0.000146709	4
																						21.6194	21.6194	21.6192		-0.000122548	-0.000122548	4
																						20.4671	20.4671	20.467		-9.72367e-05	-9.72367e-05	4
																						19.1886	19.1886	19.1886		-7.16294e-05	-7.16294e-05	4
																						17.7989	17.7989	17.7989		-4.67456e-05	-4.67456e-05	4
																						16.3213	16.3213	16.3213		-2.36622e-05	-2.36622e-05	4
																						14.7869	14.7869	14.7869		-3.3707e-06	-3.3707e-06	4
																						13.232	13.232	13.232		1.33674e-05	1.33674e-05	4
																						11.6947	11.6947	11.6947		2.61296e-05	2.61296e-05	4
																						10.2118	10.2118	10.2118		3.48748e-05	3.48748e-05	4
																						8.81458	8.81458	8.81462		3.99098e-05	3.99098e-05	4
																						7.52723	7.52723	7.52728		4.17972e-05	4.17972e-05	4
																						6.36521	6.36521	6.36525		4.12345e-05	4.12345e-05	4
																						5.33559	5.33559	5.33563		3.8939e-05	3.8939e-05	4
																						23.79	23.79	23.7898		-0.000195524	-0.000195524	4
																						22.8827	22.8827	22.8826		-0.0001706	-0.0001706	4
																						21.8415	21.8415	21.8413		-0.000143703	-0.000143703	4
																						20.666	20.666	20.6659		-0.000115531	-0.000115531	4
																						19.3634	19.3634	19.3633		-8.70268e-05	-8.70268e-05	4
																						17.9492	17.9492	17.9491		-5.93136e-05	-5.93136e-05	4
																						16.4476	16.4476	16.4476		-3.35722e-05	-3.35722e-05	4
																						14.8905	14.8905	14.8905		-1.08858e-05	-1.08858e-05	4
																						13.3148	13.3148	13.3148		7.91779e-06	7.91779e-06	4
																						11.7594	11.7594	11.7594		2.23823e-05	2.23823e-05	4
																						10.261	10.261	10.2611		3.24662e-05	3.24662e-05	4
																						8.85128	8.85128	8.85132		3.85046e-05	3.85046e-05	4
																						7.55398	7.55398	7.55402		4.11064e-05	4.11064e-05	4
																						6.38432	6.38432	6.38436		4.10245e-05	4.10245e-05	4
																						5.34902	5.34902	5.34906		3.90312e-05	3.90312e-05	4
[truncated: 54 more columns]

## Sheet: Modifier equation
																							Calculated values
		No Inhibitor	[I]1	[I]2	[I]3	[I]4	[I]5	[I]6	[I]7	[I]8	[I]9	[I]10	[I]11	[I]12	[I]13	[I]14	[I]15					Ki	No Inhibitor	[I]1	[I]2	[I]3	[I]4	[I]5	[I]6	[I]7	[I]8	[I]9	[I]10	[I]11	[I]12	[I]13	[I]14	[I]15
		0	0.0439805	0.0549756	0.0687195	0.0858993	0.107374	0.134218	0.167772	0.209715	0.262144	0.32768	0.4096	0.512	0.64	0.8	1	K1	0.1	V1	15	0.13	0	0.0439805	0.0549756	0.0687195	0.0858993	0.107374	0.134218	0.167772	0.209715	0.262144	0.32768	0.4096	0.512	0.64	0.8	1
[S]1	1	13.6364	16.6997	17.2238	17.7926	18.3964	19.0224	19.6557	20.2806	20.8825	21.4487	21.9695	22.439	22.8545	23.2162	23.5267	23.79	K2	0.2	V2	30		13.6364	16.6997	17.2238	17.7926	18.3964	19.0224	19.6557	20.2806	20.8825	21.4487	21.9695	22.439	22.8545	23.2162	23.5267	23.79		13.6364	16.6997	17.2238	17.7926	18.3964	19.0224	19.6557	20.2806	20.8825	21.4487
[S]2	0.8	13.3333	16.2475	16.7432	17.2802	17.8492	18.4379	19.0322	19.6175	20.1802	20.7084	21.1935	21.6301	22.0159	22.3514	22.639	22.8827						13.3333	16.2475	16.7432	17.2802	17.8492	18.4379	19.0322	19.6175	20.1802	20.7084	21.1935	21.6301	22.0159	22.3514	22.639	22.8827		13.3333	16.2475	16.7432	17.2802	17.8492	18.4379	19.0322	19.6175	20.1802	20.7084
[S]3	0.64	12.973	15.7156	16.1788	16.6797	17.2092	17.7558	18.3063	18.8473	19.366	19.8519	20.2973	20.6974	21.0504	21.3569	21.6194	21.8415						12.973	15.7156	16.1788	16.6797	17.2092	17.7558	18.3063	18.8473	19.366	19.8519	20.2973	20.6974	21.0504	21.3569	21.6194	21.8415		12.973	15.7156	16.1788	16.6797	17.2092	17.7558	18.3063	18.8473	19.366	19.8519
[S]4	0.512	12.549	15.0977	15.5247	15.9854	16.4711	16.9711	17.4733	17.9655	18.4362	18.8761	19.2783	19.6389	19.9564	20.2317	20.4671	20.666						12.549	15.0977	15.5247	15.9854	16.4711	16.9711	17.4733	17.9655	18.4362	18.8761	19.2783	19.6389	19.9564	20.2317	20.4671	20.666		12.549	15.0977	15.5247	15.9854	16.4711	16.9711	17.4733	17.9655	18.4362	18.8761
[S]5	0.4096	12.0565	14.3904	14.7779	15.1947	15.6329	16.0826	16.533	16.9729	17.3924	17.7834	18.1399	18.4588	18.7391	18.9816	19.1886	19.3634						12.0565	14.3904	14.7779	15.1947	15.6329	16.0826	16.533	16.9729	17.3924	17.7834	18.1399	18.4588	18.7391	18.9816	19.1886	19.3634		12.0565	14.3904	14.7779	15.1947	15.6329	16.0826	16.533	16.9729	17.3924	17.7834
[S]6	0.32768	11.4927	13.5944	13.9397	14.3099	14.6979	15.0948	15.4908	15.8764	16.2429	16.5834	16.893	17.1693	17.4115	17.6206	17.7989	17.9492			Sum R2	6.94198e-28		11.4927	13.5944	13.9397	14.3099	14.6979	15.0948	15.4908	15.8764	16.2429	16.5834	16.893	17.1693	17.4115	17.6206	17.7989	17.9492		11.4927	13.5944	13.9397	14.3099	14.6979	15.0948	15.4908	15.8764	16.2429	16.5834
[S]7	0.262144	10.858	12.7152	13.0168	13.3391	13.6756	14.0185	14.3595	14.6902	15.0034	15.2934	15.5564	15.7903	15.995	16.1713	16.3213	16.4476			Sum residuals %	1.68816e-14		10.858	12.7152	13.0168	13.3391	13.6756	14.0185	14.3595	14.6902	15.0034	15.2934	15.5564	15.7903	15.995	16.1713	16.3213	16.4476		10.858	12.7152	13.0168	13.3391	13.6756	14.0185	14.3595	14.6902	15.0034	15.2934
[S]8	0.209715	10.1568	11.7642	12.0219	12.2963	12.5816	12.8713	13.1582	13.4353	13.6969	13.9382	14.1563	14.3497	14.5185	14.6637	14.7869	14.8905						10.1568	11.7642	12.0219	12.2963	12.5816	12.8713	13.1582	13.4353	13.6969	13.9382	14.1563	14.3497	14.5185	14.6637	14.7869	14.8905		10.1568	11.7642	12.0219	12.2963	12.5816	12.8713	13.1582	13.4353	13.6969	13.9382
[S]9	0.167772	9.39822	10.7584	10.9735	11.2016	11.438	11.6769	11.9125	12.1392	12.3523	12.5482	12.7247	12.8808	13.0166	13.1332	13.232	13.3148						9.39822	10.7584	10.9735	11.2016	11.438	11.6769	11.9125	12.1392	12.3523	12.5482	12.7247	12.8808	13.0166	13.1332	13.232	13.3148		9.39822	10.7584	10.9735	11.2016	11.438	11.6769	11.9125	12.1392	12.3523	12.5482
[S]10	0.134218	8.5957	9.71958	9.89481	10.0799	10.2709	10.4632	10.6519	10.8328	11.0022	11.1574	11.2967	11.4196	11.5262	11.6175	11.6947	11.7594						8.5957	9.71958	9.89481	10.0799	10.2709	10.4632	10.6519	10.8328	11.0022	11.1574	11.2967	11.4196	11.5262	11.6175	11.6947	11.7594		8.5957	9.71958	9.89481	10.0799	10.2709	10.4632	10.6519	10.8328	11.0022	11.1574
[S]11	0.107374	7.7667	8.67282	8.81207	8.9586	9.10914	9.26003	9.40757	9.5484	9.67975	9.79965	9.90696	10.0013	10.083	10.1528	10.2118	10.261						7.7667	8.67282	8.81207	8.9586	9.10914	9.26003	9.40757	9.5484	9.67975	9.79965	9.90696	10.0013	10.083	10.1528	10.2118	10.261		7.7667	8.67282	8.81207	8.9586	9.10914	9.26003	9.40757	9.5484	9.67975	9.79965
[S]12	0.0858993	6.93112	7.64381	7.75177	7.86494	7.98072	8.09631	8.20887	8.31589	8.41535	8.50582	8.58655	8.65735	8.7185	8.77063	8.81458	8.85128						6.93112	7.64381	7.75177	7.86494	7.98072	8.09631	8.20887	8.31589	8.41535	8.50582	8.58655	8.65735	8.7185	8.77063	8.81458	8.85128		6.93112	7.64381	7.75177	7.86494	7.98072	8.09631	8.20887	8.31589	8.41535	8.50582
[S]13	0.0687195	6.1095	6.65658	6.7383	6.82365	6.91064	6.99713	7.08105	7.16054	7.23416	7.30092	7.36032	7.41227	7.45706	7.49516	7.52723	7.55398						6.1095	6.65658	6.7383	6.82365	6.91064	6.99713	7.08105	7.16054	7.23416	7.30092	7.36032	7.41227	7.45706	7.49516	7.52723	7.55398		6.1095	6.65658	6.7383	6.82365	6.91064	6.99713	7.08105	7.16054	7.23416	7.30092
[S]14	0.0549756	5.32106	5.7313	5.79178	5.85472	5.91864	5.98198	6.0432	6.10101	6.15437	6.20262	6.24544	6.28281	6.31495	6.34226	6.36521	6.38432						5.32106	5.7313	5.79178	5.85472	5.91864	5.98198	6.0432	6.10101	6.15437	6.20262	6.24544	6.28281	6.31495	6.34226	6.36521	6.38432		5.32106	5.7313	5.79178	5.85472	5.91864	5.98198	6.0432	6.10101	6.15437	6.20262
[S]15	0.0439805	4.58192	4.88288	4.92671	4.97218	5.01821	5.06367	5.10747	5.1487	5.18665	5.22088	5.25118	5.27757	5.30024	5.31946	5.33559	5.34902						4.58192	4.88288	4.92671	4.97218	5.01821	5.06367	5.10747	5.1487	5.18665	5.22088	5.25118	5.27757	5.30024	5.31946	5.33559	5.34902		4.58192	4.88288	4.92671	4.97218	5.01821	5.06367	5.10747	5.1487	5.18665	5.22088
	1	1	1	1	1	1	1	1	1	1	1	1	1	1	1	1	1																					1	1	13.6364	16.6997	17.2238	17.7926	18.3964	19.0224	19.6557	20.2806	20.8825	21.4487
	1	1	1	1	1	1	1	1	1	1	1	1	1	1	1	1	1					13.6364	13.6364	13.6364		0	0	5										0.8	0.8	13.3333	16.2475	16.7432	17.2802	17.8492	18.4379	19.0322	19.6175	20.1802	20.7084
	1	1	1	1	1	1	1	1	1	1	1	1	1	1	1	1	1					13.3333	13.3333	13.3333		0	0	5										0.64	0.64	12.973	15.7156	16.1788	16.6797	17.2092	17.7558	18.3063	18.8473	19.366	19.8519
	1	1	1	1	1	1	1	1	1	1	1	1	1	1	1	1	1					12.973	12.973	12.973		0	0	5										0.512	0.512	12.549	15.0977	15.5247	15.9854	16.4711	16.9711	17.4733	17.9655	18.4362	18.8761
	1	1	1	1	1	1	1	1	1	1	1	1	1	1	1	1	1					12.549	12.549	12.549		0	0	5										0.4096	0.4096	12.0565	14.3904	14.7779	15.1947	15.6329	16.0826	16.533	16.9729	17.3924	17.7834
	1	1	1	1	1	1	1	1	1	1	1	1	1	1	1	1	1					12.0565	12.0565	12.0565		0	0	5										0.32768	0.32768	11.4927	13.5944	13.9397	14.3099	14.6979	15.0948	15.4908	15.8764	16.2429	16.5834
	1	1	1	1	1	1	1	1	1	1	1	1	1	1	1	1	1					11.4927	11.4927	11.4927		0	0	5										0.262144	0.262144	10.858	12.7152	13.0168	13.3391	13.6756	14.0185	14.3595	14.6902	15.0034	15.2934
	1	1	1	1	1	1	1	1	1	1	1	1	1	1	1	1	1					10.858	10.858	10.858		0	0	5										0.209715	0.209715	10.1568	11.7642	12.0219	12.2963	12.5816	12.8713	13.1582	13.4353	13.6969	13.9382
	1	1	1	1	1	1	1	1	1	1	1	1	1	1	1	1	1					10.1568	10.1568	10.1568		0	0	5										0.167772	0.167772	9.39822	10.7584	10.9735	11.2016	11.438	11.6769	11.9125	12.1392	12.3523	12.5482
	1	1	1	1	1	1	1	1	1	1	1	1	1	1	1	1	1					9.39822	9.39822	9.39822		0	0	5										0.134218	0.134218	8.5957	9.71958	9.89481	10.0799	10.2709	10.4632	10.6519	10.8328	11.0022	11.1574
	1	1	1	1	1	1	1	1	1	1	1	1	1	1	1	1	1					8.5957	8.5957	8.5957		0	0	5										0.107374	0.107374	7.7667	8.67282	8.81207	8.9586	9.10914	9.26003	9.40757	9.5484	9.67975	9.79965
	1	1	1	1	1	1	1	1	1	1	1	1	1	1	1	1	1					7.7667	7.7667	7.7667		0	0	5										0.0858993	0.0858993	6.93112	7.64381	7.75177	7.86494	7.98072	8.09631	8.20887	8.31589	8.41535	8.50582
	1	1	1	1	1	1	1	1	1	1	1	1	1	1	1	1	1					6.93112	6.93112	6.93112		0	0	5										0.0687195	0.0687195	6.1095	6.65658	6.7383	6.82365	6.91064	6.99713	7.08105	7.16054	7.23416	7.30092
	1	1	1	1	1	1	1	1	1	1	1	1	1	1	1	1	1					6.1095	6.1095	6.1095		0	0	5										0.0549756	0.0549756	5.32106	5.7313	5.79178	5.85472	5.91864	5.98198	6.0432	6.10101	6.15437	6.20262
	1	1	1	1	1	1	1	1	1	1	1	1	1	1	1	1	1					5.32106	5.32106	5.32106		0	0	5										0.0439805	0.0439805	4.58192	4.88288	4.92671	4.97218	5.01821	5.06367	5.10747	5.1487	5.18665	5.22088
																						4.58192	4.58192	4.58192		0	0	5
																						16.6997	16.6997	16.6997		0	0	5											1	0.0733333	0.0598812	0.0580592	0.0562031	0.0543584	0.0525696	0.0508759	0.0493081	0.047887	0.046623
																						16.2475	16.2475	16.2475		0	0	5											1.25	0.075	0.0615479	0.0597259	0.0578697	0.056025	0.0542362	0.0525425	0.0509748	0.0495536	0.0482896
																						15.7156	15.7156	15.7156		0	0	5											1.5625	0.0770833	0.0636312	0.0618092	0.0599531	0.0581084	0.0563196	0.0546259	0.0530581	0.051637	0.050373
																						15.0977	15.0977	15.0977		0	0	5											1.95312	0.0796875	0.0662354	0.0644134	0.0625572	0.0607125	0.0589237	0.05723	0.0556623	0.0542411	0.0529771
																						14.3904	14.3904	14.3904		0	0	5											2.44141	0.0829427	0.0694906	0.0676686	0.0658124	0.0639677	0.0621789	0.0604852	0.0589175	0.0574963	0.0562324
																						13.5944	13.5944	13.5944		0	0	5											3.05176	0.0870117	0.0735596	0.0717376	0.0698815	0.0680367	0.0662479	0.0645543	0.0629865	0.0615653	0.0603014
																						12.7152	12.7152	12.7152		0	0	5											3.8147	0.092098	0.0786459	0.0768239	0.0749677	0.073123	0.0713342	0.0696405	0.0680727	0.0666516	0.0653876
																						11.7642	11.7642	11.7642		0	0	5											4.76837	0.0984558	0.0850037	0.0831817	0.0813256	0.0794808	0.077692	0.0759984	0.0744306	0.0730094	0.0717455
																						10.7584	10.7584	10.7584		0	0	5											5.96046	0.106403	0.092951	0.091129	0.0892728	0.0874281	0.0856393	0.0839456	0.0823779	0.0809567	0.0796927
																						9.71958	9.71958	9.71958		0	0	5											7.45058	0.116337	0.102885	0.101063	0.0992069	0.0973622	0.0955734	0.0938797	0.092312	0.0908908	0.0896268
																						8.67282	8.67282	8.67282		0	0	5											9.31323	0.128755	0.115303	0.113481	0.111625	0.10978	0.107991	0.106297	0.10473	0.103308	0.102044
																						7.64381	7.64381	7.64381		0	0	5											11.6415	0.144277	0.130825	0.129003	0.127147	0.125302	0.123513	0.121819	0.120252	0.118831	0.117567
																						6.65658	6.65658	6.65658		0	0	5											14.5519	0.163679	0.150227	0.148405	0.146549	0.144704	0.142916	0.141222	0.139654	0.138233	0.136969
																						5.7313	5.7313	5.7313		0	0	5											18.1899	0.187933	0.174481	0.172659	0.170802	0.168958	0.167169	0.165475	0.163907	0.162486	0.161222
																						4.88288	4.88288	4.88288		0	0	5											22.7374	0.218249	0.204797	0.202975	0.201119	0.199274	0.197485	0.195792	0.194224	0.192803	0.191539
																						17.2238	17.2238	17.2238		0	0	5
																						16.7432	16.7432	16.7432		0	0	5												13.6364	16.6997	17.2238	17.7926	18.3964	19.0224	19.6557	20.2806	20.8825	21.4487
																						16.1788	16.1788	16.1788		0	0	5												13.3333	16.2475	16.7432	17.2802	17.8492	18.4379	19.0322	19.6175	20.1802	20.7084
																						15.5247	15.5247	15.5247		0	0	5												12.973	15.7156	16.1788	16.6797	17.2092	17.7558	18.3063	18.8473	19.366	19.8519
																						14.7779	14.7779	14.7779		0	0	5												12.549	15.0977	15.5247	15.9854	16.4711	16.9711	17.4733	17.9655	18.4362	18.8761
																						13.9397	13.9397	13.9397		0	0	5												12.0565	14.3904	14.7779	15.1947	15.6329	16.0826	16.533	16.9729	17.3924	17.7834
																						13.0168	13.0168	13.0168		0	0	5												11.4927	13.5944	13.9397	14.3099	14.6979	15.0948	15.4908	15.8764	16.2429	16.5834
																						12.0219	12.0219	12.0219		0	0	5												10.858	12.7152	13.0168	13.3391	13.6756	14.0185	14.3595	14.6902	15.0034	15.2934
																						10.9735	10.9735	10.9735		0	0	5												10.1568	11.7642	12.0219	12.2963	12.5816	12.8713	13.1582	13.4353	13.6969	13.9382
																						9.89481	9.89481	9.89481		0	0	5												9.39822	10.7584	10.9735	11.2016	11.438	11.6769	11.9125	12.1392	12.3523	12.5482
																						8.81207	8.81207	8.81207		0	0	5												8.5957	9.71958	9.89481	10.0799	10.2709	10.4632	10.6519	10.8328	11.0022	11.1574
																						7.75177	7.75177	7.75177		0	0	5												7.7667	8.67282	8.81207	8.9586	9.10914	9.26003	9.40757	9.5484	9.67975	9.79965
																						6.7383	6.7383	6.7383		0	0	5												6.93112	7.64381	7.75177	7.86494	7.98072	8.09631	8.20887	8.31589	8.41535	8.50582
																						5.79178	5.79178	5.79178		0	0	5												6.1095	6.65658	6.7383	6.82365	6.91064	6.99713	7.08105	7.16054	7.23416	7.30092
																						4.92671	4.92671	4.92671		0	0	5												5.32106	5.7313	5.79178	5.85472	5.91864	5.98198	6.0432	6.10101	6.15437	6.20262
																						17.7926	17.7926	17.7926		0	0	5												4.58192	4.88288	4.92671	4.97218	5.01821	5.06367	5.10747	5.1487	5.18665	5.22088
																						17.2802	17.2802	17.2802		0	0	5
																						16.6797	16.6797	16.6797		0	0	5												1/s	0	0.0439805	0.0549756	0.0687195	0.0858993	0.107374	0.134218	0.167772	0.209715
																						15.9854	15.9854	15.9854		0	0	5											1	1	0.0733333	0.0598812	0.0580592	0.0562031	0.0543584	0.0525696	0.0508759	0.0493081	0.047887
																						15.1947	15.1947	15.1947		0	0	5											2	1.25	0.075	0.0615479	0.0597259	0.0578697	0.056025	0.0542362	0.0525425	0.0509748	0.0495536
																						14.3099	14.3099	14.3099		0	0	5											3	1.5625	0.0770833	0.0636312	0.0618092	0.0599531	0.0581084	0.0563196	0.0546259	0.0530581	0.051637
																						13.3391	13.3391	13.3391		0	0	5											4	1.95312	0.0796875	0.0662354	0.0644134	0.0625572	0.0607125	0.0589237	0.05723	0.0556623	0.0542411
																						12.2963	12.2963	12.2963		0	0	5											5	2.44141	0.0829427	0.0694906	0.0676686	0.0658124	0.0639677	0.0621789	0.0604852	0.0589175	0.0574963
																						11.2016	11.2016	11.2016		0	0	5											6	3.05176	0.0870117	0.0735596	0.0717376	0.0698815	0.0680367	0.0662479	0.0645543	0.0629865	0.0615653
																						10.0799	10.0799	10.0799		0	0	5											7	3.8147	0.092098	0.0786459	0.0768239	0.0749677	0.073123	0.0713342	0.0696405	0.0680727	0.0666516
																						8.9586	8.9586	8.9586		0	0	5											8	4.76837	0.0984558	0.0850037	0.0831817	0.0813256	0.0794808	0.077692	0.0759984	0.0744306	0.0730094
																						7.86494	7.86494	7.86494		0	0	5											9	5.96046	0.106403	0.092951	0.091129	0.0892728	0.0874281	0.0856393	0.0839456	0.0823779	0.0809567
																						6.82365	6.82365	6.82365		0	0	5											10	7.45058	0.116337	0.102885	0.101063	0.0992069	0.0973622	0.0955734	0.0938797	0.092312	0.0908908
																						5.85472	5.85472	5.85472		0	0	5											11	9.31323	0.128755	0.115303	0.113481	0.111625	0.10978	0.107991	0.106297	0.10473	0.103308
																						4.97218	4.97218	4.97218		0	0	5											12	11.6415	0.144277	0.130825	0.129003	0.127147	0.125302	0.123513	0.121819	0.120252	0.118831
																						18.3964	18.3964	18.3964		0	0	5											13	14.5519	0.163679	0.150227	0.148405	0.146549	0.144704	0.142916	0.141222	0.139654	0.138233
																						17.8492	17.8492	17.8492		0	0	5											14	18.1899	0.187933	0.174481	0.172659	0.170802	0.168958	0.167169	0.165475	0.163907	0.162486
																						17.2092	17.2092	17.2092		0	0	5											15	22.7374	0.218249	0.204797	0.202975	0.201119	0.199274	0.197485	0.195792	0.194224	0.192803
																						16.4711	16.4711	16.4711		0	0	5
																						15.6329	15.6329	15.6329		0	0	5
																						14.6979	14.6979	14.6979		0	0	5
																						13.6756	13.6756	13.6756		0	0	5
																						12.5816	12.5816	12.5816		0	0	5
																						11.438	11.438	11.438		0	0	5
																						10.2709	10.2709	10.2709		0	0	5
																						9.10914	9.10914	9.10914		0	0	5
																						7.98072	7.98072	7.98072		0	0	5
																						6.91064	6.91064	6.91064		0	0	5
																						5.91864	5.91864	5.91864		0	0	5
																						5.01821	5.01821	5.01821		0	0	5
																						19.0224	19.0224	19.0224		0	0	5
																						18.4379	18.4379	18.4379		0	0	5
																						17.7558	17.7558	17.7558		0	0	5
																						16.9711	16.9711	16.9711		0	0	5
																						16.0826	16.0826	16.0826		0	0	5
																						15.0948	15.0948	15.0948		0	0	5
																						14.0185	14.0185	14.0185		0	0	5
																						12.8713	12.8713	12.8713		0	0	5
																						11.6769	11.6769	11.6769		0	0	5
																						10.4632	10.4632	10.4632		0	0	5
																						9.26003	9.26003	9.26003		0	0	5
																						8.09631	8.09631	8.09631		0	0	5
																						6.99713	6.99713	6.99713		0	0	5
																						5.98198	5.98198	5.98198		0	0	5
																						5.06367	5.06367	5.06367		0	0	5
																						19.6557	19.6557	19.6557		0	0	5
																						19.0322	19.0322	19.0322		0	0	5
																						18.3063	18.3063	18.3063		0	0	5
																						17.4733	17.4733	17.4733		0	0	5
																						16.533	16.533	16.533		0	0	5
																						15.4908	15.4908	15.4908		0	0	5
																						14.3595	14.3595	14.3595		0	0	5
																						13.1582	13.1582	13.1582		0	0	5
																						11.9125	11.9125	11.9125		0	0	5
																						10.6519	10.6519	10.6519		0	0	5
																						9.40757	9.40757	9.40757		0	0	5
																						8.20887	8.20887	8.20887		0	0	5
																						7.08105	7.08105	7.08105		0	0	5
																						6.0432	6.0432	6.0432		0	0	5
																						5.10747	5.10747	5.10747		0	0	5
																						20.2806	20.2806	20.2806		0	0	5
																						19.6175	19.6175	19.6175		0	0	5
																						18.8473	18.8473	18.8473		0	0	5
																						17.9655	17.9655	17.9655		0	0	5
																						16.9729	16.9729	16.9729		0	0	5
																						15.8764	15.8764	15.8764		0	0	5
																						14.6902	14.6902	14.6902		0	0	5
																						13.4353	13.4353	13.4353		0	0	5
																						12.1392	12.1392	12.1392		0	0	5
																						10.8328	10.8328	10.8328		0	0	5
																						9.5484	9.5484	9.5484		0	0	5
																						8.31589	8.31589	8.31589		0	0	5
																						7.16054	7.16054	7.16054		0	0	5
																						6.10101	6.10101	6.10101		0	0	5
																						5.1487	5.1487	5.1487		0	0	5
																						20.8825	20.8825	20.8825		0	0	5
																						20.1802	20.1802	20.1802		0	0	5
																						19.366	19.366	19.366		0	0	5
																						18.4362	18.4362	18.4362		0	0	5
																						17.3924	17.3924	17.3924		0	0	5
																						16.2429	16.2429	16.2429		0	0	5
																						15.0034	15.0034	15.0034		0	0	5
																						13.6969	13.6969	13.6969		0	0	5
																						12.3523	12.3523	12.3523		0	0	5
																						11.0022	11.0022	11.0022		0	0	5
																						9.67975	9.67975	9.67975		0	0	5
																						8.41535	8.41535	8.41535		0	0	5
																						7.23416	7.23416	7.23416		0	0	5
																						6.15437	6.15437	6.15437		0	0	5
																						5.18665	5.18665	5.18665		0	0	5
																						21.4487	21.4487	21.4487		0	0	5
																						20.7084	20.7084	20.7084		0	0	5
																						19.8519	19.8519	19.8519		0	0	5
																						18.8761	18.8761	18.8761		0	0	5
																						17.7834	17.7834	17.7834		0	0	5
																						16.5834	16.5834	16.5834		0	0	5
																						15.2934	15.2934	15.2934		0	0	5
																						13.9382	13.9382	13.9382		0	0	5
																						12.5482	12.5482	12.5482		0	0	5
																						11.1574	11.1574	11.1574		0	0	5
																						9.79965	9.79965	9.79965		0	0	5
																						8.50582	8.50582	8.50582		0	0	5
																						7.30092	7.30092	7.30092		0	0	5
																						6.20262	6.20262	6.20262		0	0	5
																						5.22088	5.22088	5.22088		0	0	5
																						21.9695	21.9695	21.9695		0	0	5
																						21.1935	21.1935	21.1935		0	0	5
																						20.2973	20.2973	20.2973		0	0	5
																						19.2783	19.2783	19.2783		0	0	5
																						18.1399	18.1399	18.1399		0	0	5
																						16.893	16.893	16.893		0	0	5
																						15.5564	15.5564	15.5564		0	0	5
																						14.1563	14.1563	14.1563		0	0	5
																						12.7247	12.7247	12.7247		0	0	5
																						11.2967	11.2967	11.2967		0	0	5
																						9.90696	9.90696	9.90696		0	0	5
																						8.58655	8.58655	8.58655		0	0	5
																						7.36032	7.36032	7.36032		0	0	5
																						6.24544	6.24544	6.24544		0	0	5
																						5.25118	5.25118	5.25118		0	0	5
																						22.439	22.439	22.439		0	0	5
																						21.6301	21.6301	21.6301		0	0	5
																						20.6974	20.6974	20.6974		0	0	5
																						19.6389	19.6389	19.6389		0	0	5
																						18.4588	18.4588	18.4588		0	0	5
																						17.1693	17.1693	17.1693		0	0	5
																						15.7903	15.7903	15.7903		0	0	5
																						14.3497	14.3497	14.3497		0	0	5
																						12.8808	12.8808	12.8808		0	0	5
																						11.4196	11.4196	11.4196		0	0	5
																						10.0013	10.0013	10.0013		0	0	5
																						8.65735	8.65735	8.65735		0	0	5
																						7.41227	7.41227	7.41227		0	0	5
																						6.28281	6.28281	6.28281		0	0	5
																						5.27757	5.27757	5.27757		0	0	5
																						22.8545	22.8545	22.8545		0	0	5
																						22.0159	22.0159	22.0159		0	0	5
																						21.0504	21.0504	21.0504		0	0	5
																						19.9564	19.9564	19.9564		0	0	5
																						18.7391	18.7391	18.7391		0	0	5
																						17.4115	17.4115	17.4115		0	0	5
																						15.995	15.995	15.995		0	0	5
																						14.5185	14.5185	14.5185		0	0	5
																						13.0166	13.0166	13.0166		0	0	5
																						11.5262	11.5262	11.5262		0	0	5
																						10.083	10.083	10.083		0	0	5
																						8.7185	8.7185	8.7185		0	0	5
																						7.45706	7.45706	7.45706		0	0	5
																						6.31495	6.31495	6.31495		0	0	5
																						5.30024	5.30024	5.30024		0	0	5
																						23.2162	23.2162	23.2162		0	0	5
																						22.3514	22.3514	22.3514		0	0	5
																						21.3569	21.3569	21.3569		0	0	5
																						20.2317	20.2317	20.2317		0	0	5
																						18.9816	18.9816	18.9816		0	0	5
																						17.6206	17.6206	17.6206		0	0	5
																						16.1713	16.1713	16.1713		0	0	5
																						14.6637	14.6637	14.6637		0	0	5
																						13.1332	13.1332	13.1332		0	0	5
																						11.6175	11.6175	11.6175		0	0	5
																						10.1528	10.1528	10.1528		0	0	5
																						8.77063	8.77063	8.77063		0	0	5
																						7.49516	7.49516	7.49516		0	0	5
																						6.34226	6.34226	6.34226		0	0	5
																						5.31946	5.31946	5.31946		0	0	5
																						23.5267	23.5267	23.5267		0	0	5
																						22.639	22.639	22.639		0	0	5
																						21.6194	21.6194	21.6194		0	0	5
																						20.4671	20.4671	20.4671		0	0	5
																						19.1886	19.1886	19.1886		0	0	5
																						17.7989	17.7989	17.7989		0	0	5
																						16.3213	16.3213	16.3213		0	0	5
																						14.7869	14.7869	14.7869		0	0	5
																						13.232	13.232	13.232		0	0	5
																						11.6947	11.6947	11.6947		0	0	5
																						10.2118	10.2118	10.2118		0	0	5
																						8.81458	8.81458	8.81458		0	0	5
																						7.52723	7.52723	7.52723		0	0	5
																						6.36521	6.36521	6.36521		0	0	5
																						5.33559	5.33559	5.33559		0	0	5
																						23.79	23.79	23.79		0	0	5
																						22.8827	22.8827	22.8827		0	0	5
																						21.8415	21.8415	21.8415		0	0	5
																						20.666	20.666	20.666		0	0	5
																						19.3634	19.3634	19.3634		0	0	5
																						17.9492	17.9492	17.9492		0	0	5
																						16.4476	16.4476	16.4476		0	0	5
																						14.8905	14.8905	14.8905		0	0	5
																						13.3148	13.3148	13.3148		0	0	5
																						11.7594	11.7594	11.7594		0	0	5
																						10.261	10.261	10.261		0	0	5
																						8.85128	8.85128	8.85128		0	0	5
																						7.55398	7.55398	7.55398		0	0	5
																						6.38432	6.38432	6.38432		0	0	5
																						5.34902	5.34902	5.34902		0	0	5
[truncated: 54 more columns]
